# Supplementary material for: Comparative multi-tissue profiling reveals extensive tissue-specificity in transcriptome reprogramming during thermal adaptation
Source: eLife. 2022 May 17;11:e78556. doi: 10.7554/eLife.78556 (PMC9113744; doi:10.7554/eLife.78556)
Supplement: Supplementary file 1. [file elife-78556-supp1.xlsx]

## Sheet: Suplementary File 1
Gene symbol	This study	Cheng et. Al., 2018	Bai et al., 2017	Marcher et al., 2015	Xu et al., 2019	Hao et al., 2015_2days	Hao et al., 2015_4days
Bmp8b	4.87287	6.12428	2.06377	4.76505	5.62842	3.56306	2.62234
Ucp1	0.872779	3.28596	1.20507	1.01423	6.35014	1.63293	1.91255
Acot11	2.02349	5.32034		0.521826	3.79161	2.51605	2.24455
Adrb2	-0.38682	-2.62591	-1.40473	-1.95597		-2.90235	-3.58267
Dio2	-0.961876	2.73972	2.94907		4.80593	3.4507	2.45272
Fgf21	3.02051	4.07174		2.82453	2.28679	2.44313	2.51961
Map2k6	-0.423292	-1.75693	-1.48367	-0.674661		-2.27555	-1.47328
Adcy3	1.20223	2.24484	2.06315	1.52549	2.2865
Ffar4		2.30602	1.75676	0.595205		2.12388	2.13418
Impdh1	-1.3015	-2.86492		-1.59666		-2.9516	-2.84862
Pgk1	0.583108	1.46732			1.71734	2.14888	1.67627
Ppif	0.429557	0.967319		0.711087	1.53188	1.66547
Sctr	-1.14025	-2.94387		-1.73021		-1.83012	-1.65534
Slc25a20		1.54022		0.553528	2.14728	1.61297	1.47031
Sorl1	2.60482	4.68306		1.0876		1.47328	1.57803
Acvr2b	-0.451295	-0.759637				-3.19042	-3.15731
Ccr2	-0.720136	-1.715		0.671014			-1.48816
Cox7a1	0.612647	1.10229		0.330412	3.25764
Gja1		1.32477		-0.34062		1.80651	1.67091
Idh3a		0.980659		0.451718	1.37557	2.55682
Irf4		-0.607724		-1.32989		-3.79812	-2.22177
Ndufa10		0.633369		-0.387002		1.50873	1.31214
Prlr	0.978207			1.51988		1.61718	2.06352
Acaa2	-0.388705			-0.450028	1.57432
Actn3	-0.798263			2.71771		-1.95738
Adipoq	-0.491364	-0.893035		-0.7284
Adrb3	0.637846	0.989989		-0.639105
Aldh1a1	-0.606245			-0.384209			-2.40545
Arntl	1.21289		1.91906	1.4593
Cycs	0.412216	0.656867			1.62724
Dock7	-0.370515	-0.940384		-0.388114
Epas1	0.409596	0.876123		0.324771
Fahd1	0.495083	0.693549				1.82463
G0s2	-0.770917	-1.52559				1.28736
Gadd45g	-1.49948		1.50138	0.558458
Gnas	-1.27876	-0.823285		0.835685
Gpr3		2.02314		4.0598	2.53859
Lep		-2.96867		-0.696287			-1.44695
Nr1d1	-0.719205	0.751517		-0.494091
Ogt	-0.462499	-1.39789		-0.32968
Oxtr	1.98248	-0.703896				1.85115
Pctp	0.737089	0.837155		0.552933
Per2	-0.441475	1.33612		-0.665592
Plcl2	-0.498939	-1.01861					-1.72216
Ache		0.96202				-1.87069
Aco2				-0.308594	1.55086
Acsl1	-0.467519	0.683881
Adamts5		-0.717585		0.429024
Adrb1	-0.442927			0.37502
Alms1	-0.379543	-1.22745
Cidea		0.778745			2.7377
Cpt2	0.611176	1.98223
Decr1		1.03498				1.4359
Dld		1.1108				1.72291
Ebf2	-0.616483	-0.948653
Esrrg				0.371246	2.71449
Gyk			2.32448	1.0455
Id1	-1.01668	-1.13951
Idh2		-0.651389		-0.456377
Idh3g		0.984007			1.08044
Il15			-1.44608	0.775133
Il4ra				0.560102		1.57115
Kdm6b	-0.814927			0.341507
Lama4		-0.73411		-0.465776
Lcn2		1.19353	1.90174
Lpin1	0.804351	0.96977
Mrps36		0.699426			1.21724
Npr3	0.606715			1.41947
Pdha1	0.543363	1.48967
Pemt						2.23435	1.60949
Pkm	1.22195	2.20114
Abhd6		1.55121
Acads		0.977583
Adam17				0.479961
Adipor1				0.315035
Adipor2				-0.380681
Arrdc3				-0.426776
Atf4			1.08239
Bmp8a				4.64354
Bscl2		1.10876
Cav1	-0.551867
Cebpb	-0.465352
Clic5				-0.458379
Cmklr1	0.448462
Cs					1.43845
Cxcr4	0.909277
Cyc1					1.49596
Ddit3				-0.486225
Dlst		0.978278
Etfdh		1.28868
Fabp4						1.64861
Fh1				-0.31891
Flcn		1.31269
Foxc2		-1.41587
Gatm	-0.478558
Ghrl	-0.856461
Grb10				0.397774
Hadhb		0.872947
Hdac3				-0.350038
Hoxa2				-0.948689
Igf1r		-1.39912
Il18		-1.3188
Il18r1		-0.74465
Lepr	-0.659871
Mfap2		-0.684161
Mfn2		0.630648
Mrpl34		0.607431
Ndufa8						1.2976
Ndufa9		0.823878
Ndufb8				-0.412852
Ndufs1		0.685289
Ndufv1				-0.437109
Notch1		-0.752657
Nova1		0.6589
Nova2	-0.76294
Oma1		0.621008
Pald1					1.29893
Pdgfc				-1.15772
Plac8				1.8192
Plcl1				0.53998
Acot13
Apc
Appl2
Cd36
Cnot3
Dhrs7b
Dync1h1
Ehmt1
Etfa
Etfb
Gpr39
Hadh
Hnrnpu
Hoxc10
Hsf1
Il13
Il4
Ip6k1
Jak2
Kdm1a
Kdm3a
Ksr2
Lgr4
Lnpep
Ndufs3
Nrd1
Pgam5
Pm20d1
