# Supplementary material for: Comparative multi-tissue profiling reveals extensive tissue-specificity in transcriptome reprogramming during thermal adaptation
Source: eLife. 2022 May 17;11:e78556. doi: 10.7554/eLife.78556 (PMC9113744; doi:10.7554/eLife.78556)
Supplement: Supplementary file 2. [file elife-78556-supp2.xlsx]

## Sheet: Suplementary File 2
Gene symbol	This study	Cheng et. Al., 2018	Bai et al., 2017	Marcher et al., 2015	Xu et al., 2019	Hao et al., 2015_2days	Hao et al., 2015_4days
Aacs	1.59809	3.33421
Aasdh							-1.75153
Abcb11	-2.30837	2.16797		3.39832
Abcd2	-0.895489	-1.17339		-1.44967
Abcd3		1.57185		0.428904		1.67951
Abcd4		0.75913
Abhd3	0.807484
Abhd5		1.52017				1.45261
Acaa1a				-0.333989		1.31979
Acaa1b		1.94079					1.67899
Acaca	1.17549	2.9482		-0.760838
Acacb	0.974034	2.3471			1.30376
Acad11	0.416537	0.934663		0.486568
Acad9	0.379995	0.79027
Acadl		0.789766				1.44523
Acadm		0.769996
Acadsb				-0.40509
Acadvl		1.03205			1.68745	1.79384
Acat1		0.675325
Acat2	0.669797	0.993955		-0.363028
Acat3	-1.6598	-3.59974		-0.387783	1.09499	-5.49015	-4.5406
Acly	1.65453	4.1179		-0.784868
Acot1		3.6056	1.78184	0.839656	2.44037	2.0169	2.22669
Acot12	2.49364	7.24738		2.17155	5.52222		2.40871
Acot2		1.08621		0.72013	1.70287
Acot3	-2.49572				3.42279
Acot4	-1.25149		1.45306
Acot5		2.53673		0.853348	5.64013
Acot6	-0.506039
Acot8		0.81587		0.660388		1.31267
Acox1		1.10728				1.376
Acox2	1.55459	4.16667	-1.18315
Acsf2	0.837425	2.6815		0.315614	1.12564	1.84542	1.65298
Acsf3	0.772437	1.74386
Acsl3	0.550126	2.68018
Acsl4	0.401732	0.612162
Acsl5	2.01593	5.05665		1.29241		3.34728	2.61312
Acsl6	-0.573565
Acsm3	-0.679785	-0.991397		-1.81237		-1.55898
Acsm5	-0.512446	-2.6815				-1.3881
Adh4				1.09975
Adh7						2.97079	3.212
Adtrp		0.616338		1.23905
Agt		-1.54681
Aig1	0.381857	1.00356		1.15207
Alox12	1.57504	1.42604		1.48593
Alox15		-1.33626
Angptl3				-0.69872
Ankrd23	-0.758885			0.843098	-2.45436	-2.29588	-1.75857
Apoa1	-4.62965	-1.12827
Apoa4							6.07297
Apoa5	-4.92046
Apoc2	0.962614	2.09631	1.33987
Auh				-0.355198
Baat		-2.04343
Bdh2	-0.802699
Brca1		-1.53084
C3				0.74859
Ces1d				0.526286
Ces1f	-0.648663			-1.13723
Cnr1		-1.126
Cpt1a				0.622612
Cpt1b					3.32611
Cpt1c		-0.635977
Crat		1.07718		0.336883
Crot				-0.378613
Cryl1	-0.461655			-0.869645
Cyb5a				-0.968361
Cyp1a1	1.79267	7.49554		0.511098	1.48156
Cyp1a2	-6.0682
Cyp1b1		-0.849658		0.651458
Cyp2e1	-0.372484	-2.36554		-0.631678		-1.76194	-1.43886
Cyp2s1		-1.29879
Cyp4a10	-1.08528
Cyp4f18							1.93908
Cyp4v3		-0.713142
Dbi		1.32675		-0.359831
Decr2	0.437253					1.36158
Dgat2	-0.495846			-0.704181
Ech1						1.50173
Echdc1	0.686774	2.56397		-0.637301
Echdc2				-0.651563
Echdc3				-0.576669
Eci1				-0.514347
Eci3	-0.771591	-3.18341		-0.4365
Ehhadh				0.413703	1.88075
Eif2ak3				0.40157
Elovl2	-1.86666
Elovl3	3.51353	11.4279	2.64422	2.70175	6.75788	3.73823	3.26488
Elovl4	1.9211	4.62175		3.11711		2.30286	2.36621
Elovl5	1.39947	2.30086
Elovl6	1.57251	3.75645				1.55612
Elovl7	-1.43527	-1.54155
Erlin1	-0.422716	-0.756461
Fa2h					-1.48573
Faah	-1.50638	-1.19498				-1.89253	-2.12365
Fabp1	-8.63106
Fabp3				1.25983	6.16711
Fads1		-0.791521		-0.411886		-1.26668
Fads3		-0.63605		-0.68313
Fasn	1.33068	4.53864		-0.472732			1.50752
Gcdh				-0.535694
Ggt1		2.16601
Ggt5		-0.642171
Gk	-0.554867	3.05267			3.54784
Gpam	0.54029	1.43744		0.476012	1.42504
Gpat4		0.706469
Gstm4	0.597472	0.688047		-0.375638
Hacd2	1.24975	2.29499				2.77196	1.65403
Hacl1		0.859099
Hadha	0.539387	1.82228			1.48128	1.26726
Hao1	-5.83782
Hnf4a	-4.58943
Hpgd						-1.60186
Hpgds	0.52553
Hsd17b10	-0.376814	-0.758758		-0.990688
Hsd17b4	0.438212	1.12333		0.37449
Insig1	0.715747	2.37768
Irs1	-0.467296	-1.11823		-1.14774
Irs2	-2.0276	-2.18996		0.633857
Ivd				-0.453963
Lipa	0.777068	1.63624		0.422114
Lipg	0.500675	0.796129	1.35083	0.513026
Liph	1.35006	2.97691
Lpgat1	0.392998			0.896361
Lpin2	0.555097	1.28784		0.688005
Lpl		0.848846		0.744739		1.60282
Ltc4s	0.678851	1.02156
Lypla1		0.751265
Mapk14	0.700705	0.773051		0.423944
Mecr						1.50509	1.37348
Mfsd2a	1.28909	6.93533		0.315712		2.80342	3.5269
Mgll	0.763701	1.81527		0.728388
Mid1ip1	1.63651	0.928596
Mlxipl	0.909987	1.25967
Mlycd	0.661426	1.59686		0.912161		2.41241	1.75594
Mtor	0.862384	2.17077		0.490424
Myo5a	1.06978	2.22272		0.437983
Naaa	-0.901741	-1.53225
Ncor1		-0.77353
Ndufab1	0.64701	0.714187
Nfe2l1		0.726851				2.76714	3.22174
Nr1h3	0.416327	0.909466
Nr4a3	-3.00352	-0.932628	2.49487	-4.02231
Oxsm		1.08013
Pdk4				0.677695
Pex13		0.971467
Pex7		0.772744		0.33107
Phyh				-0.351408
Pla2g15	-0.819438	-1.07021
Pla2g4a				1.47133
Plin5					2.54582
Pnpla3	0.950855	1.20211	-1.24344	-1.09697
Pnpla8		1.1226
Ppara	-1.24312	-1.20518			2.21653
Ppard	0.531177	0.957481		0.483683
Prkaa1		0.69738
Prkaa2		1.44563		0.379347
Prkab1	1.30597	1.66528
Prkab2				-0.690989
Prkag2	-1.00088	-2.31658
Prkag3	-0.46477				-2.98956	-2.1828	-1.95113
Ptgds	0.801111	3.01184		0.55716		1.53916	2.17133
Ptges	1.32793			-0.441867
Qk				0.341496
Rgn	-5.18348
Scd1		2.22411		-1.18321
Scd2	1.51829	3.18354		-0.30998
Scd3		2.46928		-1.02533
Scd4		2.3293		-1.00073
Scp2	0.409109	1.27698		0.390493
Sesn2	-1.04641	-0.979516
Sgpl1		0.916804				2.02148	1.56937
Slc22a13		2.07436
Slc25a17	0.45877	1.51179	1.38743	1.04172	1.30334	2.22582
Slc27a1	0.406611	0.833319		-0.392408
Slc27a2	-0.587847			0.356986
Slc27a5	-3.68176
Snca	0.455954			0.981066
Sox9		-2.61762		1.51402
Srebf1	0.687773	0.722331		-0.523655
Tbxas1				0.878625
Tecr	0.576013	1.21668		-0.66301
Tecrl	-1.29611						-3.51623
Them4	0.70031	1.16288	1.12218	0.738605		1.64151
Trex1				-0.544596
Trib3		-0.996161		0.573477
Twist1		-0.701779		-0.413536
Tysnd1	0.4097	0.608879		0.352772		1.52283
Wdtc1				0.585065
Tnxb
Tmem189
Them5
Slc45a3
Slc27a6
Slc27a4
Slc27a3
skimp
Sirt4
Scap
Ptgs2
Ptgs1
Ptgr1
Ptgis
Ptges3
Ptges2
Prxl2b
Prkar2b
Prkag1
Por
Plp1
Pla2g5
Pla2g1b
Pex5
Pex2
Pecr
Pank2
Pam
Olah
Nucb2
Nr1h2
Ndufs6
Mir696
Mir214
Mir199a-2
Mcat
Lypla2
Lpin3
Lonp2
Lipi
Lipe
Lipc
Insig2
Ins2
Ilvbl
Hnf1a
Hao2
Hacd4
Hacd3
Hacd1
H2-Ke6
Gpat2
Gnpat
Gm49387
Gm45753
Gip
Ghsr
Fads6
Fads2b
Fads2
Fabp2
Etfbkmt
Erlin2
Erfe
Elovl1
Eif6
Eci2
Echs1
Dgat1
Degs1
Cyp7a1
Cyp4f40
Cyp24a1
Cygb
Cbr4
C1qtnf9
C1qtnf2
Bmncr
Asah2
Aoah
Ankrd26
Aloxe3
Alox12e
Alox12b
Alkbh7
Aldh3a2
Akt2
Akt1
Adh5
Acsm4
Acsm2
Acsm1
Acsbg3
Acsbg2
Acsbg1
Acoxl
Acox3
Acot7
Acnat2
Acnat1
Abhd2
Abcd1
