# Supplementary material for: Comparative multi-tissue profiling reveals extensive tissue-specificity in transcriptome reprogramming during thermal adaptation
Source: eLife. 2022 May 17;11:e78556. doi: 10.7554/eLife.78556 (PMC9113744; doi:10.7554/eLife.78556)
Supplement: Supplementary file 3. [file elife-78556-supp3.xlsx]

## Sheet: Suplementary File 3
Gene symbol	Liver	BAT	VAT	SAT	Ileum	Brain	Quadriceps	# of Tissues
Ucp1		-2.27553		-8.09085				2
Moxd1	-7.83444				0.879596			2
Mup9	-7.25838							1
Aldob				-5.90125				1
Elovl3	-1.25498	-5.80599						2
Mup15	-5.48437							1
Mup20	-0.698496		-4.86615	-5.41382				3
Kng1			-3.08285	-5.25209				2
Dlx3				-5.04969				1
Ahsg			-2.78274	-4.87907				2
Acot1	0.784194	-4.85609		-0.621876	0.785657			4
Mylk4			-4.59596	-1.15744				2
Fcnb			-4.46395					1
Myh4			2.28107	-0.796731		-4.25373		3
Serpina10			-4.20642	0.921243				2
Atp4b		-4.19622						1
Nr4a3		-4.11378						1
Nmrk2				-4.09873				1
Adcy10		-4.09583	-2.09868	-2.46784				3
Dio2		-3.30131	-3.06882	-4.03606				3
Mfsd2a		-4.02657			1.24062			2
Slc27a2		-0.926443		-3.94798	1.55732			3
Adprhl1		-3.92133						1
Tnnt3			1.09782	-1.04157		-3.91716		3
Mup13	-3.91618							1
Chrna2	-0.704198	-3.90944		-1.73446				3
Mup2	-3.90379							1
Serpina1e			-3.88022	1.47456	-0.822884			3
Col10a1				-3.82459				1
Dio1	-3.8171				-0.764246			2
Otop1		-2.13489	-2.65511	-3.67205				3
St3gal5		-3.65859						1
Kcng4		-3.64426		-1.6866				2
Slc25a34		-3.5974						1
Aspg		-3.48627	-0.630204	-3.3631				3
Ccrn4l		-3.42592		-0.914707	-0.721932			3
Serpina3k			-2.64769	-3.40648				2
Ldhc			-3.37365					1
Mup3			-3.32881	-2.79946				2
Tmem171		-3.28396						1
3930402G23Rik		-3.1899						1
Aicda					-3.14988			1
9030619P08Rik	-3.11372							1
Gyk		-3.07459		-0.794945				2
Cox8b			-1.8472	-3.00319				2
Atp2a1			1.85917	-0.629949		-2.96147		3
Gm4841		-2.91967						1
Mup14	-2.90012							1
Apoa1			-2.83703	-2.89777				2
Cidea			-1.5271	-2.89612			-2.78532	3
Mup1	-2.89595							1
Rims4		-2.89523	-0.808075	-0.644947				3
Ehhadh		-2.87183		-1.15198				2
Gm15401		-2.86985						1
Fndc5		-2.82428	1.31287	-0.752292				3
Scd1	0.960267	-1.77246	-1.79969	-1.98219	-0.950543		-2.79717	6
Rpph1		-2.78754	0.650591					2
9830107B12Rik			-2.78098					1
Mef2b			1.12022	3.08222	-2.77264			3
Fasn	0.680667	-2.76912	-1.38849	-1.55845			-2.29355	5
Acot4	0.818906	-2.76154		-1.26519				3
Cecr2		0.964116			-2.72814			2
Gcsam			1.46709	2.59419	-2.69848			3
BC021614		-2.69813		1.09503				2
Mup7	-2.68001							1
Col9a1				-2.64103				1
Fbxl2		-2.6136						1
Fcrl5				1.38497	-2.60611			2
Gp2					-2.58961			1
Tectb		-2.58887						1
Fcamr				0.958121	-2.58592			2
Serpina1b			-2.56852	1.17332				2
Camp			-2.55498					1
Ephb2		-2.55451		-1.17287				2
Dhrs9		-2.55108	-0.720595	-0.757299				3
Mup11	-2.54366							1
Mup8	-2.5175							1
Slc35g1		-2.51532	-0.675474					2
Apoa2			-2.50975	-1.29679				2
Zbed6			-2.50655					1
Mybl1				2.44704	-2.48932			2
Plin5		-0.746527	-0.942368	-2.47102				3
Serpina1a			-2.45927	-1.64048				2
Derl3	-2.4416		0.617605	1.23998	-0.664047			4
Ms4a1			0.778374	1.54653	-2.44154			3
Fam131c	-1.45108	-2.43421						2
Ffar4		-2.43401		-1.03156				2
Npnt		-2.43291		-0.738856				2
D830031N03Rik		0.615152	-2.42894					2
Agpat2		-2.42227	-1.09269	-2.09424			-1.57387	4
5031414D18Rik			0.720122	1.78455	-2.41468			3
Elovl6		-2.41193	-2.29927	-2.21064			-2.04558	4
Dnajc22		-2.38036						1
Htra4					-2.37852			1
2310069B03Rik		-2.37071						1
Ttll11		-2.36236						1
Acot11	-0.792384	-2.36198		-1.59306				3
Acaa1b		-2.36182		-1.21542			-2.10014	3
Hephl1			-2.35945	-1.70898				2
Mmd2	-1.5057	-2.35424	0.747178	-2.05867				4
Acsl5		-2.35027						1
Chst3				1.72039	-2.34525			2
Slamf1				1.46323	-2.33783			2
Fam83a		-2.10561	-1.45082	-2.32406				3
Cxcr4		1.94051	0.68606	0.842284	-2.30734			4
Gm8369				1.82838	-2.29375			2
1300017J02Rik			-2.28631	0.8019				2
Serpina1d			-2.27291	1.33688				2
Aatk	-0.775508	-2.27062						2
Ccl19				0.844962	-2.25061			2
Rn45s		-2.25022				0.751711	-1.41919	3
Cox7a1	0.815223		-0.883217	-2.24951				3
Pdk4	0.824047	-0.673845	-0.679108	-2.22647				4
Ucp3		-2.22036	-1.02912	-1.67648				3
Tfr2		-2.2196	0.823588	-0.675795				3
Gys2		-1.39734	-1.81931	-2.20421				3
Gm826	-0.613647	-2.20045						2
Siglecg			0.883124	1.67006	-2.19879			3
Clstn3		-1.22383	-0.762145	-2.18702			-1.26492	4
Hfe2			-2.18511	-0.742781				2
Acsm2	-2.17667							1
Ces2b	-2.17129							1
Myl3		-0.876571	-2.1709	-0.601217				3
Klhl6				1.46489	-2.16796			2
H2-Q10		-1.39056	-1.73661	-1.79092			-2.16436	4
Gm4961		-2.16081						1
Blk			0.816297	1.8706	-2.1596			3
Chchd10			-1.3299	-2.1577				2
Ppp1r1a		-2.15214		-1.10546				2
Fcrla			1.06831	1.6814	-2.15171			3
Sorl1	0.718773	-2.13255	-1.58777					3
Nt5e		-2.13213					-0.656195	2
Pdzk1ip1	0.792817			-2.13178				2
Ankrd9		-2.12781		-0.692594				2
Dkkl1			-2.12572	1.03858				2
Mogat1		-2.12257		-1.13439				2
Me1		-2.11367	-1.45384	-1.78819				3
Tnfrsf13c				1.69232	-2.11053			2
Slc6a14					-2.10446			1
Cyp1a1	0.806102	-2.10178	1.57891				1.12966	4
Cxcr5				1.42007	-2.08695			2
Tph2						-2.08401		1
Syt12		-2.07789	-0.759621	-1.06889			-1.06574	4
Pou2f2				1.52199	-2.07772			2
Ccr7				1.29636	-2.07603			2
Cd19			0.897251	1.68526	-2.07483			3
Ccdc122		-2.07481		-0.655504				2
Slc2a5		-2.02947	-2.07313	-2.01578	0.987177			4
Lypd1		-1.04171		-2.07213				2
Cend1		-2.04506			-0.717072			2
Paqr9	-0.718398	-1.84458	-1.81289	-2.04324				4
Krt79		-1.9499	-0.680693	-2.04255				3
Mettl21c				-2.03057				1
Psg18					-2.03003			1
Cbl			-2.02815					1
Sell			0.731346	1.35053	-2.02798			3
Bfsp2				1.59764	-2.02606			2
Fbp2		-2.0258		-1.82033				2
Gpr174				1.58125	-2.02358			2
Pax5				1.68964	-2.02299			2
Chd3		-2.01602		0.760393				2
Haao				1.82708	-2.00772			2
Cr2			0.770934	1.69746	-2.00751			3
Lta				1.45152	-2.00084			2
Obp2a	-1.99485							1
Slc25a25	0.649742			-0.615738			-1.99445	3
P2rx5			-1.23373	-1.99356				2
Gldn		-1.99105						1
Ms4a4c			0.992904	1.40147	-1.98786			3
Slc22a7	-1.98082							1
Acss2		-1.98068	-1.73095	-1.53355				3
Cabyr	-1.97759							1
Phospho1	-1.0783	-0.605816	-0.706499	-1.97693				4
Acly		-1.97628	-1.63642	-1.53145			-1.15671	4
Cnr2		1.10513	0.700351	1.47194	-1.96872			4
Baiap2l2			-0.606959	-1.96354				2
Lars2		-1.95854			0.617915		-1.1127	3
Ar			-1.95794					1
Tespa1			0.758801	1.34438	-1.95698			3
Fcrl1			0.915712	1.65361	-1.9497			3
Sh2b2	0.625009	-0.831918		-0.834928	-1.93824			4
H2-Eb2			1.821	2.0756	-1.92979			3
Scn4a					-1.9178			1
Tox2			0.927472	1.44646	-1.91698			3
Faim3			1.33636	1.63596	-1.91124			3
Treml2				1.30216	-1.91105			2
Pou2af1			1.01597	1.8737	-1.90597			3
Hpca			1.45629	-1.90496				2
Acaca		-1.90071	-1.38588	-1.55907			-1.08509	4
Cd79a			0.99544	1.60798	-1.89608			3
Aff3		0.753565		1.27719	-1.89551			3
H2-Ob				1.74054	-1.89441			2
Slc13a5	-1.8943							1
Capn8	-1.89262							1
Dusp2			0.609487	1.222	-1.89109			3
Slc25a1		-1.8908	-1.04872	-1.55226			-1.39976	4
Rbp4		-1.88847		-0.759302			-0.65688	3
Stap1				1.47602	-1.88438			2
Cd22			0.77638	1.79766	-1.874			3
Gpnmb		1.27946	0.950228		-1.8716			3
Kcnj15		0.73239	-1.52042	-1.14331	-1.87136			4
Hebp2		-1.87019		-1.80458				2
Hspa1b	-1.8593			-0.744911	-1.26575		-1.68568	4
Ces4a	-1.8538							1
Rnf24		-1.85133		-0.736294	-0.751796		-0.658718	4
Crtac1		-1.15217		-1.84948				2
Gramd1b		-1.84849						1
Srpk3			0.76662	1.65627	-1.84838			3
Btk		1.19599		1.42363	-1.84774			3
Kcnk3			-0.761036	-1.47852			-1.84338	3
Hist1h1d			-1.83954	-1.40824				2
Mest	-0.782301	2.14823	-1.8389				0.77838	4
Zfp369			-1.83664					1
Nuggc			0.968567	3.08523	-1.83067			3
Selenbp2	-1.82588	1.28456						2
Folr4				1.60694	-1.82536			2
Cd37				1.47825	-1.82392			2
Cxcl13				1.37995	-1.82231			2
Mup12	-1.82174							1
Cd79b		1.80513	1.00011	1.53931	-1.82169			4
Klhdc7a		1.28235		-0.660345			-1.81089	3
Slamf6				1.59155	-1.80722			2
Cxcr7		-1.80335						1
3110001I22Rik	-0.673448	-1.79722						2
Rpl39l		-0.743629		-1.79494				2
Pomc						-1.79443		1
Pde7b		-1.79222						1
Golga7b		-1.39413	-1.235	-1.78715				3
C130026I21Rik				1.03904	-1.78521			2
Nat8l		-1.55052	-0.992997	-1.33419			-1.78432	4
Ly6d				1.03135	-1.78278			2
Slc4a4		-1.78239		-0.69762				2
Cilp				0.856716	-1.77981			2
H2-DMb2				1.59131	-1.77971			2
Ppara				-1.77752				1
Lyl1		1.0706		1.07384	-1.77742			3
44448		-1.77658						1
Stra6					-1.7765			1
BC035044				0.660449	-1.77485			2
Fcer2a			0.899075	1.81804	-1.77411			3
Apoc3			-1.67713	-1.77397	2.16738			3
Cd180		1.17063		1.50968	-1.77211			3
Ddhd2		-1.7701		-0.696759	0.648178			3
AB124611		1.16927	0.636222	1.13152	-1.76869			4
Batf				0.838657	-1.76675			2
A830018L16Rik		-1.02544	-0.958046	-1.76484				3
Mpc1		-1.31383	-1.03396	-1.75883				3
A630001G21Rik		0.828157		1.43591	-1.75693			3
Apmap		-1.75272		-0.886982				2
Clu		2.68488		1.22494	-1.75203			3
Scd4	1.04468	-1.7506						2
H2-Oa			0.926532	1.73566	-1.75002			3
Slc36a2		-0.637451	-0.8125	-1.41524	-1.40004		-1.74736	5
Vil1		-1.74619						1
Tmed5		-1.73787		-0.785381				2
Fam69b		-0.618829	-0.883731	-1.73787				3
Pgd		-1.73602	-0.662229	-1.02593				3
Btla			0.813235	1.87648	-1.72899			3
AW551984			-1.72769					1
Mpo			-1.72686					1
Pls1	-1.72476			1.99888				2
Deptor		-0.611792	-1.7231	-1.07955				3
B430212C06Rik			-0.935905	-1.72117				2
P2ry10				1.03904	-1.71507			2
Vpreb3				1.26522	-1.71365			2
Il9r			0.982549	1.78947	-1.71271			3
Nucb2	-1.71243	0.870892						2
Mrap		-0.616561	-0.753795	-1.40026	-0.846475		-1.7059	5
Cpxm1		0.731167	1.05705		-1.70381			3
Cacna1i			0.876938	1.76866	-1.70355			3
Echdc1		-1.70216	-0.764536	-1.59256				3
Ebf1		0.766983			-1.70185			2
S1pr2				0.669788	-1.69369			2
Atg9b		-1.69183		-1.29097				2
Bank1				1.50051	-1.68281			2
Gm15471		-1.6826						1
Susd3				0.883515	-1.68223			2
Zfp831			0.910861	1.82326	-1.67992			3
Cuzd1				-1.67792				1
Actc1			0.957809	-1.67762				2
Mpc2		-1.27059	-0.803913	-1.67536				3
Rhoh				1.61281	-1.67428			2
Ptprcap				1.26679	-1.67008			2
Klf14			-1.66774					1
Hapln4		-1.66025						1
Pank1				-1.65613				1
Trim63				-1.65414				1
Hip1r		-1.654		1.3155				2
Fam57b		-1.65398						1
Xlr4a	1.06773	-1.65319		1.25197				3
Fa2h					-1.6518			1
Rbp7			-0.794791	-1.65097				2
Il21r			0.668976	1.5922	-1.65094			3
Egr2		1.64679		-0.904313	-0.851101	-1.51124	-1.64968	5
Ccdc69		-1.6488						1
Adtrp		-0.924681	-0.715383	-1.64698				3
Oxtr			-1.57089	-1.64695				2
Hspa1a					-1.64284		-0.905066	2
Parm1		-0.804958	-1.29448	-1.64108				3
Ccr6				1.8685	-1.6405			2
Peg3		-1.33528	-1.63686	-0.909226				3
Uhmk1			-1.63507					1
Napsa		1.20764		1.38673	-1.63415			3
2022-03-01			-1.63311	-1.30412				2
Fabp3				-1.63306				1
Gale		-1.63129		-0.72591				2
B3galt2		-1.63122		-0.859956			-0.956468	3
G630090E17Rik		-1.62913						1
Tmem120a		-1.49345	-0.685736	-1.62822				3
Rasgrp3				1.05762	-1.62806			2
Tsc22d1	-1.6243							1
Fbn2			-1.62224	1.17731				2
Ikzf1		1.43112		1.49817	-1.6214			3
Ttc25		-1.58813		-1.61866				2
Parvg		1.02277	0.752419	1.41492	-1.61671			4
Ltb			0.715107	1.18149	-1.61004			3
Hadhb				-1.60938				1
Nxnl1		-1.42534		-1.60467				2
Niacr1		-0.935267		-1.60447				2
Snx10		-1.60213		-1.16725				2
Dok3		0.810413		1.62173	-1.59751			3
Adcy5			-1.48403	-1.59719			-0.829894	3
S1pr4			0.688475	1.22493	-1.59638			3
Gpr183			0.70576	1.44473	-1.58682			3
Madcam1					-1.58497			1
E330020D12Rik				1.43201	-1.58464			2
Rgs7		-1.30201	-1.07293	-1.58281				3
Gm16062		-1.58102						1
Slc9a7				1.3298	-1.58048			2
Mpzl2				-1.57933				1
Pyhin1				1.12612	-1.57566			2
Fam65b				1.52106	-1.57265		-0.630106	3
Fam129c				1.22583	-1.57259			2
Hvcn1				1.29607	-1.57253			2
Slc2a6				1.1354	-1.56703			2
Arxes1		-0.769486		-1.56651				2
Nr4a2		-1.56483					-1.47873	2
Traf3ip3			0.818756	1.44849	-1.56278			3
Vnn1		1.25073	-1.56235	-1.29679				3
Gm14137					-1.56147			1
Clcf1				1.46541	-1.56096			2
Fam117a	0.693259	-1.55931						2
Rcor2		-1.55742						1
Ikzf3				1.85785	-1.55736			2
Nsdhl		-1.5528	-0.915759	-1.12544				3
Fam195a				-1.55273				1
Ly9		1.50561	0.623793	1.19298	-1.54628			4
Slc7a11				1.25196	-1.54578			2
Coro1a		0.812777		1.30121	-1.54312			3
Cd5				1.58508	-1.53882			2
Orm3	-0.775625	-1.5376		-0.987811				3
Cables1		-1.53554		-0.624051				2
Shb		-1.53289		-0.752204				2
Arhgap25		1.0397		1.30049	-1.53039			3
Slc25a20		-1.09944		-1.52932				2
Lrrk2				0.61439	-1.52824			2
Alox15			-0.732032				-1.52793	2
Plekhg6		3.8475	-1.52433	-1.2042				3
Dusp14		-1.52387			-1.2321			2
Plin2		-1.40119		-1.51968				2
Pcdh15				1.99356	-1.51962			2
Treh	-1.51811							1
Satb1				1.30361	-1.51569			2
Wdfy4		0.723526		1.48668	-1.51503			3
Gm12250	0.780474	-1.51425						2
Stac2				0.92659	-1.50927			2
Pgam2			-1.50775	-0.995275				2
Ptplb		-1.5056		-0.850966				2
Fmnl1	0.877601			1.32796	-1.50533			3
Calml3				-1.50529				1
Sult5a1	-1.50363		0.634295					2
Col15a1	-1.50217							1
Pmepa1		-1.49619	-0.938076	-1.3123				3
2010003K11Rik		-1.38274	-0.958428	-1.49617				3
5930403L14Rik		0.616245		-1.49539			-0.632119	3
Ubxn11		0.856652		1.28149	-1.49485			3
Tlcd2	-0.769522	-0.945172	-1.22978	-1.49341			-0.712796	5
Cd53				1.04111	-1.49182		-0.621814	3
Prkcb		0.683973		1.33335	-1.49148			3
Fgd4		-1.4903	-0.763873	-0.769167				3
Pmvk		-1.49004	-0.661026	-0.915797				3
9930111J21Rik1			-1.16087	0.911447	-1.48831			3
Tmem86b		-1.48817		0.636834				2
Accsl				-1.4878				1
Wdr73		-1.48757						1
Myo1g		0.834138		1.27398	-1.4875			3
Gpd2	-0.775908	-1.09221	-0.939925	-1.48555				4
Bmpr2			-1.48534	-0.645309				2
Dagla		-1.48525		-0.842645				2
Abcd3		-1.48256		-1.06983				2
Arhgdib				1.08031	-1.48228			2
Tkt		-1.20943	-1.19013	-1.48217			-1.38146	4
Acsl1		-1.35078		-1.48037				2
Cycs				-1.47956				1
Serpina3n		0.626806			-1.47698			2
4931408D14Rik		-0.98568	-1.23736	-1.3459			-1.47527	4
Map4k1				1.43188	-1.47511			2
Spib			0.791091	1.61609	-1.47365			3
Acadvl				-1.47169				1
Il16		1.48717		1.15574	-1.46816			3
Thrsp		-1.15158	-0.897014	-1.46495			-1.00556	4
Hsd17b12		-1.31771	-0.806933	-1.46441			-0.826731	4
Ppargc1a		-1.46344		-0.686628				2
Mfge8		0.941263			-1.46224			2
Ppp2r1b		-1.45988		-0.805624				2
Scd3	0.837652	-1.4587						2
Grap		1.12849		1.07859	-1.45746			3
Cyp7b1	-1.45628							1
Cmbl		-1.45551		-0.941588				2
Adamtsl2			-1.45502					1
Pnp		-1.45301						1
Itgal				1.43737	-1.45099			2
Adora1			-0.763961	-1.2708			-1.44673	3
Pdhb		-1.08735	-0.71536	-1.44484				3
4931406C07Rik		-0.765092		-1.44449				2
Scimp			0.790999	1.433	-1.44318			3
S1pr5		-1.43846						1
Kmo				1.36832	-1.43837			2
Cmah			-0.67016	1.28702	-1.43779			3
Aco2				-1.4375				1
Sgk2		-1.4368						1
Pkd1l3			-1.43655	1.61157				2
Prkar2b		-0.713963		-1.20169			-1.43619	3
Cd83				1.14941	-1.43403		-0.84437	3
Relt				1.16934	-1.43098			2
Ces2e			-1.43088					1
Ccdc125		-1.43009		0.907212				2
Egln3		-1.42798		-0.654058			-0.718542	3
Myf6				-1.42743				1
Arhgef19		-1.42578						1
Sash3				1.3082	-1.42572			2
Mef2c				1.05344	-1.42537			2
Gbp10		-1.42489	-0.886735	-0.611416			0.733267	4
Adam12		-1.41752	-0.706592	-1.16381				3
Fmnl3				1.12954	-1.41746			2
Myo5c				-1.41666				1
Rltpr			0.870776	1.50808	-1.41554			3
Cd2				1.36359	-1.41547			2
Ky				-1.41533				1
Pex16		-1.41518		-1.24425				2
Phlda1		1.58687			-1.41437			2
Abhd5		-1.41306		-0.99657				2
Zyg11a			-1.41303					1
Pepd		-1.41303		-1.16633				2
Gpx8		-1.10743		-1.4129				2
Idh3a				-1.41143				1
Tlr9				1.47448	-1.41014			2
Gprin3		1.25469	-1.40915					2
Ntrk3							-1.40867	1
Gnmt		-1.40817						1
S1pr1				0.930739	-1.40729			2
Slc25a17		-1.40603						1
Sycp3		-1.40267	-0.865493	-1.03976				3
Fuom		-0.605723		-1.40223				2
Gm9899				-1.39964				1
Gm6484	1.03817		-0.83021	-1.39795	0.682022			4
Acadl				-1.39348				1
Coq10b		-1.39194		-0.983835				2
Cd4	-1.39157		1.22452	1.48297	-1.07502			4
Sp140		0.868484		0.603699	-1.3913			3
Dock2		0.952239		1.26437	-1.39081			3
Gm6498		-1.39057						1
Ncf4		1.07498		1.12256	-1.39007			3
Rarres1	-1.38941	1.03812						2
Rbm47		-1.38868						1
Hhex		1.35384	0.931351	1.39295	-1.38836		0.650646	5
Nudt7	-0.760241	-0.904057		-1.38816				3
Col12a1	-1.38777							1
Chst10			0.65317	1.13537	-1.38739			3
Alb			-1.38705	-0.603885			-1.00765	3
Cpt2		-1.09113		-1.38493				2
Insig1	0.733983		-1.12886	-1.38449				3
Stmn4			-1.38424				-0.852357	2
Acsf2		-1.38385		-0.720359			-0.629524	3
Hr		-1.17324	-1.21135	-1.38374			-1.34899	4
Uqcrq				-1.38334				1
Rasl2-9		-1.38231						1
Pck1		-0.710734		-1.26223	1.98518		-1.3802	4
Adcy3		-1.37982		-0.715206				2
Arl4a		-1.37926		-0.937612				2
Cela1	-0.683703	-0.939457	-0.794702	-1.37588				4
Ryr1			0.739088		-1.37547			2
Acat2			-0.669005	-1.37505				2
Acap1				1.5368	-1.37413			2
Decr1				-1.37363				1
Ppp1r16b		0.70513	0.730712	1.31652	-1.37239			4
Gm5506		-1.37169						1
Hipk2		-0.938352	-1.37014	-0.693535				3
Ldhd				-1.36838				1
Egr1	-1.36589	1.37157		1.34455	-0.698857			4
Rasal3			0.612063	1.35061	-1.36495			3
Gm11648				1.86975	-1.36466			2
Cyp21a1	-1.36455							1
Tspan18		-0.90263	-0.799914	-1.36365				3
5033411D12Rik				-1.36279				1
Evi2b		1.06625		1.48659	-1.36213			3
Apoo		-0.882905		-1.36207				2
Was				1.30103	-1.36149			2
Hmha1				1.29053	-1.35894			2
Letm1	-0.612971	-1.35856		-0.984292				3
Fdps		-1.35765	-1.01841	-0.999244				3
Tbc1d10c				1.36478	-1.35616			2
Gm10638		-1.35459						1
Uqcr10				-1.35302				1
C1rl		-1.35201		-0.881543				2
Ephx2		-0.787737		-1.35145	1.35847			3
2810459M11Rik			-1.24898	-1.3508				2
Cd69				1.08225	-1.35069			2
Cd59b				-1.34971				1
Samsn1				1.47398	-1.3492			2
Gpr81		-1.34883	-0.631473	-1.3447			-1.12289	4
Lrfn3	-1.2043	-1.34791						2
Hdhd3		-1.34755		-1.14306				2
Arl5c			0.645535	1.46604	-1.34753			3
Arhgap30		0.82046		1.27638	-1.34717			3
Gpr171				0.798102	-1.34357			2
Orm1		-1.04395	-0.969566	-1.0829	-0.870755		-1.33947	5
2610318N02Rik			-1.33943	1.26509				2
Gpam		-1.33854	-0.862369	-0.695731				3
Eci1				-1.33769				1
Tmem120b		-0.622949	-0.850003	-1.33376				3
Ltc4s			-0.649195	-1.33264				2
Cox6a1				-1.33256				1
Hcls1		0.722609		0.96303	-1.3308			3
Fyb		0.827985		1.3065			-1.3308	3
Acacb		-0.919119		-1.33061				2
Rora	0.614997		-1.32978					2
Plxnc1		0.882529		1.49945	-1.32966			3
Gpx4				-1.32926				1
Tuba8				-1.32767				1
Hmgcs2		-1.32721						1
Mlf1		0.849502		-1.32694				2
Acaa2				-1.32598				1
Phyhip		2.26013		-1.32435				2
Xpo4			-1.32221					1
Snn		1.02346		0.979441	-1.32209			3
Hadha		-0.782284		-1.32123				2
Cyfip2	1.1699	1.04599		1.68388	-1.31972			4
Sdc4		-1.31673						1
Dusp18		-1.31452		-1.13781				2
Pde3a		-1.31365						1
Fli1				1.0231	-1.31333			2
Col7a1		-1.31289						1
Rfx2		-1.31258						1
Ube2cbp		-1.31215		0.814695	0.702887			3
Agap2	-1.3083	0.984702	0.608315	1.38574	-0.891981			5
Dnajc15				-1.30748				1
Dlat		-0.790705		-1.3061				2
Fcho1				1.50275	-1.30589			2
Lnpep			-1.30474					1
Immp2l				-1.30348				1
Ipcef1				1.32232	-1.30261			2
Bysl		-1.30213						1
Cyp4f18				1.40606	-1.30099			2
B3gnt5			0.804814	1.60831	-1.29992			3
Cd52		0.821674	0.647721	1.18117	-1.29991			4
Pced1b		0.866383		1.19365	-1.29905		1.00314	4
Car14		-1.29859						1
Fermt3		0.790341		1.16796	-1.29833		-0.637291	4
Icam1				0.848407	-1.29686			2
Rcl1		-1.29524						1
Pmm1		-1.29245		-1.22232				2
Retsat		-0.855722		-1.29241	0.717287			3
Myl6b		-1.2917		-1.0533				2
Abca12					-1.29066			1
Myl1				-1.29051				1
Gpd1	-0.63283	-0.911224		-1.28621				3
Cd6				1.50448	-1.28448			2
Hyal1		-1.28301						1
Ppp1r14c				-1.28299				1
Pcyt2		-1.28214						1
Mtfp1				-1.28211				1
Hsd11b1		-1.2813		-1.20862				2
Klhl11			-1.28092					1
Gcnt1		0.978476		1.39972	-1.27981			3
Uck1	-0.686603	-1.06203	-0.714259	-1.27978				4
Cox6c				-1.27974				1
Krt84					-1.2796			1
Slc22a15		-1.27956						1
Themis2		0.814319		0.997179	-1.27953			3
Adipor2		-0.753297	-0.667732	-1.27681				3
Ces2c	-1.2764							1
Ndufa4				-1.27636				1
Bin2		1.42725		1.35314	-1.2763			3
Eif2c2			-1.27571					1
Pydc3				1.19403	-1.27255			2
Adra1a		-1.27252		-1.23392				2
Sfxn5		-1.2724		-0.886083				2
Isyna1		-1.27232		0.609674			-0.642294	3
Aldh1a7		-1.27177	-0.643836	-1.21629			-1.22787	4
Fscn1		1.67353		1.10251	-1.27124			3
AI317395		-1.11292		-1.27021				2
Atp1a3		-0.762376	-1.03992	-1.27019			-0.793703	4
Tusc5				-1.26927	-0.712523		-0.941689	3
Tmem200b		-1.26924	0.684461	0.70799				3
Dhrs7b				-1.26913				1
Ociad2		-0.838763		-1.2682	0.746614			3
Nrg4				-1.26707			-0.9716	2
Acbd4		-1.02893	-0.668409	-1.26463				3
Irf4		-0.720986			-1.26224			2
Trim67			-1.25951	-1.17872				2
Ncf1		0.889542		0.860337	-1.25883			3
Ndufa1				-1.25808				1
Laptm5		0.731469		1.05058	-1.25731			3
Asb5				-1.25708				1
Lurap1		-0.870802		-1.25664				2
Dnajb3		-1.25646		-0.923969				2
Spata17		-1.25533						1
Grap2			0.780184	1.70692	-1.25484			3
Rreb1		-1.25442						1
Mib1			-1.2541					1
G6pdx		-1.25375	-0.684454	-1.0269			-0.728934	4
Gsc				-1.25306				1
Tagap				1.24226	-1.2522			2
Limd2		0.679149		1.35213	-1.25089			3
Egr3		2.38728		1.20901	-1.25035			3
AI504432				1.60368	-1.24976			2
Lmbrd2			-1.24852					1
Cd72		1.14653		1.66218	-1.24778			3
Acadm				-1.2477				1
Ppil1		-1.24672						1
Rcsd1		0.865716		1.10443	-1.24436			3
Aspa				-1.24432				1
Plin1				-0.678519			-1.24428	2
Has1			-1.24358	-0.782852				2
Pygl		-1.24321		-1.16714			-0.978177	3
Vat1l		-1.21474	-0.704116	-1.24295				3
Tnfrsf12a		0.963876		-1.24235	-0.699745			3
Ndufb9				-1.24052				1
Slc52a2		-1.24023						1
Xkrx				1.40351	-1.2382			2
Tmem56		-0.796228		-1.23736				2
Gga2					-1.23719			1
44440					-1.23624			1
Fabp4				-1.23581			-0.616225	2
Ppp1r3a				-1.23471				1
Mapk11		1.09039		1.3481	-1.23368			3
Cox7b				-1.23281				1
A530053G22Rik		-0.690447		-1.23126				2
Lpxn				1.17009	-1.23103			2
Chst13			-1.11767	-1.23078				2
Ndufa12				-1.22997				1
Idi1		-1.22977						1
Sdf2l1	-1.22973	0.878162						2
Fsd2				-1.22957				1
Nap1l5		-1.22819						1
Tob1				-1.22742				1
Sucla2				-1.22683				1
Rgs19					-1.22392			1
Cd84		1.55642		1.10779	-1.22359			3
Upp1					-1.22285			1
Rac2		0.919727		1.33609	-1.22225			3
1110008P14Rik	-0.802649	-0.707783		-1.22184				3
Slc30a2				-1.22086			-0.6649	2
1700037H04Rik		-1.00897		-1.22016				2
Spaca1		-1.21938						1
Chpt1		-0.916437		-1.21845				2
Nckap1l		1.02102		1.14206	-1.21677			3
1700029I15Rik		-1.21653		-0.880722				2
Icam2				0.674628	-1.21625			2
Adrb2		2.21731			-1.21549			2
Nudt12				-1.2154				1
Uqcrb				-1.21239				1
Lgals2			0.756444	-1.21222				2
Etfdh		-0.924823		-1.21198				2
Klb		-1.21122	-0.649828	-1.03424				3
Slmo2		-1.21088		-0.749549				2
Acox1		-1.21015		-0.968695				2
Sipa1				1.13151	-1.21004			2
Akna				1.06518	-1.20989			2
Atp6v0a2		-1.20865						1
Elk4			-1.20835	0.960849				2
Pik3r3	-1.20809							1
Tspan32				1.40491	-1.20784			2
Ndufb8				-1.20649				1
Crat		-0.779781		-1.20635				2
Il2rg		0.931254		1.21562	-1.20553			3
Acta1			-1.2022	-0.760744				2
Pnpla3	1.8596	-1.08741	-0.745889	-0.769498	-0.916551		-1.2008	6
Cox7a2				-1.19795				1
Myoz1				-1.19745				1
Lcp1		1.04422		1.10029	-1.19642			3
Elovl5		-1.19602		-0.621918				2
Mfng					-1.19521			1
2610018G03Rik				1.40779	-1.19418			2
Slc13a3	-1.19275							1
Slc38a4				-1.19091				1
Pfkfb3	-0.835787	-0.797063	-0.860147	-1.19004	-0.714412			5
Arxes2		-1.12486		-1.18932				2
Map3k13	-1.18909							1
Ffar1					-1.1884			1
Ndufb6				-1.18821				1
Atg4d		-1.18732						1
Hist2h3c2			-0.672882	-1.18711				2
Gp1bb				-1.18474				1
Adig				-1.18427				1
Chi3l3			-1.18354	-1.02095				2
Hmga2-ps1		0.865276	0.688706				-1.18204	3
Cox5a				-1.18197				1
Plek		1.00426		1.11227	-1.18001			3
Ndufs4				-1.17984				1
Pcx		-0.625342	-0.721194	-1.1798				3
Adrb3		-1.17977						1
Gsta4		-0.690822		-1.17957				2
Angptl1			-0.671242	-1.17692				2
Nfkbid		1.13012		1.36692	-1.17563			3
Mbd4		1.50765	0.667642	1.67072	-1.1755			4
Ndufb4				-1.17447				1
Mylpf			0.928452	-1.17438				2
Otub2					-1.17381			1
Myh7		-1.1738						1
Ptpn4			-1.17367	-1.01866				2
Taldo1		-1.17227		-1.0975				2
Hist1h4h			-0.860419	-1.17183				2
Il22ra2				0.961887	-1.16918			2
Orm2	-0.992276	-0.908548	-0.900903	-1.16894				4
Ngp			-1.16763					1
Cisd1				-1.16718				1
Apold1		1.2367		0.74351			-1.16668	3
Slc22a3							-1.16626	1
Usmg5				-1.16529				1
Rmdn3		-1.16481		-0.94532				2
Klhl30			-1.16447					1
Arhgap4				1.3867	-1.16367			2
Irf5		1.28994		1.08991	-1.1628			3
B230208H11Rik				-1.16217				1
Fam81a	-1.16214							1
G3bp2		-1.16148						1
Klhl25		-1.16083						1
Neto2							-1.15974	1
Lrrc33		1.01072		0.755007	-1.15967			3
Ndufab1				-1.15965				1
Mgll		-1.15946		-0.846756				2
Aldh3b2		-1.15875		-0.965965				2
Ddo				-1.15825				1
Hexim1		-1.15797						1
Plaur		1.29442		0.998158	-1.15785			3
Vwa8		-1.15743		-0.988271				2
Fam213a				-1.15678	2.21347			2
Apoc2			-0.699249	-1.15647	1.67307			3
Cacna1g				-1.15629				1
Cyp3a44					-1.15569			1
Chdh				-0.769821			-1.15407	2
Tinag		-1.1538						1
Cxcr3					-1.15227			1
Mtch2		-0.813435		-1.1522				2
Slc5a6				-1.15149				1
Traf1		0.890803		1.34431	-1.151			3
Acad11		-0.847051		-1.14851				2
Pim1		-1.14847						1
Bcl2a1d				1.435	-1.14843			2
Naa30		-1.14777						1
Plk3	0.93179			0.825783	-1.14683		-0.610922	4
Cyb5b		-1.14635		-0.861129				2
Tpd52l1				-1.14603				1
AI662270		0.929831		0.957863	-1.14517			3
Ptprc				1.42176	-1.14493			2
Colq				1.72713	-1.14492			2
Sorcs2				-1.14476				1
Dyrk1b		-1.14453		-0.623815				2
Tmem79			-0.755083	-1.1441				2
Uqcr11				-1.14345				1
Ly86		1.03506		0.677935	-1.14283			3
Dgat2				-1.14172				1
Reep6		-1.14161		-0.998596				2
Pcsk4		-0.617987		-1.141				2
Acot2	0.861448	-1.14075						2
Cdc25a		-1.14014						1
Coq9				-1.13997				1
Ptgis		-1.13984						1
Adap1		-1.1397						1
Hadh				-1.13952				1
Crls1		-0.763921		-1.13874				2
Gpr132		0.882143		1.42537	-1.13842			3
Ffar2		-0.731136		-1.13807				2
Icos				1.559	-1.13788			2
Ropn1l		-1.13621		-0.895644				2
Tigit					-1.13578			1
Cox19		-1.03833		-1.13536				2
Gde1		-0.961406		-1.13504				2
Areg					-1.135			1
Poln		-1.07536		-1.1349				2
Piezo1		-1.13432						1
Bola3				-1.13431				1
Psph		-1.1338		-0.717249				2
Chn1				-1.13371				1
Pdha1		-0.623412		-1.1335				2
Ptpn7				1.30171	-1.13219			2
Trib1		-1.13117			-0.771131			2
Gja1		-1.13102		-0.90087				2
Hist1h1e		-0.746242	-1.13074	-0.993702				3
Rasgrp2				1.0417	-1.13021			2
Ptgds	-1.13007							1
Ets1				1.34194	-1.13			2
Pfkl		-0.872061	-0.645401	-1.12855				3
Bcl3	-0.602271	-1.12836		0.73481				3
Sdsl				-1.12779				1
Angptl3		-0.803641	-0.805082	-1.12733				3
Hmgcs1		-1.0424	-1.12696	-0.792274				3
Ndufv2				-1.12694				1
Vcam1			0.680618	0.885136	-1.12668			3
Arhgef6				0.617185	-1.12619			2
Ppp1r3c	0.808817			-1.12607	0.714688		-0.698852	4
Cyc1				-1.12585				1
Rftn1				1.18997	-1.12517			2
Slc26a10		-1.12335	0.893477	0.994244				3
Bag2	0.912332	-1.12329		-0.942128				3
Ptges		-0.791812	-0.839465	-1.12276				3
Btbd11		1.4873	0.766282	1.12515	-1.1226			4
Fam25c	-1.12227							1
Clcn5		-0.928463	-1.12199					2
Pafah2		-1.12041						1
Xrn1			-1.11949					1
Calr3				-1.11887				1
Dgat1		-0.988757		-1.1187				2
Epb4.1l4b		-1.11831						1
Aldoa		-0.878636		-1.11748				2
Tgoln1		-1.11721		-0.89163				2
Pex14		-1.11694		-0.958377				2
Tcf7	0.714237			1.53377	-1.11599			3
Gldc				-1.11585				1
Apbb1ip		0.910661		1.09727	-1.11575			3
Pik3cd				1.31926	-1.11544			2
Etfb				-1.11395				1
Coq3		-1.0572		-1.11332				2
Sh3pxd2a		-1.11252						1
Abhd6		-1.11199		-0.854542				2
Timm22		-1.11178						1
Gnat2	-1.11103							1
Pdpr			-1.11081					1
Cdsn		1.51626					-1.10967	2
Sox6			-0.672344	-1.10874				2
Gm14492				-1.10865				1
Cpne8	-1.10764							1
Dmkn				-1.1066				1
Ldha		-0.918963	-0.700773	-1.10635				3
Sucnr1				-1.10606				1
Heatr3		-1.10547						1
Il27ra				1.42533	-1.10487			2
Tst		-1.10417		-1.02087				2
Atp5j2				-1.10369				1
Acn9		-0.666965		-1.10223				2
Hivep3					-1.10212			1
Fzd9				-1.10208				1
Gpr18				1.51783	-1.1016			2
Ms4a4b				1.36121	-1.10029			2
Zfp9	-1.09966	1.46386						2
Sema4d		0.850784	0.814818	1.46523	-1.09875			4
Sod2				-1.09785				1
Kcnk2		-1.09766						1
F2r	-1.09683	0.999631		1.12918				3
Rilpl2		-1.09644						1
Rgs14				1.22538	-1.09571			2
B430010I23Rik		-0.956337		-1.09557				2
Tmem173		0.842239		0.893531	-1.09496			3
Fitm2				-1.09442				1
Cib2	-0.704882			-1.09405				2
Akap1				-1.09398				1
Cybb		1.02595		0.933211	-1.09385			3
Cib3	-1.09308							1
Fam217a		-0.78024		-1.09267				2
Clstn2			-1.09194	-0.677742				2
Acat1				-1.09187				1
Lrrc27			-0.806302	-1.09134				2
Kcnab2		0.755051		1.18531	-1.09005			3
Slc25a35				-1.0889				1
Tssc1		-1.08842						1
Inpp5d		0.818804		1.31076	-1.08693			3
Fgd2		0.636652		1.05104	-1.08613			3
Cish	1.25137	1.64408	-1.08605					3
Ptges2		-0.633913		-1.08558				2
Tnfrsf9			0.728942	1.37629	-1.08495			3
Wipi2		-1.08466						1
Traf4		-1.08443						1
Tppp			-0.644694	-1.08411				2
Cyb5rl		-1.08393						1
Xrcc3		-1.08378		-0.729289				2
C3		-1.08378			-0.67121			2
Pfkp		-1.08365						1
Sh3kbp1					-1.08336			1
Nudt18				-1.08324				1
B4galnt3	-1.08317							1
Trpv1			-0.986411	-1.08224				2
Suclg1				-1.08154				1
Pth1r		-0.927536		-1.08134			-0.78105	3
Sesn2		-1.08124						1
Sprr1a					-1.08099			1
4933412E12Rik		0.915499		0.668796	-1.08087			3
Ndufb3				-1.08085				1
Sfxn1		-1.08043		-0.841705			-0.620581	3
1810011H11Rik		-1.07874						1
Ptar1		-0.735893	-1.078					2
Cd1d1		-0.887174					-1.07766	2
Cox5b				-1.07726				1
Ncan		-1.07671	-0.956711	-0.759862				3
Tmem37		-1.07507						1
Lrp3		-1.07507	-0.637591	-0.941579				3
Itprip				1.17725	-1.07463			2
Comt			-0.683393	-1.07418				2
Ptp4a3		0.656347		0.969426	-1.07415			3
Setbp1		-1.07382		0.756991				2
Ptch2		-1.0737						1
Mki67		2.47411		1.34782			-1.07293	3
Serpina3g		-1.07229		0.864704	-0.915328			3
Gtf2ird1		-1.07218		-0.612665				2
C530008M17Rik			-1.07167	1.28102				2
Traf5		1.05593		0.982719	-1.07133			3
Runx3				1.21417	-1.07132			2
Katnal2		-0.667321		-1.07113				2
Akirin1		-1.07071						1
Dennd4b				0.949266	-1.07066			2
Itga4				1.35298	-1.07058			2
Mcts2		-0.92591	-0.600285	-1.07036				3
Pygm				-1.07024				1
Cd40		0.694938		1.13931	-1.07021			3
Fhl3		1.32045			-1.07008			2
Postn				-1.07003				1
Rtkn2				-1.06926				1
Pemt				-1.06829				1
Atp1a2			-0.70864	-1.06785				2
2010107E04Rik				-1.06702				1
Eppk1		1.9017	-0.733099	-1.06699				3
Pstpip1			0.621741	1.03557	-1.06668			3
Rpe		-1.06646						1
Higd1a	-0.641985	-0.757133		-1.06646				3
Tpm1		0.657582		-1.06604				2
Uqcrfs1				-1.0654				1
Dennd4a				0.622648	-1.06463			2
Gbe1				-1.06441				1
Fam167a		2.10219		0.649458	-1.06414			3
Actn3			0.719847	-1.063		-0.616234		3
Stx11				1.24153	-1.0624			2
Cox8a				-1.06203				1
Ckm				-1.06173				1
Smox				-1.06157			-0.877645	2
Klf2				0.78715	-1.06137		-0.64616	3
Fgd3				1.35262	-1.06095			2
Gstm5				-1.06062				1
1810065E05Rik					-1.0604			1
Pglyrp2				1.30409	-1.05963			2
Mdh1				-1.05937				1
Slc6a19		-1.0588						1
Sephs2		-0.662336		-1.05773				2
Rfx4	-1.0572							1
A430078G23Rik				1.48481	-1.05691			2
Scn1b				-1.05688				1
Loxl1		-1.05685			-0.715898			2
Dhrs7		-1.05673		-0.968306				2
Cox6b1				-1.05654				1
Hist2h3c1		-1.05595		-0.672854				2
Ide	-0.614228	-1.05542	-0.688785	-0.931678				4
Ndufb2				-1.05454				1
Fgf9		-1.05388						1
Acads				-1.05383				1
Ldhb				-1.05347				1
Pacsin1				1.87287	-1.05299			2
Dhrs7c				-1.05284				1
Lctl		0.785003		-1.0528				2
Igfals		-1.05275						1
Ppp1r3b				-0.750451			-1.05181	2
Lax1			0.802371	1.61789	-1.05084			3
Tmem45b		1.40634		-0.963581			-1.05083	3
Cntnap1		-1.0505						1
Dbi		-1.05014		-1.01049				2
Cthrc1				-1.05013				1
Cspg4		-0.831946		-1.0498				2
Gm9895		-0.826042	-0.658265	-1.04971				3
2310010M20Rik				-1.04819				1
Mlycd		-1.04807		-0.977889				2
Gm11837		-0.802272		-1.04644				2
Xpnpep3		-1.04634						1
Vsig4			-0.886616	-1.04625				2
Fam111a		0.829198		0.976538	-1.04603			3
Ndufs6				-1.04588				1
Grpel1		-0.888611		-1.0458				2
Ndufc1				-1.04472				1
Acyp2		-0.651835		-1.04439				2
2210408F21Rik				-1.04437				1
Cd48		0.9482		0.850641	-1.04405			3
Ctsd			-0.80728	-1.044				2
Slc43a2		-1.04382						1
Fbxo36				-1.04309				1
Ddt		-1.043		-0.976623				2
D930015E06Rik				1.16609	-1.04269			2
Calhm2				0.630612	-1.04264			2
Mgst3	0.997646			-1.04252				2
Otud3		-1.04242						1
Flt3			1.33063	1.5815	-1.0423			3
Cfp					-1.04211			1
Dennd1c		0.899613		1.44823	-1.0421			3
Lrtm1				-1.04199				1
Snx29	-1.04186							1
4930452B06Rik	-1.04123							1
Nfkbie				1.08084	-1.0407			2
Tmod4				-1.03961				1
Pde3b				-0.648662			-1.03929	2
Fabp5			-0.820488	-1.03902				2
Dock8		-1.03894		1.18812				2
H2-Q5	0.715926	0.925909	0.616316	1.23192	-1.03891			5
Gpsm3		0.694685		1.00246	-1.03855			3
AI467606				1.11589	-1.03838			2
Nt5dc1		-1.03816						1
Trim54				-1.03799				1
Fah		-1.03763		-0.984718				2
Msn				0.680456	-1.03727			2
1110018G07Rik		-1.03717						1
Megf6				1.59175	-1.03593			2
Cdr2		0.60422	-0.714896	-1.03577	0.770892			4
Mmp19		-1.03501		-0.878997				2
Pla2g4c				0.657025	-1.03448			2
Ccdc18		-1.0342		1.87907				2
Tlcd1		-1.03367		-0.972188			-0.746015	3
1300015D01Rik		-1.03363						1
Rxrg		-0.684964		-1.03303				2
Slc35b4		-1.03295						1
Pvalb				-1.03285				1
Gbp11	0.610354	-0.995563	-0.698787	-1.03187				4
Rasal1			1.24641	1.80505	-1.03169			3
Sh3bp5		1.06097		0.663006	-1.03144			3
Impa2		-1.03119		-0.818372				2
Slc25a45	-1.03072			0.765467	1.21047			3
Tfcp2l1				-1.03008				1
Rassf5				1.31196	-1.02996			2
Fhdc1		-1.02861			-0.814386			2
1110008F13Rik		-0.722809		-1.02759				2
Fam126b		-0.683348	-1.02469	-1.02641				3
Etfa				-1.02509				1
Nlrc3				1.34801	-1.02484			2
Ints2		-1.02484						1
Ifi27l1				-1.02478				1
Lilra5	-1.02427							1
Rab27b				-1.02425				1
Cox7c				-1.02375				1
Clybl				-1.02373				1
Cox11		-1.0237						1
Lrp8			-1.02322	1.26937	-0.978323			3
Acsl3	0.652635	-1.02312						2
Itgb2		1.03667		0.954382	-1.0227		-0.691607	4
Trpv3					-1.02258			1
Prg4		-1.02248	-0.727453	-0.602861				3
Slc27a1		-0.700997		-1.0218				2
Smad6				-1.02096				1
Gm4285		-1.0209						1
Synpo2			-1.02072					1
Gjb4					-1.01993			1
Itpk1		-1.01937		-0.689991				2
Atp5o				-1.01936				1
Slc9a2				-1.01933				1
Hsp90aa1	-0.73739	-1.01927					-0.652337	3
Tecr		-0.62475	-0.646899	-1.01919				3
Itpka				-1.01914				1
Fgf21	-1.01904							1
Sla		0.77405		1.22915	-1.0185			3
Klhl31				-1.01834				1
Pex5		-1.01825		-0.762792				2
Sp110				1.21757	-1.01824			2
Ppa1				-1.01782				1
Lmo2		0.650947		1.00174	-1.01776			3
Arhgap15				1.23082	-1.01757			2
Utp14b		-1.01709					-0.92352	2
Pde4d		-1.01696						1
Mecr				-1.01682				1
Nav3			-1.01666					1
Hexim2		-1.01534		-0.683476				2
Acp5		-0.842614	-0.812553	-1.01511			-0.965583	4
Chchd3				-1.01391				1
Cgrrf1		-1.01383		-0.900502				2
Atp5b				-1.01336				1
Sgms2			-0.81326	-1.01258				2
Asb10		0.724401	1.33923	-1.01256				3
Asns	-1.01249			-0.798315			-0.860639	3
Gstp2				-1.01237				1
Map4k2				1.20971	-1.01189			2
Slc16a1		-0.64912	-0.674978	-1.01181				3
Pdhx		-1.01179		-1.0106				2
Creb5			-1.01125					1
Rom1		-1.01111						1
Timm23		-0.655691		-1.0109				2
Dfna5			-1.01087	-0.737297				2
Bscl2		-1.01033		-0.849419				2
Glrx5				-1.00991				1
S100a1				-1.00972				1
Srgn				0.815386	-1.00955			2
5830416P10Rik				1.72326	-1.00926			2
Ppp2r5a		-0.974625		-1.00786				2
Hsd17b4				-1.00737				1
Hsph1	-0.639931	-0.715968		-0.642784	-1.00719			4
Pyurf		-0.625948		-1.00671				2
Slc25a22		-1.00653		-0.766366				2
Ndufa10				-1.00518				1
Ric3		-1.00497						1
Ak4				-1.00448				1
Spp1			-1.00417	0.751701				2
Angptl4	-0.970668	1.14075		-1.00407				3
Orai3		-1.00376						1
Acss3		-1.00347		-0.677574				2
Ormdl3				-1.00276				1
Tnni2			1.14696	-1.00197				2
Ugt2b38	-1.00178							1
Gnao1		-0.609457		-1.00176				2
Mme			-1.00173	-0.896062	0.690884			3
D5Ertd579e			-0.700131	-1.00141				2
Dock10				1.06128	-1.00122			2
Gm6277		-1.00093		-0.670061				2
Grhl1					-1.0009			1
Slc25a10		-0.663014		-0.97641			-1.00069	3
Nos3				-1.00008				1
Mogat2			-1.00005	-0.905935				2
Dld		-0.701095		-1.00003				2
Ccnt1			-1.00002					1
Pank3		-0.999561		-0.805132				2
Igtp		-0.999393						1
Sowahc				-0.999268			-0.611447	2
Rnf217		-0.999261		-0.749198				2
Gbp6		-0.861953			-0.998778			2
Stk16		-0.998344						1
Lclat1		-0.997986						1
Gimap6		0.749475		1.19139	-0.997416			3
Slc25a39				-0.997128				1
Upk1a					-0.996766			1
Mrpl12				-0.99651				1
Ndufa5				-0.996244				1
Apex2		-0.995126						1
Pnpla2				-0.995017				1
BC005561			-0.994869					1
Oaf		-0.981625		-0.99466				2
Tnnc2			0.921453	-0.994352				2
Chchd2				-0.994039				1
Lrp11	-0.993473							1
Hspb8		-0.993442		-0.86205				2
Pde12		-0.993093						1
Lss		-0.992496	-0.834888	-0.865484				3
Hk2		-0.845572		-0.913362	-0.992312			3
Cox4i1				-0.991608				1
Coasy		-0.755299		-0.990791				2
2810004N23Rik		-0.990737						1
Gm4013		-0.990097		-0.79048				2
Ccl8			0.915547	-0.733829			-0.989746	3
Uqcrc2				-0.988956				1
Tnfrsf13b			0.819778	1.53909	-0.988561			3
Fgfr2		-0.988379						1
Agl				-0.987305				1
Cpeb4			-0.987305					1
Pex13		-0.674786		-0.987022				2
Gm53					-0.986795			1
Fmod		1.40981		1.58634	-0.986495			3
Fbln7		0.766756		-0.986408				2
Slamf7		0.681705		1.3513	-0.985844			3
Atp10d				0.841057	-0.98577			2
Slc37a2		1.20963			-0.985675			2
Gnal		0.734767		-0.985459				2
Me3		0.60792		-0.98545				2
Recql4			-0.984452					1
Sdha				-0.984215				1
Trip11			-0.984101					1
Rasl12				-0.98394				1
Spats2		-0.983255						1
Pvt1	-0.983028							1
Lmod3				-0.98291				1
Cdc34		-0.982852		-0.701909				2
Ndufa6				-0.982529				1
Fam73b				-0.982253				1
Yipf7				-0.982247				1
Itk				1.30349	-0.981929			2
Gm16119				-0.980848				1
Zfp109		-0.980094		0.644266				2
Card11			0.618185	1.54165	-0.979862		-0.856316	4
Rbpms2				-0.979613				1
Capg		1.07143			-0.979609			2
Sdhb				-0.979157				1
Uqcrc1				-0.979				1
Brwd3			-0.978937					1
Atp5l				-0.978933				1
Ptdss2		-0.978676		-0.699127				2
Vldlr	2.48977			-0.977966				2
Ifi203				1.0405	-0.977705			2
Zfp185		-0.977597						1
Defa24					-0.977558			1
Apobr		-0.976802						1
Ech1				-0.976627				1
Pkm				-0.974979				1
Ces1f		-0.97493		-0.824699			-0.785926	3
Myo5a		-0.810116			-0.974556			2
Ndufa9				-0.973995				1
Ndufb5				-0.973738				1
Gapdh		-0.905101		-0.973706				2
Tfrc							-0.973234	1
Iigp1		-0.973206						1
Lst1		1.23373	0.641604		-0.972657			3
Thg1l		-0.972258						1
Heatr1		-0.971736						1
Mzb1			1.85322	1.8056	-0.971655			3
Mgst2		-0.971137	-0.751305	-0.86359				3
Shank1				1.55157	-0.970494			2
Hmox1		0.935676			-0.970482			2
Hibch				-0.969777				1
Nrip1			-0.969589					1
Phlda3				-0.969367				1
Zfp703				-0.968787				1
Nme4	-0.967832							1
Gm4951		-0.967576						1
Slc25a30	-0.966815							1
Zbtb20		-0.965851				0.648917		2
Hdac9				0.838702	-0.965379			2
Cst7				1.06939	-0.965231			2
Pla2g16				-0.965127				1
Cdk17		-0.96506		0.727598				2
Tlr1		1.5174	0.831126	1.59525	-0.964528			4
Urb1		-0.964279						1
Ndufs2				-0.964016				1
Prdx3				-0.963891				1
Gm7120		-0.963179		-0.639029				2
Ctse			1.09123	1.89382	-0.962958			3
Mpv17l				-0.962612				1
Cebpb		-0.788916		-0.962242				2
Mir5107			1.03346	1.68133	-0.962131			3
Ppp1r14a	-0.961622	0.794984	0.665343	0.822122				4
Lactb2		-0.960872		-0.889276				2
Dhcr24		-0.960846	-0.679193					2
Ndufa11				-0.960308				1
Fbxo44		-0.960143						1
St6gal1				1.31132	-0.959781			2
C8g				-0.959772				1
Slc12a2		-0.958605						1
Tnfrsf11b			-0.958477					1
Apoc1				-0.958085			-0.882	2
2022-03-05				-0.958083				1
Phf19				1.41999	-0.958056			2
Idh3g				-0.957985				1
Cdo1				-0.722831			-0.95755	2
Bckdha				-0.956982				1
Ndufaf4		-0.956205		-0.629672				2
N4bp2			-0.956005	0.773003				2
Emc6				-0.955635				1
Igf2bp2	-0.746249						-0.955155	2
Fam45a		-0.955128						1
1500011K16Rik				-0.955029				1
Smyd1			-0.667783	-0.954733				2
Pomt1		-0.954349		-0.687262				2
Spta1			-0.954197					1
Gja4			0.69702	1.06145	-0.954171			3
Hoxa4		-0.954163						1
Scd2	0.624012		-0.953858					2
Acsm3				-0.9533				1
Ndufv1				-0.952532				1
Slc6a12			-0.952453	-0.803694				2
Ptx3			0.862023	-0.952168				2
Tgfb1				0.785581	-0.952125			2
Lace1				-0.952034				1
Mrpl20		-0.952027		-0.8316				2
Dhrs4		-0.713282		-0.952002				2
Gcsh				-0.951959				1
Foxn3			-0.951789					1
Gm2083	-0.951373							1
Slc25a53				1.02617	-0.950592			2
Khdrbs3				-0.950554				1
Sdhd				-0.950382				1
Def6				1.20635	-0.950106			2
Cldn15	-0.950027	0.902723			0.620447			3
Trpc3		-0.949655	0.793112					2
Gsto2				-0.949533				1
Spag4		-0.948701						1
Negr1		-0.948336		-0.792245				2
Ptger3		-0.948067	-0.845871	-0.8604			-0.865423	4
Sh3rf2			-0.94714					1
Oplah				-0.947095				1
2300009A05Rik				-0.946907				1
Irak3					-0.946087			1
Eif5a2				0.974975	-0.946085			2
Mgst1				-0.946085				1
Sspo	-0.945092			0.817779				2
Serinc2				-0.94433				1
Dgcr6				-0.943991				1
Atf3	2.03048	1.75962	1.06954		-0.943251		-0.733712	5
Eif4e3		-0.942424		-0.718665				2
Nbeal1			-0.941507					1
Ptprz1			-0.941251					1
Hist1h1c		-0.940745		-0.722058				2
Ttc28		-0.940401						1
Creb3l3				-0.940221				1
Lypla1		-0.939977						1
Slc46a1		-0.939832		-0.885596				2
Pdk2				-0.939787				1
Il2rb		-0.939641		0.911569				2
Mdh2				-0.939469				1
Hspa9				-0.939219				1
Cyth4		0.792942		0.76469	-0.938963			3
Myom2				-0.938907				1
Echs1				-0.938848				1
Rtn4		-0.780754		-0.938106				2
Ldlr			-0.937758					1
Paox				-0.937716				1
Tmem42		-0.937527						1
Wdr91					-0.937502			1
Lpin1				-0.937				1
Homer2			-0.936997		1.64091			2
Fcgr2b					-0.93598			1
Zfp428		-0.935555						1
Kng2		0.998141	-0.934672					2
Pam16				-0.934594				1
Gm5617				-0.933129				1
Mfsd3		-0.932972		-0.883953				2
Lpcat3		-0.932555		-0.836867				2
Lipt1		-0.821117		-0.931763				2
Inca1				-0.931298				1
Socs1				0.975229	-0.931162			2
Atp5k				-0.931084				1
Pex11a			-0.730839	-0.931062				2
Glra1						-0.930912		1
Tiam2		-0.930661			-0.626635			2
Hsdl2				-0.930647				1
AK010878		-0.930385						1
Pla2g2d			1.04401	0.80721	-0.930221		-0.764133	4
Txlng		-0.930159						1
Dnajb9		-0.929883		-0.600662				2
Jph1	1.32259			-0.929709				2
Smoc1		-0.929609						1
Hist1h2bc		-0.626846		-0.929449				2
Pllp				-0.928454				1
Fh1				-0.928401				1
Ngef				-0.928169				1
Aldh1l2		1.49836		-0.927346				2
Car8		-0.927206						1
Alx4				-0.926666			-0.870472	2
Gimap8		0.705916		1.37573	-0.926618			3
Bicd1			-0.925776					1
Myrip		-0.925128	0.9157	0.940152				3
Ndufc2				-0.92491				1
Tmem245		-0.651124	-0.92466	-0.625589				3
Mrpl30				-0.924187				1
Mrpl34				-0.924186				1
Ndufv3				-0.924175				1
Fgf14		-0.924163						1
Il10ra		0.708286		1.01415	-0.923641			3
Rasgrp1				1.6823	-0.922929			2
Prss27		-0.922638			-0.804184			2
Sod1				-0.922567				1
Hspe1		-0.922258		-0.819554				2
Bhlhb9		-0.922221		-0.761581				2
Oxsm		-0.922174						1
Rassf2				0.722926	-0.922133			2
Mal				1.08759	-0.92208			2
Snca			0.870026				-0.921812	2
Garnl3		-0.921492						1
Cd300ld							-0.921276	1
Hacl1		-0.825606		-0.921129				2
Dynll1	-0.920954							1
Csf2rb2		0.704344	0.766727	1.40714	-0.92083			4
Sypl2				-0.920565	0.608724			2
Nipa2		-0.920342						1
Tnpo1			-0.920247					1
Msrb2		-0.919066		-0.888209				2
Ndufs1				-0.918786				1
Xylt1				1.2055	-0.918136			2
Ttn				-0.754408		-0.917984		2
Sccpdh				-0.917888				1
Mppe1		-0.91782		0.817983				2
Ttc30b		-0.916932		-0.627455				2
Ndufs3				-0.916886				1
Als2cr12		0.679523	-0.738205	-0.916704				3
Scp2				-0.916553				1
Mmd		-0.916492		-0.889761				2
1110032A03Rik				-0.916337				1
Pfkm				-0.91603				1
Ccl20					-0.915926			1
Adrb1				-0.915879				1
Atl2		-0.915774		-0.619082				2
1700020L24Rik				-0.915307				1
Chchd6				-0.915237				1
Serpina12	-0.915096							1
Wnk2				-0.914145				1
Aamdc				-0.913854				1
Irs3				-0.912708				1
Lipe				-0.912532				1
Cav3				-0.91244				1
Atpaf2				-0.912429				1
Hoxb9				0.700272	-0.912231			2
Pccb				-0.912068				1
Adrbk2		-0.911793						1
Timp1		1.85618		-0.911762				2
L3hypdh				-0.911627				1
Ndufb11				-0.911201				1
Trmt10c		-0.91081						1
Aco1		-0.656767		-0.910496				2
Extl1	-0.910496			1.25802	-0.600425			3
Gm14057		-0.910263						1
Coq7				-0.909925				1
Pex11c				-0.909737				1
Nr0b2					-0.909565			1
Clpb				-0.909469				1
Tiam1		-0.9092		0.77812				2
Bcl6	-0.908821		-0.861514					2
Serpinb2			-0.907843					1
Basp1		1.02238		0.737	-0.907658			3
Dolk		-0.862432		-0.907433				2
Uqcrh				-0.907105				1
Ppp3cc				0.779388	-0.906997			2
Lmna		-0.906997		-0.802361				2
Cnnm2		-0.906873		-0.869721				2
Nfam1		0.840099			-0.906764			2
Id1							-0.906619	1
Adck3		0.730448		-0.906224				2
Chst2				1.13583	-0.905858			2
Pgm2		-0.632872		-0.905554				2
Phf11b		0.715769	0.626389	0.836785	-0.905449			4
Gpr137b					-0.905225			1
Acsl6				-0.904396				1
Wfdc17		0.701986		-0.729039	-0.904277			3
Pik3cb				-0.903505				1
Dtx1				1.72701	-0.90288			2
Tmed8					-0.902444			1
Agpat6		-0.878961		-0.902368				2
Zbtb7c	-0.901768	0.818336		0.838271				3
Gm14403				-0.901239				1
Mtor		-0.900861						1
Sco1		-0.900753						1
Hspd1				-0.90002				1
Serpina9	-0.899829							1
Sfpi1		0.855388		0.679831	-0.899305			3
Mob1b		-0.895852	-0.899271					2
Cs				-0.898685				1
Exd1				-0.898466				1
Gmds	-0.898346							1
Dusp13				-0.897072				1
Cideb				-0.896536				1
Gprc5b				-0.896344				1
Mrps36				-0.896261				1
P2ry13				1.37261	-0.896217			2
Fam132a		-0.67902		-0.896184				2
Capn2		-0.89593						1
Cebpa				-0.895815			-0.719021	2
Syngr1				-0.894608				1
Aste1		-0.894256						1
Cyp2u1	-0.893561			-0.723079				2
Pgk1				-0.893223				1
Fam120aos		-0.893157						1
Pnp2		-0.892943						1
Tmem53				-0.892747				1
B930092H01Rik			-0.874441	-0.892594				2
Pex3		-0.713762		-0.892556				2
1700052K11Rik	-0.602646	-0.891175						2
Pla2g12a				-0.891135				1
Aqp11				-0.891077				1
Hint3				-0.891004				1
Gcat				-0.890801				1
Gimap7				1.234	-0.890305			2
Cad		-0.890297						1
Ndufa8				-0.889682				1
5830428M24Rik				1.95524	-0.889567			2
Aifm2				-0.889451				1
Ccdc3		1.22847		-0.889357				2
Gm20257	-0.889343							1
Slc29a4					-0.889224			1
Mrpl42				-0.889135				1
Fzd3		-0.807452	-0.661693	-0.888406				3
Tpi1				-0.888151				1
Cdh1	-0.887829			1.40644				2
Ahi1							-0.887698	1
2410015M20Rik				-0.887512				1
Ehd3		1.47553		1.1316	-0.887405			3
Slc15a3		0.80849		1.05937	-0.887286			3
1700047G03Rik			-0.886892					1
Cmya5				-0.886648				1
Lgr6		-0.886475						1
A530016L24Rik				-0.609419			-0.886422	2
Ogdh				-0.88589				1
Twist2		-0.885887		-0.86732				2
F3		0.633392		-0.885844				2
Tmem205				-0.885508				1
Acot13				-0.885324				1
Timm8b		-0.723061		-0.884877				2
Chac1		1.59571		-0.883971				2
Sh2d1b1					-0.883566			1
Eno3				-0.883449				1
Cd27				1.33178	-0.883298			2
Slc24a3				-0.88301				1
6530402F18Rik		-0.882563			-0.634229			2
Spire1		-0.882428						1
Mybph				-0.882082				1
Srl		-0.881991		-0.72178				2
Ptger4		1.43935	0.723859	0.940731	-0.881441			4
Idh3b				-0.881166				1
Rnase6				1.40734	-0.880576			2
Mcee				-0.87977				1
Trpv2				0.97703	-0.879402			2
Sh2d3c		0.874185		1.07262	-0.879362			3
Lrrc71						-0.879234		1
Wdfy2			-0.877803					1
B3gnt8		0.665449	0.899505	1.39399	-0.877767			4
Aacs		-0.838496		-0.877532			-0.867657	3
Snx8					-0.877517			1
Exo1			-0.877426	1.16758				2
Tlr7		0.767214		0.650259	-0.877343		-0.612751	4
Uxt				-0.877235				1
Mlx		-0.877014						1
Itga7			-0.80255	-0.876146				2
Mal2			-0.876089	-0.735611				2
Atg10				-0.876076				1
0610012G03Rik				-0.875				1
Saa1	-0.874914							1
Adcy7				1.14018	-0.8747			2
Unc13a		-0.874323						1
Slc6a13				-0.87395				1
Cacng1		1.29519		-0.873831				2
Atp5a1				-0.873697				1
Aldoart1		-0.873666						1
Cenpi			-0.872854	0.66045				2
Ankrd13d				1.03595	-0.872763			2
Megf9		-0.870171	-0.872707	-0.627246				3
Fbxl6		-0.872031						1
Apobec3		0.851992	0.634907	1.43825	-0.871645			4
Ndufs8				-0.871364				1
Romo1				-0.871354				1
Aoc2	-0.870746							1
Msantd3		-0.614592		-0.870571				2
Slc26a2			-0.870389					1
Otud1				0.755373			-0.870009	2
Srebf1	0.682187			-0.869877				2
Ggt7				1.08968			-0.86975	2
Aldoart2		-0.869699						1
Ces1d	0.750039			-0.868491				2
Mrps27		-0.86734						1
Ccl27a		-0.866831						1
Ndufa7				-0.866357				1
S1pr3		0.614661		0.774219	-0.86611			3
1110001J03Rik				-0.865715				1
Tmem70		-0.699427		-0.865594				2
Arsg		-0.865225						1
Mlf1ip			-0.865051	0.96342				2
Txnrd2				-0.864849				1
Sdhc				-0.864849				1
Ptpmt1				-0.864655				1
Bag1				-0.864473				1
4732471J01Rik		-0.864457						1
Pgp				-0.863884				1
Atp5e				-0.863522				1
Msra				-0.863181				1
Fastkd5		-0.862752						1
Notch2					-0.862573			1
Bach2		0.947975		1.74564	-0.862528			3
Cgref1				-0.862386				1
Gm20337		-0.862087						1
Apool				-0.861957				1
Anxa8		2.67681	-0.861954	-0.748168				3
St8sia4				1.03341	-0.861518			2
Mgmt				-0.861317				1
Dram1				-0.783352	-0.861266			2
Gnpat				-0.861209				1
Jagn1				-0.861043				1
Dnajc25		-0.86087		-0.698901				2
Usp16		-0.860867						1
Kcnab3		-0.860629						1
8430427H17Rik		-0.860533						1
Clpp				-0.860411				1
Pmpcb				-0.860258				1
Tlr12	-0.860105			1.2026				2
Ndufa2				-0.859853				1
E130012A19Rik				1.17135	-0.859608			2
Deb1				-0.859473				1
Cdh15				-0.859389				1
Cldn1		-0.859336	-0.844429	1.05913				3
Lad1	-0.859265			1.7112				2
Atat1		-0.859188						1
Nxpe3				1.76277	-0.859011			2
2310009B15Rik				-0.858883				1
Slc2a9		-0.858536						1
Macrod1				-0.858135				1
Lat2		0.979798	0.601908	1.35021	-0.857782			4
Adal		-0.857451						1
Mybpc3						-0.857079		1
Ttc19		-0.856625		-0.739211				2
Epb4.1l1				-0.856567				1
Tmem62		-0.85638						1
Tstd3		-0.856251						1
Gadd45g	2.86204	-0.855833						2
Slc25a33		-0.740997		-0.854876				2
Igsf21		-0.854392						1
9330159M07Rik	0.700468			-0.854154				2
Txndc11		-0.853831						1
Itga10	-0.681882						-0.852723	2
Mycbp		-0.852102		-0.677912				2
Uprt			-0.851845					1
Stradb				-0.851541				1
BC022687		-0.851511						1
Enpp2					-0.851082			1
Armc2					-0.851078			1
Acot8		-0.850649						1
Gm561				-0.850548				1
Ttyh1							-0.850088	1
Usp13				-0.849541				1
Timm8a1		-0.849311						1
Srcrb4d				-0.849272				1
Rbm24				-0.848915				1
Tmem147		-0.848787		-0.791854				2
Cnn2				1.13239	-0.848151			2
Letmd1		-0.848114						1
Slirp				-0.847655				1
Tbc1d2				-0.847612				1
Uros		-0.847154						1
Slc26a6	-0.847146							1
Rab34	-0.606265			-0.847093				2
Rnf11		-0.613605		-0.846262				2
Slc25a44				-0.846172				1
Smpd3	-0.845453							1
Tmem143				-0.84534				1
Rpl7l1		-0.844926						1
Lama3	-0.843878			1.14657				2
44258		-0.843756			-0.644375			2
Nsun3		-0.843504						1
Fst	0.792226	-0.843461						2
Cbr4				-0.843115				1
Oscp1				-0.842883				1
Engase		-0.842784						1
Ccr10		-0.842683						1
Pon3				-0.842513				1
Phyh				-0.842505				1
Spa17				-0.842271	0.884541			2
Errfi1					-0.781251		-0.841115	2
Abhd15		-0.841097		-0.744767				2
Atp13a3		-0.840829						1
Endog				-0.84082				1
Cd209d							-0.840682	1
Pik3ap1		1.9329		1.23697	-0.840054			3
Atp5f1				-0.839644				1
Pgam1		-0.60058		-0.839512				2
Chst11				-0.838737				1
Adm		2.06834	0.850268		-0.837287			3
Slc16a13	-0.837215	1.28167						2
Gys1				-0.837053				1
Chchd4				-0.836387				1
Lbh		-0.836206		1.02395				2
Myl4					-0.835636		0.68065	2
Ndufa3				-0.835594				1
Fbxo40				-0.835151				1
Smtnl2		0.721602		-0.835033				2
Cmtm4				-0.834976				1
Rsph3a				-0.83483				1
Prkd1		-0.834277						1
Lrrc59		-0.83425						1
Srxn1		-0.612083		-0.834049				2
Foxred2					-0.833846			1
P2rx6				-0.83345				1
Ap3s1				-0.83324				1
9330159F19Rik				-0.833222				1
1190005I06Rik				-0.83311				1
Depdc1b			-0.833105	1.55508				2
Dhdh				-0.832752				1
Nedd9				1.04529			-0.831582	2
Sfrp5		-0.830766						1
Ntsr2			-0.783417	-0.830533				2
Clock		-0.83041						1
Odf3l1		-0.830387		-0.817912				2
Fxyd1				-0.830257				1
Lyrm5				-0.829936				1
Car13		-0.765543		-0.829092	0.708714			3
Psmd6		-0.828994						1
Tenm4							-0.828394	1
Stx1b		-0.828331						1
Slc7a7	-0.828306	0.996145						2
Timm10		-0.677156		-0.828094				2
Spn		0.832374		1.23547	-0.82787			3
Hagh				-0.827365				1
Dusp6		-0.827351						1
Apln		-0.826912					-0.813249	2
Fbxo21				-0.826566				1
Rpgrip1				1.50156	-0.826472			2
Gm19522		-0.743115		-0.826415		0.679449		3
Fos	0.858197	0.932229		1.77908		-0.826056		4
Fam187b	-0.825613							1
Fkbp11				-0.825242	0.655463			2
Heg1			-0.825014					1
Lck			0.8674	1.32912	-0.824336			3
Rnf149		-0.824262						1
Nkain1				-0.824109				1
Ksr1		-0.823884						1
Alas2			1.01797			0.953501	-0.823867	3
Aldh9a1		-0.82364		-0.643452				2
Bcas1			-0.823324	1.30961				2
Bbc3		-0.823322						1
Derl1		-0.823001		-0.683297				2
5031439G07Rik		-0.822988						1
Fdx1				-0.822813				1
Col11a2		-0.822373		0.725692				2
Kcnk6							-0.821954	1
Oxld1				-0.821826				1
C330013E15Rik				-0.821601				1
Gimap3	0.687505		0.770353	1.34529	-0.821527			4
Unc5a				-0.821314				1
Usp2				-0.821289				1
Scamp5	-0.821105							1
Chic1	-0.820998							1
Cyp4a31	-0.820271							1
Angptl2		0.602659		-0.820213				2
Poldip2		-0.740086		-0.819868				2
Ptges3l			-0.737962	-0.819798				2
Kcnj12				-0.819612				1
Mnf1				-0.819051				1
4930523C07Rik					-0.818734			1
Trim56			-0.817993					1
Prdx1				-0.817886				1
Sar1b		-0.723416		-0.81751				2
Dnajc28				-0.817435	0.754336			2
LOC100504703				-0.817178				1
Ptgr2				-0.816721				1
Eci3				-0.816636				1
Hmbox1			-0.816371					1
Myeov2				-0.815998				1
Gtf2h5				-0.815234				1
Pdp2		-0.815155						1
Clec4d				-0.81514				1
Dusp9			-0.815131					1
Psmb5				-0.814959				1
Zfp708		-0.814415						1
Lrp2	-0.814016							1
Ftsj3		-0.81396						1
Myoz3				-0.813255				1
Sec14l4				-0.812688				1
Ndufaf5				-0.81248				1
Pard6g				-0.81196				1
Skil		-0.811869		0.864085				2
Malsu1				-0.811601				1
Tnfrsf18			0.754583	1.34324	-0.81123			3
Sqle		-0.811111						1
Ccdc66	-0.811076							1
Sod3				-0.64059	-0.811008			2
Myo18b				-0.810886				1
Ppp1r18		0.638098		0.833465	-0.810644			3
Tmem41a		-0.810176						1
Pcca		-0.618097		-0.810098				2
Srgap3		-0.810097		0.857605				2
Grhpr				-0.809692				1
Map3k8		1.37111		0.988507	-0.809542			3
Apoa4	-0.8095				2.63309			2
Mccc1		-0.699468		-0.80936				2
Kbtbd11							-0.809344	1
Map1lc3a				-0.808878				1
Sh3bgrl		-0.808662						1
Tomm70a		-0.808139						1
Trub2		-0.808102						1
Tada2b		-0.807889						1
Cdnf				-0.807841				1
H1fx					-0.807757			1
Wdr34		-0.807689						1
Adamts12			-0.783298	-0.807553				2
Lrmp		0.70567		1.53699	-0.807417			3
Chuk		-0.807366						1
Ankrd52		-0.806762						1
Alcam			-0.806639					1
E030030I06Rik	-0.806007							1
Mcpt1					-0.805762			1
Lsm1		-0.805655						1
G0s2				-0.805339				1
Hint2				-0.805207				1
Tmem11				-0.805065				1
Rmdn1				-0.804929				1
Cd302				-0.804831				1
Scarb2		-0.804631						1
Lamc3				-0.804562				1
Fam20c		2.15284			-0.804499			2
Minos1				-0.804336				1
Mir682					-0.804321			1
Dlst				-0.804182				1
Dnajb1							-0.803341	1
Gm5069		-0.803272						1
Ghitm				-0.802803				1
Gpcpd1		-0.802758						1
Arhgef37	0.759185			-0.802425				2
Ptprf							-0.802403	1
Ntrk2		-0.80233						1
Isg20					-0.802055			1
Sphk2		-0.801937						1
Adk				-0.801893				1
Atp5g3				-0.801617				1
Atp11a	-0.801156							1
Casc5			-0.801075	1.78004				2
Vcan			-0.800929					1
Slc25a19				-0.604705	-0.800911			2
Hibadh				-0.80081				1
Dpy19l4			-0.800668					1
Tmem135		-0.630491		-0.800538	0.787419			3
Fxyd3			-0.800054					1
Cmc1				-0.799953				1
Sort1	-0.799763							1
Sc5d		-0.690493	-0.742911	-0.799514				3
Polr2l				-0.799511				1
Ccdc15			-0.799382	0.889077				2
Echdc3				-0.798461				1
Gm15408				-0.798274				1
Mef2d		-0.798151						1
Tnnt1		-0.797857	1.19785					2
Retn							-0.797329	1
Psmc4		-0.796995						1
D10Jhu81e				-0.796318				1
1810021B22Rik				-0.79615				1
Bpnt1				-0.796076	0.690963			2
Eme2		-0.796025						1
Hsd3b7		-0.795862		-0.624356				2
Gpsm1		0.704515		0.745839	-0.795831			3
Pex19		-0.764843		-0.795789				2
Cd59a				-0.795562				1
Mndal		0.616601		1.12891	-0.795411			3
Wnt10b			-0.795229					1
Car15		-0.794863	0.930653	0.642585				3
Ndufa13				-0.794269				1
Erdr1							-0.794115	1
Uhrf1bp1		-0.614652		-0.794106				2
Strn			-0.794026					1
Apex1		-0.793941						1
Fgf18				-0.793542				1
Vav1				1.26612	-0.793463			2
Ptp4a1	0.64635			-0.793393				2
Mut				-0.793206				1
Gm16551	-0.793157							1
Fbxw10						-0.792976		1
Cox14				-0.792974				1
Igfbp6	-0.792959							1
Timm9		-0.79264						1
Tmem253		-0.792593						1
Tcn2		-0.792414		-0.671203				2
Rnft2							-0.792377	1
Them4		-0.79196						1
1810033B17Rik			-0.791866	0.898698				2
Atp5d				-0.791809				1
Phka1				-0.791679				1
Gimap4				1.16754	-0.791387			2
Dnajc19				-0.791288				1
Nxpe5				-0.790953				1
Lrg1				-0.790949				1
Otud6b		-0.790798						1
Fam171b					1.00286		-0.790227	2
Phb				-0.790119				1
Bcap31				-0.789813				1
Gars		-0.789336						1
Arid5a	1.12608			0.927315	-0.789262			3
Stat4				1.28931	-0.788861			2
Fam210a				-0.788838				1
Ccno		1.16093		-0.788743				2
Mrpl53				-0.788391				1
Duoxa2					-0.788203			1
Stk36		-0.788082						1
2310040G24Rik		0.774358		-0.787771				2
Trib2	-0.702022			1.12679	-0.787647			3
Tmem242				-0.787555				1
Papln					0.671897		-0.787502	2
Tmem69		-0.787318						1
Lgals1				-0.78712				1
Ldb3				-0.786923				1
Cd247		1.91581	0.9608	1.26454	-0.786907			4
Muc2		-0.786907						1
Oxnad1				-0.786673				1
Dpf1							-0.786517	1
Pdss1		-0.786312						1
Lsp1		0.618661		1.00115	-0.786092			3
Gfm1				-0.786057				1
N6amt2		-0.785961						1
Irs1		-0.785906						1
Arl2				-0.785678				1
Lsmd1				-0.785395				1
Sepsecs		-0.785057						1
Ginm1				-0.784964				1
Emc8		-0.784688						1
Sgcd		-0.758179		-0.78376				2
Slc25a51		-0.721543		-0.782971				2
Mtus1				-0.78293				1
Sh3glb1				-0.782575				1
Mtx2				-0.782535				1
Rsph3b				-0.782291				1
Mkks				-0.782191				1
C4b		0.936045			-0.782113			2
Glrx		-0.781822						1
1110028F11Rik	-0.780939							1
D430020J02Rik				1.05866	-0.780879			2
Isca1				-0.780346				1
Lipa		-0.780057						1
Fam162a				-0.779964				1
Elk3				0.787159	-0.779887			2
Gyg				-0.779783				1
Rhbg	-0.779648							1
Ms4a6b				1.1899	-0.779495		-0.710978	3
Tes	-0.779294	0.844301		1.11136			-0.768645	4
Frat1		-0.779208						1
Cox17				-0.77919				1
Timm17a				-0.779001				1
Foxo6							-0.778977	1
Spata6					-0.778956			1
Dyrk3				1.13909	-0.77877			2
Ankrd37		-0.77854		1.43664				2
Rfc5				0.696845			-0.778374	2
Prkag3			0.731478	-0.778122				2
Mrps2		-0.777895						1
Zfp872				-0.77781				1
Agpat3				-0.777726				1
Pus10		-0.777474						1
Syk				1.01277	-0.777121			2
0610009B22Rik		-0.61567		-0.776985				2
Rnf144a					-0.776285			1
Bcl2a1b				1.26084	-0.776125			2
Maff		1.40614		-0.742603	-0.775968			3
Prkaca				-0.775914				1
Sirt3				-0.775765				1
Pcdhb14		-0.7755		-0.641055				2
Lyplal1				-0.775469				1
Nr1h3		-0.712136		-0.775439				2
Mrpl55				-0.775119				1
Upk3a					-0.775042			1
Dtnbp1				-0.775035				1
Mrpl27				-0.774639				1
1700021F05Rik				-0.77457				1
Tmem38a				-0.774388				1
Cat		-0.77408		-0.637058				2
Nr4a1	2.65561		0.814705		-0.773654	-0.695071		4
Swap70		0.665671		1.47687	-0.773646			3
Lyz2		0.953249			-0.773166			2
2810408I11Rik	-0.772957			1.51643				2
Aldh1l1				-0.772791				1
Cd44		1.45955		0.847129	-0.772343			3
Spata5		-0.772259						1
Casq1				-0.77221				1
Chadl				-0.771987				1
Sesn3		0.63744	-0.771788	0.603898				3
Aldh5a1				-0.771416				1
Atp6v0a4			-0.7714					1
F5			-0.771339					1
Tmem48				-0.770735				1
Mgat4b				-0.770629				1
Lbp					-0.770526			1
Lrrc14b		1.18535		-0.770265				2
Pnpla8		-0.710059		-0.770132				2
Nudt19		-0.713487		-0.769846				2
Mrps23		-0.76981		-0.615414				2
Dnaja3				-0.769552				1
Hist1h2be				-0.76923			0.64925	2
Abca1		-0.769122			0.786369			2
Xlr3b			0.625311	0.986706			-0.768809	3
Arc		2.23131		-0.688461		-0.768749		3
Fn3k				-0.768197				1
Agpat9				-0.768125				1
Gchfr				-0.767736				1
Atp5h				-0.767336				1
Slc22a4		1.94278	-0.76721	-0.617648			-0.703345	4
Apitd1				1.2305	-0.766417			2
Nubpl				-0.766417				1
Rdh13		-0.766371						1
Evl				1.24216	-0.766321			2
Zfand6		-0.766062						1
Myom1				-0.76599				1
Kbtbd12				-0.76597				1
Jak3				0.647602	-0.765945			2
Sh2d2a				1.20779	-0.765629			2
Slc16a6	-0.765511	0.831282		1.18223				3
Cyp51			-0.765488				-0.638811	2
Celf2					-0.7654			1
Atp5j				-0.76528				1
Gm4890		-0.765267						1
Alad				-0.765195				1
H2-T24				1.16406	-0.765161			2
Osgin1	-0.765125	0.686424						2
Dot1l		-0.765113						1
Cluh		-0.636535		-0.765077				2
Abcb8				-0.765				1
Col20a1		-0.764859						1
Nrp1	-0.764672							1
Kcna1		-0.764182		0.688425				2
S100a4		1.31882			-0.764039			2
Dhx34		-0.764026						1
Elmod3		-0.764023						1
Ppm1g		-0.763992						1
Rrad		1.14696		0.778786	-0.759904		-0.763776	4
Cenpm	-0.763212			0.893951				2
Tmem100							-0.763129	1
Immt				-0.762972				1
Cidec	-0.731618			-0.762957			-0.681758	3
Kcnj14				-0.762697				1
Phgdh		2.51654			-0.762678			2
Decr2		-0.762447						1
Ints7		-0.762312						1
Frrs1		-0.762296	-0.729091					2
2022-03-03				-0.762163				1
Aldh4a1				-0.762158				1
Tnni1		-0.762057						1
Spryd7				-0.762046				1
St7l		-0.761898						1
2900008C10Rik		-0.76188						1
Mrpl16				-0.761795				1
Pno1		-0.648998		-0.761635				2
Tsku	-0.761616	0.910382			1.60983			3
Prex1				1.20408	-0.761547			2
Sh3gl3					-0.761447			1
Atp5c1				-0.761432				1
Fam149a		-0.761292		-0.639151				2
Lcor		-0.761197						1
Car5b				-0.760902			-0.653561	2
2010320M18Rik				-0.760791				1
Mrpl50		-0.760453		-0.719318				2
Ppargc1b				-0.759865				1
Cd8b1			0.996651	1.28432	-0.759769			3
Arid3a		0.742079		1.04933	-0.759454			3
Tcaim		-0.759248						1
Chrm4					-0.759084			1
[truncated: 4,337 more rows]
