# Supplementary material for: Comparative multi-tissue profiling reveals extensive tissue-specificity in transcriptome reprogramming during thermal adaptation
Source: eLife. 2022 May 17;11:e78556. doi: 10.7554/eLife.78556 (PMC9113744; doi:10.7554/eLife.78556)
Supplement: Supplementary file 4. [file elife-78556-supp4.xlsx]

## Sheet: Suplementary File 4
Gene symbol	Bone marrow	Hypothalamus	Spleen	Liver	VAT	Ileum	Spinal cord	BAT	SAT	Brain	Quadriceps	# of Tissues
Ucp1				-2.33507	-4.28448			0.870747	7.34316		8.82695	5
Acot11					-1.9285			2.02148	4.62246		1.18409	4
Fabp3									4.43206			1
Ttc25								4.23766	4.04814		3.18086	3
Cox7a1				-1.1534	-1.78548			0.610603	3.96448			4
Aspg					1.07864			1.69548	3.84881		4.90596	4
Ppp1r3b					1.04537			1.7371	3.77845		4.17694	4
Dio2								-0.963832	3.26314		0.77668	3
Tchh					1.92267				3.19776			2
Slc27a2									3.18962			1
Cpn2									2.99515			1
Cpt1b									2.97066			1
Otop1									2.88917		4.90565	2
Spata17								0.733371	2.8828			2
Mup3					2.36972			-4.43493	2.83028			3
Cidea				-2.21628	-1.78236				2.68562		4.16607	4
Rwdd2a								1.80702	2.64203			2
Gk					1.36846				2.62177			2
Tmem82									2.61548			1
Hephl1					1.84532			4.99773	2.60455			3
Cox8b				-2.31387					2.60411			2
Slc25a34								1.09219	2.59003			2
Tcp11									2.56049			1
Adcy10								3.05204	2.53797			2
Gck					2.37673			1.38612	2.52675			3
Pank1					1.00596				2.42043			2
S100b									2.42035		0.844496	2
Elovl6					2.09327			1.57045	2.37695		4.56892	4
Adprhl1								2.16847	2.33413			2
Dmbt1			0.630923						2.317			2
Sycp3								1.28633	2.31418			2
Muc3									2.25073			1
Myo5b					2.87957			0.80012	2.23191		0.883012	4
Rap1gap								1.44611	2.22014			2
Fam57b								2.25811	2.1583			2
Acaa1b						1.48597			2.15374		3.00565	3
Slc2a5								1.96797	2.13851		4.34553	3
Lypd8			-2.91928		5.74777				2.12898			3
Tinag									2.12085			1
Muc2			-2.45515						2.11408			2
Esrrg									2.08584			1
Angptl8				1.38929	1.05696			1.12451	2.08456			4
Cycs									2.02746			1
Nabp1								1.2898	2.02117			2
Impa2					1.40176			1.59129	2.019			3
Shroom1					1.08621			1.43603	1.99359			3
Cpb1									1.98968			1
Acox2								1.55304	1.95319			2
Tmem79								0.830973	1.94141		2.42426	3
Poln								0.621747	1.92065		2.81108	3
Mep1b			-2.23242						1.91336			2
Slc22a2								-1.6256	1.90441			2
Grk3									1.90222			1
BC049352								1.07806	1.89729		-0.725346	3
Mup11								-3.07553	1.89428			2
Pigr			-1.85059						1.88383			2
Rgs2					1.02001				1.88341		1.15878	3
Clec2h			-2.26896	1.55958					1.88298			3
Defa24			-2.39308						1.8488			2
Phospho1									1.84771			1
Fabp6			-2.20691			0.665625			1.84677			3
Gss									1.84361			1
Ccdc18									1.83799			1
Cxadr									1.83719			1
P2rx5									1.83585			1
Insig1				0.644562	2.36856			0.713705	1.83325		1.32566	5
Hnf4a			-2.66628		-1.28965				1.82188			3
Zg16									1.82102			1
Reg3g			-2.49511						1.82003			2
Naip1					-1.5085				1.81416			2
Vil1			-2.13024		-1.29816			0.87763	1.81316			4
Defa30			-2.25488						1.80395			2
Sec14l4									1.7988			1
A830018L16Rik									1.79581			1
Hpdl					3.4998			0.614156	1.79527			3
Myo15b			-1.16866						1.79075			2
Slc25a20									1.77653			1
Slc25a48				-0.950716				0.815723	1.77559			3
Naaladl1			-1.63651						1.77211			2
Mpc2								0.945421	1.76615			2
Pdk4				-1.52513					1.76302		-0.99243	3
Sucla2									1.75424			1
Igha									1.7537			1
6430571L13Rik								1.42711	1.75309			2
Plin5									1.75204			1
Fabp2			-2.64685			1.30798			1.73505			3
Cdhr2			-2.43336		1.21227				1.72806			3
Ace2			-2.36145		2.41626				1.7199			3
Aspa									1.71166			1
Letmd1								0.719643	1.70717		1.19325	3
BC049762									1.70411			1
Gys2					1.3331			0.811216	1.7032		3.51979	4
Mpc1								0.926811	1.69939			2
Pdhb								0.727281	1.69263			2
Chchd10					1.18413			0.63538	1.69205			3
Ndufaf4								0.850387	1.68391			2
2010003K11Rik								1.72767	1.67829			2
Gpd2									1.6729			1
Lactb2								0.688927	1.66891			2
Myo1a			-1.95866						1.6682			2
Clca1			-2.07941						1.66298			2
Cox7b									1.65608			1
Timm8a1			-0.70232						1.65268			2
A1bg									1.65009			1
Tstd3								0.81584	1.64415			2
Sis			-2.34091						1.64227			2
Itln1			-2.24287						1.64216			2
Dusp14					1.17775			1.93489	1.64019			3
Cyp51					1.65486			1.49648	1.63952		1.03592	4
Apoa1		1.47135	-2.11933			0.812691	-1.05346		1.6357			5
Fbp2								1.38086	1.63382			2
Tmem37									1.63059			1
Etfrf1									1.62549			1
Dnah10					-1.70554	0.918916			1.61878			3
Reg3b			-2.57575						1.61636			2
Mep1a									1.61472			1
Grb7					1.67407			2.67783	1.60314			3
Mtfp1			-0.632254						1.5942			2
Olfr1396								2.04098	1.58395			2
Mgam			-1.99102						1.57862			2
Cry1					0.981328	0.839805		1.32995	1.5761			4
Pim1									1.56895			1
Agpat2					1.15314			1.07458	1.56852		2.63502	4
Slc44a4					2.08419				1.56833			2
Ccdc144b								1.11186	1.56802			2
Sc5d								1.82601	1.56747			2
Mvd					1.90354			1.91695	1.55925			3
Clstn3									1.55745		2.16869	2
Fdps					1.73938			2.08719	1.5552			3
Thrsp			1.10777		1.1241	2.42503		1.23877	1.55069		2.50744	6
Slc6a19									1.54954			1
Pm20d1									1.54554		0.839758	2
Acly					2.35153			1.65244	1.54329		3.01075	4
Defa22									1.54316			1
Muc13			-1.74778						1.53674			2
Pls1			-1.06893		-1.14379				1.53397			3
Prune2								1.42957	1.53342		1.22932	3
Apoo									1.53184			1
Msmo1					1.55096			0.955672	1.52916			3
Sbk1					1.56116			1.87095	1.52882			3
Cdh17									1.52867			1
Ifi214						-1.07523			1.52727			2
Gpd1	0.686455							1.20265	1.52677			3
Usmg5									1.51726			1
Nudt7								0.711209	1.51358			2
Apob		2.22283	-2.05907					-4.13341	1.50895	1.54114		5
Me3									1.5087			1
Hrasls5									1.50615			1
Acsl5								2.01384	1.50526		1.72347	3
Pla2g2e								1.19325	1.49504			2
Trat1									1.48974			1
Recql4			-0.698389		1.38282				1.48297			3
Dld									1.47425			1
Ncan								1.41632	1.47272			2
Iglv1						-2.06023			1.46935			2
Noxred1								-0.826788	1.46672		2.06857	3
Uqcrb									1.46312			1
Abcc2	-0.613428							-0.815335	1.45936			3
Celsr3			-0.684952						1.45669			2
Acss2					1.96356			0.905793	1.456		0.623453	4
Mlxipl								0.907929	1.45424			2
Hadhb									1.45301			1
Mid1ip1				0.611502	1.77342			1.63455	1.45135			4
Apoc2						1.11828			1.44879			2
Hebp2					2.68755			1.13943	1.44823			3
Slc15a1									1.44657			1
Adamdec1									1.4436			1
Hist1h2ad			-1.32818			1.02684			1.43342			3
Slc13a1		0.92077							1.43252			2
Tlcd2								1.14032	1.4315		0.823132	3
Pfkl								1.78552	1.4314		1.51591	3
Tex15									1.42651			1
Acaa2									1.42626			1
Xrcc6									1.42352			1
Tuba8								0.990283	1.41146			2
Lurap1					1.02256				1.41028			2
Stag3									1.40857			1
Idh3a									1.40628			1
Krt20			-1.90029						1.4048			2
Gm1123			-1.44005						1.40264			2
Pgam1								0.829415	1.39614		1.07938	3
Nfil3					1.79754			0.716408	1.3936			3
Tgtp1									1.39349			1
Fuom									1.3931			1
Fabp5								1.1396	1.3885		1.24638	3
Cdhr5			-1.82456						1.38831			2
Mpzl2					1.19864				1.38396			2
Lonrf3					1.45944			0.903445	1.38006		0.872163	4
Fam195a									1.37943			1
Pmvk								1.23242	1.37941			2
Serpina10									1.37826			1
Mmrn1									1.37758			1
Adh6b					1.92879				1.37572			2
Tbc1d21								1.37932	1.37456			2
Etfdh									1.37364			1
Pnpla3			0.790017	-0.982946		1.75204		0.948859	1.37277		1.96437	6
Polr3g								0.982293	1.36817			2
Ptger3					1.45452	0.697793			1.36512		2.35407	4
Ndufv2									1.3651			1
Hsph1						1.35574		1.01809	1.36404			3
Spata22									1.36316			1
Ms4a1					-1.07434				1.35979			2
Slc16a1									1.35946			1
Tmed5									1.35568			1
Ndufs4									1.35248			1
Apln					1.45249			0.790631	1.3502			3
Haus3								0.767122	1.3487			2
Ndufb6									1.34861			1
Zfp982								0.938846	1.34819			2
Acsl3					1.47142				1.34534			2
Sdhd									1.34385			1
Tlcd1									1.34047		1.71339	2
Bcl2l10									1.33967			1
Car14								-0.687371	1.33715			2
Rims4								1.38757	1.33563			2
Prelid3b									1.32913			1
Rilp								0.782676	1.32615			2
Lyrm7									1.32567			1
Uqcrq									1.32504			1
Fn3k					1.03458			0.899598	1.32346			3
Aco2									1.32229			1
Mtx2									1.31829			1
Gja1									1.31132			1
Acadvl									1.30978			1
Rgs7									1.30693			1
Timm10									1.30632			1
Mfsd4b1								0.972497	1.30457			2
Glrx									1.29999			1
Maff								2.93844	1.29971			2
Ldlr					1.63776			1.53475	1.29821			3
Me1			0.930285			0.991198		2.09982	1.29787			4
Ndufa5									1.29728			1
Ppp1r3c								1.04947	1.29436			2
Echdc1					1.29205			0.684709	1.29402		0.939422	4
Idi1								1.23396	1.29379	0.868841	0.746091	4
Cox7a2									1.29345			1
2010107E04Rik									1.28453			1
Ddo			1.19189						1.28341			2
Cox6c									1.28195			1
Slc34a2			-2.10635	-1.10976	2.52425				1.28047			4
Gm10762									1.27783			1
Lingo4								0.951786	1.27527			2
E2f2								1.90415	1.27374			2
Dlat									1.26881			1
Ffar1	0.650471								1.2663			2
Zswim5					1.32745				1.26559			2
Rmdn1									1.26496			1
Pafah2					1.33083			1.08607	1.26458			3
Fhl4									1.26215			1
Ndufa4									1.25782			1
Uqcr10									1.25778			1
Atp5j2									1.25632			1
Zc3h8									1.2563			1
Trim30b						-0.697274			1.25169			2
Plin2								1.29815	1.25119		0.981299	3
Tefm									1.25025			1
Arhgap5								0.706123	1.24852			2
Arhgef37								1.83754	1.24832			2
Ciapin1									1.24728			1
Sycp2			-1.32777						1.24695			2
Tpd52l1					3.35734				1.24691			2
Tc2n					1.23754			-0.824017	1.24612			3
Decr1									1.24206			1
Krt8			-1.7588		1.55199				1.24056			3
Aldob	0.662075		-1.38875				-0.950665	-2.71565	1.23955			5
Pgm3									1.23674			1
Aldh1b1									1.23502			1
Paqr9				-0.652438		0.670487		1.09236	1.23433			4
5730508B09Rik									1.2315			1
Ndufa6									1.23042			1
Itpk1					1.11499				1.22889			2
Olfr733									1.22813			1
Dhrs7								1.45467	1.22648		0.65793	3
Bola3								0.606077	1.22203			2
Mrpl42									1.21997			1
Ldhb									1.21764			1
Fam69b									1.21744			1
Parm1					1.05595				1.2166			2
Hist1h4i			-0.6982			0.706319		1.42754	1.21605			4
Gm17571									1.21314			1
Mrpl47								0.692994	1.21278			2
Cox5a									1.21048			1
Uqcrfs1									1.20815			1
Ankrd9			-0.657297						1.20401			2
Uqcrc2									1.20399			1
Cpa3									1.20342		1.01821	2
Hadha									1.20341			1
Ms4a2									1.20198			1
Khdrbs3					2.00679				1.20008			2
Slc25a1					1.24841			1.33725	1.20004		2.47594	4
Ccdc136									1.19707			1
Gapdh	-0.618254			0.70348				0.61301	1.19492			4
Tnnc1								-1.30404	1.19449			2
Pyurf									1.19427			1
Orm3				-0.735458				1.9458	1.19311			3
Suclg1									1.19108			1
Mcee								0.847704	1.18931			2
Dnmt3l									1.18693			1
Jchain									1.18594			1
Uqcrh									1.18216			1
Sqle					1.04508			1.68256	1.17734		1.6927	4
Ifit1bl1									1.17403			1
Krt79									1.17354			1
Chchd3									1.17062			1
Kcng4								2.52583	1.1706			2
Egln3					1.27903			1.26781	1.17034			3
Tkt					0.939705			1.02838	1.17012		2.42773	4
Ckmt1			-1.65691		1.70609				1.16703			3
Ndufa1									1.16613			1
Cacybp									1.16575			1
Il22ra2						-0.649054			1.16522			2
Cd19					-1.64437	-0.649422			1.16507			3
Efcab12								1.63654	1.16457			2
H2afz									1.16404			1
Hmgcs1									1.1637			1
Tnfrsf13c						-0.727788			1.16359			2
Traf4									1.16233			1
Pgk1						0.63372			1.16006			2
Gnao1			0.649253		-1.2759				1.15958			3
Dusp15									1.15887			1
Acyp2									1.15785			1
Tm6sf2									1.15717			1
Ppif									1.15036			1
P2ry10									1.14951			1
Mgst2									1.1489			1
Adra1a									1.14889		1.11737	2
Hist2h3c1								0.68491	1.14606			2
Pkhd1l1									1.14596			1
ENSMUSG00000090551									1.14582			1
Tulp2					-1.16601				1.14499			2
Hbb-bs						1.43651		0.647963	1.14431			3
Polr2k									1.14322			1
Hsd17b12								1.02423	1.14288		1.59126	3
Spata21									1.13992			1
Scd2					1.342			1.51619	1.13984		0.817159	4
Mlip								-1.10657	1.13934			2
Lss					1.22289			1.30055	1.13749		1.15159	4
Pald1									1.13141			1
Iglc2					-1.09636	0.918141			1.13127			3
Slc25a32								1.38414	1.13087			2
Slc25a19									1.13057			1
Apool									1.1304			1
Atp5f1									1.12875			1
Rmnd1									1.12843			1
Ak4					2.02313	0.70159		2.58954	1.12438			4
Sar1b									1.12346			1
Gbe1								0.723055	1.1233			2
Igkj4									1.12291			1
Perm1									1.12288			1
Olfr734					-1.30997				1.12011			2
Rtn4									1.11929			1
Hist1h3h			-1.20468			0.879983			1.11919			3
Deup1									1.11902			1
Olfr731									1.11789			1
Lace1								0.770283	1.11586			2
Mrps22									1.11507			1
Hspa4l								1.08441	1.11477			2
Eif1a								0.904069	1.11452			2
Dsc2					2.17682				1.11224			2
Cyc1									1.1116			1
Dnaja1						0.62352			1.10895		0.776593	3
Ocstamp						-0.803727		0.622562	1.10769			3
Trmt10c									1.10736			1
Adtrp									1.10696			1
Fcer1a									1.10606			1
Igsf21								0.730005	1.10582			2
Col11a2									1.10457			1
Acot13									1.10344			1
Pcyt2								1.09156	1.10344			2
Ndufb4									1.10291			1
Higd1a								0.661581	1.10265			2
Mrpl12									1.10188			1
Sod2								0.604611	1.10032			2
Dnajc15									1.09993			1
Hspe1									1.09877			1
Trbv15									1.09818			1
Trbv3									1.09633			1
Bet1									1.09515			1
Edaradd					1.90929				1.09484			2
Timm8b								0.785431	1.0916			2
Pmm1									1.08924			1
Dhcr24								1.96596	1.08911			2
Pdha1									1.08845			1
Rpl39l								1.97127	1.08768			2
Ndufab1								0.645003	1.08726			2
Sgol2a								0.684937	1.08467			2
Tomm5									1.08405			1
Casp3								0.684203	1.08358		1.18262	3
Hbb-bt		0.625276				1.62931		0.657525	1.08088			4
Scd3									1.08044		2.56776	2
Nsdhl					1.64723			1.31528	1.07984		0.607289	4
1700029I15Rik									1.07973			1
Atp5k									1.07883			1
Mapkapk3									1.07855			1
Ppargc1b				-0.877502				-0.619134	1.07581			3
Chordc1								0.684829	1.07528			2
Ndufb5									1.07277			1
1700021F05Rik									1.07184			1
Pdhx								0.671923	1.06888			2
Duox2									1.06741			1
Acadl									1.06724			1
Gpr171									1.06555			1
B4galnt2			-0.740875		2.74292				1.06419			3
Acat2					1.33016			0.667776	1.06306		1.66852	4
Cbr4									1.06163			1
Als2cl								1.10719	1.06083			2
Efcab8					-1.01194				1.06024			2
Chpt1									1.05968		0.601337	2
Fcrla						-0.666913			1.05959			2
Fastkd2									1.05822			1
Utp14b									1.05648		0.696086	2
Pde1c									1.05615			1
BC028528								1.19937	1.05383		0.757166	3
Myo5c									1.05341			1
Slc9a2			-1.27353		3.8956				1.05323			3
Hist1h2an			-1.10447						1.05235			2
Ccdc122								1.50059	1.05201			2
Prelid3a					2.09614			1.96505	1.05197			3
Ndufa12									1.05182			1
Mrpl35									1.05172			1
Ndufc1									1.05062			1
Arntl					1.048			1.21102	1.05028			3
Tssk1					-1.45683			-0.794658	1.0496			3
B3gnt5									1.04946			1
6430550D23Rik									1.0492			1
Eno1								1.19868	1.049			2
Ndufs8									1.04819			1
Fam136a									1.04642			1
Il5ra									1.04638			1
Lrrn3									1.04634			1
Gm17655									1.04459			1
Idh3b									1.04306			1
Mfsd4b3								0.717821	1.04266			2
Timm9									1.04203			1
Ofcc1									1.0417			1
Dhrs9			-1.22661			1.1008			1.04137			3
Scd1						1.99646			1.04125		3.21709	3
Cd79a					-1.20192	-0.659689			1.04123			3
Ppp1r3d									1.04102			1
Letm1								1.18187	1.03996			2
Golga7b								0.871492	1.03892			2
Ccr10									1.03439			1
Igkc								-0.991945	1.03336			2
Ndufb8									1.031			1
Ss18l2									1.0305			1
Ifi213									1.03023			1
Coq7									1.02993			1
Rpia								1.34244	1.02793			2
Mrpl30									1.02776			1
Coq8a									1.02678			1
Pdk1					1.21829			0.809457	1.02587			3
Impg2									1.02519			1
Mdh1									1.02498			1
Nipsnap1								1.40162	1.02491			2
Tmem150c									1.02428			1
Sdhb									1.0223			1
Ndufs6									1.02189			1
Scd4									1.0216			1
Cr2						-0.7859			1.02106			2
H2-Ob						-0.72511			1.02056			2
Mal2									1.02053			1
Uchl3									1.01971			1
BC025920								0.893061	1.0174			2
Dtx1									1.01661			1
Uqcrc1									1.01626			1
Slc1a1					4.04152			0.704191	1.01456			3
Acacb								0.972039	1.0127			2
Ndufb11									1.01202			1
Fndc9					-1.33054	-0.856541			1.01143			3
4933400A11Rik									1.01054			1
1700066M21Rik									1.00926			1
Srpk3									1.00919			1
Mterf2									1.00856			1
2410015M20Rik									1.00829			1
Ndufb9									1.00595			1
Mtch2									1.00497			1
Fam63b								0.850876	1.00477			2
Mzb1									1.00475			1
Xlr4a									1.0034			1
Crls1									1.00321			1
Abcd3									1.0031			1
Hepacam2									1.00308			1
Mkks									1.00252			1
Spo11									1.00091			1
Cldn7			-1.23189		1.84043				1.00052			3
Sdhaf3									1.00032			1
Pkm								1.21994	0.999197			2
Mrpl50								0.609538	0.998396			2
Cox6a1									0.997913		0.935312	2
Hsd17b7								1.06156	0.997822			2
Cox6b1									0.996468			1
Olfr732									0.995802			1
Commd3									0.99475			1
Dnajb9									0.993226			1
Ndufc2									0.993194			1
Minos1									0.991254			1
Gpr174					-1.16689	-0.912823			0.990324			3
Kcnab3									0.990125			1
Lrrc39									0.989274			1
Adam3									0.987001			1
Hk2								1.31571	0.986935			2
Lrfn4									0.986834			1
Acap1					2.56636				0.986447			2
Rnf17									0.985796			1
Mcts2									0.985664			1
Ghitm									0.983985			1
Ptcd3									0.983757			1
Rundc3a								1.49709	0.98288			2
A630033H20Rik									0.981876			1
Tmem70									0.980945			1
Gm6377					-1.45151				0.979757			2
Cenpw									0.979614			1
Nipal1									0.979573			1
Mrpl1									0.978868			1
Psph								1.01858	0.978755			2
Igkj2									0.978256			1
Snx10								0.900368	0.977475			2
Lta									0.977443			1
Cyp2r1									0.976284			1
Grem1									0.975623			1
Treml2					-1.26354	-0.798012			0.975403			3
Zfp944									0.974846			1
Iglv3						1.06916			0.973652			2
Gmnn			-0.648303						0.971529			2
Cnst								0.974794	0.970871			2
Ppargc1a								-0.906597	0.970787			2
Cyp2u1								0.623414	0.969393			2
Tfb2m									0.969337			1
Ltb									0.969262			1
Mlx								0.65842	0.968746			2
Acot1						-0.895365		-1.10109	0.967939			3
Banp						0.871049		0.822948	0.966617			3
Ifi209									0.965116			1
Far2									0.963466			1
Rmdn3								1.02806	0.962723		0.844174	3
Gm10382					-1.12378	0.690927			0.96196			3
Pde6b			0.670234						0.959791			2
Cxcr5						-0.802508			0.959134			2
Ppp2r5b								0.630567	0.958803			2
Rasl12									0.957818		0.649343	2
Cox17									0.957293			1
Memo1									0.956429			1
Spib					-1.68384				0.955207			2
Fcer2a						-0.833163			0.95476			2
Tmigd1			-2.02875					0.79357	0.953654			3
Cd22					-1.36476	-1.03461			0.953246			3
Kcnb1								1.04189	0.952971			2
Immp2l									0.952663			1
Hsp90aa1						0.630755		0.753197	0.952259		0.884648	4
Cgrrf1									0.951897			1
Ms4a4c						-1.12749			0.951465			2
Mmgt1									0.949673			1
Ucp3	0.631356					1.16714			0.948528		-0.65756	4
Uqcr11									0.948473			1
Immp1l									0.947193			1
0610009B22Rik									0.946625			1
Ppp1cb									0.945583			1
Rpl24								-0.636548	0.945358			2
Cdc34								0.742019	0.944408			2
F5								-0.854105	0.94401			2
2010107G23Rik									0.943805			1
Slc25a35				-0.749065					0.942892			2
Foxp2									0.941509			1
Gypa							1.53254		0.941378			2
Bhlhe40					1.13545			2.23119	0.94124			3
Hemk1								0.826512	0.940991			2
Tspan8					-1.06058		-1.03521		0.939978			3
Noct			-0.649687					-1.70054	0.938524			3
Bank1									0.938368			1
Cox7c									0.93744			1
Osgin1								1.42221	0.937			2
Ccdc138								0.86625	0.933389			2
Rsph3a									0.931903			1
Dlst									0.929585			1
Dnah12					-1.37329				0.929354			2
Pcdh17									0.92892			1
Ighg1						-1.08693			0.927818			2
Cyb5b								0.800696	0.927138			2
Pip5k1b					2.76058				0.925096			2
Zfp947									0.924722			1
Cenpk									0.924016			1
Igkj5									0.923635			1
Hook1					2.20476				0.923343			2
Atg9b								1.35333	0.922634			2
Acadm									0.922484			1
Uba3									0.921956			1
Rassf3								1.09753	0.921887			2
Cd69					-1.51699				0.921665			2
Mmab								0.742605	0.921496			2
Prorsd1									0.920873			1
Sdsl			-1.08742						0.92085			2
Zfp931									0.920541			1
Ntsr2					5.43455			2.35945	0.919892			3
Atp6v0e									0.91787			1
Ggnbp1									0.913575			1
Ttpa								2.29937	0.910287			2
Gm1043					1.51557				0.909823			2
Mcts1									0.908907			1
Trbc2									0.908653			1
Tfrc								-1.5679	0.907959			2
BC051142					-1.10061				0.907787			2
Slc51b									0.906765			1
Cox16									0.904792			1
Hibch									0.902673			1
Btla						-0.849053			0.902316			2
Gm10767									0.902155		0.668335	2
Fcmr						-0.722239			0.900549			2
Il9r						-1.1102			0.899901			2
Cmpk1									0.899322			1
Lypla1									0.898586			1
Mrps2								0.694558	0.896743			2
Coa6									0.895834			1
Styx									0.894991			1
Zfp932									0.894772			1
Tmem41b									0.89432			1
Acpp					1.46316		-0.677721		0.892684			3
Cd274								-0.838527	0.892209			2
Pkib									0.892129			1
Sspo								0.770665	0.892041	-0.62405		3
Fgfr1op								0.760055	0.891307			2
Cacna1i					-1.90265				0.891201			2
Sh3bgrl2								0.931771	0.890926		0.770126	3
Ppcs								0.646192	0.890448			2
Ccl27a									0.890348			1
Gale								0.743882	0.890196		1.76465	3
Tmem147									0.889275			1
Cd79b									0.88926			1
Olfr735									0.889094			1
Ndufb2									0.889074			1
Fam126b									0.888797		0.697398	2
Trp53inp1								0.72251	0.888584			2
Xk									0.888509			1
Ninl									0.888148			1
Fh1									0.888104			1
Gm20939					2.03846				0.887516			2
Cript									0.887148			1
Pfdn4									0.886545			1
Cntnap1				-0.874218					0.884808		1.02398	3
Cox5b									0.884786			1
Rnf125									0.884229		0.786095	2
Stap1					2.20722	-0.803635			0.883166			3
Doc2g									0.882819		0.84508	2
Mrpl34									0.88229			1
Aacs				0.647519	1.17376			1.59608	0.881657		2.21691	5
Atp5l									0.881414			1
1110008P14Rik									0.879556			1
Tnfsf13									0.87768			1
Mrps33									0.877161			1
Zfp457								1.29031	0.876647			2
Slc25a17									0.876276			1
Ndufs1									0.875897			1
Pygl								0.955448	0.875827		2.70986	3
Sdhaf4									0.874693			1
Mrm3									0.873661			1
Acaca					1.33753			1.17345	0.873646		2.36344	4
Slc25a46									0.873311			1
Il21r									0.872953			1
Spic									0.872724			1
Slc25a2									0.872439			1
Dixdc1								2.13756	0.871912		0.614204	3
Ropn1l								0.91359	0.871334			2
4930453N24Rik									0.871104			1
Plbd1									0.870953			1
Rbm3									0.867694			1
Slc26a6									0.86658			1
Bcl11a					-1.33777				0.866312			2
Hist1h2ab		0.726216	-0.935967			0.608623			0.866013			4
Slc35g1					1.08605			1.50424	0.865854		0.906175	4
Tmem184a					1.25657				0.865729			2
Mrpl20								0.635608	0.865051			2
Chchd2									0.864822			1
Rpf2									0.863455			1
Aasdhppt									0.86258			1
Fastkd1									0.861059			1
Hsh2d									0.860893			1
Cd209e									0.860852			1
Serpinb6b									0.86077			1
Tatdn1									0.860593			1
1700123O20Rik									0.860365			1
Aim1l								4.15338	0.860128			2
Mis18bp1				-0.865759					0.858894			2
Idh3g									0.858672			1
1110001J03Rik									0.858174			1
Psmc6									0.85799			1
Dhrs11									0.857148			1
Atp5o									0.856793			1
P2rx6								1.41684	0.855863			2
Slc51a			-1.09125						0.855538			2
Slc25a51									0.855331			1
Gpi1								1.56365	0.855213			2
Spag1									0.85518		0.616696	2
Mrgprb2									0.854833			1
Iigp1									0.853594			1
G0s2						0.936102		-0.772998	0.852877		1.11719	4
Slc29a2								-0.781544	0.852617			2
Cabp1								0.702698	0.852373			2
Serpina1a									0.852229			1
Zswim7									0.851518			1
4931406C07Rik				-0.780024				0.667271	0.851493		1.4545	4
Blk					-1.98178	-0.863783			0.85146			3
Col27a1									0.850489		0.844994	2
Tigar								0.825941	0.850277			2
Insl6								0.685978	0.849859			2
Tmem246									0.849633			1
Ank									0.848328			1
Megf9									0.848328		0.92829	2
Cd52					1.80404				0.848238		3.31417	3
Sumo1									0.846389			1
Thg1l								1.0112	0.846021			2
Slc9a7					1.19931	-0.619997			0.844755			3
B3galt1									0.844684		0.660099	2
Coq9									0.84453			1
Fcgbp			-2.31602						0.844142			2
Kmt5a								0.720867	0.844072			2
Ppara								-1.2451	0.84364			2
Mob4									0.843639			1
Dcaf6								0.738438	0.843381			2
Scn5a					-1.51338			-0.604484	0.842661			3
Isca2									0.842478			1
Bbip1									0.840361			1
Fndc8									0.839696			1
Mum1l1					2.07731				0.839169		0.847174	3
Gpr135				-0.788029					0.83845			2
Slc39a4					1.51093				0.83773			2
Faah					1.47727				0.836498			2
Ugp2								0.951736	0.836392			2
Lipt1									0.836154			1
Zfp52									0.835169			1
Htr2b									0.834847			1
Ndufa10									0.834215			1
Gm17409									0.833653			1
Orc4									0.833341			1
Ndufs5									0.833252			1
Coq3									0.832868			1
1700010I14Rik									0.831177			1
Sorl1					1.42498			2.60276	0.830907			3
Phospho2									0.830825			1
Unc5cl									0.830207			1
Comt								1.6777	0.829813			2
5430427O19Rik						-0.792666			0.829646			2
Fam129c								-0.865046	0.82947			2
Sla2									0.829317			1
Coa5									0.829069			1
Prdx1									0.828782			1
Fcrl1						-0.802661			0.828506			2
H2-DMb2					2.67687	-0.754232			0.828361			3
Tmem126a									0.827599			1
Rtn4ip1									0.827553			1
Pou2af1					-1.24225	-0.688697			0.827268			3
Trim43c									0.827144			1
Ndufa8									0.825725			1
Mrgprb1					-1.52812				0.825369			2
Kcnk3				-2.10759					0.82524		2.88311	3
Cubn			-0.887222		-1.10936				0.824049			3
Perp			-1.04509		2.57626				0.823772			3
Aldoa								1.20126	0.823507			2
Spag4									0.822251			1
Fam96a									0.821569			1
Epcam			-0.871164		2.46823				0.821165			3
Eci1									0.820902			1
Mreg									0.819391			1
Grpel1									0.819341			1
Rpe									0.819215			1
Siglecg					-1.4725	-0.72197			0.819113			3
Mphosph10									0.817711			1
Smim24									0.817138			1
Gm14399									0.81686			1
Nav2				-0.697551	1.65124				0.814796			3
Cisd1									0.814007			1
Pdss1									0.813923			1
Cd3g									0.813654			1
Oxnad1									0.81347			1
Cox10									0.813347			1
Slc25a39								0.89595	0.812816			2
Pgd								1.72536	0.809899		1.4001	3
Ptp4a1									0.809783			1
Klk8									0.809278			1
Ndufa3									0.80878			1
Ndufv1									0.807974			1
Lrtm1									0.807801			1
F8									0.807541			1
S100a8			-2.05879		-2.01263				0.806935	0.600089	3.10008	5
Zfp979			0.81833						0.806626	0.816405		3
Zfp607b					1.09543				0.806348			2
Rpa3									0.805158			1
Tmem38b									0.805157			1
Lax1									0.804465			1
Cdh19								-0.702599	0.804143			2
Ggt1	-0.997257								0.803924			2
Homer1									0.803194			1
H2-M2						-0.676186			0.803141			2
Rnf11									0.803083			1
Gm561									0.802542			1
Cd53									0.802281			1
Necab1									0.801711			1
Esco1									0.80158			1
Tpmt					1.40336				0.800791			2
H2-Eb2						-0.816536			0.800429			2
Fam210a									0.800045			1
Bloc1s2									0.799615			1
Mocs2									0.79934			1
Nfkbid									0.798921			1
Npas2			0.723692	-0.90835				1.76537	0.798322		1.11624	5
Prox1				-0.916108				-1.34125	0.797361			3
Ly6d									0.796909			1
Ttc41									0.796503			1
Ccdc106									0.796502			1
Stard4								1.09485	0.796453		0.718086	3
Phlda3				-0.87909		0.769365		0.934445	0.79615			4
Coq10a									0.795988			1
Chkb									0.794457			1
Ybx2									0.793884			1
Zfp758									0.793407			1
Srsf10									0.793105			1
Med21									0.793009			1
Gde1									0.792312			1
Coq6									0.792103			1
Atp5g2									0.791798			1
Rgs1					-2.41701				0.7916			2
Sell									0.791409			1
Cd3d									0.791212			1
Prdx3									0.791192			1
Hspa8						0.833596		0.620656	0.790769			3
Tspan32						-0.698585			0.790472			2
Bag2			-0.766881						0.790232			2
Clic5				-0.74864					0.789694			2
Mzf1								-0.783657	0.789289			2
Coasy								0.692693	0.789108		0.965813	3
Pdcd10									0.789099			1
Cd37						-0.637936			0.787759			2
Slc36a2						1.50362	0.630496		0.787493		2.04441	4
Olfr558									0.787488			1
St8sia4						-0.62704			0.786836			2
Lrrc27									0.786297			1
Gbp2b									0.785302			1
Gpr82			0.621973		2.47808				0.784663			3
Misp			-1.37722						0.784524			2
Hist1h2ai			-1.01774						0.784515			2
Gm14403								0.764087	0.783646			2
Rgs18									0.782416			1
Trim67									0.781485		0.884464	2
Spire1								1.20619	0.78126			2
Tmem106b									0.779268			1
Esrra									0.779078			1
Dtl				-0.81509				1.56724	0.778362			3
Aste1									0.778143			1
Kif20b									0.778068			1
Ube2f								0.614186	0.777565			2
Adap1								1.93139	0.777479		0.803533	3
Kynu									0.776581			1
Tyw5									0.776485			1
Chrnb2				-0.627813					0.776358			2
Cish								1.83068	0.775811			2
Cmc2									0.775319			1
Emc6									0.774745			1
Lyrm4									0.77471			1
Eaf2									0.772992			1
Slamf1									0.772907			1
Fam162a						0.695531			0.772507			2
Mecr									0.772232			1
1700030F18Rik				-0.820849					0.772231			2
Ulbp1									0.771776			1
Kcnj2					1.39798			-1.23401	0.771633			3
Ptrh2									0.771593			1
Rpp14								0.76727	0.770597			2
Psma3									0.770467			1
Mrpl46									0.77046			1
Tspan15					1.42261			0.967617	0.770168			3
Ccl28					-1.3762				0.76991			2
Pax5		-0.755313			-2.20296	-0.955603			0.769454			4
Ndufs3									0.769026			1
Hoxb6					1.62129				0.76881			2
Dhx32								1.23152	0.767912			2
Hadh									0.767513			1
Tm7sf2					1.85043			0.869731	0.767099			3
Ndufa9									0.766641			1
Mff									0.7664			1
Rps6kl1									0.766236			1
Apol7c			0.606442						0.76594			2
Dsp			-0.878081		2.03504				0.765926			3
Ralgps2									0.765825			1
Fam169b						-0.727036			0.765615			2
Mrps10									0.764801			1
Rorc						0.743115		0.93375	0.764579			3
Lat					1.75668				0.764422			2
Tnfsf8						-0.604421			0.764099			2
Acss1					0.955896				0.763502			2
Phf11c								-0.874169	0.762904			2
Slamf6						-0.743512			0.76239			2
Serp1								0.65182	0.762255			2
Nkiras1									0.761468			1
Chst3						-0.827518			0.761442			2
Mmaa								0.696728	0.760263			2
Fahd1									0.759625			1
Chn1									0.758463			1
Tmem60									0.75828			1
Ric8b									0.756755			1
Rdh14									0.755406			1
Mblac2									0.754307			1
Gin1									0.754175			1
Ubxn2a									0.754144			1
Clic3				-0.940726	1.50661				0.753777			3
Dynlt3									0.753265			1
Alox12					1.08887			1.57327	0.751564			3
Acrbp									0.751358			1
Akirin1									0.751244			1
Sumo2									0.751196			1
Myb									0.75094			1
Zfp101								0.628606	0.750613			2
Trbc1									0.749982			1
Uty									0.749016			1
Asf1b				-0.760841					0.74869			2
Ddt								0.650582	0.748315			2
P2ry2									0.748266			1
Tjp3					1.25422			2.70832	0.748223			3
Atp6v1d									0.747539			1
Gramd1c									0.747112			1
Pstk									0.746304			1
Zbtb8os									0.746215			1
Guf1									0.745516			1
Kifc2									0.745271			1
Tesc								1.9134	0.745244			2
Msrb2									0.744797			1
Itga10									0.744689		0.711275	2
Mrpl32									0.744438			1
Dnajc19									0.744247			1
Mrpl51									0.744134			1
Gimap9									0.7441			1
Lgals2					-1.22184				0.743392			2
Ntrk3				-1.63102		-0.6775			0.743366		1.60423	4
Zfp942									0.743185			1
Mtif2									0.743123			1
Rnase6									0.742909			1
Kctd1					2.11261				0.7426			2
Cxcr4								0.90739	0.74255			2
Fastkd5									0.742076			1
Cox19								0.942421	0.741872			2
Ubd						-1.06114			0.741732			2
Scin					-1.29639				0.741027			2
Eef1e1									0.740867			1
Ddhd2								0.900029	0.73921		0.700118	3
Klhl4									0.738943			1
Foxred1									0.738345			1
Gon7									0.737328			1
Hyls1					1.26876			1.09559	0.737224			3
Rdh11					1.02811				0.736537			2
Mrps14									0.735534			1
Ccr9								-0.717631	0.735063			2
Poc1a			-0.66261	-0.615921					0.734324			3
Otud6b								0.726443	0.734003			2
Krit1									0.733292			1
Gm15446									0.732602			1
Lat2								-0.76706	0.732351			2
Lysmd3									0.732278			1
Gpr22									0.732073			1
Fxr1								0.613436	0.731206			2
Zfp825									0.731076			1
Nampt									0.730799			1
Ccng2									0.730723			1
Sirt3									0.729836			1
Trappc2									0.729081			1
Pgp					0.97604	0.601428		0.828213	0.728978			4
Uqcc1									0.728714			1
Cd72				0.711779					0.728082			2
Tmie								1.4697	0.728077			2
Cenpq									0.727934			1
Dnah8									0.727596			1
Ndufaf6									0.727209			1
Itgae					1.92783			1.01023	0.727118			3
Lgals4			-0.849885	-0.609749				-0.701933	0.726977			4
Ndufa11									0.72676			1
Lpar6									0.726633			1
Dapl1									0.725951			1
Ehf					1.95249				0.725615			2
Gm14325									0.725534			1
Osgepl1									0.724753			1
Ifi208						-0.704405			0.724281			2
Hba-a2						1.21467		0.608429	0.723188			3
Fkbp3									0.723053			1
Ccdc58									0.722533			1
Map2k6									0.722381			1
Mrpl41									0.721944			1
Fam199x									0.721862			1
Nudt19								0.725549	0.721793			2
Timm22								0.672797	0.721179			2
Gpr21									0.721165			1
Car2			-0.60054		0.995239				0.720958			3
Fam134b					1.51966			-0.727326	0.720712			3
Psma1									0.720573			1
Rasal1						-0.727935			0.72048			2
Qrsl1									0.719904			1
Uchl4									0.719304			1
Ccnc									0.719128			1
Smim8									0.718779			1
Tmem33									0.718143			1
Larp4									0.717994			1
Armc1									0.717774			1
Atp5h									0.717621			1
Ppp2r5a									0.717605			1
Tmc7									0.717578			1
Dqx1									0.717227			1
Hint3									0.717083			1
Tarsl2									0.717018			1
2300009A05Rik									0.716455			1
Ifi27									0.716041			1
Dsg2			-0.611106						0.715639			2
Tex30									0.715594			1
Tespa1					-1.24161				0.715124			2
Cox4i1									0.714915			1
Ptges								1.32607	0.714684		1.41095	3
Tmem268								0.891458	0.713702			2
Mrpl53									0.713382			1
Rita1								0.664007	0.713261			2
Isca1									0.713083			1
Scai									0.71291			1
Bmt2									0.712632			1
Emc2									0.712037			1
Atp8a1								0.824183	0.71056			2
Car13									0.710046		1.27431	2
Tmem128									0.709388			1
Abcb7									0.708917			1
Fcho1									0.708479			1
Zfp971									0.70811			1
Arpc5l									0.707774			1
Tomm7									0.70726			1
Fabp4	0.604759		0.604063	-1.41173		1.45805			0.706915		1.37101	6
Gpr34									0.70645			1
Zfp40									0.70604			1
Grap2					-1.60059				0.705974			2
Gpcpd1									0.70519			1
Taldo1								0.883677	0.705127			2
Olfr164						-1.12644			0.704952			2
Serpini1									0.703844			1
Gtf2ird1					1.11383				0.70367			2
Zfp943									0.702468			1
Nanos1									0.702402			1
Hba-a1						1.36074		0.747053	0.701711			3
Lrrc18						-0.953676			0.701698			2
Vwa8									0.701395			1
Atad3a									0.700953			1
Ahsa2									0.700833			1
Ccng1									0.700771			1
Chchd1									0.700759			1
Herc3									0.700609			1
Mrpl15									0.698281			1
Trim17									0.697998			1
Sirt5									0.697533			1
Atp5b									0.697369			1
Vps13a									0.696275			1
Psmb5									0.695952			1
Tmem69									0.695895			1
Cd209b									0.695861		1.0506	2
Prkaa2									0.695255			1
Tia1									0.695239			1
Taf4b									0.69514			1
Fancb									0.694998			1
Chac2									0.69475			1
Naa30									0.694649			1
Cd8a									0.693993			1
Rfc4			-0.633711						0.693827			2
Spaca1					-1.31076			0.906345	0.6938			3
Ikzf2									0.69362			1
Zmym1									0.693432			1
Eloc									0.693252			1
Naa20									0.691728			1
Coq10b									0.69108			1
Psmb3									0.690775			1
Magoh									0.690402			1
Ccdc125								0.754818	0.690193			2
Ube2d3									0.690028			1
Cd40									0.68988			1
Strbp									0.689754			1
Itk									0.689617			1
Stk17b									0.689548			1
Atpaf2									0.689378			1
Cs									0.68935			1
Mrpl16									0.688836			1
Atp5e									0.688487			1
Ccne2			-0.629165					-0.7961	0.68694			3
Sub1									0.686931			1
1700037H04Rik								1.37399	0.686555		1.41804	3
B3gnt8									0.686494			1
Fgd4									0.686426			1
Rasal3								-0.719561	0.68616			2
Med6									0.684996			1
Rmi1									0.684925			1
Zfp54									0.68486			1
Sft2d1									0.684848			1
Zfp131									0.683893			1
Ndufa2									0.683615			1
Fbxo44								1.00353	0.683046			2
Gimap7									0.682886			1
Chchd4									0.681386			1
Kbtbd8									0.681204			1
Cep44									0.6806			1
Timm17a									0.680097			1
Dusp2									0.679879			1
Atp5a1									0.679877			1
Mief2									0.679811			1
Sacm1l									0.679313			1
Pts									0.678964			1
Cbwd1									0.678543			1
Ikzf3					-0.998873	-0.758228			0.678015			3
Rps27l									0.677966			1
Pnpt1									0.677715			1
Nudt4								1.12837	0.677596			2
Syngr1			-0.693697						0.677474			2
Fdft1									0.677173			1
Ahcyl1									0.676158			1
Pet100									0.675261			1
Zfp91								0.726427	0.674023			2
Slco5a1								-1.10007	0.673701			2
6720489N17Rik								-0.813507	0.672576			2
Dcun1d1									0.672231			1
Srp19									0.672154			1
Uros									0.671932			1
Pop5									0.671558			1
Afg3l2									0.671545			1
Stard10			-0.612131		1.66992				0.671467			3
Zfp770									0.670839			1
Elovl5					1.22409			1.39737	0.670806		1.05685	4
Timm44									0.670621			1
Gimap8									0.670493			1
Dnaja3								0.610974	0.670174			2
Stk26						-0.747034			0.66951			2
Hsdl2									0.669224			1
Gfm1								0.628847	0.668442			2
Psmb7									0.668061			1
Tfr2			-0.98202					1.07702	0.667336			3
Rbpms2									0.667107		1.18652	2
Tmx1									0.666974			1
Ube3a									0.666339			1
Tank									0.666094			1
Cops2									0.665952			1
Tbc1d10c									0.664677			1
Mrps16									0.664453			1
Cisd3									0.66416			1
Rexo2								0.800596	0.66335			2
Ddx3y									0.663331			1
Spryd7									0.662698			1
Fosb					-3.00072	0.772643			0.661645			3
Cd8b1									0.661415			1
Uxt									0.660516			1
Dok3									0.660341	0.796633	0.90319	3
Unc119									0.659723			1
Syt12								0.734865	0.659679		0.693929	3
Pcdh15					-2.05566	-0.848326			0.659437			3
6430573F11Rik									0.659088			1
Vbp1									0.658748			1
Aldh3b2									0.658668		2.20874	2
Btf3l4									0.658625			1
Uqcc2								0.913321	0.65851			2
Ndufaf1									0.657875			1
Trp53rkb									0.656461			1
Gpr18									0.656418			1
Fam122b									0.656116		0.664296	2
R3hdm1									0.655956			1
Trim7								-0.623778	0.655947			2
Zbtb26									0.654999			1
Wdr73									0.654462			1
Nae1									0.653995			1
Gbp8									0.653928			1
Cdc7									0.653736			1
Hccs									0.653616			1
Dhcr7				-0.685868				0.955084	0.653302			3
Slc25a33									0.653164			1
Samd9l									0.653009			1
Ergic2									0.652077			1
Exoc5									0.652034			1
Dnajb1						0.926545		0.774413	0.651912		1.68703	4
Ppp4r3b									0.651454			1
Hspa9									0.650654			1
Zfp938								0.941664	0.650639			2
Taf13									0.650231			1
Mob1b									0.649769			1
Cdkn1a				-1.05					0.649659			2
Actr6									0.649214			1
Zcchc7									0.648553			1
Cox8a									0.648125			1
Lipo3								0.830149	0.647279			2
Eif4e									0.646559			1
Mndal						-0.618642			0.645939			2
Atg10									0.645051			1
Fgf1								0.624876	0.644292			2
Micu3									0.644137			1
Lars2			3.59701	-1.79128		-3.52589	1.76701	-1.342	0.643762	2.41292	-0.959715	8
Zfand6									0.643683			1
Rars2									0.643636			1
Clec2i						-1.09111			0.643094			2
Reep1									0.642692			1
Zfp51									0.642607			1
Abhd17b									0.642506			1
Stab2					-1.26777				0.642275		-0.817293	3
Cops3									0.64204			1
Pde4a									0.642006			1
Ndufa13									0.64118			1
Mtln									0.640749			1
Ndufaf2									0.640371			1
B3gat2									0.639823			1
Tsku				-1.07419					0.639752		0.711631	3
Yme1l1									0.639129			1
Ndufb10									0.639057			1
Immt									0.638314			1
Traf3ip3		-0.729706							0.637828			2
Fcf1									0.637819			1
1810022K09Rik									0.637401			1
Gpx4									0.637266			1
Tmem14c									0.637228			1
Atr									0.635826			1
Ceacam1									0.635255	0.874784		2
Ormdl1					1.03148				0.634741			2
Mapk11					1.52734				0.634608			2
Eif4e3								0.648406	0.634321			2
Taco1									0.633773			1
Ptpn4									0.633285			1
Sacs									0.632888			1
Ssbp1									0.632344			1
Sdhc									0.632061			1
Mrpl55									0.631898			1
Sh2b2									0.630837		0.724795	2
Cops9									0.630382			1
Eif2s3y									0.630361			1
Etfb									0.630275			1
L2hgdh									0.630091			1
Atp5d									0.629827			1
Atp5c1									0.629596			1
Trmt11									0.629486			1
Pla2g12a				0.621015					0.629412			2
Commd2									0.629316			1
Selenot									0.629293			1
Lcorl									0.628814			1
Etfa									0.627661			1
Srsf3									0.627454			1
Ndufb3									0.627181			1
Skil					1.34242			-0.60662	0.627018			3
Stau2									0.626709			1
Tmem161b									0.626639			1
Zkscan3									0.626623			1
Pno1									0.626546			1
Pcmtd1									0.625564			1
Smim10l1									0.625452			1
Hist2h2be									0.625395			1
2700097O09Rik									0.62527			1
Cdo1						0.720182			0.625257		2.02407	3
Dnaja4								0.826586	0.62524			2
Ddit3									0.624129			1
Rfxank									0.623478			1
Med31									0.623085			1
Cd28						-0.861265			0.622952			2
Ranbp6									0.622183			1
Mrps23									0.621983			1
Gimap4				0.695735				0.600552	0.621854			3
Mrps18c									0.62076			1
Pgls									0.62057			1
Sorcs2								0.942914	0.620386			2
Trub2									0.619823			1
Fundc1									0.619521			1
Ak6									0.619241			1
Polr3k									0.618433			1
Dennd4a								0.833016	0.61839		0.667326	3
Yaf2									0.61813			1
Gimap5				0.862088					0.617976			2
Bmi1								0.931074	0.61781			2
Tmem167									0.617687			1
Usp10								0.9808	0.616174			2
Ndufb7									0.615877			1
Gsta3									0.6155		2.49797	2
Gtf2h2									0.61518			1
Synj2bp									0.615031			1
Med20									0.614675			1
Ccnl1								-0.720024	0.613278			2
2610301B20Rik									0.613122			1
Gpatch11									0.612512			1
Cd24a								-0.634215	0.6125			2
Lrig2									0.612265			1
Serhl									0.61193			1
Mrpl57									0.611685			1
Vps37a									0.611581			1
Phb								0.601137	0.611214			2
Stradb									0.611158			1
Sdr39u1									0.610974			1
Gtf2a2									0.609573			1
Brcc3									0.608902			1
Mrpl33									0.608475			1
Timm23					-1.11363				0.608277			2
Vdac3									0.607947			1
Tlr1									0.607829			1
H2-Q10		1.49138	-0.822072		1.82725	0.607819			0.60723		2.49906	6
Adal									0.607072			1
Rpl5								-0.740602	0.606883	0.81479		3
Eny2									0.60672			1
Tfam									0.606564			1
Sh3bgrl					-1.27545			0.682886	0.60568		0.7789	4
Zfp994									0.605626			1
Mdh2									0.604602			1
Xpo1									0.604151			1
Zfp950									0.604132			1
Trmt2b									0.603723			1
Rhoh									0.603633			1
Zfp397									0.60355			1
1110008F13Rik									0.603475			1
Rnf170									0.60317			1
Gpbp1									0.602907			1
Gimap3								-0.947381	0.602242			2
Uck1									0.602069		0.805612	2
Psma4									0.60173			1
Clpx									0.600978			1
Tmbim4					1.13039				0.600852			2
Commd6									0.600444			1
Acat1									0.600308			1
Rad17									0.600209			1
Myo1f									-0.600385		0.658832	2
Fbxo32									-0.600707			1
Lep					-1.51968	1.24915			-0.601353		0.679194	4
Cpne2					-0.965568				-0.601573			2
Xpc									-0.60204			1
Gstt1								-0.879147	-0.602165			2
Tpm1								-0.754999	-0.60254			2
Msn									-0.602629			1
Chdh									-0.602878		1.73789	2
Arfgap3									-0.603006			1
Cmya5				-1.10634				-1.05307	-0.603615			3
Lpp									-0.603753			1
Plxdc2									-0.604457			1
Zfp704									-0.604866			1
Gfod2									-0.606157			1
Fam168a									-0.607288			1
Cacna1c									-0.608054			1
Art3								-1.3233	-0.608496			2
Sox18									-0.609382			1
Ephx1								1.57208	-0.609864			2
Slc29a1									-0.610049			1
Gnl1									-0.610149			1
Mxra7									-0.610248			1
Ubash3b									-0.610573			1
Ugt1a7c									-0.610812			1
Dctn1									-0.611052			1
Tbc1d2b									-0.614007			1
Papln								1.33033	-0.614417			2
Trp53bp2									-0.614689			1
Itm2c					1.09953				-0.61635			2
Cmtm6									-0.617207			1
Pcdh18									-0.61745			1
Lgals9									-0.617724			1
Cobll1									-0.618576			1
Folr2	0.980735								-0.618884			2
Mt1			-0.643943			-0.989264			-0.619088			3
Asph									-0.619445			1
Limk1									-0.619577			1
Tshz2									-0.619751			1
Cnksr3									-0.620788			1
Srp68									-0.621032			1
Fgf10					-1.67426				-0.622088			2
Clstn2									-0.622504			1
Fam129a					-1.08303				-0.623665			2
Lipe									-0.623774		0.665122	2
Ndn									-0.624062			1
Slc6a8									-0.624121			1
Nlgn2									-0.624342			1
Ppp1r9b									-0.624429			1
Arhgap21									-0.62466			1
Kdelr3									-0.624787			1
Nhsl1					1.92052				-0.624986			2
Cyp2f2		0.862547			1.08448				-0.625127		1.5773	4
Slc25a12								-0.814418	-0.625523			2
Syde1									-0.625998			1
Sec22c									-0.626106			1
Ctnnd1									-0.626696			1
Sdf4									-0.626726			1
Zfp36					-1.58244				-0.627429			2
Afap1l2									-0.627435			1
Efna1								-0.61531	-0.627566			2
Tjp2					1.33031				-0.627803			2
Thra					-0.974766				-0.627818			2
Sertad1									-0.627952			1
Pxn									-0.62805			1
Medag								-0.702453	-0.628264			2
Dpysl2									-0.628337			1
Flt1									-0.628897			1
Bbs1									-0.628915			1
Fgfr2									-0.629024			1
Smc1a									-0.629146			1
Cd63									-0.629219			1
Adcyap1r1	0.674321				-1.40125			-0.779878	-0.629619			4
Igf1r					1.37874				-0.629853			2
Myc				-1.28198	-1.63141				-0.630054			3
Atp11a									-0.630065			1
Gcnt2									-0.630492			1
Zfpm2									-0.630521			1
Eftud2									-0.630566			1
Pabpc1					-0.930663				-0.630873			2
Nol6									-0.631345			1
Tns1				-0.617384	-1.60556				-0.631372			3
Man1b1									-0.6315			1
Eif4ebp2				-0.77731	-1.05477			0.708053	-0.631535			4
Kazn									-0.63184			1
Tcaf1									-0.631878			1
P3h2						-0.667747			-0.632439			2
Pkd1									-0.632712			1
Eva1b									-0.632753			1
Nfic				-1.04434	-1.02045				-0.632801			3
Car3		1.22994	0.600129			1.09446	-0.675522	-2.22295	-0.633101	0.676436		7
Grb10									-0.63314			1
Tuba1a				0.613606	-1.67303				-0.63329			3
Rab11fip5									-0.633588			1
Cep295nl						-0.619627			-0.634078			2
Cdc25b									-0.634084			1
Clcn5					2.12075				-0.635092		0.962769	3
Matn2									-0.635871			1
Wdr62					-1.29831			-0.663144	-0.635878			3
Tmem63a									-0.636166			1
Lrig1									-0.636287			1
Map4									-0.636652			1
Osbpl11									-0.636918			1
Lpar1									-0.636922			1
Mbd6				-0.771322	-1.22891				-0.637613			3
Ift57				0.920771					-0.637689			2
Dync1h1									-0.637961			1
Aldh7a1									-0.638153			1
Maged2									-0.638899			1
BC067074									-0.639068	0.778837		2
Man2a1									-0.639235			1
Ncstn									-0.639627			1
Ptch1									-0.639691			1
Rcn1					1.70696				-0.640011			2
Nhsl2									-0.640491			1
Chst15					-1.11988			-0.621004	-0.640566			3
Fmo5									-0.640677			1
Abca3									-0.640703			1
Ctsb									-0.640721			1
Rassf4									-0.640921		0.641953	2
B3gnt3									-0.641082			1
Itga7									-0.641337			1
Nceh1									-0.641584			1
Ttc28									-0.642135			1
Pkdcc									-0.64264			1
Tor3a									-0.643002			1
Jag1									-0.643362			1
Galnt10									-0.643455			1
Dlg4									-0.643463			1
Qsox2					1.54659				-0.643469			2
Amot					1.18977				-0.643714			2
Map9									-0.64389			1
Rapgef3									-0.644869			1
Zfp579									-0.645152			1
Tagln	-0.719183								-0.645203			2
Adprh									-0.645898			1
Slc38a7									-0.646056			1
Zbtb16				-0.614654	-1.20082	-0.613127			-0.64622			4
Neo1									-0.646298			1
Sybu									-0.646406			1
Sema6c								-1.15682	-0.647255			2
Zfp334									-0.647293			1
Zdhhc9									-0.647326			1
Zyx									-0.647394			1
Pcdhgb6									-0.647801			1
Spi1									-0.648458			1
Meis3					-1.21317			0.741989	-0.648784			3
Epas1									-0.648834			1
Flnb									-0.648884			1
Hspa12a					-1.11267			-0.790025	-0.649266			3
Zbtb39									-0.649552			1
Ncald									-0.649585			1
Rere				-0.615864					-0.649756			2
Anln				-0.882029					-0.649791			2
Ctsa									-0.649835			1
Nfix				-0.693288	-1.18405				-0.650062			3
Ajuba									-0.650529			1
Dpep1			-0.764571					0.806629	-0.650973			3
Lzts1			0.712488						-0.651783			2
Zcchc24					-1.08687				-0.651841			2
Ubb									-0.654157			1
Extl3									-0.654195			1
Popdc2			-0.695755					-0.861233	-0.654331			3
Cd163	0.703142								-0.654959			2
Agrn									-0.655689			1
Epb41l3									-0.655759			1
Zfp503									-0.656086			1
Dag1									-0.656662			1
Flrt2									-0.656849			1
Tapbp									-0.658283			1
Galns									-0.658307			1
Dtx3l									-0.658632			1
Plp1				-0.83011		-0.758747			-0.65882			3
Xdh									-0.659342			1
Bst2									-0.659674			1
Camkk1									-0.65969		1.11438	2
Maged1					0.943813				-0.66033			2
Drosha									-0.66035			1
Pgm5								-0.630008	-0.660449			2
Samd4									-0.660486			1
Prrc1									-0.661193			1
Pcdh19									-0.662048			1
Gpr161									-0.662593			1
Snd1									-0.662708			1
Phlda1				-0.776978					-0.662744			2
Clec10a									-0.662771			1
Ndufa4l2									-0.662777			1
Slc2a3						-0.643705			-0.663407			2
Cirbp						-0.675319			-0.663608			2
Dtna								-1.0409	-0.6637			2
Naglu									-0.664074			1
Tdrp									-0.664503			1
Sort1									-0.664663			1
Slc25a30									-0.664794			1
Sema6b									-0.665657			1
Slc15a3									-0.666203			1
Ttyh2									-0.667028			1
Cd300lg									-0.668494			1
Btc					-1.57313			-2.13953	-0.668779			3
Rgmb									-0.66884			1
Cmip				-0.788199					-0.668927			2
Man2b1									-0.669027			1
Foxk1									-0.669205			1
Parva								0.640783	-0.669314			2
Plec									-0.669431			1
Pcbp2				-0.768935					-0.66972			2
Pdlim4					1.44696				-0.670841			2
Lmf2									-0.671285			1
Rtn2					-1.21401			-0.910124	-0.672224			3
Ccr1									-0.672462			1
Anxa3									-0.673135			1
Asap1									-0.673666			1
Slc27a3									-0.673901			1
Sptb								-1.09153	-0.674096			2
Acvr1b									-0.674549			1
Ramp1					0.983237			-0.894318	-0.675544			3
C1qtnf7				0.68016					-0.67563			2
Cpd									-0.676297			1
Slc22a17									-0.676323			1
Agtrap									-0.676436			1
Myoz1								-0.834945	-0.676691			2
Lhpp								-0.855137	-0.677198			2
Vamp2				-0.718974					-0.677643			2
Gm4070									-0.677746			1
Serpina3k		2.41588			1.20631			-2.9114	-0.677818	1.86776		5
Lmnb1									-0.678242			1
Rbm42									-0.678612			1
Tdrd7									-0.679449			1
2900026A02Rik									-0.680702			1
Gpx7									-0.680788			1
Ppl									-0.681526			1
Capg					1.41706				-0.681645			2
Adamts1									-0.682003			1
Rrs1									-0.682648			1
Palld				-0.83352	-1.15804				-0.68265			3
Fyn									-0.682985			1
Mapk12									-0.683159			1
Wtip									-0.683259			1
Nlrp1b								-0.73062	-0.683262			2
Ctgf									-0.683352			1
Krt80									-0.683526		0.852697	2
Shc2									-0.68365			1
Rab3il1									-0.684194			1
Tbxas1									-0.68424		0.690769	2
Alox5ap									-0.684246		0.692961	2
Slc9a1									-0.684594			1
Fcgrt									-0.684781			1
Nedd4									-0.685656			1
Gan									-0.686118			1
Cd14									-0.686134			1
Atp8b2									-0.686186			1
Podxl2									-0.686424			1
Gpat3								-1.81411	-0.686586			2
Myl9									-0.68689			1
Dzank1									-0.68754			1
Plod1									-0.687578			1
Sult5a1				-0.679315	1.56958			1.40155	-0.688048		0.602186	5
Mill2								0.696441	-0.688358			2
Il18rap									-0.688525			1
Sptbn1					-1.04906				-0.688632			2
Map3k6									-0.688912			1
Olfm1									-0.689048			1
P2ry6									-0.689309			1
Crispld1					1.65651			0.749208	-0.690166			3
Mertk									-0.690346			1
Prrc2b									-0.690884			1
Armcx4									-0.691223			1
Aldh18a1									-0.692023			1
Abcb1a									-0.6927			1
Coro2b									-0.692935			1
Cebpa								-0.78771	-0.693128		1.02048	3
Cyp1b1									-0.693397			1
Adamts16					1.18622				-0.693723			2
Fam109b								-0.914133	-0.693981			2
Sema3g									-0.694257			1
Cdc42ep2									-0.694435			1
Snrnp200									-0.695128			1
Lgals12									-0.696084		0.853232	2
Ptpn13	0.697032				1.08048				-0.696279			3
Tagln2									-0.697814			1
Lpgat1					-1.57276				-0.698177			2
Cpox			-0.682307						-0.699351			2
Ly6e									-0.699546			1
Xbp1									-0.699653			1
Gbgt1									-0.69974			1
Adgre1									-0.699975			1
Zfp609									-0.700392			1
Kank1									-0.700956			1
Map7d3					-1.37781			-1.05441	-0.701165			3
Dhtkd1								-0.715317	-0.701782			2
Adam8					-1.13078				-0.70202	0.730763		3
Ckb								1.43544	-0.702166			2
Ar									-0.703641			1
Kmt2d				-0.965864					-0.703716			2
Cd34									-0.704041			1
Agap1									-0.704764			1
Gstm2					1.05718				-0.705828	0.873678		3
Slc25a25								-1.20778	-0.706102		0.852154	3
Psap									-0.706628			1
Xpnpep2									-0.706714			1
Cited2					-0.971208				-0.707043			2
Tm7sf3									-0.707052			1
Mtcl1									-0.707277			1
Dpt									-0.70741			1
Msrb3									-0.707512			1
Ipo4									-0.707544			1
Plpp7									-0.708111			1
Calr					1.44432				-0.708216			2
Enpp3		0.69268	-0.706632						-0.708607			3
Armcx2					2.07259				-0.708699			2
Il17rd									-0.708759			1
St3gal4									-0.708794			1
Hn1l									-0.708894			1
Itga8					1.49632				-0.709562			2
Atp1a1									-0.71012			1
Ptger2									-0.71045			1
Adap2					-1.20629				-0.71065			2
Tuba1b					-1.20889				-0.710807			2
Rgs4	0.751707								-0.711064			2
Nfam1									-0.711092		0.6225	2
Apol6					-1.04014	0.694922		-0.997239	-0.711146			4
Anapc2									-0.711209			1
Dst									-0.711445			1
Pbxip1									-0.711698			1
Actb									-0.712457			1
Ptpn21									-0.71246			1
Vasn									-0.712562			1
Tmem216									-0.712657			1
Ccr5									-0.713336			1
Ehd3									-0.713786			1
Pom121				-0.850166	-1.09997				-0.714644			3
Cfp									-0.714984			1
Slc29a3				-0.623851					-0.715615			2
Wnt11					-1.08607			-1.03177	-0.716592			3
Ptpn23				-0.659641					-0.716862			2
Nsg1									-0.717072		0.601734	2
Pon1					1.52748			-2.48074	-0.7171			3
Rxra									-0.717299			1
Rasgrf2									-0.718287			1
Ptpn14									-0.71837			1
Pole				-0.825128					-0.719289			2
Dirc2									-0.719539			1
Ppp1r3e					-1.38867				-0.719572			2
Hpcal1									-0.719579			1
Cdon									-0.719677			1
Hivep3									-0.71988			1
Ggt5									-0.71989			1
Fcgr1				0.605806					-0.720758			2
Ahcyl2									-0.722048			1
Kctd11									-0.722054			1
Thsd7a									-0.722207			1
Sik1								-0.963658	-0.722716			2
Edn1			0.63952					1.08314	-0.723126		0.790345	4
Bcl9l				-0.725751					-0.723513			2
Kcnj8									-0.723744			1
Arhgef10									-0.723854			1
Wasf2									-0.724082			1
Tgfbi									-0.724697			1
Etv5					3.04317				-0.725608			2
Oaf									-0.725755			1
Susd2						0.658972			-0.725899			2
Spon2									-0.726016		0.874557	2
Lhx6									-0.726191			1
Ust									-0.726708			1
Aplp2									-0.72739			1
Notch2									-0.727422			1
Baiap2									-0.728069		0.738197	2
Igfbp4									-0.728509			1
Gpsm2			-0.689655						-0.729138			2
Lrfn3								0.948804	-0.729295			2
Cdr2l									-0.729974			1
App									-0.730059			1
Slc22a3				-0.652667					-0.730172		0.952944	3
Cacna1a									-0.7303			1
Pigt									-0.730432			1
Sec24b									-0.73072			1
Prtg									-0.730983			1
Cygb									-0.730987			1
Hes1				0.744616				-1.14521	-0.731057			3
Kank4								0.739179	-0.731864			2
Hip1					-1.11892				-0.732167			2
Osbpl5								-0.607669	-0.732924			2
Trim8									-0.73295			1
Oas1a	-0.834505								-0.733534			2
Tmcc3									-0.734007			1
Ston2									-0.734413			1
Fam171a2									-0.73518			1
Gxylt2									-0.735679			1
C1qc									-0.735746			1
Ift122									-0.736143			1
Slc2a12									-0.736342			1
H2-Ab1									-0.736446			1
Synpo									-0.736745			1
Pla2g15								-0.821581	-0.736748			2
Mtss1l				-0.654964	-0.993575				-0.73685		-0.690781	4
Rab36					-1.15421				-0.738138			2
Trp53i13									-0.739346			1
Stat3									-0.739655			1
Sh3pxd2b									-0.739793			1
Frmd4b									-0.740419			1
Camk1d									-0.740524			1
Itgb2									-0.740784		0.610701	2
Fgf2					-1.05973				-0.741097			2
Stxbp1									-0.741846			1
Sparcl1									-0.741921			1
Il33									-0.743198			1
Entpd1									-0.743466			1
Pvalb								-0.754964	-0.744373			2
Junb				0.720634				-0.87308	-0.744882	0.861265	-0.719063	5
Arhgdia									-0.744949			1
Syngap1				-0.708809					-0.745683			2
Csf2rb2		0.710552			-1.08204	-0.707462			-0.746447			4
Tpbgl								0.960158	-0.746643			2
Zfhx3				-0.737691					-0.746706			2
Mall									-0.747212			1
Zbtb34									-0.748355			1
Grb14					-2.29968				-0.748448			2
Lrp5									-0.748564			1
Nkd1									-0.748639			1
Tgfb1i1					-0.993187				-0.748991			2
Dmkn									-0.749131			1
Itgb3									-0.74954		0.965241	2
Khsrp									-0.749943			1
Tmem200b									-0.749985		0.798923	2
Ror1								-0.764554	-0.750544			2
Mov10									-0.751473			1
Slc15a2				0.676477	1.29364			-1.35497	-0.75204			4
Magee1									-0.752094			1
Pck2									-0.75222			1
Adgrg1									-0.752494			1
Ddost									-0.752497			1
Acsm5									-0.753041			1
Fblim1									-0.753134			1
Irak3				-0.608272					-0.754983			2
Sp2				-0.617719	-1.56092				-0.755331			3
Wfs1									-0.755478			1
Acvrl1									-0.75587			1
Adora2b									-0.75604			1
Ddr2									-0.757271			1
Renbp									-0.757945			1
Amz1									-0.758197			1
Agtr1a									-0.758309			1
Ebi3									-0.758355			1
Myh10									-0.759342			1
Zdhhc12									-0.759814			1
Map2								-0.876933	-0.760023			2
Tmem119									-0.76019			1
Hyou1					1.28975				-0.760301			2
Klf2								-1.26097	-0.760375		0.724112	3
Zfp651									-0.76082			1
Clec4a1						-0.852085			-0.760845		0.672325	3
Gamt					1.32241				-0.760989		-0.664672	3
Sfxn3									-0.761251			1
Sufu									-0.761588			1
Jun								-1.01275	-0.761765			2
Slc7a2									-0.762056			1
Cdc42ep1					-1.25086				-0.762069			2
Lmcd1									-0.762174			1
Tyro3					1.38471				-0.762337			2
Nnmt						0.619499			-0.763411			2
Klhl31				-0.613966				-1.1308	-0.765112			3
B4gat1									-0.765176			1
S100a6									-0.765715			1
Npr1									-0.76606			1
Tmem159									-0.76632			1
Rgs16				1.3504					-0.766337			2
Rasl11b									-0.767313		0.85959	2
Id1					-1.30471			-1.01878	-0.768643		0.855602	4
Wdr6								-1.00533	-0.768704			2
Mcm4									-0.768852			1
Lig1			-0.635328						-0.769234			2
Bmp4									-0.769693			1
Cacna1s								-0.903466	-0.770001			2
Gpc4									-0.770065			1
Vcl									-0.770275			1
Ctdsp2									-0.770341			1
Mlph								2.12373	-0.770863			2
Iqsec1				-0.637135	-1.04429				-0.771493			3
Csrp1									-0.771909			1
Arhgef17									-0.772244			1
Krt7					1.50607			-0.844418	-0.772452			3
Myadm									-0.772694			1
Slc13a3								0.740018	-0.772745			2
Pld4									-0.7734			1
Samd4b				-0.677947					-0.773581			2
Ptprb									-0.774497			1
Dll1								-0.910368	-0.774907		0.854699	3
Tcf7l1			0.821039		-1.05503				-0.774928			3
Tmem176a									-0.775371			1
Adam23						-0.718755			-0.775498			2
Rarg									-0.775605			1
H2-K1									-0.77626			1
Igfals									-0.77644			1
Fam114a1									-0.776898			1
Prpf8									-0.777351			1
BC048403								-0.616614	-0.777496			2
C3ar1									-0.778327		0.751583	2
Rras					-1.21601				-0.778949			2
Steap2								-1.33508	-0.779135			2
Prickle2									-0.779308			1
Slc43a3									-0.779756			1
Cul7									-0.779997			1
Arhgap20									-0.780507			1
Slc2a13									-0.780822			1
Col23a1								-1.43072	-0.780904			2
Hs6st1									-0.781706			1
Aif1l									-0.781861			1
Kcna1					1.98779			-0.662529	-0.78292			3
Zfp13					1.16462				-0.783065			2
Lhfpl2									-0.783338		0.7439	2
Peak1									-0.783464			1
Cryab					-1.2511				-0.784564			2
Jsrp1								-0.824642	-0.784636			2
Atxn10									-0.785167			1
Hs1bp3									-0.785259			1
Fut11									-0.785629			1
Il1rl2									-0.786978			1
Fry									-0.787379			1
Prkg2									-0.787463			1
Rpl3l					3.59666			-0.928709	-0.788135			3
B3gnt9									-0.788568			1
Gstm1									-0.788803			1
Zbtb42									-0.789837			1
Ncam1								-0.766649	-0.790894			2
Rtl1									-0.790905			1
Fut10				0.625535					-0.791067			2
Tnip3					-1.3534				-0.791278			2
Olfm2									-0.791347			1
Phc1				-0.767974					-0.791441			2
Ldoc1l						-0.94849			-0.791707			2
Clcn2			-0.836967					-0.697684	-0.792414			3
Fbxo45					-1.09657				-0.792518			2
Dlc1					-1.21623				-0.793217			2
Nqo1					1.04281				-0.793603			2
Drp2						-0.681421		-0.88757	-0.793737			3
Sod3				-0.661294	-1.57539				-0.794337			3
Itga9									-0.794558			1
Ptgir									-0.796523			1
Ctdspl					-0.990155				-0.796553			2
Galnt15									-0.796961			1
Rpn2									-0.796972			1
Apobec2								-1.1063	-0.797722			2
Yipf3									-0.798432			1
Plxna3								-0.769778	-0.798477			2
Pkp2									-0.799052			1
Gpr27									-0.799657			1
Glt8d2									-0.799719			1
Rtp3				-0.602577					-0.800102			2
Jund									-0.800733			1
Abcc9	0.656509								-0.800746			2
Col17a1		-0.658622			1.17191				-0.800798			3
Cbx6									-0.801053			1
Tmem233								-1.02311	-0.801281			2
Pam									-0.801337			1
P3h4					1.23107			-0.801921	-0.801342			3
S1pr2									-0.802386			1
Mfsd7c						0.693549			-0.802508			2
Sh3yl1					1.27977				-0.802605			2
Fbxo10					1.49471				-0.803006			2
Gnai1					-1.18712				-0.803089		0.673219	3
Lamc2							-0.70254		-0.80421			2
Qpct									-0.804242			1
Plbd2									-0.804882			1
Tmem176b									-0.804956			1
Plekho2									-0.805256			1
Mustn1									-0.805269			1
Kdelc2									-0.805432			1
Fbxl7									-0.80581			1
Arl4d									-0.806448			1
Ccdc85b									-0.807386			1
Ano1					1.1513				-0.807728			2
Hpd									-0.807728			1
Vwa1						0.880671			-0.807869			2
Pdgfra					1.19568				-0.807907			2
Wasf3									-0.808119			1
Phactr1									-0.808719			1
Nucb1									-0.808767			1
Smo									-0.809029			1
Stbd1									-0.809457			1
Abcg1									-0.809768			1
Usp35					-1.35977				-0.810676			2
Efs									-0.810702		0.930148	2
C2cd2l									-0.811716			1
Oas1g	-1.21693		-0.744105						-0.811719			3
Tnfrsf1a									-0.811725			1
Robo1									-0.811793		0.602797	2
Unc45b				-0.783486	-1.12789			-0.638335	-0.812178			4
Ugt1a6b								-0.666175	-0.812334			2
Lama4									-0.813088			1
Ppp1r27									-0.813256			1
Igsf3									-0.813322			1
Apbb1								0.819021	-0.813372			2
Adcy1				-0.797193	-1.14631				-0.813724			3
Npdc1					-1.1415				-0.814619			2
Fxyd6								-1.05052	-0.814712			2
Stmn4									-0.814716			1
Adamts15									-0.814717			1
Cadm4									-0.815413			1
Notch1									-0.815419			1
Ext2									-0.815503			1
Tmem178b								-0.712978	-0.81561			2
Snx33									-0.815855			1
Rarres2									-0.817322			1
Mylk4								-1.22117	-0.817794			2
Ski									-0.818599			1
Dennd2a									-0.81899			1
Eya4								-0.957856	-0.819325			2
Selenbp1									-0.819553			1
Tspan4									-0.819831			1
Epb41l1								-0.727365	-0.819892			2
Loxl3									-0.82011			1
Hk3									-0.820198		0.930444	2
Pdlim3								-0.812173	-0.820612			2
Fam129b									-0.821094			1
Prrx2									-0.821112			1
Hmcn2									-0.821162			1
Megf6								1.0132	-0.821408		0.924504	3
Xkr4									-0.822736			1
Arg1		0.818343					-1.14136		-0.823761			3
Cyr61	1.81767		-0.916519		-1.49289				-0.823893	0.829475		5
Adam15									-0.82405			1
Tcp11l1									-0.824168			1
Rgma					-1.0072			-0.649994	-0.824683			3
Fam65a					-0.954053				-0.824841			2
Adamts14							-0.647224		-0.825322			2
Clic4									-0.826272			1
Igfbp3							-0.624663		-0.826326			2
Mag									-0.826494			1
Naga									-0.827481			1
Hpse									-0.82764	0.748345	1.1749	3
Dok6									-0.82828			1
P4hb									-0.828966			1
Fhl3								-0.94082	-0.829279		-0.797598	3
Tnfsf13b									-0.83256			1
Slc38a4					1.35906			-1.22899	-0.832605			3
Reln									-0.832829			1
Mn1								-0.615616	-0.833206			2
Myorg									-0.834011			1
Atf3						0.65785			-0.834406	0.788053	0.954317	4
Bmp2					-1.06187				-0.834407			2
Cap2								-0.93028	-0.83475			2
Peli3									-0.837136			1
Cldn10					2.33886				-0.838129			2
Sec24d									-0.838459			1
Ehd4									-0.838613			1
Mst1r					-1.12325				-0.838631			2
Ifngr1									-0.839444			1
Scpep1									-0.839542			1
4931406P16Rik								-0.846132	-0.840706			2
Ppp1r14c						-0.747485		-0.823723	-0.841108			3
Lima1									-0.844605			1
Bmp6									-0.844656			1
Aldh3b1									-0.844662			1
Scn4a								-1.10062	-0.844758			2
Praf2				0.66966				0.72266	-0.84515			3
Basp1					1.90189				-0.845286			2
Akap6								-1.0116	-0.84762			2
Fmo4								-0.909215	-0.847838			2
Dusp8			-0.700642					-1.154	-0.848798			3
Fkbp11					3.33261				-0.848942			2
Rasl11a									-0.849466			1
Ddah1								-1.20877	-0.849894			2
Ramp2									-0.850129			1
Smad6								-1.54298	-0.850276			2
Evc2									-0.850541			1
Cxcl14	0.628933			-1.29064	1.46772				-0.850803			4
Trim25									-0.85107			1
Obscn				-1.37285	-1.21082			-0.923167	-0.851136			4
Cldn5	0.600751			0.607035				-0.642454	-0.851304		-0.708906	5
Ldb3								-1.00496	-0.851317			2
Trpv4						-0.878745			-0.852009			2
Shisa2					1.42963			-0.959602	-0.852441			3
Fads3									-0.852932			1
Piezo2									-0.853045			1
Rbfox1								-1.27213	-0.854119			2
P4htm									-0.855067			1
Ccdc102a									-0.855109			1
Slco3a1									-0.855886			1
Tek									-0.856037			1
Adamts5					-1.35091				-0.856045			2
Plce1									-0.857155			1
Adamts4									-0.857419			1
Enox1									-0.858229			1
Ifitm3									-0.858472			1
Tnfrsf21									-0.858686			1
Cant1									-0.859648			1
Sirpa									-0.859834			1
Sptbn2									-0.86016			1
[truncated: 4,182 more rows]
