# Supplementary material for: Comparative multi-tissue profiling reveals extensive tissue-specificity in transcriptome reprogramming during thermal adaptation
Source: eLife. 2022 May 17;11:e78556. doi: 10.7554/eLife.78556 (PMC9113744; doi:10.7554/eLife.78556)
Supplement: Supplementary file 5. [file elife-78556-supp5.xlsx]

## Sheet: Suplementary File 5
Tissue	Gene symbol	logFC_cold	logFC_warm	markers
SAT	Spp1	-2.99879	0.751701		the same regulation in warm and cold
SAT	Fabp3	4.42743	-1.63306	fatty acids	up in warm, down in cold
SAT	Slc27a2	3.18337	-3.94798	fatty acids	up in cold, down in warm
SAT	Elovl6	2.37162	-2.21064	fatty acids
SAT	Acaa1b	2.14856	-1.21542	fatty acids
SAT	Insig1	1.8277	-1.38449	fatty acids
SAT	Pdk4	1.7576	-2.22647	fatty acids
SAT	Plin5	1.74697	-2.47102	fatty acids
SAT	Apoa1	1.63627	-2.89777	fatty acids
SAT	Acly	1.53794	-1.53145	fatty acids
SAT	Apoc2	1.44293	-1.15647	fatty acids
SAT	Pnpla3	1.36764	-0.769498	fatty acids
SAT	Acadvl	1.30472	-1.47169	fatty acids
SAT	Echdc1	1.2885	-1.59256	fatty acids
SAT	Hadha	1.19835	-1.32123	fatty acids
SAT	Adtrp	1.10163	-1.64698	fatty acids
SAT	Ndufab1	1.08233	-1.15965	fatty acids
SAT	Acadl	1.06233	-1.39348	fatty acids
SAT	Acat2	1.05795	-1.37505	fatty acids
SAT	Cbr4	1.05689	-0.843115	fatty acids
SAT	Scd1	1.03628	-1.98219	fatty acids
SAT	Ndufs6	1.01705	-1.04588	fatty acids
SAT	Acacb	1.00736	-1.33061	fatty acids
SAT	Abcd3	0.998029	-1.06983	fatty acids
SAT	Acot1	0.962398	-0.621876	fatty acids
SAT	Acadm	0.917638	-1.2477	fatty acids
SAT	Aacs	0.876738	-0.877532	fatty acids
SAT	Acaca	0.86839	-1.55907	fatty acids
SAT	Ppara	0.838494	-1.77752	fatty acids
SAT	Faah	0.831818	1.59171	fatty acids
SAT	Eci1	0.816133	-1.33769	fatty acids
SAT	Ggt1	0.80494	1.13698	fatty acids
SAT	Mecr	0.767375	-1.01682	fatty acids
SAT	Ptges	0.709781	-1.12276	fatty acids
SAT	Elovl5	0.665661	-0.621918	fatty acids
SAT	Lipe	-0.628539	-0.912532	fatty acids
SAT	Por	-1.03029	-0.674933	fatty acids
SAT	Myh1	-2.22831	1.45274
SAT	Ucp1	7.33446	-8.09085	thermogenesis
SAT	Acot11	4.61652	-1.59306	thermogenesis
SAT	Cox7a1	3.95944	-2.24951	thermogenesis
SAT	Dio2	3.25562	-4.03606	thermogenesis
SAT	Cidea	2.68039	-2.89612	thermogenesis
SAT	Cycs	2.02271	-1.47956	thermogenesis
SAT	Slc25a20	1.77149	-1.52932	thermogenesis
SAT	Dld	1.46932	-1.00003	thermogenesis
SAT	Hadhb	1.44812	-1.60938	thermogenesis
SAT	Acaa2	1.42153	-1.32598	thermogenesis
SAT	Idh3a	1.40126	-1.41143	thermogenesis
SAT	Etfdh	1.36868	-1.21198	thermogenesis
SAT	Aco2	1.31729	-1.4375	thermogenesis
SAT	Gja1	1.30585	-0.90087	thermogenesis
SAT	Decr1	1.23727	-1.37363	thermogenesis
SAT	Pgk1	1.15408	-0.893223	thermogenesis
SAT	Cyc1	1.1066	-1.12585	thermogenesis
SAT	Acot13	1.09858	-0.885324	thermogenesis
SAT	Pdha1	1.08349	-1.1335	thermogenesis
SAT	Arntl	1.04396	0.891437	thermogenesis
SAT	Ndufb8	1.02594	-1.20649	thermogenesis
SAT	Pkm	0.994023	-0.974979	thermogenesis
SAT	Dlst	0.924572	-0.804182	thermogenesis
SAT	Fh1	0.883161	-0.928401	thermogenesis
SAT	Mrpl34	0.87722	-0.924186	thermogenesis
SAT	Ndufs1	0.870952	-0.918786	thermogenesis
SAT	Idh3g	0.853731	-0.957985	thermogenesis
SAT	G0s2	0.847401	-0.805339	thermogenesis
SAT	Ndufa10	0.829211	-1.00518	thermogenesis
SAT	Ndufa8	0.820808	-0.889682	thermogenesis
SAT	Ndufv1	0.803133	-0.952532	thermogenesis
SAT	Ndufs3	0.764167	-0.916886	thermogenesis
SAT	Hadh	0.762727	-1.13952	thermogenesis
SAT	Ndufa9	0.761756	-0.973995	thermogenesis
SAT	Fahd1	0.754628	-0.663759	thermogenesis
SAT	Cxcr4	0.73511	0.842284	thermogenesis
SAT	Fabp4	0.702186	-1.23581	thermogenesis
SAT	Cs	0.684338	-0.898685	thermogenesis
SAT	Actn3	-0.893299	-1.063	thermogenesis
SAT	Lcn2	-1.66129	-0.650638	thermogenesis
SAT	Mybpc1	-2.0239	0.776076
SAT	Mpz	-2.01061	1.68927
SAT	Aldoc	-1.94353	1.1487
SAT	Thbs4	-1.85213	0.739447
SAT	Cd5l	-1.81972	1.53334
SAT	Ankrd29	-1.8189	0.887561
SAT	Cilp	-1.80167	0.856716
SAT	Slfn4	-1.78794	0.98476
SAT	Penk	-1.71246	0.830789
SAT	Fbn2	-1.68965	1.17731
SAT	Thbd	-1.68806	1.05283
SAT	Acta2	-1.6817	0.724787
SAT	Crispld2	-1.553	0.792742
SAT	Dkk3	-1.53755	0.615323
SAT	Col13a1	-1.48564	0.982414
SAT	Vwf	-1.46899	0.622035
SAT	Nmnat2	-1.45354	0.798538
SAT	Lrrn1	-1.4492	0.664825
SAT	Slco2b1	-1.40407	0.654106
SAT	Ngfr	-1.37583	1.27787
SAT	Foxs1	-1.3612	0.846426
SAT	Col4a6	-1.35513	0.813151
SAT	Fam150b	-1.34761	1.75095
SAT	Kif1a	-1.34747	1.67918
SAT	Polr2a	-1.34652	0.706677
SAT	Apol9b	-1.3433	0.88504
SAT	Adra2a	-1.32866	0.860428
SAT	Hspb7	-1.31521	0.979699
SAT	Gabre	-1.29248	0.684536
SAT	Aplp1	-1.25016	1.43021
SAT	Mal	-1.20977	1.08759
SAT	Lrrc4c	-1.20328	0.622517
SAT	Psrc1	-1.17995	1.309
SAT	Vtn	-1.15497	0.780994
SAT	Plvap	-1.15474	0.818691
SAT	Dchs1	-1.11687	1.05962
SAT	Cpxm2	-1.10598	0.726328
SAT	Hs3st1	-1.09279	0.72321
SAT	Cx3cl1	-1.08707	0.991475
SAT	Rspo1	-1.08566	0.674098
SAT	Prx	-1.07735	1.48833
SAT	Folh1	-1.07484	0.798689
SAT	S1pr3	-1.06934	0.774219
SAT	Il1rn	-1.06859	1.1113
SAT	Lrrc32	-1.06841	0.628351
SAT	Cyp26b1	-1.06788	1.41172
SAT	Tnfrsf1b	-1.05867	0.876148
SAT	Lrp4	-1.05535	0.693583
SAT	Gm7694	-1.04763	0.678463
SAT	Gja4	-1.04659	1.06145
SAT	Clu	-1.04359	1.22494
SAT	Ltb4r1	-1.04099	1.12351
SAT	Myh11	-1.03858	0.937436
SAT	Kcnd1	-1.03695	0.707022
SAT	Mmrn2	-1.0341	0.675763
SAT	Sema3f	-1.03254	0.636794
SAT	Heyl	-1.03052	0.822279
SAT	Csrp3	-1.02324	1.43533
SAT	Itgb4	-1.01552	1.14499
SAT	Kcnc3	-1.01395	0.901589
SAT	Ncmap	-1.01227	1.18834
SAT	Bace2	-1.00147	0.840665
SAT	Gabrr2	-0.986699	1.40822
SAT	Tlr9	-0.986111	1.47448
SAT	Erbb2	-0.966983	0.622833
SAT	Fmod	-0.955245	1.58634
SAT	Wscd1	-0.952549	0.824057
SAT	Tenm3	-0.950987	1.30831
SAT	Ttyh3	-0.950543	0.919302
SAT	Ephb6	-0.946551	0.933196
SAT	Tlr2	-0.945815	0.607457
SAT	Notch3	-0.94433	0.814219
SAT	Comp	-0.939181	1.56678
SAT	Mpeg1	-0.938904	0.798351
SAT	Ptprj	-0.931715	0.662541
SAT	Cx3cr1	-0.926325	1.3063
SAT	Tbx2	-0.92593	1.025
SAT	Cys1	-0.919115	0.665004
SAT	Laptm5	-0.917397	1.05058
SAT	Zmiz1	-0.916791	0.622096
SAT	Cers6	-0.909598	0.622444
SAT	Nfatc2	-0.908033	0.994841
SAT	Stac2	-0.907214	0.92659
SAT	Flna	-0.905122	0.835078
SAT	Il6ra	-0.899386	0.633434
SAT	Tiam1	-0.889393	0.77812
SAT	Mrgpre	-0.882584	0.755112
SAT	Abhd2	-0.879034	0.67891	fatty acids
SAT	Myh9	-0.867808	0.900035
SAT	Kcna6	-0.866489	0.985185
SAT	Piezo2	-0.859341	0.768991
SAT	Rasl11a	-0.853074	1.13807
SAT	Basp1	-0.852118	0.737
SAT	Bmp6	-0.850719	0.601492
SAT	Reln	-0.840473	1.11517
SAT	Bmp2	-0.839508	0.632525
SAT	Igfbp3	-0.830917	1.03781
SAT	Megf6	-0.829097	1.59175
SAT	Cadm4	-0.822822	1.03348
SAT	Igsf3	-0.819475	0.76989
SAT	Adcy1	-0.819331	1.07292
SAT	Abcg1	-0.815352	0.732618
SAT	Ano1	-0.812326	0.986045
SAT	S1pr2	-0.808244	0.669788
SAT	Plxna3	-0.803713	0.708383
SAT	Galnt15	-0.801853	0.731225
SAT	Drp2	-0.799099	1.56016
SAT	Ncam1	-0.798109	0.915517
SAT	Ldoc1l	-0.796962	0.95563
SAT	Kcna1	-0.79039	0.688425
SAT	Tmem176a	-0.780863	0.668705
SAT	Dll1	-0.780755	0.799997
SAT	Bmp4	-0.775342	0.783546
SAT	Lig1	-0.775015	0.798347
SAT	Mcm4	-0.774721	0.78186
SAT	Tyro3	-0.767485	0.793502
SAT	Sfxn3	-0.767104	0.83726
SAT	Klf2	-0.766046	0.78715
SAT	Ror1	-0.756764	0.799005
SAT	Itgb3	-0.755955	0.847057
SAT	Tmem200b	-0.755948	0.70799
SAT	Csf2rb2	-0.75325	1.40714
SAT	Junb	-0.749999	1.20128
SAT	Il33	-0.749334	0.65907
SAT	Itgb2	-0.747369	0.954382
SAT	Camk1d	-0.746547	0.93409
SAT	H2-Ab1	-0.74188	0.876629
SAT	Hes1	-0.735356	0.668518
SAT	Susd2	-0.731563	1.47381
SAT	Pole	-0.725506	0.921874
SAT	Ehd3	-0.718252	1.1316
SAT	Actb	-0.717587	0.741571
SAT	Pbxip1	-0.716735	0.630596
SAT	Armcx2	-0.714744	0.62512
SAT	Adam8	-0.709969	1.11472
SAT	Sema3g	-0.699955	0.685062
SAT	Aldh18a1	-0.697969	0.617569
SAT	Il18rap	-0.695245	1.07986
SAT	Atp8b2	-0.691622	0.667102
SAT	Fyn	-0.688568	0.783913
SAT	2900026A02Rik	-0.685902	0.649906
SAT	Lmnb1	-0.685414	1.20862
SAT	C1qtnf7	-0.679393	0.670105
SAT	Plec	-0.674886	0.61859
SAT	Foxk1	-0.674269	0.649809
SAT	Slc2a3	-0.668751	1.02128
SAT	Cirbp	-0.668127	0.780366
SAT	Zbtb16	-0.651428	0.785415
SAT	Tagln	-0.651015	0.784545
SAT	Galnt10	-0.648806	0.608015
SAT	Igf1r	-0.635037	0.737095	thermogenesis
SAT	Ttc25	4.04128	-1.61866
SAT	Aspg	3.84206	-3.3631
SAT	Ppp1r3b	3.77358	-0.750451
SAT	Otop1	2.88424	-3.67205
SAT	Mup3	2.82662	-2.79946
SAT	Rwdd2a	2.63885	0.709578
SAT	Cox8b	2.59914	-3.00319
SAT	Hephl1	2.59728	-1.70898
SAT	Adcy10	2.53164	-2.46784
SAT	Pdzk1ip1	2.47049	-2.13178
SAT	Pank1	2.41472	-1.65613
SAT	Sycp3	2.31121	-1.03976
SAT	Slc2a5	2.1315	-2.01578
SAT	Olfm4	2.08426	2.73418
SAT	Impa2	2.01275	-0.818372
SAT	Tmem79	1.9351	-1.1441
SAT	Poln	1.91672	-1.1349
SAT	Phospho1	1.84309	-1.97693
SAT	Ccdc18	1.83303	1.87907
SAT	P2rx5	1.83106	-1.99356
SAT	Sec14l4	1.79328	-0.812688
SAT	A830018L16Rik	1.78999	-1.76484
SAT	Mpc2	1.761	-1.67536
SAT	Sucla2	1.74929	-1.22683
SAT	Aspa	1.70733	-1.24432
SAT	Gys2	1.69845	-2.20421
SAT	Mpc1	1.69419	-1.75883
SAT	Pdhb	1.6875	-1.44484
SAT	Chchd10	1.68653	-2.1577
SAT	Ndufaf4	1.67887	-0.629672
SAT	2010003K11Rik	1.67215	-1.49617
SAT	Gpd2	1.66771	-1.48555
SAT	Lactb2	1.66399	-0.889276
SAT	Clca1	1.6631	1.29894
SAT	Cox7b	1.6512	-1.23281
SAT	Fbp2	1.63064	-1.82033
SAT	Mtfp1	1.58831	-1.28211
SAT	Agpat2	1.56333	-2.09424
SAT	Sc5d	1.5628	-0.799514
SAT	Clstn3	1.55246	-2.18702
SAT	Fdps	1.54916	-0.999244
SAT	Thrsp	1.54546	-1.46495
SAT	Muc13	1.53686	1.34129
SAT	Pls1	1.535	1.99888
SAT	Apoo	1.52934	-1.36207
SAT	Prune2	1.52778	-0.735013
SAT	Gpd1	1.5216	-1.28621
SAT	Usmg5	1.5138	-1.16529
SAT	Nudt7	1.50867	-1.38816
SAT	Me3	1.50431	-0.98545
SAT	Ncan	1.4643	-0.759862
SAT	Uqcrb	1.45847	-1.21239
SAT	Celsr3	1.45113	0.679413
SAT	Acss2	1.4507	-1.53355
SAT	Hebp2	1.4426	-1.80458
SAT	Tlcd2	1.42626	-1.49341
SAT	Pfkl	1.42615	-1.12855
SAT	Tuba8	1.40546	-1.32767
SAT	Lurap1	1.40522	-1.25664
SAT	Vpreb3	1.39466	1.26522
SAT	Pgam1	1.39108	-0.839512
SAT	Cdhr5	1.38991	1.2325
SAT	Fuom	1.38771	-1.40223
SAT	Fabp5	1.38324	-1.03902
SAT	Mpzl2	1.37836	-1.57933
SAT	Fam195a	1.37431	-1.55273
SAT	Pmvk	1.37413	-0.915797
SAT	Serpina10	1.37197	0.921243
SAT	Lonrf3	1.37172	1.43653
SAT	Mmrn1	1.37076	0.603679
SAT	Ndufv2	1.36017	-1.12694
SAT	Ptger3	1.36004	-0.8604
SAT	Hsph1	1.3578	-0.642784
SAT	Ms4a1	1.35539	1.54653
SAT	Slc16a1	1.3541	-1.01181
SAT	Tmed5	1.35096	-0.785381
SAT	Ndufs4	1.34749	-1.17984
SAT	Ndufb6	1.34361	-1.18821
SAT	Sdhd	1.33891	-0.950382
SAT	Tlcd1	1.33534	-0.972188
SAT	Rims4	1.33063	-0.644947
SAT	Rilp	1.32082	-0.716807
SAT	Uqcrq	1.31998	-1.38334
SAT	Fn3k	1.31876	-0.768197
SAT	Mtx2	1.31333	-0.782535
SAT	Rgs7	1.30204	-1.58281
SAT	Timm10	1.30083	-0.828094
SAT	Maff	1.29468	-0.742603
SAT	Me1	1.29285	-1.78819
SAT	Ndufa5	1.29239	-0.996244
SAT	Ppp1r3c	1.28952	-1.12607
SAT	Cox7a2	1.28866	-1.19795
SAT	2010107E04Rik	1.27957	-1.06702
SAT	Ddo	1.27849	-1.15825
SAT	Cox6c	1.277	-1.27974
SAT	E2f2	1.26882	1.26865
SAT	Dlat	1.26378	-1.3061
SAT	Rmdn1	1.2604	-0.804929
SAT	Ndufa4	1.25293	-1.27636
SAT	Uqcr10	1.25265	-1.35302
SAT	Atp5j2	1.25148	-1.10369
SAT	Trim30b	1.24685	1.57136
SAT	Plin2	1.24599	-1.51968
SAT	Tefm	1.2459	-0.627166
SAT	Arhgef37	1.24331	-0.802425
SAT	Tpd52l1	1.24328	-1.14603
SAT	Aldob	1.24217	-5.90125
SAT	Krt8	1.24214	2.87194
SAT	Aldh1b1	1.23037	1.52008
SAT	Paqr9	1.22933	-2.04324
SAT	Ndufa6	1.22561	-0.982529
SAT	Itpk1	1.22391	-0.689991
SAT	Dhrs7	1.22153	-0.968306
SAT	Klhl14	1.22087	1.58767
SAT	Bola3	1.21734	-1.13431
SAT	Mrpl42	1.21531	-0.889135
SAT	Fam69b	1.21274	-1.73787
SAT	Ldhb	1.21272	-1.05347
SAT	Parm1	1.21124	-1.64108
SAT	Cox5a	1.2053	-1.18197
SAT	Uqcrfs1	1.2031	-1.0654
SAT	Ankrd9	1.1993	-0.692594
SAT	Uqcrc2	1.19898	-0.988956
SAT	Slco4a1	1.19499	1.48539
SAT	Ltk	1.19489	2.03199
SAT	Khdrbs3	1.1948	-0.950554
SAT	Slc25a1	1.19451	-1.55226
SAT	Gapdh	1.19001	-0.973706
SAT	Pyurf	1.18947	-1.00671
SAT	Orm3	1.18856	-0.987811
SAT	Suclg1	1.18606	-1.08154
SAT	Mcee	1.18459	-0.87977
SAT	Uqcrh	1.17716	-0.907105
SAT	Krt79	1.16841	-2.04255
SAT	Chchd3	1.16575	-1.01391
SAT	Egln3	1.16525	-0.654058
SAT	Tkt	1.16522	-1.48217
SAT	Kcng4	1.16521	-1.6866
SAT	Il22ra2	1.1623	0.961887
SAT	Ndufa1	1.16109	-1.25808
SAT	Cd19	1.1607	1.68526
SAT	Tnfrsf13c	1.1597	1.69232
SAT	Hmgcs1	1.15837	-0.792274
SAT	Gnao1	1.15445	-1.00176
SAT	Acyp2	1.15338	-1.04439
SAT	P2ry10	1.14513	1.03904
SAT	Mgst2	1.14452	-0.86359
SAT	Adra1a	1.14379	-1.23392
SAT	Hist2h3c1	1.14138	-0.672854
SAT	Pkhd1l1	1.13934	1.34209
SAT	Hsd17b12	1.13766	-1.46441
SAT	Lss	1.13226	-0.865484
SAT	Apool	1.12575	-0.861957
SAT	Slc25a19	1.12544	-0.604705
SAT	Atp5f1	1.12385	-0.839644
SAT	Ak4	1.12061	-1.00448
SAT	Sar1b	1.11887	-0.81751
SAT	Gbe1	1.11837	-1.06441
SAT	Rtn4	1.11439	-0.938106
SAT	Lace1	1.11089	-0.952034
SAT	Hspa4l	1.10957	-0.609214
SAT	Ndufb4	1.09824	-1.17447
SAT	Higd1a	1.0976	-1.06646
SAT	Col11a2	1.09731	0.725692
SAT	Mrpl12	1.09648	-0.99651
SAT	Sod2	1.09529	-1.09785
SAT	Dnajc15	1.09506	-1.30748
SAT	Hspe1	1.09409	-0.819554
SAT	Edaradd	1.09215	1.67181
SAT	Timm8b	1.0868	-0.884877
SAT	Pmm1	1.08421	-1.22232
SAT	Rpl39l	1.08302	-1.79494
SAT	Tomm5	1.07977	-0.750695
SAT	Nsdhl	1.07433	-1.12544
SAT	Atp5k	1.07393	-0.931084
SAT	1700029I15Rik	1.07385	-0.880722
SAT	Ppargc1b	1.07063	-0.759865
SAT	Ndufb5	1.06773	-0.973738
SAT	1700021F05Rik	1.067	-0.77457
SAT	B4galnt2	1.06601	2.06482
SAT	Pdhx	1.06381	-1.0106
SAT	Gpr171	1.06112	0.798102
SAT	Als2cl	1.05583	1.08099
SAT	Fcrla	1.05569	1.6814
SAT	Chpt1	1.05502	-1.21845
SAT	Myo5c	1.04864	-1.41666
SAT	Slc9a2	1.04837	-1.01933
SAT	Ccdc122	1.04798	-0.655504
SAT	Ndufa12	1.04707	-1.22997
SAT	Mrpl35	1.04686	-0.70106
SAT	Il5ra	1.04608	1.815
SAT	B3gnt5	1.04598	1.60831
SAT	Ndufc1	1.04557	-1.04472
SAT	Ndufs8	1.04323	-0.871364
SAT	Lrrn3	1.04206	1.17451
SAT	Idh3b	1.03817	-0.881166
SAT	Cd79a	1.03733	1.60798
SAT	Golga7b	1.03497	-1.78715
SAT	Letm1	1.03482	-0.984292
SAT	Dhrs9	1.03212	-0.757299
SAT	Coq7	1.0251	-0.909925
SAT	Mrpl30	1.02299	-0.924187
SAT	Tmem150c	1.02031	1.57582
SAT	Mdh1	1.02007	-1.05937
SAT	Sdhb	1.0174	-0.979157
SAT	Mal2	1.01676	-0.735611
SAT	Cr2	1.0165	1.69746
SAT	H2-Ob	1.01582	1.74054
SAT	Gm614	1.01448	1.67563
SAT	BC025920	1.01386	1.09049
SAT	Dtx1	1.01173	1.72701
SAT	Uqcrc1	1.01132	-0.979
SAT	Ndufb11	1.00707	-0.911201
SAT	Srpk3	1.00496	1.65627
SAT	2410015M20Rik	1.00356	-0.887512
SAT	Mzb1	1.00198	1.8056
SAT	Ndufb9	1.00103	-1.24052
SAT	Hepacam2	1.0005	0.93028
SAT	Mtch2	0.999996	-1.1522
SAT	Xlr4a	0.999368	1.25197
SAT	Crls1	0.998477	-1.13874
SAT	Mkks	0.997786	-0.782191
SAT	Mrpl50	0.993609	-0.719318
SAT	Cox6a1	0.99292	-1.33256
SAT	Cox6b1	0.991467	-1.05654
SAT	Dnajb9	0.988633	-0.600662
SAT	Ndufc2	0.988446	-0.92491
SAT	Gpr174	0.98685	1.58125
SAT	Minos1	0.986178	-0.804336
SAT	Lrrc39	0.984992	-0.631145
SAT	Hk2	0.98214	-0.913362
SAT	Lrfn4	0.981414	0.750991
SAT	Acap1	0.981381	1.5368
SAT	Mcts2	0.980557	-1.07036
SAT	Ghitm	0.979062	-0.802803
SAT	A630033H20Rik	0.977842	1.46484
SAT	Tmem70	0.976086	-0.865594
SAT	Psph	0.9735	-0.717249
SAT	Lta	0.973312	1.45152
SAT	Snx10	0.972521	-1.16725
SAT	Grem1	0.972023	2.44647
SAT	Treml2	0.971146	1.30216
SAT	Ppargc1a	0.966431	-0.686628
SAT	Cyp2u1	0.964972	-0.723079
SAT	Ltb	0.964501	1.18149
SAT	Far2	0.95895	0.829964
SAT	Rmdn3	0.957473	-0.94532
SAT	Cxcr5	0.955075	1.42007
SAT	Rasl12	0.953031	-0.98394
SAT	Cox17	0.952438	-0.77919
SAT	Spib	0.950859	1.61609
SAT	Fcer2a	0.950605	1.81804
SAT	Cd22	0.948626	1.79766
SAT	Immp2l	0.9477	-1.30348
SAT	Cgrrf1	0.947191	-0.900502
SAT	Ms4a4c	0.945719	1.40147
SAT	Mmgt1	0.944834	-0.631341
SAT	Ucp3	0.943879	-1.67648
SAT	Uqcr11	0.94353	-1.14345
SAT	Immp1l	0.942989	-0.75257
SAT	0610009B22Rik	0.942229	-0.776985
SAT	Cdc34	0.939495	-0.701909
SAT	Slc25a35	0.937594	-1.0889
SAT	Bank1	0.933728	1.50051
SAT	Cox7c	0.933473	-1.02375
SAT	Rsph3a	0.927932	-0.83483
SAT	Pcdh17	0.924037	1.19386
SAT	Pip5k1b	0.922516	1.85072
SAT	Cyb5b	0.922182	-0.861129
SAT	Hook1	0.919692	1.00033
SAT	Atg9b	0.918335	-1.29097
SAT	Cd69	0.918127	1.08225
SAT	Sdsl	0.916809	-1.12779
SAT	Prorsd1	0.916083	-0.70672
SAT	Ntsr2	0.915651	-0.830533
SAT	Atp6v0e	0.913019	-0.612418
SAT	BC051142	0.901985	1.56587
SAT	Hibch	0.897946	-0.969777
SAT	Btla	0.897891	1.87648
SAT	Il9r	0.896737	1.78947
SAT	Acpp	0.888369	1.28654
SAT	Cacna1i	0.887439	1.76866
SAT	Pkib	0.887047	1.33252
SAT	Sspo	0.88586	0.817779
SAT	Gale	0.884973	-0.72591
SAT	Cd79b	0.884507	1.53931
SAT	Tmem147	0.884276	-0.791854
SAT	Trp53inp1	0.884181	0.815165
SAT	Ndufb2	0.884162	-1.05454
SAT	Fam126b	0.884093	-1.02641
SAT	Cox5b	0.87998	-1.07726
SAT	Stap1	0.878779	1.47602
SAT	Atp5l	0.876841	-0.978933
SAT	1110008P14Rik	0.874928	-1.22184
SAT	Mrps33	0.872783	-0.685989
SAT	Pygl	0.870855	-1.16714
SAT	Spic	0.869163	1.52966
SAT	Il21r	0.868348	1.5922
SAT	Dixdc1	0.867808	-0.684864
SAT	Plbd1	0.865722	-0.647673
SAT	Ropn1l	0.865675	-0.895644
SAT	Bcl11a	0.86203	1.83103
SAT	Mrpl20	0.860294	-0.8316
SAT	Chchd2	0.859998	-0.994039
SAT	Hsh2d	0.856679	1.79608
SAT	Serpinb6b	0.855309	1.1423
SAT	Mis18bp1	0.854645	1.5175
SAT	1110001J03Rik	0.85321	-0.865715
SAT	Atp5o	0.851838	-1.01936
SAT	P2rx6	0.85157	-0.83345
SAT	Slc25a51	0.850198	-0.782971
SAT	Gpi1	0.850193	-0.712261
SAT	Blk	0.847541	1.8706
SAT	Zswim7	0.84704	-0.730886
SAT	4931406C07Rik	0.84645	-1.44449
SAT	Megf9	0.843567	-0.627246
SAT	Ank	0.843359	-0.663449
SAT	Cd52	0.842963	1.18117
SAT	Slc9a7	0.840452	1.3298
SAT	Coq9	0.839521	-1.13997
SAT	Ugp2	0.831639	-0.750794
SAT	Lipt1	0.831321	-0.931763
SAT	Zfp52	0.831074	0.970783
SAT	1700010I14Rik	0.828244	1.37119
SAT	Coq3	0.828075	-1.11332
SAT	Unc5cl	0.827238	1.1019
SAT	5430427O19Rik	0.825168	1.01374
SAT	Comt	0.824818	-1.07418
SAT	Fcrl1	0.824738	1.65361
SAT	Fam129c	0.824353	1.22583
SAT	Coa5	0.824227	-0.675802
SAT	H2-DMb2	0.824032	1.59131
SAT	Prdx1	0.823775	-0.817886
SAT	Pou2af1	0.823581	1.8737
SAT	Tmem126a	0.822953	-0.643564
SAT	Sla2	0.822811	1.1951
SAT	Epcam	0.822412	1.3632
SAT	Rtn4ip1	0.82206	-0.607739
SAT	Kcnk3	0.820124	-1.47852
SAT	Aldoa	0.818517	-1.11748
SAT	Siglecg	0.815044	1.67006
SAT	Grpel1	0.814578	-1.0458
SAT	Mreg	0.813528	1.10027
SAT	Cd3g	0.809127	1.23653
SAT	Cisd1	0.809118	-1.16718
SAT	Oxnad1	0.80855	-0.786673
SAT	Slc25a39	0.807833	-0.997128
SAT	Klk8	0.807627	1.04094
SAT	Ptp4a1	0.805263	-0.793393
SAT	Pgd	0.804814	-1.02593
SAT	Ndufa3	0.803915	-0.835594
SAT	Lrtm1	0.803429	-1.04199
SAT	Lax1	0.800167	1.61789
SAT	H2-M2	0.799076	1.5387
SAT	Gm561	0.798535	-0.850548
SAT	Rnf11	0.798516	-0.846262
SAT	Cd53	0.797257	1.04111
SAT	H2-Eb2	0.796349	2.0756
SAT	Tpmt	0.795992	-0.719217
SAT	Fam210a	0.795259	-0.788838
SAT	Mocs2	0.794662	-0.749401
SAT	Nfkbid	0.793309	1.36692
SAT	Ly6d	0.79295	1.03135
SAT	Stard4	0.7918	0.792352
SAT	Phlda3	0.791297	-0.969367
SAT	Coq10a	0.790922	-0.671122
SAT	5830411N06Rik	0.790905	1.57772
SAT	Gde1	0.787112	-1.13504
SAT	Coq6	0.787004	-0.682277
SAT	Prdx3	0.786431	-0.963891
SAT	Cd3d	0.786399	1.30209
SAT	Sell	0.786344	1.35053
SAT	Tspan32	0.785618	1.40491
SAT	Bag2	0.78524	-0.942128
SAT	Rgs1	0.784447	0.94814
SAT	Coasy	0.783969	-0.990791
SAT	Cd37	0.782833	1.47825
SAT	Slc36a2	0.782327	-1.41524
SAT	St8sia4	0.782166	1.03341
SAT	Lrrc27	0.781096	-1.09134
SAT	Gm14403	0.77963	-0.901239
SAT	Trim67	0.776007	-1.17872
SAT	Kynu	0.773577	1.75842
SAT	Kif20b	0.771742	1.0612
SAT	Dtl	0.770591	0.877381
SAT	Emc6	0.769739	-0.955635
SAT	Slamf1	0.769193	1.46323
SAT	Fam162a	0.767632	-0.779964
SAT	Dsp	0.766882	2.01623
SAT	Ulbp1	0.76563	0.999198
SAT	Psma3	0.765379	-0.748392
SAT	Tspan15	0.765235	-0.659655
SAT	Pax5	0.765079	1.68964
SAT	Tm7sf2	0.7619	-0.67543
SAT	Fam169b	0.761534	1.6726
SAT	Ralgps2	0.761153	1.75102
SAT	Lat	0.759907	1.2212
SAT	Apol7c	0.759851	1.6771
SAT	Tnfsf8	0.758511	1.26823
SAT	Slamf6	0.758203	1.59155
SAT	Phf11c	0.758066	1.06015
SAT	Chst3	0.75732	1.72039
SAT	Nkiras1	0.756984	-0.650324
SAT	Mmaa	0.75526	-0.625199
SAT	Chn1	0.753339	-1.13371
SAT	Rdh14	0.750506	-0.602867
SAT	Myb	0.745965	1.6093
SAT	Marco	0.745138	1.50254
SAT	Tjp3	0.74425	1.48762
SAT	Ddt	0.743445	-0.976623
SAT	Lgals2	0.742426	-1.21222
SAT	Msrb2	0.739916	-0.888209
SAT	Dnajc19	0.739826	-0.791288
SAT	Mrpl32	0.739538	-0.723076
SAT	Gimap9	0.739144	1.09955
SAT	Mrpl51	0.739111	-0.753061
SAT	Rnase6	0.737366	1.40734
SAT	Cox19	0.737037	-1.13536
SAT	Ddhd2	0.734187	-0.696759
SAT	Foxred1	0.733537	-0.600929
SAT	Ccr9	0.730918	1.24497
SAT	Mrps14	0.730821	-0.725591
SAT	Lat2	0.726122	1.35021
SAT	Sirt3	0.725104	-0.775765
SAT	Pgp	0.723499	-0.863884
SAT	Cenpq	0.723274	0.946862
SAT	Ehf	0.722994	1.43566
SAT	Cd72	0.722704	1.66218
SAT	Itgae	0.722355	1.20877
SAT	Ndufa11	0.721733	-0.960308
SAT	Osgepl1	0.720284	-0.601941
SAT	Mrpl41	0.717223	-0.730703
SAT	Nudt19	0.716827	-0.769846
SAT	Fam134b	0.715699	1.19778
SAT	Psma1	0.715642	-0.665191
SAT	Car2	0.714841	0.827589
SAT	Atp5h	0.712769	-0.767336
SAT	Ppp2r5a	0.712584	-1.00786
SAT	Hint3	0.712364	-0.891004
SAT	Dqx1	0.711964	0.864355
SAT	2300009A05Rik	0.711904	-0.946907
SAT	Tespa1	0.7107	1.34438
SAT	Cox4i1	0.710044	-0.991608
SAT	Mrpl53	0.708486	-0.788391
SAT	Scai	0.708475	0.622955
SAT	Isca1	0.708338	-0.780346
SAT	Emc2	0.707428	-0.623745
SAT	Car13	0.704926	-0.829092
SAT	Fcho1	0.703612	1.50275
SAT	Tomm7	0.70245	-0.632534
SAT	Grap2	0.701329	1.70692
SAT	Taldo1	0.700055	-1.0975
SAT	Gtf2ird1	0.698349	-0.612665
SAT	Vwa8	0.696559	-0.988271
SAT	Ccng1	0.69596	-0.606498
SAT	Chchd1	0.695943	-0.699622
SAT	Mrpl15	0.693211	-0.602316
SAT	Atp5b	0.69247	-1.01336
SAT	Cd209b	0.69082	0.632839
SAT	Psmb5	0.69073	-0.814959
SAT	Tia1	0.6904	0.75045
SAT	Cd8a	0.689139	1.28254
SAT	Ikzf2	0.688931	0.954686
SAT	Ccdc125	0.686128	0.907212
SAT	Psmb3	0.685927	-0.632261
SAT	Coq10b	0.685759	-0.983835
SAT	Strbp	0.685055	0.855658
SAT	Itk	0.68468	1.30349
SAT	Cd40	0.684445	1.13931
SAT	Atpaf2	0.684429	-0.912429
SAT	Stk17b	0.684367	1.1284
SAT	Mrpl16	0.683812	-0.761795
SAT	Atp5e	0.683584	-0.863522
SAT	B3gnt8	0.6827	1.39399
SAT	Fgd4	0.681709	-0.769167
SAT	1700037H04Rik	0.681619	-1.22016
SAT	Rasal3	0.680989	1.35061
SAT	Ndufa2	0.678853	-0.859853
SAT	Chchd4	0.676261	-0.836387
SAT	Timm17a	0.675232	-0.779001
SAT	Atp5a1	0.674978	-0.873697
SAT	Dusp2	0.674187	1.222
SAT	Rps27l	0.67343	-0.730672
SAT	Ikzf3	0.673226	1.85785
SAT	Pet100	0.670662	-0.716856
SAT	Afg3l2	0.666497	-0.613392
SAT	Gimap8	0.665267	1.37573
SAT	Dnaja3	0.665229	-0.769552
SAT	Hsdl2	0.664757	-0.930647
SAT	Gfm1	0.66331	-0.786057
SAT	Psmb7	0.66309	-0.757074
SAT	Rbpms2	0.662253	-0.979613
SAT	Tbc1d10c	0.659794	1.36478
SAT	Mrps16	0.659509	-0.754543
SAT	Cisd3	0.65888	-0.71775
SAT	Rexo2	0.658387	-0.676646
SAT	Spryd7	0.657956	-0.762046
SAT	Fosb	0.657944	1.80428
SAT	Dok3	0.654996	1.62173
SAT	Syt12	0.654214	-1.06889
SAT	Aldh3b2	0.653964	-0.965965
SAT	Ndufaf1	0.65289	-0.610067
SAT	Trim7	0.651308	1.6613
SAT	Zbtb26	0.650442	0.621488
SAT	Samd9l	0.647893	0.915398
SAT	Hspa9	0.645844	-0.939219
SAT	Zcchc7	0.643761	0.74589
SAT	Cox8a	0.643331	-1.06203
SAT	Mndal	0.640493	1.12891
SAT	Ndufa13	0.63632	-0.794269
SAT	Ndufb10	0.634208	-0.730631
SAT	Immt	0.633416	-0.762972
SAT	Gpx4	0.632672	-1.32926
SAT	Ptpn4	0.628546	-1.01866
SAT	Ctsb	-0.645775	-0.608428
SAT	Itga7	-0.646247	-0.876146
SAT	Ttyh2	-0.671941	-0.702348
SAT	Myoz1	-0.681383	-1.19745
SAT	Serpina3k	-0.687462	-3.40648
SAT	Cebpa	-0.697891	-0.895815
SAT	Myot	-0.709377	-0.653997
SAT	Slc25a25	-0.712351	-0.615738
SAT	Tmem216	-0.717399	-0.757136
SAT	Oaf	-0.731284	-0.99466
SAT	Pvalb	-0.74914	-1.03285
SAT	Dmkn	-0.754144	-1.1066
SAT	Nnmt	-0.768091	-0.635216
SAT	Klhl31	-0.769588	-1.01834
SAT	Rpl3l	-0.793215	-0.685379
SAT	Sod3	-0.799162	-0.64059
SAT	Mylk4	-0.821361	-1.15744
SAT	Slc38a4	-0.839952	-1.19091
SAT	Ppp1r14c	-0.84468	-1.28299
SAT	Smad6	-0.855938	-1.02096
SAT	Ldb3	-0.856634	-0.786923
SAT	Fkbp11	-0.857243	-0.825242
SAT	Hfe2	-0.869825	-0.742781
SAT	Asb5	-0.870113	-1.25708
SAT	Phkg1	-0.872395	-0.640192
SAT	Sdk2	-0.879936	-0.620968
SAT	Bhlhe41	-0.882539	-0.679116
SAT	Peg3	-0.883516	-0.909226
SAT	Trim54	-0.884078	-1.03799
SAT	Gnal	-0.887928	-0.985459
SAT	Pdgfrl	-0.894961	-0.625421
SAT	Fgfrl1	-0.905172	-0.689305
SAT	Fitm1	-0.906483	-0.651541
SAT	Usp13	-0.913314	-0.849541
SAT	Trf	-0.923068	-0.69208
SAT	Has1	-0.937534	-0.782852
SAT	Lmod3	-0.941496	-0.98291
SAT	Pgam2	-0.944294	-0.995275
SAT	Chac1	-0.945106	-0.883971
SAT	Eno3	-0.94685	-0.883449
SAT	Tnni2	-0.950783	-1.00197
SAT	Asb2	-0.969717	-0.610602
SAT	Nmrk2	-0.970618	-4.09873
SAT	Sulf2	-0.976836	-0.737181
SAT	Neb	-0.977916	-0.74244
SAT	Wnk2	-0.979086	-0.914145
SAT	Smyd1	-0.997398	-0.954733
SAT	Sgcg	-0.999665	-0.664268
SAT	Eva1c	-1.00146	-0.681173
SAT	Alx4	-1.00266	-0.926666
SAT	Vnn1	-1.00453	-1.29679
SAT	Nxpe5	-1.00669	-0.790953
SAT	Cfd	-1.00779	-0.619689
SAT	Crtac1	-1.01591	-1.84948
SAT	Pard6g	-1.02294	-0.81196
SAT	Ank1	-1.02628	-0.719232
SAT	Ky	-1.02913	-1.41533
SAT	Trim63	-1.02992	-1.65414
SAT	Fcgr4	-1.03156	-0.726915
SAT	Rab15	-1.05265	-0.614308
SAT	Lrrn2	-1.05493	-0.614518
SAT	Atp2a1	-1.05822	-0.629949
SAT	Rbm24	-1.0706	-0.848915
SAT	Slc6a13	-1.07109	-0.87395
SAT	Tnnt3	-1.08827	-1.04157
SAT	Lrp3	-1.08841	-0.941579
SAT	Eef1a2	-1.09064	-0.725951
SAT	Mypn	-1.10074	-0.659443
SAT	Postn	-1.10455	-1.07003
SAT	Angptl4	-1.10975	-1.00407
SAT	Casq1	-1.11224	-0.77221
SAT	Peg10	-1.11355	-0.670244
SAT	Fbxo40	-1.11922	-0.835151
SAT	Kcne1l	-1.12326	-0.690376
SAT	Ttn	-1.13682	-0.754408
SAT	Cacng1	-1.15529	-0.873831
SAT	Plin4	-1.1644	-0.663249
SAT	Mybpc2	-1.19545	-0.673709
SAT	3425401B19Rik	-1.20973	-0.73411
SAT	Anxa8	-1.21869	-0.748168
SAT	Jph2	-1.22036	-0.617817
SAT	Pygm	-1.23364	-1.07024
SAT	Ffar2	-1.24714	-1.13807
SAT	Ckm	-1.25629	-1.06173
SAT	Hrc	-1.26219	-0.702784
SAT	Acta1	-1.26497	-0.760744
SAT	Fbxo21	-1.26805	-0.826566
SAT	Myh4	-1.30421	-0.796731
SAT	Tpm2	-1.31823	-0.682059
SAT	Pck1	-1.32705	-1.26223
SAT	Lrg1	-1.33406	-0.790949
SAT	Slc5a6	-1.34336	-1.15149
SAT	Adcy5	-1.34592	-1.59719
SAT	Myom2	-1.36501	-0.938907
SAT	Fbln7	-1.37036	-0.986408
SAT	Creb3l3	-1.41738	-0.940221
SAT	Fam83a	-1.43816	-2.32406
SAT	Angptl2	-1.43979	-0.820213
SAT	Aldh1l2	-1.49147	-0.927346
SAT	Cacna1g	-1.50337	-1.15629
SAT	Clec4d	-1.56105	-0.81514
SAT	Kcnj12	-1.57571	-0.819612
SAT	Lamc3	-1.60967	-0.804562
SAT	Svep1	-1.61249	-0.611712
SAT	Abcg4	-1.63409	-0.753193
SAT	Ckmt2	-1.67735	-0.64803
SAT	Zfp703	-1.70522	-0.968787
SAT	Timp1	-1.77053	-0.911762
SAT	Lgi3	-1.85213	-0.740812
SAT	Tpbg	-2.07347	-0.722735
SAT	Dbp	-2.71359	-0.604447
VAT	Lipg	3.82392	-0.646575	fatty acids
VAT	Insig1	2.36856	-1.12886	fatty acids
VAT	Acly	2.35153	-1.63642	fatty acids
VAT	Abhd2	2.29724	-0.505273	fatty acids
VAT	Elovl6	2.09327	-2.29927	fatty acids
VAT	Fasn	1.67656	-1.38849	fatty acids
VAT	Scd2	1.342	-0.953858	fatty acids
VAT	Acaca	1.33753	-1.38588	fatty acids
VAT	Acat2	1.33016	-0.669005	fatty acids
VAT	Echdc1	1.29205	-0.764536	fatty acids
VAT	Tecr	1.19498	-0.646899	fatty acids
VAT	Alox12	1.08887	0.657347	fatty acids
VAT	Cyp1a1	1.06862	1.57891	fatty acids
VAT	C1qtnf9	0.983791	0.806795	fatty acids
VAT	Trib3	-1.24589	0.770532	fatty acids
VAT	Prkag3	-2.5306	0.731478	fatty acids
VAT	Sorl1	1.42498	-1.58777	thermogenesis
VAT	Adrb1	1.0593	-0.517869	thermogenesis
VAT	Cidea	-1.78236	-1.5271	thermogenesis
VAT	Cox7a1	-1.78548	-0.883217	thermogenesis
VAT	Ly6g5b	5.67492	0.653068
VAT	Ntsr2	5.43455	-0.783417
VAT	Slc38a5	5.40979	1.10421
VAT	Col6a4	4.91351	0.706546
VAT	Kcnj11	4.50972	1.07774
VAT	Armcx6	4.38299	0.63417
VAT	Derl3	3.55069	0.617605
VAT	2810459M11Rik	3.08948	-1.24898
VAT	Zap70	2.93275	1.18796
VAT	Actg2	2.74455	0.844499
VAT	Padi2	2.56565	0.695624
VAT	Jakmip1	2.38325	0.728116
VAT	Mup3	2.36972	-3.32881
VAT	Cldn1	2.31331	-0.844429
VAT	Col12a1	2.27958	-0.579899
VAT	Apod	2.12623	1.90475
VAT	Clcn5	2.12075	-1.12199
VAT	Slc6a12	2.08642	-0.952453
VAT	Esyt3	2.04435	-0.569097
VAT	Tceal3	2.03148	0.737266
VAT	Acss2	1.96356	-1.73095
VAT	Sp6	1.95962	1.3147
VAT	Mvd	1.90354	-0.572431
VAT	Hbegf	1.89269	0.627714
VAT	Serpina3j	1.88227	1.17355
VAT	Hephl1	1.84532	-2.35945
VAT	Chst10	1.84302	0.65317
VAT	H2-Q10	1.82725	-1.73661
VAT	Kirrel3	1.81676	0.653658
VAT	Hoxd9	1.80641	0.709284
VAT	Cd52	1.80404	0.647721
VAT	Lat	1.75668	0.649551
VAT	Fdps	1.73938	-1.01841
VAT	Fxyd3	1.69746	-0.800054
VAT	Cyp51	1.65486	-0.765488
VAT	Nsdhl	1.64723	-0.915759
VAT	Ldlr	1.63776	-0.937758
VAT	Pstpip1	1.57874	0.621741
VAT	Sult5a1	1.56958	0.634295
VAT	Art4	1.51417	1.0188
VAT	Itga8	1.49632	0.990233
VAT	Lonrf3	1.45944	0.737786
VAT	Ptger3	1.45452	-0.845871
VAT	Galnt6	1.43678	-0.565336
VAT	Cndp1	1.42047	0.63763
VAT	Kcnj2	1.39798	0.879557
VAT	Recql4	1.38282	-0.984452
VAT	Esm1	1.38153	0.945737
VAT	Mthfd1l	1.38103	0.71415
VAT	Tbx2	1.37547	0.72656
VAT	Gys2	1.3331	-1.81931
VAT	Amt	1.32336	0.664228
VAT	Fzd3	1.31243	-0.661693
VAT	Dpy19l4	1.30142	-0.800668
VAT	Anxa8	1.27739	-0.861954
VAT	Sdk2	1.26645	0.741605
VAT	Sgms2	1.26391	-0.81326
VAT	Slc25a1	1.24841	-1.04872
VAT	Lss	1.22289	-0.834888
VAT	Tle2	1.2173	0.748752
VAT	Serpina3k	1.20631	-2.64769
VAT	Lrp8	1.19618	-1.02322
VAT	Chchd10	1.18413	-1.3299
VAT	Ccdc166	1.18328	0.60953
VAT	Snx22	1.1545	1.26006
VAT	Agpat2	1.15314	-1.09269
VAT	Bhlhe40	1.13545	-0.738053
VAT	Nrip2	1.12783	0.672587
VAT	Thrsp	1.1241	-0.897014
VAT	Aldh1a7	1.10247	-0.643836
VAT	Slc35g1	1.08605	-0.675474
VAT	Aspg	1.07864	-0.630204
VAT	Bend5	1.05834	0.636666
VAT	Parm1	1.05595	-1.29448
VAT	Tnnt1	1.05536	1.19785
VAT	Kcnip3	1.05194	0.698052
VAT	Gbp11	1.03923	-0.698787
VAT	Bicd1	1.0389	-0.925776
VAT	Sema3d	1.03658	-0.503908
VAT	Lurap1	1.02256	-0.531037
VAT	Spry1	1.00975	0.633552
VAT	Tnfrsf11b	0.985486	-0.958477
VAT	Gstt3	0.974751	0.896775
VAT	Gpnmb	0.949217	0.950228
VAT	Tkt	0.939705	-1.19013
VAT	Acvr1c	-0.952963	-0.502657
VAT	Olfr1033	-0.963395	0.755321
VAT	Cited2	-0.971208	0.675796
VAT	Rgs7bp	-0.998783	-0.756633
VAT	Ppp1r1b	-1.00052	0.602902
VAT	Tcf7l1	-1.05503	0.625229
VAT	C530008M17Rik	-1.05673	-1.07167
VAT	Ms4a1	-1.07434	0.778374
VAT	Cdc6	-1.079	0.686799
VAT	Csf2rb2	-1.08204	0.766727
VAT	Pitpnm3	-1.10943	0.668972
VAT	Gabre	-1.11107	0.951156
VAT	Slfn4	-1.11312	-0.689108
VAT	Saa3	-1.12622	0.676158
VAT	Zfp831	-1.13037	0.910861
VAT	Peg3	-1.16813	-1.63686
VAT	Nmnat2	-1.16844	0.815482
VAT	Coro6	-1.17148	1.12841
VAT	Ypel4	-1.18136	1.05425
VAT	Zbtb16	-1.20082	0.642175
VAT	Cd79a	-1.20192	0.99544
VAT	Gnb4	-1.20211	0.691853
VAT	Tslp	-1.20491	0.903364
VAT	Deptor	-1.20634	-1.7231
VAT	Spp1	-1.20714	-1.00417
VAT	AI854703	-1.2188	0.726104
VAT	Lgals2	-1.22184	0.756444
VAT	Tespa1	-1.24161	0.758801
VAT	Pou2af1	-1.24225	1.01597
VAT	Cryab	-1.2511	-0.533009
VAT	Hif3a	-1.25491	1.15804
VAT	Fbn2	-1.25601	-1.62224
VAT	Dok7	-1.26379	1.46504
VAT	Stab2	-1.26777	0.716541
VAT	Txk	-1.29017	0.747477
VAT	Pfkfb3	-1.30305	-0.860147
VAT	Acta1	-1.3081	-1.2022
VAT	Amph	-1.313	1.04449
VAT	Ripply3	-1.31572	0.963212
VAT	Bcl11a	-1.33777	1.40124
VAT	Bmper	-1.34109	0.639565
VAT	Kcnq5	-1.35127	1.03893
VAT	Cd22	-1.36476	0.77638
VAT	Mylpf	-1.39991	0.928452
VAT	Fndc5	-1.41931	1.31287
VAT	Siglecg	-1.4725	0.883124
VAT	Cyr61	-1.49289	0.728925
VAT	Gdpd2	-1.55949	1.08377
VAT	Murc	-1.57135	0.984342
VAT	Atp2a1	-1.58471	1.85917
VAT	Grap2	-1.60059	0.780184
VAT	Klf14	-1.61426	-1.66774
VAT	Lrp3	-1.61519	-0.637591
VAT	Eya1	-1.62347	0.692165
VAT	Cd19	-1.64437	0.897251
VAT	Kcna6	-1.66379	0.626729
VAT	Txlnb	-1.674	0.637625
VAT	Spib	-1.68384	0.791091
VAT	D430019H16Rik	-1.70638	-0.531838
VAT	Dusp9	-1.72989	-0.815131
VAT	Hipk2	-1.74365	-1.37014
VAT	S100a9	-1.75987	-0.544793
VAT	Cnn1	-1.7779	0.645841
VAT	Fgf13	-1.80916	-0.63384
VAT	Slc9b2	-1.88744	0.752137
VAT	Cacna1i	-1.90265	0.876938
VAT	Ryr1	-1.91217	0.739088
VAT	Emp1	-1.92471	-0.560349
VAT	Hpca	-1.93675	1.45629
VAT	Tnni2	-1.96674	1.14696
VAT	Blk	-1.98178	0.816297
VAT	Sidt1	-2.04493	1.07946
VAT	Fam83a	-2.08633	-1.45082
VAT	Abcg2	-2.15091	0.749173
VAT	Mest	-2.17738	-1.8389
VAT	Serpina1d	-2.2482	-2.27291
VAT	Grb14	-2.29968	0.6133
VAT	Mmp12	-2.3552	0.679956
VAT	Bmp3	-2.57958	-0.678881
VAT	Tnnt3	-2.60836	1.09782
VAT	Synpo2	-2.61428	-1.02072
VAT	P2rx1	-2.65498	0.891528
VAT	Ptprz1	-2.98845	-0.941251
VAT	Fosb	-3.00072	1.55385
VAT	Hspb7	-3.03494	1.98284
VAT	Mybpc1	-3.15116	1.69219
VAT	Myh4	-3.29073	2.28107
VAT	Serpine1	-3.57251	-0.718766
BAT	Acat3	-1.66223	2.33636	fatty acids
BAT	Prkag2	-1.00286	1.55411	fatty acids
BAT	Ankrd23	-0.760935	1.37986	fatty acids
BAT	Alox12	1.57327	0.682973	fatty acids
BAT	Elovl3	3.51145	-5.80599	fatty acids
BAT	Acsl5	2.01384	-2.35027	fatty acids
BAT	Cyp1a1	1.79086	-2.10178	fatty acids
BAT	Acly	1.65244	-1.97628	fatty acids
BAT	Aacs	1.59608	-0.838496	fatty acids
BAT	Elovl6	1.57045	-2.41193	fatty acids
BAT	Elovl5	1.39737	-1.19602	fatty acids
BAT	Fasn	1.32874	-2.76912	fatty acids
BAT	Ptges	1.32607	-0.791812	fatty acids
BAT	Mfsd2a	1.28609	-4.02657	fatty acids
BAT	Acaca	1.17345	-1.90071	fatty acids
BAT	Myo5a	1.06778	-0.810116	fatty acids
BAT	Ces1f	-0.650631	-0.97493	fatty acids
BAT	Acacb	0.972039	-0.919119	fatty acids
BAT	Pnpla3	0.948859	-1.08741	fatty acids
BAT	Sesn2	-1.04853	-1.08124	fatty acids
BAT	Mtor	0.860406	-0.900861	fatty acids
BAT	Acsf2	0.835422	-1.38385	fatty acids
BAT	Lipa	0.775053	-0.780057	fatty acids
BAT	Acsf3	0.770483	-0.731285	fatty acids
BAT	Mgll	0.76173	-1.15946	fatty acids
BAT	Insig1	0.713705	-0.596246	fatty acids
BAT	Them4	0.698299	-0.79196	fatty acids
BAT	Echdc1	0.684709	-1.70216	fatty acids
BAT	Mlycd	0.659435	-1.04807	fatty acids
BAT	Acot4	-1.25379	-2.76154	fatty acids
BAT	Nr4a3	-3.00581	-4.11378	fatty acids
BAT	Acot1	-1.10109	-4.85609	fatty acids
BAT	Cxcr4	0.90739	1.94051	thermogenesis
BAT	Npr3	0.604785	1.65216	thermogenesis
BAT	Impdh1	-1.30339	1.4164	thermogenesis
BAT	Ccr2	-0.721779	1.16446	thermogenesis
BAT	Sctr	-1.14216	0.648887	thermogenesis
BAT	Sorl1	2.60276	-2.13255	thermogenesis
BAT	Acot11	2.02148	-2.36198	thermogenesis
BAT	Gnas	-1.28075	-0.664283	thermogenesis
BAT	Adcy3	1.20019	-1.37982	thermogenesis
BAT	Gadd45g	-1.5017	-0.855833	thermogenesis
BAT	Ucp1	0.870747	-2.27553	thermogenesis
BAT	Adrb3	0.635884	-1.17977	thermogenesis
BAT	Dio2	-0.963832	-3.30131	thermogenesis
BAT	Cpt2	0.609202	-1.09113	thermogenesis
BAT	Fras1	-3.61032	5.1759
BAT	Prnd	2.18136	4.23943
BAT	Plekhg6	-1.17731	3.8475
BAT	Cpne9	-1.2475	3.65339
BAT	Strip2	-1.49865	3.14208
BAT	Nnat	-2.18533	2.96496
BAT	Tusc3	-0.799062	2.8488
BAT	Clu	-0.610782	2.68488
BAT	Anxa8	-1.45087	2.67681
BAT	Apcdd1	-0.911472	2.66296
BAT	Phgdh	-1.03154	2.51654
BAT	Mki67	0.930327	2.47411
BAT	Dpysl4	-1.66842	2.46287
BAT	Gdf5	-0.942623	2.43103
BAT	Top2a	0.806415	2.33656
BAT	Tnc	-1.50895	2.30151
BAT	Arc	-1.13779	2.23131
BAT	Fam20c	-1.37766	2.15284
BAT	Kif11	0.782339	2.14031
BAT	Slc7a8	-0.846311	2.09922
BAT	Serpine1	-1.36511	2.08577
BAT	Sele	-1.75134	2.08253
BAT	Hspa12a	-0.790025	2.08156
BAT	Hes1	-1.14521	2.00281
BAT	Rab11fip4	-1.58464	1.98249
BAT	Zfr2	-0.894718	1.97534
BAT	Slc22a4	-0.903255	1.94278
BAT	Amotl2	-0.717977	1.93576
BAT	Btg2	-0.810892	1.92662
BAT	Cd247	-0.77822	1.91581
BAT	Nfe2l3	-0.95408	1.91424
BAT	Gadd45b	1.37765	1.87675
BAT	Pkdrej	-1.31608	1.84738
BAT	Heph	-0.591113	1.8405
BAT	Sec14l2	-0.728422	1.82607
BAT	Cldn5	-0.642454	1.81138
BAT	Fam65c	-1.19593	1.78218
BAT	Uhrf1	-1.00893	1.76392
BAT	Il1b	-0.667491	1.7519
BAT	Ckb	1.43544	1.75
BAT	Jun	-1.01275	1.72978
BAT	Kirrel3	-1.25644	1.71576
BAT	Ivns1abp	-1.51856	1.7092
BAT	Rab37	1.51693	1.70433
BAT	Fam134b	-0.727326	1.66044
BAT	Cdkn2b	1.01692	1.65486
BAT	Slc38a3	-0.932888	1.65393
BAT	Stxbp6	-0.887171	1.65016
BAT	Ephb1	-0.835784	1.64722
BAT	Cish	1.83068	1.64408
BAT	Plk2	0.631377	1.64234
BAT	Prob1	-0.739066	1.62462
BAT	Lfng	1.41552	1.61796
BAT	Eya1	-1.04418	1.59312
BAT	Zfp82	-0.647657	1.58722
BAT	Prdm1	1.09157	1.58559
BAT	Chst15	-0.621004	1.58473
BAT	Mpp3	-1.09094	1.56399
BAT	Rnf122	-0.745551	1.55655
BAT	Casp12	-0.722143	1.55202
BAT	Lrrc3b	1.31505	1.53982
BAT	Racgap1	1.0599	1.51873
BAT	Cdsn	-1.90583	1.51626
BAT	Nrarp	-0.82399	1.49044
BAT	Btbd11	-0.86268	1.4873
BAT	Kcna2	-1.08305	1.46964
BAT	Nts	-1.18128	1.46917
BAT	Zfp9	-0.733441	1.46386
BAT	Gm7694	-0.758056	1.46328
BAT	6430571L13Rik	1.42711	1.44398
BAT	Zfp956	-0.760302	1.44248
BAT	Rufy4	-0.9863	1.4231
BAT	Tmem45b	-1.11219	1.40634
BAT	Maff	2.93844	1.40614
BAT	Cytip	-0.818145	1.39345
BAT	Adcyap1r1	-0.779878	1.38606
BAT	Egr1	-0.892534	1.37157
BAT	Kit	1.63801	1.3713
BAT	Map3k8	0.680918	1.37111
BAT	Thbs1	-0.723022	1.36801
BAT	Hspb2	-0.783278	1.33881
BAT	Eya2	-0.664453	1.33473
BAT	Snhg11	-0.977624	1.32499
BAT	Fhl3	-0.94082	1.32045
BAT	Phldb1	-0.619688	1.29631
BAT	Cacng1	-1.31453	1.29519
BAT	Plaur	-0.954563	1.29442
BAT	Sncg	-1.2192	1.28848
BAT	Slc16a13	-0.743747	1.28167
BAT	Pola2	-0.711443	1.2753
BAT	Vash1	0.946669	1.27274
BAT	8430408G22Rik	0.731614	1.25948
BAT	Mlph	2.12373	1.25704
BAT	Adam22	-0.598128	1.25579
BAT	Gprin3	0.761003	1.25469
BAT	Vnn1	-0.896574	1.25073
BAT	Mfsd7b	-0.825987	1.24639
BAT	Pgm5	-0.630008	1.24212
BAT	Glb1l2	-0.989333	1.24032
BAT	Apold1	-0.696813	1.2367
BAT	Angpt1	-1.38192	1.22436
BAT	Pycard	-0.719618	1.21841
BAT	Bmp3	-1.11126	1.21722
BAT	Ddah1	-1.20877	1.21696
BAT	Dusp8	-1.154	1.21182
BAT	Mthfd2	0.957159	1.2071
BAT	2810474O19Rik	0.682903	1.20347
BAT	Adra1d	-0.850649	1.19788
BAT	Junb	-0.87308	1.19698
BAT	Dusp1	-1.19194	1.19574
BAT	Tfap4	-0.765129	1.19199
BAT	Mcm10	-1.38211	1.18787
BAT	Cd180	0.846347	1.17063
BAT	Gfra1	-1.19388	1.16567
BAT	Plxna3	-0.769778	1.16361
BAT	Ccno	-1.10535	1.16093
BAT	Cd276	-0.693182	1.15734
BAT	Epor	0.590489	1.15094
BAT	Ccl7	0.888547	1.1507
BAT	Slc6a8	-0.592613	1.1472
BAT	4931406P16Rik	-0.846132	1.14696
BAT	Gfra4	-1.40653	1.14297
BAT	Angptl4	-0.911979	1.14075
BAT	Fam212a	-0.598634	1.13429
BAT	Serpine2	-0.88069	1.13418
BAT	Kcnj11	0.736541	1.13093
BAT	Rnd2	1.69406	1.12967
BAT	Kcnj2	-1.23401	1.12775
BAT	Ier5	0.799795	1.11332
BAT	Gpx3	-0.905376	1.10918
BAT	Prx	-0.709837	1.1067
BAT	Egflam	-0.706901	1.10294
BAT	Angpt2	-0.623158	1.08982
BAT	Hhat	-0.630852	1.07801
BAT	Ppp1r15a	-0.988497	1.07723
BAT	Tacc2	-1.10992	1.06934
BAT	Prr5l	-0.831196	1.06831
BAT	Pcsk5	-1.0786	1.06452
BAT	Ccl2	1.51278	1.06329
BAT	Abcc8	2.8909	1.06169
BAT	Lrp4	-0.925881	1.0536
BAT	Tbx2	-0.645598	1.05043
BAT	Cfd	-0.8704	1.05006
BAT	Cyfip2	-0.917118	1.04599
BAT	Nup210	-0.742597	1.04455
BAT	Hdac11	1.1139	1.04116
BAT	Abat	-0.72446	1.04108
BAT	Ccnd1	0.800651	1.03701
BAT	Pak1	-0.82127	1.0273
BAT	Tmem132b	-2.22067	1.02533
BAT	Cxxc4	0.637318	1.02037
BAT	Sema4c	-0.651477	0.998967
BAT	Clec1a	0.605405	0.998488
BAT	Kng2	1.18751	0.998141
BAT	Ier2	-0.800133	0.992054
BAT	Jarid2	-0.743453	0.983625
BAT	Ugt1a6b	-0.666175	0.980387
BAT	Lat2	-0.76706	0.979798
BAT	Fgf16	-2.0093	0.976467
BAT	Plp2	-0.701458	0.97397
BAT	Lonrf3	0.903445	0.973111
BAT	Trpc6	0.706306	0.970893
BAT	Aqp1	-1.67251	0.967615
BAT	Fgf1	0.624876	0.96525
BAT	Cecr2	-0.735973	0.964116
BAT	Ccdc88c	-0.801987	0.959344
BAT	Inhbb	-0.720743	0.956406
BAT	Tmem231	-0.672271	0.938482
BAT	C4b	-0.655939	0.936045
BAT	Hmox1	0.817553	0.935676
BAT	Rnd1	0.605293	0.934042
BAT	Gipc3	1.15053	0.933034
BAT	Il2rg	0.639132	0.931254
BAT	Tgif1	-0.969226	0.921462
BAT	Rac2	-0.658922	0.919727
BAT	Nfkbiz	-0.603749	0.914691
BAT	Ophn1	-0.820592	0.912368
BAT	Mtmr14	-0.780557	0.90639
BAT	Il17re	-1.39014	0.904449
BAT	Nuak2	-0.768328	0.900389
BAT	Efemp1	-0.59949	0.888674
BAT	Btc	-2.13953	0.886566
BAT	Apoe	-1.1417	0.884556
BAT	6720489N17Rik	-0.813507	0.881117
BAT	Inmt	-0.766068	0.8797
BAT	Sdf2l1	1.01108	0.878162
BAT	Spint2	-0.696294	0.878107
BAT	Ctla2a	0.595841	0.875757
BAT	Pitpnc1	-0.75327	0.873335
BAT	Sp140	-0.97964	0.868484
BAT	Sh2d4a	-0.837153	0.857708
BAT	Dnph1	1.4979	0.851621
BAT	Sema4d	-0.918564	0.850784
BAT	Mlf1	-0.953033	0.849502
BAT	Rnf182	-2.59252	0.845963
BAT	Tes	-0.722189	0.844301
BAT	2310030G06Rik	0.654547	0.840857
BAT	Stk39	-0.77227	0.840478
BAT	Ccdc8	-0.820607	0.840345
BAT	Efna1	-0.61531	0.837807
BAT	Tspyl5	-0.880187	0.83721
BAT	Slc9a3r1	0.732211	0.832945
BAT	Nr2f1	-0.699271	0.831515
BAT	Steap4	-0.766722	0.822217
BAT	Opcml	-0.679629	0.820935
BAT	Cdh2	-0.802987	0.81621
BAT	Mettl24	-0.674286	0.802946
BAT	Rgag4	-0.734166	0.797362
BAT	Incenp	0.705327	0.790197
BAT	Dbf4	0.657044	0.789387
BAT	Lctl	-1.81529	0.785003
BAT	Ada	-0.761232	0.782694
BAT	Hic2	-1.59677	0.782044
BAT	Map2	-0.876933	0.781676
BAT	Irf2bpl	0.652701	0.781334
BAT	Sdcbp2	0.682314	0.778852
BAT	Pknox2	-0.735421	0.77764
BAT	Esrrb	1.06893	0.775073
BAT	Chrd	-0.809009	0.774033
BAT	Plcb2	1.02692	0.766282
BAT	Six4	-0.973697	0.764272
BAT	Abhd8	1.05396	0.763106
BAT	Dna2	-0.627747	0.758878
BAT	Gmfg	1.20014	0.754652
BAT	Srpx2	-0.611259	0.749455
BAT	Stac3	-0.920429	0.748388
BAT	Sh3bp4	1.21751	0.748122
BAT	Slc22a21	-0.830009	0.734841
BAT	Zfp619	-0.693599	0.734307
BAT	Smoc2	-0.668435	0.733469
BAT	Pkia	-0.901352	0.732946
BAT	Ramp1	-0.894318	0.731713
BAT	Casp7	-0.814722	0.731591
BAT	Rasd1	-2.07254	0.731234
BAT	Gngt2	-0.618277	0.729023
BAT	Asb10	-1.38063	0.724401
BAT	Smtnl2	-0.719167	0.721602
BAT	Cdh23	-1.09691	0.720139
BAT	Myh2	-1.38727	0.716965
BAT	Timp4	-0.73976	0.714871
BAT	Ptn	-0.978884	0.708089
BAT	Arhgdig	0.667351	0.699545
BAT	Adamtsl3	-1.74187	0.697356
BAT	Zim1	-0.747523	0.693845
BAT	Gpr182	-0.859709	0.691328
BAT	Trp53inp1	0.72251	0.688485
BAT	Osgin1	1.42221	0.686424
BAT	Fam46a	1.3198	0.686385
BAT	Il2ra	-0.907597	0.68237
BAT	Siva1	-0.641199	0.677846
BAT	Shisa4	-0.71357	0.676947
BAT	Pon1	-2.48074	0.675642
BAT	Bmp5	-0.895969	0.673213
BAT	Bhlhe41	-0.667649	0.670603
BAT	Tctn3	0.597756	0.667134
BAT	Art3	-1.3233	0.661569
BAT	Zfp747	-0.593435	0.660502
BAT	Myadml2	-0.829432	0.659324
BAT	Cth	-0.708585	0.657589
BAT	Tpm1	-0.754999	0.657582
BAT	Slc1a1	0.704191	0.655611
BAT	Fhod3	-1.01256	0.65512
BAT	Zfp799	0.742783	0.653783
BAT	Mcam	-1.48563	0.652731
BAT	B3galt4	-0.723106	0.652528
BAT	Mylk2	-1.06799	0.6525
BAT	Fmo2	0.8439	0.652489
BAT	Pim3	-0.928387	0.650503
BAT	Sema6a	-0.600752	0.645693
BAT	Ifi205	-0.675595	0.644678
BAT	Slc15a2	-1.35497	0.638971
BAT	Nostrin	0.616981	0.637586
BAT	Pcdhgc3	-1.17025	0.634747
BAT	Dbp	-2.2189	0.634126
BAT	F3	-1.20794	0.633392
BAT	Gas1	0.657113	0.631881
BAT	Fam131a	-0.778168	0.631748
BAT	Bcl7a	-0.607721	0.630419
BAT	Dmd	-0.891794	0.629289
BAT	Gabbr1	-0.640343	0.627526
BAT	Plin4	-0.845744	0.61509
BAT	Klf11	-1.08468	0.612304
BAT	Itm2a	-0.970534	0.611758
BAT	Spon1	-0.766255	0.608374
BAT	Lhpp	-0.855137	0.599957
BAT	Pvalb	-0.754964	0.596008
BAT	Myh1	-1.16358	0.595025
BAT	Net1	-0.870374	0.594425
BAT	Ttc25	4.23766	-1.58813
BAT	Adcy10	3.05204	-4.09583
BAT	Tmeff1	-1.00161	-0.597463
BAT	Atp1a3	2.73608	-0.762376
BAT	Kcng4	2.52583	-3.64426
BAT	Cela1	2.40617	-0.939457
BAT	Arhgef19	2.3874	-1.42578
BAT	Atp4b	2.34447	-4.19622
BAT	Fam57b	2.25811	-1.65398
BAT	Adprhl1	2.16847	-3.92133
BAT	Slc25a42	-1.09702	-0.615204
BAT	Cend1	2.16435	-2.04506
BAT	Me1	2.09982	-2.11367
BAT	Fdps	2.08719	-1.35765
BAT	Isyna1	2.06719	-1.27232
BAT	Npnt	2.05137	-2.43291
BAT	Mapk8ip1	2.0347	-0.713448
BAT	Rpl39l	1.97127	-0.743629
BAT	Slc2a5	1.96797	-2.02947
BAT	Dhcr24	1.96596	-0.960846
BAT	Orm3	1.9458	-1.5376
BAT	Dusp14	1.93489	-1.52387
BAT	Adap1	1.93139	-1.1397
BAT	Hyal2	-0.695993	-0.661208
BAT	Orm2	1.92031	-0.908548
BAT	Tesc	1.9134	-0.691499
BAT	Sc5d	1.82601	-0.690493
BAT	Katnal2	-0.611848	-0.667321
BAT	Slc29a2	-0.781544	-0.667657
BAT	Pfkl	1.78552	-0.872061
BAT	2010003K11Rik	1.72767	-1.38274
BAT	Pgd	1.72536	-1.73602
BAT	Sema4a	1.7187	-0.674485
BAT	Rxrg	-0.642458	-0.684964
BAT	Aspg	1.69548	-3.48627
BAT	Sqle	1.68256	-0.811111
BAT	Impa2	1.59129	-1.03119
BAT	Dtl	1.56724	-0.740378
BAT	Gpi1	1.56365	-0.593787
BAT	Fam131c	1.54491	-2.43421
BAT	Slc35g1	1.50424	-2.51532
BAT	Ccdc122	1.50059	-2.07481
BAT	Fah	1.49642	-1.03763
BAT	Pck1	-1.24875	-0.710734
BAT	Dhrs7	1.45467	-1.05673
BAT	Rap1gap	1.44611	-0.707582
BAT	Orm1	1.43851	-1.04395
BAT	Rfx7	-0.590948	-0.715775
BAT	Deptor	1.43574	-0.611792
BAT	Ncan	1.41632	-1.07671
BAT	Cdkn2c	-0.918584	-0.72105
BAT	Nipsnap1	1.40162	-0.633944
BAT	Prox2	-0.68297	-0.725086
BAT	Ffar2	-1.06583	-0.731136
BAT	Reep6	1.38818	-1.14161
BAT	Rims4	1.38757	-2.89523
BAT	Fibin	-0.99043	-0.734017
BAT	Fbp2	1.38086	-2.0258
BAT	Hapln4	1.38078	-1.66025
BAT	1700037H04Rik	1.37399	-1.00897
BAT	Ric3	1.35635	-1.00497
BAT	Dusp10	-1.29498	-0.747179
BAT	Atg9b	1.35333	-1.69183
BAT	Slc25a1	1.33725	-1.8908
BAT	Hk2	1.31571	-0.845572
BAT	Tnni1	-1.25951	-0.762057
BAT	Nsdhl	1.31528	-1.5528
BAT	Kcna1	-0.662529	-0.764182
BAT	Col20a1	-0.626243	-0.764859
BAT	Hoga1	1.31488	-0.694714
BAT	Pfkp	1.3108	-1.08365
BAT	Lss	1.30055	-0.992496
BAT	Plin2	1.29815	-1.40119
BAT	Fam217a	-0.815292	-0.78024
BAT	Sycp3	1.28633	-1.40267
BAT	Pth1r	1.27185	-0.927536
BAT	Egln3	1.26781	-1.42798
BAT	Eme2	-0.961785	-0.796025
BAT	Rom1	1.24166	-1.01111
BAT	Thrsp	1.23877	-1.15158
BAT	Pfkfb3	-1.33026	-0.797063
BAT	Tnnt1	-1.42359	-0.797857
BAT	Idi1	1.23396	-1.22977
BAT	Pmvk	1.23242	-1.49004
BAT	Slc38a10	1.22549	-0.699559
BAT	Skil	-0.60662	-0.811869
BAT	Hspb8	1.22163	-0.993442
BAT	G6pdx	1.20889	-1.25375
BAT	Spire1	1.20619	-0.882428
BAT	Sfrp5	-1.33687	-0.830766
BAT	Lbh	-0.819421	-0.836206
BAT	Gpd1	1.20265	-0.911224
BAT	Aldoa	1.20126	-0.878636
BAT	BC028528	1.19937	-0.699335
BAT	Mogat1	1.18559	-2.12257
BAT	Letm1	1.18187	-1.35856
BAT	Cldn1	-1.14424	-0.859336
BAT	Arsg	-0.760613	-0.865225
BAT	Ptch2	1.14782	-1.0737
BAT	Myl3	-1.26023	-0.876571
BAT	Garnl3	1.14152	-0.921492
BAT	Tlcd2	1.14032	-0.945172
BAT	Srl	-0.6261	-0.881991
BAT	Hebp2	1.13943	-1.87019
BAT	Gbp11	1.1235	-0.995563
BAT	Aldoart1	1.11833	-0.873666
BAT	Chst12	1.10421	-0.651592
BAT	Paqr9	1.09236	-1.84458
BAT	Slc25a34	1.09219	-3.5974
BAT	Atl2	-1.19856	-0.915774
BAT	Pcyt2	1.09156	-1.28214
BAT	Pafah2	1.08607	-1.12041
BAT	Cables1	1.08573	-1.53554
BAT	Bhlhb9	-1.34036	-0.922221
BAT	Fgf14	-0.893926	-0.924163
BAT	Hspa4l	1.08441	-0.69302
BAT	Cars2	1.08054	-0.600959
BAT	Txlng	-0.639957	-0.930159
BAT	Tfr2	1.07702	-2.2196
BAT	Il2rb	-1.02724	-0.939641
BAT	Agpat2	1.07458	-2.42227
BAT	Hsd17b7	1.06156	-0.640453
BAT	Kcnb1	1.04189	-0.697721
BAT	Dnajc22	1.02914	-2.38036
BAT	Tkt	1.02838	-1.20943
BAT	Rmdn3	1.02806	-1.16481
BAT	Hsd17b12	1.02423	-1.31771
BAT	Zfp185	-1.15337	-0.977597
BAT	Acss3	1.02354	-1.00347
BAT	Psph	1.01858	-1.1338
BAT	Hsph1	1.01809	-0.715968
BAT	Thg1l	1.0112	-0.972258
BAT	C1rl	1.00975	-1.35201
BAT	Fbxo44	1.00353	-0.960143
BAT	Slc26a10	0.974639	-1.12335
BAT	Tmem8	0.97072	-0.676441
BAT	Slc25a10	0.967971	-0.663014
BAT	Tspan15	0.967617	-0.739269
BAT	Myrip	0.96495	-0.925128
BAT	Pygl	0.955448	-1.24321
BAT	Lrfn3	0.948804	-1.34791
BAT	Ldha	0.946563	-0.918963
BAT	Mpc2	0.945421	-1.27059
BAT	Cox19	0.942421	-1.03833
BAT	Bmi1	0.931074	-0.711008
BAT	Mpc1	0.926811	-1.31383
BAT	Derl1	0.922975	-0.823001
BAT	Ropn1l	0.91359	-1.13621
BAT	Spaca1	0.906345	-1.21938
BAT	Acss2	0.905793	-1.98068
BAT	Snx10	0.900368	-1.60213
BAT	Ddhd2	0.900029	-1.7701
BAT	Morc4	0.890829	-0.666898
BAT	Taldo1	0.883677	-1.17227
BAT	Gpx8	-0.815373	-1.10743
BAT	Tmx4	0.883585	-0.719912
BAT	Vil1	0.87763	-1.74619
BAT	Golga7b	0.871492	-1.39413
BAT	Trib1	-1.29658	-1.13117
BAT	Ephb2	0.862413	-2.55451
BAT	Cdc25a	-0.918501	-1.14014
BAT	Ndufaf4	0.850387	-0.956205
BAT	Cpm	0.849351	-0.710409
BAT	Mcee	0.847704	-0.590663
BAT	Klhl25	-0.736894	-1.16083
BAT	Nradd	0.833493	-0.660597
BAT	Nsun3	0.831934	-0.843504
BAT	Myh7	-1.60101	-1.1738
BAT	Pgam1	0.829415	-0.60058
BAT	Srms	0.827643	-0.691508
BAT	Srxn1	0.823356	-0.612083
BAT	Fbxl2	0.821746	-2.6136
BAT	Vat1l	-2.35198	-1.21474
BAT	Tstd3	0.81584	-0.856251
BAT	Gys2	0.811216	-1.39734
BAT	Pdk1	0.809457	-0.742488
BAT	Hist1h2bc	0.805708	-0.626846
BAT	Rreb1	-0.70597	-1.25442
BAT	Kcnk2	0.801996	-1.09766
BAT	Cyb5b	0.800696	-1.14635
BAT	Fbxo33	0.796176	-0.6672
BAT	Apln	0.790631	-0.826912
BAT	Slc22a15	-0.858442	-1.27956
BAT	Timm8b	0.785431	-0.723061
BAT	Car14	-0.687371	-1.29859
BAT	Ube2cbp	-0.599706	-1.31215
BAT	Tubb4b	0.771289	-0.751771
BAT	Hmgcs2	-1.57233	-1.32721
BAT	Peg3	-1.17625	-1.33528
BAT	Rpp14	0.76727	-0.619839
BAT	Gm10638	-0.653197	-1.35459
BAT	Slco4a1	0.757902	-0.640813
BAT	Arl4a	-0.738739	-1.37926
BAT	Ccdc125	0.754818	-1.43009
BAT	Pcca	0.753329	-0.618097
BAT	Hsp90aa1	0.753197	-1.01927
BAT	Crispld1	0.749208	-0.721065
BAT	Trim65	0.744751	-0.67314
BAT	Gale	0.743882	-1.63129
BAT	Mmab	0.742605	-0.659284
BAT	Cdc34	0.742019	-0.982852
BAT	Gbp10	-0.720256	-1.42489
BAT	Syt12	0.734865	-2.07789
BAT	Spata17	0.733371	-1.25533
BAT	Igsf21	0.730005	-0.854392
BAT	Pdhb	0.727281	-1.08735
BAT	Sgk2	-3.62691	-1.4368
BAT	Cmbl	-0.849061	-1.45551
BAT	Ppargc1a	-0.906597	-1.46344
BAT	Sfxn5	0.726491	-1.2724
BAT	Tmem120a	-0.700586	-1.49345
BAT	Pmepa1	-1.64239	-1.49619
BAT	Otud6b	0.726443	-0.790798
BAT	Nudt19	0.725549	-0.713487
BAT	Letmd1	0.719643	-0.848114
BAT	Nhej1	0.719394	-0.703435
BAT	Rcor2	-0.590484	-1.55742
BAT	Fam117a	-0.982937	-1.55931
BAT	Nr4a2	-1.44147	-1.56483
BAT	Nudt7	0.711209	-0.904057
BAT	B3galt2	-1.39765	-1.63122
BAT	Tmem120b	0.695354	-0.622949
BAT	Mrps2	0.694558	-0.777895
BAT	Coasy	0.692693	-0.755299
BAT	Lactb2	0.688927	-0.960872
BAT	Hist2h3c1	0.68491	-1.05595
BAT	Tmem56	0.684834	-0.796228
BAT	3110001I22Rik	-1.07157	-1.79722
BAT	Psmc4	0.68303	-0.796995
BAT	Gramd1b	-1.48771	-1.84849
BAT	Sh3bgrl	0.682886	-0.808662
BAT	Atp6v0a2	0.678225	-1.20865
BAT	1810011H11Rik	0.677229	-1.07874
BAT	Timm22	0.672797	-1.11178
BAT	Lars2	-1.342	-1.95854
BAT	Pdhx	0.671923	-1.01179
BAT	4931406C07Rik	0.667271	-0.765092
BAT	Nxnl1	0.663265	-1.42534
BAT	Pigq	0.662421	-0.611289
BAT	Higd1a	0.661581	-0.757133
BAT	Mlx	0.65842	-0.877014
BAT	Vac14	0.657413	-0.731553
BAT	Coa3	0.656509	-0.628843
BAT	Fam83a	-1.87449	-2.10561
BAT	Serp1	0.65182	-0.683161
BAT	Ddt	0.650582	-1.043
BAT	Eif4e3	0.648406	-0.942424
BAT	Ppcs	0.646192	-0.615004
BAT	Rbks	0.638118	-0.693037
BAT	Rbp4	0.637794	-1.88847
BAT	Mmd2	-1.0141	-2.35424
BAT	Mrpl20	0.635608	-0.952027
BAT	Hsd3b7	0.632403	-0.795862
BAT	Ppp2r5b	0.630567	-0.635211
BAT	2310039H08Rik	0.629793	-0.60295
BAT	Chd3	0.629761	-2.01602
BAT	Zwint	0.62464	-0.674959
BAT	Poln	0.621747	-1.07536
BAT	Ube2f	0.614186	-0.755029
BAT	Tectb	-0.61526	-2.58887
BAT	Gapdh	0.61301	-0.905101
BAT	Fhdc1	0.609832	-1.02861
BAT	Bbc3	0.609631	-0.823322
BAT	Gm4841	-1.26912	-2.91967
BAT	Tmem171	-1.59684	-3.28396
BAT	Mrpl50	0.609538	-0.760453
BAT	Ptcd2	0.605671	-0.622981
BAT	Mrap	0.60052	-0.616561
BAT	Gipc1	0.599568	-0.614734
BAT	H2-Q10	0.599534	-1.39056
BAT	Zfand6	0.597844	-0.766062
BAT	Otop1	0.595628	-2.13489
Liver	Insig1	0.644562	0.733983	fatty acids
Liver	Lcn2	-0.973216	-0.743167	thermogenesis
Liver	4930452B06Rik	-0.708994	-1.04123
Liver	Abca8a	0.611177	0.629565
Liver	Acta2	0.774728	0.732684
Liver	Adamts6	0.850726	1.07418
Liver	Agap2	-0.690337	-1.3083
Liver	Asap2	-0.681919	-0.61529
Liver	Asns	-0.99246	-1.01249
Liver	Bcl6	-1.41868	-0.908821
Liver	Chrna2	-0.651336	-0.704198
Liver	Cidec	-1.27073	-0.731618
Liver	Clec2h	1.55958	0.643204
Liver	Cox7a1	-1.1534	0.815223	thermogenesis
Liver	Creld2	1.10363	-0.663909
Liver	Col12a1	-0.72324	-1.38777
Liver	Col15a1	-0.783397	-1.50217
Liver	Cyp2c39	-0.676072	0.683298
Liver	Cxcl1	0.630523	0.744079
Liver	Cxcl14	-1.29064	-0.648947
Liver	Cyp3a59	-0.695396	-0.715301
Liver	Derl3	1.74691	-2.4416
Liver	Cyp4a31	-1.3638	-0.820271
Liver	D630045J12Rik	-0.883065	-0.730561
Liver	Dsg1c	0.665415	0.952836
Liver	Gadd45g	-0.932422	2.86204	thermogenesis
Liver	Egr1	-0.744123	-1.36589
Liver	Gmds	0.71218	-0.898346
Liver	Fam89a	-0.787126	-0.678579
Liver	Gdf15	0.691729	1.11634
Liver	Hectd2	0.622631	-0.754189
Liver	Hamp2	0.920512	2.53799
Liver	Hap1	-0.671781	-0.591133
Liver	Hes1	0.744616	0.668739
Liver	Hsd17b6	0.684853	1.25948
Liver	Kcnc3	-0.618154	-0.679379
Liver	Klhl13	0.622081	0.61175
Liver	Map3k13	-1.00913	-1.18909
Liver	Mmd2	-1.16975	-1.5057
Liver	Moxd1	-2.1035	-7.83444
Liver	Mt2	-1.56154	2.14907
Liver	Mup8	-0.814437	-2.5175
Liver	Mup9	-1.24476	-7.25838
Liver	Myc	-1.28198	2.34532
Liver	Nucb2	1.119	-1.71243	fatty acids
Liver	Obp2a	0.949958	-1.99485
Liver	Orm3	-0.735458	-0.775625
Liver	Paqr9	-0.652438	-0.718398
Liver	Pdk4	-1.52513	0.824047	fatty acids
Liver	Pdzk1ip1	0.723906	0.792817
Liver	Plin4	-0.637688	1.06729
Liver	Pnpla3	-0.982946	1.8596	fatty acids
Liver	Prss8	1.02843	1.32817
Liver	Rsad1	-0.686924	-0.740328
Liver	Saa1	-0.590363	-0.874914
Liver	Serpinb1a	0.79798	1.01525
Liver	Slc13a5	-0.66022	-1.8943
Liver	Slc17a8	-0.777393	0.622836
Liver	Slc22a7	-0.972016	-1.98082
Liver	Sult1c2	0.750612	0.718858
Liver	Sult5a1	-0.679315	-1.50363
Liver	Trp53inp2	-0.882256	-0.610284
Liver	Tsku	-1.07419	-0.761616
Liver	Wsb1	0.636838	1.03181
Liver	Zbtb16	-0.614654	1.51098
Liver	Zbtb7c	-0.788303	-0.901768
Quadriceps	Aacs	2.21691	-0.867657	fatty acids
Quadriceps	Acaa1b	3.00565	-2.10014	fatty acids
Quadriceps	Acaca	2.36344	-1.08509	fatty acids
Quadriceps	Acly	3.01075	-1.15671	fatty acids
Quadriceps	Acsf2	1.18635	-0.629524	fatty acids
Quadriceps	Ces1f	1.72868	-0.785926	fatty acids
Quadriceps	Elovl6	4.56892	-2.04558	fatty acids
Quadriceps	Fasn	3.15686	-2.29355	fatty acids
Quadriceps	Pnpla3	1.96437	-1.2008	fatty acids
Quadriceps	Prkar2b	1.97907	-1.43619	fatty acids
Quadriceps	Scd1	3.21709	-2.79717	fatty acids
Quadriceps	Sox9	0.73547	-0.75711	fatty acids
Quadriceps	Adipoq	1.04438	-0.641305	thermogenesis
Quadriceps	Cidea	4.16607	-2.78532	thermogenesis
Quadriceps	Fabp4	1.37101	-0.616225	thermogenesis
Quadriceps	Id1	0.855602	-0.906619	thermogenesis
Quadriceps	5930403L14Rik	0.67874	-0.632119
Quadriceps	A530016L24Rik	2.30111	-0.886422
Quadriceps	Acp5	1.32092	-0.965583
Quadriceps	Acvr1c	1.48422	-0.713452
Quadriceps	Adora1	2.14864	-1.44673
Quadriceps	Agpat2	2.63502	-1.57387
Quadriceps	Aldh1a7	2.93892	-1.22787
Quadriceps	Aoc3	0.880186	-0.640601
Quadriceps	Apoc1	1.97954	-0.882
Quadriceps	Apold1	0.984287	-1.16668
Quadriceps	Asns	1.63402	-0.860639
Quadriceps	Atf3	0.954317	-0.733712
Quadriceps	Atp1a3	1.55941	-0.793703
Quadriceps	B3galt2	0.965424	-0.956468
Quadriceps	Car5b	1.65647	-0.653561
Quadriceps	Cd1d1	1.48973	-1.07766
Quadriceps	Cd209d	1.06057	-0.840682
Quadriceps	Cd83	1.19566	-0.84437
Quadriceps	Cdh4	-0.674368	0.658908
Quadriceps	Cdo1	2.02407	-0.95755
Quadriceps	Cebpa	1.02048	-0.719021
Quadriceps	Cfb	0.688328	-0.605307
Quadriceps	Chdh	1.73789	-1.15407
Quadriceps	Cidec	1.24028	-0.681758
Quadriceps	Clstn3	2.16869	-1.26492
Quadriceps	Cyp26b1	-1.69383	0.778334
Quadriceps	Cyp2f2	1.5773	0.617873
Quadriceps	Cyp51	1.03592	-0.638811
Quadriceps	Dnajb1	1.68703	-0.803341
Quadriceps	Doc2g	0.84508	-0.679582
Quadriceps	Dpf1	-0.76047	-0.786517
Quadriceps	Eps8l1	-0.652294	0.79106
Quadriceps	Fosl2	0.630272	-0.612313
Quadriceps	Fyb	0.965079	-1.3308
Quadriceps	G6pdx	1.57068	-0.728934
Quadriceps	Gadd45b	-0.909843	0.760741
Quadriceps	Gbp10	-0.635793	0.733267
Quadriceps	Gm4861	0.828533	0.615197
Quadriceps	Gpr137c	-0.682744	1.42153
Quadriceps	Gpr81	1.05988	-1.12289
Quadriceps	H2-Q10	2.49906	-2.16436
Quadriceps	Hist1h2be	-0.677582	0.64925
Quadriceps	Hoxd4	0.729027	0.759427
Quadriceps	Hsd17b12	1.59126	-0.826731
Quadriceps	Hsp90aa1	0.884648	-0.652337
Quadriceps	Hspa1a	1.38647	-0.905066
Quadriceps	Hspa1b	1.92024	-1.68568
Quadriceps	Itga10	0.711275	-0.852723
Quadriceps	Itgam	0.745471	-0.731122
Quadriceps	Itgb2	0.610701	-0.691607
Quadriceps	Kbtbd11	1.23941	-0.809344
Quadriceps	Kcnk3	2.88311	-1.84338
Quadriceps	Klf2	0.724112	-0.64616
Quadriceps	Klf4	0.878879	-0.741988
Quadriceps	Klhdc7a	1.72407	-1.81089
Quadriceps	Lars2	-0.959715	-1.1127
Quadriceps	Lonrf3	0.872163	1.07861
Quadriceps	Lypd6	-0.769106	0.795378
Quadriceps	Mki67	1.1382	-1.07293
Quadriceps	Mrap	1.89823	-1.7059
Quadriceps	Ms4a6b	1.04915	-0.710978
Quadriceps	Nat8l	3.03623	-1.78432
Quadriceps	Nedd9	0.839655	-0.831582
Quadriceps	Nhs	0.648915	0.613067
Quadriceps	Nrg4	1.66895	-0.9716
Quadriceps	Nt5e	0.699087	-0.656195
Quadriceps	Ntrk3	1.60423	-1.40867
Quadriceps	Orm1	2.46789	-1.33947
Quadriceps	Osbp2	0.728964	0.614359
Quadriceps	Pak1	-0.614855	0.593788
Quadriceps	Pck1	0.756609	-1.3802
Quadriceps	Pde3b	1.3678	-1.03929
Quadriceps	Pld5	-0.784806	0.912806
Quadriceps	Plin1	1.38568	-1.24428
Quadriceps	Ppp1r3b	4.17694	-1.05181
Quadriceps	Ptger3	2.35407	-0.865423
Quadriceps	Pth1r	1.07379	-0.78105
Quadriceps	Pygl	2.70986	-0.978177
Quadriceps	Rbp4	1.44538	-0.65688
Quadriceps	Retn	1.51716	-0.797329
Quadriceps	Rgl3	0.725225	-0.690688
Quadriceps	Rn45s	-1.10076	-1.41919
Quadriceps	Rnf24	0.608873	-0.658718
Quadriceps	Scand1	-0.602771	0.627966
Quadriceps	Sfxn1	1.42684	-0.620581
Quadriceps	Slc22a3	0.952944	-1.16626
Quadriceps	Slc25a1	2.47594	-1.39976
Quadriceps	Slc25a10	1.45837	-1.00069
Quadriceps	Slc25a25	0.852154	-1.99445
Quadriceps	Slc36a2	2.04441	-1.74736
Quadriceps	Sowahc	1.73769	-0.611447
Quadriceps	Stxbp2	0.780114	-0.637529
Quadriceps	Syt12	0.693929	-1.06574
Quadriceps	Tenm4	0.7873	-0.828394
Quadriceps	Thrsp	2.50744	-1.00556
Quadriceps	Tkt	2.42773	-1.38146
Quadriceps	Tlcd1	1.71339	-0.746015
Quadriceps	Tlcd2	0.823132	-0.712796
Quadriceps	Tlr7	0.650821	-0.612751
Quadriceps	Tmem45b	0.804085	-1.05083
Quadriceps	Tnfaip8l2	1.18256	-0.617275
Quadriceps	Ttyh1	-0.715594	-0.850088
Quadriceps	Tusc5	1.19006	-0.941689
Quadriceps	Utp14b	0.696086	-0.92352
Ileum	Acot12	0.76175	3.73543	fatty acids
Ileum	Apoa4	0.781005	2.63309	fatty acids
Ileum	Apoc2	1.11828	1.67307	fatty acids
Ileum	Fabp2	1.30798	0.82299	fatty acids
Ileum	Acot1	-0.895365	0.785657	fatty acids
Ileum	Cd36	0.633528	1.24221	thermogenesis
Ileum	Irf4	-0.629186	-1.26224	thermogenesis
Ileum	A430078G23Rik	-0.603208	-1.05691
Ileum	A630001G21Rik	-0.693021	-1.75693
Ileum	AB124611	-0.769982	-1.76869
Ileum	Abca12	-1.1801	-1.29066
Ileum	Ada	1.72256	0.692732
Ileum	Adh6a	0.767538	3.19155
Ileum	Aff3	-0.709917	-1.89551
Ileum	Agap2	-0.605433	-0.891981
Ileum	Apoc3	0.981147	2.16738
Ileum	Atf3	0.65785	-0.943251
Ileum	Banp	0.871049	-0.668653
Ileum	Aqp3	1.09872	2.14071
Ileum	Bmp8b	0.866678	-0.644404	thermogenesis
Ileum	Arg2	0.605704	1.25217
Ileum	Arhgap15	-0.625684	-1.01757
Ileum	Blk	-0.863783	-2.1596
Ileum	Bst1	1.36641	0.595396
Ileum	Btk	-0.615259	-1.84774
Ileum	Btla	-0.849053	-1.72899
Ileum	Carns1	-0.596659	-0.674467
Ileum	Ccr6	-1.18479	-1.6405
Ileum	Cd180	-0.808478	-1.77211
Ileum	Cd19	-0.649422	-2.07483
Ileum	Cd2	-0.79964	-1.41547
Ileum	Cd22	-1.03461	-1.874
Ileum	Cd247	-0.672208	-0.786907
Ileum	Cd28	-0.861265	-0.709511
Ileum	Cd37	-0.637936	-1.82392
Ileum	Cd4	-0.609783	-1.07502
Ileum	Cd6	-0.644893	-1.28448
Ileum	Cd79a	-0.659689	-1.89608
Ileum	Cd83	-0.642127	-1.43403
Ileum	Cend1	1.17258	-0.717072
Ileum	Chrm4	0.796393	-0.759084
Ileum	Cdr2	0.76899	0.770892
Ileum	Celf2	-0.612059	-0.7654
Ileum	Chst10	-0.648998	-1.38739
Ileum	Chst3	-0.827518	-2.34525
Ileum	Cilp	-0.714449	-1.77981
Ileum	Clcf1	-0.835793	-1.56096
Ileum	Clec2e	0.965642	0.808639
Ileum	Clec2i	-1.09111	-0.636144
Ileum	Clu	-0.657877	-1.75203
Ileum	Cox6b2	0.715697	-0.646684
Ileum	Cmah	-0.724175	-1.43779
Ileum	Cnr2	-0.806072	-1.96872
Ileum	Cpxm1	-0.795126	-1.70381
Ileum	Ctla2a	0.625064	-0.647029
Ileum	Cr2	-0.7859	-2.00751
Ileum	Csf2rb2	-0.707462	-0.92083
Ileum	Cxcl13	-0.842045	-1.82231
Ileum	Cxcr5	-0.802508	-2.08695
Ileum	Cyfip2	-0.730544	-1.31972
Ileum	Dbp	-1.65065	0.732391
Ileum	Cyp2d26	0.894102	0.664845
Ileum	Cyp4b1	0.88634	0.871216
Ileum	Enpp7	0.609826	2.43843
Ileum	Ephx2	0.909024	1.35847
Ileum	Extl1	-0.647058	-0.600425
Ileum	Fam65b	-0.661479	-1.57265
Ileum	Fcer2a	-0.833163	-1.77411
Ileum	Fcrl1	-0.802661	-1.9497
Ileum	Fcrl5	-0.893008	-2.60611
Ileum	Fcrla	-0.666913	-2.15171
Ileum	Fhdc1	-0.616402	-0.814386
Ileum	Fmnl1	-0.591804	-1.50533
Ileum	Foxq1	1.15457	0.68968
Ileum	Fras1	-0.821914	0.63926
Ileum	Foxred2	-0.691302	-0.833846
Ileum	Gm11127	1.03286	0.602051
Ileum	Gpr174	-0.912823	-2.02358
Ileum	Gstm3	-0.938645	1.40874
Ileum	Gpr183	-0.614411	-1.58682
Ileum	H2-DMb2	-0.754232	-1.77971
Ileum	H2-Eb2	-0.816536	-1.92979
Ileum	H2-M2	-0.676186	-0.618812
Ileum	H2-Ob	-0.72511	-1.89441
Ileum	Hlf	-1.02912	0.794106
Ileum	Hspa1a	1.69762	-1.64284
Ileum	Hspa1b	1.68417	-1.26575
Ileum	Hsph1	1.35574	-1.00719
Ileum	Haao	-1.07228	-2.00772
Ileum	Ikzf1	-0.638475	-1.6214
Ileum	Ikzf3	-0.758228	-1.55736
Ileum	Il22ra2	-0.649054	-1.16918
Ileum	Il9r	-1.1102	-1.71271
Ileum	Ipcef1	-0.65588	-1.30261
Ileum	Kbtbd8	0.595958	-0.670836
Ileum	Laptm5	-0.598315	-1.25731
Ileum	Lars2	-3.52589	0.617915
Ileum	Lct	1.36711	6.5962
Ileum	Lrat	0.699312	0.63407
Ileum	Ly86	-0.592022	-1.14283
Ileum	Lyl1	-0.648161	-1.77742
Ileum	Mal	1.2633	-0.92208
Ileum	Mef2c	-0.733863	-1.42537
Ileum	Mme	0.804181	0.690884
Ileum	Mndal	-0.618642	-0.795411
Ileum	Mrap	2.30103	-0.846475
Ileum	Ms4a4c	-1.12749	-1.98786
Ileum	Nrn1	-0.640797	1.00787
Ileum	Nxpe3	-0.815887	-0.859011
Ileum	Odf3b	0.8293	0.703954
Ileum	Pax5	-0.955603	-2.02299
Ileum	Pbx4	0.605903	-0.661988
Ileum	Pcdh15	-0.848326	-1.51962
Ileum	Pced1b	-0.671273	-1.29905
Ileum	Pck1	0.701832	1.98518
Ileum	Pik3cg	-0.698302	-0.741886
Ileum	Plb1	1.34633	2.7604
Ileum	Pnpla3	1.75204	-0.916551	fatty acids
Ileum	Pou2af1	-0.688697	-1.90597
Ileum	Pou2f2	-0.902296	-2.07772
Ileum	Ppm1j	0.761547	0.780692
Ileum	Prkcb	-0.618112	-1.49148
Ileum	Rasal1	-0.727935	-1.03169
Ileum	Rbp2	0.879202	1.62796
Ileum	Rdh7	0.88848	1.46245
Ileum	Rerg	-0.948197	0.608239
Ileum	Rgl3	1.1173	-0.727825
Ileum	Rrad	-0.597778	-0.759904
Ileum	Runx3	-0.628139	-1.07132
Ileum	S1pr3	-0.966538	-0.86611
Ileum	Samsn1	-0.616913	-1.3492
Ileum	Sardh	0.595955	0.621207
Ileum	Scd1	1.99646	-0.950543	fatty acids
Ileum	Sema4d	-0.610285	-1.09875
Ileum	Sgk1	0.898801	-0.670871
Ileum	Sh2d2a	-0.61102	-0.765629
Ileum	Sh3kbp1	-0.615449	-1.08336
Ileum	Siglecg	-0.72197	-2.19879
Ileum	Slamf6	-0.743512	-1.80722
Ileum	Slc16a10	0.667644	0.839091
Ileum	Slc25a45	0.7719	1.21047
Ileum	Slc25a53	-0.745724	-0.950592
Ileum	Slc28a2	1.44637	0.823103
Ileum	Slc29a4	-0.676757	-0.889224
Ileum	Slc2a2	3.66048	3.49165
Ileum	Slc2a7	0.965994	2.13186
Ileum	Slc36a2	1.50362	-1.40004
Ileum	Slc5a4a	0.796423	1.12215
Ileum	Slc5a4b	0.966262	2.37271
Ileum	Slc7a15	1.23291	0.672327
Ileum	Slc9a7	-0.619997	-1.58048
Ileum	Sp110	-0.677929	-1.01824
Ileum	Spib	-0.599107	-1.47365
Ileum	St8sia4	-0.62704	-0.861518
Ileum	Stap1	-0.803635	-1.88438
Ileum	Stra6	-0.700858	-1.7765
Ileum	Tifa	0.612362	0.819573
Ileum	Tigit	-0.971075	-1.13578
Ileum	Tlr7	-0.646853	-0.877343
Ileum	Tlr9	-1.07983	-1.41014
[truncated: 18 more rows]
