# Supplementary material for: Comparative multi-tissue profiling reveals extensive tissue-specificity in transcriptome reprogramming during thermal adaptation
Source: eLife. 2022 May 17;11:e78556. doi: 10.7554/eLife.78556 (PMC9113744; doi:10.7554/eLife.78556)
Supplement: Supplementary file 6. [file elife-78556-supp6.xlsx]

## Sheet: Suplementary File 6
BAT (Figure 2)
Thermogenic markers (10 C)						Thermogenic markers (34 C)						Fatty acid metabolism biomarkers (10 C)						Fatty acid metabolism biomarkers (34 C)
gene_id_name	logFC	logCPM	PValue	Padj		gene_id_name	logFC	logCPM	PValue	Padj		gene_id_name	logFC	logCPM	PValue	Padj		gene_id_name	logFC	logCPM	PValue	Padj
Acot11	2.02148	10.03	4.14595e-26	1.75298e-23		Cxcr4	1.94051	1.98416	4.29848e-09	2.71067e-07		Aacs	1.59608	9.46827	2.86485e-17	4.49138e-15		Acat3	2.33636	4.65292	1.51429e-13	2.95603e-11
Adcy3	1.20019	8.32911	1.4122e-10	8.87586e-09		Npr3	1.65216	6.78401	6.47483e-08	3.23972e-06		Acaca	1.17345	11.3807	3.17786e-10	1.85526e-08		Prkag2	1.55411	7.8552	3.31537e-07	1.38381e-05
Adrb3	0.635884	8.46516	0.000600348	0.00678271		Impdh1	1.4164	10.1694	2.96406e-06	9.2783e-05		Acacb	0.972039	11.6525	1.67102e-07	5.37229e-06		Ankrd23	1.37986	5.26824	5.86529e-06	0.000164099
Ccr2	-0.721779	3.93496	0.000245727	0.00317172		Ccr2	1.16446	3.33413	0.000157719	0.00265611		Acat3	-1.66223	1.45963	2.49081e-09	1.17811e-07		Alox12	0.682973	1.43495	0.0371582	0.173628
Cpt2	0.609202	9.05842	0.000991972	0.0101772		Sctr	0.648887	4.03341	0.0324101	0.158043		Acly	1.65244	12.8505	2.11661e-18	3.69164e-16		Insig1	-0.596246	7.99497	0.045822	0.199539
Cxcr4	0.90739	1.14293	0.00108662	0.0110026		Gnas	-0.664283	11.6654	0.0260962	0.13559		Acot1	-1.10109	2.80139	1.00286e-06	2.64517e-05		Acsf3	-0.731285	7.31021	0.0145447	0.0901683
Dio2	-0.963832	7.70987	2.50178e-07	7.75719e-06		Gadd45g	-0.855833	5.24252	0.00448634	0.0376179		Acot4	-1.25379	3.73734	1.20969e-09	6.09344e-08		Lipa	-0.780057	7.26204	0.00920117	0.0644544
Gadd45g	-1.5017	5.38149	1.00873e-14	1.20297e-12		Cpt2	-1.09113	9.07341	0.00028699	0.00432218		Acsf2	0.835422	5.41469	1.12624e-05	0.000225136		Ptges	-0.791812	3.49382	0.00945323	0.0657909
Gnas	-1.28075	6.6021	1.34093e-11	1.02802e-09		Adrb3	-1.17977	7.61423	9.17023e-05	0.00168153		Acsf3	0.770483	6.97549	3.67428e-05	0.000622176		Them4	-0.79196	3.71506	0.00927237	0.064823
Impdh1	-1.30339	7.89698	4.15843e-12	3.49534e-10		Adcy3	-1.37982	7.94639	5.27416e-06	0.00014966		Acsl5	2.01384	10.4081	6.02777e-26	2.47369e-23		Myo5a	-0.810116	6.51253	0.00691936	0.0524152
Npr3	0.604785	7.35865	0.00116717	0.0116909		Sorl1	-2.13255	5.16596	7.72385e-12	9.98451e-10		Alox12	1.57327	2.26919	4.22341e-11	2.96127e-09		Aacs	-0.838496	8.20177	0.00512554	0.0413628
Sctr	-1.14216	3.42751	4.28055e-08	1.56763e-06		Ucp1	-2.27553	11.9825	2.74724e-13	5.11389e-11		Ankrd23	-0.760935	6.34306	4.96851e-05	0.00080331		Mtor	-0.900861	7.66644	0.00267346	0.025202
Sorl1	2.60276	8.09186	3.61137e-40	4.58085e-37		Acot11	-2.36198	8.86602	4.15689e-14	9.2118e-12		Ces1f	-0.650631	6.43936	0.000523874	0.00609642		Acacb	-0.919119	10.8349	0.00216903	0.0215376
Ucp1	0.870747	13.0304	2.64158e-06	6.17462e-05		Dio2	-3.30131	6.40232	3.64883e-24	3.18383e-21		Cyp1a1	1.79086	4.2416	2.59322e-18	4.46706e-16		Ces1f	-0.97493	6.35226	0.00119448	0.0134377
												Echdc1	0.684709	7.08578	0.00024599	0.00317218		Mlycd	-1.04807	7.06118	0.000497098	0.00667307
												Elovl3	3.51145	8.68776	1.26839e-66	5.89929e-63		Sesn2	-1.08124	4.03663	0.000384382	0.00540419
												Elovl5	1.39737	8.51199	1.11456e-13	1.16928e-11		Pnpla3	-1.08741	8.72065	0.000301132	0.00446296
												Elovl6	1.57045	11.0397	7.90935e-17	1.21274e-14		Mgll	-1.15946	9.71772	0.000118639	0.00209131
												Fasn	1.32874	15.2244	1.24794e-12	1.16863e-10		Elovl5	-1.19602	6.72531	7.50128e-05	0.00142678
												Insig1	0.713705	9.13547	0.000118353	0.00168337		Acsf2	-1.38385	7.1498	5.03039e-06	0.000143618
												Lipa	0.775053	7.73361	3.10796e-05	0.000542746		Echdc1	-1.70216	7.85665	2.58933e-08	1.37976e-06
												Mfsd2a	1.28609	1.57815	6.32247e-07	1.775e-05		Acaca	-1.90071	11.194	6.28957e-10	4.90551e-08
												Mgll	0.76173	10.3213	3.90325e-05	0.000654592		Acly	-1.97628	11.1222	1.4296e-10	1.29601e-08
												Mlycd	0.659435	7.42212	0.000386848	0.00469364		Cyp1a1	-2.10178	2.60265	9.31541e-11	8.96913e-09
												Mtor	0.860406	8.92405	3.61933e-06	8.1716e-05		Acsl5	-2.35027	8.62243	5.41541e-14	1.14552e-11
												Myo5a	1.06778	8.00027	1.11172e-08	4.60818e-07		Elovl6	-2.41193	9.65609	1.33134e-14	3.20463e-12
												Nr4a3	-3.00581	2.90499	1.49234e-34	1.60174e-31		Acot4	-2.76154	2.97576	6.49521e-17	2.15904e-14
												Pnpla3	0.948859	9.46698	3.37305e-07	1.01213e-05		Fasn	-2.76912	14.2596	2.76988e-18	1.13736e-15
												Prkag2	-1.00286	6.82115	9.43208e-08	3.29839e-06		Mfsd2a	-4.02657	0.114782	1.64109e-18	7.15976e-16
												Ptges	1.32607	4.4288	2.725e-11	1.98031e-09		Nr4a3	-4.11378	0.985515	1.11755e-23	9.1777e-21
												Sesn2	-1.04853	4.74417	8.52554e-08	3.01921e-06		Acot1	-4.85609	3.24695	1.0326e-38	4.80539e-35
												Them4	0.698299	3.96305	0.000468214	0.00555054		Elovl3	-5.80599	5.42854	1.76312e-54	2.46149e-50
SAT (Figure 5)
Thermogenic markers (10 C)						Thermogenic markers (34 C)						Fatty acid metabolism biomarkers (10 C)						Fatty acid metabolism biomarkers (34 C)
gene_id_name	logFC	logCPM	PValue	Padj		gene_id_name	logFC	logCPM	PValue	Padj		gene_id_name	logFC	logCPM	PValue	Padj		gene_id_name	logFC	logCPM	PValue	Padj
Acaa2	1.42153	8.29895	1.25221e-05	0.00054554		Acaa2	-1.32598	6.92455	1.19988e-36	1.00026e-34		Aacs	0.876738	8.98364	0.0063833	0.0642457		Aacs	-0.877532	7.38951	2.6093e-17	4.68734e-16
Aco2	1.31729	9.91406	4.84312e-05	0.00157941		Aco2	-1.4375	8.64446	4.04654e-43	5.99938e-41		Abcd3	0.998029	7.55315	0.00198725	0.0271989		Abcd3	-1.06983	5.95913	3.7413e-24	1.2055e-22
Acot11	4.61652	6.67452	1.35879e-34	7.00502e-31		Acot11	-1.59306	2.96933	1.47064e-39	1.66424e-37		Abhd2	-0.879034	6.35042	0.00654049	0.0654302		Abhd2	0.67891	3.4751	7.65004e-09	5.81448e-08
Acot13	1.09858	5.27739	0.000777565	0.0136039		Acot13	-0.885324	4.167	1.11748e-15	1.72558e-14		Acaa1b	2.14856	4.87846	2.6925e-10	6.60987e-08		Acaa1b	-1.21542	4.51302	6.34163e-27	2.52832e-25
Actn3	-0.893299	6.73578	0.00567141	0.0587501		Actn3	-1.063	7.60153	1.52405e-24	5.10013e-23		Acaca	0.86839	10.5929	0.00685217	0.0676728		Acaca	-1.55907	8.97188	3.53206e-50	9.29647e-48
Arntl	1.04396	5.31425	0.00143173	0.0214151		Arntl	0.891437	3.29335	2.26863e-12	2.56233e-11		Acacb	1.00736	10.1252	0.00175784	0.0247828		Acacb	-1.33061	7.56196	3.0352e-37	2.683e-35
Cidea	2.68039	8.31414	3.05133e-15	2.14508e-12		Cidea	-2.89612	5.21409	1.62821e-148	1.27136e-144		Acadl	1.06233	8.5453	0.000993525	0.016243		Acadl	-1.39348	7.63787	1.66755e-40	2.02395e-38
Cox7a1	3.95944	6.38081	1.61371e-27	4.15962e-24		Cox7a1	-2.24951	3.24788	2.52258e-71	2.95457e-68		Acadm	0.917638	9.09646	0.00432857	0.0479553		Acadm	-1.2477	7.85121	4.89126e-33	3.12201e-31
Cs	0.684338	9.42032	0.0326963	0.192935		Cs	-0.898685	8.52462	3.22106e-18	6.19994e-17		Acadvl	1.30472	8.07578	5.83612e-05	0.00181612		Acadvl	-1.47169	7.54182	9.11105e-45	1.53544e-42
Cxcr4	0.73511	3.38544	0.0305347	0.185998		Cxcr4	0.842284	5.91367	1.51413e-14	2.09873e-13		Acat2	1.05795	6.76138	0.0010912	0.0174344		Acat2	-1.37505	5.432	4.95342e-38	4.75549e-36
Cyc1	1.1066	7.91754	0.000618124	0.0115041		Cyc1	-1.12585	7.19598	3.84762e-27	1.57571e-25		Acly	1.53794	11.8703	2.37702e-06	0.000143046		Acly	-1.53145	9.19998	1.46734e-48	3.43724e-46
Cycs	2.02271	4.86321	2.28216e-09	4.46784e-07		Cycs	-1.47956	5.19804	1.4363e-42	2.05155e-40		Acot1	0.962398	0.319025	0.0393355	0.217127		Acot1	-0.621876	0.446909	0.0178615	0.0465153
Decr1	1.23727	9.03163	0.000132437	0.00348346		Decr1	-1.37363	7.32707	2.54678e-39	2.78777e-37		Adtrp	1.10163	4.20234	0.000944481	0.0155729		Adtrp	-1.64698	2.35874	4.35463e-40	5.07498e-38
Dio2	3.25562	3.73281	2.69951e-18	2.45592e-15		Dio2	-4.03606	1.16985	5.1619e-41	6.43179e-39		Apoa1	1.63627	2.98035	2.88177e-06	0.000167554		Apoa1	-2.89777	0.499757	1.61223e-13	2.03813e-12
Dld	1.46932	8.45858	6.47977e-06	0.000318146		Dld	-1.00003	6.85139	9.10492e-22	2.39644e-20		Apoc2	1.44293	1.26265	0.000440019	0.00886112		Apoc2	-1.15647	1.26857	4.38164e-09	3.43622e-08
Dlst	0.924572	8.47883	0.00407054	0.0460534		Dlst	-0.804182	7.42889	8.3142e-15	1.18108e-13		Cbr4	1.05689	5.85019	0.00115087	0.0182183		Cbr4	-0.843115	4.01229	3.50972e-14	4.68462e-13
Etfdh	1.36868	8.03317	2.55759e-05	0.000974277		Etfdh	-1.21198	6.06165	1.6969e-30	8.9527e-29		Echdc1	1.2885	7.03618	7.46879e-05	0.00221159		Echdc1	-1.59256	6.40037	4.29695e-51	1.25066e-48
Fabp4	0.702186	13.8254	0.0283191	0.176892		Fabp4	-1.23581	12.5533	8.27701e-33	5.1842e-31		Eci1	0.816133	7.80683	0.0111423	0.095951		Eci1	-1.33769	6.08501	1.05487e-36	8.8886e-35
Fahd1	0.754628	4.17723	0.0228197	0.15575		Fahd1	-0.663759	3.82708	1.21244e-08	8.95095e-08		Elovl5	0.665661	7.63613	0.0381405	0.213805		Elovl5	-0.621918	5.76968	2.98646e-09	2.39172e-08
Fh1	0.883161	7.67415	0.00609368	0.0621667		Fh1	-0.928401	6.52292	6.45665e-19	1.31519e-17		Elovl6	2.37162	9.8281	1.50995e-12	5.18954e-10		Elovl6	-2.21064	6.84629	5.99964e-94	1.56157e-90
G0s2	0.847401	7.75845	0.00845619	0.0786431		G0s2	-0.805339	6.6544	1.49199e-14	2.07049e-13		Faah	0.831818	2.97531	0.0150901	0.118422		Faah	1.59171	3.05761	5.9216e-45	1.02751e-42
Gja1	1.30585	6.44253	6.26018e-05	0.00190966		Gja1	-0.90087	5.70502	1.53526e-16	2.54339e-15		Fabp3	4.42743	3.96154	1.21218e-28	3.74952e-25		Fabp3	-1.63306	1.93621	2.78044e-25	9.89845e-24
Hadh	0.762727	9.03371	0.0174349	0.13077		Hadh	-1.13952	7.9058	5.46132e-28	2.39572e-26		Ggt1	0.80494	1.0895	0.0407849	0.221715		Ggt1	1.13698	1.95181	9.36514e-13	1.09689e-11
Hadhb	1.44812	7.00956	9.19176e-06	0.00042823		Hadhb	-1.60938	6.6104	2.35582e-52	7.99785e-50		Hadha	1.19835	9.19722	0.000211328	0.00500845		Hadha	-1.32123	7.606	1.11298e-36	9.31125e-35
Idh3a	1.40126	8.57119	1.63747e-05	0.000677143		Idh3a	-1.41143	6.8468	4.88376e-41	6.15065e-39		Insig1	1.8277	9.23906	2.79017e-08	3.75242e-06		Insig1	-1.38449	5.95621	6.0473e-39	6.38099e-37
Idh3g	0.853731	8.2024	0.00793336	0.0752431		Idh3g	-0.957985	7.15451	3.32551e-20	7.57046e-19		Lipe	-0.628539	10.6691	0.0495206	0.249672		Lipe	-0.912532	10.2023	8.1259e-19	1.6452e-17
Igf1r	-0.635037	5.6114	0.0497607	0.250276		Igf1r	0.737095	4.80734	3.05789e-11	3.07429e-10		Mecr	0.767375	6.38464	0.0174093	0.130705		Mecr	-1.01682	5.40249	1.39036e-21	3.59881e-20
Lcn2	-1.66129	0.629342	0.000240759	0.0055328		Lcn2	-0.650638	8.89525	0.0029674	0.00924722		Ndufab1	1.08233	5.71708	0.000889314	0.0149664		Ndufab1	-1.15965	3.69611	2.4843e-24	8.13912e-23
Mrpl34	0.87722	5.15923	0.00717656	0.0700269		Mrpl34	-0.924186	4.37355	1.10915e-16	1.8532e-15		Ndufs6	1.01705	5.72492	0.00176488	0.0248368		Ndufs6	-1.04588	5.6041	9.72428e-23	2.78473e-21
Ndufa10	0.829211	8.11143	0.0099008	0.0882061		Ndufa10	-1.00518	6.64935	7.06494e-22	1.88492e-20		Pdk4	1.7576	7.85806	9.02909e-08	9.83408e-06		Pdk4	-2.22647	5.67464	1.80205e-93	4.2213e-90
Ndufa8	0.820808	6.26549	0.0110889	0.0957569		Ndufa8	-0.889682	6.01155	2.91322e-17	5.19742e-16		Plin5	1.74697	5.26556	1.60353e-07	1.57963e-05		Plin5	-2.47102	3.09619	1.25495e-89	2.67247e-86
Ndufa9	0.761756	7.42168	0.0178387	0.132705		Ndufa9	-0.973995	6.67851	1.12008e-20	2.64762e-19		Pnpla3	1.36764	9.89242	2.52029e-05	0.000967217		Pnpla3	-0.769498	7.97953	1.02423e-13	1.3161e-12
Ndufb8	1.02594	8.52835	0.00146357	0.0216401		Ndufb8	-1.20649	7.31529	7.97902e-31	4.2869e-29		Por	-1.03029	8.34767	0.00140134	0.0210419		Por	-0.674933	8.14187	5.82602e-11	5.6605e-10
Ndufs1	0.870952	8.24308	0.00677464	0.0670785		Ndufs1	-0.918786	6.84772	1.11588e-18	2.23797e-17		Ppara	0.838494	4.90841	0.0103572	0.0911173		Ppara	-1.77752	3.80953	5.6948e-57	3.10234e-54
Ndufs3	0.764167	6.01576	0.0180982	0.133862		Ndufs3	-0.916886	5.96306	3.10445e-18	5.98534e-17		Ptges	0.709781	6.84761	0.0274988	0.17466		Ptges	-1.12276	5.27569	1.42751e-25	5.14454e-24
Ndufv1	0.803133	8.14219	0.0124408	0.103279		Ndufv1	-0.952532	7.15126	5.80096e-20	1.28926e-18		Scd1	1.03628	15.5628	0.00129006	0.0196961		Scd1	-1.98219	13.9329	2.7663e-78	4.05004e-75
Pdha1	1.08349	9.38434	0.00078308	0.0136846		Pdha1	-1.1335	8.18574	8.98275e-28	3.87515e-26		Slc27a2	3.18337	3.72654	7.8963e-18	6.78468e-15		Slc27a2	-3.94798	1.40097	7.51496e-119	2.51483e-115
Pgk1	1.15408	3.01571	0.000921725	0.0153284		Pgk1	-0.893223	5.91915	2.70833e-17	4.85035e-16
Pkm	0.994023	8.773	0.00203432	0.0276961		Pkm	-0.974979	9.02714	3.91429e-21	9.7338e-20
Slc25a20	1.77149	7.659	7.29882e-08	8.23967e-06		Slc25a20	-1.52932	5.42822	4.4077e-46	8.53308e-44
Ucp1	7.33446	9.38506	5.96915e-67	9.23188e-63		Ucp1	-8.09085	2.23677	0	0
