# Supplementary material for: Comparative multi-tissue profiling reveals extensive tissue-specificity in transcriptome reprogramming during thermal adaptation
Source: eLife. 2022 May 17;11:e78556. doi: 10.7554/eLife.78556 (PMC9113744; doi:10.7554/eLife.78556)
Supplement: Supplementary file 7. [file elife-78556-supp7.xlsx]

## Sheet: Suplementary File 7
Treatment	GO Term	Annotated	Significant	Gene_ratio	Expected	P-value (weightFisher)	direction	Tissue
exposure to 34°C	cell fate determination	26	5	19.2308	0.93	0.00204	up	ileum
exposure to 34°C	cell fate determination	18	4	22.2222	0.63	0.00310	up	liver
exposure to 34°C	cell fate determination	23	8	34.7826	0.9	1.6e-06	up	VAT
exposure to 34°C	cell fate determination	23	9	39.1304	3.5	0.00463	up	BAT
exposure to 34°C	cell fate determination	23	10	43.4783	4.3	0.00546	up	SAT
exposure to 34°C	adaptive immune response	329	88	26.7477	19	4.9e-14	down	ileum
exposure to 34°C	sensory perception of pain	86	8	9.30233	3.38	0.00564	up	VAT
exposure to 34°C	sensory perception of pain	66	7	10.6061	2.32	0.00356	up	liver
exposure to 34°C	sensory perception of pain	105	14	13.3333	3.76	0.00809	up	ileum
exposure to 34°C	sensory perception of pain	84	30	35.7143	12.78	6.3e-05	up	BAT
exposure to 34°C	adaptive immune response	281	20	7.11744	9.87	0.00093	up	liver
exposure to 34°C	adaptive immune response	328	40	12.1951	12.9	1.0e-14	up	VAT
exposure to 34°C	adaptive immune response	286	70	24.4755	43.53	0.00017	up	BAT
exposure to 34°C	adaptive immune response	328	168	51.2195	61.38	9.7e-24	up	SAT
exposure to 34°C	positive regulation of ERK1 and ERK2 cascade	138	12	8.69565	4.85	0.00337	up	liver
exposure to 34°C	positive regulation of ERK1 and ERK2 cascade	159	14	8.80503	6.25	0.00402	up	VAT
exposure to 34°C	positive regulation of ERK1 and ERK2 cascade	164	21	12.8049	9.47	0.00049	down	ileum
exposure to 34°C	positive regulation of ERK1 and ERK2 cascade	150	36	24	22.83	0.00302	up	BAT
exposure to 34°C	positive regulation of ERK1 and ERK2 cascade	159	48	30.1887	29.75	0.00030	up	SAT
exposure to 34°C	B cell activation	184	14	7.6087	6.46	0.00721	up	liver
exposure to 34°C	B cell activation	214	24	11.215	8.42	0.00946	up	VAT
exposure to 34°C	B cell activation	212	67	31.6038	12.24	1.7e-06	down	ileum
exposure to 34°C	B cell activation	214	109	50.9346	40.05	0.00029	up	SAT
exposure to 34°C	B cell receptor signaling pathway	47	12	25.5319	1.85	1.4e-05	up	VAT
exposure to 34°C	B cell receptor signaling pathway	43	18	41.8605	6.54	0.00603	up	BAT
exposure to 34°C	B cell receptor signaling pathway	46	25	54.3478	2.66	3.7e-13	down	ileum
exposure to 34°C	B cell receptor signaling pathway	47	34	72.3404	8.8	8.0e-12	up	SAT
exposure to 34°C	exogenous drug catabolic process	12	2	16.6667	0.08	0.00281	up	brain
exposure to 34°C	exogenous drug catabolic process	40	8	20	1.4	6.2e-05	up	liver
exposure to 34°C	exogenous drug catabolic process	24	8	33.3333	0.86	1.1e-06	up	ileum
exposure to 34°C	negative regulation of extrinsic apoptotic signaling pathway in absence of ligand	29	5	17.2414	1.14	0.00501	up	VAT
exposure to 34°C	negative regulation of extrinsic apoptotic signaling pathway in absence of ligand	25	10	40	3.8	0.00237	up	BAT
exposure to 34°C	negative regulation of extrinsic apoptotic signaling pathway in absence of ligand	29	12	41.3793	5.43	0.00392	up	SAT
exposure to 34°C	negative regulation of Notch signaling pathway	29	5	17.2414	1.14	0.00501	up	VAT
exposure to 34°C	negative regulation of Notch signaling pathway	29	10	34.4828	4.41	0.00815	up	BAT
exposure to 34°C	negative regulation of Notch signaling pathway	29	12	41.3793	5.43	0.00392	up	SAT
exposure to 34°C	negative regulation of transcription by RNA polymerase II	626	35	5.59105	21.98	0.00513	up	liver
exposure to 34°C	negative regulation of transcription by RNA polymerase II	698	48	6.87679	27.45	0.00025	up	VAT
exposure to 34°C	negative regulation of transcription by RNA polymerase II	698	157	22.4928	130.62	0.00280	up	SAT
exposure to 34°C	peripheral nervous system development	56	5	8.92857	2.2	0.00832	up	VAT
exposure to 34°C	peripheral nervous system development	53	14	26.4151	8.07	0.00888	up	BAT
exposure to 34°C	peripheral nervous system development	56	15	26.7857	10.48	0.00928	up	SAT
exposure to 34°C	xenobiotic metabolic process	69	11	15.942	2.47	0.00232	up	ileum
exposure to 34°C	xenobiotic metabolic process	89	17	19.1011	3.12	1.7e-08	up	liver
exposure to 34°C	xenobiotic metabolic process	51	14	27.451	7.76	0.00411	up	BAT
exposure to 34°C	G protein-coupled receptor signaling pathway	371	33	8.89488	14.59	4.4e-05	up	VAT
exposure to 34°C	G protein-coupled receptor signaling pathway	443	55	12.4153	25.58	4.5e-05	down	ileum
exposure to 34°C	G protein-coupled receptor signaling pathway	361	97	26.8698	54.94	5.7e-07	up	BAT
exposure to 34°C	G protein-coupled receptor signaling pathway	371	116	31.2668	69.43	4.6e-05	up	SAT
exposure to 34°C	neuropeptide signaling pathway	16	4	25	0.63	0.00295	up	VAT
exposure to 34°C	neuropeptide signaling pathway	16	8	50	2.44	0.00116	up	BAT
exposure to 34°C	positive regulation of cytosolic calcium ion concentration	195	16	8.20513	5.88	0.00119	down	QC
exposure to 34°C	positive regulation of cytosolic calcium ion concentration	223	25	11.2108	8.77	0.00045	up	VAT
exposure to 34°C	positive regulation of cytosolic calcium ion concentration	241	37	15.3527	13.92	0.00598	down	ileum
exposure to 34°C	positive regulation of cytosolic calcium ion concentration	210	59	28.0952	31.96	1.8e-05	up	BAT
exposure to 34°C	positive regulation of cytosolic calcium ion concentration	223	75	33.6323	41.73	0.00571	up	SAT
exposure to 34°C	positive regulation of phosphatidylinositol 3-kinase signaling	60	7	11.6667	2.36	0.00889	up	VAT
exposure to 34°C	positive regulation of phosphatidylinositol 3-kinase signaling	58	9	15.5172	3.35	0.00568	down	ileum
exposure to 34°C	positive regulation of phosphatidylinositol 3-kinase signaling	55	18	32.7273	8.37	0.00090	up	BAT
exposure to 34°C	positive regulation of phosphatidylinositol 3-kinase signaling	60	25	41.6667	11.23	3.2e-05	up	SAT
exposure to 34°C	positive regulation of T cell proliferation	65	8	12.3077	2.28	0.00626	up	liver
exposure to 34°C	positive regulation of T cell proliferation	70	21	30	10.65	0.00287	up	BAT
exposure to 34°C	positive regulation of T cell proliferation	81	28	34.5679	4.68	1.5e-10	down	ileum
exposure to 34°C	positive regulation of T cell proliferation	82	45	54.878	15.34	1.4e-06	up	SAT
exposure to 34°C	positive regulation of tyrosine phosphorylation of STAT protein	38	7	18.4211	1.49	0.00061	up	VAT
exposure to 34°C	positive regulation of tyrosine phosphorylation of STAT protein	38	11	28.9474	2.19	6.3e-06	down	ileum
exposure to 34°C	positive regulation of tyrosine phosphorylation of STAT protein	32	13	40.625	4.87	0.00045	up	BAT
exposure to 34°C	positive regulation of tyrosine phosphorylation of STAT protein	38	17	44.7368	7.11	0.00021	up	SAT
exposure to 34°C	regulation of B cell receptor signaling pathway	17	4	23.5294	0.67	0.00374	up	VAT
exposure to 34°C	regulation of B cell receptor signaling pathway	17	9	52.9412	0.98	1.1e-07	down	ileum
exposure to 34°C	regulation of B cell receptor signaling pathway	15	8	53.3333	2.28	0.00067	up	BAT
exposure to 34°C	regulation of B cell receptor signaling pathway	17	11	64.7059	3.18	3.9e-05	up	SAT
exposure to 34°C	response to bacterium	385	27	7.01299	13.52	5.0e-05	up	liver
exposure to 34°C	response to bacterium	471	72	15.2866	27.2	0.00298	down	ileum
exposure to 34°C	response to bacterium	392	108	27.551	59.66	1.1e-05	up	BAT
exposure to 34°C	T cell differentiation	237	29	12.2363	9.32	0.00435	up	VAT
exposure to 34°C	T cell differentiation	235	58	24.6809	13.57	0.00077	down	ileum
exposure to 34°C	T cell differentiation	212	57	26.8868	32.27	0.00424	up	BAT
exposure to 34°C	T cell differentiation	237	120	50.6329	44.35	2.5e-08	up	SAT
exposure to 34°C	immune response	891	16	1.79574	11.05	0.00430	down	brain
exposure to 34°C	immune response	1008	191	18.9484	58.2	9.6e-07	down	ileum
exposure to 34°C	innate immune response	482	71	14.7303	27.83	3.3e-08	down	ileum
exposure to 34°C	B cell differentiation	109	13	11.9266	4.29	0.00584	up	VAT
exposure to 34°C	B cell differentiation	109	34	31.1927	6.29	9.1e-07	down	ileum
exposure to 34°C	B cell differentiation	109	62	56.8807	20.4	9.5e-10	up	SAT
exposure to 34°C	cardiac muscle contraction	113	6	5.30973	1.4	0.00027	down	brain
exposure to 34°C	cardiac muscle contraction	101	19	18.8119	10.56	0.00632	down	SAT
exposure to 34°C	regulation of skeletal muscle contraction	10	2	20	0.12	0.00645	down	brain
exposure to 34°C	regulation of skeletal muscle contraction	13	5	38.4615	1.36	0.00778	down	SAT
exposure to 34°C	cytokine-mediated signaling pathway	262	30	11.4504	15.13	0.00186	down	ileum
exposure to 34°C	cytokine-mediated signaling pathway	245	64	26.1224	37.29	2.7e-06	up	BAT
exposure to 34°C	cytokine-mediated signaling pathway	265	72	27.1698	49.59	0.00201	up	SAT
exposure to 34°C	defense response to Gram-positive bacterium	71	16	22.5352	4.1	2.1e-06	down	ileum
exposure to 34°C	defense response to Gram-positive bacterium	52	15	28.8462	7.91	0.00883	up	BAT
exposure to 34°C	defense response to Gram-positive bacterium	59	24	40.678	11.04	7.3e-05	up	SAT
exposure to 34°C	defense response to virus	185	22	11.8919	10.68	0.00364	down	ileum
exposure to 34°C	defense response to virus	176	41	23.2955	26.79	0.00144	up	BAT
exposure to 34°C	defense response to virus	181	54	29.8343	33.87	0.00731	up	SAT
exposure to 34°C	dendritic cell differentiation	29	9	31.0345	1.67	0.00680	down	ileum
exposure to 34°C	dendritic cell differentiation	27	10	37.037	4.11	0.00018	up	BAT
exposure to 34°C	dendritic cell differentiation	33	17	51.5152	6.18	3.9e-05	up	SAT
exposure to 34°C	response to stimulus	5368	1002	18.6662	816.98	0.00186	up	BAT
exposure to 34°C	signal transduction	3508	843	24.0308	656.45	0.00329	up	SAT
exposure to 34°C	signal transduction	3382	694	20.5204	514.72	0.00226	up	BAT
exposure to 34°C	intracellular signal transduction	1971	479	24.3024	368.83	0.00035	up	SAT
exposure to 34°C	regulation of cell migration	730	187	25.6164	111.1	0.00231	up	BAT
exposure to 34°C	heterotypic cell-cell adhesion	45	11	24.4444	2.6	0.00039	down	ileum
exposure to 34°C	heterotypic cell-cell adhesion	41	13	31.7073	6.24	0.00461	up	BAT
exposure to 34°C	heterotypic cell-cell adhesion	45	23	51.1111	8.42	1.8e-05	up	SAT
exposure to 34°C	regulation of cell migration	759	185	24.3742	142.03	0.00097	up	SAT
exposure to 34°C	immunological synapse formation	14	7	50	0.81	5.0e-06	down	ileum
exposure to 34°C	immunological synapse formation	14	7	50	2.13	0.00239	up	BAT
exposure to 34°C	immunological synapse formation	15	10	66.6667	2.81	6.2e-05	up	SAT
exposure to 34°C	inflammatory response	445	34	7.64045	13.42	0.00637	down	QC
exposure to 34°C	inflammatory response	532	85	15.9774	30.72	8.1e-07	down	ileum
exposure to 34°C	inflammatory response	478	143	29.9163	72.75	4.5e-08	up	BAT
exposure to 34°C	inflammatory response	531	172	32.3917	99.37	6.5e-09	up	SAT
exposure to 34°C	T cell activation involved in immune response	75	20	26.6667	4.33	0.00204	down	ileum
exposure to 34°C	positive regulation of cell population proliferation	694	169	24.3516	105.62	0.00031	up	BAT
exposure to 34°C	negative regulation of cell population proliferation	545	142	26.055	101.99	0.00844	up	SAT
exposure to 34°C	leukocyte aggregation	12	5	41.6667	0.69	0.00036	down	ileum
exposure to 34°C	leukocyte aggregation	14	8	57.1429	2.13	0.00036	up	BAT
exposure to 34°C	leukocyte aggregation	14	9	64.2857	2.62	0.00022	up	SAT
exposure to 34°C	axon guidance	173	54	31.2139	32.37	0.00093	up	SAT
exposure to 34°C	negative regulation of cell population proliferation	527	134	25.4269	80.21	6.9e-06	up	BAT
exposure to 34°C	leukocyte tethering or rolling	25	8	32	1.44	5.3e-05	down	ileum
exposure to 34°C	leukocyte tethering or rolling	22	10	45.4545	3.35	0.00072	up	BAT
exposure to 34°C	leukocyte tethering or rolling	27	13	48.1481	5.05	0.00048	up	SAT
exposure to 34°C	long-chain fatty acid metabolic process	47	7	14.8936	1.42	0.00378	down	QC
exposure to 34°C	long-chain fatty acid metabolic process	77	15	19.4805	2.7	0.00170	up	liver
exposure to 34°C	long-chain fatty acid metabolic process	61	12	19.6721	2.19	0.00133	up	ileum
exposure to 34°C	long-chain fatty acid metabolic process	51	19	37.2549	4.09	3.7e-08	down	BAT
exposure to 34°C	long-chain fatty acid metabolic process	51	20	39.2157	5.33	6.8e-08	down	SAT
exposure to 34°C	lymph node development	28	10	35.7143	1.62	2.0e-06	down	ileum
exposure to 34°C	lymph node development	23	9	39.1304	3.5	0.00463	up	BAT
exposure to 34°C	lymph node development	27	18	66.6667	5.05	6.2e-08	up	SAT
exposure to 34°C	response to wounding	374	88	23.5294	69.99	0.00432	up	SAT
exposure to 34°C	response to wounding	353	88	24.9292	53.72	0.00205	up	BAT
exposure to 34°C	intracellular signal transduction	1752	87	4.96575	61.52	0.00571	up	liver
exposure to 34°C	regulation of ion transmembrane transport	327	83	25.3823	61.19	0.00433	up	SAT
exposure to 34°C	negative regulation of B cell proliferation	18	6	33.3333	1.04	0.00037	down	ileum
exposure to 34°C	negative regulation of B cell proliferation	16	9	56.25	2.44	0.00018	up	BAT
exposure to 34°C	negative regulation of B cell proliferation	17	10	58.8235	3.18	0.00028	up	SAT
exposure to 34°C	negative regulation of endopeptidase activity	119	11	9.2437	4.18	0.00047	up	liver
exposure to 34°C	negative regulation of endopeptidase activity	121	18	14.876	3.17	6.6e-13	down	VAT
exposure to 34°C	negative regulation of endopeptidase activity	100	23	23	15.22	0.00031	up	BAT
exposure to 34°C	immune response	993	82	8.2578	39.05	0.00666	up	VAT
exposure to 34°C	immune response	993	373	37.5629	185.82	2.8e-07	up	SAT
exposure to 34°C	calcium-mediated signaling	160	54	33.75	29.94	0.00852	up	SAT
exposure to 34°C	negative regulation of peptidyl-tyrosine phosphorylation	52	9	17.3077	3	0.00684	down	ileum
exposure to 34°C	negative regulation of peptidyl-tyrosine phosphorylation	49	11	22.449	7.46	0.00240	up	BAT
exposure to 34°C	negative regulation of peptidyl-tyrosine phosphorylation	51	14	27.451	9.54	0.00273	up	SAT
exposure to 34°C	negative regulation of T cell mediated immunity	15	4	26.6667	0.87	0.00902	down	ileum
exposure to 34°C	negative regulation of T cell mediated immunity	15	4	26.6667	0.59	0.00228	up	VAT
exposure to 34°C	negative regulation of T cell mediated immunity	15	10	66.6667	2.81	6.2e-05	up	SAT
exposure to 34°C	neutrophil chemotaxis	59	7	11.8644	1.78	0.00368	down	QC
exposure to 34°C	neutrophil chemotaxis	56	7	12.5	1.97	0.00105	up	liver
exposure to 34°C	neutrophil chemotaxis	71	16	22.5352	4.1	0.00062	down	ileum
exposure to 34°C	neutrophil chemotaxis	71	26	36.6197	10.81	0.00331	up	BAT
exposure to 34°C	positive regulation of acute inflammatory response	18	5	27.7778	0.54	0.00015	down	QC
exposure to 34°C	positive regulation of acute inflammatory response	27	8	29.6296	1.56	9.9e-05	down	ileum
exposure to 34°C	positive regulation of acute inflammatory response	24	11	45.8333	4.49	0.00151	up	SAT
exposure to 34°C	positive regulation of acute inflammatory response	21	10	47.619	3.2	0.00046	up	BAT
exposure to 34°C	positive regulation of alpha-beta T cell proliferation	18	4	22.2222	0.71	0.00466	up	VAT
exposure to 34°C	positive regulation of alpha-beta T cell proliferation	18	5	27.7778	1.04	0.00289	down	ileum
exposure to 34°C	positive regulation of alpha-beta T cell proliferation	18	12	66.6667	3.37	1.1e-05	up	SAT
exposure to 34°C	innate immune response	440	108	24.5455	66.97	2.9e-07	up	BAT
exposure to 34°C	innate immune response	478	148	30.9623	89.45	1.1e-06	up	SAT
exposure to 34°C	positive regulation of interferon-gamma production	49	17	34.6939	7.46	0.00059	up	BAT
exposure to 34°C	positive regulation of interferon-gamma production	62	22	35.4839	3.58	1.6e-09	down	ileum
exposure to 34°C	positive regulation of interferon-gamma production	60	37	61.6667	11.23	2.1e-12	up	SAT
exposure to 34°C	positive regulation of interleukin-12 production	31	12	38.7097	1.79	6.4e-08	down	ileum
exposure to 34°C	positive regulation of interleukin-12 production	28	11	39.2857	4.26	0.00172	up	BAT
exposure to 34°C	positive regulation of interleukin-12 production	30	17	56.6667	5.61	4.0e-06	up	SAT
exposure to 34°C	positive regulation of neutrophil chemotaxis	22	6	27.2727	1.27	0.00122	down	ileum
exposure to 34°C	positive regulation of neutrophil chemotaxis	22	9	40.9091	3.35	0.00325	up	BAT
exposure to 34°C	positive regulation of neutrophil chemotaxis	23	10	43.4783	4.3	0.00546	up	SAT
exposure to 34°C	positive regulation of NF-kappaB transcription factor activity	119	17	14.2857	6.87	0.00047	down	ileum
exposure to 34°C	positive regulation of NF-kappaB transcription factor activity	112	29	25.8929	17.05	0.00226	up	BAT
exposure to 34°C	positive regulation of NF-kappaB transcription factor activity	119	42	35.2941	22.27	1.3e-05	up	SAT
exposure to 34°C	positive regulation of peptidyl-tyrosine phosphorylation	154	19	12.3377	6.06	0.00285	up	VAT
exposure to 34°C	positive regulation of peptidyl-tyrosine phosphorylation	156	27	17.3077	9.01	0.00180	down	ileum
exposure to 34°C	positive regulation of peptidyl-tyrosine phosphorylation	154	60	38.961	28.82	2.3e-05	up	SAT
exposure to 34°C	positive regulation of T cell differentiation in thymus	13	5	38.4615	0.75	0.00055	down	ileum
exposure to 34°C	positive regulation of T cell differentiation in thymus	13	9	69.2308	2.43	9.5e-05	up	SAT
exposure to 34°C	positive regulation of T cell differentiation in thymus	10	7	70	1.52	0.00015	up	BAT
exposure to 34°C	cellular response to organonitrogen compound	420	78	18.5714	78.59	0.00403	up	SAT
exposure to 34°C	regulation of B cell proliferation	59	8	13.5593	2.32	0.00056	up	VAT
exposure to 34°C	cell chemotaxis	230	77	33.4783	43.04	0.00227	up	SAT
exposure to 34°C	regulation of B cell proliferation	61	23	37.7049	3.52	4.8e-05	down	ileum
exposure to 34°C	regulation of B cell proliferation	59	37	62.7119	11.04	0.00022	up	SAT
exposure to 34°C	cell adhesion	1015	76	7.48768	39.92	0.00612	up	VAT
exposure to 34°C	neuron death	322	73	22.6708	49.01	0.00289	up	BAT
exposure to 34°C	chemokine-mediated signaling pathway	42	15	35.7143	6.39	0.00086	up	BAT
exposure to 34°C	cellular response to organonitrogen compound	406	62	15.2709	61.79	0.00341	up	BAT
exposure to 34°C	positive regulation of cell population proliferation	735	58	7.89116	28.91	0.00804	up	VAT
exposure to 34°C	DNA replication checkpoint	13	8	61.5385	2.43	0.00078	up	SAT
exposure to 34°C	DNA replication checkpoint	12	6	50	1.83	0.00498	up	BAT
exposure to 34°C	negative regulation of cell adhesion	223	52	23.3184	33.94	0.00032	up	BAT
exposure to 34°C	response to stimulus	6085	50	0.821693	40.77	0.00899	up	brain
exposure to 34°C	DNA replication initiation	26	11	42.3077	4.87	0.00465	up	SAT
exposure to 34°C	DNA replication initiation	25	11	44	3.8	0.00055	up	BAT
exposure to 34°C	cell adhesion	1035	40	3.86473	37.11	0.00743	up	ileum
exposure to 34°C	microtubule-based movement	206	39	18.932	38.55	0.00205	up	SAT
exposure to 34°C	axon guidance	159	38	23.8994	24.2	0.00817	up	BAT
exposure to 34°C	mitotic sister chromatid segregation	127	38	29.9213	19.33	0.00015	up	BAT
exposure to 34°C	double-strand break repair via break-induced replication	11	6	54.5455	2.06	0.00831	up	SAT
exposure to 34°C	microtubule-based movement	196	36	18.3673	29.83	0.00034	up	BAT
exposure to 34°C	regulation of regulatory T cell differentiation	22	9	40.9091	1.27	1.7e-06	down	ileum
exposure to 34°C	regulation of regulatory T cell differentiation	21	9	42.8571	3.2	0.00222	up	BAT
exposure to 34°C	regulation of ion transmembrane transport	327	28	8.56269	12.86	7.8e-05	up	VAT
exposure to 34°C	double-strand break repair via break-induced replication	11	6	54.5455	1.67	0.00285	up	BAT
exposure to 34°C	regulation of regulatory T cell differentiation	22	11	50	4.12	0.00088	up	SAT
exposure to 34°C	calcium-mediated signaling	160	25	15.625	6.29	0.00065	up	VAT
exposure to 34°C	epoxygenase P450 pathway	24	8	33.3333	0.84	9.7e-07	up	liver
exposure to 34°C	anterior/posterior pattern specification	165	18	10.9091	6.49	0.00015	up	VAT
exposure to 34°C	neuron death	325	17	5.23077	12.78	0.00110	up	VAT
exposure to 34°C	cell chemotaxis	230	17	7.3913	9.05	0.00545	up	VAT
exposure to 34°C	homophilic cell adhesion via plasma membrane adhesion molecules	73	26	35.6164	13.66	0.00047	up	SAT
exposure to 34°C	kinetochore organization	18	11	61.1111	3.37	0.00023	up	SAT
exposure to 34°C	mitotic spindle assembly	50	15	30	7.61	0.00031	up	BAT
exposure to 34°C	leukocyte proliferation	265	138	52.0755	49.59	0.00368	up	SAT
exposure to 34°C	leukocyte proliferation	233	73	31.3305	35.46	0.00024	up	BAT
exposure to 34°C	male meiotic nuclear division	27	12	44.4444	5.05	0.00271	up	SAT
exposure to 34°C	learning	131	11	8.39695	4.7	0.00265	up	ileum
exposure to 34°C	mitotic sister chromatid segregation	130	48	36.9231	24.33	0.00015	up	SAT
exposure to 34°C	mitotic spindle assembly	50	19	38	9.36	3.7e-05	up	SAT
exposure to 34°C	mitotic spindle assembly checkpoint	33	15	45.4545	6.18	0.00053	up	SAT
exposure to 34°C	response to lipopolysaccharide	209	16	7.6555	8.22	0.00051	up	VAT
exposure to 34°C	response to lipopolysaccharide	222	33	14.8649	12.82	0.00956	down	ileum
exposure to 34°C	response to lipopolysaccharide	195	50	25.641	29.68	0.00353	up	BAT
exposure to 34°C	mitotic spindle assembly checkpoint	31	11	35.4839	4.72	0.00443	up	BAT
exposure to 34°C	negative regulation of cell adhesion	239	80	33.4728	44.72	0.00942	up	SAT
exposure to 34°C	learning	104	9	8.65385	4.09	0.00099	up	VAT
exposure to 34°C	negative regulation of lymphocyte migration	11	6	54.5455	2.06	0.00831	up	SAT
exposure to 34°C	anterior/posterior pattern specification	165	8	4.84848	2.05	0.00537	up	QC
exposure to 34°C	positive regulation of calcium-mediated signaling	42	8	19.0476	1.65	0.00020	up	VAT
exposure to 34°C	neutrophil degranulation	11	6	54.5455	2.06	0.00831	up	SAT
exposure to 34°C	neutrophil degranulation	10	6	60	1.52	0.00149	up	BAT
exposure to 34°C	positive regulation of alcohol biosynthetic process	18	8	44.4444	2.74	0.00297	up	BAT
exposure to 34°C	positive regulation of calcium-mediated signaling	42	17	40.4762	7.86	0.00048	up	SAT
exposure to 34°C	positive regulation of cytokine secretion	125	46	36.8	23.39	0.00025	up	SAT
exposure to 34°C	positive regulation of cytokine secretion	109	38	34.8624	16.59	0.00043	up	BAT
exposure to 34°C	skeletal muscle cell differentiation	65	5	7.69231	0.81	0.00125	down	brain
exposure to 34°C	skeletal muscle cell differentiation	43	7	16.2791	1.51	0.00089	up	liver
exposure to 34°C	skeletal muscle cell differentiation	53	10	18.8679	3.06	0.00024	down	ileum
exposure to 34°C	skeletal muscle cell differentiation	61	12	19.6721	2.4	3.4e-05	up	VAT
exposure to 34°C	positive regulation of interleukin-5 production	11	7	63.6364	1.67	0.00035	up	BAT
exposure to 34°C	chemokine-mediated signaling pathway	41	6	14.6341	1.61	0.00501	up	VAT
exposure to 34°C	neuron fate commitment	32	6	18.75	1.26	0.00821	up	VAT
exposure to 34°C	thymic T cell selection	23	6	26.087	0.9	0.00445	up	VAT
exposure to 34°C	positive regulation of interleukin-5 production	11	6	54.5455	2.06	0.00831	up	SAT
exposure to 34°C	positive thymic T cell selection	13	9	69.2308	2.43	9.5e-05	up	SAT
exposure to 34°C	positive thymic T cell selection	13	4	30.7692	0.51	0.00127	up	VAT
exposure to 34°C	T cell activation involved in immune response	70	21	30	10.65	0.00017	up	BAT
exposure to 34°C	protein localization to kinetochore	14	8	57.1429	2.62	0.00152	up	SAT
exposure to 34°C	protein localization to kinetochore	12	6	50	1.83	0.00498	up	BAT
exposure to 34°C	T cell activation involved in immune response	78	37	47.4359	14.6	0.00149	up	SAT
exposure to 34°C	regulation of attachment of spindle microtubules to kinetochore	12	8	66.6667	2.25	0.00036	up	SAT
exposure to 34°C	regulation of attachment of spindle microtubules to kinetochore	12	7	58.3333	1.83	0.00073	up	BAT
exposure to 34°C	muscle contraction	220	46	20.9091	23	0.00015	down	SAT
exposure to 34°C	T cell receptor signaling pathway	98	10	10.2041	3.85	0.00280	up	VAT
exposure to 34°C	muscle contraction	257	15	5.83658	3.19	0.00020	down	Brain
exposure to 34°C	T cell receptor signaling pathway	100	21	21	5.77	4.4e-07	down	ileum
exposure to 34°C	glomerulus vasculature development	24	5	20.8333	0.94	0.00041	up	VAT
exposure to 34°C	T cell receptor signaling pathway	98	52	53.0612	18.34	9.2e-10	up	SAT
exposure to 34°C	kinetochore organization	17	5	29.4118	2.59	0.00235	up	BAT
exposure to 34°C	retinoic acid metabolic process	17	5	29.4118	0.61	0.00025	up	ileum
exposure to 34°C	homophilic cell adhesion via plasma membrane adhesion molecules	63	4	6.34921	0.78	0.00770	up	QC
exposure to 34°C	amine metabolic process	58	4	6.89655	2.04	0.00704	up	liver
exposure to 34°C	amine metabolic process	57	4	7.01754	2.24	0.00057	up	VAT
exposure to 34°C	neuron fate commitment	24	4	16.6667	0.84	0.00911	up	liver
exposure to 34°C	glomerulus vasculature development	22	4	18.1818	0.77	0.00307	up	liver
exposure to 34°C	middle ear morphogenesis	22	4	18.1818	0.87	0.00984	up	VAT
exposure to 34°C	middle ear morphogenesis	20	4	20	0.72	0.00500	up	ileum
exposure to 34°C	nitric oxide mediated signal transduction	20	4	20	0.72	0.00500	up	ileum
exposure to 34°C	regulation of cell fate commitment	18	4	22.2222	0.71	0.00291	up	VAT
exposure to 34°C	positive regulation of alcohol biosynthetic process	17	4	23.5294	0.6	0.00248	up	liver
exposure to 34°C	thymic T cell selection	23	16	69.5652	4.3	0.00647	up	SAT
exposure to 34°C	male meiotic nuclear division	19	3	15.7895	0.24	0.00514	up	QC
exposure to 34°C	nitric oxide mediated signal transduction	13	3	23.0769	0.46	0.00945	up	liver
exposure to 34°C	regulation of cell fate commitment	12	3	25	0.42	0.00746	up	liver
exposure to 34°C	retinoic acid metabolic process	12	3	25	0.15	0.00038	up	QC
exposure to 34°C	epoxygenase P450 pathway	11	3	27.2727	0.39	0.00609	up	ileum
exposure to 34°C	glomerulus morphogenesis	11	3	27.2727	0.43	0.00788	up	VAT
exposure to 34°C	negative regulation of lymphocyte migration	11	3	27.2727	0.43	0.00788	up	VAT
exposure to 34°C	glomerulus morphogenesis	10	3	30	0.35	0.00429	up	liver
exposure to 34°C	activated T cell proliferation	37	10	27.027	2.14	0.00846	down	ileum
exposure to 34°C	activated T cell proliferation	36	19	52.7778	6.74	0.00760	up	SAT
exposure to 34°C	acyl-CoA metabolic process	73	9	12.3288	2.56	0.00778	up	liver
exposure to 34°C	acyl-CoA metabolic process	64	33	51.5625	5.13	4.8e-05	down	BAT
exposure to 34°C	acyl-CoA metabolic process	67	39	58.209	7.01	5.8e-08	down	SAT
exposure to 34°C	immune response-regulating cell surface receptor signaling pathway	162	47	29.0123	9.35	0.00064	down	ileum
exposure to 34°C	adenylate cyclase-inhibiting G protein-coupled receptor signaling pathway	42	7	16.6667	2.43	0.00957	down	ileum
exposure to 34°C	adenylate cyclase-inhibiting G protein-coupled receptor signaling pathway	29	13	44.8276	5.43	0.00112	up	SAT
exposure to 34°C	antigen processing and presentation of exogenous peptide antigen via MHC class II	14	4	28.5714	0.81	0.00693	down	ileum
exposure to 34°C	antigen processing and presentation of exogenous peptide antigen via MHC class II	14	10	71.4286	2.62	2.5e-05	up	SAT
exposure to 34°C	antigen receptor-mediated signaling pathway	107	6	5.60748	3.76	0.00123	up	liver
exposure to 34°C	antigen receptor-mediated signaling pathway	134	42	31.3433	7.74	0.00305	down	ileum
exposure to 34°C	B cell homeostasis	36	11	30.5556	2.08	3.5e-06	down	ileum
exposure to 34°C	B cell homeostasis	36	19	52.7778	6.74	4.5e-06	up	SAT
exposure to 34°C	B cell proliferation	76	30	39.4737	4.39	7.5e-06	down	ileum
exposure to 34°C	B cell proliferation	77	47	61.039	14.41	0.00047	up	SAT
exposure to 34°C	brown fat cell differentiation	40	6	15	1.4	0.00221	up	liver
exposure to 34°C	brown fat cell differentiation	45	7	15.5556	1.36	0.00023	down	QC
exposure to 34°C	brown fat cell differentiation	47	12	25.5319	3.77	0.00067	down	BAT
exposure to 34°C	brown fat cell differentiation	47	17	36.1702	4.91	2.2e-08	down	SAT
exposure to 34°C	CD8-positive, alpha-beta T cell differentiation	12	6	50	0.69	2.5e-05	down	ileum
exposure to 34°C	CD8-positive, alpha-beta T cell differentiation	13	10	76.9231	2.43	8.5e-06	up	SAT
exposure to 34°C	cell fate specification	53	6	11.3208	1.6	0.00740	down	QC
exposure to 34°C	cell fate specification	52	8	15.3846	2.05	0.00659	up	VAT
exposure to 34°C	cell maturation	119	10	8.40336	3.59	0.00639	down	QC
exposure to 34°C	cell maturation	136	15	11.0294	7.85	0.00430	down	ileum
exposure to 34°C	cell maturation	128	38	29.6875	23.95	0.00018	up	SAT
exposure to 34°C	cell-cell signaling	1177	74	6.28717	46.29	0.00396	up	VAT
exposure to 34°C	cell-cell signaling	1302	87	6.68203	75.18	0.00733	down	ileum
exposure to 34°C	cellular response to lipopolysaccharide	158	24	15.1899	9.12	0.00063	down	ileum
exposure to 34°C	cellular response to lipopolysaccharide	149	48	32.2148	27.88	0.00135	up	SAT
exposure to 34°C	cholesterol homeostasis	77	9	11.6883	2.76	0.00168	up	ileum
exposure to 34°C	cholesterol homeostasis	67	9	13.4328	1.76	5.9e-05	down	VAT
exposure to 34°C	cholesterol homeostasis	67	15	22.3881	7.01	0.00332	down	SAT
exposure to 34°C	cortical actin cytoskeleton organization	37	7	18.9189	2.14	0.00468	down	ileum
exposure to 34°C	cortical actin cytoskeleton organization	37	14	37.8378	6.92	0.00500	up	SAT
exposure to 34°C	defense response to fungus	15	4	26.6667	0.87	0.00902	down	ileum
exposure to 34°C	defense response to fungus	14	7	50	2.13	0.00239	up	BAT
exposure to 34°C	defense response to protozoan	24	8	33.3333	1.92	0.00038	down	BAT
exposure to 34°C	defense response to protozoan	26	12	46.1538	1.5	5.8e-09	down	ileum
exposure to 34°C	defense response to protozoan	26	12	46.1538	4.87	0.00127	up	SAT
exposure to 34°C	drug catabolic process	89	18	20.2247	3.19	6.4e-05	up	ileum
exposure to 34°C	drug catabolic process	72	23	31.9444	7.53	0.00016	down	SAT
exposure to 34°C	eosinophil migration	13	3	23.0769	0.16	0.00049	down	brain
exposure to 34°C	eosinophil migration	17	11	64.7059	2.59	0.00349	up	BAT
exposure to 34°C	regulation of MAPK cascade	576	38	6.59722	22.65	0.00326	up	VAT
exposure to 34°C	morphogenesis of a branching structure	188	13	6.91489	7.39	0.00444	up	VAT
exposure to 34°C	gamma-delta T cell differentiation	13	6	46.1538	0.75	4.4e-05	down	ileum
exposure to 34°C	gamma-delta T cell differentiation	13	9	69.2308	2.43	9.5e-05	up	SAT
exposure to 34°C	regulation of chemotaxis	178	13	7.30337	7	0.00864	up	VAT
exposure to 34°C	ureteric bud morphogenesis	53	4	7.54717	2.08	0.00111	up	VAT
exposure to 34°C	angiogenesis	433	37	8.54503	17.03	0.00037	up	VAT
exposure to 34°C	hydrogen peroxide catabolic process	19	3	15.7895	0.13	0.00026	up	brain
exposure to 34°C	hydrogen peroxide catabolic process	16	6	37.5	1.67	0.00410	down	SAT
exposure to 34°C	negative regulation of cytokine production involved in immune response	19	7	36.8421	1.1	5.7e-05	down	ileum
exposure to 34°C	negative regulation of immune response	128	23	17.9688	7.39	0.00556	down	ileum
exposure to 34°C	positive regulation of humoral immune response	11	6	54.5455	0.64	1.3e-05	down	ileum
exposure to 34°C	positive regulation of immunoglobulin mediated immune response	33	10	30.303	1.91	0.00054	down	ileum
exposure to 34°C	positive regulation of T-helper 1 type immune response	20	6	30	1.15	0.00070	down	ileum
exposure to 34°C	regulation of T-helper 17 type immune response	17	5	29.4118	0.98	0.00175	down	ileum
exposure to 34°C	immunoglobulin secretion	21	8	38.0952	3.2	0.00618	up	BAT
exposure to 34°C	immunoglobulin secretion	23	9	39.1304	1.33	0.00330	down	ileum
exposure to 34°C	inflammatory cell apoptotic process	19	7	36.8421	1.1	5.7e-05	down	ileum
exposure to 34°C	inflammatory cell apoptotic process	18	9	50	3.37	0.00262	up	SAT
exposure to 34°C	integrin-mediated signaling pathway	81	11	13.5802	4.68	0.00665	down	ileum
exposure to 34°C	integrin-mediated signaling pathway	82	29	35.3659	15.34	2.0e-05	up	SAT
exposure to 34°C	interferon-gamma production	98	29	29.5918	5.66	0.00162	down	ileum
exposure to 34°C	interferon-gamma production	97	56	57.732	18.15	0.00108	up	SAT
exposure to 34°C	cardiocyte differentiation	153	14	9.15033	6.02	0.00857	up	VAT
exposure to 34°C	regulation of T cell differentiation	127	12	9.44882	4.99	0.00575	up	VAT
exposure to 34°C	regulation of epidermal cell differentiation	38	4	10.5263	1.49	0.00788	up	VAT
exposure to 34°C	Notch signaling pathway	142	15	10.5634	5.58	0.00795	up	VAT
exposure to 34°C	leukocyte chemotaxis	167	34	20.3593	9.64	7.9e-07	down	ileum
exposure to 34°C	leukocyte chemotaxis	167	59	35.3293	31.25	0.00737	up	SAT
exposure to 34°C	leukocyte migration involved in inflammatory response	14	4	28.5714	0.42	0.00064	down	QC
exposure to 34°C	leukocyte migration involved in inflammatory response	17	8	47.0588	2.59	0.00190	up	BAT
exposure to 34°C	lipoprotein transport	13	3	23.0769	0.34	0.00420	down	VAT
exposure to 34°C	lipoprotein transport	14	4	28.5714	0.5	0.00123	up	ileum
exposure to 34°C	inner ear morphogenesis	77	9	11.6883	3.03	0.00625	up	VAT
exposure to 34°C	mast cell degranulation	36	8	22.2222	2.08	0.00371	down	ileum
exposure to 34°C	mast cell degranulation	37	16	43.2432	6.92	0.00444	up	SAT
exposure to 34°C	mature B cell differentiation	27	8	29.6296	1.56	0.00033	down	ileum
exposure to 34°C	mature B cell differentiation	25	16	64	4.68	0.00025	up	SAT
exposure to 34°C	microglial cell activation	34	5	14.7059	1.03	0.00454	down	QC
exposure to 34°C	microglial cell activation	37	9	24.3243	2.14	0.00246	down	ileum
exposure to 34°C	microglial cell activation	35	14	40	5.33	0.00055	up	BAT
exposure to 34°C	lymphocyte migration	76	9	11.8421	2.99	0.00444	up	VAT
exposure to 34°C	metanephros development	64	8	12.5	2.52	0.00494	up	VAT
exposure to 34°C	synapse assembly	117	15	12.8205	4.6	0.00199	up	VAT
exposure to 34°C	thymus development	46	6	13.0435	1.81	0.00885	up	VAT
exposure to 34°C	T-helper cell differentiation	53	7	13.2075	2.08	0.00868	up	VAT
exposure to 34°C	heart valve development	52	7	13.4615	2.05	0.00109	up	VAT
exposure to 34°C	striated muscle contraction	125	28	22.4	13.07	0.00409	down	SAT
exposure to 34°C	myeloid dendritic cell activation	25	9	36	1.44	0.00171	down	ileum
exposure to 34°C	myeloid dendritic cell activation	27	13	48.1481	5.05	0.00128	up	SAT
exposure to 34°C	myeloid leukocyte differentiation	182	25	13.7363	10.51	0.00538	down	ileum
exposure to 34°C	myeloid leukocyte differentiation	185	59	31.8919	34.62	0.00742	up	SAT
exposure to 34°C	natural killer cell differentiation	29	7	24.1379	1.67	0.00513	down	ileum
exposure to 34°C	natural killer cell differentiation	27	13	48.1481	5.05	0.00258	up	SAT
exposure to 34°C	negative regulation of antigen receptor-mediated signaling pathway	24	6	25	1.39	0.00033	down	ileum
exposure to 34°C	negative regulation of antigen receptor-mediated signaling pathway	24	15	62.5	4.49	0.00338	up	SAT
exposure to 34°C	neuron maturation	43	6	13.9535	1.69	0.00371	up	VAT
exposure to 34°C	cellular response to calcium ion	57	8	14.0351	2.24	0.00164	up	VAT
exposure to 34°C	SMAD protein signal transduction	57	8	14.0351	2.24	0.00383	up	VAT
exposure to 34°C	anterior/posterior axis specification	33	5	15.1515	1.3	0.00880	up	VAT
exposure to 34°C	negative regulation of cytokine biosynthetic process	23	4	17.3913	0.67	0.0041	down	liver
exposure to 34°C	negative regulation of cytokine biosynthetic process	23	6	26.087	1.33	0.00157	down	ileum
exposure to 34°C	negative regulation of cytokine biosynthetic process	25	13	52	4.68	0.00018	up	SAT
exposure to 34°C	outflow tract morphogenesis	71	11	15.493	2.79	0.00037	up	VAT
exposure to 34°C	neuronal action potential	22	4	18.1818	0.87	0.00984	up	VAT
exposure to 34°C	regulation of dopamine secretion	22	4	18.1818	0.87	0.00984	up	VAT
exposure to 34°C	negative regulation of inflammatory response	120	17	14.1667	6.93	0.00330	down	ileum
exposure to 34°C	negative regulation of inflammatory response	117	36	30.7692	21.89	0.00211	up	SAT
exposure to 34°C	negative regulation of interleukin-10 production	14	7	50	0.81	5.0e-06	down	ileum
exposure to 34°C	negative regulation of interleukin-10 production	15	8	53.3333	2.81	0.00272	up	SAT
exposure to 34°C	negative regulation of interleukin-12 production	18	6	33.3333	1.04	0.00037	down	ileum
exposure to 34°C	negative regulation of interleukin-12 production	18	10	55.5556	3.37	0.00052	up	SAT
exposure to 34°C	negative regulation of interleukin-17 production	13	5	38.4615	0.75	0.00055	down	ileum
exposure to 34°C	negative regulation of interleukin-17 production	13	7	53.8462	2.43	0.00474	up	SAT
exposure to 34°C	negative regulation of interleukin-6 production	42	16	38.0952	2.43	4.0e-08	down	ileum
exposure to 34°C	negative regulation of interleukin-6 production	42	22	52.381	7.86	3.9e-06	up	SAT
exposure to 34°C	negative regulation of leukocyte apoptotic process	47	10	21.2766	2.71	0.00159	down	ileum
exposure to 34°C	negative regulation of leukocyte apoptotic process	45	15	33.3333	6.85	0.00597	up	BAT
exposure to 34°C	positive regulation of myotube differentiation	31	6	19.3548	1.22	0.00292	up	VAT
exposure to 34°C	regulation of calcium ion-dependent exocytosis	31	6	19.3548	1.22	0.00566	up	VAT
exposure to 34°C	artery morphogenesis	63	13	20.6349	2.48	0.00943	up	VAT
exposure to 34°C	pericardium development	24	5	20.8333	0.94	0.00211	up	VAT
exposure to 34°C	negative regulation of T cell proliferation	55	12	21.8182	3.18	0.00016	down	ileum
exposure to 34°C	negative regulation of T cell proliferation	57	31	54.386	10.67	6.1e-09	up	SAT
exposure to 34°C	negative regulation of toll-like receptor signaling pathway	31	6	19.3548	1.79	0.00773	down	ileum
exposure to 34°C	negative regulation of toll-like receptor signaling pathway	30	13	43.3333	5.61	0.00165	up	SAT
exposure to 34°C	positive regulation of skeletal muscle tissue development	23	5	21.7391	0.9	0.00172	up	VAT
exposure to 34°C	negative regulation of calcium-mediated signaling	27	6	22.2222	1.06	0.00062	up	VAT
exposure to 34°C	response to ATP	27	6	22.2222	1.06	0.00020	up	VAT
exposure to 34°C	negative regulation of tumor necrosis factor production	49	4	8.16327	0.61	0.00314	down	brain
exposure to 34°C	negative regulation of tumor necrosis factor production	46	6	13.0435	1.39	0.00244	down	QC
exposure to 34°C	negative regulation of tumor necrosis factor production	51	14	27.451	2.94	7.1e-07	down	ileum
exposure to 34°C	negative regulation of tumor necrosis factor production	51	21	41.1765	9.54	0.00016	up	SAT
exposure to 34°C	negative thymic T cell selection	12	6	50	0.69	2.5e-05	down	ileum
exposure to 34°C	negative thymic T cell selection	12	9	75	2.25	3.5e-05	up	SAT
exposure to 34°C	vascular smooth muscle cell development	11	3	27.2727	0.43	0.00788	up	VAT
exposure to 34°C	aorta morphogenesis	29	8	27.5862	1.14	1.1e-05	up	VAT
exposure to 34°C	positive regulation of neurotransmitter secretion	18	5	27.7778	0.71	0.00052	up	VAT
exposure to 34°C	NK T cell differentiation	10	3	30	0.39	0.00590	up	VAT
exposure to 34°C	pharyngeal system development	22	7	31.8182	0.87	1.4e-05	up	VAT
exposure to 34°C	regulation of blood vessel endothelial cell proliferation involved in sprouting angiogenesis	10	4	40	0.39	0.00041	up	VAT
exposure to 34°C	regulation of secondary heart field cardioblast proliferation	10	4	40	0.39	0.00041	up	VAT
exposure to 34°C	T-helper 2 cell cytokine production	10	4	40	0.39	0.00041	up	VAT
exposure to 34°C	organic hydroxy compound transport	141	16	11.3475	4.25	0.00144	down	QC
exposure to 34°C	organic hydroxy compound transport	137	32	23.3577	20.85	0.00604	up	BAT
exposure to 34°C	otic vesicle development	10	3	30	0.3	0.00279	down	QC
exposure to 34°C	otic vesicle development	10	3	30	0.39	0.00590	up	VAT
exposure to 34°C	oxidation-reduction process	668	40	5.98802	17.51	1.3e-05	down	VAT
exposure to 34°C	oxidation-reduction process	697	43	6.1693	24.99	0.00028	up	ileum
exposure to 34°C	oxidation-reduction process	661	107	16.1876	52.99	0.00013	down	BAT
exposure to 34°C	oxidation-reduction process	668	272	40.7186	69.84	1.4e-30	down	SAT
exposure to 34°C	regulation of immune response	539	45	8.34879	21.2	0.00016	up	VAT
exposure to 34°C	natural killer cell activation involved in immune response	10	7	70	1.87	0.00056	up	SAT
exposure to 34°C	cellular response to transforming growth factor beta stimulus	178	29	16.2921	33.31	0.00767	up	SAT
exposure to 34°C	phagocytosis, engulfment	45	10	22.2222	2.6	0.00450	down	ileum
exposure to 34°C	phagocytosis, engulfment	41	14	34.1463	6.24	0.00235	up	BAT
exposure to 34°C	platelet aggregation	35	8	22.8571	2.02	0.00026	down	ileum
exposure to 34°C	platelet aggregation	37	19	51.3514	6.92	0.00016	up	SAT
exposure to 34°C	positive regulation of activated T cell proliferation	20	6	30	1.15	0.00070	down	ileum
exposure to 34°C	positive regulation of activated T cell proliferation	20	11	55	3.74	0.00030	up	SAT
exposure to 34°C	establishment of protein localization	1607	280	17.4238	300.72	0.00722	up	SAT
exposure to 34°C	regulation of humoral immune response mediated by circulating immunoglobulin	10	7	70	1.87	0.00056	up	SAT
exposure to 34°C	positive regulation of B cell proliferation	38	13	34.2105	2.19	1.0e-07	down	ileum
exposure to 34°C	positive regulation of B cell proliferation	37	22	59.4595	6.92	4.5e-08	up	SAT
exposure to 34°C	positive regulation of type 2 immune response	13	9	69.2308	2.43	9.5e-05	up	SAT
exposure to 34°C	cellular response to drug	276	59	21.3768	51.65	0.00343	up	SAT
exposure to 34°C	positive regulation of cAMP-mediated signaling	27	3	11.1111	0.33	0.00441	down	brain
exposure to 34°C	positive regulation of cAMP-mediated signaling	15	4	26.6667	0.54	0.00162	up	ileum
exposure to 34°C	positive regulation of CD4-positive, alpha-beta T cell differentiation	25	9	36	1.44	2.4e-07	down	ileum
exposure to 34°C	positive regulation of CD4-positive, alpha-beta T cell differentiation	25	15	60	4.68	0.00025	up	SAT
exposure to 34°C	positive regulation of cysteine-type endopeptidase activity	112	24	21.4286	20.96	0.00654	up	SAT
exposure to 34°C	positive regulation of neuron differentiation	357	79	22.1289	66.81	0.00728	up	SAT
exposure to 34°C	ventral spinal cord development	27	6	22.2222	5.05	0.00777	up	SAT
exposure to 34°C	cell-matrix adhesion	176	40	22.7273	32.93	0.00916	up	SAT
exposure to 34°C	positive regulation of cytosolic calcium ion concentration involved in phospholipase C-activating G protein-coupled signaling pathway	27	6	22.2222	1.56	0.00378	down	ileum
exposure to 34°C	positive regulation of cytosolic calcium ion concentration involved in phospholipase C-activating G protein-coupled signaling pathway	23	12	52.1739	4.3	0.00031	up	SAT
exposure to 34°C	positive regulation of GTPase activity	191	21	10.9948	11.03	0.00031	down	ileum
exposure to 34°C	positive regulation of GTPase activity	190	51	26.8421	35.55	0.00314	up	SAT
exposure to 34°C	immune response-regulating cell surface receptor signaling pathway	147	49	33.3333	22.37	0.00051	up	BAT
exposure to 34°C	negative regulation of cytokine production involved in immune response	19	4	21.0526	0.75	0.00572	up	VAT
exposure to 34°C	positive regulation of inflammatory response to antigenic stimulus	14	6	42.8571	0.81	7.3e-05	down	ileum
exposure to 34°C	positive regulation of inflammatory response to antigenic stimulus	15	7	46.6667	2.81	0.00519	up	SAT
exposure to 34°C	positive regulation of interleukin-10 production	26	3	11.5385	0.32	0.00395	down	brain
exposure to 34°C	positive regulation of interleukin-10 production	29	10	34.4828	1.67	2.8e-06	down	ileum
exposure to 34°C	positive regulation of interleukin-10 production	29	14	48.2759	5.43	0.00028	up	SAT
exposure to 34°C	positive regulation of interleukin-17 production	12	6	50	0.69	2.5e-05	down	ileum
exposure to 34°C	positive regulation of interleukin-17 production	11	8	72.7273	2.06	0.00014	up	SAT
exposure to 34°C	positive regulation of interleukin-2 biosynthetic process	11	4	36.3636	0.64	0.00262	down	ileum
exposure to 34°C	positive regulation of interleukin-2 biosynthetic process	12	7	58.3333	2.25	0.00261	up	SAT
exposure to 34°C	positive regulation of interleukin-4 production	21	6	28.5714	1.21	0.00093	down	ileum
exposure to 34°C	positive regulation of interleukin-4 production	22	15	68.1818	4.12	5.2e-07	up	SAT
exposure to 34°C	positive regulation of immune response to tumor cell	12	8	66.6667	2.25	0.00036	up	SAT
exposure to 34°C	mesenchymal cell development	68	16	23.5294	12.72	0.00520	up	SAT
exposure to 34°C	positive regulation of interleukin-6 biosynthetic process	15	4	26.6667	0.87	0.00902	down	ileum
exposure to 34°C	positive regulation of interleukin-6 biosynthetic process	14	7	50	2.62	0.00796	up	SAT
exposure to 34°C	positive regulation of interleukin-6 production	75	13	17.3333	4.33	0.00329	down	ileum
exposure to 34°C	positive regulation of interleukin-6 production	71	21	29.5775	10.81	0.00403	up	BAT
exposure to 34°C	positive regulation of interleukin-8 production	41	9	21.9512	2.37	0.00645	down	ileum
exposure to 34°C	positive regulation of interleukin-8 production	38	13	34.2105	5.78	0.00292	up	BAT
exposure to 34°C	positive regulation of leukocyte apoptotic process	31	8	25.8065	1.79	0.00022	down	ileum
exposure to 34°C	positive regulation of leukocyte apoptotic process	29	15	51.7241	5.43	0.00443	up	SAT
exposure to 34°C	positive regulation of lipid catabolic process	21	3	14.2857	0.26	0.00774	down	brain
exposure to 34°C	positive regulation of lipid catabolic process	23	5	21.7391	0.82	0.00114	up	ileum
exposure to 34°C	positive regulation of lipid catabolic process	20	6	30	0.52	8.8e-06	down	VAT
exposure to 34°C	positive regulation of lipid catabolic process	20	6	30	1.6	0.00380	down	BAT
exposure to 34°C	positive regulation of lipid catabolic process	20	9	45	2.09	8.4e-05	down	SAT
exposure to 34°C	positive regulation of mast cell activation	17	3	17.6471	0.51	0.00521	down	QC
exposure to 34°C	positive regulation of mast cell activation	23	10	43.4783	4.3	0.00341	up	SAT
exposure to 34°C	positive regulation of myeloid leukocyte differentiation	52	11	21.1538	3	0.00882	down	ileum
exposure to 34°C	positive regulation of myeloid leukocyte differentiation	54	18	33.3333	10.11	0.00452	up	SAT
exposure to 34°C	positive regulation of natural killer cell mediated cytotoxicity	25	8	32	1.44	5.3e-05	down	ileum
exposure to 34°C	positive regulation of natural killer cell mediated cytotoxicity	24	13	54.1667	4.49	0.00011	up	SAT
exposure to 34°C	positive regulation of Rho protein signal transduction	25	3	12	0.31	0.00353	down	brain
exposure to 34°C	positive regulation of Rho protein signal transduction	25	15	60	4.68	5.6e-06	up	SAT
exposure to 34°C	positive regulation of synapse assembly	42	6	14.2857	1.65	0.00565	up	VAT
exposure to 34°C	positive regulation of synapse assembly	44	9	20.4545	3.53	0.00724	down	BAT
exposure to 34°C	positive regulation of T cell differentiation	81	24	29.6296	4.68	0.00015	down	ileum
exposure to 34°C	positive regulation of T cell differentiation	82	44	53.6585	15.34	0.00040	up	SAT
exposure to 34°C	negative regulation of immune response	131	45	34.3511	24.51	0.00230	up	SAT
exposure to 34°C	positive regulation of humoral immune response	11	8	72.7273	2.06	0.00014	up	SAT
exposure to 34°C	positive regulation of toll-like receptor signaling pathway	24	6	25	1.39	0.00688	down	ileum
exposure to 34°C	positive regulation of toll-like receptor signaling pathway	24	10	41.6667	4.49	0.00794	up	SAT
exposure to 34°C	positive regulation of transcription by RNA polymerase II	1000	23	2.3	12.4	0.00406	down	brain
exposure to 34°C	positive regulation of transcription by RNA polymerase II	926	228	24.622	173.28	1.2e-06	up	SAT
exposure to 34°C	positive regulation of triglyceride metabolic process	23	6	26.087	0.82	5.2e-05	up	ileum
exposure to 34°C	positive regulation of triglyceride metabolic process	20	12	60	2.09	0.00012	down	SAT
exposure to 34°C	positive regulation of tumor necrosis factor biosynthetic process	19	2	10.5263	0.13	0.00705	up	brain
exposure to 34°C	positive regulation of tumor necrosis factor biosynthetic process	19	5	26.3158	1.1	0.00374	down	ileum
exposure to 34°C	transmembrane receptor protein tyrosine kinase signaling pathway	458	108	23.5808	85.71	0.00015	up	SAT
exposure to 34°C	potassium ion import across plasma membrane	28	4	14.2857	0.84	0.00939	down	QC
exposure to 34°C	potassium ion import across plasma membrane	32	7	21.875	1.26	0.00020	up	VAT
exposure to 34°C	protein kinase B signaling	145	7	4.82759	4.37	0.00723	down	QC
exposure to 34°C	protein kinase B signaling	133	10	7.5188	4.67	0.00126	up	liver
exposure to 34°C	gland morphogenesis	114	27	23.6842	21.33	0.00652	up	SAT
exposure to 34°C	stem cell differentiation	160	38	23.75	29.94	0.00978	up	SAT
exposure to 34°C	cell morphogenesis	854	205	24.0047	159.81	0.00757	up	SAT
exposure to 34°C	regulation of actin cytoskeleton organization	299	72	24.0803	55.95	0.00853	up	SAT
exposure to 34°C	regulation of B cell differentiation	31	12	38.7097	1.79	7.0e-05	down	ileum
exposure to 34°C	regulation of B cell differentiation	30	15	50	5.61	0.00150	up	SAT
exposure to 34°C	cellular response to carbohydrate stimulus	112	27	24.1071	20.96	0.00341	up	SAT
exposure to 34°C	peptidyl-serine phosphorylation	249	62	24.8996	46.6	0.00976	up	SAT
exposure to 34°C	cell surface receptor signaling pathway	1829	472	25.8065	342.26	8.4e-05	up	SAT
exposure to 34°C	cell division	495	131	26.4646	92.63	0.00526	up	SAT
exposure to 34°C	regulation of release of sequestered calcium ion into cytosol	64	18	28.125	11.98	0.00151	up	SAT
exposure to 34°C	microtubule bundle formation	58	17	29.3103	10.85	0.00277	up	SAT
exposure to 34°C	positive regulation of MAP kinase activity	182	54	29.6703	34.06	0.00659	up	SAT
exposure to 34°C	positive regulation of NIK/NF-kappaB signaling	64	19	29.6875	11.98	0.00918	up	SAT
exposure to 34°C	cellular response to virus	39	12	30.7692	7.3	0.00634	up	SAT
exposure to 34°C	regulation of cell shape	132	15	11.3636	7.62	0.00913	down	ileum
exposure to 34°C	positive regulation of I-kappaB kinase/NF-kappaB signaling	103	32	31.068	19.27	0.00170	up	SAT
exposure to 34°C	regulation of cell shape	128	32	25	19.48	0.00254	up	BAT
exposure to 34°C	calcium ion transport	294	95	32.3129	55.02	0.00045	up	SAT
exposure to 34°C	positive regulation of mitotic nuclear division	46	15	32.6087	8.61	0.00453	up	SAT
exposure to 34°C	positive regulation of immunoglobulin mediated immune response	34	15	44.1176	6.36	0.00150	up	SAT
exposure to 34°C	regulation of defense response to virus	63	7	11.1111	3.64	0.00064	down	ileum
exposure to 34°C	regulation of Ras protein signal transduction	205	67	32.6829	38.36	0.00245	up	SAT
exposure to 34°C	regulation of defense response to virus	62	21	33.871	11.6	0.00083	up	SAT
exposure to 34°C	regulation of immunoglobulin secretion	17	6	35.2941	0.98	0.00026	down	ileum
exposure to 34°C	regulation of immunoglobulin secretion	17	10	58.8235	3.18	0.00028	up	SAT
exposure to 34°C	regulation of calcium ion transmembrane transport	122	40	32.7869	22.83	0.00753	up	SAT
exposure to 34°C	oligodendrocyte differentiation	72	24	33.3333	13.47	0.00784	up	SAT
exposure to 34°C	regulation of interferon-gamma secretion	12	5	41.6667	0.69	0.00036	down	ileum
exposure to 34°C	kidney morphogenesis	74	25	33.7838	13.85	0.00441	up	SAT
exposure to 34°C	negative regulation of protein secretion	121	41	33.8843	22.64	0.00182	up	SAT
exposure to 34°C	chromosome organization involved in meiotic cell cycle	38	13	34.2105	7.11	0.00089	up	SAT
exposure to 34°C	negative regulation of epithelial cell differentiation	35	12	34.2857	6.55	0.00781	up	SAT
exposure to 34°C	regulation of cytokine production	563	194	34.4583	105.35	0.00286	up	SAT
exposure to 34°C	mature B cell differentiation involved in immune response	18	10	55.5556	3.37	0.00052	up	SAT
exposure to 34°C	mitotic DNA integrity checkpoint	56	20	35.7143	10.48	0.00764	up	SAT
exposure to 34°C	regulation of cell adhesion	588	211	35.8844	110.03	0.00189	up	SAT
exposure to 34°C	regulation of Rho protein signal transduction	119	43	36.1345	22.27	0.00087	up	SAT
exposure to 34°C	regulation of interferon-gamma secretion	12	7	58.3333	2.25	0.00261	up	SAT
exposure to 34°C	regulation of interleukin-2 biosynthetic process	13	3	23.0769	0.39	0.00621	down	QC
exposure to 34°C	positive regulation of JNK cascade	120	44	36.6667	22.46	0.00354	up	SAT
exposure to 34°C	negative regulation of CD4-positive, alpha-beta T cell differentiation	19	7	36.8421	3.56	0.00654	up	SAT
exposure to 34°C	microtubule depolymerization	43	16	37.2093	8.05	0.00470	up	SAT
exposure to 34°C	positive regulation of leukocyte migration	123	46	37.3984	23.02	0.00259	up	SAT
exposure to 34°C	negative regulation of animal organ morphogenesis	32	12	37.5	5.99	0.00985	up	SAT
exposure to 34°C	positive regulation of JUN kinase activity	69	26	37.6812	12.91	0.00118	up	SAT
exposure to 34°C	filopodium assembly	50	19	38	9.36	0.00035	up	SAT
exposure to 34°C	homeostasis of number of cells within a tissue	36	14	38.8889	6.74	0.00374	up	SAT
exposure to 34°C	regulation of interleukin-2 biosynthetic process	16	6	37.5	2.44	0.00235	up	BAT
exposure to 34°C	cell differentiation involved in embryonic placenta development	25	10	40	4.68	0.00829	up	SAT
exposure to 34°C	lymphoid progenitor cell differentiation	20	8	40	3.74	0.00772	up	SAT
exposure to 34°C	positive regulation of cell cycle arrest	30	12	40	5.61	0.00544	up	SAT
exposure to 34°C	phosphatidylinositol 3-kinase signaling	107	43	40.1869	20.02	0.00438	up	SAT
exposure to 34°C	meiotic chromosome segregation	57	23	40.3509	10.67	4.6e-05	up	SAT
exposure to 34°C	positive regulation of adaptive immune response based on somatic recombination of immune receptors built from immunoglobulin superfamily domains	95	48	50.5263	17.78	0.00019	up	SAT
exposure to 34°C	motor neuron axon guidance	27	11	40.7407	5.05	0.00653	up	SAT
exposure to 34°C	positive regulation of cytokine production involved in immune response	49	22	44.898	9.17	0.00076	up	SAT
exposure to 34°C	regulation of bone resorption	38	16	42.1053	7.11	0.00787	up	SAT
exposure to 34°C	bone trabecula morphogenesis	14	6	42.8571	2.62	0.00122	up	SAT
exposure to 34°C	heterophilic cell-cell adhesion via plasma membrane cell adhesion molecules	35	15	42.8571	6.55	0.00085	up	SAT
exposure to 34°C	T-helper 2 cell differentiation	14	6	42.8571	2.62	0.00654	up	SAT
exposure to 34°C	cell surface receptor signaling pathway involved in heart development	23	10	43.4783	4.3	0.00546	up	SAT
exposure to 34°C	negative regulation of T cell differentiation	39	17	43.5897	7.3	0.00155	up	SAT
exposure to 34°C	regulation of lipoprotein lipase activity	14	3	21.4286	0.41	0.0071	down	liver
exposure to 34°C	regulation of lipoprotein lipase activity	12	3	25	0.43	0.00791	up	ileum
exposure to 34°C	positive regulation of cytokinesis	25	11	44	4.68	0.00322	up	SAT
exposure to 34°C	regulation of lipoprotein lipase activity	11	3	27.2727	0.29	0.00252	down	VAT
exposure to 34°C	immunoglobulin mediated immune response	95	39	41.0526	17.78	0.00034	up	SAT
exposure to 34°C	positive regulation of cell adhesion mediated by integrin	20	9	45	3.74	0.00633	up	SAT
exposure to 34°C	positive regulation of defense response to virus by host	22	10	45.4545	4.12	0.00370	up	SAT
exposure to 34°C	regulation of lipoprotein lipase activity	11	4	36.3636	0.88	0.00857	down	BAT
exposure to 34°C	regulation of lipoprotein lipase activity	11	6	54.5455	1.15	0.00038	down	SAT
exposure to 34°C	positive regulation of T cell mediated cytotoxicity	22	10	45.4545	4.12	0.00370	up	SAT
exposure to 34°C	negative regulation of interleukin-2 production	24	11	45.8333	4.49	0.00216	up	SAT
exposure to 34°C	positive regulation of excitatory postsynaptic potential	24	11	45.8333	4.49	0.00216	up	SAT
exposure to 34°C	replication fork processing	26	12	46.1538	4.87	0.00127	up	SAT
exposure to 34°C	regulation of postsynaptic membrane organization	17	8	47.0588	3.18	0.00721	up	SAT
exposure to 34°C	type B pancreatic cell development	17	8	47.0588	3.18	0.00721	up	SAT
exposure to 34°C	negative regulation of interferon-gamma production	25	12	48	4.68	0.00082	up	SAT
exposure to 34°C	positive regulation of smooth muscle contraction	23	4	17.3913	0.69	0.00457	down	Quadriceps
exposure to 34°C	T cell proliferation	175	87	49.7143	32.75	0.00669	up	SAT
exposure to 34°C	glycosphingolipid biosynthetic process	14	7	50	2.62	0.00796	up	SAT
exposure to 34°C	neutrophil activation	26	13	50	4.87	0.00445	up	SAT
exposure to 34°C	peptidyl-tyrosine autophosphorylation	38	19	50	7.11	1.3e-05	up	SAT
exposure to 34°C	positive regulation of immunoglobulin production	36	18	50	6.74	1.6e-05	up	SAT
exposure to 34°C	positive regulation of T-helper cell differentiation	18	9	50	3.37	0.00262	up	SAT
exposure to 34°C	negative regulation of muscle contraction	29	3	10.3448	0.36	0.00639	down	Brain
exposure to 34°C	regulation of thymocyte apoptotic process	16	8	50	2.99	0.00456	up	SAT
exposure to 10°C	cardiac muscle contraction	113	6	5.30973	1.4	0.00027	down	brain
exposure to 34°C	regulation of T cell tolerance induction	11	4	36.3636	0.64	0.00262	down	ileum
exposure to 34°C	V(D)J recombination	14	7	50	2.62	0.00796	up	SAT
exposure to 34°C	regulation of T cell tolerance induction	10	7	70	1.87	0.00056	up	SAT
exposure to 34°C	positive regulation of T-helper 1 type immune response	20	10	50	3.74	0.00152	up	SAT
exposure to 34°C	immunoglobulin production involved in immunoglobulin mediated immune response	54	22	40.7407	10.11	0.00441	up	SAT
exposure to 34°C	regulation of tolerance induction	17	7	41.1765	0.98	0.00332	down	ileum
exposure to 34°C	labyrinthine layer morphogenesis	21	11	52.381	3.93	0.00826	up	SAT
exposure to 34°C	Sertoli cell development	19	10	52.6316	3.56	0.00091	up	SAT
exposure to 34°C	positive regulation of T cell cytokine production	17	9	52.9412	3.18	0.00157	up	SAT
exposure to 34°C	regulation of tolerance induction	14	8	57.1429	2.13	0.00036	up	BAT
exposure to 34°C	regulation of T-helper 17 type immune response	17	9	52.9412	3.18	0.00518	up	SAT
exposure to 34°C	central nervous system myelination	15	8	53.3333	2.81	0.00272	up	SAT
exposure to 34°C	mitotic chromosome condensation	15	8	53.3333	2.81	0.00272	up	SAT
exposure to 34°C	negative regulation of bone mineralization	15	8	53.3333	2.81	0.00272	up	SAT
exposure to 34°C	response to cytokine	664	25	3.76506	17.41	1.3e-05	down	VAT
exposure to 34°C	regulation of CD8-positive, alpha-beta T cell activation	15	8	53.3333	2.81	0.00272	up	SAT
exposure to 34°C	positive regulation of astrocyte differentiation	13	7	53.8462	2.43	0.00474	up	SAT
exposure to 34°C	positive regulation of T cell receptor signaling pathway	13	7	53.8462	2.43	0.00474	up	SAT
exposure to 34°C	somatic hypermutation of immunoglobulin genes	13	7	53.8462	2.43	0.00474	up	SAT
exposure to 34°C	cellular defense response	11	6	54.5455	2.06	0.00831	up	SAT
exposure to 34°C	keratinization	11	6	54.5455	2.06	0.00831	up	SAT
exposure to 34°C	response to cytokine	625	134	21.44	95.12	0.00267	up	BAT
exposure to 34°C	negative regulation of B cell apoptotic process	11	6	54.5455	2.06	0.00831	up	SAT
exposure to 34°C	positive regulation of antigen processing and presentation	11	6	54.5455	2.06	0.00831	up	SAT
exposure to 34°C	response to fatty acid	37	6	16.2162	1.3	0.00040	up	liver
exposure to 34°C	positive regulation of heterotypic cell-cell adhesion	11	6	54.5455	2.06	0.00831	up	SAT
exposure to 34°C	response to fatty acid	39	7	17.9487	1.18	8.9e-05	down	QC
exposure to 34°C	positive regulation of interleukin-8 biosynthetic process	11	6	54.5455	2.06	0.00831	up	SAT
exposure to 34°C	positive regulation of protein polyubiquitination	11	6	54.5455	2.06	0.00831	up	SAT
exposure to 34°C	response to fatty acid	44	11	25	3.53	0.00367	down	BAT
exposure to 34°C	vitamin D metabolic process	11	6	54.5455	2.06	0.00831	up	SAT
exposure to 34°C	CD4-positive, alpha-beta T cell cytokine production	18	10	55.5556	3.37	0.00084	up	SAT
exposure to 34°C	positive regulation of alpha-beta T cell differentiation	43	24	55.814	8.05	0.00254	up	SAT
exposure to 34°C	negative regulation of T cell apoptotic process	21	12	57.1429	3.93	9.8e-05	up	SAT
exposure to 34°C	positive regulation of interleukin-13 production	12	7	58.3333	2.25	0.00261	up	SAT
exposure to 34°C	negative regulation of T cell receptor signaling pathway	17	10	58.8235	3.18	0.00028	up	SAT
exposure to 34°C	antigen processing and presentation of endogenous peptide antigen via MHC class I via ER pathway	10	6	60	1.87	0.00449	up	SAT
exposure to 34°C	antigen processing and presentation of endogenous peptide antigen via MHC class Ib	10	6	60	1.87	0.00449	up	SAT
exposure to 34°C	Peyer's patch development	10	6	60	1.87	0.00449	up	SAT
exposure to 34°C	positive regulation of killing of cells of other organism	10	6	60	1.87	0.00449	up	SAT
exposure to 34°C	regulation of fever generation	10	6	60	1.87	0.00449	up	SAT
exposure to 34°C	regulation of toll-like receptor 2 signaling pathway	10	6	60	1.87	0.00449	up	SAT
exposure to 34°C	signal transduction involved in mitotic G1 DNA damage checkpoint	10	6	60	1.87	0.00449	up	SAT
exposure to 34°C	positive regulation of CREB transcription factor activity	16	10	62.5	2.99	0.00014	up	SAT
exposure to 34°C	negative regulation of bone remodeling	11	7	63.6364	2.06	0.00129	up	SAT
exposure to 34°C	negative regulation of hormone biosynthetic process	11	7	63.6364	2.06	0.00129	up	SAT
exposure to 34°C	neurotransmitter-gated ion channel clustering	11	7	63.6364	2.06	0.00129	up	SAT
exposure to 34°C	positive regulation of monocyte chemotactic protein-1 production	11	7	63.6364	2.06	0.00129	up	SAT
exposure to 34°C	detection of mechanical stimulus involved in sensory perception of pain	12	8	66.6667	2.25	0.00036	up	SAT
exposure to 34°C	regulation of cell-cell adhesion mediated by integrin	12	8	66.6667	2.25	0.00036	up	SAT
exposure to 34°C	tolerance induction	25	17	68	4.68	0.00114	up	SAT
exposure to 34°C	retrograde trans-synaptic signaling	12	4	33.3333	0.43	0.00064	up	ileum
exposure to 34°C	retrograde trans-synaptic signaling	10	4	40	0.8	0.00582	down	BAT
exposure to 34°C	thrombin-activated receptor signaling pathway	10	7	70	1.87	0.00056	up	SAT
exposure to 34°C	detection of bacterium	14	10	71.4286	2.62	2.5e-05	up	SAT
exposure to 34°C	neuron development	896	17	1.89732	11.12	0.01000	up	QC
exposure to 34°C	embryonic skeletal system morphogenesis	84	5	5.95238	1.04	0.00387	up	QC
exposure to 34°C	hindlimb morphogenesis	33	3	9.09091	0.41	0.00778	up	QC
exposure to 34°C	photoreceptor cell maintenance	28	4	14.2857	0.35	0.00037	up	QC
exposure to 34°C	detection of light stimulus	20	3	15	0.25	0.00403	up	QC
exposure to 34°C	proximal/distal pattern formation	24	4	16.6667	0.3	0.00020	up	QC
exposure to 34°C	negative regulation of long-term synaptic potentiation	11	2	18.1818	0.14	0.00782	up	QC
exposure to 34°C	short-chain fatty acid metabolic process	12	3	25	0.36	0.00488	down	QC
exposure to 34°C	short-chain fatty acid metabolic process	12	3	25	0.42	0.00746	up	liver
exposure to 34°C	response to auditory stimulus	15	4	26.6667	0.19	2.8e-05	up	QC
exposure to 34°C	immune response to tumor cell	10	2	20	0.12	0.00645	up	QC
exposure to 34°C	lymphocyte differentiation	262	18	6.87023	9.2	0.00119	up	liver
exposure to 34°C	cellular response to tumor necrosis factor	100	8	8	3.51	0.00936	up	liver
exposure to 34°C	short-chain fatty acid metabolic process	12	6	50	0.96	0.00016	down	BAT
exposure to 34°C	short-chain fatty acid metabolic process	12	9	75	1.25	2.4e-07	down	SAT
exposure to 34°C	regulation of ATPase activity	50	4	8	1.76	0.00703	up	liver
exposure to 34°C	sterol metabolic process	112	11	9.82143	3.93	0.00686	up	liver
exposure to 34°C	cellular response to hypoxia	76	9	11.8421	2.67	0.00123	up	liver
exposure to 34°C	actin-mediated cell contraction	52	7	13.4615	1.83	0.00112	up	liver
exposure to 34°C	dorsal/ventral pattern formation	58	8	13.7931	2.04	0.00544	up	liver
exposure to 34°C	protein localization to cilium	41	6	14.6341	1.44	0.00413	up	liver
exposure to 34°C	positive regulation of monooxygenase activity	19	3	15.7895	0.67	0.00702	up	liver
exposure to 34°C	regulation of actin filament-based movement	31	5	16.129	1.09	0.00040	up	liver
exposure to 34°C	fat-soluble vitamin metabolic process	22	4	18.1818	0.77	0.00663	up	liver
exposure to 34°C	positive regulation of interleukin-6 secretion	22	4	18.1818	0.77	0.00663	up	liver
exposure to 34°C	neural tube patterning	32	6	18.75	1.12	0.00565	up	liver
exposure to 34°C	positive regulation of steroid biosynthetic process	21	4	19.0476	0.74	0.00558	up	liver
exposure to 34°C	negative regulation of amine transport	13	3	23.0769	0.46	0.00945	up	liver
exposure to 34°C	regulation of adenylate cyclase activity	13	3	23.0769	0.46	0.00945	up	liver
exposure to 34°C	regulation of protein kinase A signaling	13	3	23.0769	0.46	0.00945	up	liver
exposure to 34°C	mammary gland alveolus development	17	4	23.5294	0.6	0.00248	up	liver
exposure to 34°C	embryonic digestive tract morphogenesis	12	3	25	0.42	0.00746	up	liver
exposure to 34°C	intraciliary retrograde transport	12	3	25	0.42	0.00746	up	liver
exposure to 34°C	positive regulation of icosanoid secretion	12	3	25	0.42	0.00746	up	liver
exposure to 34°C	protein localization to early endosome	11	3	27.2727	0.39	0.00574	up	liver
exposure to 34°C	regulation of prostaglandin secretion	11	3	27.2727	0.39	0.00574	up	liver
exposure to 34°C	T cell activation	409	99	24.2054	23.62	6.7e-05	down	ileum
exposure to 34°C	chemosensory behavior	10	3	30	0.35	0.00429	up	liver
exposure to 34°C	diet induced thermogenesis	10	3	30	0.35	0.00429	up	liver
exposure to 34°C	mesodermal cell differentiation	10	3	30	0.35	0.00429	up	liver
exposure to 34°C	T cell activation	413	202	48.9104	77.28	0.00105	up	SAT
exposure to 34°C	regulation of protein localization to endosome	10	3	30	0.35	0.00429	up	liver
exposure to 34°C	sodium-independent organic anion transport	10	3	30	0.35	0.00429	up	liver
exposure to 34°C	signal transduction involved in regulation of gene expression	13	4	30.7692	0.46	0.00083	up	liver
exposure to 34°C	response to dietary excess	17	6	35.2941	0.6	0.00133	up	liver
exposure to 34°C	heat generation	14	5	35.7143	0.49	8.0e-05	up	liver
exposure to 34°C	regulation of actomyosin structure organization	91	4	4.3956	3.26	0.00616	up	ileum
exposure to 34°C	synaptic vesicle cycle	189	10	5.29101	6.78	0.00223	up	ileum
exposure to 34°C	locomotory behavior	192	14	7.29167	6.88	0.00178	up	ileum
exposure to 34°C	T cell costimulation	28	9	32.1429	1.62	1.7e-05	down	ileum
exposure to 34°C	memory	123	11	8.94309	4.41	0.00728	up	ileum
exposure to 34°C	cartilage development	162	15	9.25926	5.81	0.00063	up	ileum
exposure to 34°C	T cell costimulation	28	18	64.2857	5.24	1.4e-07	up	SAT
exposure to 34°C	sodium ion transmembrane transport	86	8	9.30233	3.08	0.00593	up	ileum
exposure to 34°C	sodium ion transport	161	15	9.31677	5.77	0.00286	up	ileum
exposure to 34°C	lipid transport	269	26	9.66543	9.64	0.00323	up	ileum
exposure to 34°C	glucose transmembrane transport	92	9	9.78261	3.3	0.00043	up	ileum
exposure to 34°C	drug transport	143	15	10.4895	5.13	1.1e-05	up	ileum
exposure to 34°C	amine transport	85	9	10.5882	3.05	0.00369	up	ileum
exposure to 34°C	positive regulation of phospholipid metabolic process	36	4	11.1111	1.29	0.00790	up	ileum
exposure to 34°C	positive regulation of lipid transport	57	7	12.2807	2.04	0.00330	up	ileum
exposure to 34°C	T cell homeostasis	40	8	20	2.31	0.00067	down	ileum
exposure to 34°C	neurotransmitter biosynthetic process	87	11	12.6437	3.12	0.00110	up	ileum
exposure to 34°C	unsaturated fatty acid metabolic process	63	8	12.6984	2.26	0.00126	up	ileum
exposure to 34°C	T cell homeostasis	41	20	48.7805	7.67	6.6e-06	up	SAT
exposure to 34°C	positive regulation of potassium ion transmembrane transport	36	5	13.8889	1.29	0.00122	up	ileum
exposure to 34°C	T cell mediated immunity	97	18	18.5567	5.6	0.00251	down	ileum
exposure to 34°C	T cell mediated immunity	91	45	49.4505	17.03	0.00122	up	SAT
exposure to 34°C	axonal fasciculation	23	4	17.3913	0.82	0.00840	up	ileum
exposure to 34°C	negative regulation of neurotransmitter transport	23	4	17.3913	0.82	0.00998	up	ileum
exposure to 34°C	T cell migration	51	14	27.451	2.94	1.1e-05	down	ileum
exposure to 34°C	eating behavior	34	6	17.6471	1.22	0.00118	up	ileum
exposure to 34°C	positive regulation of fatty acid biosynthetic process	22	4	18.1818	0.79	0.00714	up	ileum
exposure to 34°C	alpha-amino acid catabolic process	60	11	18.3333	2.15	0.00056	up	ileum
exposure to 34°C	regulation of sensory perception of pain	38	7	18.4211	1.36	0.00035	up	ileum
exposure to 34°C	antibiotic catabolic process	29	6	20.6897	1.04	0.00013	up	ileum
exposure to 34°C	regulation of feeding behavior	21	5	23.8095	0.75	0.00073	up	ileum
exposure to 34°C	T cell migration	49	22	44.898	9.17	0.00120	up	SAT
exposure to 34°C	behavioral response to cocaine	12	3	25	0.43	0.00791	up	ileum
exposure to 34°C	glutamine family amino acid catabolic process	20	5	25	0.72	0.00058	up	ileum
exposure to 34°C	peptidyl-cysteine S-nitrosylation	12	3	25	0.43	0.00791	up	ileum
exposure to 34°C	synaptonemal complex assembly	12	3	25	0.43	0.00791	up	ileum
exposure to 34°C	negative regulation of catecholamine secretion	11	3	27.2727	0.39	0.00609	up	ileum
exposure to 34°C	pyrimidine nucleoside metabolic process	11	3	27.2727	0.39	0.00609	up	ileum
exposure to 34°C	negative regulation of nitric-oxide synthase activity	10	3	30	0.36	0.00455	up	ileum
exposure to 34°C	phospholipid efflux	10	3	30	0.36	0.00455	up	ileum
exposure to 34°C	retinol metabolic process	18	6	33.3333	0.65	2.6e-05	up	ileum
exposure to 34°C	regulation of triglyceride catabolic process	11	4	36.3636	0.39	0.00044	up	ileum
exposure to 34°C	negative regulation of NIK/NF-kappaB signaling	18	2	11.1111	0.12	0.00634	up	brain
exposure to 34°C	positive regulation of endothelial cell apoptotic process	18	2	11.1111	0.12	0.00634	up	brain
exposure to 34°C	positive regulation of endothelial cell chemotaxis	17	2	11.7647	0.11	0.00566	up	brain
exposure to 34°C	negative regulation of stem cell proliferation	14	2	14.2857	0.09	0.00384	up	brain
exposure to 34°C	regulation of monocyte chemotactic protein-1 production	14	2	14.2857	0.09	0.00384	up	brain
exposure to 34°C	negative regulation of acute inflammatory response	11	2	18.1818	0.07	0.00235	up	brain
exposure to 34°C	response to hormone	498	76	15.261	75.79	0.00169	up	BAT
exposure to 34°C	positive regulation of gene expression	1672	277	16.567	254.47	0.00849	up	BAT
exposure to 34°C	terpenoid biosynthetic process	11	2	18.1818	0.14	0.00782	up	QC
exposure to 34°C	positive regulation of leukocyte mediated cytotoxicity	42	7	16.6667	6.39	0.00353	up	BAT
exposure to 34°C	axon regeneration	41	7	17.0732	6.24	0.00502	up	BAT
exposure to 34°C	cellular response to organic substance	1631	283	17.3513	248.23	0.00263	up	BAT
exposure to 34°C	terpenoid biosynthetic process	12	3	25	0.31	0.00330	down	VAT
exposure to 34°C	terpenoid biosynthetic process	12	5	41.6667	0.96	0.00161	down	BAT
exposure to 34°C	smoothened signaling pathway	115	20	17.3913	17.5	0.00691	up	BAT
exposure to 34°C	regulation of protein localization	835	153	18.3234	127.08	0.00979	up	BAT
exposure to 34°C	cell-substrate adhesion	277	53	19.1336	42.16	0.00792	up	BAT
exposure to 34°C	negative regulation of signal transduction	945	181	19.1534	143.82	0.00336	up	BAT
exposure to 34°C	stress-activated MAPK cascade	213	41	19.2488	32.42	0.00053	up	BAT
exposure to 34°C	regulation of signal transduction	2106	413	19.6106	320.52	0.00024	up	BAT
exposure to 34°C	pattern specification process	294	59	20.068	44.75	0.00866	up	BAT
exposure to 34°C	cation transmembrane transport	451	91	20.1774	68.64	0.00844	up	BAT
exposure to 34°C	actin cytoskeleton organization	545	113	20.7339	82.95	0.00195	up	BAT
exposure to 34°C	negative regulation of leukocyte differentiation	83	18	21.6867	12.63	0.00350	up	BAT
exposure to 34°C	regulation of anatomical structure morphogenesis	831	187	22.503	126.47	0.00489	up	BAT
exposure to 34°C	epithelial cell differentiation	386	87	22.5389	58.75	0.00370	up	BAT
exposure to 34°C	transmembrane transport	747	40	5.35475	21.79	0.0055	down	liver
exposure to 34°C	transmembrane transport	955	57	5.96859	34.24	0.00120	up	ileum
exposure to 34°C	actin filament bundle assembly	141	32	22.695	21.46	0.00165	up	BAT
exposure to 34°C	negative regulation of neuron apoptotic process	133	31	23.3083	20.24	0.00878	up	BAT
exposure to 34°C	Rho protein signal transduction	168	40	23.8095	25.57	0.00414	up	BAT
exposure to 34°C	transmembrane transport	832	104	12.5	66.7	0.00292	down	BAT
exposure to 34°C	glial cell development	88	21	23.8636	13.39	0.00593	up	BAT
exposure to 34°C	negative regulation of cell migration	216	52	24.0741	32.87	0.00284	up	BAT
exposure to 34°C	negative regulation of cell growth	158	39	24.6835	24.05	0.00870	up	BAT
exposure to 34°C	cell migration	1106	274	24.774	168.33	0.00311	up	BAT
exposure to 34°C	positive regulation of protein localization to membrane	76	19	25	11.57	0.00237	up	BAT
exposure to 34°C	positive regulation of endothelial cell proliferation	75	19	25.3333	11.41	0.00335	up	BAT
exposure to 34°C	acid secretion	66	17	25.7576	10.04	0.00442	up	BAT
exposure to 34°C	monocarboxylic acid transport	92	24	26.087	14	6.9e-06	up	BAT
exposure to 34°C	positive regulation of epithelial cell proliferation	153	40	26.1438	23.29	0.00507	up	BAT
exposure to 34°C	positive regulation of reproductive process	53	14	26.4151	8.07	0.00169	up	BAT
exposure to 34°C	adenylate cyclase-activating G protein-coupled receptor signaling pathway	60	16	26.6667	9.13	0.00223	up	BAT
exposure to 34°C	mitotic cytokinesis	64	18	28.125	9.74	0.00034	up	BAT
exposure to 34°C	regulation of epithelial cell apoptotic process	70	21	30	10.65	0.00348	up	BAT
exposure to 34°C	negative regulation of DNA binding	43	13	30.2326	6.54	0.00812	up	BAT
exposure to 34°C	triglyceride homeostasis	29	5	17.2414	1.04	0.00338	up	ileum
exposure to 34°C	osteoblast proliferation	23	7	30.4348	3.5	0.00352	up	BAT
exposure to 34°C	positive regulation of cytokine production	336	103	30.6548	51.14	0.00250	up	BAT
exposure to 34°C	positive regulation of fibroblast proliferation	58	18	31.0345	8.83	0.00179	up	BAT
exposure to 34°C	positive regulation of myeloid leukocyte mediated immunity	29	9	31.0345	4.41	0.00892	up	BAT
exposure to 34°C	regulation of T cell apoptotic process	35	11	31.4286	5.33	0.00350	up	BAT
exposure to 34°C	lymphocyte chemotaxis	41	13	31.7073	6.24	0.00295	up	BAT
exposure to 34°C	positive regulation of angiogenesis	145	47	32.4138	22.07	2.0e-07	up	BAT
exposure to 34°C	negative regulation of angiogenesis	92	30	32.6087	14	7.6e-06	up	BAT
exposure to 34°C	triglyceride homeostasis	26	7	26.9231	0.68	3.4e-06	down	VAT
exposure to 34°C	positive regulation of smooth muscle cell migration	58	19	32.7586	8.83	0.00476	up	BAT
exposure to 34°C	positive regulation of tumor necrosis factor production	89	30	33.7079	13.55	0.00012	up	BAT
exposure to 34°C	vasculogenesis	74	25	33.7838	11.26	0.00133	up	BAT
exposure to 34°C	positive regulation of phagocytosis	59	20	33.8983	8.98	0.00018	up	BAT
exposure to 34°C	bicellular tight junction assembly	32	11	34.375	4.87	0.00888	up	BAT
exposure to 34°C	defense response to Gram-negative bacterium	29	10	34.4828	4.41	0.00815	up	BAT
exposure to 34°C	triglyceride homeostasis	26	9	34.6154	2.72	0.00087	down	SAT
exposure to 34°C	respiratory burst	20	7	35	3.04	0.00149	up	BAT
exposure to 34°C	positive regulation of reactive oxygen species biosynthetic process	45	16	35.5556	6.85	0.00591	up	BAT
exposure to 34°C	L-alpha-amino acid transmembrane transport	25	9	36	3.8	0.00137	up	BAT
exposure to 34°C	regulation of heart rate by cardiac conduction	25	9	36	3.8	0.00870	up	BAT
exposure to 34°C	monocyte chemotaxis	39	15	38.4615	5.94	0.00891	up	BAT
exposure to 34°C	positive regulation of interleukin-1 beta secretion	26	10	38.4615	3.96	0.00333	up	BAT
exposure to 34°C	regulation of interleukin-17 production	18	7	38.8889	2.74	0.00304	up	BAT
exposure to 34°C	regulation of protein homooligomerization	18	7	38.8889	2.74	0.00304	up	BAT
exposure to 34°C	glial cell proliferation	43	17	39.5349	6.54	0.00135	up	BAT
exposure to 34°C	unsaturated fatty acid biosynthetic process	29	4	13.7931	0.76	0.00034	down	VAT
exposure to 34°C	unsaturated fatty acid biosynthetic process	30	5	16.6667	0.9	9.1e-05	down	QC
exposure to 34°C	positive regulation of leukocyte chemotaxis	68	27	39.7059	10.35	0.00144	up	BAT
exposure to 34°C	branch elongation of an epithelium	17	7	41.1765	2.59	0.00892	up	BAT
exposure to 34°C	unsaturated fatty acid biosynthetic process	30	7	23.3333	2.4	0.00371	down	BAT
exposure to 34°C	unsaturated fatty acid biosynthetic process	29	7	24.1379	1.02	1.0e-06	up	liver
exposure to 34°C	positive regulation of extracellular matrix organization	17	7	41.1765	2.59	0.00892	up	BAT
exposure to 34°C	positive regulation of kidney development	29	12	41.3793	4.41	0.00598	up	BAT
exposure to 34°C	very long-chain fatty acid metabolic process	21	4	19.0476	0.74	0.00558	up	liver
exposure to 34°C	cGMP-mediated signaling	21	9	42.8571	3.2	0.00222	up	BAT
exposure to 34°C	endothelial tube morphogenesis	16	7	43.75	2.44	0.00603	up	BAT
exposure to 34°C	regulation of urine volume	16	7	43.75	2.44	0.00603	up	BAT
exposure to 34°C	positive regulation of cellular extravasation	20	9	45	3.04	0.00146	up	BAT
exposure to 34°C	cell-cell junction maintenance	13	6	46.1538	1.98	0.00807	up	BAT
exposure to 34°C	mitotic DNA replication	13	6	46.1538	1.98	0.00807	up	BAT
exposure to 34°C	myelin maintenance	13	6	46.1538	1.98	0.00807	up	BAT
exposure to 34°C	very long-chain fatty acid metabolic process	19	10	52.6316	1.99	5.7e-06	down	SAT
exposure to 34°C	regulation of platelet activation	28	13	46.4286	4.26	0.00613	up	BAT
exposure to 34°C	very long-chain fatty acid metabolic process	22	12	54.5455	1.76	2.0e-08	down	BAT
exposure to 34°C	killing of cells of other organism	15	7	46.6667	2.28	0.00390	up	BAT
exposure to 34°C	positive regulation of superoxide anion generation	17	8	47.0588	2.59	0.00190	up	BAT
exposure to 34°C	regulation of macrophage migration	34	16	47.0588	5.17	8.0e-05	up	BAT
exposure to 34°C	DNA strand elongation involved in DNA replication	12	6	50	1.83	0.00498	up	BAT
exposure to 34°C	heart valve formation	12	6	50	1.83	0.00498	up	BAT
exposure to 34°C	visual perception	113	4	3.53982	0.76	0.00698	up	brain
exposure to 34°C	inflammatory response to wounding	12	6	50	1.83	0.00498	up	BAT
exposure to 10°C	cardiac muscle contraction	101	19	18.8119	10.56	0.00632	down	SAT
exposure to 34°C	response to peptidoglycan	12	6	50	1.83	0.00498	up	BAT
exposure to 34°C	visual perception	61	7	11.4754	1.78	0.0019	down	liver
exposure to 34°C	xenobiotic catabolic process	17	4	23.5294	0.61	0.00268	up	ileum
exposure to 34°C	synaptonemal complex organization	12	6	50	1.83	0.00498	up	BAT
exposure to 34°C	toll-like receptor 2 signaling pathway	14	7	50	2.13	0.00239	up	BAT
exposure to 34°C	neuromuscular synaptic transmission	19	10	52.6316	2.89	0.00016	up	BAT
exposure to 34°C	xenobiotic catabolic process	15	10	66.6667	1.57	2.8e-07	down	SAT
exposure to 34°C	negative regulation of chondrocyte differentiation	15	8	53.3333	2.28	0.00067	up	BAT
exposure to 34°C	cellular monovalent inorganic anion homeostasis	11	6	54.5455	1.67	0.00285	up	BAT
exposure to 34°C	regulation of T-helper 1 type immune response	23	8	34.7826	3.5	0.00351	up	BAT
exposure to 34°C	positive regulation of macrophage chemotaxis	18	10	55.5556	2.74	8.8e-05	up	BAT
exposure to 34°C	blood vessel endothelial cell proliferation involved in sprouting angiogenesis	16	9	56.25	2.44	0.00616	up	BAT
exposure to 34°C	eosinophil chemotaxis	14	8	57.1429	2.13	0.00036	up	BAT
exposure to 34°C	branching involved in labyrinthine layer morphogenesis	10	6	60	1.52	0.00149	up	BAT
exposure to 34°C	dendritic cell antigen processing and presentation	10	6	60	1.52	0.00149	up	BAT
exposure to 34°C	positive regulation of immune response	354	81	22.8814	53.88	0.00040	up	BAT
exposure to 34°C	regulation of innate immune response	140	29	20.7143	21.31	0.00493	up	BAT
exposure to 34°C	basic amino acid transport	10	7	70	1.52	0.00015	up	BAT
exposure to 34°C	T cell tolerance induction	10	7	70	1.52	0.00015	up	BAT
exposure to 34°C	carboxylic acid transmembrane transport	81	5	6.17284	2.12	0.00838	down	VAT
exposure to 34°C	carboxylic acid transmembrane transport	73	6	8.21918	2.2	0.00159	down	Quadriceps
exposure to 34°C	fatty acid biosynthetic process	98	11	11.2245	2.96	0.00709	down	Quadriceps
exposure to 34°C	fatty acid biosynthetic process	102	15	14.7059	2.67	8.6e-05	down	VAT
exposure to 34°C	phospholipid homeostasis	10	2	20	0.12	0.00645	down	Brain
exposure to 34°C	carboxylic acid transmembrane transport	74	15	20.2703	5.93	0.00022	down	BAT
exposure to 34°C	carboxylic acid transmembrane transport	81	17	20.9877	8.47	5.8e-06	down	SAT
exposure to 34°C	negative regulation of lipid catabolic process	15	4	26.6667	0.45	0.00085	down	Quadriceps
exposure to 34°C	fatty acid biosynthetic process	104	29	27.8846	8.34	5.2e-07	down	BAT
exposure to 34°C	negative regulation of lipid catabolic process	19	6	31.5789	0.5	6.3e-06	down	VAT
exposure to 34°C	fatty acid biosynthetic process	102	34	33.3333	10.66	1.0e-09	down	SAT
exposure to 34°C	negative regulation of lipid catabolic process	17	7	41.1765	1.36	0.00020	down	BAT
exposure to 34°C	phospholipid homeostasis	12	5	41.6667	0.31	8.2e-06	down	VAT
exposure to 34°C	negative regulation of lipid catabolic process	19	9	47.3684	1.99	5.1e-05	down	SAT
exposure to 34°C	phospholipid homeostasis	12	6	50	1.25	0.00068	down	SAT
exposure to 34°C	phospholipid homeostasis	10	5	50	0.8	0.00059	down	BAT
exposure to 34°C	ribose phosphate biosynthetic process	128	7	5.46875	3.86	0.00051	down	Quadriceps
exposure to 34°C	response to insulin	187	11	5.88235	5.64	0.00525	down	Quadriceps
exposure to 34°C	fatty acid catabolic process	84	7	8.33333	2.53	0.00382	down	Quadriceps
exposure to 34°C	lipid storage	60	5	8.33333	1.81	0.00458	down	Quadriceps
exposure to 34°C	regulation of digestive system process	36	3	8.33333	0.45	0.00640	down	Brain
exposure to 34°C	phospholipid biosynthetic process	141	12	8.51064	3.7	0.00482	down	VAT
exposure to 34°C	ribose phosphate biosynthetic process	129	12	9.30233	3.38	0.00920	down	VAT
exposure to 34°C	response to insulin	186	18	9.67742	14.91	0.00810	down	BAT
exposure to 34°C	fatty acid metabolic process	264	26	9.84848	7.96	0.00356	down	Quadriceps
exposure to 34°C	gluconeogenesis	54	6	11.1111	1.42	0.00909	down	VAT
exposure to 34°C	pyruvate metabolic process	90	11	12.2222	2.36	0.00026	down	VAT
exposure to 34°C	response to insulin	194	28	14.433	20.28	0.00721	down	SAT
exposure to 34°C	regulation of digestive system process	24	4	16.6667	0.72	0.00536	down	Quadriceps
exposure to 34°C	phospholipid biosynthetic process	134	28	20.8955	10.74	1.0e-05	down	BAT
exposure to 34°C	lipid storage	61	13	21.3115	4.89	0.00087	down	BAT
exposure to 34°C	phospholipid biosynthetic process	141	31	21.9858	14.74	0.00108	down	SAT
exposure to 34°C	gluconeogenesis	49	11	22.449	3.93	0.00020	down	BAT
exposure to 34°C	negative regulation of lipase activity	13	3	23.0769	0.38	0.0057	down	liver
exposure to 34°C	ribose phosphate biosynthetic process	125	29	23.2	10.02	0.00814	down	BAT
exposure to 34°C	positive regulation of triglyceride biosynthetic process	16	4	25	0.42	0.00066	down	VAT
exposure to 34°C	pentose-phosphate shunt	11	3	27.2727	0.29	0.00252	down	VAT
exposure to 34°C	cholesterol biosynthetic process	39	11	28.2051	1.02	3.0e-10	down	VAT
exposure to 34°C	cholesterol biosynthetic process	38	11	28.9474	3.05	5.7e-05	down	BAT
exposure to 34°C	lipid storage	63	19	30.1587	6.59	0.00113	down	SAT
exposure to 34°C	fatty acid metabolic process	278	86	30.9353	22.29	4.2e-08	down	BAT
exposure to 34°C	acetyl-CoA metabolic process	31	10	32.2581	0.81	0.00035	down	VAT
exposure to 34°C	pyruvate metabolic process	90	31	34.4444	7.21	0.00014	down	BAT
exposure to 34°C	gluconeogenesis	54	19	35.1852	5.65	1.0e-07	down	SAT
exposure to 34°C	acetyl-CoA biosynthetic process	17	6	35.2941	0.45	0.00938	down	VAT
exposure to 34°C	regulation of digestive system process	28	10	35.7143	2.93	0.00318	down	SAT
exposure to 34°C	fatty acid catabolic process	86	31	36.0465	6.89	0.00024	down	BAT
exposure to 34°C	acetyl-CoA biosynthetic process from pyruvate	11	4	36.3636	0.29	0.00013	down	VAT
exposure to 34°C	pyruvate metabolic process	90	36	40	9.41	0.00106	down	SAT
exposure to 34°C	triglyceride catabolic process	15	6	40	1.2	0.00070	down	BAT
exposure to 34°C	cholesterol biosynthetic process	39	16	41.0256	4.08	1.7e-05	down	SAT
exposure to 34°C	fatty acid metabolic process	274	114	41.6058	28.65	8.5e-07	down	SAT
exposure to 34°C	positive regulation of triglyceride biosynthetic process	16	7	43.75	1.28	0.00012	down	BAT
exposure to 34°C	triglyceride catabolic process	17	8	47.0588	0.45	4.1e-09	down	VAT
exposure to 34°C	negative regulation of lipase activity	14	7	50	0.37	2.3e-08	down	VAT
exposure to 34°C	positive regulation of triglyceride biosynthetic process	16	8	50	1.67	8.3e-05	down	SAT
exposure to 34°C	triglyceride catabolic process	17	9	52.9412	1.78	1.6e-05	down	SAT
exposure to 34°C	negative regulation of lipase activity	14	8	57.1429	1.46	2.4e-05	down	SAT
exposure to 34°C	fatty acid catabolic process	85	49	57.6471	8.89	3.9e-05	down	SAT
exposure to 34°C	pentose-phosphate shunt	11	7	63.6364	1.15	3.0e-05	down	SAT
exposure to 34°C	pentose-phosphate shunt	11	7	63.6364	0.88	5.2e-06	down	BAT
exposure to 34°C	acetyl-CoA metabolic process	31	21	67.7419	3.24	2.2e-05	down	SAT
exposure to 34°C	acetyl-CoA metabolic process	29	21	72.4138	2.32	5.6e-07	down	BAT
exposure to 34°C	acetyl-CoA biosynthetic process	17	13	76.4706	1.78	0.00147	down	SAT
exposure to 34°C	acetyl-CoA biosynthetic process	17	13	76.4706	1.36	0.00052	down	BAT
exposure to 34°C	acetyl-CoA biosynthetic process from pyruvate	11	9	81.8182	1.15	6.6e-08	down	SAT
exposure to 34°C	acetyl-CoA biosynthetic process from pyruvate	11	9	81.8182	0.88	6.3e-09	down	BAT
exposure to 34°C	mitochondrial electron transport, NADH to ubiquinone	18	16	88.8889	1.88	2.3e-14	down	SAT
exposure to 34°C	mitochondrial respiratory chain complex I assembly	40	33	82.5	4.18	2.7e-26	down	SAT
exposure to 34°C	fatty acid beta-oxidation using acyl-CoA dehydrogenase	10	8	80	1.05	5.2e-07	down	SAT
exposure to 34°C	tricarboxylic acid cycle	27	21	77.7778	2.82	3.5e-16	down	SAT
exposure to 34°C	mitochondrial ATP synthesis coupled electron transport	48	37	77.0833	5.02	1.0e-14	down	SAT
exposure to 34°C	2-oxoglutarate metabolic process	13	10	76.9231	1.36	3.2e-08	down	SAT
exposure to 34°C	ATP synthesis coupled proton transport	17	13	76.4706	1.78	2.7e-10	down	SAT
exposure to 34°C	electron transport chain	71	51	71.831	7.42	0.00383	down	SAT
exposure to 34°C	respiratory electron transport chain	67	48	71.6418	7.01	2.4e-06	down	SAT
exposure to 34°C	oxaloacetate metabolic process	10	7	70	1.05	1.2e-05	down	SAT
exposure to 34°C	acyl-CoA biosynthetic process	23	16	69.5652	1.84	0.00826	down	BAT
exposure to 34°C	mitochondrial respiratory chain complex assembly	65	45	69.2308	6.8	0.00032	down	SAT
exposure to 34°C	cristae formation	14	9	64.2857	1.46	1.8e-06	down	SAT
exposure to 34°C	acute-phase response	18	4	22.2222	0.54	0.00178	down	Quadriceps
exposure to 34°C	regulation of sequestering of triglyceride	11	7	63.6364	1.15	3.0e-05	down	SAT
exposure to 34°C	oxidative phosphorylation	79	50	63.2911	8.26	0.00528	down	SAT
exposure to 34°C	acute-phase response	29	6	20.6897	0.76	0.00065	down	VAT
exposure to 34°C	tricarboxylic acid metabolic process	13	8	61.5385	1.36	1.1e-05	down	SAT
exposure to 34°C	aerobic respiration	61	37	60.6557	6.38	5.4e-08	down	SAT
exposure to 34°C	cardiac muscle fiber development	15	6	40	1.57	0.00281	down	SAT
exposure to 34°C	amino-acid betaine metabolic process	10	6	60	1.05	0.00019	down	SAT
exposure to 34°C	glycerol ether metabolic process	10	6	60	1.05	0.00019	down	SAT
exposure to 34°C	ubiquinone biosynthetic process	15	9	60	1.57	4.1e-06	down	SAT
exposure to 34°C	NADH metabolic process	27	16	59.2593	2.82	8.0e-10	down	SAT
exposure to 34°C	fatty acid oxidation	88	51	57.9545	9.2	0.00159	down	SAT
exposure to 34°C	inner mitochondrial membrane organization	25	14	56	2.61	0.00325	down	SAT
exposure to 34°C	monocarboxylic acid catabolic process	98	54	55.102	10.25	0.00680	down	SAT
exposure to 34°C	dicarboxylic acid catabolic process	11	6	54.5455	1.15	0.00038	down	SAT
exposure to 34°C	mitochondrial transcription	11	6	54.5455	1.15	0.00038	down	SAT
exposure to 34°C	serine family amino acid catabolic process	11	6	54.5455	1.15	0.00038	down	SAT
exposure to 34°C	acylglycerol catabolic process	26	14	53.8462	2.72	0.00106	down	SAT
exposure to 34°C	cardiac muscle fiber development	17	3	17.6471	0.21	0.00112	down	Brain
exposure to 34°C	cardiolipin metabolic process	11	5	45.4545	1.15	0.00334	down	SAT
exposure to 34°C	protein import into mitochondrial matrix	17	9	52.9412	1.78	1.6e-05	down	SAT
exposure to 34°C	cardiolipin metabolic process	11	4	36.3636	0.88	0.00857	down	BAT
exposure to 34°C	ATP biosynthetic process	41	21	51.2195	4.29	0.00104	down	SAT
exposure to 34°C	catecholamine biosynthetic process	13	3	23.0769	0.38	0.0057	down	liver
exposure to 34°C	catecholamine biosynthetic process	15	3	20	0.45	0.00945	down	Quadriceps
exposure to 34°C	interleukin-12 secretion	10	5	50	0.58	0.00013	down	ileum
exposure to 34°C	regulation of hypersensitivity	10	5	50	0.58	0.00013	down	ileum
exposure to 34°C	T-helper cell lineage commitment	12	6	50	0.69	2.5e-05	down	ileum
exposure to 34°C	mitochondrial protein processing	12	6	50	1.25	0.00068	down	SAT
exposure to 34°C	regulation of apoptotic DNA fragmentation	10	5	50	1.05	0.00199	down	SAT
exposure to 34°C	mitochondrial calcium ion homeostasis	19	9	47.3684	1.99	5.1e-05	down	SAT
exposure to 34°C	cholesterol esterification	11	3	27.2727	0.33	0.00375	down	Quadriceps
exposure to 34°C	cholesterol esterification	12	3	25	0.31	0.00330	down	VAT
exposure to 34°C	cholesterol import	11	5	45.4545	1.15	0.00334	down	SAT
exposure to 34°C	cholesterol import	11	3	27.2727	0.29	0.00252	down	VAT
exposure to 34°C	branched-chain amino acid catabolic process	15	7	46.6667	1.57	0.00041	down	SAT
exposure to 34°C	peroxisome organization	28	13	46.4286	2.93	0.00512	down	SAT
exposure to 34°C	positive regulation of mitochondrial translation	13	6	46.1538	1.04	0.00027	down	BAT
exposure to 34°C	fatty-acyl-CoA metabolic process	13	6	46.1538	1.36	0.00116	down	SAT
exposure to 34°C	fatty acid beta-oxidation	62	39	62.9032	6.48	1.3e-17	down	SAT
exposure to 34°C	fatty acid beta-oxidation	63	23	36.5079	5.05	1.2e-05	down	BAT
exposure to 34°C	glucose metabolic process	150	41	27.3333	15.68	0.00215	down	SAT
exposure to 34°C	inositol metabolic process	11	5	45.4545	0.88	0.00100	down	BAT
exposure to 34°C	positive regulation of interferon-gamma biosynthetic process	11	5	45.4545	0.64	0.00022	down	ileum
exposure to 34°C	sperm capacitation	11	5	45.4545	1.15	0.00334	down	SAT
exposure to 34°C	glucose metabolic process	149	32	21.4765	11.94	0.00125	down	BAT
exposure to 34°C	NADP metabolic process	31	14	45.1613	3.24	0.00213	down	SAT
exposure to 34°C	NAD metabolic process	20	9	45	2.09	8.4e-05	down	SAT
exposure to 34°C	dicarboxylic acid metabolic process	74	33	44.5946	7.74	0.00050	down	SAT
exposure to 34°C	glutathione metabolic process	50	22	44	5.23	2.1e-10	down	SAT
exposure to 34°C	glycerol metabolic process	15	8	53.3333	1.57	4.6e-05	down	SAT
exposure to 34°C	diacylglycerol metabolic process	16	7	43.75	1.67	0.00066	down	SAT
exposure to 34°C	glycerol metabolic process	15	5	33.3333	1.2	0.00498	down	BAT
exposure to 34°C	dendritic cell chemotaxis	14	6	42.8571	0.81	7.3e-05	down	ileum
exposure to 34°C	neurotransmitter catabolic process	14	6	42.8571	1.46	0.00185	down	SAT
exposure to 34°C	hormone catabolic process	16	6	37.5	1.67	0.00410	down	SAT
exposure to 34°C	hormone catabolic process	16	3	18.75	0.42	0.00776	down	VAT
exposure to 34°C	glycolytic process through fructose-6-phosphate	12	5	41.6667	0.96	0.00639	down	BAT
exposure to 34°C	negative regulation of immunoglobulin production	12	5	41.6667	0.69	0.00036	down	ileum
exposure to 34°C	phosphatidic acid biosynthetic process	12	5	41.6667	1.25	0.00523	down	SAT
exposure to 34°C	sarcoplasmic reticulum calcium ion transport	24	10	41.6667	2.51	0.00959	down	SAT
exposure to 34°C	intestinal absorption	23	7	30.4348	2.4	0.00731	down	SAT
exposure to 34°C	intestinal absorption	23	5	21.7391	0.6	0.00027	down	VAT
exposure to 34°C	regulation of release of sequestered calcium ion into cytosol by sarcoplasmic reticulum	17	7	41.1765	1.78	0.00102	down	SAT
exposure to 34°C	response to activity	22	9	40.9091	2.3	0.00020	down	SAT
exposure to 34°C	proton transmembrane transport	64	26	40.625	6.69	0.00756	down	SAT
exposure to 34°C	lipid digestion	10	4	40	0.26	8.6e-05	down	VAT
exposure to 34°C	lipid digestion	12	2	16.6667	0.15	0.00930	down	Brain
exposure to 34°C	lipid droplet organization	17	8	47.0588	1.78	0.00014	down	SAT
exposure to 34°C	calcium ion-regulated exocytosis of neurotransmitter	10	4	40	0.8	0.00582	down	BAT
exposure to 34°C	fructose 6-phosphate metabolic process	10	4	40	0.8	0.00582	down	BAT
exposure to 34°C	melanin biosynthetic process	10	4	40	0.8	0.00582	down	BAT
exposure to 34°C	positive regulation of heat generation	10	4	40	0.8	0.00582	down	BAT
exposure to 34°C	transition between fast and slow fiber	10	4	40	0.8	0.00582	down	BAT
exposure to 34°C	NK T cell activation	10	4	40	0.58	0.00175	down	ileum
exposure to 34°C	regulation of interleukin-10 secretion	10	4	40	0.58	0.00175	down	ileum
exposure to 34°C	benzene-containing compound metabolic process	15	6	40	1.57	0.00281	down	SAT
exposure to 34°C	regulation of cholesterol metabolic process	25	10	40	2.61	0.00330	down	SAT
exposure to 34°C	protein targeting to mitochondrion	63	25	39.6825	6.59	5.3e-06	down	SAT
exposure to 34°C	monocarboxylic acid metabolic process	414	162	39.1304	43.29	2.4e-05	down	SAT
exposure to 34°C	coenzyme metabolic process	174	68	39.0805	18.19	0.00515	down	SAT
exposure to 34°C	lipid droplet organization	17	5	29.4118	1.36	0.00897	down	BAT
exposure to 34°C	lipid homeostasis	112	32	28.5714	11.71	0.00058	down	SAT
exposure to 34°C	positive regulation of lipid storage	18	7	38.8889	1.88	0.00151	down	SAT
exposure to 34°C	removal of superoxide radicals	18	7	38.8889	1.88	0.00151	down	SAT
exposure to 34°C	sulfur compound catabolic process	18	7	38.8889	1.88	0.00151	down	SAT
exposure to 34°C	carbohydrate phosphorylation	13	5	38.4615	1.04	0.00244	down	BAT
exposure to 34°C	regulation of humoral immune response	26	10	38.4615	1.5	0.00172	down	ileum
exposure to 34°C	regulation of isotype switching to IgG isotypes	13	5	38.4615	0.75	0.00955	down	ileum
exposure to 34°C	cytochrome complex assembly	26	10	38.4615	2.72	0.00317	down	SAT
exposure to 34°C	glucose catabolic process	13	5	38.4615	1.36	0.00778	down	SAT
exposure to 34°C	T-helper 17 cell differentiation	21	8	38.0952	1.21	2.6e-06	down	ileum
exposure to 34°C	lipid homeostasis	102	10	9.80392	3.08	0.00015	down	Quadriceps
exposure to 34°C	lipoprotein metabolic process	103	14	13.5922	10.77	0.00055	down	SAT
exposure to 34°C	lipoprotein metabolic process	103	7	6.79612	2.7	0.00641	down	VAT
exposure to 34°C	glycogen catabolic process	16	6	37.5	1.67	0.00410	down	SAT
exposure to 34°C	ketone biosynthetic process	35	13	37.1429	3.66	0.00955	down	SAT
exposure to 34°C	long-chain fatty acid import into cell	16	7	43.75	1.67	0.00066	down	SAT
exposure to 34°C	long-chain fatty acid import into cell	16	6	37.5	1.28	0.00104	down	BAT
exposure to 34°C	long-chain fatty acid biosynthetic process	11	4	36.3636	0.88	0.00857	down	BAT
exposure to 34°C	nucleotide transport	11	4	36.3636	0.88	0.00857	down	BAT
exposure to 34°C	pentose metabolic process	11	4	36.3636	0.88	0.00857	down	BAT
exposure to 34°C	regulation of phospholipid biosynthetic process	11	4	36.3636	0.88	0.00857	down	BAT
exposure to 34°C	secondary alcohol metabolic process	109	39	35.7798	11.4	0.00049	down	SAT
exposure to 34°C	inflammatory response to antigenic stimulus	42	15	35.7143	2.43	0.00053	down	ileum
exposure to 34°C	regulation of cellular respiration	28	10	35.7143	2.93	0.00034	down	SAT
exposure to 34°C	regulation of oxidative phosphorylation	28	10	35.7143	2.93	0.00023	down	SAT
exposure to 34°C	mitochondrial transmembrane transport	55	26	47.2727	5.75	6.0e-08	down	SAT
exposure to 34°C	mitochondrial transmembrane transport	56	13	23.2143	4.49	0.00077	down	BAT
exposure to 34°C	positive regulation of B cell differentiation	17	6	35.2941	0.98	0.00026	down	ileum
exposure to 34°C	regulation of granulocyte differentiation	17	6	35.2941	0.98	0.00033	down	ileum
exposure to 34°C	cellular modified amino acid catabolic process	17	6	35.2941	1.78	0.00579	down	SAT
exposure to 34°C	mitochondrial cytochrome c oxidase assembly	17	6	35.2941	1.78	0.00579	down	SAT
exposure to 34°C	muscle cell cellular homeostasis	17	6	35.2941	1.78	0.00579	down	SAT
exposure to 34°C	detoxification	43	15	34.8837	4.5	0.00761	down	SAT
exposure to 34°C	CD4-positive, alpha-beta T cell differentiation	69	24	34.7826	3.98	0.00527	down	ileum
exposure to 34°C	negative regulation of B cell activation	32	11	34.375	1.85	0.00079	down	ileum
exposure to 34°C	cholesterol metabolic process	101	34	33.6634	10.56	0.00161	down	SAT
exposure to 34°C	monosaccharide biosynthetic process	61	23	37.7049	6.38	0.00407	down	SAT
exposure to 34°C	monosaccharide biosynthetic process	61	8	13.1148	1.6	0.00386	down	VAT
exposure to 10°C	regulation of skeletal muscle contraction	10	2	20	0.12	0.00645	down	brain
exposure to 10°C	regulation of skeletal muscle contraction	13	5	38.4615	1.36	0.00778	down	SAT
exposure to 34°C	reflex	18	6	33.3333	1.44	0.00209	down	BAT
exposure to 34°C	chronic inflammatory response	12	4	33.3333	0.69	0.00376	down	ileum
exposure to 34°C	myeloid dendritic cell differentiation	15	5	33.3333	0.87	0.00117	down	ileum
exposure to 34°C	negative regulation of interleukin-6 secretion	12	4	33.3333	0.69	0.00376	down	ileum
exposure to 34°C	positive regulation of leukocyte adhesion to vascular endothelial cell	15	5	33.3333	0.87	0.00117	down	ileum
exposure to 34°C	positive regulation of podosome assembly	12	4	33.3333	0.69	0.00376	down	ileum
exposure to 34°C	regulation of antigen processing and presentation	18	6	33.3333	1.04	0.00037	down	ileum
exposure to 34°C	regulation of heterotypic cell-cell adhesion	15	5	33.3333	0.45	5.7e-05	down	Quadriceps
exposure to 34°C	glycogen biosynthetic process	39	13	33.3333	4.08	4.0e-06	down	SAT
exposure to 34°C	mitochondrial RNA metabolic process	34	11	32.3529	2.73	0.00571	down	BAT
exposure to 34°C	mitochondrion organization	387	124	32.0413	40.46	0.00192	down	SAT
exposure to 34°C	glycolytic process	66	21	31.8182	6.9	4.8e-05	down	SAT
exposure to 34°C	antibiotic metabolic process	70	22	31.4286	7.32	0.00014	down	SAT
exposure to 34°C	positive regulation of alpha-beta T cell activation	61	19	31.1475	3.52	0.00070	down	ileum
exposure to 34°C	humoral immune response mediated by circulating immunoglobulin	29	9	31.0345	1.67	1.3e-05	down	ileum
exposure to 34°C	negative regulation of leukocyte chemotaxis	13	4	30.7692	0.75	0.00518	down	ileum
exposure to 34°C	osteoclast development	13	4	30.7692	0.75	0.00518	down	ileum
exposure to 34°C	negative regulation of cellular catabolic process	203	19	9.35961	21.22	0.00575	down	SAT
exposure to 34°C	cofactor transport	23	7	30.4348	2.4	0.00731	down	SAT
exposure to 34°C	negative regulation of cellular catabolic process	202	14	6.93069	16.19	0.00659	down	BAT
exposure to 34°C	myosin filament assembly	10	3	30	0.12	0.00021	down	Brain
exposure to 34°C	negative regulation of interleukin-1 secretion	10	3	30	0.12	0.00021	down	Brain
exposure to 34°C	positive regulation of antigen receptor-mediated signaling pathway	20	6	30	1.15	0.00033	down	ileum
exposure to 34°C	regulation of heat generation	10	3	30	0.3	0.00279	down	Quadriceps
exposure to 34°C	regulation of synaptic transmission, dopaminergic	10	3	30	0.3	0.00279	down	Quadriceps
exposure to 34°C	vasodilation	27	8	29.6296	2.82	0.00504	down	SAT
exposure to 34°C	water-soluble vitamin metabolic process	27	8	29.6296	2.82	0.00504	down	SAT
exposure to 34°C	negative regulation of fatty acid oxidation	10	6	60	1.05	0.00019	down	SAT
exposure to 34°C	vitamin transport	17	5	29.4118	1.36	0.00897	down	BAT
exposure to 34°C	neutrophil homeostasis	17	5	29.4118	0.98	0.00219	down	ileum
exposure to 34°C	regulation of the force of heart contraction	24	7	29.1667	2.51	0.00941	down	SAT
exposure to 34°C	aspartate family amino acid metabolic process	31	9	29.0323	3.24	0.00332	down	SAT
exposure to 34°C	negative regulation of fatty acid oxidation	10	4	40	0.8	0.00582	down	BAT
exposure to 34°C	negative regulation of systemic arterial blood pressure	19	8	42.1053	1.99	0.00037	down	SAT
exposure to 34°C	establishment of skin barrier	14	4	28.5714	0.81	0.00693	down	ileum
exposure to 34°C	cellular aldehyde metabolic process	49	14	28.5714	5.12	0.00067	down	SAT
exposure to 34°C	regulation of cofactor metabolic process	25	7	28	2.61	0.00522	down	SAT
exposure to 34°C	cytolysis	18	5	27.7778	1.04	0.00289	down	ileum
exposure to 34°C	negative regulation of systemic arterial blood pressure	19	4	21.0526	0.5	0.00132	down	VAT
exposure to 34°C	peroxisomal membrane transport	16	8	50	1.67	0.00962	down	SAT
exposure to 34°C	peroxisomal membrane transport	17	8	47.0588	1.36	0.00449	down	BAT
exposure to 34°C	phosphatidylcholine biosynthetic process	17	7	41.1765	1.78	0.00102	down	SAT
exposure to 34°C	phosphatidylcholine biosynthetic process	17	3	17.6471	0.45	0.00924	down	VAT
exposure to 34°C	positive regulation of cold-induced thermogenesis	81	27	33.3333	8.47	2.2e-08	down	SAT
exposure to 34°C	positive regulation of cold-induced thermogenesis	81	18	22.2222	6.49	5.7e-05	down	BAT
exposure to 34°C	isotype switching	44	12	27.2727	2.54	0.00113	down	ileum
exposure to 34°C	detection of visible light	11	3	27.2727	0.32	0.0034	down	liver
exposure to 34°C	epithelial cell proliferation involved in lung morphogenesis	11	3	27.2727	0.33	0.00375	down	Quadriceps
exposure to 34°C	regulation of systemic arterial blood pressure mediated by a chemical signal	33	9	27.2727	3.45	0.00585	down	SAT
exposure to 34°C	high-density lipoprotein particle remodeling	11	3	27.2727	0.29	0.00252	down	VAT
exposure to 34°C	negative regulation of triglyceride metabolic process	11	3	27.2727	0.29	0.00252	down	VAT
exposure to 34°C	positive regulation of fatty acid oxidation	17	7	41.1765	1.36	0.00020	down	BAT
exposure to 34°C	B cell activation involved in immune response	70	19	27.1429	4.04	0.00321	down	ileum
exposure to 34°C	behavioral fear response	26	7	26.9231	2.08	0.00353	down	BAT
exposure to 34°C	positive regulation of phagocytosis, engulfment	15	4	26.6667	0.87	0.00902	down	ileum
exposure to 34°C	membrane biogenesis	38	10	26.3158	3.97	0.00319	down	SAT
exposure to 34°C	organic hydroxy compound catabolic process	38	10	26.3158	3.97	0.00319	down	SAT
exposure to 34°C	cellular response to interferon-beta	35	9	25.7143	2.81	0.00138	down	BAT
exposure to 34°C	positive regulation of fatty acid oxidation	17	6	35.2941	1.78	0.00579	down	SAT
exposure to 34°C	positive regulation of lipid biosynthetic process	76	22	28.9474	7.95	0.00213	down	SAT
exposure to 34°C	intestinal lipid absorption	12	3	25	0.15	0.00038	down	Brain
exposure to 34°C	piRNA metabolic process	12	3	25	0.15	0.00038	down	Brain
exposure to 34°C	MyD88-dependent toll-like receptor signaling pathway	20	5	25	1.15	0.00475	down	ileum
exposure to 34°C	positive regulation of macrophage activation	20	5	25	1.15	0.00475	down	ileum
exposure to 34°C	positive regulation of nitric-oxide synthase biosynthetic process	20	5	25	1.15	0.00475	down	ileum
exposure to 34°C	regulation of myeloid cell apoptotic process	28	7	25	1.62	0.00055	down	ileum
exposure to 34°C	chloride transmembrane transport	12	3	25	0.35	0.0044	down	liver
exposure to 34°C	negative regulation of gluconeogenesis	12	3	25	0.36	0.00488	down	Quadriceps
exposure to 34°C	regulation of norepinephrine secretion	12	3	25	0.36	0.00488	down	Quadriceps
exposure to 34°C	steroid biosynthetic process	106	26	24.5283	11.08	0.00192	down	SAT
exposure to 34°C	natural killer cell mediated cytotoxicity	49	12	24.4898	2.83	0.00170	down	ileum
exposure to 34°C	mast cell activation	54	13	24.0741	3.12	0.00548	down	ileum
exposure to 34°C	positive regulation of cardiac muscle cell proliferation	21	5	23.8095	0.63	0.00033	down	Quadriceps
exposure to 34°C	regulation of adaptive immune response	156	37	23.7179	9.01	0.00066	down	ileum
exposure to 34°C	positive regulation of lipid biosynthetic process	70	19	27.1429	5.61	0.00018	down	BAT
exposure to 34°C	positive regulation of nitric oxide biosynthetic process	37	7	18.9189	2.14	0.00468	down	ileum
exposure to 34°C	positive regulation of nitric oxide biosynthetic process	34	5	14.7059	1.03	0.00328	down	Quadriceps
exposure to 34°C	positive regulation of natural killer cell activation	26	6	23.0769	1.5	0.00689	down	ileum
exposure to 34°C	retinal rod cell differentiation	13	3	23.0769	0.39	0.00621	down	Quadriceps
exposure to 34°C	positive regulation of cation channel activity	52	12	23.0769	5.44	0.00636	down	SAT
exposure to 34°C	regulation of peroxisome proliferator activated receptor signaling pathway	13	3	23.0769	0.34	0.00420	down	VAT
exposure to 34°C	venous blood vessel development	13	3	23.0769	0.34	0.00420	down	VAT
exposure to 10°C	muscle contraction	220	46	20.9091	23	0.00015	down	SAT
exposure to 34°C	positive regulation of protein kinase activity	383	35	9.13838	22.11	0.00597	down	ileum
exposure to 34°C	positive regulation of protein kinase activity	328	17	5.18293	9.57	0.0031	down	liver
exposure to 34°C	regulation of icosanoid secretion	18	4	22.2222	1.04	0.00332	down	ileum
exposure to 34°C	regulation of leukocyte adhesion to vascular endothelial cell	18	4	22.2222	0.54	0.00011	down	Quadriceps
exposure to 34°C	cell redox homeostasis	54	12	22.2222	5.65	0.00870	down	SAT
exposure to 34°C	mitochondrial translation	64	14	21.875	6.69	0.00463	down	SAT
exposure to 34°C	protein homotetramerization	86	26	30.2326	8.99	3.6e-07	down	SAT
exposure to 34°C	positive regulation of dendrite extension	23	5	21.7391	1.33	0.00893	down	ileum
exposure to 34°C	protein homotetramerization	81	15	18.5185	6.49	0.00175	down	BAT
exposure to 34°C	heart contraction	163	35	21.4724	17.04	0.00934	down	SAT
exposure to 34°C	protein import into peroxisome matrix	11	5	45.4545	1.15	0.00334	down	SAT
exposure to 34°C	positive regulation of amine transport	28	6	21.4286	2.24	0.00101	down	BAT
exposure to 34°C	C4-dicarboxylate transport	14	3	21.4286	0.41	0.0071	down	liver
exposure to 34°C	neuron projection arborization	14	3	21.4286	0.41	0.0071	down	liver
exposure to 34°C	secondary palate development	14	3	21.4286	0.41	0.0071	down	liver
exposure to 34°C	negative regulation of behavior	14	3	21.4286	0.42	0.00773	down	Quadriceps
exposure to 34°C	protein oxidation	14	3	21.4286	0.42	0.00773	down	Quadriceps
exposure to 34°C	regulation of gonad development	14	3	21.4286	0.42	0.00773	down	Quadriceps
exposure to 34°C	regulation of respiratory gaseous exchange	14	3	21.4286	0.42	0.00521	down	Quadriceps
exposure to 34°C	white fat cell differentiation	14	3	21.4286	0.42	0.00773	down	Quadriceps
exposure to 34°C	regulation of lipoprotein particle clearance	14	3	21.4286	0.37	0.00524	down	VAT
exposure to 34°C	humoral immune response	103	22	21.3592	5.95	0.00488	down	ileum
exposure to 34°C	protein import into peroxisome matrix	12	5	41.6667	0.96	0.00161	down	BAT
exposure to 34°C	protein insertion into mitochondrial membrane	18	7	38.8889	1.88	0.00151	down	SAT
exposure to 34°C	positive regulation of behavior	19	4	21.0526	0.57	0.00220	down	Quadriceps
exposure to 34°C	protein insertion into mitochondrial membrane	18	7	38.8889	1.44	0.00030	down	BAT
exposure to 34°C	protein targeting to peroxisome	16	8	50	1.67	0.00962	down	SAT
exposure to 34°C	cellular response to amyloid-beta	29	6	20.6897	1.67	0.00550	down	ileum
exposure to 34°C	negative regulation of cytokine secretion	58	12	20.6897	3.35	0.00456	down	ileum
exposure to 34°C	activation of JUN kinase activity	34	7	20.5882	1.96	0.00284	down	ileum
exposure to 34°C	protein targeting to peroxisome	17	8	47.0588	1.36	0.00449	down	BAT
exposure to 34°C	maternal behavior	15	3	20	0.19	0.00076	down	Brain
exposure to 34°C	regulation of cholesterol esterification	10	2	20	0.12	0.00645	down	Brain
exposure to 34°C	reverse cholesterol transport	10	2	20	0.12	0.00645	down	Brain
exposure to 34°C	spinal cord association neuron differentiation	10	2	20	0.12	0.00645	down	Brain
exposure to 34°C	response to prostaglandin E	15	3	20	0.87	0.00960	down	ileum
exposure to 34°C	calcium-dependent cell-cell adhesion via plasma membrane cell adhesion molecules	20	4	20	0.58	0.0024	down	liver
exposure to 34°C	cellular response to fluid shear stress	15	3	20	0.45	0.00945	down	Quadriceps
exposure to 34°C	endothelial cell morphogenesis	15	3	20	0.45	0.00945	down	Quadriceps
exposure to 34°C	positive regulation of cation transmembrane transport	115	23	20	12.02	0.00576	down	SAT
exposure to 34°C	positive regulation of circadian rhythm	15	3	20	0.39	0.00643	down	VAT
exposure to 34°C	import across plasma membrane	93	18	19.3548	9.72	0.00766	down	SAT
exposure to 34°C	positive regulation of neurotransmitter transport	26	5	19.2308	0.78	0.00275	down	Quadriceps
exposure to 34°C	regulation of circadian sleep/wake cycle, sleep	11	3	27.2727	0.29	0.00252	down	VAT
exposure to 34°C	positive regulation of chemokine production	53	10	18.8679	3.06	0.00092	down	ileum
exposure to 34°C	regulation of circadian sleep/wake cycle, sleep	12	3	25	0.36	0.00488	down	Quadriceps
exposure to 34°C	porphyrin-containing compound metabolic process	32	6	18.75	2.57	0.00640	down	BAT
exposure to 34°C	regulation of fatty acid beta-oxidation	17	9	52.9412	1.36	1.8e-06	down	BAT
exposure to 34°C	carbohydrate derivative metabolic process	720	133	18.4722	75.28	0.00271	down	SAT
exposure to 34°C	carbohydrate derivative transport	49	9	18.3673	3.93	0.00551	down	BAT
exposure to 34°C	glucose homeostasis	192	35	18.2292	20.07	0.00090	down	SAT
exposure to 34°C	regulation of systemic arterial blood pressure by circulatory renin-angiotensin	11	2	18.1818	0.14	0.00781	down	Brain
exposure to 34°C	regulation of fatty acid beta-oxidation	17	6	35.2941	1.78	0.00579	down	SAT
exposure to 34°C	regulation of gastrulation	28	5	17.8571	0.84	0.00134	down	Quadriceps
exposure to 34°C	regulation of gastrulation	30	3	10	0.37	0.00595	down	Brain
exposure to 34°C	lung epithelium development	40	7	17.5	1.21	0.00050	down	Quadriceps
exposure to 34°C	defense response to bacterium	155	27	17.4194	8.95	0.00455	down	ileum
exposure to 10°C	muscle contraction	257	15	5.83658	3.19	0.00020	down	Brain
exposure to 34°C	reactive nitrogen species metabolic process	70	12	17.1429	7.32	0.00419	down	SAT
exposure to 34°C	calcineurin-NFAT signaling cascade	41	7	17.0732	2.37	0.00856	down	ileum
exposure to 34°C	cytokine production	623	106	17.0144	35.97	0.00492	down	ileum
exposure to 34°C	positive regulation of insulin secretion	59	10	16.9492	4.73	0.00377	down	BAT
exposure to 34°C	regulation of interleukin-8 biosynthetic process	12	4	33.3333	0.69	0.00376	down	ileum
exposure to 34°C	female mating behavior	12	2	16.6667	0.15	0.00930	down	Brain
exposure to 34°C	positive regulation of urine volume	12	2	16.6667	0.15	0.00930	down	Brain
exposure to 34°C	regulation of female gonad development	12	2	16.6667	0.15	0.00930	down	Brain
exposure to 34°C	regulation of excretion	18	3	16.6667	0.54	0.00521	down	Quadriceps
exposure to 34°C	reactive oxygen species metabolic process	231	38	16.4502	24.15	0.00764	down	SAT
exposure to 34°C	glycerophospholipid metabolic process	196	32	16.3265	20.49	0.00146	down	SAT
exposure to 34°C	cellular response to molecule of bacterial origin	166	27	16.2651	9.58	0.00816	down	ileum
exposure to 34°C	cellular amide metabolic process	809	131	16.1928	84.59	0.00045	down	SAT
exposure to 34°C	regulation of hair cycle	25	4	16	1.44	0.00863	down	ileum
exposure to 34°C	negative regulation of blood coagulation	32	5	15.625	0.84	0.00050	down	VAT
exposure to 34°C	regulation of cholesterol transport	33	5	15.1515	0.87	0.00946	down	VAT
exposure to 34°C	phagocytosis	172	26	15.1163	9.93	0.00584	down	ileum
exposure to 34°C	positive regulation of steroid metabolic process	27	4	14.8148	0.71	0.00034	down	VAT
exposure to 34°C	regulation of interleukin-8 biosynthetic process	11	3	27.2727	0.33	0.00375	down	Quadriceps
exposure to 34°C	negative regulation of ossification	62	9	14.5161	3.58	0.00686	down	ileum
exposure to 34°C	negative regulation of reproductive process	35	5	14.2857	1.06	0.00619	down	Quadriceps
exposure to 34°C	positive regulation of response to drug	28	4	14.2857	0.84	0.00939	down	Quadriceps
exposure to 34°C	response to oxidative stress	344	49	14.2442	35.97	0.00234	down	SAT
exposure to 34°C	cellular chemical homeostasis	569	80	14.0598	59.49	0.00187	down	SAT
exposure to 34°C	regulation of membrane potential	287	39	13.5889	30.01	0.00777	down	SAT
exposure to 34°C	chemotaxis	450	62	13.7778	25.98	0.00308	down	ileum
exposure to 34°C	cellular response to interferon-gamma	95	13	13.6842	5.49	0.00494	down	ileum
exposure to 34°C	cardiac myofibril assembly	22	3	13.6364	0.27	0.00243	down	Brain
exposure to 34°C	regulation of membrane potential	287	12	4.18118	7.52	0.00865	down	VAT
exposure to 34°C	regulation of renal system process	28	6	21.4286	2.93	0.00968	down	SAT
exposure to 34°C	phosphate-containing compound metabolic process	2310	309	13.3766	241.53	0.00070	down	SAT
exposure to 34°C	regulation of renal system process	29	4	13.7931	0.87	0.00026	down	Quadriceps
exposure to 34°C	collagen fibril organization	40	5	12.5	1.17	0.0058	down	liver
exposure to 34°C	anion homeostasis	42	5	11.9048	1.27	0.00372	down	Quadriceps
exposure to 34°C	feeding behavior	59	7	11.8644	1.78	0.00926	down	Quadriceps
exposure to 34°C	digestion	60	7	11.6667	1.75	0.0048	down	liver
exposure to 34°C	regulation of cellular amide metabolic process	314	35	11.1465	25.17	0.00363	down	BAT
exposure to 34°C	phospholipase C-activating G protein-coupled receptor signaling pathway	45	5	11.1111	1.36	0.00716	down	Quadriceps
exposure to 34°C	negative regulation of transforming growth factor beta receptor signaling pathway	54	6	11.1111	1.42	0.00278	down	VAT
exposure to 34°C	phospholipid catabolic process	36	4	11.1111	0.94	0.00773	down	VAT
exposure to 34°C	organic cyclic compound catabolic process	329	36	10.9422	34.4	4.1e-07	down	SAT
exposure to 34°C	demethylation	46	5	10.8696	3.69	0.00643	down	BAT
exposure to 34°C	phosphorylation	1734	186	10.7266	181.3	0.00394	down	SAT
exposure to 34°C	embryonic forelimb morphogenesis	28	3	10.7143	0.35	0.00489	down	Brain
exposure to 10°C	striated muscle contraction	125	28	22.4	13.07	0.00409	down	SAT
exposure to 34°C	aromatic compound catabolic process	310	32	10.3226	32.41	5.1e-05	down	SAT
exposure to 34°C	negative regulation of synaptic transmission	49	5	10.2041	1.48	0.00822	down	Quadriceps
exposure to 34°C	response to cold	30	10	33.3333	3.14	0.00064	down	SAT
exposure to 34°C	response to cold	30	7	23.3333	2.4	0.00825	down	BAT
exposure to 34°C	negative regulation of leukocyte cell-cell adhesion	92	9	9.78261	2.77	0.00022	down	Quadriceps
exposure to 34°C	negative regulation of lipid biosynthetic process	41	4	9.7561	1.2	0.0086	down	liver
exposure to 34°C	leukocyte cell-cell adhesion	226	22	9.73451	6.81	0.00078	down	Quadriceps
exposure to 34°C	sarcomere organization	47	13	27.6596	4.91	0.00079	down	SAT
exposure to 34°C	sarcomere organization	45	4	8.88889	0.56	0.00229	down	Brain
exposure to 34°C	divalent inorganic cation transport	319	29	9.09091	25.57	0.00640	down	BAT
exposure to 34°C	negative regulation of mitotic nuclear division	44	4	9.09091	1.33	0.00375	down	Quadriceps
exposure to 34°C	skeletal muscle thin filament assembly	11	7	63.6364	1.15	3.0e-05	down	SAT
exposure to 34°C	translation	502	44	8.76494	52.49	0.00175	down	SAT
exposure to 34°C	regulation of reactive oxygen species biosynthetic process	80	7	8.75	6.41	0.00052	down	BAT
exposure to 34°C	cellular response to fibroblast growth factor stimulus	70	6	8.57143	4.04	0.00521	down	ileum
exposure to 34°C	heterocycle catabolic process	304	26	8.55263	31.79	0.00982	down	SAT
exposure to 34°C	organic cyclic compound metabolic process	3932	324	8.24008	411.12	0.00792	down	SAT
exposure to 34°C	fat cell differentiation	208	17	8.17308	6.27	0.00053	down	Quadriceps
exposure to 34°C	fatty acid derivative metabolic process	88	7	7.95455	5.08	0.00960	down	ileum
exposure to 34°C	cardiac muscle tissue morphogenesis	65	5	7.69231	0.81	7.6e-05	down	Brain
exposure to 34°C	regulation of apoptotic process	1266	97	7.66193	73.1	0.00173	down	ileum
exposure to 34°C	positive regulation of synaptic transmission	134	10	7.46269	4.04	0.00700	down	Quadriceps
exposure to 34°C	cellular response to extracellular stimulus	191	14	7.32984	11.03	0.00094	down	ileum
exposure to 34°C	G protein-coupled receptor signaling pathway, coupled to cyclic nucleotide second messenger	83	6	7.22892	2.42	0.0048	down	liver
exposure to 34°C	positive regulation of cellular metabolic process	2520	180	7.14286	263.48	0.00203	down	SAT
exposure to 34°C	monosaccharide metabolic process	187	13	6.95187	5.64	0.00828	down	Quadriceps
exposure to 34°C	skeletal muscle thin filament assembly	11	3	27.2727	0.14	0.00029	down	Brain
exposure to 34°C	triglyceride biosynthetic process	31	16	51.6129	3.24	0.00036	down	SAT
exposure to 34°C	response to peptide hormone	274	17	6.20438	7.18	5.5e-05	down	VAT
exposure to 34°C	cell projection assembly	394	24	6.09137	22.75	0.00265	down	ileum
exposure to 34°C	response to glucose	133	8	6.01504	3.49	0.00116	down	VAT
exposure to 34°C	organelle fission	341	20	5.8651	27.34	0.00879	down	BAT
exposure to 34°C	triglyceride biosynthetic process	30	13	43.3333	2.4	0.00566	down	BAT
exposure to 34°C	amide transport	1648	95	5.76456	95.16	0.00872	down	ileum
exposure to 34°C	carbohydrate transport	110	6	5.45455	3.21	0.0074	down	liver
exposure to 34°C	phospholipid metabolic process	280	15	5.35714	8.44	0.00473	down	Quadriceps
exposure to 34°C	triglyceride metabolic process	75	34	45.3333	7.84	2.6e-05	down	SAT
exposure to 34°C	organophosphate catabolic process	99	5	5.05051	2.89	0.0049	down	liver
exposure to 34°C	response to organic cyclic compound	479	21	4.38413	14.44	0.00755	down	Quadriceps
exposure to 34°C	triglyceride metabolic process	75	16	21.3333	1.97	0.00207	down	VAT
exposure to 34°C	regulation of developmental growth	313	13	4.15335	8.21	0.00057	down	VAT
exposure to 34°C	protein localization to extracellular region	480	17	3.54167	12.59	0.00640	down	VAT
exposure to 34°C	internal protein amino acid acetylation	126	4	3.1746	13.17	0.00117	down	SAT
exposure to 34°C	positive regulation of cellular protein metabolic process	1171	32	2.73271	35.31	0.00880	down	Quadriceps
exposure to 34°C	morphogenesis of an epithelium	417	10	2.39808	12.57	0.00291	down	Quadriceps
exposure to 10°C	cell fate determination	26	5	19.2308	0.93	0.00204	up	ileum
exposure to 10°C	cell fate determination	18	4	22.2222	0.63	0.00310	up	liver
exposure to 10°C	cell fate determination	23	8	34.7826	0.9	1.6e-06	up	VAT
exposure to 10°C	cell fate determination	23	9	39.1304	3.5	0.00463	up	BAT
exposure to 10°C	cell fate determination	23	10	43.4783	4.3	0.00546	up	SAT
exposure to 10°C	adaptive immune response	329	88	26.7477	19	4.9e-14	down	ileum
exposure to 10°C	sensory perception of pain	86	8	9.30233	3.38	0.00564	up	VAT
exposure to 10°C	sensory perception of pain	66	7	10.6061	2.32	0.00356	up	liver
exposure to 10°C	sensory perception of pain	105	14	13.3333	3.76	0.00809	up	ileum
exposure to 10°C	sensory perception of pain	84	30	35.7143	12.78	6.3e-05	up	BAT
exposure to 10°C	adaptive immune response	281	20	7.11744	9.87	0.00093	up	liver
exposure to 10°C	adaptive immune response	328	40	12.1951	12.9	1.0e-14	up	VAT
exposure to 10°C	adaptive immune response	286	70	24.4755	43.53	0.00017	up	BAT
exposure to 10°C	adaptive immune response	328	168	51.2195	61.38	9.7e-24	up	SAT
exposure to 10°C	positive regulation of ERK1 and ERK2 cascade	138	12	8.69565	4.85	0.00337	up	liver
exposure to 10°C	positive regulation of ERK1 and ERK2 cascade	159	14	8.80503	6.25	0.00402	up	VAT
exposure to 10°C	positive regulation of ERK1 and ERK2 cascade	164	21	12.8049	9.47	0.00049	down	ileum
exposure to 10°C	positive regulation of ERK1 and ERK2 cascade	150	36	24	22.83	0.00302	up	BAT
exposure to 10°C	positive regulation of ERK1 and ERK2 cascade	159	48	30.1887	29.75	0.00030	up	SAT
exposure to 10°C	B cell activation	184	14	7.6087	6.46	0.00721	up	liver
exposure to 10°C	B cell activation	214	24	11.215	8.42	0.00946	up	VAT
exposure to 10°C	B cell activation	212	67	31.6038	12.24	1.7e-06	down	ileum
exposure to 10°C	B cell activation	214	109	50.9346	40.05	0.00029	up	SAT
exposure to 10°C	B cell receptor signaling pathway	47	12	25.5319	1.85	1.4e-05	up	VAT
exposure to 10°C	B cell receptor signaling pathway	43	18	41.8605	6.54	0.00603	up	BAT
exposure to 10°C	B cell receptor signaling pathway	46	25	54.3478	2.66	3.7e-13	down	ileum
exposure to 10°C	B cell receptor signaling pathway	47	34	72.3404	8.8	8.0e-12	up	SAT
exposure to 10°C	exogenous drug catabolic process	12	2	16.6667	0.08	0.00281	up	brain
exposure to 10°C	exogenous drug catabolic process	40	8	20	1.4	6.2e-05	up	liver
exposure to 10°C	exogenous drug catabolic process	24	8	33.3333	0.86	1.1e-06	up	ileum
exposure to 10°C	negative regulation of extrinsic apoptotic signaling pathway in absence of ligand	29	5	17.2414	1.14	0.00501	up	VAT
exposure to 10°C	negative regulation of extrinsic apoptotic signaling pathway in absence of ligand	25	10	40	3.8	0.00237	up	BAT
exposure to 10°C	negative regulation of extrinsic apoptotic signaling pathway in absence of ligand	29	12	41.3793	5.43	0.00392	up	SAT
exposure to 10°C	negative regulation of Notch signaling pathway	29	5	17.2414	1.14	0.00501	up	VAT
exposure to 10°C	negative regulation of Notch signaling pathway	29	10	34.4828	4.41	0.00815	up	BAT
exposure to 10°C	negative regulation of Notch signaling pathway	29	12	41.3793	5.43	0.00392	up	SAT
exposure to 10°C	negative regulation of transcription by RNA polymerase II	626	35	5.59105	21.98	0.00513	up	liver
exposure to 10°C	negative regulation of transcription by RNA polymerase II	698	48	6.87679	27.45	0.00025	up	VAT
exposure to 10°C	negative regulation of transcription by RNA polymerase II	698	157	22.4928	130.62	0.00280	up	SAT
exposure to 10°C	peripheral nervous system development	56	5	8.92857	2.2	0.00832	up	VAT
exposure to 10°C	peripheral nervous system development	53	14	26.4151	8.07	0.00888	up	BAT
exposure to 10°C	peripheral nervous system development	56	15	26.7857	10.48	0.00928	up	SAT
exposure to 10°C	xenobiotic metabolic process	69	11	15.942	2.47	0.00232	up	ileum
exposure to 10°C	xenobiotic metabolic process	89	17	19.1011	3.12	1.7e-08	up	liver
exposure to 10°C	xenobiotic metabolic process	51	14	27.451	7.76	0.00411	up	BAT
exposure to 10°C	G protein-coupled receptor signaling pathway	371	33	8.89488	14.59	4.4e-05	up	VAT
exposure to 10°C	G protein-coupled receptor signaling pathway	443	55	12.4153	25.58	4.5e-05	down	ileum
exposure to 10°C	G protein-coupled receptor signaling pathway	361	97	26.8698	54.94	5.7e-07	up	BAT
exposure to 10°C	G protein-coupled receptor signaling pathway	371	116	31.2668	69.43	4.6e-05	up	SAT
exposure to 10°C	neuropeptide signaling pathway	16	4	25	0.63	0.00295	up	VAT
exposure to 10°C	neuropeptide signaling pathway	16	8	50	2.44	0.00116	up	BAT
exposure to 10°C	positive regulation of cytosolic calcium ion concentration	195	16	8.20513	5.88	0.00119	down	QC
exposure to 10°C	positive regulation of cytosolic calcium ion concentration	223	25	11.2108	8.77	0.00045	up	VAT
exposure to 10°C	positive regulation of cytosolic calcium ion concentration	241	37	15.3527	13.92	0.00598	down	ileum
exposure to 10°C	positive regulation of cytosolic calcium ion concentration	210	59	28.0952	31.96	1.8e-05	up	BAT
exposure to 10°C	positive regulation of cytosolic calcium ion concentration	223	75	33.6323	41.73	0.00571	up	SAT
exposure to 10°C	positive regulation of phosphatidylinositol 3-kinase signaling	60	7	11.6667	2.36	0.00889	up	VAT
exposure to 10°C	positive regulation of phosphatidylinositol 3-kinase signaling	58	9	15.5172	3.35	0.00568	down	ileum
exposure to 10°C	positive regulation of phosphatidylinositol 3-kinase signaling	55	18	32.7273	8.37	0.00090	up	BAT
exposure to 10°C	positive regulation of phosphatidylinositol 3-kinase signaling	60	25	41.6667	11.23	3.2e-05	up	SAT
exposure to 10°C	positive regulation of T cell proliferation	65	8	12.3077	2.28	0.00626	up	liver
exposure to 10°C	positive regulation of T cell proliferation	70	21	30	10.65	0.00287	up	BAT
exposure to 10°C	positive regulation of T cell proliferation	81	28	34.5679	4.68	1.5e-10	down	ileum
exposure to 10°C	positive regulation of T cell proliferation	82	45	54.878	15.34	1.4e-06	up	SAT
exposure to 10°C	positive regulation of tyrosine phosphorylation of STAT protein	38	7	18.4211	1.49	0.00061	up	VAT
exposure to 10°C	positive regulation of tyrosine phosphorylation of STAT protein	38	11	28.9474	2.19	6.3e-06	down	ileum
exposure to 10°C	positive regulation of tyrosine phosphorylation of STAT protein	32	13	40.625	4.87	0.00045	up	BAT
exposure to 10°C	positive regulation of tyrosine phosphorylation of STAT protein	38	17	44.7368	7.11	0.00021	up	SAT
exposure to 10°C	regulation of B cell receptor signaling pathway	17	4	23.5294	0.67	0.00374	up	VAT
exposure to 10°C	regulation of B cell receptor signaling pathway	17	9	52.9412	0.98	1.1e-07	down	ileum
exposure to 10°C	regulation of B cell receptor signaling pathway	15	8	53.3333	2.28	0.00067	up	BAT
exposure to 10°C	regulation of B cell receptor signaling pathway	17	11	64.7059	3.18	3.9e-05	up	SAT
exposure to 10°C	response to bacterium	385	27	7.01299	13.52	5.0e-05	up	liver
exposure to 10°C	response to bacterium	471	72	15.2866	27.2	0.00298	down	ileum
exposure to 10°C	response to bacterium	392	108	27.551	59.66	1.1e-05	up	BAT
exposure to 10°C	T cell differentiation	237	29	12.2363	9.32	0.00435	up	VAT
exposure to 10°C	T cell differentiation	235	58	24.6809	13.57	0.00077	down	ileum
exposure to 10°C	T cell differentiation	212	57	26.8868	32.27	0.00424	up	BAT
exposure to 10°C	T cell differentiation	237	120	50.6329	44.35	2.5e-08	up	SAT
exposure to 10°C	immune response	891	16	1.79574	11.05	0.00430	down	brain
exposure to 10°C	immune response	1008	191	18.9484	58.2	9.6e-07	down	ileum
exposure to 10°C	innate immune response	482	71	14.7303	27.83	3.3e-08	down	ileum
exposure to 10°C	B cell differentiation	109	13	11.9266	4.29	0.00584	up	VAT
exposure to 10°C	B cell differentiation	109	34	31.1927	6.29	9.1e-07	down	ileum
exposure to 10°C	B cell differentiation	109	62	56.8807	20.4	9.5e-10	up	SAT
exposure to 10°C	positive regulation of smooth muscle contraction	23	4	17.3913	0.69	0.00457	down	Quadriceps
exposure to 10°C	negative regulation of muscle contraction	29	3	10.3448	0.36	0.00639	down	Brain
exposure to 34°C	cardiac muscle contraction	101	11	10.8911	3.97	0.00063	up	VAT
exposure to 34°C	cardiac muscle contraction	76	9	11.8421	2.67	0.00039	up	liver
exposure to 10°C	cytokine-mediated signaling pathway	262	30	11.4504	15.13	0.00186	down	ileum
exposure to 10°C	cytokine-mediated signaling pathway	245	64	26.1224	37.29	2.7e-06	up	BAT
exposure to 10°C	cytokine-mediated signaling pathway	265	72	27.1698	49.59	0.00201	up	SAT
exposure to 10°C	defense response to Gram-positive bacterium	71	16	22.5352	4.1	2.1e-06	down	ileum
exposure to 10°C	defense response to Gram-positive bacterium	52	15	28.8462	7.91	0.00883	up	BAT
exposure to 10°C	defense response to Gram-positive bacterium	59	24	40.678	11.04	7.3e-05	up	SAT
exposure to 10°C	defense response to virus	185	22	11.8919	10.68	0.00364	down	ileum
exposure to 10°C	defense response to virus	176	41	23.2955	26.79	0.00144	up	BAT
exposure to 10°C	defense response to virus	181	54	29.8343	33.87	0.00731	up	SAT
exposure to 10°C	dendritic cell differentiation	29	9	31.0345	1.67	0.00680	down	ileum
exposure to 10°C	dendritic cell differentiation	27	10	37.037	4.11	0.00018	up	BAT
exposure to 10°C	dendritic cell differentiation	33	17	51.5152	6.18	3.9e-05	up	SAT
exposure to 10°C	response to stimulus	5368	1002	18.6662	816.98	0.00186	up	BAT
exposure to 10°C	signal transduction	3508	843	24.0308	656.45	0.00329	up	SAT
exposure to 10°C	signal transduction	3382	694	20.5204	514.72	0.00226	up	BAT
exposure to 10°C	intracellular signal transduction	1971	479	24.3024	368.83	0.00035	up	SAT
exposure to 10°C	regulation of cell migration	730	187	25.6164	111.1	0.00231	up	BAT
exposure to 10°C	heterotypic cell-cell adhesion	45	11	24.4444	2.6	0.00039	down	ileum
exposure to 10°C	heterotypic cell-cell adhesion	41	13	31.7073	6.24	0.00461	up	BAT
exposure to 10°C	heterotypic cell-cell adhesion	45	23	51.1111	8.42	1.8e-05	up	SAT
exposure to 10°C	regulation of cell migration	759	185	24.3742	142.03	0.00097	up	SAT
exposure to 10°C	immunological synapse formation	14	7	50	0.81	5.0e-06	down	ileum
exposure to 10°C	immunological synapse formation	14	7	50	2.13	0.00239	up	BAT
exposure to 10°C	immunological synapse formation	15	10	66.6667	2.81	6.2e-05	up	SAT
exposure to 10°C	inflammatory response	445	34	7.64045	13.42	0.00637	down	QC
exposure to 10°C	inflammatory response	532	85	15.9774	30.72	8.1e-07	down	ileum
exposure to 10°C	inflammatory response	478	143	29.9163	72.75	4.5e-08	up	BAT
exposure to 10°C	inflammatory response	531	172	32.3917	99.37	6.5e-09	up	SAT
exposure to 10°C	T cell activation involved in immune response	75	20	26.6667	4.33	0.00204	down	ileum
exposure to 10°C	positive regulation of cell population proliferation	694	169	24.3516	105.62	0.00031	up	BAT
exposure to 10°C	negative regulation of cell population proliferation	545	142	26.055	101.99	0.00844	up	SAT
exposure to 10°C	leukocyte aggregation	12	5	41.6667	0.69	0.00036	down	ileum
exposure to 10°C	leukocyte aggregation	14	8	57.1429	2.13	0.00036	up	BAT
exposure to 10°C	leukocyte aggregation	14	9	64.2857	2.62	0.00022	up	SAT
exposure to 10°C	axon guidance	173	54	31.2139	32.37	0.00093	up	SAT
exposure to 10°C	negative regulation of cell population proliferation	527	134	25.4269	80.21	6.9e-06	up	BAT
exposure to 10°C	leukocyte tethering or rolling	25	8	32	1.44	5.3e-05	down	ileum
exposure to 10°C	leukocyte tethering or rolling	22	10	45.4545	3.35	0.00072	up	BAT
exposure to 10°C	leukocyte tethering or rolling	27	13	48.1481	5.05	0.00048	up	SAT
exposure to 10°C	long-chain fatty acid metabolic process	47	7	14.8936	1.42	0.00378	down	QC
exposure to 10°C	long-chain fatty acid metabolic process	77	15	19.4805	2.7	0.00170	up	liver
exposure to 10°C	long-chain fatty acid metabolic process	61	12	19.6721	2.19	0.00133	up	ileum
exposure to 10°C	long-chain fatty acid metabolic process	51	19	37.2549	4.09	3.7e-08	down	BAT
exposure to 10°C	long-chain fatty acid metabolic process	51	20	39.2157	5.33	6.8e-08	down	SAT
exposure to 10°C	lymph node development	28	10	35.7143	1.62	2.0e-06	down	ileum
exposure to 10°C	lymph node development	23	9	39.1304	3.5	0.00463	up	BAT
exposure to 10°C	lymph node development	27	18	66.6667	5.05	6.2e-08	up	SAT
exposure to 10°C	response to wounding	374	88	23.5294	69.99	0.00432	up	SAT
exposure to 10°C	response to wounding	353	88	24.9292	53.72	0.00205	up	BAT
exposure to 10°C	intracellular signal transduction	1752	87	4.96575	61.52	0.00571	up	liver
exposure to 10°C	regulation of ion transmembrane transport	327	83	25.3823	61.19	0.00433	up	SAT
exposure to 10°C	negative regulation of B cell proliferation	18	6	33.3333	1.04	0.00037	down	ileum
exposure to 10°C	negative regulation of B cell proliferation	16	9	56.25	2.44	0.00018	up	BAT
exposure to 10°C	negative regulation of B cell proliferation	17	10	58.8235	3.18	0.00028	up	SAT
exposure to 10°C	negative regulation of endopeptidase activity	119	11	9.2437	4.18	0.00047	up	liver
exposure to 10°C	negative regulation of endopeptidase activity	121	18	14.876	3.17	6.6e-13	down	VAT
exposure to 10°C	negative regulation of endopeptidase activity	100	23	23	15.22	0.00031	up	BAT
exposure to 10°C	immune response	993	82	8.2578	39.05	0.00666	up	VAT
exposure to 10°C	immune response	993	373	37.5629	185.82	2.8e-07	up	SAT
exposure to 10°C	calcium-mediated signaling	160	54	33.75	29.94	0.00852	up	SAT
exposure to 10°C	negative regulation of peptidyl-tyrosine phosphorylation	52	9	17.3077	3	0.00684	down	ileum
exposure to 10°C	negative regulation of peptidyl-tyrosine phosphorylation	49	11	22.449	7.46	0.00240	up	BAT
exposure to 10°C	negative regulation of peptidyl-tyrosine phosphorylation	51	14	27.451	9.54	0.00273	up	SAT
exposure to 10°C	negative regulation of T cell mediated immunity	15	4	26.6667	0.87	0.00902	down	ileum
exposure to 10°C	negative regulation of T cell mediated immunity	15	4	26.6667	0.59	0.00228	up	VAT
exposure to 10°C	negative regulation of T cell mediated immunity	15	10	66.6667	2.81	6.2e-05	up	SAT
exposure to 10°C	neutrophil chemotaxis	59	7	11.8644	1.78	0.00368	down	QC
exposure to 10°C	neutrophil chemotaxis	56	7	12.5	1.97	0.00105	up	liver
exposure to 10°C	neutrophil chemotaxis	71	16	22.5352	4.1	0.00062	down	ileum
exposure to 10°C	neutrophil chemotaxis	71	26	36.6197	10.81	0.00331	up	BAT
exposure to 10°C	positive regulation of acute inflammatory response	18	5	27.7778	0.54	0.00015	down	QC
exposure to 10°C	positive regulation of acute inflammatory response	27	8	29.6296	1.56	9.9e-05	down	ileum
exposure to 10°C	positive regulation of acute inflammatory response	24	11	45.8333	4.49	0.00151	up	SAT
exposure to 10°C	positive regulation of acute inflammatory response	21	10	47.619	3.2	0.00046	up	BAT
exposure to 10°C	positive regulation of alpha-beta T cell proliferation	18	4	22.2222	0.71	0.00466	up	VAT
exposure to 10°C	positive regulation of alpha-beta T cell proliferation	18	5	27.7778	1.04	0.00289	down	ileum
exposure to 10°C	positive regulation of alpha-beta T cell proliferation	18	12	66.6667	3.37	1.1e-05	up	SAT
exposure to 10°C	innate immune response	440	108	24.5455	66.97	2.9e-07	up	BAT
exposure to 10°C	innate immune response	478	148	30.9623	89.45	1.1e-06	up	SAT
exposure to 10°C	positive regulation of interferon-gamma production	49	17	34.6939	7.46	0.00059	up	BAT
exposure to 10°C	positive regulation of interferon-gamma production	62	22	35.4839	3.58	1.6e-09	down	ileum
exposure to 10°C	positive regulation of interferon-gamma production	60	37	61.6667	11.23	2.1e-12	up	SAT
exposure to 10°C	positive regulation of interleukin-12 production	31	12	38.7097	1.79	6.4e-08	down	ileum
exposure to 10°C	positive regulation of interleukin-12 production	28	11	39.2857	4.26	0.00172	up	BAT
exposure to 10°C	positive regulation of interleukin-12 production	30	17	56.6667	5.61	4.0e-06	up	SAT
exposure to 10°C	positive regulation of neutrophil chemotaxis	22	6	27.2727	1.27	0.00122	down	ileum
exposure to 10°C	positive regulation of neutrophil chemotaxis	22	9	40.9091	3.35	0.00325	up	BAT
exposure to 10°C	positive regulation of neutrophil chemotaxis	23	10	43.4783	4.3	0.00546	up	SAT
exposure to 10°C	positive regulation of NF-kappaB transcription factor activity	119	17	14.2857	6.87	0.00047	down	ileum
exposure to 10°C	positive regulation of NF-kappaB transcription factor activity	112	29	25.8929	17.05	0.00226	up	BAT
exposure to 10°C	positive regulation of NF-kappaB transcription factor activity	119	42	35.2941	22.27	1.3e-05	up	SAT
exposure to 10°C	positive regulation of peptidyl-tyrosine phosphorylation	154	19	12.3377	6.06	0.00285	up	VAT
exposure to 10°C	positive regulation of peptidyl-tyrosine phosphorylation	156	27	17.3077	9.01	0.00180	down	ileum
exposure to 10°C	positive regulation of peptidyl-tyrosine phosphorylation	154	60	38.961	28.82	2.3e-05	up	SAT
exposure to 10°C	positive regulation of T cell differentiation in thymus	13	5	38.4615	0.75	0.00055	down	ileum
exposure to 10°C	positive regulation of T cell differentiation in thymus	13	9	69.2308	2.43	9.5e-05	up	SAT
exposure to 10°C	positive regulation of T cell differentiation in thymus	10	7	70	1.52	0.00015	up	BAT
exposure to 10°C	cellular response to organonitrogen compound	420	78	18.5714	78.59	0.00403	up	SAT
exposure to 10°C	regulation of B cell proliferation	59	8	13.5593	2.32	0.00056	up	VAT
exposure to 10°C	cell chemotaxis	230	77	33.4783	43.04	0.00227	up	SAT
exposure to 10°C	regulation of B cell proliferation	61	23	37.7049	3.52	4.8e-05	down	ileum
exposure to 10°C	regulation of B cell proliferation	59	37	62.7119	11.04	0.00022	up	SAT
exposure to 10°C	cell adhesion	1015	76	7.48768	39.92	0.00612	up	VAT
exposure to 10°C	neuron death	322	73	22.6708	49.01	0.00289	up	BAT
exposure to 10°C	chemokine-mediated signaling pathway	42	15	35.7143	6.39	0.00086	up	BAT
exposure to 10°C	cellular response to organonitrogen compound	406	62	15.2709	61.79	0.00341	up	BAT
exposure to 10°C	positive regulation of cell population proliferation	735	58	7.89116	28.91	0.00804	up	VAT
exposure to 10°C	DNA replication checkpoint	13	8	61.5385	2.43	0.00078	up	SAT
exposure to 10°C	DNA replication checkpoint	12	6	50	1.83	0.00498	up	BAT
exposure to 10°C	negative regulation of cell adhesion	223	52	23.3184	33.94	0.00032	up	BAT
exposure to 10°C	response to stimulus	6085	50	0.821693	40.77	0.00899	up	brain
exposure to 10°C	DNA replication initiation	26	11	42.3077	4.87	0.00465	up	SAT
exposure to 10°C	DNA replication initiation	25	11	44	3.8	0.00055	up	BAT
exposure to 10°C	cell adhesion	1035	40	3.86473	37.11	0.00743	up	ileum
exposure to 10°C	microtubule-based movement	206	39	18.932	38.55	0.00205	up	SAT
exposure to 10°C	axon guidance	159	38	23.8994	24.2	0.00817	up	BAT
exposure to 10°C	mitotic sister chromatid segregation	127	38	29.9213	19.33	0.00015	up	BAT
exposure to 10°C	double-strand break repair via break-induced replication	11	6	54.5455	2.06	0.00831	up	SAT
exposure to 10°C	microtubule-based movement	196	36	18.3673	29.83	0.00034	up	BAT
exposure to 10°C	regulation of regulatory T cell differentiation	22	9	40.9091	1.27	1.7e-06	down	ileum
exposure to 10°C	regulation of regulatory T cell differentiation	21	9	42.8571	3.2	0.00222	up	BAT
exposure to 10°C	regulation of ion transmembrane transport	327	28	8.56269	12.86	7.8e-05	up	VAT
exposure to 10°C	double-strand break repair via break-induced replication	11	6	54.5455	1.67	0.00285	up	BAT
exposure to 10°C	regulation of regulatory T cell differentiation	22	11	50	4.12	0.00088	up	SAT
exposure to 10°C	calcium-mediated signaling	160	25	15.625	6.29	0.00065	up	VAT
exposure to 10°C	epoxygenase P450 pathway	24	8	33.3333	0.84	9.7e-07	up	liver
exposure to 10°C	anterior/posterior pattern specification	165	18	10.9091	6.49	0.00015	up	VAT
exposure to 10°C	neuron death	325	17	5.23077	12.78	0.00110	up	VAT
exposure to 10°C	cell chemotaxis	230	17	7.3913	9.05	0.00545	up	VAT
exposure to 10°C	homophilic cell adhesion via plasma membrane adhesion molecules	73	26	35.6164	13.66	0.00047	up	SAT
exposure to 10°C	kinetochore organization	18	11	61.1111	3.37	0.00023	up	SAT
exposure to 10°C	mitotic spindle assembly	50	15	30	7.61	0.00031	up	BAT
exposure to 10°C	leukocyte proliferation	265	138	52.0755	49.59	0.00368	up	SAT
exposure to 10°C	leukocyte proliferation	233	73	31.3305	35.46	0.00024	up	BAT
exposure to 10°C	male meiotic nuclear division	27	12	44.4444	5.05	0.00271	up	SAT
exposure to 10°C	learning	131	11	8.39695	4.7	0.00265	up	ileum
exposure to 10°C	mitotic sister chromatid segregation	130	48	36.9231	24.33	0.00015	up	SAT
exposure to 10°C	mitotic spindle assembly	50	19	38	9.36	3.7e-05	up	SAT
exposure to 10°C	mitotic spindle assembly checkpoint	33	15	45.4545	6.18	0.00053	up	SAT
exposure to 10°C	response to lipopolysaccharide	209	16	7.6555	8.22	0.00051	up	VAT
exposure to 10°C	response to lipopolysaccharide	222	33	14.8649	12.82	0.00956	down	ileum
exposure to 10°C	response to lipopolysaccharide	195	50	25.641	29.68	0.00353	up	BAT
exposure to 10°C	mitotic spindle assembly checkpoint	31	11	35.4839	4.72	0.00443	up	BAT
exposure to 10°C	negative regulation of cell adhesion	239	80	33.4728	44.72	0.00942	up	SAT
exposure to 10°C	learning	104	9	8.65385	4.09	0.00099	up	VAT
exposure to 10°C	negative regulation of lymphocyte migration	11	6	54.5455	2.06	0.00831	up	SAT
exposure to 10°C	anterior/posterior pattern specification	165	8	4.84848	2.05	0.00537	up	QC
exposure to 10°C	positive regulation of calcium-mediated signaling	42	8	19.0476	1.65	0.00020	up	VAT
exposure to 10°C	neutrophil degranulation	11	6	54.5455	2.06	0.00831	up	SAT
exposure to 10°C	neutrophil degranulation	10	6	60	1.52	0.00149	up	BAT
exposure to 10°C	positive regulation of alcohol biosynthetic process	18	8	44.4444	2.74	0.00297	up	BAT
exposure to 10°C	positive regulation of calcium-mediated signaling	42	17	40.4762	7.86	0.00048	up	SAT
exposure to 10°C	positive regulation of cytokine secretion	125	46	36.8	23.39	0.00025	up	SAT
exposure to 10°C	positive regulation of cytokine secretion	109	38	34.8624	16.59	0.00043	up	BAT
exposure to 10°C	skeletal muscle cell differentiation	65	5	7.69231	0.81	0.00125	down	brain
exposure to 10°C	skeletal muscle cell differentiation	43	7	16.2791	1.51	0.00089	up	liver
exposure to 10°C	skeletal muscle cell differentiation	53	10	18.8679	3.06	0.00024	down	ileum
exposure to 10°C	skeletal muscle cell differentiation	61	12	19.6721	2.4	3.4e-05	up	VAT
exposure to 10°C	positive regulation of interleukin-5 production	11	7	63.6364	1.67	0.00035	up	BAT
exposure to 10°C	chemokine-mediated signaling pathway	41	6	14.6341	1.61	0.00501	up	VAT
exposure to 10°C	neuron fate commitment	32	6	18.75	1.26	0.00821	up	VAT
exposure to 10°C	thymic T cell selection	23	6	26.087	0.9	0.00445	up	VAT
exposure to 10°C	positive regulation of interleukin-5 production	11	6	54.5455	2.06	0.00831	up	SAT
exposure to 10°C	positive thymic T cell selection	13	9	69.2308	2.43	9.5e-05	up	SAT
exposure to 10°C	positive thymic T cell selection	13	4	30.7692	0.51	0.00127	up	VAT
exposure to 10°C	T cell activation involved in immune response	70	21	30	10.65	0.00017	up	BAT
exposure to 10°C	protein localization to kinetochore	14	8	57.1429	2.62	0.00152	up	SAT
exposure to 10°C	protein localization to kinetochore	12	6	50	1.83	0.00498	up	BAT
exposure to 10°C	T cell activation involved in immune response	78	37	47.4359	14.6	0.00149	up	SAT
exposure to 10°C	regulation of attachment of spindle microtubules to kinetochore	12	8	66.6667	2.25	0.00036	up	SAT
exposure to 10°C	regulation of attachment of spindle microtubules to kinetochore	12	7	58.3333	1.83	0.00073	up	BAT
exposure to 34°C	skeletal muscle contraction	31	10	32.2581	1.22	2.9e-06	up	VAT
exposure to 10°C	T cell receptor signaling pathway	98	10	10.2041	3.85	0.00280	up	VAT
exposure to 34°C	skeletal muscle contraction	18	6	33.3333	0.63	2.3e-05	up	liver
exposure to 10°C	T cell receptor signaling pathway	100	21	21	5.77	4.4e-07	down	ileum
exposure to 10°C	glomerulus vasculature development	24	5	20.8333	0.94	0.00041	up	VAT
exposure to 10°C	T cell receptor signaling pathway	98	52	53.0612	18.34	9.2e-10	up	SAT
exposure to 10°C	kinetochore organization	17	5	29.4118	2.59	0.00235	up	BAT
exposure to 10°C	retinoic acid metabolic process	17	5	29.4118	0.61	0.00025	up	ileum
exposure to 10°C	homophilic cell adhesion via plasma membrane adhesion molecules	63	4	6.34921	0.78	0.00770	up	QC
exposure to 10°C	amine metabolic process	58	4	6.89655	2.04	0.00704	up	liver
exposure to 10°C	amine metabolic process	57	4	7.01754	2.24	0.00057	up	VAT
exposure to 10°C	neuron fate commitment	24	4	16.6667	0.84	0.00911	up	liver
exposure to 10°C	glomerulus vasculature development	22	4	18.1818	0.77	0.00307	up	liver
exposure to 10°C	middle ear morphogenesis	22	4	18.1818	0.87	0.00984	up	VAT
exposure to 10°C	middle ear morphogenesis	20	4	20	0.72	0.00500	up	ileum
exposure to 10°C	nitric oxide mediated signal transduction	20	4	20	0.72	0.00500	up	ileum
exposure to 10°C	regulation of cell fate commitment	18	4	22.2222	0.71	0.00291	up	VAT
exposure to 10°C	positive regulation of alcohol biosynthetic process	17	4	23.5294	0.6	0.00248	up	liver
exposure to 10°C	thymic T cell selection	23	16	69.5652	4.3	0.00647	up	SAT
exposure to 10°C	male meiotic nuclear division	19	3	15.7895	0.24	0.00514	up	QC
exposure to 10°C	nitric oxide mediated signal transduction	13	3	23.0769	0.46	0.00945	up	liver
exposure to 10°C	regulation of cell fate commitment	12	3	25	0.42	0.00746	up	liver
exposure to 10°C	retinoic acid metabolic process	12	3	25	0.15	0.00038	up	QC
exposure to 10°C	epoxygenase P450 pathway	11	3	27.2727	0.39	0.00609	up	ileum
exposure to 10°C	glomerulus morphogenesis	11	3	27.2727	0.43	0.00788	up	VAT
exposure to 10°C	negative regulation of lymphocyte migration	11	3	27.2727	0.43	0.00788	up	VAT
exposure to 10°C	glomerulus morphogenesis	10	3	30	0.35	0.00429	up	liver
exposure to 10°C	activated T cell proliferation	37	10	27.027	2.14	0.00846	down	ileum
exposure to 10°C	activated T cell proliferation	36	19	52.7778	6.74	0.00760	up	SAT
exposure to 10°C	acyl-CoA metabolic process	73	9	12.3288	2.56	0.00778	up	liver
exposure to 10°C	acyl-CoA metabolic process	64	33	51.5625	5.13	4.8e-05	down	BAT
exposure to 10°C	acyl-CoA metabolic process	67	39	58.209	7.01	5.8e-08	down	SAT
exposure to 10°C	immune response-regulating cell surface receptor signaling pathway	162	47	29.0123	9.35	0.00064	down	ileum
exposure to 10°C	adenylate cyclase-inhibiting G protein-coupled receptor signaling pathway	42	7	16.6667	2.43	0.00957	down	ileum
exposure to 10°C	adenylate cyclase-inhibiting G protein-coupled receptor signaling pathway	29	13	44.8276	5.43	0.00112	up	SAT
exposure to 10°C	antigen processing and presentation of exogenous peptide antigen via MHC class II	14	4	28.5714	0.81	0.00693	down	ileum
exposure to 10°C	antigen processing and presentation of exogenous peptide antigen via MHC class II	14	10	71.4286	2.62	2.5e-05	up	SAT
exposure to 10°C	antigen receptor-mediated signaling pathway	107	6	5.60748	3.76	0.00123	up	liver
exposure to 10°C	antigen receptor-mediated signaling pathway	134	42	31.3433	7.74	0.00305	down	ileum
exposure to 10°C	B cell homeostasis	36	11	30.5556	2.08	3.5e-06	down	ileum
exposure to 10°C	B cell homeostasis	36	19	52.7778	6.74	4.5e-06	up	SAT
exposure to 10°C	B cell proliferation	76	30	39.4737	4.39	7.5e-06	down	ileum
exposure to 10°C	B cell proliferation	77	47	61.039	14.41	0.00047	up	SAT
exposure to 10°C	brown fat cell differentiation	40	6	15	1.4	0.00221	up	liver
exposure to 10°C	brown fat cell differentiation	45	7	15.5556	1.36	0.00023	down	QC
exposure to 10°C	brown fat cell differentiation	47	12	25.5319	3.77	0.00067	down	BAT
exposure to 10°C	brown fat cell differentiation	47	17	36.1702	4.91	2.2e-08	down	SAT
exposure to 10°C	CD8-positive, alpha-beta T cell differentiation	12	6	50	0.69	2.5e-05	down	ileum
exposure to 10°C	CD8-positive, alpha-beta T cell differentiation	13	10	76.9231	2.43	8.5e-06	up	SAT
exposure to 10°C	cell fate specification	53	6	11.3208	1.6	0.00740	down	QC
exposure to 10°C	cell fate specification	52	8	15.3846	2.05	0.00659	up	VAT
exposure to 10°C	cell maturation	119	10	8.40336	3.59	0.00639	down	QC
exposure to 10°C	cell maturation	136	15	11.0294	7.85	0.00430	down	ileum
exposure to 10°C	cell maturation	128	38	29.6875	23.95	0.00018	up	SAT
exposure to 10°C	cell-cell signaling	1177	74	6.28717	46.29	0.00396	up	VAT
exposure to 10°C	cell-cell signaling	1302	87	6.68203	75.18	0.00733	down	ileum
exposure to 10°C	cellular response to lipopolysaccharide	158	24	15.1899	9.12	0.00063	down	ileum
exposure to 10°C	cellular response to lipopolysaccharide	149	48	32.2148	27.88	0.00135	up	SAT
exposure to 10°C	cholesterol homeostasis	77	9	11.6883	2.76	0.00168	up	ileum
exposure to 10°C	cholesterol homeostasis	67	9	13.4328	1.76	5.9e-05	down	VAT
exposure to 10°C	cholesterol homeostasis	67	15	22.3881	7.01	0.00332	down	SAT
exposure to 10°C	cortical actin cytoskeleton organization	37	7	18.9189	2.14	0.00468	down	ileum
exposure to 10°C	cortical actin cytoskeleton organization	37	14	37.8378	6.92	0.00500	up	SAT
exposure to 10°C	defense response to fungus	15	4	26.6667	0.87	0.00902	down	ileum
exposure to 10°C	defense response to fungus	14	7	50	2.13	0.00239	up	BAT
exposure to 10°C	defense response to protozoan	24	8	33.3333	1.92	0.00038	down	BAT
exposure to 10°C	defense response to protozoan	26	12	46.1538	1.5	5.8e-09	down	ileum
exposure to 10°C	defense response to protozoan	26	12	46.1538	4.87	0.00127	up	SAT
exposure to 10°C	drug catabolic process	89	18	20.2247	3.19	6.4e-05	up	ileum
exposure to 10°C	drug catabolic process	72	23	31.9444	7.53	0.00016	down	SAT
exposure to 10°C	eosinophil migration	13	3	23.0769	0.16	0.00049	down	brain
exposure to 10°C	eosinophil migration	17	11	64.7059	2.59	0.00349	up	BAT
exposure to 10°C	regulation of MAPK cascade	576	38	6.59722	22.65	0.00326	up	VAT
exposure to 10°C	morphogenesis of a branching structure	188	13	6.91489	7.39	0.00444	up	VAT
exposure to 10°C	gamma-delta T cell differentiation	13	6	46.1538	0.75	4.4e-05	down	ileum
exposure to 10°C	gamma-delta T cell differentiation	13	9	69.2308	2.43	9.5e-05	up	SAT
exposure to 10°C	regulation of chemotaxis	178	13	7.30337	7	0.00864	up	VAT
exposure to 10°C	ureteric bud morphogenesis	53	4	7.54717	2.08	0.00111	up	VAT
exposure to 10°C	angiogenesis	433	37	8.54503	17.03	0.00037	up	VAT
exposure to 10°C	hydrogen peroxide catabolic process	19	3	15.7895	0.13	0.00026	up	brain
exposure to 10°C	hydrogen peroxide catabolic process	16	6	37.5	1.67	0.00410	down	SAT
exposure to 10°C	negative regulation of cytokine production involved in immune response	19	7	36.8421	1.1	5.7e-05	down	ileum
exposure to 10°C	negative regulation of immune response	128	23	17.9688	7.39	0.00556	down	ileum
exposure to 10°C	positive regulation of humoral immune response	11	6	54.5455	0.64	1.3e-05	down	ileum
exposure to 10°C	positive regulation of immunoglobulin mediated immune response	33	10	30.303	1.91	0.00054	down	ileum
exposure to 10°C	positive regulation of T-helper 1 type immune response	20	6	30	1.15	0.00070	down	ileum
exposure to 10°C	regulation of T-helper 17 type immune response	17	5	29.4118	0.98	0.00175	down	ileum
exposure to 10°C	immunoglobulin secretion	21	8	38.0952	3.2	0.00618	up	BAT
exposure to 10°C	immunoglobulin secretion	23	9	39.1304	1.33	0.00330	down	ileum
exposure to 10°C	inflammatory cell apoptotic process	19	7	36.8421	1.1	5.7e-05	down	ileum
exposure to 10°C	inflammatory cell apoptotic process	18	9	50	3.37	0.00262	up	SAT
exposure to 10°C	integrin-mediated signaling pathway	81	11	13.5802	4.68	0.00665	down	ileum
exposure to 10°C	integrin-mediated signaling pathway	82	29	35.3659	15.34	2.0e-05	up	SAT
exposure to 10°C	interferon-gamma production	98	29	29.5918	5.66	0.00162	down	ileum
exposure to 10°C	interferon-gamma production	97	56	57.732	18.15	0.00108	up	SAT
exposure to 10°C	cardiocyte differentiation	153	14	9.15033	6.02	0.00857	up	VAT
exposure to 10°C	regulation of T cell differentiation	127	12	9.44882	4.99	0.00575	up	VAT
exposure to 10°C	regulation of epidermal cell differentiation	38	4	10.5263	1.49	0.00788	up	VAT
exposure to 10°C	Notch signaling pathway	142	15	10.5634	5.58	0.00795	up	VAT
exposure to 10°C	leukocyte chemotaxis	167	34	20.3593	9.64	7.9e-07	down	ileum
exposure to 10°C	leukocyte chemotaxis	167	59	35.3293	31.25	0.00737	up	SAT
exposure to 10°C	leukocyte migration involved in inflammatory response	14	4	28.5714	0.42	0.00064	down	QC
exposure to 10°C	leukocyte migration involved in inflammatory response	17	8	47.0588	2.59	0.00190	up	BAT
exposure to 10°C	lipoprotein transport	13	3	23.0769	0.34	0.00420	down	VAT
exposure to 10°C	lipoprotein transport	14	4	28.5714	0.5	0.00123	up	ileum
exposure to 10°C	inner ear morphogenesis	77	9	11.6883	3.03	0.00625	up	VAT
exposure to 10°C	mast cell degranulation	36	8	22.2222	2.08	0.00371	down	ileum
exposure to 10°C	mast cell degranulation	37	16	43.2432	6.92	0.00444	up	SAT
exposure to 10°C	mature B cell differentiation	27	8	29.6296	1.56	0.00033	down	ileum
exposure to 10°C	mature B cell differentiation	25	16	64	4.68	0.00025	up	SAT
exposure to 10°C	microglial cell activation	34	5	14.7059	1.03	0.00454	down	QC
exposure to 10°C	microglial cell activation	37	9	24.3243	2.14	0.00246	down	ileum
exposure to 10°C	microglial cell activation	35	14	40	5.33	0.00055	up	BAT
exposure to 10°C	lymphocyte migration	76	9	11.8421	2.99	0.00444	up	VAT
exposure to 10°C	metanephros development	64	8	12.5	2.52	0.00494	up	VAT
exposure to 10°C	synapse assembly	117	15	12.8205	4.6	0.00199	up	VAT
exposure to 10°C	thymus development	46	6	13.0435	1.81	0.00885	up	VAT
exposure to 10°C	T-helper cell differentiation	53	7	13.2075	2.08	0.00868	up	VAT
exposure to 10°C	heart valve development	52	7	13.4615	2.05	0.00109	up	VAT
exposure to 34°C	regulation of muscle contraction	116	16	13.7931	4.56	0.00024	up	VAT
exposure to 10°C	myeloid dendritic cell activation	25	9	36	1.44	0.00171	down	ileum
exposure to 10°C	myeloid dendritic cell activation	27	13	48.1481	5.05	0.00128	up	SAT
exposure to 10°C	myeloid leukocyte differentiation	182	25	13.7363	10.51	0.00538	down	ileum
exposure to 10°C	myeloid leukocyte differentiation	185	59	31.8919	34.62	0.00742	up	SAT
exposure to 10°C	natural killer cell differentiation	29	7	24.1379	1.67	0.00513	down	ileum
exposure to 10°C	natural killer cell differentiation	27	13	48.1481	5.05	0.00258	up	SAT
exposure to 10°C	negative regulation of antigen receptor-mediated signaling pathway	24	6	25	1.39	0.00033	down	ileum
exposure to 10°C	negative regulation of antigen receptor-mediated signaling pathway	24	15	62.5	4.49	0.00338	up	SAT
exposure to 10°C	neuron maturation	43	6	13.9535	1.69	0.00371	up	VAT
exposure to 10°C	cellular response to calcium ion	57	8	14.0351	2.24	0.00164	up	VAT
exposure to 10°C	SMAD protein signal transduction	57	8	14.0351	2.24	0.00383	up	VAT
exposure to 10°C	anterior/posterior axis specification	33	5	15.1515	1.3	0.00880	up	VAT
exposure to 10°C	negative regulation of cytokine biosynthetic process	23	4	17.3913	0.67	0.0041	down	liver
exposure to 10°C	negative regulation of cytokine biosynthetic process	23	6	26.087	1.33	0.00157	down	ileum
exposure to 10°C	negative regulation of cytokine biosynthetic process	25	13	52	4.68	0.00018	up	SAT
exposure to 10°C	outflow tract morphogenesis	71	11	15.493	2.79	0.00037	up	VAT
exposure to 10°C	neuronal action potential	22	4	18.1818	0.87	0.00984	up	VAT
exposure to 10°C	regulation of dopamine secretion	22	4	18.1818	0.87	0.00984	up	VAT
exposure to 10°C	negative regulation of inflammatory response	120	17	14.1667	6.93	0.00330	down	ileum
exposure to 10°C	negative regulation of inflammatory response	117	36	30.7692	21.89	0.00211	up	SAT
exposure to 10°C	negative regulation of interleukin-10 production	14	7	50	0.81	5.0e-06	down	ileum
exposure to 10°C	negative regulation of interleukin-10 production	15	8	53.3333	2.81	0.00272	up	SAT
exposure to 10°C	negative regulation of interleukin-12 production	18	6	33.3333	1.04	0.00037	down	ileum
exposure to 10°C	negative regulation of interleukin-12 production	18	10	55.5556	3.37	0.00052	up	SAT
exposure to 10°C	negative regulation of interleukin-17 production	13	5	38.4615	0.75	0.00055	down	ileum
exposure to 10°C	negative regulation of interleukin-17 production	13	7	53.8462	2.43	0.00474	up	SAT
exposure to 10°C	negative regulation of interleukin-6 production	42	16	38.0952	2.43	4.0e-08	down	ileum
exposure to 10°C	negative regulation of interleukin-6 production	42	22	52.381	7.86	3.9e-06	up	SAT
exposure to 10°C	negative regulation of leukocyte apoptotic process	47	10	21.2766	2.71	0.00159	down	ileum
exposure to 10°C	negative regulation of leukocyte apoptotic process	45	15	33.3333	6.85	0.00597	up	BAT
exposure to 10°C	positive regulation of myotube differentiation	31	6	19.3548	1.22	0.00292	up	VAT
exposure to 10°C	regulation of calcium ion-dependent exocytosis	31	6	19.3548	1.22	0.00566	up	VAT
exposure to 10°C	artery morphogenesis	63	13	20.6349	2.48	0.00943	up	VAT
exposure to 10°C	pericardium development	24	5	20.8333	0.94	0.00211	up	VAT
exposure to 10°C	negative regulation of T cell proliferation	55	12	21.8182	3.18	0.00016	down	ileum
exposure to 10°C	negative regulation of T cell proliferation	57	31	54.386	10.67	6.1e-09	up	SAT
exposure to 10°C	negative regulation of toll-like receptor signaling pathway	31	6	19.3548	1.79	0.00773	down	ileum
exposure to 10°C	negative regulation of toll-like receptor signaling pathway	30	13	43.3333	5.61	0.00165	up	SAT
exposure to 10°C	positive regulation of skeletal muscle tissue development	23	5	21.7391	0.9	0.00172	up	VAT
exposure to 10°C	negative regulation of calcium-mediated signaling	27	6	22.2222	1.06	0.00062	up	VAT
exposure to 10°C	response to ATP	27	6	22.2222	1.06	0.00020	up	VAT
exposure to 10°C	negative regulation of tumor necrosis factor production	49	4	8.16327	0.61	0.00314	down	brain
exposure to 10°C	negative regulation of tumor necrosis factor production	46	6	13.0435	1.39	0.00244	down	QC
exposure to 10°C	negative regulation of tumor necrosis factor production	51	14	27.451	2.94	7.1e-07	down	ileum
exposure to 10°C	negative regulation of tumor necrosis factor production	51	21	41.1765	9.54	0.00016	up	SAT
exposure to 10°C	negative thymic T cell selection	12	6	50	0.69	2.5e-05	down	ileum
exposure to 10°C	negative thymic T cell selection	12	9	75	2.25	3.5e-05	up	SAT
exposure to 10°C	vascular smooth muscle cell development	11	3	27.2727	0.43	0.00788	up	VAT
exposure to 10°C	aorta morphogenesis	29	8	27.5862	1.14	1.1e-05	up	VAT
exposure to 10°C	positive regulation of neurotransmitter secretion	18	5	27.7778	0.71	0.00052	up	VAT
exposure to 10°C	NK T cell differentiation	10	3	30	0.39	0.00590	up	VAT
exposure to 10°C	pharyngeal system development	22	7	31.8182	0.87	1.4e-05	up	VAT
exposure to 10°C	regulation of blood vessel endothelial cell proliferation involved in sprouting angiogenesis	10	4	40	0.39	0.00041	up	VAT
exposure to 10°C	regulation of secondary heart field cardioblast proliferation	10	4	40	0.39	0.00041	up	VAT
exposure to 10°C	T-helper 2 cell cytokine production	10	4	40	0.39	0.00041	up	VAT
exposure to 10°C	organic hydroxy compound transport	141	16	11.3475	4.25	0.00144	down	QC
exposure to 10°C	organic hydroxy compound transport	137	32	23.3577	20.85	0.00604	up	BAT
exposure to 10°C	otic vesicle development	10	3	30	0.3	0.00279	down	QC
exposure to 10°C	otic vesicle development	10	3	30	0.39	0.00590	up	VAT
exposure to 10°C	oxidation-reduction process	668	40	5.98802	17.51	1.3e-05	down	VAT
exposure to 10°C	oxidation-reduction process	697	43	6.1693	24.99	0.00028	up	ileum
exposure to 10°C	oxidation-reduction process	661	107	16.1876	52.99	0.00013	down	BAT
exposure to 10°C	oxidation-reduction process	668	272	40.7186	69.84	1.4e-30	down	SAT
exposure to 10°C	regulation of immune response	539	45	8.34879	21.2	0.00016	up	VAT
exposure to 10°C	natural killer cell activation involved in immune response	10	7	70	1.87	0.00056	up	SAT
exposure to 10°C	cellular response to transforming growth factor beta stimulus	178	29	16.2921	33.31	0.00767	up	SAT
exposure to 10°C	phagocytosis, engulfment	45	10	22.2222	2.6	0.00450	down	ileum
exposure to 10°C	phagocytosis, engulfment	41	14	34.1463	6.24	0.00235	up	BAT
exposure to 10°C	platelet aggregation	35	8	22.8571	2.02	0.00026	down	ileum
exposure to 10°C	platelet aggregation	37	19	51.3514	6.92	0.00016	up	SAT
exposure to 10°C	positive regulation of activated T cell proliferation	20	6	30	1.15	0.00070	down	ileum
exposure to 10°C	positive regulation of activated T cell proliferation	20	11	55	3.74	0.00030	up	SAT
exposure to 10°C	establishment of protein localization	1607	280	17.4238	300.72	0.00722	up	SAT
exposure to 10°C	regulation of humoral immune response mediated by circulating immunoglobulin	10	7	70	1.87	0.00056	up	SAT
exposure to 10°C	positive regulation of B cell proliferation	38	13	34.2105	2.19	1.0e-07	down	ileum
exposure to 10°C	positive regulation of B cell proliferation	37	22	59.4595	6.92	4.5e-08	up	SAT
exposure to 10°C	positive regulation of type 2 immune response	13	9	69.2308	2.43	9.5e-05	up	SAT
exposure to 10°C	cellular response to drug	276	59	21.3768	51.65	0.00343	up	SAT
exposure to 10°C	positive regulation of cAMP-mediated signaling	27	3	11.1111	0.33	0.00441	down	brain
exposure to 10°C	positive regulation of cAMP-mediated signaling	15	4	26.6667	0.54	0.00162	up	ileum
exposure to 10°C	positive regulation of CD4-positive, alpha-beta T cell differentiation	25	9	36	1.44	2.4e-07	down	ileum
exposure to 10°C	positive regulation of CD4-positive, alpha-beta T cell differentiation	25	15	60	4.68	0.00025	up	SAT
exposure to 10°C	positive regulation of cysteine-type endopeptidase activity	112	24	21.4286	20.96	0.00654	up	SAT
exposure to 10°C	positive regulation of neuron differentiation	357	79	22.1289	66.81	0.00728	up	SAT
exposure to 10°C	ventral spinal cord development	27	6	22.2222	5.05	0.00777	up	SAT
exposure to 10°C	cell-matrix adhesion	176	40	22.7273	32.93	0.00916	up	SAT
exposure to 10°C	positive regulation of cytosolic calcium ion concentration involved in phospholipase C-activating G protein-coupled signaling pathway	27	6	22.2222	1.56	0.00378	down	ileum
exposure to 10°C	positive regulation of cytosolic calcium ion concentration involved in phospholipase C-activating G protein-coupled signaling pathway	23	12	52.1739	4.3	0.00031	up	SAT
exposure to 10°C	positive regulation of GTPase activity	191	21	10.9948	11.03	0.00031	down	ileum
exposure to 10°C	positive regulation of GTPase activity	190	51	26.8421	35.55	0.00314	up	SAT
exposure to 10°C	immune response-regulating cell surface receptor signaling pathway	147	49	33.3333	22.37	0.00051	up	BAT
exposure to 10°C	negative regulation of cytokine production involved in immune response	19	4	21.0526	0.75	0.00572	up	VAT
exposure to 10°C	positive regulation of inflammatory response to antigenic stimulus	14	6	42.8571	0.81	7.3e-05	down	ileum
exposure to 10°C	positive regulation of inflammatory response to antigenic stimulus	15	7	46.6667	2.81	0.00519	up	SAT
exposure to 10°C	positive regulation of interleukin-10 production	26	3	11.5385	0.32	0.00395	down	brain
exposure to 10°C	positive regulation of interleukin-10 production	29	10	34.4828	1.67	2.8e-06	down	ileum
exposure to 10°C	positive regulation of interleukin-10 production	29	14	48.2759	5.43	0.00028	up	SAT
exposure to 10°C	positive regulation of interleukin-17 production	12	6	50	0.69	2.5e-05	down	ileum
exposure to 10°C	positive regulation of interleukin-17 production	11	8	72.7273	2.06	0.00014	up	SAT
exposure to 10°C	positive regulation of interleukin-2 biosynthetic process	11	4	36.3636	0.64	0.00262	down	ileum
exposure to 10°C	positive regulation of interleukin-2 biosynthetic process	12	7	58.3333	2.25	0.00261	up	SAT
exposure to 10°C	positive regulation of interleukin-4 production	21	6	28.5714	1.21	0.00093	down	ileum
exposure to 10°C	positive regulation of interleukin-4 production	22	15	68.1818	4.12	5.2e-07	up	SAT
exposure to 10°C	positive regulation of immune response to tumor cell	12	8	66.6667	2.25	0.00036	up	SAT
exposure to 10°C	mesenchymal cell development	68	16	23.5294	12.72	0.00520	up	SAT
exposure to 10°C	positive regulation of interleukin-6 biosynthetic process	15	4	26.6667	0.87	0.00902	down	ileum
exposure to 10°C	positive regulation of interleukin-6 biosynthetic process	14	7	50	2.62	0.00796	up	SAT
exposure to 10°C	positive regulation of interleukin-6 production	75	13	17.3333	4.33	0.00329	down	ileum
exposure to 10°C	positive regulation of interleukin-6 production	71	21	29.5775	10.81	0.00403	up	BAT
exposure to 10°C	positive regulation of interleukin-8 production	41	9	21.9512	2.37	0.00645	down	ileum
exposure to 10°C	positive regulation of interleukin-8 production	38	13	34.2105	5.78	0.00292	up	BAT
exposure to 10°C	positive regulation of leukocyte apoptotic process	31	8	25.8065	1.79	0.00022	down	ileum
exposure to 10°C	positive regulation of leukocyte apoptotic process	29	15	51.7241	5.43	0.00443	up	SAT
exposure to 10°C	positive regulation of lipid catabolic process	21	3	14.2857	0.26	0.00774	down	brain
exposure to 10°C	positive regulation of lipid catabolic process	23	5	21.7391	0.82	0.00114	up	ileum
exposure to 10°C	positive regulation of lipid catabolic process	20	6	30	0.52	8.8e-06	down	VAT
exposure to 10°C	positive regulation of lipid catabolic process	20	6	30	1.6	0.00380	down	BAT
exposure to 10°C	positive regulation of lipid catabolic process	20	9	45	2.09	8.4e-05	down	SAT
exposure to 10°C	positive regulation of mast cell activation	17	3	17.6471	0.51	0.00521	down	QC
exposure to 10°C	positive regulation of mast cell activation	23	10	43.4783	4.3	0.00341	up	SAT
exposure to 10°C	positive regulation of myeloid leukocyte differentiation	52	11	21.1538	3	0.00882	down	ileum
exposure to 10°C	positive regulation of myeloid leukocyte differentiation	54	18	33.3333	10.11	0.00452	up	SAT
exposure to 10°C	positive regulation of natural killer cell mediated cytotoxicity	25	8	32	1.44	5.3e-05	down	ileum
exposure to 10°C	positive regulation of natural killer cell mediated cytotoxicity	24	13	54.1667	4.49	0.00011	up	SAT
exposure to 10°C	positive regulation of Rho protein signal transduction	25	3	12	0.31	0.00353	down	brain
exposure to 10°C	positive regulation of Rho protein signal transduction	25	15	60	4.68	5.6e-06	up	SAT
exposure to 10°C	positive regulation of synapse assembly	42	6	14.2857	1.65	0.00565	up	VAT
exposure to 10°C	positive regulation of synapse assembly	44	9	20.4545	3.53	0.00724	down	BAT
exposure to 10°C	positive regulation of T cell differentiation	81	24	29.6296	4.68	0.00015	down	ileum
exposure to 10°C	positive regulation of T cell differentiation	82	44	53.6585	15.34	0.00040	up	SAT
exposure to 10°C	negative regulation of immune response	131	45	34.3511	24.51	0.00230	up	SAT
exposure to 10°C	positive regulation of humoral immune response	11	8	72.7273	2.06	0.00014	up	SAT
exposure to 10°C	positive regulation of toll-like receptor signaling pathway	24	6	25	1.39	0.00688	down	ileum
exposure to 10°C	positive regulation of toll-like receptor signaling pathway	24	10	41.6667	4.49	0.00794	up	SAT
exposure to 10°C	positive regulation of transcription by RNA polymerase II	1000	23	2.3	12.4	0.00406	down	brain
exposure to 10°C	positive regulation of transcription by RNA polymerase II	926	228	24.622	173.28	1.2e-06	up	SAT
exposure to 10°C	positive regulation of triglyceride metabolic process	23	6	26.087	0.82	5.2e-05	up	ileum
exposure to 10°C	positive regulation of triglyceride metabolic process	20	12	60	2.09	0.00012	down	SAT
exposure to 10°C	positive regulation of tumor necrosis factor biosynthetic process	19	2	10.5263	0.13	0.00705	up	brain
exposure to 10°C	positive regulation of tumor necrosis factor biosynthetic process	19	5	26.3158	1.1	0.00374	down	ileum
exposure to 10°C	transmembrane receptor protein tyrosine kinase signaling pathway	458	108	23.5808	85.71	0.00015	up	SAT
exposure to 10°C	potassium ion import across plasma membrane	28	4	14.2857	0.84	0.00939	down	QC
exposure to 10°C	potassium ion import across plasma membrane	32	7	21.875	1.26	0.00020	up	VAT
exposure to 10°C	protein kinase B signaling	145	7	4.82759	4.37	0.00723	down	QC
exposure to 10°C	protein kinase B signaling	133	10	7.5188	4.67	0.00126	up	liver
exposure to 10°C	gland morphogenesis	114	27	23.6842	21.33	0.00652	up	SAT
exposure to 10°C	stem cell differentiation	160	38	23.75	29.94	0.00978	up	SAT
exposure to 10°C	cell morphogenesis	854	205	24.0047	159.81	0.00757	up	SAT
exposure to 10°C	regulation of actin cytoskeleton organization	299	72	24.0803	55.95	0.00853	up	SAT
exposure to 10°C	regulation of B cell differentiation	31	12	38.7097	1.79	7.0e-05	down	ileum
exposure to 10°C	regulation of B cell differentiation	30	15	50	5.61	0.00150	up	SAT
exposure to 10°C	cellular response to carbohydrate stimulus	112	27	24.1071	20.96	0.00341	up	SAT
exposure to 10°C	peptidyl-serine phosphorylation	249	62	24.8996	46.6	0.00976	up	SAT
exposure to 10°C	cell surface receptor signaling pathway	1829	472	25.8065	342.26	8.4e-05	up	SAT
exposure to 10°C	cell division	495	131	26.4646	92.63	0.00526	up	SAT
exposure to 10°C	regulation of release of sequestered calcium ion into cytosol	64	18	28.125	11.98	0.00151	up	SAT
exposure to 10°C	microtubule bundle formation	58	17	29.3103	10.85	0.00277	up	SAT
exposure to 10°C	positive regulation of MAP kinase activity	182	54	29.6703	34.06	0.00659	up	SAT
exposure to 10°C	positive regulation of NIK/NF-kappaB signaling	64	19	29.6875	11.98	0.00918	up	SAT
exposure to 10°C	cellular response to virus	39	12	30.7692	7.3	0.00634	up	SAT
exposure to 10°C	regulation of cell shape	132	15	11.3636	7.62	0.00913	down	ileum
exposure to 10°C	positive regulation of I-kappaB kinase/NF-kappaB signaling	103	32	31.068	19.27	0.00170	up	SAT
exposure to 10°C	regulation of cell shape	128	32	25	19.48	0.00254	up	BAT
exposure to 10°C	calcium ion transport	294	95	32.3129	55.02	0.00045	up	SAT
exposure to 10°C	positive regulation of mitotic nuclear division	46	15	32.6087	8.61	0.00453	up	SAT
exposure to 10°C	positive regulation of immunoglobulin mediated immune response	34	15	44.1176	6.36	0.00150	up	SAT
exposure to 10°C	regulation of defense response to virus	63	7	11.1111	3.64	0.00064	down	ileum
exposure to 10°C	regulation of Ras protein signal transduction	205	67	32.6829	38.36	0.00245	up	SAT
exposure to 10°C	regulation of defense response to virus	62	21	33.871	11.6	0.00083	up	SAT
exposure to 10°C	regulation of immunoglobulin secretion	17	6	35.2941	0.98	0.00026	down	ileum
exposure to 10°C	regulation of immunoglobulin secretion	17	10	58.8235	3.18	0.00028	up	SAT
exposure to 10°C	regulation of calcium ion transmembrane transport	122	40	32.7869	22.83	0.00753	up	SAT
exposure to 10°C	oligodendrocyte differentiation	72	24	33.3333	13.47	0.00784	up	SAT
exposure to 10°C	regulation of interferon-gamma secretion	12	5	41.6667	0.69	0.00036	down	ileum
exposure to 10°C	kidney morphogenesis	74	25	33.7838	13.85	0.00441	up	SAT
exposure to 10°C	negative regulation of protein secretion	121	41	33.8843	22.64	0.00182	up	SAT
exposure to 10°C	chromosome organization involved in meiotic cell cycle	38	13	34.2105	7.11	0.00089	up	SAT
exposure to 10°C	negative regulation of epithelial cell differentiation	35	12	34.2857	6.55	0.00781	up	SAT
exposure to 10°C	regulation of cytokine production	563	194	34.4583	105.35	0.00286	up	SAT
exposure to 10°C	mature B cell differentiation involved in immune response	18	10	55.5556	3.37	0.00052	up	SAT
exposure to 10°C	mitotic DNA integrity checkpoint	56	20	35.7143	10.48	0.00764	up	SAT
exposure to 10°C	regulation of cell adhesion	588	211	35.8844	110.03	0.00189	up	SAT
exposure to 10°C	regulation of Rho protein signal transduction	119	43	36.1345	22.27	0.00087	up	SAT
exposure to 10°C	regulation of interferon-gamma secretion	12	7	58.3333	2.25	0.00261	up	SAT
exposure to 10°C	regulation of interleukin-2 biosynthetic process	13	3	23.0769	0.39	0.00621	down	QC
exposure to 10°C	positive regulation of JNK cascade	120	44	36.6667	22.46	0.00354	up	SAT
exposure to 10°C	negative regulation of CD4-positive, alpha-beta T cell differentiation	19	7	36.8421	3.56	0.00654	up	SAT
exposure to 10°C	microtubule depolymerization	43	16	37.2093	8.05	0.00470	up	SAT
exposure to 10°C	positive regulation of leukocyte migration	123	46	37.3984	23.02	0.00259	up	SAT
exposure to 10°C	negative regulation of animal organ morphogenesis	32	12	37.5	5.99	0.00985	up	SAT
exposure to 10°C	positive regulation of JUN kinase activity	69	26	37.6812	12.91	0.00118	up	SAT
exposure to 10°C	filopodium assembly	50	19	38	9.36	0.00035	up	SAT
exposure to 10°C	homeostasis of number of cells within a tissue	36	14	38.8889	6.74	0.00374	up	SAT
exposure to 10°C	regulation of interleukin-2 biosynthetic process	16	6	37.5	2.44	0.00235	up	BAT
exposure to 10°C	cell differentiation involved in embryonic placenta development	25	10	40	4.68	0.00829	up	SAT
exposure to 10°C	lymphoid progenitor cell differentiation	20	8	40	3.74	0.00772	up	SAT
exposure to 10°C	positive regulation of cell cycle arrest	30	12	40	5.61	0.00544	up	SAT
exposure to 10°C	phosphatidylinositol 3-kinase signaling	107	43	40.1869	20.02	0.00438	up	SAT
exposure to 10°C	meiotic chromosome segregation	57	23	40.3509	10.67	4.6e-05	up	SAT
exposure to 10°C	positive regulation of adaptive immune response based on somatic recombination of immune receptors built from immunoglobulin superfamily domains	95	48	50.5263	17.78	0.00019	up	SAT
exposure to 10°C	motor neuron axon guidance	27	11	40.7407	5.05	0.00653	up	SAT
exposure to 10°C	positive regulation of cytokine production involved in immune response	49	22	44.898	9.17	0.00076	up	SAT
exposure to 10°C	regulation of bone resorption	38	16	42.1053	7.11	0.00787	up	SAT
exposure to 10°C	bone trabecula morphogenesis	14	6	42.8571	2.62	0.00122	up	SAT
exposure to 10°C	heterophilic cell-cell adhesion via plasma membrane cell adhesion molecules	35	15	42.8571	6.55	0.00085	up	SAT
exposure to 10°C	T-helper 2 cell differentiation	14	6	42.8571	2.62	0.00654	up	SAT
exposure to 10°C	cell surface receptor signaling pathway involved in heart development	23	10	43.4783	4.3	0.00546	up	SAT
exposure to 10°C	negative regulation of T cell differentiation	39	17	43.5897	7.3	0.00155	up	SAT
exposure to 10°C	regulation of lipoprotein lipase activity	14	3	21.4286	0.41	0.0071	down	liver
exposure to 10°C	regulation of lipoprotein lipase activity	12	3	25	0.43	0.00791	up	ileum
exposure to 10°C	positive regulation of cytokinesis	25	11	44	4.68	0.00322	up	SAT
exposure to 10°C	regulation of lipoprotein lipase activity	11	3	27.2727	0.29	0.00252	down	VAT
exposure to 10°C	immunoglobulin mediated immune response	95	39	41.0526	17.78	0.00034	up	SAT
exposure to 10°C	positive regulation of cell adhesion mediated by integrin	20	9	45	3.74	0.00633	up	SAT
exposure to 10°C	positive regulation of defense response to virus by host	22	10	45.4545	4.12	0.00370	up	SAT
exposure to 10°C	regulation of lipoprotein lipase activity	11	4	36.3636	0.88	0.00857	down	BAT
exposure to 10°C	regulation of lipoprotein lipase activity	11	6	54.5455	1.15	0.00038	down	SAT
exposure to 10°C	positive regulation of T cell mediated cytotoxicity	22	10	45.4545	4.12	0.00370	up	SAT
exposure to 10°C	negative regulation of interleukin-2 production	24	11	45.8333	4.49	0.00216	up	SAT
exposure to 10°C	positive regulation of excitatory postsynaptic potential	24	11	45.8333	4.49	0.00216	up	SAT
exposure to 10°C	replication fork processing	26	12	46.1538	4.87	0.00127	up	SAT
exposure to 10°C	regulation of postsynaptic membrane organization	17	8	47.0588	3.18	0.00721	up	SAT
exposure to 10°C	type B pancreatic cell development	17	8	47.0588	3.18	0.00721	up	SAT
exposure to 10°C	negative regulation of interferon-gamma production	25	12	48	4.68	0.00082	up	SAT
exposure to 34°C	regulation of skeletal muscle contraction	10	4	40	0.36	0.00029	up	ileum
exposure to 10°C	T cell proliferation	175	87	49.7143	32.75	0.00669	up	SAT
exposure to 10°C	glycosphingolipid biosynthetic process	14	7	50	2.62	0.00796	up	SAT
exposure to 10°C	neutrophil activation	26	13	50	4.87	0.00445	up	SAT
exposure to 10°C	peptidyl-tyrosine autophosphorylation	38	19	50	7.11	1.3e-05	up	SAT
exposure to 10°C	positive regulation of immunoglobulin production	36	18	50	6.74	1.6e-05	up	SAT
exposure to 10°C	positive regulation of T-helper cell differentiation	18	9	50	3.37	0.00262	up	SAT
exposure to 34°C	phasic smooth muscle contraction	12	6	50	1.83	0.00498	up	BAT
exposure to 10°C	regulation of thymocyte apoptotic process	16	8	50	2.99	0.00456	up	SAT
exposure to 10°C	cardiac muscle contraction	101	11	10.8911	3.97	0.00063	up	VAT
exposure to 10°C	regulation of T cell tolerance induction	11	4	36.3636	0.64	0.00262	down	ileum
exposure to 10°C	V(D)J recombination	14	7	50	2.62	0.00796	up	SAT
exposure to 10°C	regulation of T cell tolerance induction	10	7	70	1.87	0.00056	up	SAT
exposure to 10°C	positive regulation of T-helper 1 type immune response	20	10	50	3.74	0.00152	up	SAT
exposure to 10°C	immunoglobulin production involved in immunoglobulin mediated immune response	54	22	40.7407	10.11	0.00441	up	SAT
exposure to 10°C	regulation of tolerance induction	17	7	41.1765	0.98	0.00332	down	ileum
exposure to 10°C	labyrinthine layer morphogenesis	21	11	52.381	3.93	0.00826	up	SAT
exposure to 10°C	Sertoli cell development	19	10	52.6316	3.56	0.00091	up	SAT
exposure to 10°C	positive regulation of T cell cytokine production	17	9	52.9412	3.18	0.00157	up	SAT
exposure to 10°C	regulation of tolerance induction	14	8	57.1429	2.13	0.00036	up	BAT
exposure to 10°C	regulation of T-helper 17 type immune response	17	9	52.9412	3.18	0.00518	up	SAT
exposure to 10°C	central nervous system myelination	15	8	53.3333	2.81	0.00272	up	SAT
exposure to 10°C	mitotic chromosome condensation	15	8	53.3333	2.81	0.00272	up	SAT
exposure to 10°C	negative regulation of bone mineralization	15	8	53.3333	2.81	0.00272	up	SAT
exposure to 10°C	response to cytokine	664	25	3.76506	17.41	1.3e-05	down	VAT
exposure to 10°C	regulation of CD8-positive, alpha-beta T cell activation	15	8	53.3333	2.81	0.00272	up	SAT
exposure to 10°C	positive regulation of astrocyte differentiation	13	7	53.8462	2.43	0.00474	up	SAT
exposure to 10°C	positive regulation of T cell receptor signaling pathway	13	7	53.8462	2.43	0.00474	up	SAT
exposure to 10°C	somatic hypermutation of immunoglobulin genes	13	7	53.8462	2.43	0.00474	up	SAT
exposure to 10°C	cellular defense response	11	6	54.5455	2.06	0.00831	up	SAT
exposure to 10°C	keratinization	11	6	54.5455	2.06	0.00831	up	SAT
exposure to 10°C	response to cytokine	625	134	21.44	95.12	0.00267	up	BAT
exposure to 10°C	negative regulation of B cell apoptotic process	11	6	54.5455	2.06	0.00831	up	SAT
exposure to 10°C	positive regulation of antigen processing and presentation	11	6	54.5455	2.06	0.00831	up	SAT
exposure to 10°C	response to fatty acid	37	6	16.2162	1.3	0.00040	up	liver
exposure to 10°C	positive regulation of heterotypic cell-cell adhesion	11	6	54.5455	2.06	0.00831	up	SAT
exposure to 10°C	response to fatty acid	39	7	17.9487	1.18	8.9e-05	down	QC
exposure to 10°C	positive regulation of interleukin-8 biosynthetic process	11	6	54.5455	2.06	0.00831	up	SAT
exposure to 10°C	positive regulation of protein polyubiquitination	11	6	54.5455	2.06	0.00831	up	SAT
exposure to 10°C	response to fatty acid	44	11	25	3.53	0.00367	down	BAT
exposure to 10°C	vitamin D metabolic process	11	6	54.5455	2.06	0.00831	up	SAT
exposure to 10°C	CD4-positive, alpha-beta T cell cytokine production	18	10	55.5556	3.37	0.00084	up	SAT
exposure to 10°C	positive regulation of alpha-beta T cell differentiation	43	24	55.814	8.05	0.00254	up	SAT
exposure to 10°C	negative regulation of T cell apoptotic process	21	12	57.1429	3.93	9.8e-05	up	SAT
exposure to 10°C	positive regulation of interleukin-13 production	12	7	58.3333	2.25	0.00261	up	SAT
exposure to 10°C	negative regulation of T cell receptor signaling pathway	17	10	58.8235	3.18	0.00028	up	SAT
exposure to 10°C	antigen processing and presentation of endogenous peptide antigen via MHC class I via ER pathway	10	6	60	1.87	0.00449	up	SAT
exposure to 10°C	antigen processing and presentation of endogenous peptide antigen via MHC class Ib	10	6	60	1.87	0.00449	up	SAT
exposure to 10°C	Peyer's patch development	10	6	60	1.87	0.00449	up	SAT
exposure to 10°C	positive regulation of killing of cells of other organism	10	6	60	1.87	0.00449	up	SAT
exposure to 10°C	regulation of fever generation	10	6	60	1.87	0.00449	up	SAT
exposure to 10°C	regulation of toll-like receptor 2 signaling pathway	10	6	60	1.87	0.00449	up	SAT
exposure to 10°C	signal transduction involved in mitotic G1 DNA damage checkpoint	10	6	60	1.87	0.00449	up	SAT
exposure to 10°C	positive regulation of CREB transcription factor activity	16	10	62.5	2.99	0.00014	up	SAT
exposure to 10°C	negative regulation of bone remodeling	11	7	63.6364	2.06	0.00129	up	SAT
exposure to 10°C	negative regulation of hormone biosynthetic process	11	7	63.6364	2.06	0.00129	up	SAT
exposure to 10°C	neurotransmitter-gated ion channel clustering	11	7	63.6364	2.06	0.00129	up	SAT
exposure to 10°C	positive regulation of monocyte chemotactic protein-1 production	11	7	63.6364	2.06	0.00129	up	SAT
exposure to 10°C	detection of mechanical stimulus involved in sensory perception of pain	12	8	66.6667	2.25	0.00036	up	SAT
exposure to 10°C	regulation of cell-cell adhesion mediated by integrin	12	8	66.6667	2.25	0.00036	up	SAT
exposure to 10°C	tolerance induction	25	17	68	4.68	0.00114	up	SAT
exposure to 10°C	retrograde trans-synaptic signaling	12	4	33.3333	0.43	0.00064	up	ileum
exposure to 10°C	retrograde trans-synaptic signaling	10	4	40	0.8	0.00582	down	BAT
exposure to 10°C	thrombin-activated receptor signaling pathway	10	7	70	1.87	0.00056	up	SAT
exposure to 10°C	detection of bacterium	14	10	71.4286	2.62	2.5e-05	up	SAT
exposure to 10°C	neuron development	896	17	1.89732	11.12	0.01000	up	QC
exposure to 10°C	embryonic skeletal system morphogenesis	84	5	5.95238	1.04	0.00387	up	QC
exposure to 10°C	hindlimb morphogenesis	33	3	9.09091	0.41	0.00778	up	QC
exposure to 10°C	photoreceptor cell maintenance	28	4	14.2857	0.35	0.00037	up	QC
exposure to 10°C	detection of light stimulus	20	3	15	0.25	0.00403	up	QC
exposure to 10°C	proximal/distal pattern formation	24	4	16.6667	0.3	0.00020	up	QC
exposure to 10°C	negative regulation of long-term synaptic potentiation	11	2	18.1818	0.14	0.00782	up	QC
exposure to 10°C	short-chain fatty acid metabolic process	12	3	25	0.36	0.00488	down	QC
exposure to 10°C	short-chain fatty acid metabolic process	12	3	25	0.42	0.00746	up	liver
exposure to 10°C	response to auditory stimulus	15	4	26.6667	0.19	2.8e-05	up	QC
exposure to 10°C	immune response to tumor cell	10	2	20	0.12	0.00645	up	QC
exposure to 10°C	lymphocyte differentiation	262	18	6.87023	9.2	0.00119	up	liver
exposure to 10°C	cellular response to tumor necrosis factor	100	8	8	3.51	0.00936	up	liver
exposure to 10°C	short-chain fatty acid metabolic process	12	6	50	0.96	0.00016	down	BAT
exposure to 10°C	short-chain fatty acid metabolic process	12	9	75	1.25	2.4e-07	down	SAT
exposure to 10°C	regulation of ATPase activity	50	4	8	1.76	0.00703	up	liver
exposure to 10°C	sterol metabolic process	112	11	9.82143	3.93	0.00686	up	liver
exposure to 10°C	cellular response to hypoxia	76	9	11.8421	2.67	0.00123	up	liver
exposure to 10°C	actin-mediated cell contraction	52	7	13.4615	1.83	0.00112	up	liver
exposure to 10°C	dorsal/ventral pattern formation	58	8	13.7931	2.04	0.00544	up	liver
exposure to 10°C	protein localization to cilium	41	6	14.6341	1.44	0.00413	up	liver
exposure to 10°C	positive regulation of monooxygenase activity	19	3	15.7895	0.67	0.00702	up	liver
[truncated: 617 more rows]
