# Supplementary material for: Comparative multi-tissue profiling reveals extensive tissue-specificity in transcriptome reprogramming during thermal adaptation
Source: eLife. 2022 May 17;11:e78556. doi: 10.7554/eLife.78556 (PMC9113744; doi:10.7554/eLife.78556)
Supplement: Supplementary file 8. [file elife-78556-supp8.xlsx]

## Sheet: Suplementary File 8
common term	#of tissues warm_up	#of tissues warm_down	#of tissues cold_up	#of tissues cold_down
skeletal muscle contraction	2	0	0	3		Up in warm, down in Cold
regulation of adenylate cyclase activity	1	0	0	3		Up in warm, up in Cold
homophilic cell adhesion via plasma membrane adhesion molecules	2	0	0	2
negative regulation of cell population proliferation	2	0	0	2
regulation of MAPK cascade	1	0	0	2
locomotory behavior	1	0	0	2
outflow tract morphogenesis	1	0	0	2
positive regulation of steroid biosynthetic process	1	0	0	2
regulation of blood vessel endothelial cell proliferation involved in sprouting angiogenesis	1	0	0	2
intracellular signal transduction	2	0	0	1
learning	2	0	0	1
regulation of ion transmembrane transport	2	0	0	1
middle ear morphogenesis	2	0	0	1
nitric oxide mediated signal transduction	2	0	0	1
negative regulation of cell adhesion	2	0	0	1
response to wounding	2	0	0	1
leukocyte proliferation	2	0	0	1
angiogenesis	1	0	0	1
memory	1	0	0	1
lipid transport	1	0	0	1
inner ear morphogenesis	1	0	0	1
positive regulation of endothelial cell chemotaxis	1	0	0	1
metanephros development	1	0	0	1
actin-mediated cell contraction	1	0	0	1
regulation of muscle contraction	1	0	0	1
cellular response to calcium ion	1	0	0	1
response to hormone	1	0	0	1
regulation of actin filament-based movement	1	0	0	1
positive regulation of gene expression	1	0	0	1
proximal/distal pattern formation	1	0	0	1
axon regeneration	1	0	0	1
fat-soluble vitamin metabolic process	1	0	0	1
neuronal action potential	1	0	0	1
positive regulation of neuron differentiation	1	0	0	1
epithelial cell differentiation	1	0	0	1
cell-matrix adhesion	1	0	0	1
embryonic digestive tract morphogenesis	1	0	0	1
monocarboxylic acid transport	1	0	0	1
positive regulation of epithelial cell proliferation	1	0	0	1
positive regulation of fibroblast proliferation	1	0	0	1
negative regulation of angiogenesis	1	0	0	1
positive regulation of JNK cascade	1	0	0	1
glial cell proliferation	1	0	0	1
positive regulation of extracellular matrix organization	1	0	0	1
heterophilic cell-cell adhesion via plasma membrane cell adhesion molecules	1	0	0	1
cell-cell junction maintenance	1	0	0	1
killing of cells of other organism	1	0	0	1
positive regulation of macrophage chemotaxis	1	0	0	1
positive regulation of cell population proliferation	2	0	1	0
embryonic skeletal system morphogenesis	1	0	1	0
regulation of sensory perception of pain	1	0	1	0
pattern specification process	1	0	1	0
cation transmembrane transport	1	0	2	0
negative regulation of amine transport	1	0	1	0
stem cell differentiation	1	0	1	0
synaptonemal complex assembly	1	0	1	0
cell surface receptor signaling pathway	1	0	1	0
adenylate cyclase-activating G protein-coupled receptor signaling pathway	1	0	1	0
diet induced thermogenesis	1	0	1	0
positive regulation of myeloid leukocyte mediated immunity	1	0	1	0
positive regulation of smooth muscle cell migration	1	0	1	0
retinol metabolic process	1	0	2	0
positive regulation of phagocytosis	1	0	1	0
response to dietary excess	1	0	1	0
L-alpha-amino acid transmembrane transport	1	0	1	0
cell differentiation involved in embryonic placenta development	1	0	1	0
bone trabecula morphogenesis	1	0	1	0
positive regulation of superoxide anion generation	1	0	1	0
labyrinthine layer morphogenesis	1	0	1	0
branching involved in labyrinthine layer morphogenesis	1	0	1	0
adaptive immune response	4	1	1	0
positive regulation of ERK1 and ERK2 cascade	4	1	0	1
response to bacterium	3	1	3	2
G protein-coupled receptor signaling pathway	3	1	0	3
positive regulation of T cell proliferation	3	1	1	0
B cell receptor signaling pathway	3	1	1	1
long-chain fatty acid metabolic process	2	3	2	0
immune response	2	2	0	1
cardiac muscle contraction	2	2	0	2
inflammatory response	2	2	0	2
skeletal muscle cell differentiation	2	2	1	2
neutrophil chemotaxis	2	2	1	2
positive regulation of acute inflammatory response	2	2	1	1
negative regulation of endopeptidase activity	2	1	1	2
defense response to virus	2	1	0	1
innate immune response	2	1	1	2
defense response to Gram-positive bacterium	2	1	1	1
positive regulation of neutrophil chemotaxis	2	1	1	0
positive regulation of T cell differentiation in thymus	2	1	0	1
leukocyte aggregation	2	1	0	2
cell adhesion	2	0	1	2
positive regulation of lipid catabolic process	1	4	2	0
regulation of lipoprotein lipase activity	1	4	1	0
oxidation-reduction process	1	3	3	0
unsaturated fatty acid biosynthetic process	1	3	2	0
brown fat cell differentiation	1	3	2	1
short-chain fatty acid metabolic process	1	3	1	1
cell maturation	1	2	1	0
cholesterol homeostasis	1	2	1	0
acyl-CoA metabolic process	1	2	1	0
microglial cell activation	1	2	1	0
response to fatty acid	1	2	2	0
triglyceride homeostasis	1	2	1	0
negative regulation of cytokine biosynthetic process	1	2	0	1
terpenoid biosynthetic process	1	2	1	0
regulation of skeletal muscle contraction	1	2	0	1
visual perception	1	1	0	1
cell-cell signaling	1	1	1	1
positive regulation of tumor necrosis factor biosynthetic process	1	1	1	0
positive regulation of GTPase activity	1	1	0	1
positive regulation of cAMP-mediated signaling	1	1	0	1
positive regulation of synapse assembly	1	1	1	1
cellular response to lipopolysaccharide	1	1	0	2
hydrogen peroxide catabolic process	1	1	1	1
adenylate cyclase-inhibiting G protein-coupled receptor signaling pathway	1	1	0	1
negative regulation of toll-like receptor signaling pathway	1	1	0	1
negative regulation of cytokine production involved in immune response	1	1	1	2
phagocytosis, engulfment	1	1	1	1
defense response to fungus	1	1	0	1
antigen processing and presentation of exogenous peptide antigen via MHC class II	1	1	1	0
leukocyte migration involved in inflammatory response	1	1	1	3
positive regulation of natural killer cell mediated cytotoxicity	1	1	0	1
positive regulation of CD4-positive, alpha-beta T cell differentiation	1	1	1	0
negative regulation of interleukin-10 production	1	1	1	1
SMAD protein signal transduction	1	0	1	2
positive regulation of fatty acid biosynthetic process	1	0	1	1
cell migration	1	0	1	1
peptidyl-cysteine S-nitrosylation	1	0	1	1
positive regulation of angiogenesis	1	0	1	1
defense response to Gram-negative bacterium	1	0	1	1
phasic smooth muscle contraction	1	0	1	1
phospholipid homeostasis	0	4	1	1
fatty acid catabolic process	0	3	1	1
negative regulation of lipase activity	0	3	3	1
triglyceride catabolic process	0	3	4	1
acute-phase response	0	2	1	2
intestinal absorption	0	2	3	1
response to glucose	0	1	2	2
defense response to bacterium	0	1	1	2
white fat cell differentiation	0	1	2	1
organic hydroxy compound catabolic process	0	1	1	1
regulation of oxidative phosphorylation	0	1	1	1
muscle contraction	0	2	0	3
lipoprotein metabolic process	0	2	0	1
negative regulation of cellular catabolic process	0	2	0	1
sarcomere organization	0	2	0	2
regulation of gastrulation	0	2	0	1
cardiac muscle fiber development	0	2	0	2
skeletal muscle thin filament assembly	0	2	0	3
positive regulation of fatty acid oxidation	0	2	0	1
protein localization to extracellular region	0	1	0	1
response to peptide hormone	0	1	0	1
cardiac muscle tissue morphogenesis	0	1	0	2
negative regulation of muscle contraction	0	1	0	1
negative regulation of transforming growth factor beta receptor signaling pathway	0	1	0	1
collagen fibril organization	0	1	0	1
cardiac myofibril assembly	0	1	0	3
negative regulation of blood coagulation	0	1	0	2
maternal behavior	0	1	0	1
positive regulation of circadian rhythm	0	1	0	1
secondary palate development	0	1	0	1
myosin filament assembly	0	1	0	1
negative regulation of interleukin-1 secretion	0	1	0	1
reflex	0	1	0	1
cellular modified amino acid catabolic process	0	1	0	1
transition between fast and slow fiber	0	1	0	1
response to activity	0	1	0	2
regulation of release of sequestered calcium ion into cytosol by sarcoplasmic reticulum	0	1	0	1
carboxylic acid transmembrane transport	0	4	2	0
fatty acid biosynthetic process	0	4	4	0
negative regulation of lipid catabolic process	0	4	1	0
ribose phosphate biosynthetic process	0	3	2	0
lipid storage	0	3	2	0
regulation of digestive system process	0	3	1	0
phospholipid biosynthetic process	0	3	3	0
fatty acid metabolic process	0	3	2	0
gluconeogenesis	0	3	3	0
pyruvate metabolic process	0	3	1	0
pentose-phosphate shunt	0	3	3	0
cholesterol biosynthetic process	0	3	4	0
acetyl-CoA metabolic process	0	3	2	0
acetyl-CoA biosynthetic process from pyruvate	0	3	1	0
lipid homeostasis	0	2	4	0
monosaccharide biosynthetic process	0	2	1	0
regulation of renal system process	0	2	1	0
positive regulation of nitric oxide biosynthetic process	0	2	1	0
phosphatidylcholine biosynthetic process	0	2	2	0
protein homotetramerization	0	2	1	0
negative regulation of systemic arterial blood pressure	0	2	1	0
triglyceride metabolic process	0	2	2	0
glucose metabolic process	0	2	1	0
positive regulation of cold-induced thermogenesis	0	2	3	0
mitochondrial transmembrane transport	0	2	1	0
response to cold	0	2	1	0
cholesterol esterification	0	2	1	0
cholesterol import	0	2	1	0
lipid droplet organization	0	2	1	0
fatty acid beta-oxidation	0	2	3	0
long-chain fatty acid import into cell	0	2	1	0
negative regulation of fatty acid oxidation	0	2	1	0
organophosphate catabolic process	0	1	1	0
amide transport	0	1	1	0
positive regulation of synaptic transmission	0	1	1	0
aromatic compound catabolic process	0	1	1	0
embryonic forelimb morphogenesis	0	1	1	0
regulation of cellular amide metabolic process	0	1	1	0
digestion	0	1	1	0
positive regulation of steroid metabolic process	0	1	1	0
regulation of cholesterol transport	0	1	2	0
positive regulation of smooth muscle contraction	0	1	2	0
glucose homeostasis	0	1	1	0
positive regulation of chemokine production	0	1	1	0
negative regulation of behavior	0	1	2	0
protein oxidation	0	1	1	0
retinal rod cell differentiation	0	1	1	0
mast cell activation	0	1	1	0
chloride transmembrane transport	0	1	1	0
positive regulation of macrophage activation	0	1	1	0
high-density lipoprotein particle remodeling	0	1	1	0
regulation of systemic arterial blood pressure mediated by a chemical signal	0	1	2	0
cytolysis	0	1	1	0
establishment of skin barrier	0	1	1	0
antibiotic metabolic process	0	1	2	0
cholesterol metabolic process	0	1	2	0
secondary alcohol metabolic process	0	1	1	0
long-chain fatty acid biosynthetic process	0	1	1	0
pentose metabolic process	0	1	2	0
carbohydrate phosphorylation	0	1	1	0
glucose catabolic process	0	1	1	0
positive regulation of lipid storage	0	1	1	0
benzene-containing compound metabolic process	0	1	1	0
fructose 6-phosphate metabolic process	0	1	1	0
regulation of cholesterol metabolic process	0	1	1	0
dicarboxylic acid metabolic process	0	1	1	0
NAD metabolic process	0	1	2	0
acylglycerol catabolic process	0	1	2	0
mitochondrial transcription	0	1	1	0
monocarboxylic acid catabolic process	0	1	1	0
NADH metabolic process	0	1	2	0
aerobic respiration	0	1	1	0
tricarboxylic acid metabolic process	0	1	1	0
cristae formation	0	1	1	0
respiratory electron transport chain	0	1	1	0
mitochondrial ATP synthesis coupled electron transport	0	1	1	0
tricarboxylic acid cycle	0	1	1	0
fatty acid beta-oxidation using acyl-CoA dehydrogenase	0	1	1	0
mitochondrial respiratory chain complex I assembly	0	1	1	0
mitochondrial electron transport, NADH to ubiquinone	0	1	1	0
