# Supplementary material for: Comparative multi-tissue profiling reveals extensive tissue-specificity in transcriptome reprogramming during thermal adaptation
Source: eLife. 2022 May 17;11:e78556. doi: 10.7554/eLife.78556 (PMC9113744; doi:10.7554/eLife.78556)
Supplement: Supplementary file 9. [file elife-78556-supp9.xlsx]

## Sheet: Suplementary File 9
Comparison	Tissue	Direction	Term	Annotated	Significant	Expected	weightFisher	genes	FC
10C vs RT	BAT	upregulated	fatty acid biosynthetic process	104	30	6.16	6.4e-07	Abhd3,Acaca,Acacb,Acly,Acot11,Acot12,Acsf3,Acss2,Alox12,Edn1,Elovl3,Elovl4,Elovl5,Elovl6,Fabp5,Fasn,Hacd2,Insig1,Mgll,Mid1ip1,Mif,Mlxipl,Mlycd,Myo5a,Ndufab1,Prkab1,Ptgds,Ptges,Scd2,Srebf1	0.805434406393021,1.1734491957475,0.972038913092122,1.65244401538312,2.02147978139315,2.49147583526248,0.770483055238921,0.90579306449004,1.57326804790434,1.08314157363759,3.51144589903266,1.91937752388481,1.3973714308859,1.57045376104255,1.13960101587041,1.32874490644762,1.24770237721997,0.713704927649003,0.761729863913323,1.63455037225583,0.801887031526641,0.907929178673767,0.659434822585439,1.…
10C vs RT	SAT	upregulated	fatty acid biosynthetic process	105	29	9.77	7.4e-05	Abcd3,Acaca,Acacb,Acadl,Acadvl,Acly,Acot11,Acsl3,Acss1,Acss2,Alox12,Apoc2,Cbr4,Elovl5,Elovl6,Fabp5,Hnf4a,Insig1,Mecr,Mid1ip1,Mlxipl,Ndufab1,Pdk4,Prkaa2,Ptges,Scd1,Scd2,Scd3,Scd4	1.00309655056571,0.873645842522523,1.01269909602355,1.06723996713235,1.30977619524948,1.54329083948579,4.6224570856273,1.34534064084872,0.763502131250563,1.45600177199398,0.751563590287718,1.44878709882887,1.06163097178699,0.670806282684604,2.37694559573638,1.38849736436725,1.82188423701018,1.83325155888053,0.772231604236414,1.45135292711867,1.45423888608205,1.08726268607447,1.7630186398947,0.695…
10C vs RT	VAT	upregulated	fatty acid biosynthetic process	111	22	7.88	5.4e-05	Abhd2,Acaca,Acly,Acsl3,Acsm3,Acss1,Acss2,Alox12,Elovl4,Elovl5,Elovl6,Fads2,Fasn,Insig1,Lipc,Lipg,Mid1ip1,Ptgds,Rgn,Scd2,Slc45a3,Tecr	2.29723695572467,1.33753239653797,2.35153140994253,1.47142451055938,1.34591575945473,0.95589591703192,1.96355871523996,1.08886618584093,5.19041759319815,1.22409202194479,2.09326621112328,1.11962715833367,1.67655555792233,2.36856168891817,5.49467455098583,3.82392039657926,1.77341841283307,3.30421498297034,2.85425865772826,1.34200090211641,2.89316373840545,1.19498185532112
10C vs RT	BAT	upregulated	phospholipid biosynthetic process	138	15	8.17	0.00578	Acsl5,Agpat2,Fabp5,Fdps,Idi1,Isyna1,Mvd,Pcyt2,Pgs1,Pigq,Pip5k1c,Pmvk,Pnpla3,Sgms2,Vac14	2.01383907637557,1.07457920437954,1.13960101587041,2.08719075242098,1.23396243675711,2.06719039650686,1.91695439205023,1.09155873329359,0.65889866688624,0.662421294144083,0.724697497808692,1.23242243166292,0.948858589109049,0.864467933296443,0.657412955401985
10C vs RT	VAT	upregulated	phospholipid biosynthetic process	141	19	10.01	0.00954	Acsl3,Agpat2,Cds1,Fdps,Hexb,Isyna1,Mboat1,Mboat2,Mvd,Pemt,Pgap1,Pgap2,Pgap3,Piga,Pip5k1b,Pla2g5,Serinc5,Sgms2,Sh3yl1	1.47142451055938,1.15313982239968,1.36198286084793,1.73937803833196,1.03846790493107,3.32833184131337,1.93026042068758,2.34099224300546,1.9035444702953,2.30757746842244,1.32037699985729,1.98630291329331,1.01997784811087,1.15926392401376,2.76058255219553,3.33849685189956,1.16669712259952,1.26390865942078,1.27976872087777
10C vs RT	BAT	upregulated	cholesterol biosynthetic process	38	15	2.25	2.0e-08	Cyp51,Dhcr24,Dhcr7,Fdps,Fgf1,G6pdx,Hsd17b7,Insig1,Lss,Mvd,Nsdhl,Pmvk,Sc5d,Srebf1,Tm7sf2	1.49647631761524,1.96596342968262,0.955083588933772,2.08719075242098,0.624876009317184,1.20889489578246,1.06156066457076,0.713704927649003,1.30054554133459,1.91695439205023,1.31527589904753,1.23242243166292,1.82600616773634,0.685818717124023,0.869730945935762
10C vs RT	SAT	upregulated	cholesterol biosynthetic process	39	18	3.63	2.6e-09	Apoa1,Apob,Cyp51,Dhcr24,Dhcr7,Fdft1,Fdps,Fgf1,Hmgcs1,Hsd17b7,Insig1,Lss,Mvd,Nsdhl,Pmvk,Prkaa2,Sc5d,Tm7sf2	1.63569870259893,1.50894568929245,1.63951616548338,1.08911364228186,0.653302369539947,0.677173111480112,1.55520207602345,0.644292043016506,1.16370207045833,0.997822320158165,1.83325155888053,1.13749483668018,1.55925310411629,1.07984481617785,1.37940855099859,0.695255047474808,1.56746690958814,0.767099064342128
10C vs RT	VAT	upregulated	cholesterol biosynthetic process	40	9	2.84	0.00023	Cftr,Cyp51,Fdps,Hmgcr,Insig1,Lss,Mvd,Nsdhl,Tm7sf2	1.95618906838809,1.6548642121465,1.73937803833196,1.41314500467134,2.36856168891817,1.22288688418546,1.9035444702953,1.64722860237598,1.85043493093541
10C vs RT	BAT	downregulatd	G protein-coupled receptor signaling pathway	356	45	27.56	5.6e-05	Ackr4,Actn2,Ada,Adcy5,Adcy9,Adcyap1r1,Adgrf3,Adra1d,Apoe,Camk2a,Casr,Ccl11,Ccr2,Ccr9,Cdk5r1,Celsr2,Crhr2,Cxcl10,Ffar2,Fzd9,Gabbr1,Ghrl,Gnas,Gng7,Gngt2,Gpr153,Gpr182,Gpr37l1,Gpr87,Hcar1,Hcar2,Homer2,Mas1,Met,Nos1,Olfr78,P2ry14,Pde4b,Pde6a,Rac2,Ramp1,Sag,Sctr,Sucnr1,Tas1r3	-1.02115251237398,-1.31265430814801,-0.761232374874405,-0.832587001512115,-0.830005386066096,-0.779878167392018,-2.6597567062322,-0.85064921410766,-1.14169611941056,-1.07349468863828,-0.660661840906046,-1.02165669292716,-0.721778670815325,-0.717630897678819,-0.943378543477552,-1.00217529874437,-1.13588319261336,-0.921691805702332,-1.06583442055712,-1.68908250053511,-0.640343207038521,-0.858005872…
10C vs RT	SAT	downregulatd	G protein-coupled receptor signaling pathway	435	100	50.2	0.00134	Abca1,Ackr1,Ackr2,Actn2,Adcy1,Adcy2,Adcy5,Adcyap1r1,Adgra2,Adgrb2,Adgrd1,Adgre1,Adgrg1,Adm,Adora2b,Adra1b,Adra1d,Adra2a,Agt,Agtr1a,Agtrap,Akap12,Ano1,Aplp1,Apoe,Atp2b4,C3,C3ar1,C5ar1,Cacna1a,Camk2a,Ccr1,Ccr5,Celsr2,Cnr1,Cx3cl1,Cx3cr1,Cysltr2,Dnm1,Ece1,Edn1,Ednra,Entpd1,Entpd2,Ffar2,Flna,Fzd1,Fzd2,Fzd4,Gabre,Gabrr2,Gnai1,Gnal,Gng7,Gpr1,Gpr153,Gpr156,Gpr161,Gpr27,Gpr37l1,Gpr75,Hcar1,Hcar2,Igf2r,Itg…	-1.01220859397732,-1.2700317790876,-1.12941586402969,-1.48544390151461,-0.813723593559779,-1.12185003506859,-1.34098630597869,-0.629618800317264,-1.02145388916345,-1.01179721701059,-1.45289689319481,-0.699974601599194,-0.752493732572781,-1.26331079704121,-0.756040010502489,-1.95715809539398,-1.23471324815212,-1.32173067699934,-2.20395828894609,-0.758309020129532,-0.676435984005697,-1.087954782613…
10C vs RT	VAT	downregulatd	G protein-coupled receptor signaling pathway	426	37	18.03	0.00086	Adcy1,Adcyap1r1,Adgrv1,Adra1d,Adrb3,Calca,Cav1,Ccl2,Ccl7,Chrm3,Cxcl10,Drd1,Fzd4,Gabre,Glp2r,Gnai1,Gnao1,Gnb4,Gng7,Gpr152,Gpr17,Gpr174,Kcnk2,Mc2r,Mrgprb1,Mrgprx2,Npr3,Olfr1033,Olfr1034,Olfr734,Palm,Rgs1,Rgs6,Rgs7bp,Sctr,Syp,Ywhab	-1.14630614286413,-1.40125200241816,-1.43369988004385,-1.07619572273701,-0.979162921554626,-1.15347473470676,-0.969909453328314,-1.82216551328463,-1.9765655290397,-1.18498490788767,-1.21718727515307,-1.37578126708446,-1.44306883156158,-1.11106568169438,-1.46144636836451,-1.18711833671002,-1.27590184635428,-1.20210982771125,-1.10185019837102,-1.05115514374387,-1.20596548886013,-1.16688750010033,-1…
10C vs RT	BAT	downregulatd	muscle contraction	207	67	16.02	3.6e-11	Abat,Actn2,Actn3,Ada,Akap6,Atp2a1,Cacna1g,Cacna1h,Cacna1s,Cacna2d1,Cacnb2,Casq1,Cav3,Clcn1,Csrp3,Ctnna3,Dmd,Fgf13,Ghrl,Grip2,Jsrp1,Kcna1,Kcnj2,Kcnma1,Lmod1,Lmod2,Lmod3,Met,Mybpc1,Mybpc2,Myh1,Myh2,Myh4,Myh7,Myl1,Myl2,Myl3,Mylk2,Myom1,Myom2,Nos1,Pde4b,Pgam2,Ppp1r13l,Prkg1,Ryr1,Scn1b,Scn4a,Scn4b,Scn5a,Slc8a3,Stac3,Sulf2,Tcap,Tmem38a,Tmod1,Tmod4,Tnnc1,Tnni1,Tnni2,Tnnt1,Tnnt3,Tpm1,Tpm2,Trim63,Trpv1,Ttn	-0.724460006073066,-1.31265430814801,-0.800503313820486,-0.761232374874405,-1.01160099237682,-0.870346646501227,-0.793153959509037,-0.832401219599452,-0.903465760515714,-0.740233841872563,-0.732602233462291,-0.775365839023161,-0.947049652339777,-1.08734618906153,-0.959075436968718,-0.727968526431933,-0.891794126234882,-0.883103917532298,-0.858005872505244,-0.713363619593437,-0.824641582779941,-0.…
10C vs RT	SAT	downregulatd	muscle contraction	223	60	25.74	0.00366	Abat,Acta2,Actn2,Actn3,Adora2b,Adra1b,Adra2a,Agrn,Agt,Akap6,Anxa6,Atp1a1,Atp2a1,Atp2b4,Cacna1c,Cacna1g,Cacna1s,Casq1,Comp,Dbn1,Edn1,Ednra,Ehd3,Fgf13,Flna,Gaa,Hcn4,Jsrp1,Jup,Kcna1,Kcne1l,Kcnj8,Lmod3,Mybpc1,Mybpc2,Myh1,Myh11,Myh2,Myh4,Mylk2,Myom2,Pgam2,Pkp2,Ptafr,Ptgs1,Ryr1,Scn4a,Scn4b,Slc9a1,Smpd3,Stac2,Sulf1,Sulf2,Tcap,Tnni2,Tnnt3,Tpm1,Tpm2,Tshz3,Ttn	-1.2554471061736,-1.67688547727431,-1.48544390151461,-0.888695684902508,-0.756040010502489,-1.95715809539398,-1.32173067699934,-0.655689199997975,-2.20395828894609,-0.847620482925576,-0.890823333128891,-0.71011982877089,-1.05365887102289,-1.4595516621714,-0.608054160136797,-1.49531853211479,-0.770000809110091,-1.10749182701054,-0.93261589057046,-0.961070408880404,-0.723126274450402,-0.97260496208…
10C vs RT	SAT	downregulatd	leukocyte migration involved in inflammatory response	20	8	2.31	0.00108	Adam8,Aoc3,Cx3cl1,Ffar2,Itgam,Itgb2,Lbp,Ptn	-0.702019809482889,-1.26283571501398,-1.07964632671587,-1.24196024466035,-1.10617488037696,-0.740783800521184,-1.59364913229121,-2.12751392771795
10C vs RT	VAT	downregulatd	leukocyte migration involved in inflammatory response	17	5	0.72	0.00054	Adam8,Aoc3,Ccl2,S100a8,S100a9	-1.13078096000153,-1.48563635482739,-1.82216551328463,-2.01263324177063,-1.75986903196491
34C vs RT	SAT	downregulatd	fatty acid biosynthetic process	102	34	10.62	9.4e-10	Abcd3,Abhd3,Acaca,Acacb,Acadl,Acadvl,Acly,Acot11,Acsf3,Acsm3,Acss2,Apoc2,Cbr4,Elovl5,Elovl6,Fabp5,Fasn,Insig1,Lias,Mecr,Mgll,Mlycd,Ndufab1,Nr1h3,Pdk4,Pecr,Pnpla8,Prkag3,Ptges,Ptges2,Scd1,Srebf1,Tecr,Thnsl2	-1.06983273333559,-0.644852838184483,-1.55906847474948,-1.33060983557241,-1.39348184230871,-1.47169379271904,-1.53145109652948,-1.59306122023799,-0.674592581714563,-0.953299989087125,-1.53354680147099,-1.15646706866744,-0.843114574550823,-0.621918277679553,-2.21064060224755,-1.03902448788138,-1.55845437370103,-1.38449290598548,-0.693116434005427,-1.01681805633526,-0.846756131318222,-0.97788931341…
34C vs RT	VAT	downregulatd	fatty acid biosynthetic process	102	15	2.58	6.8e-05	Acaca,Acly,Acss2,Alox15,Apoc2,Elovl6,Fabp5,Fasn,Insig1,Lipg,Pdk4,Ptges,Scd1,Scd2,Tecr	-1.38587971642806,-1.6364201485008,-1.73095336297764,-0.732032337916073,-0.699249055191011,-2.29926927414318,-0.820487920589308,-1.38848708102068,-1.12886062910315,-0.646575102002061,-0.679108460144272,-0.839464708360784,-1.79968971314046,-0.953857580010586,-0.646898704897909
34C vs RT	BAT	downregulatd	fatty acid biosynthetic process	94	28	7.42	5.4e-09	Abcd3,Acaca,Acacb,Acly,Acot11,Acsf3,Acsl3,Acss2,Decr2,Elovl3,Elovl5,Elovl6,Fasn,Mgll,Mlycd,Myo5a,Nr1h3,Oxsm,Pdk4,Pnpla8,Ptges,Ptges2,Ptgis,Scd1,Scd3,Scd4,Tecr,Thnsl2	-1.48255874855226,-1.90070591269147,-0.919119051219648,-1.97628282300092,-2.36197635960245,-0.731284779470336,-1.02311933316776,-1.98068254238052,-0.762447254560592,-5.80598647650741,-1.19602138214198,-2.41193347003495,-2.769115729724,-1.15945964401244,-1.04806950877812,-0.81011580585211,-0.712136082058533,-0.922174294809728,-0.673844637933312,-0.710059037676733,-0.791812383346889,-0.633912983328…
34C vs RT	SAT	downregulatd	phospholipid biosynthetic process	141	31	14.68	0.00103	Abhd5,Acsl6,Agpat2,Agpat3,Apoa1,Apoa2,Chpt1,Crls1,Dolk,Fabp3,Fabp5,Fdps,Fitm1,Fitm2,Gnpat,Gpam,Hmgcs1,Idh1,Lpcat3,Pcx,Pemt,Pik3cb,Pla2g6,Pmvk,Pnpla3,Ptdss2,Ptpmt1,Pyurf,Sgms2,Sh3glb1,Slc27a1	-0.996569640019961,-0.90439572255866,-2.09424105290189,-0.777725812819562,-2.89777269834736,-1.29679420379951,-1.21845040209194,-1.13873696242864,-0.907432630142365,-1.63306468955207,-1.03902448788138,-0.999244122281032,-0.65154133048441,-1.09442351014468,-0.861209035621448,-0.69573098242574,-0.792274215413902,-0.742977029512859,-0.83686652914844,-1.17980279787104,-1.06828729435471,-0.90350542467…
34C vs RT	VAT	downregulatd	phospholipid biosynthetic process	141	12	3.57	0.00411	Agpat2,Alox15,Apoa1,Apoa2,Fabp5,Fdps,Gpam,Hmgcs1,Pcx,Pmvk,Pnpla3,Sgms2	-1.09268853674951,-0.732032337916073,-2.83703318834255,-2.5097548619432,-0.820487920589308,-1.01840836140963,-0.862369021475624,-1.12696358122471,-0.721193615946649,-0.661026060107771,-0.745889490406297,-0.813259597086576
34C vs RT	BAT	downregulatd	phospholipid biosynthetic process	126	28	9.94	1.9e-06	Abhd5,Acsl3,Acsl5,Agpat2,Capn2,Chpt1,Crls1,Dolk,Fdps,Gpam,Hmgcs1,Hmgcs2,Idi1,Impa1,Isyna1,Lclat1,Lpcat3,Mppe1,Pcx,Pcyt2,Pigq,Pmvk,Pnpla3,Ptdss2,Pyurf,Slc27a1,Sphk2,Vac14	-1.41306019466028,-1.02311933316776,-2.35026585024327,-2.4222673107015,-0.895929544118871,-0.916436979894127,-0.763921258113294,-0.862432391251505,-1.35765368177082,-1.33853729890512,-1.04240348631565,-1.32721076469358,-1.22976589128167,-0.63273598018554,-1.27231751700032,-0.997986476814084,-0.932555398796795,-0.917819697176073,-0.62534223650938,-1.28214025768401,-0.611289167187404,-1.49004043703…
34C vs RT	SAT	downregulatd	cholesterol biosynthetic process	39	16	4.06	1.6e-05	Apoa1,Ces1d,Cyb5r3,Fdps,G6pdx,Hmgcs1,Insig1,Lss,Nsdhl,Pmvk,Por,Sc5d,Scp2,Sod1,Srebf1,Tm7sf2	-2.89777269834736,-0.868490582175558,-0.627703067020794,-0.999244122281032,-1.02689601504748,-0.792274215413902,-1.38449290598548,-0.865484435325355,-1.12543751751191,-0.9157973184988,-0.674932884796043,-0.799514192222,-0.916553404514811,-0.922567499705602,-0.869876990047706,-0.675430115701503
34C vs RT	VAT	downregulatd	cholesterol biosynthetic process	39	11	0.99	2.1e-10	Apoa1,Cyp51,Dhcr24,Fdps,G6pdx,Hmgcs1,Insig1,Lss,Nsdhl,Pmvk,Sc5d	-2.83703318834255,-0.765487905080291,-0.679192884817675,-1.01840836140963,-0.684454431647973,-1.12696358122471,-1.12886062910315,-0.834887606682114,-0.915758862684735,-0.661026060107771,-0.742910608063143
34C vs RT	BAT	downregulatd	cholesterol biosynthetic process	37	11	2.92	3.3e-05	Dhcr24,Fdps,G6pdx,Hmgcs1,Hmgcs2,Hsd17b7,Lss,Nsdhl,Pmvk,Por,Sc5d	-0.960845842015387,-1.35765368177082,-1.25374545505245,-1.04240348631565,-1.32721076469358,-0.640452821005482,-0.992495678987107,-1.55280124087177,-1.49004043703659,-0.697336238654042,-0.690492651283119
34C vs RT	SAT	upregulated	negative regulation of extrinsic apoptotic signaling pathway in absence of ligand	29	12	5.43	0.00392	Agap2,Bcl2,Cx3cl1,Cx3cr1,Eya2,Fyn,Gata1,Il1b,Il7,Mapk7,Tert,Tnf	1.38573641673203,0.865471067761813,0.99147546537418,1.30629973109949,0.760244435515207,0.783912958342789,0.775280797620692,1.2715373362772,0.742441613020389,0.662697752016056,1.26549592311137,1.2670217744462
34C vs RT	VAT	upregulated	negative regulation of extrinsic apoptotic signaling pathway in absence of ligand	29	5	1.14	0.00501	Agap2,Eya1,Eya4,Snai2,Unc5b	0.608315374760118,0.69216460995128,0.650402105934542,0.642836118996791,0.652205250922613
34C vs RT	BAT	upregulated	negative regulation of extrinsic apoptotic signaling pathway in absence of ligand	25	10	3.8	0.00237	Agap2,Bcl2,Cx3cl1,Cx3cr1,Eya1,Eya2,Gas1,Il1b,Mcl1,Pf4	0.984702358373092,1.45531882917547,1.32298168778717,1.11431477409821,1.59312144423615,1.33473036688287,0.631881075126901,1.75190095629239,0.678995073872242,0.867010867461433
34C vs RT	SAT	upregulated	cell fate determination	23	10	4.3	0.00546	Bmp4,Cyp26b1,Gata2,Gata3,Hes1,Hoxa2,Jag2,Mef2c,Sox17,Tbx2	0.783545677561527,1.41172369944739,0.699431094684414,1.5367341761947,0.668517930901221,0.71054528596609,0.724564075976511,1.05344464171683,0.95573739910329,1.02500113036275
34C vs RT	VAT	upregulated	cell fate determination	23	8	0.9	1.6e-06	Cyp26b1,Gata2,Gata3,Hes1,Hoxa2,Isl1,Sox17,Tbx2	1.69321939692182,0.936686096785264,0.986520944813435,0.6074520232796,0.630531805964732,0.601144392416098,0.98931254213054,0.726560496441451
34C vs RT	BAT	upregulated	cell fate determination	23	9	3.5	0.00463	Atoh1,Bmp4,Chrdl1,Cyp26b1,Hes1,Ntf3,Ptch1,Sox17,Tbx2	1.21267371104468,1.11619843315665,0.64530136117265,2.18732811215189,2.00281176421946,0.826696393502777,0.694400397604345,0.805668867663503,1.0504339832287
34C vs RT	SAT	upregulated	negative regulation of Notch signaling pathway	29	12	5.43	0.00392	Arrdc1,Bend6,Dll4,Gata2,Hey1,Hey2,Jag2,Lfng,Notch4,Nrarp,Pear1,Slc35c1	1.18387208894282,0.976728443710207,1.08852720876068,0.699431094684414,0.701213812333194,1.33762804680993,0.724564075976511,0.909872501629083,0.668692261874871,0.774973244699448,0.852041120526637,0.625417860007879
34C vs RT	VAT	upregulated	negative regulation of Notch signaling pathway	29	5	1.14	0.00501	Dll4,Egfl7,Gata2,Hey1,Pear1	1.09435791939888,0.604045823815331,0.936686096785264,0.755971800959413,0.657041676913908
34C vs RT	BAT	upregulated	negative regulation of Notch signaling pathway	29	10	4.41	0.00815	Chac1,Dlk1,Dll4,Egfl7,Gdpd5,Hey2,Lfng,Notch4,Nrarp,Pear1	1.59570689359999,0.715196547383401,1.40325747315054,0.846739637449012,0.916436392240467,0.910863122656813,1.61796046681318,0.793438069057708,1.49043771956938,0.604896024647111
