# Supplementary material for: Comparative multi-tissue profiling reveals extensive tissue-specificity in transcriptome reprogramming during thermal adaptation
Source: eLife. 2022 May 17;11:e78556. doi: 10.7554/eLife.78556 (PMC9113744; doi:10.7554/eLife.78556)
Supplement: Supplementary file 10. [file elife-78556-supp10.xlsx]

## Sheet: Suplementary File 10
symbol	marker	Brain_RT	Brain_CE	Hypothalamus_CE	Hypothalamus_RT	Bonemarrow_RT	Bonemarrow_CE	Spinalcord_RT	Spinalcord_CE	Spleen_CE	Spleen_RT	Ileum_RT	Ileum_CE	Liver_RT	Liver_CE	VAT_RT	VAT_CE	SAT_RT	SAT_CE	BAT_RT	BAT_CE	muscle_RT	muscle_CE	Tissue/condition with zeros	Max in which tissue
0610007P14Rik		573.5	656.667	436.667	508.333	452.333	575.167	930.6	819.2	342.667	364.333	1157.67	1107	760	759.667	174.667	385.333	154	191.667	130.667	185.333	95.3333	161.667	0	Ileum_RT
0610009B22Rik		320	346.333	220	265.333	165.833	198.5	464.2	404.8	120.333	117.667	253	278	238.667	336.667	282.333	498	232.333	434	463	571	818.667	1071	0	muscle_CE
0610009O20Rik		687.5	756.667	612	729.667	1019.17	1305.83	1352	1257	748.333	799.667	653	534.667	612.333	689.333	496.333	755.667	524	566	1119	1114.33	5393.67	6050.33	0	muscle_CE
0610010F05Rik		1422	1507.33	1259.33	1469	328.833	380.333	1487.8	1408.4	359.667	327.667	519.333	448	398.667	495.333	880.333	1068	698.333	1006.33	1167.33	1135.67	856	1142	0	Brain_CE
0610010K14Rik		240.5	253	149	211.667	589.167	710.167	520.6	572.8	326.333	349	197.667	178.333	121.667	148.667	271	293	304.667	257.333	258	199.333	771.333	805	0	muscle_CE
0610030E20Rik		141.5	194.667	327.333	364.333	2639.83	2765.33	779.8	748.6	1101.33	900.667	983.667	820.333	737.333	739.333	740.667	739.333	796.667	794.667	686.667	588.667	879	1319	0	Bonemarrow_CE
0610037L13Rik		462.5	487	552.667	630	321.833	347	950.2	884.2	587	566.667	502.667	467.667	288.667	362.667	488.667	736.333	562	652.333	695.333	577.667	1152	1281.33	0	muscle_CE
0610040J01Rik		105.5	114	31.6667	51.3333	51	50.1667	81	91.6	43	50.3333	880	835	489.667	565.667	28.6667	18.3333	18.6667	14.3333	11	10.3333	653.333	722.667	0	Ileum_RT
1110001J03Rik		443	432	259.667	284.667	187.833	226.333	440.2	454.8	165.667	160.667	241.667	303.667	369	452.333	229.333	320.667	329	590.667	1765.67	2071	1657.67	1843	0	BAT_CE
1110004E09Rik		454.5	497	301.333	340.667	159.333	218.833	485.6	465.2	160.333	158.333	193.667	201.667	189	234	167.667	263.667	172.667	194	341	472.333	981	1106.67	0	muscle_CE
1110004F10Rik		998.5	1096	798.333	936.667	784	981.333	1088	993.8	667.667	643	616.667	513	365.333	436.667	498	695	426.333	449	548.667	540.667	1822.33	1933	0	muscle_CE
1110008F13Rik		292	361.333	148.667	187.667	2021.5	2122.5	944.8	966.8	384.333	449	386.333	398.667	497.667	660.333	215	452.667	372.333	563.333	1414	1297.33	2179	2582.67	0	muscle_CE
1110008L16Rik		133	175	163.333	196	176.667	228.667	187.2	171.2	242.333	244.333	336	269	236	267.667	183.333	295.333	212.333	199.333	408	319.333	607.667	669.333	0	muscle_CE
1110008P14Rik		1414.5	1419	311.667	390.667	327.667	362.833	1620.8	1590.8	207	215	177	196	245.667	233.333	283.667	705.667	359.667	653.667	993.667	1137	773.667	831	0	Spinalcord_RT
1110012L19Rik		169.5	166	115.667	133	140.5	156	271.4	279.2	129.333	127.333	168	166.333	123.333	155	137.333	199	155.667	187.667	210	199.667	896	1013	0	muscle_CE
1110032A03Rik		466.5	542	423.667	556	201.5	243.667	1008.4	920.6	205.667	209.667	367	348.667	379	467.333	836.667	1026.67	675.333	971.667	1240	1859.67	551	790	0	BAT_CE
1110034G24Rik		152.5	147	102.667	130.667	183.5	222.667	228.6	193.2	205.667	201	112.333	104.667	113.333	129.333	82	128.333	107.333	113	116.667	102.667	191	227.667	0	Spinalcord_RT
1110037F02Rik		1412	1755.67	1472.67	1725	2182	2574.33	1396	1367	2714.33	2491.67	2301.33	1896.67	823.667	902.667	1480.67	1836.67	1533.67	1216.33	1642	1365.33	1021.33	1339.67	0	Spleen_CE
1110038F14Rik		232.5	261	139.667	198.333	267	325.833	328.2	330.6	273	246.667	251.667	210	87.6667	106.333	164.333	216.333	187	170.667	222.667	219.333	544.333	652	0	muscle_CE
1110051M20Rik		1532.5	1649	1725	2083.67	62.1667	75.1667	2461.6	2286.6	222.667	213.333	164	120.333	61	71.6667	175.667	282	195.333	155	154.667	93.3333	696.333	701.667	0	Spinalcord_RT
1110059E24Rik		437.5	428	343.333	405.667	244	298.333	551.6	506	690.333	568.333	1132.33	1163.67	265.333	326.333	275.333	431.667	315.333	385.333	271.333	276.667	296	326.333	0	Ileum_CE
1110059G10Rik		203.5	237	166.667	212	283.833	331.333	229.6	199	310.333	292	339.333	298.667	132	183.333	193	273.667	183.667	235	195.333	182.667	247.667	254.333	0	Ileum_RT
1110065P20Rik		212	197.667	100	132.667	67.6667	79.1667	618.6	643.2	43	43.3333	48.3333	56	69.3333	85	71	163	81	105.333	181.333	147.667	554	600.333	0	Spinalcord_CE
1190002N15Rik		1105.5	1363	553.667	629.667	519.833	665.5	680.4	657.4	575	587.333	502.333	470	765.333	832	590.333	802.667	540	579	602.333	489	181.667	281	0	Brain_CE
1190007I07Rik		68.5	70.6667	56.6667	68.6667	72.5	82.5	100	94.2	73	84.6667	96	90.6667	88	98.6667	64	101	69	93.6667	212	211.667	506.333	571.333	0	muscle_CE
1500011B03Rik		1252	1425.33	1454.67	1747	139.333	171.5	1939	1891.2	182.667	169	81	58.6667	14	9.66667	111.333	601.667	97.3333	76.3333	35.3333	46	43	66.6667	0	Spinalcord_RT
1600002H07Rik		142	150	110.667	131.667	446.167	550.667	253.4	228.6	176.667	219	124	107	1028.33	1274.67	76	107	120.333	133.333	101.667	92	84.3333	116.667	0	Liver_CE
1600002K03Rik		43.5	29.6667	51.6667	60.3333	99	115.167	111.6	102.4	111	115.667	106.333	122	54.6667	49	70	107	69.6667	76.6667	75.3333	74.6667	271.667	316.667	0	muscle_CE
1600012H06Rik		212.5	263.667	188	233	520.5	550.167	503.4	454	579.333	471	749.333	698	455.667	484	506	649	404.333	464.667	420.333	352.333	446.667	548	0	Ileum_RT
1600014C10Rik		671	767.667	670.333	712	1344.67	1269.67	979.6	953.8	577	549	392	316	2636	2923.33	1648.67	1526.67	2187	1835	1938	2141	1988.67	2354.67	0	Liver_CE
1700010I14Rik		20.5	27.6667	54	75.6667	84.8333	79.6667	54.4	46.6	49.3333	47	34.3333	31	14.3333	14	32.3333	61.6667	17.3333	30.3333	8	18.6667	10	19	0	Bonemarrow_RT
1700017B05Rik		192	208.667	266.667	320.333	1466	1954	377.4	352.8	760	863.667	915.333	753.667	356.333	281.667	437	486	424.667	445.333	558.667	456.667	246	309.333	0	Bonemarrow_CE
1700021F05Rik		324	382.667	282	343	134.667	160.833	542	513	190	166.333	456.333	392.667	312	374	283	383.667	323	669.667	1314.67	1522	2186	2366.33	0	muscle_CE
1700025G04Rik		1293.5	1641.67	1860.67	2049	256.167	271.167	2601.8	2474	351.667	319.333	861.667	702.333	95	92	215	277.667	250.667	249	279.333	238.333	4683	5722.33	0	muscle_CE
1700029I15Rik		36	30	81.6667	77.3333	8.33333	13	20.6	26.4	55.3333	40.6667	69.6667	59	31.3333	37.6667	56.3333	79.3333	64.6667	138	82	69.3333	5.66667	9.33333	0	SAT_CE
1700029J07Rik		36	43.3333	158.333	178.333	22.8333	28.8333	241.8	234.4	132	109	44	37.6667	20.6667	21	97.3333	239.667	92.3333	80	53.3333	44.3333	48.6667	57.6667	0	Spinalcord_RT
1700030K09Rik		150.5	178.667	191	211	108	152.167	298.6	279.6	285.333	251.667	93.6667	78.6667	75.3333	72.6667	145.333	174.667	174.667	142	173.667	170.333	218.333	263.667	0	Spinalcord_RT
1700037C18Rik		96	101	115.667	147	43.8333	51.5	104	91.8	191	183.333	120.667	110.333	40	42.6667	96	133.667	94	96.3333	78	58	83.6667	83.6667	0	Spleen_CE
1700037H04Rik		659.5	743	632	749	1455.33	1789.5	1406.6	1400	267	387.667	146	146.333	79.6667	79.6667	659.333	866.667	1473.33	2370.67	3579.33	8503.33	247	801.667	0	BAT_CE
1700066M21Rik		507	619.667	401	455.333	204	241.5	636.6	603.6	231.333	189	155	161	618.667	677	138.333	346.333	121.667	238.667	165	206.667	122.667	151.667	0	Liver_CE
1700102P08Rik		17.5	20.6667	28.3333	35.3333	53.5	62.5	18.8	23	41.6667	37.6667	24	21.3333	5.33333	9.33333	12	19	11	16.6667	9.33333	9	12	35.3333	0	Bonemarrow_CE
1700109H08Rik		56.5	50.6667	151.333	212	26.5	29.8333	31.8	29.8	252.667	211.333	170	130.667	63.6667	55.3333	139.333	191.333	113.333	159.333	104.333	81.6667	98	111.333	0	Spleen_CE
1700112E06Rik		26.5	25	31.6667	41	58.6667	53.6667	35.6	33	85.6667	87.6667	47.3333	37.3333	21.3333	24	255.333	284	187	209.667	127.667	136	90.6667	93.6667	0	VAT_CE
1700123O20Rik		236	290	203.667	229.333	804.333	898.333	511.2	487.6	383.667	422.333	523	557	293	358.667	238.667	425.333	240	434	427.333	550	319.333	488.667	0	Bonemarrow_CE
1810010H24Rik		61	63.6667	69.6667	74.3333	6.33333	8.83333	75.6	78	30	25.3333	30	22.6667	27.3333	34.6667	50	61.6667	50	47.6667	35	38	48.3333	51.6667	0	Spinalcord_CE
1810011O10Rik		24	30.6667	17.3333	25	13.6667	20.5	49.2	39.2	405.333	291.333	2045.67	2284	187	269.667	670.333	1044.67	1132.33	1115	3502.67	2192.33	427.333	769.667	0	BAT_RT
1810013L24Rik		969	1226.33	1308	1435	1472	1739.83	1424.6	1418.8	1432.33	1383.67	1696.33	1563	627	732.333	1119.67	1205.33	1063	1024.67	1071.33	973.667	2200	2368	0	muscle_CE
1810022K09Rik		108	104.667	145	201.333	76.8333	85.3333	112	101.2	252.333	223	261.667	205.333	85	98.6667	219.333	458.667	191.333	288.667	226	205.333	386	472.333	0	muscle_CE
1810030O07Rik		351	434.667	510.667	567.667	792.5	878.833	796.8	735.8	817.667	820.667	847.667	676	150.333	169	412.667	635.333	468.667	441.333	535.333	474.333	706.333	769.667	0	Bonemarrow_CE
1810032O08Rik		34	32.6667	51.6667	77	132.333	158.167	84.4	68.8	160.667	185.333	132.333	111.667	26	26.6667	67.6667	121	79.3333	76	86.6667	79.3333	70.3333	100.667	0	Spleen_RT
1810037I17Rik		508.5	535	273	340.333	555.5	560.333	859.8	792.4	295.667	320.333	531.667	606.333	118	159.667	446	754.667	456.667	410.667	460	348.667	798.333	953	0	muscle_CE
1810043G02Rik		676.5	724.667	869.333	934.333	121.167	128.5	1002	977.4	200.667	201.333	116	81.3333	93.6667	108.333	390.667	449.333	366.333	422	600.667	745.667	220.333	223.667	0	Spinalcord_RT
1810055G02Rik		214	268.333	129	159.333	416.167	404.667	448.6	436.6	53.6667	65.6667	341.333	350.333	235.333	224	103.333	176.333	108.333	83.3333	90	79	437.333	548	0	muscle_CE
2010107E04Rik		1387	1381	702.667	783.333	931.833	1122.67	2374.8	2271.8	605.667	676	1727.33	1852.67	1000.67	1201.67	803.667	1407.33	957.667	2295.33	3625.67	4796.67	7849	9157	0	muscle_CE
2010111I01Rik		1398.5	1442	1111.67	1274.33	114.333	147	328.6	305	1251.33	1159.67	2077.67	1868.33	781	803	719.667	1256	702.333	875.333	789.667	1108.67	603.667	735.667	0	Ileum_RT
2010315B03Rik		221.5	261	557	642.333	185.5	224.833	453.4	389.8	732.333	557	1335	944	458	508	506	707.333	470.333	668.333	497	691	261.333	393.333	0	Ileum_RT
2200002D01Rik		6.5	7.66667	14.6667	10	14.8333	18.8333	7.6	5.6	40.3333	50.6667	5259.67	5679	170.333	164.667	26.6667	30	25.3333	34	21.3333	16.3333	15.3333	16.6667	0	Ileum_CE
2210016F16Rik		259	280.667	315.667	384.667	419	501.667	423.2	400	685.667	665.333	3277.33	3521	526	654.333	604.667	978.333	724.333	872.667	1069.67	1253.67	551	611.667	0	Ileum_CE
2210016L21Rik		1817	2014.33	1402.67	1776	270	326.167	2610.8	2706	437.667	423.667	585.667	513.667	207	227.667	265.333	364.667	273	225.667	191	209	890	891.333	0	Spinalcord_CE
2210408I21Rik		712	753	517.333	615.667	26	39.3333	216	204.6	115	97	126	86	95.6667	86.6667	312.333	412	198.333	195.667	159.667	146.333	95.6667	99.3333	0	Brain_CE
2300009A05Rik		166.5	169	164.667	188.667	50	57.3333	171.6	171.8	190	152.667	183	140.333	174.333	193.667	168	281.333	192.667	309.333	481.667	397.333	195.667	197.667	0	BAT_RT
2310009B15Rik		84.5	96	59	78	33.3333	42.6667	127.4	122.4	38	50.3333	49	50.3333	29.6667	40.3333	68.6667	91.3333	74	94	101.667	109.667	202.667	228.333	0	muscle_CE
2310011J03Rik		585.5	628.667	294.667	323	809.833	915.833	870.8	822.8	624.667	604.667	610.667	635	213.667	272	385	486.667	433.333	397	443	463.333	461	581.667	0	Bonemarrow_CE
2310022A10Rik		259.5	269	209	228	559.167	695.667	715	742.4	158.333	172.333	143.333	106	56.3333	48.6667	79.6667	84	120	84.3333	120.333	93.6667	4085.33	4295.67	0	muscle_CE
2310022B05Rik		887.5	980	1417.67	1645	1099.5	1533.17	4465.2	4311.8	656.667	647.667	337	286.667	206	173	281.667	230.333	299.333	155.333	190.333	174.333	950	899.333	0	Spinalcord_RT
2310033P09Rik		223.5	243.333	207.333	244.333	352.5	443.833	312.8	315.6	317.667	316	238.667	210	90.6667	120.667	131.333	251.333	177	140.667	161.333	104	99.3333	100.667	0	Bonemarrow_CE
2310035C23Rik		2046.5	2577.67	2306	2706.33	1029	1185.33	2056.8	1920	2283.33	2171.33	4123.67	3476.33	827	967.333	1193	2075.33	1059.67	1326	921.667	741.333	356	565	0	Ileum_RT
2310036O22Rik		1005.5	1159.67	824.667	923.333	1700.67	1926.33	1084.4	1167.2	1525	1729.67	1487.67	1463.33	785	990	664.333	1012.33	766.667	748.333	821	892.333	1120.67	1235.67	0	Bonemarrow_CE
2310039H08Rik		79	72.6667	58	66	95.5	112.167	70.4	73.2	159.667	157.333	201.333	208.333	403.667	559.667	273.333	460.333	243.333	363.333	460.667	653	499.667	455.667	0	BAT_CE
2310057M21Rik		476	553.333	575.333	782.667	144.333	179.333	508.8	485.4	385.667	384	414.333	380.333	127.333	146.333	291	436	282	310.667	343.333	251	571	726.333	0	Hypothalamus_RT
2310061I04Rik		249	265.667	226	280.667	298.667	371	1607	1502.6	101.667	112	242.667	194	175.333	128	111	122.667	117	139	386.333	370.667	3133	3035	0	muscle_RT
2410002F23Rik		704	745	881.333	1045.33	395.833	486.833	881.8	763.8	964	957.333	788.667	656.333	122	149.333	417.667	867.333	438.333	436	292.333	163.667	313.333	280.667	0	Hypothalamus_RT
2410004B18Rik		541	621.333	368.667	407.333	209.667	221.5	529.6	556	342.333	317	388	389.667	96.6667	114	178.333	266.667	199.333	232.667	274	251.333	574.333	573.333	0	Brain_CE
2410015M20Rik		835.5	917.667	589	676.667	547.833	695.167	1092.2	1043.8	536.333	571.333	799.333	878.333	981.667	1186	915	1841.33	879.333	1724.67	3114	3470.67	1958.33	2459	0	BAT_CE
2410089E03Rik		1165.5	1496	4072.33	4778.33	268.333	305.167	2568.2	2580.4	906	782.667	514	398.667	232.333	252.667	755.667	891.333	786.667	651.333	542.333	450.333	329.667	451.333	0	Hypothalamus_RT
2410131K14Rik		582.5	743	781	844	212.833	229.667	881.6	815.4	329.667	309	229	222.333	169.333	136.667	283.667	409.667	366.667	454.333	786.333	896	512	662	0	BAT_CE
2510002D24Rik		158.5	185.333	218	280	197.667	225	287.6	280.8	327.667	366.667	342	267.333	205.667	298	154.333	294.333	222.667	184.667	265.667	239	515.333	644.667	0	muscle_CE
2510009E07Rik		1030.5	1412	1216	1376.33	84.1667	123.333	1997.2	1762.6	383.333	349.333	484	342.667	231.333	272.333	630.667	804	706.333	644	444.333	584.667	1909.33	2481.33	0	muscle_CE
2510039O18Rik		491.5	577	402	479	1449.83	1614.5	730.2	715.8	1144.67	1218	1999.67	2011	438.333	494.333	441.333	741.333	592.333	461.667	808	622	1001	1204	0	Ileum_CE
2610002M06Rik		1094.5	1317.67	1418.33	1688.67	679	795.333	1924.2	1750.6	510	496.667	951.333	786	371.333	439.667	339.333	689.667	332.667	303.667	226.667	204.333	438	513	0	Spinalcord_RT
2610008E11Rik		578	664.667	881	986	276.667	387.667	840.2	878.4	827	678.667	674.667	505	364	354.667	628.667	846	614.667	727.333	576.667	450	782.667	1090.33	0	muscle_CE
2610020H08Rik		30	27.3333	70	93.6667	242.667	270	60.4	58.2	274.333	255.667	272.667	249	71	80	360.667	405	376	300.667	296.667	190	16	43	0	VAT_CE
2610044O15Rik8		330.5	400.667	498	571	103.833	132.333	262.6	256.4	377.667	299.333	264.333	185.333	103.333	109.333	296	391.667	284.333	363.333	231.333	302.667	485.667	611.333	0	muscle_CE
2610301B20Rik		602	748	805.333	906.667	186.5	265.333	1094.2	1060.4	149	167	117	90.6667	97	92.3333	210.333	352.333	162.667	239.333	202.333	215	175.333	261.333	0	Spinalcord_RT
2610507B11Rik		6746	7990	6170.33	7250.67	4985	5865.17	10975.4	10066	5101.67	5256	6565	5582.33	5157.67	5298	5711.67	8089.67	7155.67	6948.67	13372.3	12234	38615.3	43715	0	muscle_CE
2700049A03Rik		281.5	326.333	391	458.333	504.333	633.833	277.4	277.8	753	721	537.667	422	199.667	250.667	242.667	363	292.667	315	286	224.667	233.667	351	0	Spleen_CE
2700060E02Rik		748	772.667	515.667	618	666.833	855.5	1216.2	1120.4	687	694.667	1005.67	979.333	491.333	657.333	632.667	1219	709.667	745.333	809	781	5366.33	5512.33	0	muscle_CE
2700062C07Rik		165	169.333	140.333	177.667	106.833	131	228.6	220.8	121	126.667	120.667	102	91	104.333	127.333	243.667	127.333	122.333	166	154.333	101	143.667	0	VAT_CE
2700081O15Rik		612.5	720.333	563.333	634	207.333	305.333	758.4	744.8	324.333	311	306.333	232.667	64.6667	80	1095.33	913.333	1139.67	1000.33	1067	791.667	458	619.333	0	SAT_RT
2700097O09Rik		125	129.667	249.667	304.333	157.833	197.333	177.2	175	259.333	261.667	469	431.667	106.333	115	197.333	296	180.667	271	405.333	270.333	224.333	271	0	Ileum_RT
2810004N23Rik		367.5	407.667	581	680.333	338.333	413.333	353	351.4	781.667	728.333	608.667	525.333	594.333	725.333	664.333	806.333	753.333	964.333	1277	898.667	1328.67	1571.33	0	muscle_CE
2810006K23Rik		153.5	153.333	136	151.667	155.333	201.333	304.4	266.6	141	112.333	100.333	81.6667	125.667	140.333	132.333	144.667	143	135	225	218	398	459.667	0	muscle_CE
2810021J22Rik		224.5	255.667	320.333	384	159.167	208	438.8	400.2	241	184.667	183	149.333	75	57	120.667	239.667	98.3333	138.333	220	184.333	104.667	133.667	0	Spinalcord_RT
2810403A07Rik		918	1276.67	1293.67	1421	1613.83	1795.17	1615.6	1554	2269	2214.33	2378.33	2174	924.667	1042	1276	2242	1164.33	1679.33	1652.67	1618	1409.67	2241.33	0	Ileum_RT
2810428I15Rik		581.5	630	323	362	292.333	351.333	743.6	752	260	298.667	331	345	358.333	390	550.667	657.667	697	856.667	956	1261.33	1955	1868.33	0	muscle_RT
2810474O19Rik		345.5	431.667	713.667	756.333	2673	2786.5	431	373.8	3362.67	3282.33	3215.67	2869.33	813.333	1233.67	1875.67	1980	1859	1858.67	1344.33	2008.67	508	686.333	0	Spleen_CE
2900026A02Rik		794	913.333	802	822.333	215.333	351.667	696	654.8	448.333	437	12325.7	8891	1907	1462.33	737.333	991	698.333	444.333	521.333	479.333	3236.33	3122.67	0	Ileum_RT
3110001I22Rik		31.5	51.6667	68	79.3333	104.167	123.5	42	52.8	220.333	206.667	183	170	61	74.3333	68	107	92.3333	125	290.667	123.667	41	69	0	BAT_RT
3110002H16Rik		645	733.333	630.333	773.333	1629.67	2145.83	1081.2	989.2	1201.33	1271.67	948.333	814	447.333	495.667	525.333	814.667	640.333	786	907.333	746	587.333	752.333	0	Bonemarrow_CE
3110009E18Rik		23	27.3333	26.6667	31.6667	26.5	30.5	21.4	21.8	68.3333	66.6667	39.3333	28.3333	7.33333	8.33333	39.3333	42.6667	39.3333	35.3333	25.3333	25.3333	41	45.6667	0	Spleen_CE
3110040N11Rik		106	120.333	122.667	152.333	129	149.333	156.6	157.8	186	162.667	176.333	178.667	113.667	160	160	225.667	154.333	185.333	172.667	171.667	378.667	430.667	0	muscle_CE
3110043O21Rik		603.5	763	665	758.667	256.333	285.167	1383.8	1282.4	545	522.333	412	375.333	257.333	281.333	1657.33	1587.33	1606.67	1459.33	752.667	466.667	776	905.667	0	VAT_RT
3110062M04Rik		34	41.6667	66.6667	67	422.833	510	198.2	175.8	232.333	188.667	122	101	55	59	130	143.333	146.333	179	142	130	222.667	282.333	0	Bonemarrow_CE
3110070M22Rik		29	23	17.3333	27.6667	7.66667	10	22.4	24.2	7	9.66667	15	9.66667	5.66667	6	10	15.3333	10.3333	5	15.6667	18	10.6667	7.33333	0	Brain_RT
3110082I17Rik		90	99.3333	96	108.667	163.5	196	142.8	144.6	82	119.667	91.6667	81	72.3333	150	55.6667	115.333	73.3333	71.3333	59.3333	60.6667	260.667	337	0	muscle_CE
3830406C13Rik		335.5	374	335.333	407.333	258.667	302.833	751.8	616.6	396.333	340.667	574	471.667	165.333	190.333	419.333	652.333	373.333	502.333	487.667	530	430.667	485	0	Spinalcord_RT
4833420G17Rik		473.5	610.667	740.333	861	1394.33	1604.5	965.2	890.4	1432.33	1355.67	1202.67	1005.67	463.667	536.667	557	778.333	633.333	648	502	409.333	634	794.667	0	Bonemarrow_CE
4833439L19Rik		2238.5	2478	1566	1904.67	1143.67	1364.83	3976.6	3760.4	768.333	763.667	3144.33	2926.67	1119.33	1220	1250	1886.67	1346	1657.67	3226	3901.67	15584	15553.3	0	muscle_RT
4921507P07Rik		21	19.3333	52.6667	70.6667	35.8333	35.8333	36.2	32.2	35.3333	33.6667	19	18.3333	20.3333	23	48	100.667	49	43.6667	61.6667	37	37.3333	47.3333	0	VAT_CE
4921524J17Rik		125.5	150	75	92	135.333	161.167	74.2	85.2	113.333	126	96.3333	75.6667	67.3333	90.6667	93.6667	119.333	85.3333	89.6667	86	78	430	545.333	0	muscle_CE
4930402H24Rik		2283	2588.33	4131	4830	340.167	379.167	5736.8	4999.6	906.333	798	1268	931.667	1401	1433.67	2468	3015.67	2992.67	3095.33	4412	5245.67	233.667	606.333	0	Spinalcord_RT
4930430F08Rik		285	287	264.333	306.667	246.333	322.333	474.6	463.8	153	181.667	73	75.6667	90	82.6667	96	160	98.6667	138.667	202	266.667	283.333	326.333	0	Spinalcord_RT
4930451G09Rik		43.5	42	108.667	134.333	33.1667	36.5	149.4	118.8	39.6667	30.6667	17.6667	12	9.66667	8.66667	20	44	19	17.6667	42.6667	32.3333	29.3333	52	0	Spinalcord_RT
4930453N24Rik		544	637	582.667	657.333	363.333	435.167	334.8	298.4	954.667	915	769.667	670.667	606.333	623	669	966.333	661	1184	1301.67	1512.33	3171.33	3336	0	muscle_CE
4930503L19Rik		152	166.667	229.667	244.667	458	573.667	331.8	331.2	549.333	569.667	222	168	44.6667	63.3333	213.667	233.667	203.333	253.333	136	136	103	156.333	0	Bonemarrow_CE
4930523C07Rik		49.5	64	69.3333	82.6667	1604.67	1912.33	71.2	71.2	3979.67	3476	498.667	305.333	302	294.667	1042	743.333	1133.67	1096.33	930.333	778	214.667	384.333	0	Spleen_CE
4930579G24Rik		26	33.3333	24	25.3333	487	631	94	94.4	102.667	115.667	60	41.6667	27.3333	16.3333	24.6667	35.3333	37	28	47.3333	36	60	87.3333	0	Bonemarrow_CE
4931406C07Rik		173.5	187	190.667	244	313.833	391.833	1003.8	911.2	218.667	210	2153.33	1824	2780	1771.33	1010.33	1216	1185.33	2137.33	2929	4331	397	1312.67	0	BAT_CE
4931406P16Rik		959.5	1102	1369.33	1559	1023.67	1245.67	2038.2	1854.2	1547.67	1550.67	1003.33	773.667	454.667	573.667	2398.33	1679.67	2066.33	1153.33	2582.33	1353	2224	2872	0	muscle_CE
4931414P19Rik		71.5	79.6667	61	76.6667	128.667	171.333	95.8	89.4	103.333	98	114.667	80.3333	76.3333	67.6667	88.3333	92.3333	79.6667	68.3333	94	98.3333	192.667	185.667	0	muscle_RT
4931428F04Rik		204	226.333	180	234	82.3333	108.333	736.4	683	49.6667	48	36.3333	30	25.3333	25.3333	25	43.3333	23.3333	34.3333	27.3333	38.3333	50.6667	85.6667	0	Spinalcord_RT
4932438A13Rik		4527.5	5694.33	7911.67	9139.33	3439.67	3589.33	5573.8	5465.2	6820.67	6186.67	13773.7	13094.7	4963	4415.33	3914.33	5155.33	3629	3684	3438.67	2796	3175.67	3883	0	Ileum_RT
4933427D14Rik		369	511	1027.67	1183.33	324.333	383	970	913.6	396	394	580.333	477.333	109	98	281	445.333	269.333	228.667	163	138.333	146.333	166.333	0	Hypothalamus_RT
4933434E20Rik		795	887	963	1096.33	413.833	449.333	1014.8	1001.2	1010.33	934	920	815.667	429	498	688	1097.67	670	840.667	818	824.333	3464	3616	0	muscle_CE
5031439G07Rik		2360	2860.67	5906.67	6994.33	2466.33	2574.67	9641.2	9363.8	3374.33	3106.67	1511.33	1071.67	919.667	1029	951	1427.67	1496.67	1301.67	2509	2919.67	10653.3	11332.3	0	muscle_CE
5730409E04Rik		1463	1660	798.667	1084	41.5	50.6667	3671.2	3445.6	135.333	119.667	70.6667	54.3333	87.6667	107.333	377.667	371.667	354.667	276	240	239.667	1608	1693.33	0	Spinalcord_RT
5730455P16Rik		1432.5	1598	1552	1879.67	326.667	421	2711.6	2687.6	418	384	419.667	309.333	438.333	447.667	609.333	695	574	633	830.667	986.333	3582.33	4337.67	0	muscle_CE
5730480H06Rik		142	171	372.667	409	22	25.6667	52.2	45.4	392.667	355.333	418.667	334	156	140.667	282.333	445.333	216	248	171.667	149	39.3333	28.3333	0	VAT_CE
5730508B09Rik		45.5	53.3333	20	23	988	1167.17	41.8	43.2	363	492	241.667	203.667	39	45.3333	307.667	414.667	240	554.333	304.667	393.667	76	112	0	Bonemarrow_CE
6030458C11Rik		582.5	738.667	484	606.667	1036.33	1345	895	826.2	694.333	741.333	674.667	513.333	364	367.667	262	401.667	288	323.667	390	357.667	1868	2033	0	muscle_CE
6330408A02Rik		246	290.333	441.333	513.667	79.8333	100.667	640.6	582.6	287.667	261.333	236.667	201	81.6667	84	197	286.667	237.333	225.667	203	199.333	1064.67	989	0	muscle_RT
6430548M08Rik		6493.5	7509.33	5013.67	6060.67	3983.17	3833	8864.4	8541	970.667	1056.33	597	564.667	140.667	204.333	239.667	594	280.667	208	218.667	219.667	1201	1749.33	0	Spinalcord_RT
6430550D23Rik		7.5	11	57.6667	78	5.83333	10.5	41.2	31.6	65.3333	57.3333	74.6667	61.3333	46.6667	51.3333	70.6667	99	65.3333	130.333	130	164.667	7	16	0	BAT_CE
8030462N17Rik		927	1217.67	802.667	886	723.667	891.667	915	900.4	810.667	847.667	603	539.667	277.333	318	333.333	475	396	459.667	590.333	579.667	1200.67	1630.67	0	muscle_CE
8430408G22Rik		17	24.6667	30.3333	22	27.5	73.6667	25	49.2	59	47.3333	50	39.6667	1277.33	1813.67	199.667	282.667	265.667	272.333	449.333	728.333	162	173.667	0	Liver_CE
9030617O03Rik		185	195.333	227.333	255.333	375	345	467.4	453.8	349.333	303	788.667	669	862.333	844	230.667	302	495	410.667	693.333	756	1627.33	1755.67	0	muscle_CE
9030624J02Rik		1718	1920.33	1776.33	2070.67	1418.5	1654.33	2304.4	2196.4	1559	1564	1629.67	1302	625.667	720.333	866	1170.67	1137.33	905.667	1179.67	1193.67	1482.67	1498.33	0	Spinalcord_RT
9130011E15Rik		440.5	465	351	420.333	251.833	297	648.6	623.8	304.667	250	500.667	388	169.333	140.667	268.667	271.667	264.667	234.333	303.333	256	891	949.333	0	muscle_CE
9130019O22Rik		84.5	87.3333	113.667	130.667	63	77.5	91.8	78.6	177	181.667	245.333	232.333	45	50.6667	70.6667	143.667	88.3333	85	87.3333	64	110.333	126.667	0	Ileum_RT
9130023H24Rik		76.5	81.6667	78.6667	100	167.333	193.833	169	146.8	168	160	209.667	186.667	79.6667	98	122.333	199.333	136.333	140.333	181.333	150	114	135.667	0	Ileum_RT
9130401M01Rik		659	736	417.667	467.667	229.667	251.5	588.2	583.2	339	313.333	185	161.333	234.667	277.667	291.667	434.333	362	403	437	464.667	666	667.667	0	Brain_CE
9430015G10Rik		204	228	364	456.333	632.5	839.833	572.8	498	567	510.333	346	332.667	88.3333	102	124.667	315.333	155	189.667	88.6667	86.6667	187.333	252.333	0	Bonemarrow_CE
9430020K01Rik		2691	3317.67	904.333	1123.33	314.833	465.5	2576.6	2223.2	478.333	456.667	171.333	140.667	229.667	256.333	1167	1330.33	1229	909.333	1316.67	1196	1641.67	2150	0	Brain_CE
9430038I01Rik		34.5	42	50.6667	65.3333	81.8333	91.3333	56.8	57.4	179.667	170.333	437.333	473.333	103.333	121	153.667	184	169	155	120.333	111	125.333	172.667	0	Ileum_CE
9530068E07Rik		1552	1758.67	1349.67	1661	2831.5	2878.67	2950	2801.8	1498.33	1450.67	1686	1263	2409.67	2538	1618.67	1965.33	1723	1140.67	1740.67	1450.33	3527.33	4129	0	muscle_CE
9530077C05Rik		166.5	222.333	316.667	350.333	137.333	170.667	344	350.8	79	89	88.3333	54.6667	20.3333	16	94	96.6667	57.6667	36.6667	23	17.6667	7	13	0	Spinalcord_CE
9930012K11Rik		37	30.3333	66.3333	87.6667	78.8333	79.5	157.8	134.8	89.3333	89.3333	58.3333	57	9.33333	12.6667	27	36.3333	28.3333	24.3333	10.3333	22	7.33333	10	0	Spinalcord_RT
9930021J03Rik		1616	1885	1830	2177	856.167	976	1719.2	1491.4	1089.67	1005.33	1771	1532.33	620.333	679.333	685.667	1043.33	680.667	834	868.667	736	1189	1522.67	0	Hypothalamus_RT
9930111J21Rik1		8	8	9.33333	13	149.333	149.667	14	10.6	648	549.333	96	57.3333	13.3333	16	55.6667	54	114.667	123.333	47.3333	50	26.6667	57	0	Spleen_CE
A130010J15Rik		111	122	125.667	147	132.667	168	192	173.8	306.333	258.333	351.667	356.667	136	152.667	86.6667	155.667	123	129.667	115.667	95.3333	305	369	0	muscle_CE
A230050P20Rik		448	505.333	1257	1561	136.833	160	1735	1710	482.667	493.333	207	136	1085	1172.33	153	462	244.333	239.667	100.667	93	96.3333	122.333	0	Spinalcord_RT
A430005L14Rik		241	253.667	158	185.333	541.5	686.333	361.6	396.6	266.667	316.333	259	291	328.333	327	114	194.333	143	158.667	164	204.667	812.667	940.333	0	muscle_CE
A430033K04Rik		356	468.333	637	771.333	153.667	192.667	386.6	359	260	236	280	214.333	147	152.667	170	244.667	186.333	167.333	229	122	169.333	193	0	Hypothalamus_RT
A430105I19Rik		195.5	181	294	380	37.6667	55.1667	543.6	449	352.333	295.667	447.333	377	73	92.6667	1368	884.333	550	423	299.667	349	1684	1864.67	0	muscle_CE
A4galt		74.5	80.6667	62	75.3333	27.8333	49.5	128.8	86.8	413.667	380.667	205.667	143.667	6.33333	8.33333	218.667	252	331.667	164	64.6667	70	135	196.333	0	Spleen_CE
A630001G21Rik		5	7.33333	13	11	917.833	965.5	23.4	24	1178.33	942.333	191	89.6667	12.6667	13.3333	62.3333	58	168	207.333	20.6667	22.6667	17.3333	30	0	Spleen_CE
A830010M20Rik		157	171.333	222	258	193.167	272.167	1868.8	1738.2	71.3333	59	52	32.3333	44	34.6667	107.667	90	107.667	79.3333	76.6667	49	645	688	0	Spinalcord_RT
A830080D01Rik		185.5	206.333	296	343	403.333	467	277.4	259.2	558.333	486	506	442	64.6667	73.3333	271	412	234.333	293	227.667	174	49	69	0	Spleen_CE
A930004D18Rik		81	88.3333	109.333	121.333	5	6	164.8	153.8	31.3333	28.6667	11.6667	13	37.3333	44	59	55.6667	62	47.3333	57.6667	40	12.3333	14.3333	0	Spinalcord_RT
AA986860		55	61	71	77.6667	170.833	207.333	158.8	155.4	54.3333	84	3066	3139.33	49.3333	35	70	64.3333	43	41	78.3333	44	16.3333	22.3333	0	Ileum_CE
Aaas		243.5	299.333	185	215.667	936.667	1214.17	440.6	398.4	486	495.333	292.333	237	157.667	159.667	116.667	166.667	127.667	127.333	145.333	133.333	386.333	452.667	0	Bonemarrow_CE
Aacs	lipid_GO	1017	1252.67	780.667	926	939.167	954.5	1492	1537	593.667	542.333	2202.67	2221	955	1678	3421	9247	4584.67	8542.67	6155.33	17477.7	358	2083.33	0	BAT_CE
Aaed1		274.5	318	328.667	372.333	217.833	254.5	161	176.8	845	840.333	866.333	754	1605	1968.67	992.333	1344.33	1057.67	1208.33	2001	2101.67	766.667	1040.67	0	BAT_CE
Aagab		2285	2434	1131	1323	1426.33	1663.83	1639	1599.8	1215.67	1205	1185.67	1104	758.667	816	712.667	974.333	838.667	721.333	771	803.667	1126.67	1217.67	0	Brain_CE
Aak1		4783	6561	6596.67	7048.33	1487.83	1797.17	13601.6	12812.2	1880.67	1536	2097	1565	723.667	548.667	1039.67	1293	1248	1173.33	1096	1128.33	2229	3025	0	Spinalcord_RT
Aamdc		392.5	443.667	338	400	106.333	134.167	838	789.2	161.333	160	943.667	942	247.667	290	539.667	756	518	717.667	966.333	892.667	4570	4978	0	muscle_CE
Aamp		4077.5	4163.67	2341	2777.33	1702.33	1973.33	4382.6	4479.2	1635	1744.33	1946	1920	1918	2649.67	1723.67	2356	1918.67	1475.33	2283	2032.67	4676.67	5097.33	0	muscle_CE
Aar2		1226.5	1327.67	742.667	820	453.833	542.167	1358.8	1329.8	518	537.333	568.333	525.667	428.333	504.333	321.333	437.333	448.667	344.667	504.333	610	1803	1775.67	0	muscle_RT
Aars		5306	6163	3192.67	3878	3488.5	4861.83	7316.8	7735.2	2168.67	2455.67	2582.33	2134	6442	6544	1421.33	2594	1430.33	1190.33	1977.33	1940.33	7787.67	8141.33	0	muscle_CE
Aars2		695.5	682	455.667	605.333	266.167	328.5	939.8	972.4	281	295.333	328	287	463.333	519.667	166.667	261.333	265.333	324.333	875	1196.67	1390	1411.67	0	muscle_CE
Aarsd1		1201	1287.33	781.667	922.333	698.5	850.5	1258.6	1353	425	520.333	354.667	359	420.667	499.667	429.333	635.333	497.667	521	656.333	552	1982	2082.33	0	muscle_CE
Aasdh	lipid_GO	215.5	247.667	470.333	564.667	214.833	280.667	483.6	452.2	518.333	492	356.333	279.667	303.667	313.667	353	516	373.667	406.667	410.333	364	415.333	528.667	0	Hypothalamus_RT
Aasdhppt		647	835	562.667	569.333	345.833	400.833	647.6	623.2	401.667	389.667	389.667	364	581.667	638	479.333	827.333	408.333	719	771.333	734.667	727.333	852.667	0	muscle_CE
Aatf		433	526.667	427	504.667	420	519.5	400.2	386.2	717	699.667	559.333	472.667	300.667	354.333	266	432.667	354.333	359.333	381.667	395	481	565.333	0	Spleen_CE
Aatk		5411.5	5841.33	7153.67	8533.33	873.667	874	17163.6	16597.8	196.333	228.667	85.3333	67.6667	114.667	127.667	403.333	363.667	785.667	773.333	1162.67	1313.67	236.333	339	0	Spinalcord_RT
AB124611		11.5	10	17	23	2758.67	2514.67	14	19.4	1514.67	1524	58.6667	26.6667	30.6667	46.3333	94.3333	72.6667	157.667	179	30.6667	23	26.6667	53.3333	0	Bonemarrow_RT
Abat		8901.5	9704.33	11286.7	13765.7	124.167	178	21506.6	19988.2	455	437.333	4334.67	3344.33	9830.33	9953.33	603.667	601	295	117	90.3333	50.6667	151.667	212.333	0	Spinalcord_RT
Abca1		1397	1909.33	2255.33	2535.33	826.833	947.667	1586.8	1550	4630	4809	1805.67	1031	8995.33	10750.3	9784.33	10745	11218	5599	7629	5816	1215.33	1451.33	0	SAT_RT
Abca2		6686.5	7456.33	6606.67	7943.67	1518.83	1528.67	25592.8	23387	1094	1061	391	278.667	2004.33	1705.67	1333	5716	1610.67	1435.33	2691.33	2487.33	2238.67	2847.67	0	Spinalcord_RT
Abca3		2073.5	2601.33	2865	3232	2362	3128.33	3767.8	3732.6	2357.67	2553.33	1765.67	1296.33	2701	2089	1751.67	2235.67	1431.67	924	868.333	671	997	1329	0	Spinalcord_RT
Abca5		1987.5	2519	2104.33	2386.67	42	42.3333	2719.6	2559.8	152	138.667	191.333	130.667	212	237.333	546.667	822.333	393	314	367	271.333	698.333	774	0	Spinalcord_RT
Abca6		83	93	117.333	131.667	66.5	58.3333	280.6	277	75.3333	61.3333	29.6667	17	7026	7839.33	572.667	560.667	849	427	282.667	161	300.333	464	0	Liver_CE
Abca7		649.5	735	692.333	737	6747.17	7156	2126.2	2169.4	2609.67	2857.33	2174.33	2081	244.667	275.333	406.667	464.667	661.667	968	938	1217	1235.67	1611.33	0	Bonemarrow_CE
Abca8a		258.5	288.667	301.333	368.333	71.5	80	474.8	454	415	335.333	505.667	315.333	2387	4065	1781.33	2469.67	2329	1761	2491.33	1568.33	2603.67	4102.33	0	muscle_CE
Abca8b		995.5	1077	837.667	975.333	7.66667	11.1667	813.2	770.4	103.667	91	194	134	2197.33	2555	526.333	632.333	518.333	380	467.333	369.333	1688.33	2363	0	Liver_CE
Abca9		314.5	427.333	346.667	359.333	503	494	420.2	379.2	1089.67	1053.67	317	204.333	152.667	200.667	1176.33	1268.67	1829.33	1345.67	730.667	626.667	885	1497.33	0	SAT_RT
Abcb10		730.5	797.667	878	1006	10168.7	14280.5	1725	1625.8	2482.67	3582.33	1586.67	1426.67	1058.67	1155.67	393.333	756.333	444	572	1230.67	1101.67	1479	1854.33	0	Bonemarrow_CE
Abcb1a		626	729	542.667	650.667	22.6667	20.8333	1244.8	1083.8	414.333	416	14479.3	9983.67	34.3333	43.3333	237.667	283.333	252	155.333	115	96.3333	490	570	0	Ileum_RT
Abcb1b		51	54	61.3333	79	146.333	157.833	132.8	120	241.667	243.333	86.3333	59.3333	35.3333	47.6667	329	331.667	254	235.667	200	263	432.667	567	0	muscle_CE
Abcb4		95	135.667	145	191.667	2970.33	4422.17	222.4	197.4	1467.67	2206.33	16	10.3333	9228.67	8511	36	41.6667	88	82.3333	348	243	10382	11608.7	0	muscle_CE
Abcb6		371.5	463.333	513.667	622	1773.17	2500.5	697.6	636.4	616.667	914.333	936.333	797.667	1804.33	2074.33	346.667	484.333	421	403	883.333	655	1879.67	2055.33	0	Bonemarrow_CE
Abcb7		1362	1538.33	1128.67	1336.33	1588.33	1951.33	1526.8	1447.6	1375.67	1279	2269.67	2087.33	1320	1391.67	517.333	1004	567	910.333	1141	1409.67	2866.67	3508	0	muscle_CE
Abcb8		890.5	887.667	862	1045	420	546	1634.6	1580.8	383.667	441.667	948	798.333	617.333	700.333	700.333	943.667	843.667	1166.67	3022.33	3129	2568.67	2848.33	0	BAT_CE
Abcb9		976	1090.67	666.333	713	294.667	365.667	1845.4	1886.4	213	253	180	154.667	56.3333	55.6667	238.667	693.667	317.333	330.667	624.333	528	663.333	811.667	0	Spinalcord_CE
Abcc1		688.5	792	833	911.333	915	1006.83	961.8	914	1563.33	1432.33	818.333	654.667	83.6667	89.6667	1579.33	2359.33	2130.33	1562	1471.67	1261.33	2804	3309.33	0	muscle_CE
Abcc10		137	155	296.333	326	128.333	153.333	577	533.8	229	187.333	654.333	510	231	160.333	198.667	235	208.333	250	441.333	345.667	205	297.333	0	Ileum_RT
Abcc3		57	67	46.6667	57.3333	343.333	485.667	82.2	70.6	1733.67	1995	4312	2422.33	5727	6003	312.667	877.667	285.667	109.333	51.6667	37.3333	26.3333	73.6667	0	Liver_CE
Abcc4		307.5	330.667	349.667	418.667	1305.83	1455.33	514	405.8	700.333	714	388	280.333	76.3333	83.3333	223.333	928	360.667	340	846.333	656.333	1237.33	1381.33	0	Bonemarrow_CE
Abcc5		2220	2770.67	4466.33	5135	1867.5	2144.67	6610.8	6574.6	1605.67	1653.67	804.667	656.667	145	168	1627.67	1724.33	1756.33	2457.67	1065	1226.67	4090	4887.67	0	Spinalcord_RT
Abcc9		211.5	261	265	300.333	190.5	352.833	546.8	459.6	931.667	799.333	792.333	549.667	763	893	582.667	832.333	1346	790.667	1734.67	1705.67	15969	17668	0	muscle_CE
Abcd1	lipid_GO	204	244.333	289.333	330.333	1856.67	1948.5	558.8	509	1058	992	1071.67	949	402.333	423	319	338	541.333	480.333	690.333	636.667	2146	2284.67	0	muscle_CE
Abcd2	lipid_GO	1268	1410	670.667	797	1265.83	1245.17	2118.2	2146.4	294.333	316.333	103.667	119.333	132.667	188	13981.3	11957	12290	9900.67	3280.33	1601	3047.33	4488.33	0	VAT_RT
Abcd3	lipid_GO	2100.5	2318	1506.67	1921	645.333	773	3139.6	2864	621.667	601.667	6488.33	6001.33	16215.7	16539.7	1606	2630.33	1636.67	3292.33	10637.7	9936.33	3722	5012.67	0	Liver_CE
Abcd4	lipid_GO	135	168.667	272	313.333	168.833	189.167	669.6	625.2	238.333	222	626	532.333	190.333	178.333	229	268	297	420.333	704	656	425.333	566	0	BAT_RT
Abce1		2184.5	2516	1800.33	2100	2464.83	3160	2785	2508.8	3288.67	3230	2764	2706.67	2090.67	2518.33	1647	2306.67	1611.33	2288	2538.67	2125.67	3310.67	4059.33	0	muscle_CE
Abcf1		1409.5	1612.67	1129	1354	2777.5	3515.83	2557	2650.8	1668	1884.33	2056	1837	1024.67	1195.67	890.667	1028.67	1105.33	830.333	1409.33	1290.33	6673.67	6675.67	0	muscle_CE
Abcf2		2221	2586	1251.67	1425.67	1334.67	1663.83	2940.8	2996.2	1012.33	1041	778.333	684	774.333	847	520.667	741.333	623.667	521.667	978	937.333	8543	8403.33	0	muscle_RT
Abcf3		1832	2063.33	1547	1827.33	895.167	1031.83	2866.6	2923.4	1025.33	1070.33	1109	1020	885.333	1155	645	1077.33	783	708.667	1140	1017.67	3353.67	3607	0	muscle_CE
Abcg1		2069	2358	1547.67	1707.33	907	866	2237	2343.8	2294	2259	217	139	149	197.667	389.333	412.667	714.667	416.333	269.333	301.667	55.3333	95	0	Brain_CE
Abcg2		445	448.333	353	398	2285	3147.83	857	697.4	1096.33	1511.67	11796.7	11652.3	2550.33	3141.33	4551.67	712	424.333	521.333	421.333	529	1149.67	1371	0	Ileum_RT
Abcg3		8	12.6667	8	12	470.5	575	12.2	14.4	4141.67	3746	307.667	208.667	73	104.667	88.3333	107	194.333	294	31.3333	44.3333	20	43.6667	0	Spleen_CE
Abhd10		351	427.667	427.333	489.333	327.167	375.833	834.6	727.6	255.333	228.333	244	192	108.333	122	186	259	187	209.333	236	261	481.333	588	0	Spinalcord_RT
Abhd11		442.5	463.667	357	399.667	434.667	496.167	725.4	669.2	325.667	342.667	1538	1606.33	563.667	647.333	482	781.333	493	665	1303.67	1243.33	2097.67	2331.67	0	muscle_CE
Abhd12		6070.5	7057.67	3421	4143.33	734.5	869	8180.6	7903.8	1368.33	1336.33	2680.33	2633.67	653	773.333	1528.67	2723	1601.33	1346	1606.33	1315	1455	1663	0	Spinalcord_RT
Abhd13		1124	1313.33	766	936.333	830.833	888	1002.6	886.6	1062	995.667	1989	1828.67	625.667	678.333	661.667	1122.33	728.333	816.333	914	906.667	618.667	797	0	Ileum_RT
Abhd14a		395	424	279	313.333	117	137.833	693.6	650	97.3333	92.3333	241	208.333	169.667	196.333	165.667	199.333	164.333	140	178	144.333	786.333	766.667	0	muscle_RT
Abhd14b		177	182	418	447.667	105.667	115.5	741.8	640.4	174.333	160.333	579	512.667	2228.67	3016.33	670.333	1006.67	595.667	545.667	474	545	359.333	548.333	0	Liver_CE
Abhd15		11	16	21.6667	27	298.167	282	58.8	59.4	85.3333	80.6667	52.6667	41	463	449.667	457.333	452.333	492	388.667	771.667	450.667	33	93.6667	0	BAT_RT
Abhd16a		1890.5	1994.67	1118	1348.67	1580.5	2044	2374.6	2181	944.667	1137.67	703.333	590	587.333	757	1181.67	1709	1324	1113	1384	1066.67	5410	4363	0	muscle_RT
Abhd2	lipid_GO	3057	3651.33	1893	2217.33	966.167	970.333	1121.4	1054	2601.33	2381.33	11569.3	9693	2263.67	1990.67	2764.67	16168.7	1367	758	598.667	553.333	122.667	231.667	0	VAT_CE
Abhd4		1600.5	1551	1087	1268.33	1071.67	1413.67	4589.4	3988.6	610.333	666.667	1056.67	1004.33	768.667	822	727	1112	920.667	832.333	1877.33	1724.33	1427	1726.67	0	Spinalcord_RT
Abhd5	lipid_GO	429	509.333	345	396.667	1894.67	1922.5	1150.6	1032	371.667	470.333	716.667	741.667	995.333	987.333	3060	3365.33	2964.67	3233.33	3699	3705.33	2099.67	2596.33	0	BAT_CE
Abhd6	marker_Ther	625.5	723	274	331.667	30.1667	39.1667	1332	1356.2	144.333	120.333	1185.67	1050.67	740	595.333	183	261.333	237	336	673	680.333	266.333	421.667	0	Spinalcord_CE
Abhd8		5078.5	5514	3323.67	3543.33	257.833	340.833	4776.4	5097.6	531.667	568.333	154.667	128.667	123.333	130.667	101	233.333	149.333	166.333	105.667	202.667	966	991.333	0	Brain_CE
Abi1		2190	2682	1448.33	1693.33	2362.33	2526.67	2260.2	2067.4	2628	2281.33	3396.33	3005	688.667	797	1262.33	1539	1210	1298.67	1033.67	914.667	725.333	999.333	0	Ileum_RT
Abi2		4333	5613.33	3448.33	4097.67	219.5	274.167	2856.6	2699	447	385.667	848.333	608.667	238	217.667	799.333	917.333	585.667	450.667	462.333	339.333	253.667	312.667	0	Brain_CE
Abi3		18.5	19	11	15	362.5	429.667	110.6	113	325.333	309.333	140	98	22.6667	25	30	30.6667	47.6667	63.6667	100.333	56.6667	107.667	156	0	Bonemarrow_CE
Abi3bp		163.5	171	50	50	89.8333	134.833	172.4	137.4	409	317.333	695	476	100	108.333	837.333	634.333	1008	677.667	237	125.333	969.333	1368.67	0	muscle_CE
Abl1		950	1123.67	1411.33	1659.33	1767.17	2112.17	3111.8	2960.2	2642.67	2487.67	2874.33	2305.33	762.667	723	1171	1425	1530.33	1192	1149.33	1119.33	2884.33	3684	0	muscle_CE
Abl2		1461	1861.67	1865.33	2110.33	776.333	981.333	2209.4	2127.4	1892	1716.67	982	735	440	423.667	683.667	1024	993	853.333	805	723.667	1915	2334.33	0	muscle_CE
Ablim1		2263	2821.33	2163	2495.33	1724.67	2504	3837.2	3710.4	6676.67	5460	2700.67	1846.33	1106.67	999	2761.67	3143	3903	3567.33	4235.33	4224.67	2400	3386.33	0	Spleen_CE
Ablim2		1710.5	1937.67	1668.33	2014.33	5.16667	6.83333	4326	4097.4	74.6667	72.6667	184.667	106	53.3333	65	388.667	401	251.667	216.667	180.667	156	2764	2487	0	Spinalcord_RT
Abr		7730.5	9323.67	8771.67	10074.3	2670.5	2624.67	11500.2	11320.6	2128.67	2054.67	9206.67	7810.67	146	161	597	1251.67	516.667	500.667	397	509.667	687	822.333	0	Spinalcord_RT
Abracl		84.5	114.667	48	61.6667	888.333	912	124.6	140.4	644	547	760	659	54	77	335	1056	245.667	305.333	174.667	134.333	50	114.333	0	VAT_CE
Abt1		313.5	384.333	240.667	261.333	255.667	309.167	403.6	405.6	252	269.333	214.333	188.333	188.333	208	145.333	199.667	165.667	156	256.333	239.333	470.333	562.333	0	muscle_CE
Abtb1		657.5	670.667	490.333	562.667	3288.17	3632.33	872.4	837	837.667	921.667	583.667	515.667	406	510.667	372.667	529	423.333	413.333	435.667	412.667	1378	1346.33	0	Bonemarrow_CE
Abtb2		376.5	407.667	428	503.333	442.667	425.667	990.6	939.8	428	401.333	120.333	92	962.333	773.333	44.3333	47.6667	109	130.667	233.667	199.333	973.333	1021.67	0	muscle_CE
Acaa1a	lipid_GO	670	660	899	1012	575.667	627	1247	1268.2	799.333	780.667	2192.33	1967	2126.33	2453.33	1013.33	1536.33	1327	1526.67	2186.67	1626.67	2073.33	2239	0	Liver_CE
Acaa2	marker_Ther	589.5	654	362	382.667	932.167	1193	744.2	698.4	709.333	800.333	1669	1246.33	16046	19569.7	1560.67	2024.33	2285.33	6033	45261.3	30405.3	8726.67	10970.3	0	BAT_RT
Acaca	lipid_GO	1330.5	1593.33	1760.67	2043.33	343.167	363.333	1756.6	1616.4	665.667	615	1338.67	1556	1564	1548	5594.67	15911.7	13687.3	25973.3	28078.7	61453	1645.67	10430.3	0	BAT_CE
Acacb	lipid_GO	145.5	156.333	245.333	294.333	27.1667	37	613.2	556	383.667	330.333	545.333	397.667	3470.67	2990	5130	9939.33	9343.67	19528.7	40499.3	70308.3	26624.7	30071.7	0	BAT_CE
Acad10		64.5	69.6667	130.333	123.333	72.1667	85.6667	114.4	109	191.333	176.333	218	164	484.667	592.333	286.667	440.333	360	410	1245	814	207	360.667	0	BAT_RT
Acad11	lipid_GO	637.5	782	465	522.667	608.333	627.333	1216.2	1129.4	327.667	309.333	1701.67	1641.33	7168.67	8666.33	2109.33	3299	2532	3379.33	8430.33	9466.33	4084	5194.33	0	BAT_CE
Acad12		71.5	74.6667	75.3333	79	49.6667	51	106.4	96.4	107.667	96	137	135.667	182	188	294.333	370.667	395	299.333	1164.67	791	1246.33	1325.67	0	muscle_CE
Acad8		574	640.333	404	453	329	357.333	722	714.4	248.667	241.667	538	487	1200	1423.33	605.333	1251.67	692.667	746.667	1793.67	1878.67	1848	2158.33	0	muscle_CE
Acad9	lipid_GO	914.5	1074.67	818	953	506.167	615.333	1450.2	1397	710.333	651.667	973.667	928.333	766.333	894.333	776.667	1205.33	921.333	992	1645	1902.33	2016	2403.67	0	muscle_CE
Acadl	lipid_GO	589	583	307.333	411	2022.67	2519.5	1909.4	1756.8	701.667	738	1631.33	1274.67	2147.67	2249.33	1697	2135.33	3177.67	6634.33	31114.7	29289.3	13226.3	17725.3	0	BAT_RT
Acadm	lipid_GO	677.5	731	590.333	681	773	924.5	963.8	935.8	780	775	2337.33	2325.67	4258	5395.67	3828.33	4649.67	5020	9394.33	43877.3	37799	15118	18740.7	0	BAT_RT
Acads	marker_Ther	239	232.667	176.333	193.333	529.5	663.167	396.6	364.6	398	430.667	1776.67	1543	3338	3675.33	1386	1587.33	2151	2872.33	10044	9223	4245	4930.67	0	BAT_RT
Acadsb	lipid_GO	1418	1609.67	2045.67	2378.67	583.333	563	2119.8	2026.4	728.333	631.667	696.333	548	3498.67	3954	5023.33	5946.67	4384.67	4551.67	6028	5073	4981.33	5564	0	BAT_RT
Acadvl	lipid_GO	637	687.667	591	644.667	1195.83	1514.67	2235.6	2159.8	516.667	550.333	1504	1379.67	4089.67	4804	1116	1718	2021.67	5043	26223.3	27530	19653	25630.7	0	BAT_CE
Acap2		2060	2392.67	1652.33	1979.33	2534.5	2489.5	3294.2	2942	2696.67	2439.33	2944.67	2701.33	572.333	669.667	1452.67	1732	1669.67	1330	1240.67	1074.33	606.667	863	0	Spinalcord_RT
Acap3		2131	2500	1035	1225.33	1120.83	1253.5	1707.4	1628	514.667	605.667	337.667	299.333	100.667	110	387.333	411.667	538.667	444	415.333	331.333	704	824.667	0	Brain_CE
Acat1	lipid_GO	2203	2329.67	1763.33	2159.67	1219.5	1577.33	3026.6	2838.4	1147	1134.67	2138.67	2044.33	7080	8286.33	3146.33	4634	4307.67	6435.33	18671.7	16780	9671	13074.3	0	BAT_RT
Acat2	lipid_GO	476	609	501.333	542.333	187.5	246.5	1212.8	1138.4	159.667	191.333	480	503.333	801.333	792.333	623	1832.67	904.667	1914.67	2588.33	3773	183.333	718.333	0	BAT_CE
Acbd3		664	780.333	904.667	1113	961.833	1070.67	1373	1288.8	1123.67	1042.33	2353.33	1957.33	409.333	429.333	693.333	1000.67	741.667	794	858	941.333	619	850.333	0	Ileum_RT
Acbd4		743	796.333	473	570.667	256.333	316.333	741.4	736.6	405.333	389	1343	1455	856.667	1147.67	1707.67	2033	2258.67	2493	2484.33	2461	854	1226.33	0	SAT_CE
Acbd5		1584	1788.67	1337.67	1629.33	698.833	863.5	2710.8	2584.4	944.667	860	1775.67	1758.67	4955.33	5478	1459.67	1645	1344	1589.67	2145.67	2524.67	1203.33	1672.33	0	Liver_CE
Acbd6		738.5	857.333	745.667	888.667	405.833	455.333	905.8	924.8	477.333	516	327	258.667	350	407	324	636.667	357.333	450	518	558	1259.67	1047	0	muscle_RT
Accs		79.5	68	226.667	283	116.833	124.5	186.4	157.8	271.667	276.333	178.333	114.333	59.6667	86.3333	311.667	314.667	300	256	223	166	141.333	123	0	VAT_CE
Acd		407.5	443.667	264.667	313.333	657.833	786.5	699	665	370	383	154	116.333	111.333	145.667	129.667	180	173	158.333	206.667	176.333	274	327.333	0	Bonemarrow_CE
Ace		742	915.667	683	850	385.167	368.5	1115	1009.8	395.667	457.333	4709	4150.33	21.3333	20	1223.33	4845.67	3018.67	957.333	812.667	659.667	3620.33	5130.33	0	muscle_CE
Acer2		119.5	134.667	126	144.333	45	55.1667	335.8	340.8	85.6667	82.3333	186.333	169.333	217.667	259.667	375.667	446	579.333	527	989.333	1112.33	93.6667	129.667	0	BAT_CE
Acer3		838	913.667	1070.67	1268.67	881.667	908.833	408.8	364.6	1237.67	1224	721.667	581.333	407	429.333	686.333	562.667	394.333	499.667	418.667	509.333	80.6667	138.667	0	Hypothalamus_RT
Ache	marker_Ther	1423.5	1544.67	2780.33	3341	2114	2899.17	6269.6	6030.4	217	298	90.3333	72.3333	11	11.3333	12.6667	18.6667	23	16.3333	41	25.3333	2232	1897	0	Spinalcord_RT
Acin1		1436.5	1830	2524.67	2928	5693.33	6840.5	3442.2	3603.4	4171.33	4028.67	3369	2672.33	1075.67	1150.67	1606	2132.67	1884	1904.67	1767.33	1581.67	3350.67	4180	0	Bonemarrow_CE
Acly	lipid_GO	6297.5	7257	4731	5628.33	4866.67	5346.5	14973.2	13745	5111.67	4611	4614	5373	7699	8363.67	7869	47491	23522	71987.3	59446.7	186436	1571.33	15652.3	0	BAT_CE
Aco1		1047.5	1170.67	829.667	1019	794.333	1050.33	1495	1454.6	1062	1116.67	3832.33	3982	6285	7193	4025.33	5735.67	5191.33	4012.67	7619.33	5660.33	1402.33	2097	0	BAT_RT
Aco2	marker_Ther	8354.5	9461.67	6286.67	7668	2892.83	3679	15764.4	15247.2	2068.33	2239.67	8763.33	8058.67	3567.33	3222.33	4700.33	6675	7172.33	18053	113055	88324.3	94900.7	105980	0	BAT_RT
Acot1	lipid_GO	135	152.333	86	105.333	51.6667	43.6667	185.6	183.2	47.6667	51.3333	49.6667	22.6667	292.333	317.667	40.6667	93.6667	9.66667	19	195	70.6667	48.6667	30.6667	0	Liver_CE
Acot11	marker_Ther	1245.5	1447	1067.67	1167.33	334.167	388.667	4094.8	4415	297	308.667	1132	913.667	183.333	168.333	149.333	89.6667	102	2577.67	7428.33	27815	774.667	2133	0	BAT_CE
Acot13	marker_Ther	731.5	827.667	440.667	568	243.5	301.333	1254.2	1184	220.333	205.333	401.667	396	483.667	574	255.333	524.667	329.667	696.333	2095.33	1833.67	3694.33	4379.67	0	muscle_CE
Acot2	lipid_GO	103	97.6667	80	108	56	91.3333	126.2	121.6	211.667	218	112.333	72.6667	74.3333	58.6667	184.667	239	242.667	313	1489	1229.67	489	519.667	0	BAT_RT
Acot6	lipid_GO	139	167	183	234.333	17.6667	25.8333	129.8	120	51.3333	52	54	40	22	20.3333	110.667	153.667	86.3333	74	142.667	87.6667	98.3333	112.333	0	Hypothalamus_RT
Acot7	lipid_GO	5585	6307.33	3327	4192	711.833	707.667	9557	9574.8	269.667	261.333	685	781.333	291	322	210.667	294	228.667	172.333	341.333	315.667	1192.67	1172.33	0	Spinalcord_CE
Acot8	lipid_GO	164	188	176.667	207	343.167	405	251.6	239	276	240	498	422.667	238	238	127	179.333	153	201.333	280.667	288.667	263.667	308.667	0	Ileum_RT
Acot9		371.5	402	285.667	343.667	619.167	625.5	460.6	445	516	466.333	829	724.333	53.3333	73.3333	720	1189.33	618.333	763.333	1092.33	1013	1043.33	1397.33	0	muscle_CE
Acox1	lipid_GO	4831.5	5447.67	3774	4513.67	907.167	1012.17	5792	5308	917.667	957.333	9108	8977.33	49979.7	53557	9214	11971.3	12456.3	12361	21628.7	18397	8344.67	10460.3	0	Liver_CE
Acox3	lipid_GO	744.5	849	584	706.667	1823.17	1697.67	1731	1682	1983	1823.33	1705.67	1425.67	874.667	913.333	1056.67	4668.67	1069	1043	1480	1480	1413.33	1824.33	0	VAT_CE
Acp1		371	417	341	437.667	872.5	1191.83	701.2	654	407.333	548.667	498.333	469	327.667	380.333	330.333	540.667	280	361.667	399	440	1188	1566	0	muscle_CE
Acp2		1353.5	1619.33	1494.67	1873.33	691.5	839.5	2741.8	2431.6	1841	1758.67	1184.67	923.333	1169	1310.67	785.667	970.333	943.667	757	1066.67	773	1504.67	1842.67	0	Spinalcord_RT
Acp6		155.5	178	369.667	415	321.333	425.167	336.2	344.2	444.333	428.667	1375.67	1182.33	579.333	584.333	483	719.333	599.667	670.333	613	536.333	1122.67	1270.33	0	Ileum_RT
Acrbp		42.5	60.6667	208	207.667	223.333	249.833	213.2	201.2	258.667	220	174	176	78.3333	69.6667	123.667	181	143.333	244.667	180	119	136.333	222.333	0	Spleen_CE
Acsf2	lipid_GO	95.5	97	67.6667	101.667	157.167	219.5	494.8	465.4	311.333	304	405	436.667	1515.33	1100.67	121.333	150.667	277	402.333	568	915	210	585	0	Liver_RT
Acsf3	lipid_GO	383	371.667	346	442.667	205.5	260.333	685.6	647.8	252.667	215	563.333	449.333	543.667	509.333	368.667	396.333	508.333	700	1747	2643.33	820	1097.33	0	BAT_CE
Acsl1	marker_Ther	1308.5	1551	1224	1428.67	5224.83	6550.5	2026.6	1828.2	1768.33	2109	1110.67	1099.33	31094.3	34430.7	14961.3	20047	31813	31303.3	79077.3	47234.7	18207	23220.3	0	BAT_RT
Acsl3	lipid_GO	4441	4549.33	3980.67	4924	189.5	222.667	8776	7825.2	333	348.667	1068.67	1060.67	597.333	698	206	744.333	238.667	606.333	1045.67	1430.33	1833.67	1545	0	Spinalcord_RT
Acsl4	lipid_GO	1677	2199	1330	1590.33	1230	1473	1400.6	1325.4	1066	1038.33	571.667	423.667	2171.33	1738.67	1549.67	1929.67	600	707.667	624.667	783.333	1240.67	1645.33	0	Brain_CE
Acsl5	lipid_GO	1235	1516.33	795.667	945	4110.5	4897.5	1308.2	1265	2698.67	3163	15823	17965	7193.33	9819.67	1063.33	1299.67	1302.33	3713	9406.33	35883.7	400.333	1625	0	BAT_CE
Acsl6	lipid_GO	5466	6024	5485.33	6494	70.5	123.667	8725.4	9232.8	79.6667	120.667	37.3333	25	6.66667	7.33333	9	32.3333	19	10.3333	36.3333	23.6667	1156	1645.67	0	Spinalcord_CE
Acss1		516.5	576.667	708	812.333	2163	2959.83	868.2	806	1622	1935	1791	1360.67	25.3333	15	191.667	504.667	435.333	742.333	5779.67	5791	1647	1742.67	0	BAT_CE
Acss2		1494	1633.33	1197	1325.33	514.333	620.333	3591.6	3434.4	592	604	1184	1286	4495	5177	1498.67	6944	4672.33	13308.7	10060.7	18746.3	2500	4712	0	BAT_CE
Acss3		61.5	68.6667	114.667	148.667	5.16667	6.33333	135	130.8	19.3333	10	66.6667	63.3333	790.333	514.333	2291.67	3129	2083	2297.67	2880.33	5408.33	164.333	384.333	0	BAT_CE
Acta2		253	278.667	282.667	301	218.667	195.167	257.2	285.2	1814	1623	6067.67	4718.67	28.3333	53.3333	2343	1995.33	598.333	186	545	311.333	1602	1663	0	Ileum_RT
Actb		31653.5	35771.3	13465.7	17598.7	61412.5	65867.3	16918.4	15396.4	94057.3	87987	118312	117048	16798.3	19222	21709	20717	24983	15365.7	15927.3	12951	13202.7	17270	0	Ileum_RT
Actg1		107.5	98.6667	79	98.3333	160.667	161.667	108.2	99.4	292.333	275.333	586	486	57	66.6667	219	180	270.333	218	252	196	5369.67	6575	0	muscle_CE
Actl6a		221	253.667	213	264.333	1459.5	1822.33	410.8	402	950.667	1037.67	780	762.333	314	407	362.333	651	345	393	507.333	479	831.667	972.333	0	Bonemarrow_CE
Actn1		869.5	1116.67	726.333	859	6030.67	6173.67	1084.8	1082.2	3228	3025.67	2401	1869.33	464.667	568.667	673.667	573	593.667	396.667	216	146.667	464	555.333	0	Bonemarrow_CE
Actn4		1420.5	1818.67	696.333	812	6464.33	7946.33	3291.8	3094.4	2020.33	2040.67	13156.3	10393.3	2690	2078.33	2692.67	2216.67	2559	1407.33	2595.67	2432	2563.67	3691.33	0	Ileum_RT
Actr10		2735.5	3154	2277.67	2714.67	1102.17	1277.67	3946.6	3645.2	1014.33	975.667	1214	1050	630	788.333	783.667	1136.33	819.333	980	1231	1322.67	2417.67	2650	0	Spinalcord_RT
Actr1a		5233	6138.33	3386	3856.33	2897	3369	7660.6	7260	2119	2228.67	3510	3314.33	1157.33	1344.33	1757	2357.67	2017.33	1820.33	2789.67	3016	5187.67	5779	0	Spinalcord_RT
Actr1b		5148	6054.33	3863.67	4469	899.333	1050.83	6410.6	6557.8	1252	1294.33	2015	1835	1480	1684.33	1090.33	1586.33	1301.33	1411.67	2582	2847.33	6092.67	7030.67	0	muscle_CE
Actr2		3972.5	4385	1983.33	2412	8942.67	9265.33	5120.8	4821.8	4917.33	4213.33	5620	5661.33	1799.67	1775.33	1649	1788	1723.33	1822	1401.33	1512.67	1703	2367	0	Bonemarrow_CE
Actr3		1452.5	1690.67	1134.67	1365	7108	7173	2035.8	1982	5780.33	4950.67	5289.67	4981	611	709.333	1094	1327	1352.67	1507.67	1418.33	1326	1758.33	2359.33	0	Bonemarrow_CE
Actr5		155	159.667	290.333	312.667	330.167	376.833	222.2	227.4	470	465	282.667	253.667	172.333	174.333	183.333	212	232	226.667	191	155.333	129	198	0	Spleen_CE
Actr6		387.5	394.333	321.667	360.333	211.667	234.833	419.4	408.4	224	206.333	111	85	157	176.667	234	388	214	325	482	333.333	262	335.667	0	BAT_RT
Actr8		970	1169	1133.33	1356.67	558.5	655.167	1419.8	1397.8	669.333	655.667	580.667	471.333	459	582.667	527.667	781	651	588.333	985.667	812	1603	1661	0	muscle_CE
Acvr1		410	485.333	245	285.333	97.1667	95.3333	733	757.6	85.6667	89	386.667	312.667	282	284.333	472	400.667	434	206	204	143	1304.67	1541.33	0	muscle_CE
Acvr1b		2253	2784	1898	2206	562.167	545	1758.8	1718.6	628.333	602	2020.33	1590.33	312.333	326.667	585	723.333	573.667	361	272.667	200	2390.67	2610.67	0	Brain_CE
Acvr2a		1189	1378.33	1163.67	1336.67	105	112	621.8	629	467.667	431.333	1730	1581	660	717.667	681	990.333	870.333	955	758	717.667	1706	2117.67	0	muscle_CE
Acvr2b	marker_Ther	88	123.667	340.333	391.667	13.3333	20.6667	129	137.2	43.3333	39.6667	131.667	113.333	79.6667	87.6667	108	103.667	97	71.3333	116.667	82.6667	313	356	0	Hypothalamus_RT
Acvrl1		283.5	371	217.667	246.333	1069.33	1022.67	499.6	467	696.667	690.667	414	353	101.667	126.333	602.333	670.667	684.333	410	556.333	574.667	795.333	1083.33	0	muscle_CE
Acy1		271.5	253	159.667	192.333	128.667	155.667	589.6	526.4	171	135.333	1253.67	1506	439.333	562.667	85	187.333	126.333	93.6667	151	116	297.333	326.667	0	Ileum_CE
Acy3		43.5	44.3333	16.3333	19.3333	19.5	42.3333	322.8	270	34.3333	35.6667	215	221	738.333	898.667	170.667	189	154.333	128	301.333	269	107.333	133.333	0	Liver_CE
Acyp1		257.5	291	126.667	140.333	251.833	296.333	423.2	439	177	192.667	86.6667	78.6667	96	115.333	169	331	200.667	227.667	288.333	294.333	621	755	0	muscle_CE
Acyp2		320.5	355.667	226.667	274	25.5	28.5	782.4	836.8	34.6667	35.3333	33	39.3333	18.6667	19.3333	368.333	344.667	344.667	742.667	1141.33	1386	3558	4474.33	0	muscle_CE
Ada		16	11	31.3333	40	365.333	351	36.2	32.6	252.333	280	4094.67	12592	27	38	35.3333	48	70.3333	51	25.6667	14.3333	24	29.3333	0	Ileum_CE
Adal		349	392.667	453.333	533	260.667	312.833	669	664.6	433.333	366.667	277	257.333	320.667	367.667	198.667	338.667	200	298.333	291	389	1073.33	1221.67	0	muscle_CE
Adam10		1816.5	2085.33	1191.33	1327	6662.33	8587.5	2750.4	2637.6	2406.33	2419.33	4113.67	3540.67	651.333	632	1005.33	1926	1019	929.333	723.667	834.667	809.333	1223.67	0	Bonemarrow_CE
Adam11		1345.5	1542	1060	1308.67	219.333	183.5	3961.6	3905.2	129.667	133.667	81.3333	54.6667	136.333	167	108.333	53.3333	64.6667	58.6667	71	69.6667	23	22.6667	0	Spinalcord_RT
Adam12		78	82	139	156	33.6667	46.5	123.2	98.2	61.3333	58	49.3333	39.3333	19.6667	16.3333	378.333	449	785	934	1563.33	1229	27.3333	148	0	BAT_RT
Adam15		657	748	1588.33	1876	1479	1261.5	3974.2	3866.4	424.667	438.333	609.667	550.333	45.3333	58.6667	2658.67	2101.33	2278.67	1292.33	1080.67	1135	1456	1935.33	0	Spinalcord_RT
Adam17	marker_Ther	406	478	520.667	605.667	1682.67	1839.17	968.6	874.8	2612.33	2358	1591.33	1391.33	582.667	652.333	779	1098.33	1043	1026.33	1056	1098	1086.33	1485.33	0	Spleen_CE
Adam19		336.5	405.333	381.667	433	2199.17	2442.67	1703.6	1588.4	1995.67	1718	1143.67	716.333	50.3333	59.6667	384.333	409	907.667	864	290	282	399	715	0	Bonemarrow_CE
Adam1a		26	33	237.667	266	66.1667	82.6667	374.4	354.2	96	73	98.3333	100.333	23.6667	17	74	100	65	83.3333	65.3333	41.3333	56.3333	103	0	Spinalcord_RT
Adam22		6804	9002.67	8071.33	9318	42.5	60.5	7322	6674.6	539.333	483.333	273.333	199	19.3333	20.3333	192.333	208.667	251	182	165.333	101.333	78	98	0	Hypothalamus_RT
Adam33		19.5	21.3333	33.6667	39	204.333	446.167	191	179.2	229.667	207.333	168.667	132.667	25.3333	29.6667	253.333	302.667	571.667	415.333	92	65	226.667	371.333	0	SAT_RT
Adam4		14	23	136.667	134.333	9.66667	12.3333	12	11.8	117.667	90.6667	157.333	119.667	53	43.6667	55	86	66.3333	80.6667	56	39	5	20.6667	0	Ileum_RT
Adam8		14.5	27.6667	117	106	4082.33	3486.67	127	127.4	634.333	658.667	139.333	100.333	8	14.6667	202.333	114	230.333	156	48.3333	33.3333	54	69.3333	0	Bonemarrow_RT
Adam9		1263.5	1512.33	857	974.333	598	688.333	2313.6	2198	854.333	824.333	1255.67	999.667	1731	1897	2169.33	1995.67	2150	1469	2063.33	2035.67	4009	4894.67	0	muscle_CE
Adamts1		441.5	521.667	318.667	365.667	36.3333	60.1667	802.4	684.4	334	331	166.333	131.667	286.333	339.333	842.333	748.667	753	486.667	818.333	538.667	2092.33	2167.33	0	muscle_CE
Adamts10		275	302.333	830	957.333	1008.17	1071	1043	923.6	1879	1652.33	619.333	492.667	178	216.333	954.333	1037.67	1114	1246.33	571.667	632.333	530.667	744.333	0	Spleen_CE
Adamts12		25.5	30.3333	60	79	5	7.33333	40.2	41.2	62	51	131.667	106	19.6667	22.3333	1258	1248	2115	1448.33	424	355.333	225.333	337.333	0	SAT_RT
Adamts15		243.5	301.333	283.667	305.667	13.5	14.1667	130	128	34	32.6667	487	459.333	27.6667	24.3333	657	730.333	476	286	130	133.667	153.333	252.667	0	VAT_CE
Adamts2		264.5	299.667	1065.33	1100.67	265.833	343.667	566.6	481.2	224.667	240	111.333	96.6667	165	164.333	1523	1306.67	2521.67	892	519.333	330	835.667	1154	0	SAT_RT
Adamts3		349.5	483.667	187.667	213	82.6667	98.1667	617.8	575.8	53	64.3333	56.6667	48.6667	6.66667	7.33333	29.3333	30.6667	16	14.3333	33.6667	26.3333	83.6667	127.333	0	Spinalcord_RT
Adamts4		475	526.333	478.667	611.333	7.83333	8.83333	2830	2597	45.3333	38	86	64.6667	7.33333	13	56.3333	71.3333	108	65	59.6667	50	14.6667	56.6667	0	Spinalcord_RT
Adamts5	marker_Ther	96	108.333	84	101	92	142	419.2	479.6	509.667	445.667	92	77.3333	66.3333	53	5922	3115.33	3723.33	2010.33	710.667	558.333	959.667	1363	0	VAT_RT
Adamts6		346	362.667	351.333	447.667	62.5	76.1667	328.4	299	645	455.333	205	131.333	31	62	188.667	211.333	183.333	215.333	119.333	71	33.6667	45.3333	0	Spleen_CE
Adamts7		7	8.66667	19.6667	18.6667	37.1667	45.8333	22.6	23.6	88.6667	84	51	35	127	148.667	72	111	95	73.6667	58	70.6667	47	36.6667	0	Liver_CE
Adamts9		124.5	163.667	342.333	343.667	22.6667	39.3333	299	287.4	418.667	390	245	212.333	170	137.333	1542.33	2383	1433.67	1505	1916	1664	285.667	354	0	VAT_CE
Adamtsl1		240	254.333	391.333	448.333	6.83333	10.5	805.8	734.2	68	63.6667	87.6667	64	30.3333	29.3333	460	512.333	696.333	371.667	161.667	106	373	525	0	Spinalcord_RT
Adamtsl2		123	164.333	153	163	7.16667	7	171.4	173.8	853.667	787	15	17.6667	220	259.667	41.3333	80.6667	27	9	17.6667	20.3333	120.333	134.667	0	Spleen_CE
Adamtsl3		127	144.333	193.667	195.667	20.5	29.6667	188.4	160.6	34	20	274.333	192	14	13	118.333	313.667	221.667	156.667	910.333	254.667	213	393.667	0	BAT_RT
Adamtsl4		144.5	135	240	315.333	64.6667	68.6667	1810.4	1718.8	168.333	161.333	233.667	174.333	57.3333	42.3333	374	237.333	530	259	133	99.3333	1160	1404.67	0	Spinalcord_RT
Adamtsl5		84.5	99.3333	39.3333	34.3333	20.5	34.5	381	310.4	134	131.667	776.333	686.333	23.3333	19.3333	176.333	195.333	306	227	154.333	305	1611	1771	0	muscle_CE
Adap1		3771.5	4221	1684.33	2036.33	1095.17	1016.5	5591	5393.6	535.667	482	3664.33	3336.33	20	21	179.667	370	408.667	685	317.333	1170.33	62.6667	135.333	0	Spinalcord_RT
Adap2		61.5	52.3333	91.3333	129.667	112.667	154.167	143	114.2	705.333	681	560	453.667	919	943	688	386.667	489.333	304.333	185	140.667	125	143.333	0	Liver_CE
Adar		3315	4065.33	4249.33	4887.67	2924.83	2999.67	7003	7079.8	2515.33	2628.67	1805	1416	559	636	474.667	790.667	812	692.667	399.333	373	285.333	395	0	Spinalcord_CE
Adarb1		5521.5	6643.33	4022	4737	83.3333	121.5	8197.2	8071.2	183	145.667	59	50.6667	361.333	385.667	637.333	663.667	715	508.667	781.333	571.333	730.667	805.333	0	Spinalcord_RT
Adat1		141	149.667	250	269	103.333	132.667	345.2	346.2	195	168.333	144.667	103.333	116.667	114	107	169.333	106	106.333	100	103.333	143	185	0	Spinalcord_CE
Adat2		69	79	28	38.6667	89.8333	119.833	103.8	97.4	50.3333	59.6667	43.3333	48	39.6667	35	44.6667	53	51	39.6667	70	60.3333	169	149.333	0	muscle_RT
Adck1		795	851.667	611	740.667	205.667	243.667	998.6	972.4	318.333	304.333	205	171.333	318	345.333	242.333	352.667	317.667	386.333	1138.33	952.667	1440.33	1601	0	muscle_CE
Adck2		268.5	309.333	424.667	524.667	349.333	388.5	705	696.8	365.667	321	373	272.333	183	177.667	284	349.667	321.333	338	563.333	449	284	343.667	0	Spinalcord_RT
Adck5		182.5	180.333	285	345	202.167	279	304.6	277.8	259.333	277.333	2004	1990	680	854.667	229.667	362	160	131.667	109.667	77	205	196.333	0	Ileum_RT
Adcy3	marker_Ther	841.5	931.333	1321	1556.67	229.833	299.5	2117.2	2110.8	540	525.667	148.333	113.667	56.3333	51	260	311	632	792	3927.33	7368.67	163.667	466.667	0	BAT_CE
Adcy4		51	60	80.6667	78.6667	39.5	66.3333	166.6	169.6	216	195.667	76	61	81.6667	101	242	251.333	312	245	443.667	381.333	574.667	750.667	0	muscle_CE
Adcy5		3993	4434.67	4134.67	4826	125.667	171.333	3535.4	3282.8	312.333	300.667	550.667	439.667	71.3333	69.3333	3172	2411.67	3965	1560.33	392.333	200.333	170	224.333	0	Hypothalamus_RT
Adcy6		695	840.667	1733	1807.33	2819.33	3960.5	1674	1609.8	874.333	1167.67	5141	4391.33	571	535.667	2901.67	2860	3363	2589.67	6374	4230.67	1829.33	2444	0	BAT_RT
Adcy7		255	307.667	823.333	995.333	3628.83	3853.33	830.4	777.8	5633.33	5181.33	1222	790.667	128	157.333	730.333	1315.67	1412.67	1477.33	312.667	279.333	387.667	732.667	0	Spleen_CE
Adcy9		1492	1871	1013.67	1112.33	222	271.667	1682.4	1696.8	312.667	289.667	1195	1012.33	861.333	927.667	428.667	581.667	622	476.333	1777.67	891.667	3571.33	3764.33	0	muscle_CE
Add1		8632	9872.33	5245.33	6427.67	10744.2	13757.2	10911.2	10316.6	5757.33	5994.67	6138.67	5092	866.667	993.333	1996	2665.33	2448	1855.67	2333	2010	4194	4390.33	0	Bonemarrow_CE
Add3		3578.5	3999.67	2302.33	2876	4392.17	4701.17	4082	3850.2	5473	4717	5306.33	4505	333.333	393.667	1328	1911.33	1882.33	1510.33	2487.33	1886.33	1629.67	2231	0	Spleen_CE
Adh1		13	20.3333	37.3333	17.3333	21.8333	36.3333	145	123.4	26	24	351	322	31412.7	38672	1795.67	2357.67	1574.33	1753	1939.33	1459.67	768	844.333	0	Liver_CE
Adh5	lipid_GO	1154.5	1265.33	845.333	967	939.833	1116.17	2051	1973.6	1288	1238.67	1136.67	1239	6664.33	8439.67	1825	3127.67	1511.33	1962.67	2616.33	2609.67	2912.67	3506	0	Liver_CE
Adhfe1		332.5	337.333	337.333	424	33.1667	33.5	629.4	562.4	56.3333	73.3333	54.3333	51	2133.67	2132.33	2809	2941.67	2965.33	2645.67	4995	3486	2100	2313.67	0	BAT_RT
Adi1		337.5	366.333	249	284.333	357.333	459.5	1369.4	1305.6	224	225.333	234.667	168	1440.33	1348.33	277.667	421.333	270.333	288.667	354.667	355.333	3748	3396.33	0	muscle_RT
Adipor1	marker_Ther	1758	1971	1274.67	1465.67	8510	10340.5	2888	2682.8	4359.67	5107.33	3702.67	3617	2166.33	2543.33	2714	3761.33	2650.33	2687	5246.33	5388.33	16348.7	15678	0	muscle_RT
Adipor2	marker_Ther	1767	1871.33	1345	1570	3698.33	4082.83	4332	3824.4	2121	2151	5222.33	5534.33	14585	16883.7	12500.7	13021.7	15124	13074.7	23822.7	23937.3	9217	11982.7	0	BAT_CE
Adk		1371	1556.33	872.667	1048.33	797.167	1063.67	2283.8	2276.8	626.667	704	2785.67	2877	10277.3	11503	1186	1443.67	1011	1419.33	2045.67	2542.33	3025.33	3979.33	0	Liver_CE
Adm		34	42.3333	15.6667	12.6667	7.66667	11.3333	89.2	98.8	59.3333	53	140.667	86.6667	19.6667	21.3333	95.3333	88	139.333	57.6667	50	33	128	141.667	0	muscle_CE
Adnp		1364.5	1750.67	2188.67	2385.33	2920.5	3521.17	3528.8	3415.4	2021.67	1824.33	2677.67	1974	1036.33	908.667	1274.67	1759.67	1375	1246	1208.67	993	1853.67	2388.33	0	Spinalcord_RT
Adnp2		696	850.333	648	720	647.5	715.167	694	718.6	684.333	676.333	673.667	571.667	201.667	256.333	330	500.333	389.667	308	499.333	468.667	217.333	293.667	0	Brain_CE
Ado		1489	1852.67	887.667	1113.33	464	543.333	3104.4	2854.8	906.667	870	642	564.333	511.667	502	463.333	1126	468	520	737	790	1347.67	1606.33	0	Spinalcord_RT
Adora2a		586	616.667	42.6667	41.3333	131.333	165.667	53.6	49.2	202.333	196.333	46	32.6667	19.3333	29.6667	121.333	129	160	131.667	213	145.667	73	76.6667	0	Brain_CE
Adpgk		378.5	451.333	679	764	11917.2	10376.2	795.2	782.4	1437.33	1490.67	701	528	431	486	554	1010.33	586.333	680	574.667	478.333	450.333	593.667	0	Bonemarrow_RT
Adprh		1536	1574.33	873.333	1082.67	1351	1476.33	2478.4	2359.8	626	586.333	410.333	350.667	125.667	150	265.333	325.333	402.333	259.333	413.333	356	1735.33	1759	0	Spinalcord_RT
Adprhl2		479	505	342.333	431	297.833	359.167	477.2	467.4	491.667	525.667	316	288.333	255.333	267.333	304.667	446.667	393.667	362.667	480.333	455.667	333	375.333	0	Spleen_RT
Adprm		198	242.667	235	252	319.167	319.5	381.8	355	272	257	624.667	598.333	246	295.667	182	280.333	204	228.333	284.667	274	232	299.667	0	Ileum_RT
Adrb2	marker_Ther	40	49.3333	36.3333	43	1297	1681.17	52.4	49	698	737	86.3333	54	16	25.3333	122	101.333	281.667	182.667	264.333	186	535.667	908.333	0	Bonemarrow_CE
Adrm1		131	152	195.667	255.333	172	210.833	200.8	209	282.333	298.333	245	256.333	209	227	215.667	371	231	331.333	363.333	312.333	4202.33	4191.33	0	muscle_RT
Adsl		519.5	591.667	585.667	730.333	769.5	958.167	932.4	922.8	881.667	926	806.333	646.333	380	446.333	485.333	619	638	559	1067	852	6993.67	7411.67	0	muscle_CE
Adss		1531.5	1852.33	1389.33	1674	1845.33	1958.67	2933	2869.4	1430.67	1421.67	2506.67	2237	941.667	1139.67	814.667	1105.67	830.333	847.667	1343.33	1310.33	584.667	740.667	0	Spinalcord_RT
Adssl1		404	405.333	264.667	384.333	1669.67	1569.67	1855	1589.8	171	195.667	23	10.6667	198.333	275.333	50.6667	59.3333	168	128	1379.67	803	57811.7	50733.3	0	muscle_RT
Aebp1		649	600.333	368.333	412	32.5	43	2289.8	1900.8	441.667	367.333	243.667	233.667	37.3333	36.6667	1521.33	1819	2345.33	668.667	424.667	455	9048.67	10286.3	0	muscle_CE
Aebp2		771	969.667	1059	1190.67	1041.67	1197.33	1482.8	1509	1719.67	1580	1409.67	1142	436	408.667	961.667	1048.67	1010.67	964.667	818.333	807	1331.67	1758.33	0	muscle_CE
Aen		372.5	402	356.667	422	264	308.667	466.2	473.4	572	556.667	316.333	328.333	234.667	224.667	190.333	440.667	196.667	287.333	253	312.333	1694.67	1835	0	muscle_CE
Aes		6952.5	7858	4311.33	5419	4255.67	4559.5	14562.8	13936.6	3130	3090.67	5592.67	4957.33	6712.67	6954.67	1761.33	2493	2275.67	3191	4932.67	6412.67	29122	28566.3	0	muscle_RT
Afap1		448	537	569	609	236	285.5	1088.8	1006.4	380	326.333	365.333	257.333	57	43.3333	1537.33	1368	1859	1394	901.333	1241.67	428	663.333	0	SAT_RT
Afap1l1		483.5	617	295	340.667	159.167	201.333	944.2	907.8	123.667	132.333	175.333	139	72.3333	94	293.667	453	318.333	304.333	620	475.333	3611.67	3791.33	0	muscle_CE
Afap1l2		349.5	379.333	311.667	358.333	49.5	70.6667	491	455.6	571.333	508.667	117.333	85	38	38.6667	174.333	390	154.667	103	108.333	92.6667	130.333	186.667	0	Spleen_CE
Aff1		368.5	446.667	431.667	490	6431.17	7983.17	1213.6	1229.8	2697.33	2501.33	3047.33	2530.67	1025.67	861	1925.33	1871	1628	1142.67	944	760	3732.67	4030.33	0	Bonemarrow_CE
Aff3		1374	1533	1297	1601	921.667	1335.5	1838	1763.4	2140.33	1702	248.667	113.667	9.66667	12	148.667	217.333	347	333	52	39.3333	121	165.333	0	Spleen_CE
Aff4		5718.5	7472.33	9641	11043.3	1922.67	2108.67	6697.2	6226.2	4586	4144	5862.33	4942.67	3813.67	3700.33	4535.67	5933.33	3905	3398.33	4175	3395.67	4400	5116.67	0	Hypothalamus_RT
Afg3l1		502	560.667	525.667	671	1326.33	1551.17	1150	1094.4	680	712	819.333	711.667	1265.33	1198.33	690.333	697.667	736.333	688	1088.67	1260.67	3463.67	3825.33	0	muscle_CE
Afg3l2		1467.5	1644	1241.33	1535.67	1835.83	2415.83	2729.4	2888.8	955.333	1016.33	2289.33	2028.67	1288.33	1426.67	685	1011.67	826.667	1318.67	4477.67	4460.33	4849.33	6025	0	muscle_CE
Afmid		52.5	63.3333	175.667	229.667	847.833	1152.67	158.2	143.4	524.333	569	258.333	208.333	2306.67	2851.33	76	87	78.6667	76.6667	61.6667	48.6667	232	254	0	Liver_CE
Aftph		2935.5	3400.33	2300	2675	2306	2783.83	2720.6	2810	2833.33	2596.33	3871.67	3596.33	1118	1244.67	1077.33	1771.67	1088.33	1296.67	1363	1366	1108.33	1536.67	0	Ileum_RT
Aga		117.5	137.667	135.667	165	193.333	218.167	325.8	297.2	277.333	283.667	304	264	238.333	298.333	334.667	639	421	437	612	620	650.667	802.333	0	muscle_CE
Agap1		3429.5	4074	5203.33	5759.67	1629.33	1706.33	6068.4	5710.2	1098	1260.67	2869.67	2437	466.333	454.667	1069	1713.67	1171.33	733	699	648.333	1042.33	1437.67	0	Spinalcord_RT
Agap2		9446	11225.3	4382	4906	893.167	907.5	3420.6	3470.4	1173	1090.67	293	155.333	108.667	74	64.6667	93.3333	157.667	196.667	100.667	84.6667	96.3333	118.333	0	Brain_CE
Agap3		2576	2792.33	1801.33	2128.67	671	843.5	5623.8	5678.8	672.667	691.333	478.333	419	440.667	468.667	498.667	734	625.333	509.667	718	613.333	2608.33	2447.33	0	Spinalcord_CE
Agbl3		147.5	168.333	242.333	302	31.3333	41.8333	189.4	164.2	137.667	110.667	52.3333	28.6667	61.3333	63.6667	341	467.667	253.667	263.667	264	153.333	29	55.3333	0	VAT_CE
Agbl5		144.5	214.667	571.667	676.333	263.833	333.333	396.2	358	392.667	356.333	489.333	353.333	144.667	145.667	280.667	508.333	235.333	236	167.667	131.667	175	196.667	0	Hypothalamus_RT
Agfg1		2389	3116	2513.33	2825.67	1223.17	1378.83	1348	1320.4	3030	2757	3082.33	2398.33	660.667	707.667	1074.33	1517.33	1211	1337	1275	1116	1063	1247	0	Brain_CE
Agfg2		889.5	990.667	544.333	617.333	1585.17	2184.33	1063.2	1012.6	560.667	727	522.667	430.667	755.333	745	553.333	838.333	468.667	492	372.333	403.667	201.667	304	0	Bonemarrow_CE
Aggf1		1117	1349.67	859	1007.67	1637	1870	1819.6	1835.6	1222.33	1188	1123	1051.67	576.333	724.333	455.333	709.333	576.667	598.333	984.333	823.667	1253.33	1578	0	Bonemarrow_CE
Agk		271.5	321.667	378.667	436	78.3333	97	329	310.4	285	269.667	219	133	75	65	177	232.333	177.333	194.667	221	191	308	354	0	Hypothalamus_RT
Agl		1258	1433.67	1542.67	1951.33	1459	1406.17	3294	3159.6	690	579.667	767	536.333	1281.67	1455.67	944.667	1327.33	1558.33	2345.33	5310	5922.33	68296.3	69879	0	muscle_CE
Agmo		143.5	168	123.667	137.667	15.6667	27.5	425.8	413.2	91.3333	71	1635	1879	1454	1513.33	965	1182	1116.33	1407.33	1621.33	748.333	78.6667	196.667	0	Ileum_CE
Agpat1		1896	2196.33	1589.67	1857.67	1161.17	1339.5	2552.2	2436.8	951.667	936.667	1612	1516.33	127	135	953	1211	886	1122.33	2109.67	2543	4916.67	4718	0	muscle_RT
Agpat2		33	41.3333	50.6667	65	1261.17	1138	77.2	60.8	254.667	242	4241	4647.33	4541.33	5048.33	4561.33	13512	8474.33	25696.7	28894.7	55591.3	619.333	4737.67	0	BAT_CE
Agpat3		4154.5	4538.67	3093.33	3705.67	583.667	906.5	8524.2	8229.8	1883.67	1767.67	977	810	3972.33	3986.67	2707.33	4508.33	3124.67	4191.67	11027.3	12601.3	5475.33	6581.33	0	BAT_CE
Agpat4		893	966.333	881.667	1041.67	729.333	1044.83	2885.4	2713	388.667	441.333	554.333	516.667	20.3333	20.3333	92.3333	93.3333	168.667	117	49.3333	52.6667	155	235	0	Spinalcord_RT
Agpat5		1225	1523.33	1272	1501.33	768.167	869.333	2043.4	1996.6	501	536.333	731.667	746.333	209	245.333	378.333	496.333	356	433	551.667	570	1330.33	1558.33	0	Spinalcord_RT
Agps		980	1169.67	1191.67	1364	3248.83	3236.17	2037.2	1811.4	2085	1897.67	1808.67	1624	442.667	473	1183.67	1534.67	1264.67	1342.67	1363.67	1434	1193	1437.67	0	Bonemarrow_RT
Agrn		1988	2315.33	4640.67	5340	1056.67	1245	6866.2	6350	732	771.667	3390	2755.33	801	868.333	791	1516	831.333	540.667	1454.33	1273.67	855.667	1168	0	Spinalcord_RT
Agtpbp1		6631	7872	3234.67	3891	984.167	1058.33	5347.8	5107.4	1441.33	1325.33	551.333	450.333	371.667	396.667	1372.33	1405.67	1108.33	1282.33	1592	1622.67	3260.67	3688.67	0	Brain_CE
Agtr1a		12.5	13	27	29	365.167	537.167	22.4	19.2	402	431.333	44.3333	27.3333	989.333	1204.33	97	119	206	122.333	132	112.333	183	216.667	0	Liver_CE
Agtrap		275	286	337.667	403	1842.17	1784.17	700	639.2	630.667	693	468	350.333	92.6667	142.333	434.667	780.667	619.333	395	472.333	475	760.667	996.667	0	Bonemarrow_RT
Ahctf1		1717.5	2213.33	2336.33	2538.33	3523	4664	1685.2	1725.8	5074.33	5246.67	3404	3029.33	2933.33	3033.33	1794.33	3096.33	1778	1939.33	2196.67	1696.67	2162.67	2832.33	0	Spleen_RT
Ahcy		59.5	74.3333	61	82	153.833	206	129	115.6	108.667	116.333	301.333	262.667	3152.33	3198	45	70.6667	35.3333	40.3333	43.6667	51.6667	1570.33	1537.33	0	Liver_CE
Ahcyl1		6236	6700.67	3797	4987.67	2014	2381.17	19989.6	19034	1494	1337	2335.33	2037	2093.67	1932.33	1686.33	2116.33	1852.67	2939.33	10878.3	12378.7	1779.67	3059.67	0	Spinalcord_RT
Ahcyl2		3146.5	3621.67	3210.33	3681	866.667	977.5	7839	7414	1339.67	1269	8665	7715.67	994.667	898	3929.67	3285.33	3668.33	2170.67	2532	1531	998.667	1363.67	0	Ileum_RT
Ahdc1		834.5	997.333	1112	1279	349	435	1501.4	1605.8	732	620	878	763.333	360.333	276.333	434.333	610	501	457.667	781.333	494	1605.33	2332.33	0	muscle_CE
Ahi1		5931.5	7101	23360	27803.3	424.167	554.5	7860.4	7670.4	405.667	407.333	180.667	138	47	45.3333	181.667	318.667	197	130.333	157.667	137.333	43	70	0	Hypothalamus_RT
Ahnak		2387.5	2794.67	3294.67	3626.33	5724.5	5103.83	2606.4	2659.2	18997	16008.3	47005.3	44139	1704	1794	78977.3	49126.3	84511.7	29919.3	34009.7	25927.7	15065.3	19729	0	SAT_RT
Ahr		144	210	134.667	139.667	132.833	107.333	118.8	129.4	680	617.667	660.667	455.333	1217.67	965.333	257.667	424.333	277	232	336	312	110.333	135	0	Liver_RT
Ahsa1		2323	2754.33	1664.33	1826.67	2013.5	2480.33	3759.8	3875.8	1656.33	1680.33	1289.67	1452.67	1403.33	1752.33	607	1022	765	1011.33	1518.67	2066	5642	6545.67	0	muscle_CE
Ahsa2		278	329.333	605	581	655.833	821.833	1271.2	1392.8	659.667	540.333	379	469.667	446.667	566.333	305	476	349	568	709	716	1670.67	2041.67	0	muscle_CE
AI413582		556	567.333	333	400.333	222	210	608.2	570.4	302.333	310.667	147.667	121.667	21	34.6667	96.3333	154.667	144.667	142	84	84.3333	81	113	0	Spinalcord_RT
AI429214		46.5	55.3333	41.3333	48.3333	17.3333	22.6667	67	51.6	34.3333	25.3333	20	13	12	13.6667	69	92.6667	64.3333	55.3333	47	57.6667	19	12.3333	0	VAT_CE
AI597479		824	1015.67	897	1014	382.5	439.5	1098.6	998.8	505.333	437	539	450	266.667	304	473.667	559	431.667	488	528.333	584	1109.33	1329.67	0	muscle_CE
AI837181		737	864.667	529	638	577.667	658.5	1573.4	1541.8	542.667	558	397.333	356	212.333	234.667	322.333	424	344	322.333	383.667	336.667	1524.67	1748.67	0	muscle_CE
AI987944		223.5	225.667	247	275.667	224.667	253.667	311.2	274.4	551	465	429.667	365.667	300.667	361	254.667	411.333	248	361.333	233	246	453.667	637	0	muscle_CE
Aida		442	475	611	777.667	471.5	550.333	737.8	659	718.333	641.333	440.667	380	124.667	139	474.667	432.667	590	475.667	389.333	396.667	876	1172.33	0	muscle_CE
Aif1		60	64	56.6667	52.3333	222.333	273.667	127.4	117.8	880.333	858	158	134.333	59.3333	68.6667	126.667	136.333	212.333	222.667	38.3333	33.6667	45	90.3333	0	Spleen_CE
Aifm1		505.5	541.333	350	427	793.833	1001.5	929.6	959.4	508	544.667	1209.67	1149.33	1716.67	2045.33	515	877	604.667	846.667	3032.33	2927.67	2257	2656.33	0	BAT_RT
Aifm2		181.5	213	289.667	314.667	227.5	230	497.2	468.2	110.667	111	257.333	235.667	460	425.667	2949.67	2934.33	3647.67	3609	8990	9577	972.667	1648.33	0	BAT_CE
Aig1	lipid_GO	1098.5	1267.33	877.333	1086.67	45.8333	62.3333	766.2	713.8	320.333	318.333	1231.33	975.667	232.667	213	222.333	413.667	175.667	205	518	611.333	292.333	311.667	0	Brain_CE
Aim1		52.5	55.3333	40	63.3333	657.5	746.833	66.6	43.8	1658.67	1399	5650.33	4717	623	620.333	307.667	906	471.333	388.333	292.333	280.667	114.667	198	0	Ileum_RT
Aim2		24	24.3333	48.3333	57	764.833	850.167	192	176	1149.33	986.667	582	456.667	17.6667	23.6667	87	71	168.667	202.333	21.3333	17.3333	21.6667	25.3333	0	Spleen_CE
Aimp1		818	845.333	695.333	824	658	831.833	1210	1285.4	894.333	834.333	1039.67	950	371.333	543.333	478	886.667	507.667	549.333	628.333	580.667	3492.67	3841.67	0	muscle_CE
Aimp2		394	474.333	252	304	371.833	507	537	536.4	289.333	344.333	363	334	153.667	170.333	129.667	200	157	140.667	223.667	192.667	8285	8048	0	muscle_RT
Aip		1074.5	1073	563	750	1616.67	1783.5	2602.2	2649.2	605.667	613.333	308.667	310.667	219.333	246.667	411.667	409.333	495	382	547	681.667	3513.33	3593.33	0	muscle_CE
Ajuba		38.5	56.3333	62.3333	50.6667	27.1667	35	96.8	104	129.667	127	81.3333	63	277	263.333	238.667	518.333	218.333	139.667	255.333	217.333	131	171.333	0	VAT_CE
Ak1		2328	2503.33	1448.33	1702.33	39.1667	50.8333	3204.6	3097	170.667	175.667	71	56.6667	14	11.6667	176.333	414	415.333	453.667	2437.67	1870.33	78717	78059.3	0	muscle_RT
Ak2		272.5	321	289.667	329.667	2287	2430.83	637.4	673.2	1072	1193	3497.67	3192	2719.33	3334.33	3084.67	3308.67	3844.67	3737.67	5219.33	5515.67	1129	1881	0	BAT_CE
Ak3		2036	2453.67	1837	2149	1147.5	1465	4360.8	4189.6	1682	1663.33	5090	4702.33	7222.67	8118.33	4255.33	5458.33	3813.33	5437	9538	9131.33	4261	5108.67	0	BAT_RT
Ak4		591	786	716	699	45.6667	52	761.8	799.8	5	7	49	71	784.333	821.333	26.6667	169.333	26.6667	57.3333	47.3333	262.333	289	278.333	0	Liver_CE
Ak5		2203	2559	694	908.333	6.5	12.3333	1581.4	1605	29	25.6667	13	16	6.33333	8.33333	26.6667	38.6667	24.3333	22.6667	11.6667	7.33333	8.66667	10.3333	0	Brain_CE
Akap1		1092	1186	745.667	861.333	251.667	334.5	969.2	902.8	274.333	299	1395.33	1128.33	2489.67	2857.33	1070	1737.67	1768.33	2144	12640.3	7363.67	5246	6471.67	0	BAT_RT
Akap10		872	1039.67	853	1004.67	1107.67	1297.33	1060.2	1056.2	1540.33	1473.33	1410.33	1141	422.333	447.667	663.667	913.333	772.333	862.667	1040	1001	543.667	746.667	0	Spleen_CE
Akap11		8043	9612.33	8672.33	9953.33	1508.5	1732.17	7773	7515.4	2394.33	2217.33	3635.33	3001.67	1381	1509	2063.33	2819.33	1582.67	1489.67	1456.67	1172	1553.67	1877	0	Hypothalamus_RT
Akap12		1821.5	2074.67	2176.33	2606.33	1331.17	2252.83	4988.6	5119.2	1965.67	1783.67	737	469.333	105.667	151.667	2542.67	2221.67	2165	993.333	1024.33	1090.67	802.667	1334.67	0	Spinalcord_CE
Akap13		664	899.667	1464.67	1749.67	10727.2	12328.3	1547	1507.8	12977.3	12277	10995.7	9645	3375	3213.67	3966.67	4553	4736.33	4010.33	4281.67	2620.33	4490.33	5303.33	0	Spleen_CE
Akap17b		566	673	951	1097.33	135.167	175.5	851.6	821.4	222.333	213.667	245	183	155.667	165.333	150.333	228	114.333	107.333	117.333	95.6667	225.667	351.667	0	Hypothalamus_RT
Akap2		1712.5	1987	1819.67	2357.33	158.833	213.167	3758.6	3599	1196	1070	521	393	308.667	308.667	2201	1774.67	1813.33	1449	3263.67	2445.33	2982	3518.33	0	Spinalcord_RT
Akap5		1870.5	2250.67	640.667	776.333	92.8333	120.333	445.6	389.6	189.667	152.667	64.6667	36	79.3333	70.3333	74.3333	65	68.6667	92	128.667	136.333	63.3333	53	0	Brain_CE
Akap6		9879	12349	11048	12813	5.5	10.8333	8775.6	8678.4	31.3333	33.6667	330.333	200	18.6667	9	101.333	60	78.6667	43	301.333	145	3988.67	4357.33	0	Hypothalamus_RT
Akap7		1652	1772.33	1089.33	1316.67	401.333	519.667	749.2	693.8	474.333	491.667	1277.67	1095.67	119	146	983	1229.67	1098	1316.67	1622.67	1774	373.333	540.333	0	BAT_CE
Akap8		726	909.333	1941	2344	2580	2942.33	2979.6	2677.6	3275.33	3032	1946	1698	666.667	732.333	1053.33	1721.67	1322	1611.67	1512	1128.33	1843	2456	0	Spleen_CE
Akap8l		971	1251.67	2370.67	2740.33	1307.67	1422.83	2562	2395	1400.67	1400.67	812	634	504.333	552	925.667	1501.33	1119.67	1117	829	678.333	1816.33	1898.33	0	Hypothalamus_RT
Akap9		3983.5	4595.33	6461.33	7669.33	1311.33	1420.67	3672	3578.6	3846	3262.67	10228.3	8821	2426.67	2594	2424.33	4159.33	2630	2721.67	3952	3199.33	3924.33	5295	0	Ileum_RT
Akip1		54	56.6667	46.6667	55.3333	323.167	416	124.2	109.6	168.333	205.667	140.667	135.667	213.333	284.667	205.333	212.667	179.667	149.333	239.333	186	363.333	380.667	0	Bonemarrow_CE
Akirin1		588	780	568.667	653.333	731	827	761.8	778	838.333	822.333	847.333	750.333	345	320.333	416	600.333	376	631	666.333	807	1385.67	1753.33	0	muscle_CE
Akirin2		704	891.333	661.333	782.333	1105	1290.83	1075	1029.4	756.667	726.333	695.667	590.333	306	333.667	395.333	521.667	399	424	482	441.667	946.333	1190.67	0	Bonemarrow_CE
Akna		84.5	98	133	155.667	6950	7396.83	215.8	216.6	5092.33	4940	967.667	606	66.6667	95	314.667	271.667	857	1082	171.333	153	132	217	0	Bonemarrow_CE
Akr1a1		6060	6643	4069.33	4701.67	4166.83	5032.5	8676	8461.8	3823.67	3980.33	9766.33	9439.67	6439.67	7409.33	4505.67	7711	4874.67	3918.67	4942.33	5235.33	7358	8940.67	0	Ileum_RT
Akr1b10		363.5	391	321.667	385	215.833	267.5	986.6	948.8	482.333	453.333	237.667	171.667	34.6667	30.6667	372.667	561.333	324.667	487	1114	1551.33	3133.33	3184.33	0	muscle_CE
Akr1b8		20	18	25.3333	17.3333	9.83333	14.5	58.4	56.2	132.333	111.333	284.333	177	35.6667	43.3333	172.333	174.333	268.333	280.333	238.333	390.667	95.6667	192.333	0	BAT_CE
Akr1c14		45.5	46.3333	40	45.6667	10.5	9.5	76	55.4	30.3333	30.6667	1336.33	1389.33	8215.67	10207	54.6667	79.3333	90.6667	126.333	53	75.3333	59.6667	99	0	Liver_CE
Akr1e1		463	490.333	404	474.333	124.667	165	736.2	683.8	200.667	178.333	608	590.333	696.667	834.333	445.667	626.667	426.667	520.667	674	718	842.333	933	0	muscle_CE
Akr7a5		480.5	454.667	372.333	414.667	154.833	205.333	715.6	691.4	375	369.333	872.667	890	2486.67	3044.67	394	1443	429	479.333	1077.33	1287.67	1611.33	1576	0	Liver_CE
Akt1	lipid_GO	3357.5	3650.33	2161.33	2638.67	4467	5159	5847.2	5836.6	2387.67	2482.33	2142	1870.33	1017	1120.33	1366	1742	1637	1352	1979	1823.67	3398.33	4291.33	0	Spinalcord_RT
Akt1s1		693.5	740.667	530.333	637.333	366.5	474.167	989.8	997.6	515.333	526	623.667	595.333	707	769.667	554.333	849.667	685.333	677.667	1126.67	1068.67	4976.33	4789.33	0	muscle_RT
Akt2	lipid_GO	984	1088	460.333	491.667	1187.33	1355	892	823.2	899.667	861.333	609.667	574.333	779.333	932.333	1734.33	1676.67	2393.33	2162.33	4373.33	4095.33	16931	17027	0	muscle_CE
Akt3		5316	5884.33	2869.67	3449.67	1013	1114.5	4100.4	3873	1674.33	1490	572.333	368.667	73.6667	113.333	613.333	728.333	572.333	582.667	345.667	453.667	444	606	0	Brain_CE
Aktip		2671.5	3005.67	2141.67	2514.67	264.5	314.667	5042	5146	518.333	427.333	1031	974.333	230.667	256.333	896.667	1806.33	722.333	739.667	1084.67	1225	2699	3153.67	0	Spinalcord_CE
Alad		497	505.333	338	405.333	5172.67	7163	868	848.6	1293	2063	619.667	543	1971.67	2463.67	933	1876.67	768.667	767	1125.33	1143	1242.33	1221.33	0	Bonemarrow_CE
Alas1		1540	1794	855.667	1043.67	2798.67	2661.33	1457.4	1398.4	694.333	716.667	2318	1945.33	4396.33	4987	3897.67	3955.67	3459.67	3003.33	7145.33	5310	6926.67	8076.67	0	muscle_CE
Alas2		213.5	339	440.667	426	50629.3	78592.5	299.6	585.4	11339.3	14123.7	135.333	131.333	2046.67	2569	598	738.333	479	683.333	500	604.667	438.667	727	0	Bonemarrow_CE
Alcam		3419.5	4136	4014.67	4718	587.5	548.667	2715	2425.4	933	832.333	1164.67	810.333	1099.33	1446.33	1208.67	2293	870.333	1039.33	95.3333	110.667	28	60	0	Hypothalamus_RT
Aldh16a1		225.5	218	120	144.333	1174.17	1328.67	320.4	301.4	880.333	912	2241	1983	1227.33	1429.67	269.333	368.667	368.667	348.667	506.333	627	476	516.667	0	Ileum_RT
Aldh18a1		809	872	584.333	696.333	1027.33	1401.33	802.2	781.2	1049.67	1222	2149	1872	30	49.3333	172.667	318	277.333	177	86.6667	83.3333	405.667	435.667	0	Ileum_RT
Aldh1a1	marker_Ther	2482	2546	1251	1635	2606.33	3600.5	6585.4	6319.4	971.333	1356.33	3251	4383	24257	24708	3955	8233.33	1535	995.333	508	328	6109.33	6292	0	Liver_CE
Aldh1a7		14	22	12.3333	22.6667	301.833	470.833	61	47.4	101.667	124.333	366.667	464	4022.33	4082.33	1342.33	3325	1880.33	2833.67	1703	2067	46	430.333	0	Liver_CE
Aldh1l1		2062.5	2309	1481	1683	60.3333	77	2330	2458	105.333	138	3405.67	3181.67	30343	33897	2678	4548.33	4569	3813.33	1953	2563.33	610.333	1027.67	0	Liver_CE
Aldh2		1843	1922.67	1564	1773.67	13207	13098.5	3406.4	3337.4	3682	3758.67	3018.67	2783.67	23749.7	29460.7	8187.67	11181.7	10361.3	8044	9465.67	8527	6251.33	8826	0	Liver_CE
Aldh3a2	lipid_GO	1338.5	1500.33	957	1167.67	1453	1438.17	2266.8	2109.2	1038.33	917.667	3452.33	3436.33	7836.33	7590.33	743.667	1567.33	716.667	647.333	908	984	781.333	920.333	0	Liver_RT
Aldh3b1		130	123.667	79	113.333	1714.33	1609.5	185.8	160.6	487	541.333	548.667	611	43.6667	60	169	115.667	171.667	98	57.6667	50	95.3333	116.333	0	Bonemarrow_RT
Aldh4a1		736.5	769.333	736.667	801	547.167	599.833	1284.6	1154	426.667	439	768	969	8901.33	9088.33	808.667	1791.33	1509.67	1465.67	3830.67	3616.67	7688.33	7881.67	0	Liver_CE
Aldh5a1		1835.5	2144	2422	2876.67	24.1667	27	4114.2	3971.2	52.3333	52	576	470.667	1464	1560.67	586.333	859.333	741.667	746.333	1096	973.667	780.667	988.667	0	Spinalcord_RT
Aldh6a1		1285.5	1481	1321	1631.33	217.833	252.667	2824.6	2535	387.667	347	698.667	575.667	7885	8687	10131.3	12472	9710	8310	15631.7	9282.67	7150.67	8465	0	BAT_RT
Aldh7a1		2141	2260.67	1506.67	1767.67	195.167	262.167	2498.6	2478.2	302.667	308.667	281.667	228	10137	11648.3	950.333	1214	1000.67	643.667	972.333	888	1956	2020.33	0	Liver_CE
Aldh9a1		443.5	481	557	720.667	1628.33	1965.17	1924.6	1830.4	733.333	832	5605.67	5069	3963.67	4246.33	757	928	1052.33	1135.33	2146.33	2663.67	550	768	0	Ileum_RT
Aldoa		33455.5	39680	15542.3	18516	8228.17	8342.83	28962.6	29444.2	3954.67	3898	7536.33	7447.33	1559	1547	9525.33	14419	15139	27014.3	49926.3	106770	1177654	994591	0	muscle_RT
Aldob		9.5	15.3333	102.667	89.6667	22.8333	42.5	177	86.8	21	52	18848	20436.3	57907.7	66785.7	53.6667	51	18.6667	40.6667	53.3333	7.33333	10.6667	6	0	Liver_CE
Aldoc		33831.5	34819.7	15483.7	18352.3	41	46.6667	52761	49650.6	66.6667	68.6667	111.667	147	260	295.333	25.6667	298	39.6667	10.3333	29	29.6667	13	24.3333	0	Spinalcord_RT
Alg1		396	414.333	306	368.667	315.667	381	688	666.6	355.333	358.667	209.667	202.667	233.667	310.333	229.333	374.667	286.667	282.667	450	399.333	649.667	737	0	muscle_CE
Alg10b		565	784.333	579.667	678.667	751.833	885.333	617.8	536	723	648.667	1037.33	862	777.667	755.667	807.667	877.333	618.333	704	748.333	757.667	715.333	1004.33	0	Ileum_RT
Alg11		742.5	861.333	1040.67	1241	250.167	338.333	1362	1265.2	606.333	517.333	1005.33	869.333	695	765	420.333	674.333	406	501.667	430.333	419.667	373.667	449.333	0	Spinalcord_RT
Alg12		315	317.667	206.333	239.333	222.5	257.667	468.8	438.4	333.333	318	397.667	381.667	177.333	210.333	179	257.667	200.333	245.667	231	278	261	317.667	0	Spinalcord_RT
Alg13		222.5	267	196	201.333	226.167	242.333	244.6	239.6	257	242.667	257.667	205.667	143.333	141	186	244.333	165.333	234	208.333	187	186	258.667	0	Brain_CE
Alg14		260.5	283.667	168	184.667	114.5	144.833	375.4	349.6	162.667	159.667	265	258.667	220.333	288.333	329.333	332.667	274.667	336	509	625	328.333	387	0	BAT_CE
Alg2		1647	1921.67	1440.67	1682.67	466	565.667	4970	4687	435	407	418	372.333	260.333	181.333	250.667	358.667	315.333	284	230.667	227.333	944.333	935.333	0	Spinalcord_RT
Alg3		153.5	180	105.333	106	161.667	202.667	310.4	278.4	130.333	138.333	142	106.667	156.333	156.667	71.6667	107.333	87	90	154.333	139	881.333	842.333	0	muscle_RT
Alg5		245	228.333	197.667	261	348.333	400.667	476.8	449	308.333	314.667	645	673.333	411.333	485.667	358	526	367.667	497	488.667	491	490.333	615.667	0	Ileum_CE
Alg6		204.5	253.667	366.333	419.667	264	313.5	306.4	266.8	323.667	299.667	673.667	471.667	192.333	191.667	234.667	345.333	211.667	215.667	165	183.333	273.667	322.333	0	Ileum_RT
Alg8		81	90.3333	105.333	111.333	444.167	541.167	192.4	175.8	237	217.333	334	288.333	105.333	108	91.6667	150	94	87	59	52	189	207.667	0	Bonemarrow_CE
Alg9		598	563.333	530.333	648	383.5	504.833	668.4	538	411.667	413.333	846.333	736.333	348.667	395	455.667	584.667	510.333	493	731	622.333	482.333	494	0	Ileum_RT
Alkbh1		223	254.333	485	549.333	338.5	395.667	284.8	286	1108	1087	767.333	649.333	220.667	272	370	620	405	498.333	411.667	293.333	184.333	262	0	Spleen_CE
Alkbh2		44	42.6667	37.6667	44	55	75.5	105.4	102.6	41	50.3333	29.6667	26	30.6667	39.3333	29.6667	52.3333	30.6667	35.3333	46.6667	37.6667	27	33.6667	0	Spinalcord_RT
Alkbh3		209	228.333	306.333	376.333	303	333.667	387	355.4	405.667	394.667	469.667	387.333	346	399.667	459.667	548.333	449.333	577.333	901.333	1109.67	1590	1747.33	0	muscle_CE
Alkbh4		159	191.333	87.3333	106	328.667	347.667	159.6	159.8	235.667	279.333	220	210.333	65.3333	85	78	106.333	83	96.6667	108.667	79.6667	181.667	220	0	Bonemarrow_CE
Alkbh5		1113	1424.33	1376	1546.67	2186.17	2660.67	2297	2382.4	1684.33	1752.33	2653.33	2348.33	2349	2043	1529.33	1826	1670.67	1477.33	2141.67	2248	9970.33	10647.7	0	muscle_CE
Alkbh6		654	695.667	433.667	535.333	127.667	159.5	776.2	723.6	294.333	279.667	300.333	272.667	173.333	211.667	195.333	384.333	238.667	265	402	468.667	595.667	610.667	0	Spinalcord_RT
Alkbh7	lipid_GO	357	387.667	220.333	302.667	95.5	113.167	355.6	373.6	141.667	128.333	208.667	186.667	200.333	245	97.6667	187.667	139	174	562.667	544	672	624	0	muscle_RT
Alkbh8		769.5	906.333	1109	1341.33	432.667	530.833	365	347.4	778	914.667	562	447	295	279	370	480.667	364	420.333	533	478	407	463	0	Hypothalamus_RT
Alms1	marker_Ther	771.5	951	1368	1572.33	696	845	449.4	400.8	960	1132	1018.33	876	180.333	191.667	428.667	673	475.333	443.333	277	200.333	43.6667	80.3333	0	Hypothalamus_RT
Alox12	lipid_GO	16.5	19	24.3333	22.6667	2654.33	3325	25.8	27	304	422.667	25.3333	21.3333	15.3333	25	80.6667	262	33.6667	57	43	120	101.333	154	0	Bonemarrow_CE
Alox5		24	20.3333	49	55.3333	3583.33	3229.83	44.2	35	73.3333	120	103	67.6667	11	10.6667	149.667	245	210.333	152.333	48.6667	46.6667	87.3333	163.667	0	Bonemarrow_RT
Alox5ap		75.5	67.6667	47	58.3333	6080	5259.83	132	114	517.667	644.667	70.3333	49.6667	24.6667	29.3333	220.333	192.333	301	191.667	68	50.6667	165	331.333	0	Bonemarrow_RT
Alpk1		56	73.3333	85	93	399.167	399.833	261	218.8	422	361.667	1102.33	1123.67	51.3333	65	229.667	318	242.667	202.667	75	65	93.3333	122.667	0	Ileum_CE
Alpl		260	274	240	275.333	87.5	145.167	458	411.8	129	110.667	33	19	318.667	356.667	72	1195.67	58	54.6667	433	1018.33	743.667	870.333	0	VAT_CE
Als2		1953	2162.67	1212.67	1410.33	493.833	559.833	1482.4	1551.6	615	580.667	1027.67	584.333	3183.33	3279	458.667	620	555	487	701.333	637.333	1703.67	1718.33	0	Liver_CE
Als2cl		190	200	605	657.667	157.333	211	1435	1261.2	1200	1128.33	772	519.333	930	966.333	517.667	627.333	783.667	1623.33	903.333	1879.33	545.667	896.667	0	BAT_CE
Alyref		735	827	637.667	775.667	1285.33	1616	379.6	377	1272.33	1478	1189	1169.33	253.333	322.333	474.333	751.333	517	503.333	475	413.667	373	475.333	0	Bonemarrow_CE
Alyref2		88.5	88	83	97.6667	90.3333	117.167	110.8	106	150.667	123.667	94.3333	103	56.3333	78	43.6667	71	50.6667	50.3333	43.3333	52.6667	68.3333	87.6667	0	Spleen_CE
Amacr		238.5	261.667	177.667	196.667	42.1667	59.1667	308	334	103.333	99.3333	262.333	244.333	3177.33	3719.33	159.333	256.333	203.333	256.333	788.667	853.667	1065	1083	0	Liver_CE
Ambra1		1600	1682.33	1713.33	2053	1137.5	1337.33	2324.6	2218.2	1533.67	1464.33	1842	1458	744.333	722.333	738.333	1087.33	881.333	727.333	793	644	1707.33	1922	0	Spinalcord_RT
Amdhd2		266	289	350.333	420	480.333	481	396.8	376.2	397.333	356.667	1148.33	898.667	267.667	344	284.667	393.667	345	365.667	351	336.667	310.667	372	0	Ileum_RT
Amer1		290	334	403.333	482	352.167	424.667	803	782.6	519	466	501	380	233.667	223.667	695.667	793	750.667	769	514.333	407.667	955	1263.67	0	muscle_CE
Amfr		4238.5	4928	3215.33	3819.33	4409.17	5100.17	5667.8	5467.6	2919	3229.67	3695.67	3323.33	6688.67	7541.67	2852.67	3960	2921.33	2687	4017.67	3954	10391.3	10252	0	muscle_RT
Amigo1		1370.5	1695.33	1381.33	1513.33	130.333	163	2987	2860.2	176.667	153.667	260.333	202.333	159.333	152.333	165	211.667	201.333	184.333	457.667	334	3387	3335.33	0	muscle_RT
Amigo2		365	450	1317.67	1455	52	62.8333	386.6	388.4	197.667	184	73.3333	47.6667	86.6667	101.333	179	289.333	162.667	122.667	110.667	92	120	164	0	Hypothalamus_RT
Amigo3		61.5	73	124.333	127	38	45.8333	36	26.6	300.333	359	295	292	86	64.3333	98	189	101.667	109	105	85.6667	183.333	155	0	Spleen_RT
Ammecr1		56.5	74.3333	172.333	182.667	646.333	813.667	49.4	45.4	514	626.333	557.333	466.667	48.3333	43	159.333	157	171.333	159.667	81.6667	79.6667	111.333	114.333	0	Bonemarrow_CE
Ammecr1l		417.5	572	673.333	766	1132	1282.33	1492.6	1402.6	900.333	894.667	1487.67	1222.67	1291	1236.33	676.667	770.667	726.333	742	1062.33	928.333	732	985.667	0	Spinalcord_RT
Amn1		296.5	308.333	735.333	911	67.3333	72.8333	242	209.8	1263	1061	1673.67	1281.33	561.667	727.667	1108.67	1211.33	1003.67	1083	724.333	767.667	119	169	0	Ileum_RT
Amot		963	1100	961	1092.33	104.5	116.333	1398.4	1331.4	114.333	116	1491.67	1109.67	242	239.333	518.667	1458.33	364	231.667	374.667	250	4796	6022	0	muscle_CE
Amotl1		1619.5	1837.33	3956	4376.33	108	144.167	2296.4	2266	1071.33	977.667	648.667	534	425	480.667	4682	5502.67	6280.33	4872.67	5308.67	4795.67	39820	43273	0	muscle_CE
Amotl2		575.5	696	892.667	977.333	189.667	221	1304.8	1395.8	660.333	726.333	454.333	420	939.667	909	6483.33	2319	5062.67	1888.67	2504.33	1413.33	717	1391.33	0	VAT_RT
Ampd2		1365	1426.33	2120	2364.33	1462.67	1476.83	3209.8	3246.4	601	608.667	819.667	750	560	674.667	278.667	430.667	448	477	918.333	539.667	320	488.667	0	Spinalcord_CE
Ampd3		332.5	373	585.667	685.667	3139	3785.83	1239.2	1109.6	738	879.333	810.333	641	43	47.6667	641	524	444.667	486.667	831	1525	714.667	919.667	0	Bonemarrow_CE
Amt		510.5	561.667	674.667	777.667	10.8333	14.3333	666.4	696.4	128	113	141.667	136.333	1290.67	1683	181.333	516	125	154	138	104	65	113.667	0	Liver_CE
Amy1		89.5	121.667	787.333	904.667	23.8333	33.3333	944.8	918.2	19	13.6667	25.6667	57	2595	3685	2448	2823	5880.33	6252	4102	2670.33	1391.67	2136.67	0	SAT_CE
Amz1		257	265.667	360.333	410.333	140.5	158.667	204	184.8	423.333	457.667	100.333	85.3333	14.6667	16.6667	42.6667	35	69.6667	42.3333	23.6667	29.6667	17.3333	18.3333	0	Spleen_RT
Amz2		748	886.333	823	912	557.167	632.167	1444.4	1383.2	482.667	485	624	524.667	250	285.333	594	815.333	656.667	690.667	1010	952.667	4736.33	4620.67	0	muscle_RT
Anapc1		2209	2671.67	3564.33	4143.33	3780.17	4610.17	3413.8	3030	4312.33	4219.67	4571.33	3887.67	1600	1694.67	2494	3275.67	2773.67	2616.33	3516.67	2862.33	2897.67	3571.67	0	Bonemarrow_CE
Anapc10		204	224.333	227	257	139.667	170.167	313.6	274.2	217.667	191.333	176.667	154.333	66.3333	70.6667	202	277	171.333	249.333	203.667	223.333	179.667	229.333	0	Spinalcord_RT
Anapc11		801	895	568.333	647	513.833	584.167	1347.2	1430.6	536.667	527.333	345.333	336.667	195.667	228	357.667	429.333	424	372.333	450.667	414.667	904.667	1079.67	0	Spinalcord_CE
Anapc13		358	356.333	185	253.333	386.833	432.833	642.8	660.6	265.333	274.333	421	423.667	358.333	418	418.667	694.667	416	555.333	1050	1129.33	1595	1690	0	muscle_CE
Anapc15		121	147	143.667	179.333	284.333	334	225.8	213.6	135	123.333	81.3333	64.6667	55.3333	63	85.6667	105	88.3333	81	89.3333	102	501.333	455.333	0	muscle_RT
Anapc16		813	884	748	795.667	592.167	751.333	1160.2	1157.6	989.667	957	703	657.333	459	463.667	794.667	939	656	749.667	789.667	788.667	1364	1778.67	0	muscle_CE
Anapc2		1396.5	1501.67	873.667	1052	1869.83	2255.5	3697.2	3660.6	702.667	700	1061.33	909	521.667	529.333	591.333	563.667	715.667	438.667	473	464	2383	2284.67	0	Spinalcord_RT
Anapc4		1257	1357.67	1363.67	1571.33	884.667	1057.33	1765.6	1713	1032	919.333	1018.67	874.333	330	441.333	881	1209	896.333	861	864	744	1862.33	2069.67	0	muscle_CE
Anapc5		3863.5	4276.33	3960.33	4636.33	6410.67	7993.67	4643.6	4604.2	4522	5031.67	3077.33	2541.67	1263	1487	2853	3482.33	3099.67	2655.67	3690	3115	34010.3	33962	0	muscle_RT
Anapc7		707.5	771.333	586.667	658.667	940.667	1201.33	991.2	949.6	686.333	725	656.667	542.333	361.333	390.333	341.333	531	416	384.667	590.667	521.333	982.333	1048	0	Bonemarrow_CE
Ang		18.5	23	25.6667	33.3333	27.8333	41.8333	62.2	53.4	27.3333	31.6667	510	516.667	2948	3310	84	128.667	144	115	39	33	70.6667	129.333	0	Liver_CE
Angel1		177	176.667	100.667	131.333	61.5	65	864.2	804.2	101.333	87.3333	72	41	59	66.3333	86	79	71.6667	65.6667	69	88.6667	726.667	610	0	Spinalcord_RT
Angel2		933	1058.67	816.667	1035.67	1091.83	1354	1198	1141.2	1469.33	1437	1896.33	1702	436.333	447	869	1269.67	886.333	1136.67	1249	1596.33	1513.33	2016.33	0	muscle_CE
Angpt1		245	249.667	281.667	341.333	571	751	314	287.2	323.667	319.667	34.3333	38.6667	20.6667	13.6667	1365	1159	1076	1185.67	963.667	377.667	502.333	728	0	VAT_RT
Angpt2		60	60	150.333	160.667	14.1667	22.6667	52	52.4	499.667	438	234	190.333	41	43	120.333	217.667	160.333	187.333	103.333	63.6667	59	77.6667	0	Spleen_CE
Angptl1		24	21.6667	99	107.333	21.5	28.1667	39	26	766.333	573.667	378.667	309	23.6667	29.6667	61	125.667	151.333	208.333	303.667	146.333	395	712	0	Spleen_CE
Angptl2		175	226.667	567.667	663.333	63.6667	64.1667	232	194.4	1129.67	1028	579.667	406.333	364	416	1625.33	1533	3536	1302.33	2702.67	1694.33	3778.67	5008.67	0	muscle_CE
Angptl4		82	72.6667	83	115	163.333	235.833	74.6	52.2	446	449.333	462.333	817.667	1721.67	1831.33	5475.67	4398.67	6875.67	3232.67	7860	3777.33	560.667	607	0	BAT_RT
Angptl6		82	90.3333	62.6667	81.6667	12	17.5	142	137.6	12.6667	15.3333	16	16.6667	166.667	215.667	17.3333	25.6667	27	38	40.3333	51.3333	307.667	227.333	0	muscle_RT
Angptl7		8.5	16	75	75	14.6667	18.8333	10.4	5.4	100	92.3333	52.3333	37.3333	25.6667	30.6667	42.3333	74.6667	41.6667	51	67.3333	56	630.667	744.333	0	muscle_CE
Ank		3629	4485	2074	2530	1856.83	2886.17	8264.4	7882.2	895.667	895.333	1396.67	1116	512	552	419.333	766.667	803	1446.67	3047.33	3717.33	12072.7	13562.7	0	muscle_CE
Ank1		2551	3001.67	1835	2137.67	14215.2	20253.2	10112.4	10765.4	2948	4485	38.6667	39.6667	6	6.33333	203.333	33	112.333	56	330.333	181.333	24330.7	25316.7	0	muscle_CE
Ank2		20348	25588.7	25618.3	30021.7	21.1667	32.8333	22152.6	21210	447.333	435.333	566.667	389	140	128.333	962	1117.67	999.667	947.667	1557.67	1250.67	2837.33	3113.33	0	Hypothalamus_RT
Ank3		9786	12232	14672	17130	136.333	174.5	9426.8	9219.4	287	291	2781.33	1718	651.667	679.333	700	1413.67	186	123.667	438	215	5690	6917.67	0	Hypothalamus_RT
Ankfy1		1401	1672.67	1944.33	2207	3785	4258.67	2236.8	2009.8	3647	3483.33	4848.67	4040.33	1165.33	1206.67	1468	1976	1705	1338.33	1267.33	1161.67	961.333	1385.33	0	Ileum_RT
Ankhd1		1661	2038.67	2167.67	2427	2677.5	3158.83	2488.8	2397.2	4267.33	3814.33	4753.33	4032	1462	1494.33	1684.33	2413.33	1968.33	1964.33	2292.67	1948	2396.33	3029	0	Ileum_RT
Ankib1		5657	5895.67	3274.67	3922.67	958.5	1093.5	2285.8	2167.2	2185.67	2069.67	3729.67	3541	967.333	963.333	1275.33	1684	1365.33	1377.33	1633	1575.67	864.333	1030.67	0	Brain_CE
Ankle2		982.5	1267.67	1268.33	1452.67	1821.33	2032.67	1178.2	1128.4	2559.33	2370.67	1419	1099	890.667	1019.33	971.667	1391.67	1200.67	1018.33	1298.33	960.333	1603.67	2010	0	Spleen_CE
Ankmy2		976	1191.67	863.333	1011.33	280.167	380.833	1166.2	1182	613.667	587	960	760.333	169.667	222.333	461.667	686.333	524.333	421.333	518.667	525	402	449	0	Brain_CE
Ankra2		1297	1304.33	634.333	746.333	407.333	451.333	621.6	589.2	458.667	404.667	546.667	466.333	166	209	273.667	417.333	262	268	236.333	214	448.667	574	0	Brain_CE
Ankrd10		453.5	560.667	1741.67	1823.67	962.667	1108.33	1153.2	1184.8	2036	1915.67	1419	1203.33	263	272.333	730	1451.33	712	946	919.667	792.667	959.667	1287.33	0	Spleen_CE
Ankrd11		3593.5	4476.67	5629	6838	4282.83	5281.17	6200.6	6342.2	7091.67	6685.33	6668.33	5295	1746	1871	2907	3642.67	3634.67	3574	3393.67	3037.33	5635	6805.67	0	Spleen_CE
Ankrd12		4300	4677	3041.67	3688	1456.17	1496.67	1491.2	1414.2	1924.67	1629.67	1591.67	1313.67	151.667	150.667	916.333	1161	936.333	835.667	825.333	545	474.333	585.333	0	Brain_CE
Ankrd13a		1003.5	1119.67	928.333	1103.33	7784.83	8942.67	2474.6	2390	4126.33	4465.33	5845.33	5246	542.333	579	1138	1380.67	1327.33	1310	1670.33	2071.67	1233	1510	0	Bonemarrow_CE
Ankrd13b		601	611.667	383	491	121	159.5	1491	1456	42	45.3333	115	100	23	14.3333	52	61	69	47	45.6667	39	794	968.667	0	Spinalcord_RT
Ankrd13c		1213	1541.33	1269.33	1503	782.333	927.167	1147	1198	1566	1443.67	2432.33	2204	822.667	856	1364.33	1959.33	1142	1471.67	1753	1895.67	687.667	959	0	Ileum_RT
Ankrd13d		710	805.667	1063.67	1254.33	328.833	334.333	1746.8	1717	131.333	124	42.3333	32	12.3333	10	50	118.667	60	46	26.6667	29.6667	12	24	0	Spinalcord_RT
Ankrd16		162	188.333	640	833	447	458.833	573	507.2	930.667	868	1211.33	914.667	269.333	284.333	744.667	959.667	736	837.333	621	496.667	620	760.333	0	Ileum_RT
Ankrd17		2953	3812	5588.33	6306	3151.33	3698.5	5232.2	5031.6	4622.67	4279.67	6391	4972	2276.67	2136	3346	4246	3200.33	3602	4255.67	3339.33	3798.33	4820	0	Ileum_RT
Ankrd23	lipid_GO	31	37.6667	142.667	181.667	96.1667	99.6667	229.8	219	196.667	161.333	113	80	76.3333	62	112.667	111.667	546	367.333	1801	1042.67	136812	147320	0	muscle_CE
Ankrd24		424.5	474.667	1470.67	1874.67	35.3333	49.6667	1644.8	1490.2	176.333	159.333	157	127	90	109.667	205.333	411	179	244	248	295	346.667	352.667	0	Hypothalamus_RT
Ankrd26	lipid_GO	503.5	628.333	889.667	1072	391.333	502.333	763.6	804	542.667	580	382.667	359.333	217.333	218	207.667	338.667	232.667	260.333	192	191.333	216.667	341.333	0	Hypothalamus_RT
Ankrd27		630.5	789.667	558.333	618.667	1035.33	1290.17	1280.4	1215.2	830	821	789.667	594.333	634.333	638.333	661	812.667	833	609.333	818	844.333	944	1106.67	0	Bonemarrow_CE
Ankrd28		1158.5	1308.33	1113.67	1345	2614.5	2702.33	3309.8	2991.8	804	767.667	1512	1250.33	935.333	808.667	514.667	1008.67	475	553.333	1249	1226	4333.33	5120	0	muscle_CE
Ankrd29		415	474.333	219	254	8.16667	15.3333	877.2	867.4	25	23.6667	47.3333	52	6.66667	7.66667	203	235.667	144	38	13.3333	16.6667	33.3333	45.6667	0	Spinalcord_RT
Ankrd33b		1277	1864.33	99.6667	89	706	688	76.6	73.6	194	196.333	37.6667	21.6667	1458.33	1176.33	63.6667	51.3333	122.333	135.333	266.333	185	2949.33	3760.33	0	muscle_CE
Ankrd37		76	71.3333	73	82	33.8333	44.3333	83	84.6	80.3333	54.3333	102	216	8	12	19	36.3333	19.6667	26	14.6667	15	88.6667	138	0	Ileum_CE
Ankrd39		161.5	167.333	255.667	274.667	98.6667	109.5	366.8	327.8	231.333	219.333	139	110	96.3333	104.333	161.667	179	190.667	184.667	247.333	206	333.667	499.333	0	muscle_CE
Ankrd40		2143.5	2521.33	1746.33	2085.33	1011.67	1200	6852.6	6658.8	993.333	917	1077.67	851	933	968.333	2052	1998.33	1941	2168.33	3608.33	4815.67	15411	16817.3	0	muscle_CE
Ankrd44		270	339	564	671.667	2956.33	3009.33	670.2	549.4	5076	4171.33	1254.67	773.333	155.333	206.667	1059.67	985.333	1339.67	1444	615	462.667	528	571.333	0	Spleen_CE
Ankrd46		3315	3833	2050.33	2455	766.833	852.167	6022	5872.8	506.333	463.667	781.333	620	958	1135	831	935.667	731.667	768	885.667	1115.67	1263.67	1555	0	Spinalcord_RT
Ankrd49		252.5	258	190.333	236.333	342	408.5	221.4	188.2	611.333	552.333	534.667	455	150	172	297.667	489.333	271.333	338.667	304.667	276	289	373.333	0	Spleen_CE
Ankrd50		1708	2167	2425	2673	171	214.667	1523.4	1540	1591	1405	1579.67	1508	319	336	678	888.333	915.667	864.667	1282.33	1399.67	243.333	412.333	0	Hypothalamus_RT
Ankrd52		913	1129	1020.33	1122.67	2281.5	2714.83	3554.6	3473.6	992.667	908.667	1380	942.333	751	470.667	753.333	708	699.667	644.667	1281.67	833.333	5158.67	5861.33	0	muscle_CE
Ankrd54		265.5	309.667	381	434	763.5	988.833	475.2	474.2	554.667	613.333	377	387.333	148.333	174	254.667	502	256	274.333	252.667	284.667	216.667	260.667	0	Bonemarrow_CE
Ankrd6		930	1189.67	1672.33	1883	68.3333	92	1634.4	1535.6	69	58.6667	73	50.6667	14.6667	9.33333	52	102.667	39	32.6667	49	42	177.333	164	0	Hypothalamus_RT
Ankrd9		276	345.667	169.667	203.333	480	576.167	370.8	403.8	173.333	269.667	380.333	402.667	62.3333	56	51.6667	158.333	71.3333	163.333	1830	1168	4289.67	4723.67	0	muscle_CE
Anks1		886.5	984.667	992.667	1148	1456.33	1593.33	2194.4	2152.8	987.333	1005	1199.67	1039.33	647.333	507.333	1149	1250.67	1332	1001.67	1318.33	1599	954	1115	0	Spinalcord_RT
Anks3		501.5	564.667	768.667	905.667	617.333	683.833	1010	1000.6	743.333	654	608.333	561	273	255.667	361.667	598	386	490	533	502.667	549.667	742.667	0	Spinalcord_RT
Anks6		147.5	170.667	340	389.667	12.1667	16.3333	376.8	388.4	51.6667	44.6667	102.667	75.3333	11.3333	11.6667	149.667	233.333	133.667	106	46.3333	52	92.3333	138	0	Hypothalamus_RT
Ankzf1		336.5	353	613.333	675.667	613.833	670.167	742	709.6	650	630.333	955.667	839	402	465	382	659.333	393.333	488.667	445.333	386	455.333	542.333	0	Ileum_RT
Anln		992.5	1072.67	608.667	749	3434.17	4268.67	6404	6202.4	941	1276	1033.33	952	48	28.6667	374.667	281.667	204	130	64.3333	61	99.6667	113	0	Spinalcord_RT
Ano1		104.5	134.333	157	179.333	9.16667	9.5	266.6	262.2	428.667	329.333	355	260	88.3333	92.3333	825.333	2028.67	395	224	1933.33	1486	212.333	263	0	VAT_CE
Ano10		619.5	701.667	639	731	1224.33	1062.5	1472.4	1278.2	519.667	506.333	1817.67	1700	283.333	304.667	1332	1539	1399	1049.33	1202.67	1303.33	2360.33	2084.33	0	muscle_RT
Ano6		736.5	844.667	722	819	2189.67	2570	1214.8	1081.4	2043.67	1985	2172	2126.67	253.333	291.333	1619.67	1871	1857.67	1013	1535.33	1153.67	3811.67	4522.67	0	muscle_CE
Ano8		921	985.667	1309.33	1535.33	142.333	181.833	1603.6	1655.6	393.333	362.667	341	261.667	89.6667	103	541.667	542.333	593	629.333	663.667	630.333	1145.33	1193.67	0	Spinalcord_CE
Anp32a		2600.5	2910.33	1591.67	1848.33	4352.67	5001.5	2942	2802.4	2065.67	1870.67	1328	1232.33	1168.67	1592	871.667	1214.33	1154	1445.67	1932.67	2267.33	1892.33	2372	0	Bonemarrow_CE
Anp32b		239.5	232.667	90.3333	128.333	7924.67	10423.2	1499.4	1417.8	375.333	432.333	249	211.667	100.333	107	153.667	138.667	151.333	125	115.667	108.333	3232.33	3454	0	Bonemarrow_CE
Anp32e		1173	1283	645	787.667	6759	8891.5	2894.4	2704.4	1310	1411.67	1094.67	956	271	288	450.333	496.333	418.667	397.333	543.333	563.667	3870	4401	0	Bonemarrow_CE
Anpep		74	58.6667	31.6667	30.3333	55.5	50	118.8	90.8	232	368.333	109408	89858.7	1602.33	1428	150.333	146.333	566.333	445	120.333	118.333	576.333	958.333	0	Ileum_RT
Antxr1		219	297.333	513.333	587.333	172	204.333	1143.4	1034.6	545.333	479.333	533.333	371	39	35.3333	440.333	507.667	1110.67	527.333	227.667	197.667	794.333	1264.33	0	muscle_CE
Antxr2		76	88.3333	80	81.6667	1212.33	1151.83	93.2	101	836.333	800.333	2743	2710.33	1297	1130.67	2014.33	1776.67	1744.67	1232	803	684	877.667	1509.33	0	Ileum_RT
Anxa1		42	56	62	72.3333	23892.5	21059.7	149.2	124.2	826	1023.33	356.333	372.333	59	72.3333	3856	3508.33	3267.33	2635	483.667	482.333	1000	1789.67	0	Bonemarrow_RT
Anxa11		207	238	59.6667	58.6667	2845.17	2718.67	340.6	326.4	423.667	397	1363	1395.33	265	263.333	279	278.333	336.667	242.333	303	350	8318	7984.33	0	muscle_RT
Anxa2		293	331.667	309.333	312	8915	8064	1740.8	1457.8	1628.33	1861.33	20005.3	22018.7	244.333	282.333	6983.67	7179	5882	3880	4219	5614.33	2441.33	3607.67	0	Ileum_CE
Anxa3		220.5	224.667	176	198.667	2098.33	1969	457	404.4	527.667	474.333	333.667	252.667	74.3333	106	956.667	1565	1478.67	939	359.667	379	784.333	1149	0	Bonemarrow_RT
Anxa4		115	142.667	82.3333	95.3333	289.333	310.167	316.8	271.6	609.667	535.333	14606	12685.7	755.667	977.667	1034.67	1117.67	1000.67	809.333	1030.33	831.667	608.667	768.667	0	Ileum_RT
Anxa5		1517	1708.33	1413.67	1534	2306.33	2326.33	5311.6	4831.6	1873	1624	909.333	673	1479	1510	3900.67	4312.33	5022	3668	8174.67	6519.67	1978.67	2959.33	0	BAT_RT
Anxa6		3563.5	3981.67	1628.67	1879.67	2419.17	2589	6393	6057.8	5249	4661.67	1273.33	977.667	2590	3175	6197.67	4686	7641.67	4068.67	9085	7333.33	15847.3	14856	0	muscle_RT
Anxa7		1539	1854.33	1094	1252	2179.83	2437	2063	1865.4	1600.67	1632.33	2323	1959	1565	1919	1436.33	1916.67	1801.67	1544.33	1819.67	2313	3821.33	3780.33	0	muscle_RT
Anxa9		7.5	8	68.3333	53	130.833	161.5	49.4	49.8	101.333	109.667	35	35.3333	29.3333	35.6667	145.333	281	76.6667	58.6667	45	39.6667	11	19	0	VAT_CE
Aoah	lipid_GO	5.5	6	7.33333	8.33333	848	799.167	11.6	12.2	157.667	177.667	133	89.3333	43.3333	40	109	92	197	163.333	36.6667	49.3333	19.6667	50	0	Bonemarrow_RT
Aoc2		25.5	35.6667	81.6667	82.6667	527.333	679.667	144.6	149.8	172.667	176.333	116.667	91.3333	22.6667	26.3333	62.6667	76	57.6667	69	66.3333	42	38	66	0	Bonemarrow_CE
Aoc3		6	9.66667	9.33333	12	37	54	28.4	27.8	34.3333	37.3333	261.333	229.667	15	5.66667	11776.7	6405.33	10152	4191	3832.67	2650.33	760.333	1701.33	0	VAT_RT
Aox1		157.5	177.667	215	264	9.16667	9.5	491.8	400.4	122.667	105.333	103.333	117.333	4226.67	4505.33	3860.67	3462.67	3413.33	3323.33	3198.67	3356.67	1526.67	2110.67	0	Liver_CE
Ap1ar		1233	1429.33	1153	1420	852.5	1151.17	1873.2	1804.6	821.667	845.667	2073.67	1836	460.667	442	425.667	633	465	462.333	550	448.333	1477	1610.33	0	Ileum_RT
Ap1b1		4234	4911.67	3129	3823.33	4154.5	5575.17	6965.2	7045	2162.67	2482.33	2533.67	2128.67	1305.67	1455	1049	1489	1420.33	1072.67	1765.33	1904.33	3654	4011.33	0	Spinalcord_CE
Ap1g1		2047	2652	2199.33	2499.67	2832.67	3048.5	4205.6	3999.8	2087.67	1914.67	3813.67	3037.67	2302.33	2084.67	1501.33	1832	1481	1388.67	1998.67	2049.33	2908.33	3474	0	Spinalcord_RT
Ap1g2		26	34.3333	128	143.667	826.333	968.5	172.4	161.8	718	624.333	984	850.333	112.333	109.667	193.667	218.667	302.333	358.667	425	419.667	284.667	383.333	0	Ileum_RT
Ap1m1		892.5	947	793.333	979.667	2328.17	2614	2497.2	2333.6	1094.67	1018.33	493	405.667	386.667	416.333	368.667	463.667	507.667	548.667	970.667	1005.67	1398.67	1492.33	0	Bonemarrow_CE
Ap1s1		2361.5	2512.33	871.667	1014.33	800.833	938	2884.4	2721	287.333	306.667	988.333	975	291	324.667	415.667	433.667	428.333	456.667	672	767.667	748.667	828	0	Spinalcord_RT
Ap1s2		879	1056.67	1661.33	1853.67	777.667	725.167	720.8	754.6	571	477	233.333	156.667	40.6667	40	742.333	33748.7	284	334.333	159.667	206.333	411	480.667	0	VAT_CE
Ap2a1		4370	4952.67	2735.33	3228.33	2862.5	3806	8162.2	8299.4	1060.67	1221.33	1163.33	1053.33	606.667	598.667	637.333	914	741.667	630.667	879.333	789.333	5636	5313.33	0	Spinalcord_CE
Ap2a2		7184.5	8245.67	4948	5680	4198.5	5082.83	4616.4	4581.4	2353	2714.33	5921.33	5395.33	3086.33	3187.67	3576	3880.67	4829.33	3217	3651	4691.33	5135.33	5281	0	Brain_CE
Ap2b1		9096	11131	5329	6456	3620.5	4296.67	8036.4	7840.2	3608	3396.33	4867.67	4188.33	1527.67	1648.67	1645.33	2540.67	1961.67	1356	2053	1679.33	2898	3449	0	Brain_CE
Ap2m1		1277.5	1540	845.667	982.333	666	799.5	1465.4	1429.6	455	492.667	875	754	416.667	433	292.333	360.333	311.333	298.667	341.333	263.333	4791.67	5044	0	muscle_CE
Ap2s1		2634	2882.67	1496.33	1726.67	1863.5	2057.83	2565.2	2729	950	1070.33	1366.33	1449.33	784.667	920.333	673	969.333	818.667	694	1039	1015.33	1281.67	1334.33	0	Brain_CE
Ap3b1		1210.5	1401.33	918.667	1115.33	1810.17	2079.5	1322	1197.4	1921	1816.67	2816.33	2463	1093.33	1206	983	1277.67	1174.67	932.667	870.333	773.333	1231.67	1366	0	Ileum_RT
Ap3d1		4498	5152	4795	5562	2722.5	3099.67	5027.4	5044.2	3027.33	2940.33	4050.67	3435.67	1662.67	1778.67	2314.67	3280.33	3024.33	2730.33	2959.33	3210	3041	3516.67	0	Hypothalamus_RT
Ap3m1		457	541	520.333	625.667	766.5	813.833	1191.4	1014	732	635	1196	1040.67	820.333	865	492.333	755.667	431.333	579	590.333	549	1075	1307.33	0	muscle_CE
Ap3m2		3090.5	3915.33	2315	2671.33	220.5	239.333	3107.2	3029.4	486	427.333	130.333	81	39.3333	50.3333	304.333	468.667	368.333	269.667	144.333	143	161.667	280.667	0	Brain_CE
Ap3s1		169.5	198	139.333	157.333	477	458.167	230.4	214.8	99	95	291	263.667	102	116.667	377.667	373.667	444.667	570.667	580.667	642.667	326	465	0	BAT_CE
Ap3s2		1221.5	1438.67	921.333	1113.33	680	869.667	4162	3998.2	496.333	504	751	616.333	467	472.333	364	462	441.333	393.667	512.333	537.333	2351	2698.33	0	Spinalcord_RT
Ap4b1		455.5	518	418.667	491.333	950	1146.5	590.4	586.6	715.333	729.333	622	615	396	477	373	543	421	451	597	591.667	861.667	1016	0	Bonemarrow_CE
Ap4e1		259	298	531.333	634.333	618.167	740.167	813.2	755	782.333	697.667	760.333	584	240.667	245.667	577	660.333	429.667	512	470.667	354	877.667	1014.67	0	muscle_CE
Ap4m1		247.5	297.667	321.333	363.333	437.833	533.167	305.4	262.6	441.667	453.333	552.333	464	188.333	202	536.333	542.667	484.333	570.333	520	458.333	259.333	289	0	SAT_CE
Ap4s1		832	865.667	576.333	714	251.833	286.333	756.6	788.6	366.333	348.333	278.333	290	151.667	184.667	308.667	434.667	317.333	425.333	647.667	745	1719	1757.67	0	muscle_CE
Ap5b1		143	140.333	99.3333	119.333	899.5	791.167	171.8	161.2	588.333	551.333	591.667	574.667	94.6667	111.333	129	198.333	211.333	184	164	130.667	83	80	0	Bonemarrow_RT
Ap5m1		403.5	487.333	436.667	440	488.167	573.833	688.8	620.2	714.667	678.333	872.333	757.333	305	354	360	574.333	412.333	553.333	725.667	742.333	529.667	694.333	0	Ileum_RT
Ap5s1		205.5	216	207.333	237.667	229.667	275	415.8	419.4	174.333	184	358	325	217.667	295.667	212.333	231.333	285.667	189.333	335.333	335.667	798.667	897	0	muscle_CE
Ap5z1		318.5	350.333	438.333	556.667	529.167	578.833	956	903.4	616	569.333	587.333	487	238	238.333	322.667	424	390.333	359	294.333	251.333	273.333	311.667	0	Spinalcord_RT
Apaf1		326.5	440.667	424.667	482.667	2974	3067.17	369	358.8	1508.33	1557.67	4398.67	4061.33	110	143.333	370	418.667	588.667	474.333	243	187	115.333	173	0	Ileum_RT
Apba1		3173.5	3842.67	3915.67	4552.67	487.5	450.167	6152.2	5927.2	165.667	171.667	113.667	79	11.3333	14.3333	183.667	127.333	281	109.667	79.3333	74	94.3333	150	0	Spinalcord_RT
Apba3		386.5	456.667	459	453.667	305.667	346.333	599.4	658.4	390	386.667	816.333	868.333	770.667	964	425.333	638.333	571	719.333	1773.33	1870.67	3499.33	3517.33	0	muscle_CE
Apbb1		10450	11244.3	4808.67	5570.33	43.5	63	11699.8	11591.4	97.6667	80.3333	94.6667	76	12.3333	19	161	164	141	78.6667	148	231.667	592.667	546.333	0	Spinalcord_RT
Apbb1ip		20.5	26.3333	42.3333	41.3333	3617.17	4046	222	214	1316	1049	223.667	129	26	34.3333	182	140.667	350	319	49	47.6667	115.667	189.667	0	Bonemarrow_CE
Apbb2		2071	2261.33	1634.67	1904.67	78.6667	115.667	2855.2	2739	404	355.667	1190.67	935.667	408.333	382.333	945	1033.67	963	691	684	485	1952	2209	0	Spinalcord_RT
Apc	marker_Ther	8402.5	10511.7	8999.33	10188	1444.83	1784.5	10644.2	9877.2	3454.33	2998.67	5787.33	4758.33	1471	1403.33	2467	2829	2481	2196.67	2273.33	1999	2572.67	3304.33	0	Spinalcord_RT
Apeh		480.5	469.333	550	677	3151.33	4199.83	1082.4	1084.8	1435.33	1623.33	1628	1505.67	1007.67	1199.33	465.333	624.333	575.333	530.667	814.333	746	1968.67	1916	0	Bonemarrow_CE
Apex1		200.5	216.667	129	152.667	609.333	774.5	669.8	621.8	166	177.667	169.667	145	106	127.333	127.667	200.333	106	119.333	107.667	112.667	1103.67	1089.33	0	muscle_RT
Apex2		149.5	203	894.667	1084	259.333	320.833	108	123	439.333	453.333	391.333	276	229.667	223.667	571	707	534.333	569.667	508.667	376.667	208.667	273.333	0	Hypothalamus_RT
Aph1a		65.5	69.6667	97	123.667	207.333	219.167	318.6	292	131.333	122	252.333	228.333	108.333	115	86	139	98	105.667	224	188.333	1272	1482	0	muscle_CE
Aph1b		586	755.667	663.333	732.667	328.5	331.667	893.8	803.8	192.333	161.667	233	248	55	66	267.667	380	210.667	260.667	295	489.333	183.667	269.667	0	Spinalcord_RT
Aph1c		117	131.667	151	178.333	152.333	143.833	256.6	212	110.333	103.333	32	18.3333	14.6667	17.3333	66	67.3333	57.6667	45.6667	25	20	69	72	0	Spinalcord_RT
Api5		1449.5	1684	1218.33	1359.67	3226.5	3876.17	1998.8	1810.6	2185	2191.33	2456.67	2208	1025.33	1155.33	868.333	1136	868	1065.67	1422.67	1479.33	1188.67	1669.33	0	Bonemarrow_CE
Apip		222.5	223	170	184.333	426.833	513.667	341.8	342.4	275.333	278.333	86	81	219.333	276.333	437.667	564	443	524	673.667	853	1059	1269	0	muscle_CE
Aplf		115	117.667	76	97.3333	524	747.5	193.8	178.2	297.333	325.333	226.333	201.667	76	78.6667	117	153.667	120	88.3333	84	63.6667	194.667	198.333	0	Bonemarrow_CE
Aplp1		12657.5	14452	6921	7887.67	6.33333	6	48701.2	47534.2	15.6667	17.6667	1182	1129	11.3333	9.33333	27.6667	21	20.6667	8.66667	13.6667	17	57.6667	67.3333	0	Spinalcord_RT
Aplp2		11866	14108.3	8066	10032.7	3780.83	5054.83	22542.4	21969	2838.67	3166	3501	2620.67	5501.33	6631.33	11535.3	12090.7	14489	8604	19241.3	14314	12686	13042.3	0	Spinalcord_RT
Apmap		1191.5	1350.67	1002	1182.33	1135.17	1196.83	2069.4	1975.2	510.333	485	715.667	641	672	751.667	2594.67	3941.33	3130.33	3637.33	7604.67	6916.67	1295.33	1887.33	0	BAT_RT
Apoa1bp		1231	1391	839.667	1011.33	432	477.167	1567.8	1458.8	475.333	465	681.333	565.667	824	1011.33	655.333	986.667	724.667	821.667	1718.67	1496.67	1564.67	1580.33	0	BAT_RT
Apobec1		43.5	43	53.6667	62.6667	1124.83	1246.83	116.2	95.8	1028	987.667	1101.33	988.667	436	505.333	406.333	448	575	599.333	175.333	238.667	155.667	240.667	0	Bonemarrow_CE
Apobec3		34.5	31	52.6667	56.3333	3682.33	4624.67	110.2	107.6	4999.67	4355.33	1074.67	697	39	42.3333	401	866.333	702	872.667	138.667	141.333	136.333	148.667	0	Spleen_CE
Apobr		16	19.3333	11	9	4270	3755.83	48.4	54.2	407.333	452.667	56.3333	41.6667	24.6667	24.6667	141	418.333	202.333	204	195.333	159.333	71.3333	141.333	0	Bonemarrow_RT
Apoc1		49.5	43	103.333	104.333	18.5	17.5	123.6	100.2	119.333	114.333	9.33333	37.3333	58356.7	78572.3	2482.67	2308	2232	2737.33	8199	9535.67	98	482.333	0	Liver_CE
Apoe		39930	40713	23590.3	29499.7	4149.33	5164.83	38856.4	38925.6	15235.3	16322	3984.33	3073.67	286402	360821	38245	33341.3	46091.7	20606	19194.7	7610.67	4433.67	7558.33	0	Liver_CE
Apold1		91	127.333	79.6667	108.333	215	267	110.6	113.6	107.333	177	56.6667	51	35	44.6667	176	154.667	191	164.667	464.333	255.333	91.3333	212.667	0	BAT_RT
Apoo		73	69	62.3333	66.3333	15.1667	18.5	71.4	67	15	18.3333	46.3333	43.3333	23	29	30.3333	40.6667	31.3333	88	245	268	390.333	518.667	0	muscle_CE
Apool		94.5	110.333	71.6667	87.3333	177.5	217	157.8	141.4	245	208	532.333	509.333	370	420	413.333	528.667	439	936.667	1456.67	1440.33	1363.67	1672.67	0	muscle_CE
Apopt1		348	364.333	295.333	353.333	283.833	326.667	550.4	508.4	310.333	307.333	342	287.333	235.667	306.667	552.667	698.667	565.667	619.667	1030.33	738	1307	1496.67	0	muscle_CE
App		19816.5	23704	17549.3	21596	4200.33	3952.17	52698.2	53061.8	2737	2631	9322.67	8803.67	768.333	1034	5255.67	5736.33	3977.33	2376.33	1852	1849.33	5261.33	6293	0	Spinalcord_CE
Appbp2		2181.5	2720.67	2431.67	2828.67	720.833	815.167	1816	1813.8	1334.33	1280	1972.67	1618	692	742	1256.33	1365.67	1088.33	971.333	1201.67	1246.67	390	514.333	0	Hypothalamus_RT
Appl1		1881	2056.33	2094.67	2461.33	1002	1014.33	3210	2942.8	1294.67	1140	1551.33	1213	583.667	491.333	1110.67	1153	1002.67	923.667	817	598.667	1547.67	1833.67	0	Spinalcord_RT
Appl2	marker_Ther	1363.5	1443.67	1904	2248.67	363.833	435.333	4594.4	4134.8	988	968.333	1938.67	1722	451.333	512.333	964.667	1419	1239	1174	826.333	729.667	1170	1278.67	0	Spinalcord_RT
Aprt		443.5	487.333	294.333	356.667	1190.33	1217.83	376.6	382.6	469	537.333	1745.33	1650.67	499.667	505.667	170.667	185	189.333	149	176	196	857.667	895	0	Ileum_RT
Aptx		455.5	549.333	432.333	559	275.833	297.167	1121.8	1038.6	328.667	303.333	349	279	177.667	219.667	280	398.667	315	325	349	371.667	1022.33	1100.33	0	Spinalcord_RT
Aqp1		150	187.667	20	12	21045.7	30631	54.4	58.6	4722.33	7340	2587.33	3028.67	1060	1856	2372	2458.33	2467.67	982.667	5440.67	1519.67	13291.7	12385	0	Bonemarrow_CE
Aqp11		215	258	200.333	246	29	40.5	220.4	192.2	112	97.6667	843.333	726.333	490.333	508.667	142	224.333	118.667	137.667	84.6667	98.3333	15.3333	47.6667	0	Ileum_RT
Aqr		1292.5	1554.67	1200.33	1416.67	1820.17	2263.67	1570	1549.8	2244	2147.33	1772.33	1454.33	688	746.333	739.333	1108.67	880	801.667	1136.67	952.333	1172	1327.33	0	Bonemarrow_CE
Ar		624	839.667	1354.67	1532	12	13	288.4	285.6	170.667	129.333	93.3333	69	137.333	174	3265	4349	2105.33	1302	341	243.333	650	968.333	0	VAT_CE
Araf		2862.5	3221	4031	4712	1159.5	1279	5279.8	5064.2	1772.67	1655	1910.33	1561	1050.33	1211.67	1257.33	2961	1320.67	1409.33	1590	1324.67	4126	4531.33	0	Spinalcord_RT
Arap1		510	581.333	609	694.667	4254.17	4477.83	1148	1227.2	3690.33	3486.33	1469.33	1148.33	1636.67	1692.33	798	1224.67	1488.33	1278.33	989.667	1282	1066.33	1458.67	0	Bonemarrow_CE
Arap2		3061.5	3482	1533.67	1751.67	413.333	536	2159.2	1890.6	3732.67	3099	4028.33	3860.67	592.667	686.333	746.333	1454.33	1176.67	1486.67	488.333	564.667	66.6667	143.667	0	Ileum_RT
Arap3		130	157.667	152.333	164.667	3553.17	3357.67	420.8	417.4	482	528.333	193.667	156	222.333	279	567.333	670.333	675.667	698	1122.33	1066.67	1020.33	1289	0	Bonemarrow_RT
Arcn1		1820	2150.33	1853.67	2216	2705	3131	3060.4	2816.8	2909.67	2689.33	6724.33	6118.33	2591.67	2988.67	2301.33	3234.33	2199	2152.67	2523.67	2289	5280.33	6007.67	0	Ileum_RT
Arf1		3522	4048.67	2048.67	2452	3526.17	3875.17	4769.4	4574.6	2059	2045.33	4902	4641	1683.67	1948.33	1514.33	2378.67	1521	1561	2152	2070.67	10866.3	11597.7	0	muscle_CE
Arf2		1087.5	1217.33	960.667	1128	776.667	907.833	1851.6	1773.4	630.333	656.667	359.333	312	210.667	237	456	622.333	457	409.667	350	344.667	992	1172.67	0	Spinalcord_RT
Arf3		9882	11394	5711	6328.67	2681.17	2860.83	12127.6	12031.2	1602	1553.67	2522.33	2237.67	768.333	746	1180.67	1712	1182	877.667	1071.67	927	917	1285	0	Spinalcord_RT
Arf4		1078.5	1286.67	737.333	909.667	1593.17	1843	2299	2148	998.667	924	2798.33	2404.33	1143	1183	1496	1594	1400.67	1265	1630.33	1213.67	1081.33	1620	0	Ileum_RT
Arf5		1880.5	1960.33	707.667	831.667	3848.17	5092.33	1819.4	1812	1389	1824	1784.67	1831	1088.67	1328	651.667	944	798.333	684.667	854.667	783.667	1564.33	1734.67	0	Bonemarrow_CE
Arf6		627	724.333	520.667	611.667	3532.17	4099.17	1215	1193.4	2850	2963.67	6156.67	6201	741.667	824.333	596	1174.67	794.667	875	967.333	998	710.333	1013	0	Ileum_CE
Arfgap1		1725	1916.33	1500	1829.67	977.333	1098	2052	1999.6	1091.67	1106.67	1483.67	1329.67	604.667	677.667	810	1661.33	953.667	854.333	839.667	639.667	1979.33	2051	0	Spinalcord_RT
Arfgap2		405	466.667	330.667	381.333	1198.5	1511.17	1626.4	1561	459.667	429.333	402	375	658.333	701	279	412	325	333.667	440.333	385.333	12460.3	12286.7	0	muscle_RT
Arfgap3		418.5	507.333	531.333	613.667	577.5	742.5	734.6	652.2	567.667	554.333	3220.67	2805	126.667	207	439.667	790.667	695.333	453.667	271.667	230.333	307.333	424.333	0	Ileum_RT
Arfgef1		2149	2669.33	2424.67	2794.67	4668.17	4829.17	4004	3784.6	3674	3243.67	8499.67	7167.67	2537.67	2295.33	1960.67	3003	1794	1912.33	2407	2157.67	8013	8940.67	0	muscle_CE
Arfgef2		2128.5	2600.67	2526.33	2847.33	2143.67	2483.67	3803.2	3671.4	2073.33	1994.67	2469.33	1975.33	1708.67	1766.33	1202.67	1731.33	1375	1403.67	3026	3239	2587.33	3395	0	Spinalcord_RT
Arfip1		516.5	610.333	477	565	679.333	716.5	801.2	757.2	773.667	700.667	1790.67	1616.67	426.667	497.333	663.667	977.333	620.667	688.333	729.333	804.333	502	641.333	0	Ileum_RT
Arfip2		1663	1840.67	1047.33	1291.33	412.833	517.333	2405.6	2276.6	552.333	516.333	1060.67	980	231.333	268.667	720.333	1148.67	718.333	766.333	985.333	923.667	455.667	666	0	Spinalcord_RT
Arfrp1		361.5	410.667	525	610.333	675.833	776	970	911.2	803.667	772.667	550	514.667	212	257	349.333	470.333	473.667	549	866.333	761.667	1212.67	1542.33	0	muscle_CE
Arglu1		882.5	1221	2486.67	3001.67	1537.67	1745.33	1891.6	1844.4	3461.67	3063.33	2306	1662.33	537.667	675.667	1857.33	3920.33	1566	2081.33	1417.67	1258	1518.67	1879.67	0	VAT_CE
Arhgap1		1042	1217.33	965.333	1116.33	1521.17	1596	1103.8	999.2	1246.33	1229	2351	2103.67	242.333	259.333	637.333	916.333	711.667	609	654.333	590.333	444	640.333	0	Ileum_RT
Arhgap10		2381	2206.33	144.667	189	382.833	475.333	205	211.8	359.667	383.333	240.667	177	80	86.6667	614.667	511.333	590	399.667	504.333	535	3799.67	3553	0	muscle_RT
Arhgap11a		49.5	57.6667	27.3333	29.6667	4081	4737.33	247.8	236.4	647.333	738.333	969	832	47.6667	35.6667	95.6667	200.333	113	89.6667	27.6667	34.3333	63	104.667	0	Bonemarrow_CE
Arhgap12		2683.5	2829.67	2083.67	2540.67	371	457.667	1989.2	1954	1399.67	1267.67	3721.33	3372.33	754	986.333	1070.33	1506.67	1241	1393.67	1571	1337.67	1305	1589	0	Ileum_RT
Arhgap15		201	244.667	37.3333	36	1465	1503.83	94.6	85.2	3531	2899.67	568.667	289.333	28	37.3333	271.667	222.667	604	813.667	58.6667	46.3333	85	99.3333	0	Spleen_CE
Arhgap17		117	151.333	340.333	348	2024.67	2394.67	629	584.2	1925.67	1586	1588.67	1246.33	221.333	198	531.667	730	753.333	648	326.333	272	1065.67	1400.67	0	Bonemarrow_CE
Arhgap18		219.5	222.333	632	689	1149.67	1411.17	519.4	467	975	933.333	2870	2450	381.667	392.333	1495.33	1764.67	1017.33	1074.67	932.667	814.667	304.333	445	0	Ileum_RT
Arhgap19		94	118.333	86	88.3333	4755.5	5555.17	365	486.2	1064	1419	573	495.333	84.6667	105	148.667	169.667	312	258.333	251	201	845	1046.33	0	Bonemarrow_CE
Arhgap21		2310	3001	2992.67	3413.67	1676.83	2158.5	5275	4907.2	777.667	848.333	2878.33	2335	824.333	675.333	1502	1531.67	1441.33	932.333	1412	1210.33	1131.67	1635	0	Spinalcord_RT
Arhgap22		177.5	148.667	136	177	15.8333	13.3333	289.8	278.4	152.667	135.667	78.6667	93	7	11	61.3333	80.3333	123	94.3333	29.6667	26	48.6667	92	0	Spinalcord_RT
Arhgap23		1362.5	1576	1791.33	2120	2755.5	3829.67	6869	6246.6	1303	1555.67	175.333	146.333	395.667	402.667	875.667	579.667	1187	621	653	514.667	480.333	630.667	0	Spinalcord_RT
Arhgap24		337	398	787.667	942.667	178.167	186.667	687.8	703.6	806.667	673.333	356.667	239.667	363	404	939.667	1009.33	1165.67	1129.67	1312.67	1209.67	744.667	850	0	BAT_RT
Arhgap25		151.5	176.333	25.6667	39.3333	1978.17	2119.17	75.6	82.6	2439.33	2240	329.667	179	47	58.6667	154	119.333	343	333	99.6667	73.6667	62.6667	103.333	0	Spleen_CE
Arhgap26		4536.5	5105.67	3284	3801.33	861	866	1895.8	1856.8	1829	1586	1645.33	1372.67	588.667	600	646.667	780.667	810.667	964.333	1628.67	1751.67	248.333	398.667	0	Brain_CE
Arhgap27		290.5	331	333	386	1560.67	1590.17	924.8	865.4	1494	1350.33	1918.67	1563.67	40.3333	54	283.333	369.333	286.667	342	329	252	288.333	297	0	Ileum_RT
Arhgap28		18	25.3333	24.3333	30.6667	29.6667	40.3333	39.2	26.6	181.333	168.667	109.667	85.3333	20.3333	19.6667	285.667	241.667	161.667	108.333	86.6667	100.333	99.3333	124.667	0	VAT_RT
Arhgap29		528	671.667	567	641.667	96.5	129	937.6	797.4	1805.67	1491	857.333	775.667	2079.33	2737.33	6621.67	5482.67	4920.33	4805.33	4338	4960	977.333	1745.33	0	VAT_RT
Arhgap30		75.5	89.3333	57.6667	81	7183.5	6966.5	152.6	155.8	8065.33	7245.67	1129.33	666	103.667	129.333	398.667	349.333	1074.67	1288	165.667	126.667	112.667	227	0	Spleen_CE
Arhgap31		548	698	648.667	760.333	873.667	894	1648.8	1495.4	818.333	729.333	941.333	689.333	241.667	289	819.333	1285	1320.33	928.333	1388.67	1182.67	1850.33	2252.67	0	muscle_CE
Arhgap32		7075	8839	3742.33	4250	189.333	207.833	4351.8	4105.4	367.333	336	3691.33	3017	471.667	441.333	1043.33	1108.67	842	702.667	1013.67	708.333	269.333	454.333	0	Brain_CE
Arhgap33		652.5	750.333	353	418.667	955.167	1197.5	1383.2	1182.4	73.3333	76	69.6667	51.3333	9	7.66667	51.3333	72	26.3333	24	11.3333	10.6667	27.6667	48	0	Spinalcord_RT
Arhgap39		1024	1228.67	1169.33	1298.33	483.167	612.833	1634.6	1469.4	556	550.333	569.667	465	100.667	91.6667	312	646	354.333	291.333	245.333	197.667	239	242.333	0	Spinalcord_RT
Arhgap4		28	33.3333	108	119	5020.67	4812.5	165	152.4	3665	3183	601.333	373.333	106.667	129.667	137	157	510.667	738.333	83.3333	72.3333	74.6667	96.3333	0	Bonemarrow_RT
Arhgap42		372	445	311.667	360	23.6667	28.1667	453.8	396	222.333	202.667	1797.33	1542.67	2105	1938	404.667	491.667	524	484	301	313	209.667	274.333	0	Liver_RT
Arhgap5		8246.5	8634.33	5423	6271.33	233	274.333	3513	3252.8	1590.33	1436.67	11245.3	10587.7	3184.67	3489	4798	6358.33	3650.67	8332	6571.33	11052	1221.33	2057	0	Ileum_RT
Arhgap6		202.5	241	694.333	826	292.167	404	603	532.6	515.667	463.667	257	159.667	132	180.667	193.667	189.667	275.333	194	125.333	86	174.667	229.667	0	Hypothalamus_RT
Arhgap9		20	17.3333	12	12.6667	3041.17	2862.17	95.6	95	1821.67	1789.67	315.667	186.333	38	38.6667	142.667	201	414	405.333	48	35.6667	64	97.3333	0	Bonemarrow_RT
Arhgdia		2721.5	2947.33	1938	2308.33	7809.33	8880	8313.4	7672.6	3451.33	3323	4163.33	3681.67	908.667	931.667	1994.33	1908.67	2122.33	1271.33	1333.33	1215.33	4910.67	5531.67	0	Bonemarrow_CE
Arhgdib		126.5	125.333	54.6667	78.3333	23806.5	22551	282.2	253.4	4999	4454	524.333	295.333	70	94.3333	293.333	287.333	500.667	534.667	124.667	124	533.667	715	0	Bonemarrow_RT
Arhgef1		316.5	347	555.333	686.667	9128.67	9437.17	2499.8	2463.2	4724.33	4241	1524.67	1045.67	519.667	508.333	974	827	1579	1452	855.667	724	1946	2312.33	0	Bonemarrow_CE
Arhgef10		1415.5	1564.67	1515	1782.67	89.6667	108.833	5514.4	5045.2	397.333	347.333	281.333	235.667	92.6667	108	757.333	904.333	1022.33	623	488.333	595	526.333	813	0	Spinalcord_RT
Arhgef10l		1672.5	1711.33	1220.33	1407	479	419.833	1902.4	2024.6	213.333	232.333	1130.33	927.667	825	924.667	273.667	708.333	450.667	227	180.667	138	4708	4824.33	0	muscle_CE
Arhgef11		1869.5	2297.67	2144.33	2535.33	891.5	955.833	4554.4	4439	1075.33	902.333	2867	2308.67	1027.33	968	1138.33	1267.67	1227.33	1009.33	1346	1115.67	2023.67	2440.67	0	Spinalcord_RT
Arhgef12		4649	5996.67	7476	8547	3805.83	5343.33	8093.8	7816.6	3689.33	3978.33	3355.33	2690	6073.67	5730.67	5035	6421	5141.33	4625	7939.67	9258.67	5125.67	7070	0	BAT_CE
Arhgef15		278	337.667	502.333	642.333	26.1667	35.3333	720.6	682.6	138	128.333	77	65	129.667	169.333	365.667	398.333	419.667	438.333	863	828	916.667	1317.33	0	muscle_CE
Arhgef17		3895	4596	4077.33	4703.33	157	201.833	5748.8	5955.6	1104	1013	438.667	330.667	134	139.333	604	924	646.667	385	565	477.333	4650	4643	0	Spinalcord_CE
Arhgef18		989	1281	1398.33	1540.67	2400	2602.67	1569.6	1602.6	4013.33	3470.33	1603.67	1323.33	875.333	805.333	793.333	1135	1114	1241.67	1000	1234.33	718.333	912.667	0	Spleen_CE
Arhgef2		1762	2105.33	1430	1716.33	3183.33	3248.83	2882.6	2633.8	3497.33	3411	2791.67	2123.33	116	117.333	977.667	1128	1376.33	1388	906.667	842.667	1135	1604.67	0	Spleen_CE
Arhgef25		1391	1675.67	1270.67	1402.67	115.333	170.667	1891.4	1897.8	247.333	265.667	264.667	201.333	33.3333	57.3333	297.333	319.667	320.333	231	276.333	310	702	859	0	Spinalcord_CE
Arhgef26		345	431.667	480.667	544.333	20	23.5	1556.8	1520	79.3333	59.3333	1030.33	1032	543.333	621.333	170.667	206	73.6667	77.3333	50.6667	38	28.3333	42.3333	0	Spinalcord_RT
Arhgef28		1032.5	1143.67	1046.33	1219.67	25.1667	22.3333	1775.2	1607.8	31.3333	21.6667	785.333	632	8.33333	7.33333	1143.67	1793.67	903.667	674.333	1644.33	1482.33	158.333	261.333	0	VAT_CE
Arhgef3		1655.5	2068.33	617.333	751.667	1527	1854.5	1830.2	1814.4	2795.33	2357.67	1656.33	1285.67	708	745	560.667	616.333	903.333	757	452.667	564.667	544.333	738	0	Spleen_CE
Arhgef37		71	101.667	37	54.6667	424.333	345.167	304.8	272.4	60.3333	77	104.667	122.667	196.667	184.333	86.3333	182	43.6667	103.333	33.3333	108.667	141.333	243	0	Bonemarrow_RT
Arhgef4		4797	5234.33	3827.67	4434.67	212	220.5	9986	9800.8	303.333	278.667	108	92.3333	30.3333	21.3333	125.333	338.667	101.667	112	65	49	15	23	0	Spinalcord_RT
Arhgef40		667.5	763.333	1570.33	1713	251.5	354.333	1772.8	1834.4	400	459.667	568	433.667	268.333	314.333	1048.33	2588.33	1549.33	1153	1865.33	999.333	737.667	1010.33	0	VAT_CE
Arhgef5		81.5	115	95.6667	106.333	62	73	157.2	138.4	286	268.667	5205.67	4665	825	905	486	1118.33	231	245.333	240	204	654.667	715.333	0	Ileum_RT
Arhgef6		376.5	422	424	466	2728	2585.67	1165.2	1108.8	3006	2531	576	338.333	82.3333	92.6667	594.667	659	1020	973.667	824	470.667	3587.67	4347.33	0	muscle_CE
Arhgef7		2441	2962.33	2429	2760	1231.67	1363.5	2745.2	2700.6	1400.67	1313.33	1734.33	1380.67	842	739.667	886.667	1145.33	985	1029	1057	935.667	3095.33	3336.33	0	muscle_CE
Arhgef9		5753.5	7356.33	4264	4873.67	13.3333	24.1667	6564.8	6262.6	67	55.3333	87.3333	62	70	61.6667	206.667	227.667	255	256	495.333	385	761.667	910.333	0	Brain_CE
Arid1a		1148	1514.33	1443.67	1620.33	6227.33	6720.17	3347	3268.2	3364.67	3050.33	2692.33	1944.67	960.333	718.333	1172.67	1271.33	1570	1202.33	890.333	633.667	2474.33	2924.67	0	Bonemarrow_CE
Arid1b		1731	2088.67	1761.67	2025.33	1937.17	2468	1787.6	1761.4	2791	2442.67	2121.33	1528.67	1075.67	933	1551.33	1953.33	1805.33	1461	1873.33	1537	2962.67	3508.33	0	muscle_CE
Arid2		813.5	1098.67	1443.33	1542.67	3100.83	3869.67	1303.6	1179	2454	2357.67	2559	1952.33	881	777	1217.67	1762.67	1210	1227.67	1167.33	977.333	826.333	1237	0	Bonemarrow_CE
Arid3a		129.5	159	241.667	236.667	3245	3050.67	193.4	183.6	757.667	757.333	527.333	335.667	54.6667	53.3333	188.667	216.333	217	199.667	205.333	134.333	138	193.333	0	Bonemarrow_RT
Arid3b		68.5	105.333	108.667	122.333	711	727.833	158.2	156	822.333	671	370.333	280.333	72.6667	60.3333	116.667	104	177.333	196	102	59	189.333	290.333	0	Spleen_CE
Arid4a		1060	1354.67	1213.67	1525.67	2263.67	2435.67	966.4	974.2	2504	2310.67	1580.67	1367.67	532	657.667	633	809.333	791	700.667	674	476.333	547.333	736.333	0	Spleen_CE
Arid4b		1343.5	1539	2125.67	2581.67	1326.33	1633.83	1837.8	1763.2	3057.67	2680.67	2475.33	2066.67	800.667	930	1259	1978	1116.33	1415	1135.33	839.667	602.667	946	0	Spleen_CE
Arid5a		240.5	310.333	300.333	328.667	1186.83	1271.17	437	399.8	1687.33	1647.33	488.333	346.667	51.3333	43.6667	226.667	343	485.333	527.667	169	152.667	196.333	293.667	0	Spleen_CE
Arid5b		737	998	872	1031.67	301.667	341.5	802.8	812.2	1407	1169.67	1346	864.667	1396.33	1763	944.333	1242.33	947	671.667	611	628.667	447.333	741.333	0	Liver_CE
Arih1		1997	2399	1953.33	2207.67	2854.33	3268.83	3306.2	3098.2	2673	2468.67	3037.33	2661	1327.33	1190.33	1799.33	2220.33	1655.33	1884.67	2246.33	2233.67	5625	6599.33	0	muscle_CE
Arih2		759.5	847.667	865	1029.33	1249.33	1447.33	1190.4	1140.6	1198.33	1261.67	1327	1149	666.667	779.667	758	1088.33	803	905.333	1106.33	1095.33	4154.33	4714.67	0	muscle_CE
Arl1		1209.5	1403	855.667	1047.67	301.833	359	1138	1099.8	553.667	521.333	2180	2093.67	837	1029.33	884	1199	835	906	1066	1040.67	2653	2984.33	0	muscle_CE
Arl10		233.5	290	674.667	802.667	108.667	114.667	483.6	524.6	209.333	189.667	140.333	116.667	57	60	118.333	173.667	149	143.667	128.667	102	69	101	0	Hypothalamus_RT
Arl13b		308	363	350.333	401.667	191.167	215.5	453.4	426.2	392.667	357.333	441.667	456	181.667	202	321.667	436.667	289	293.667	232	219	150.333	220.667	0	Ileum_CE
Arl14ep		820.5	987.667	764.333	905	402.833	465.667	914.2	893.6	591.333	533.333	407.333	295.667	289.333	321.667	421	590.333	400	457.667	428.333	391.333	292.333	414	0	Brain_CE
Arl15		531	678.333	244	313	222.833	277.167	410	374.8	235	195	242.333	192	208	222.333	241	421.333	310	343.333	298.333	375	209.333	262	0	Brain_CE
Arl16		352	356.333	342.667	443	164.333	195.167	865.2	854.6	160	135.333	147.667	140	81.6667	104.667	135.667	181	142.667	137.667	150.667	119.667	126	169.667	0	Spinalcord_RT
Arl2		852.5	910	829	1037	218.333	278.667	2106.2	1994.6	238.667	254	260.667	232.333	82	78.6667	330.333	538.667	411.333	428.667	715.333	755.667	2004.33	1781	0	Spinalcord_RT
Arl2bp		1937.5	2175	1905	2407	1774.17	2012.33	4416.8	4305	860.333	942	1083.67	929	100.667	127.333	656.333	722.333	753	774	821.333	815	2367	2633.67	0	Spinalcord_RT
Arl3		1034	1131.67	679	855.333	193.333	218.5	2008.4	2077.4	139.667	131	78.6667	75.3333	120	141	229.333	286	237.333	190	331.667	256.333	2227	2136	0	muscle_RT
Arl4a		744.5	849.667	592	735	1264.5	1768.5	592.8	515	646.333	682.667	1522.67	1366	673	678.333	4059.67	3415	2928.33	3849.67	4369	2369.67	971.333	1419.33	0	BAT_RT
Arl4c		1395.5	1671.33	1820.33	2150.33	593.333	603.833	2635	2845.6	1955	1981.33	235	176	45.6667	58	353.667	2154.67	374.333	404.333	72.6667	47.6667	45	87.3333	0	Spinalcord_CE
Arl4d		317.5	451	74.3333	71.3333	37	44	269	302	120.667	106.333	233	261.333	583	648	172	166.667	120	69.6667	86.6667	65.6667	212.667	311.667	0	Liver_CE
Arl5a		1257	1516.33	1326.67	1553.33	976.667	1131.83	2246	2163.6	1532	1360	1653	1393	2053.33	2174.33	1373.33	1311.33	1343	1528	1494.67	2115.67	1736.67	2252	0	muscle_CE
Arl5b		496	742.667	657	727.333	209.833	258.333	400.4	383.6	724	660.333	1389	1278.67	909.333	1061.33	755	865	595.333	672.667	819.333	679.333	356	464	0	Ileum_RT
Arl5c		37.5	45.6667	32.3333	33.3333	1049	1381.33	48.6	42.2	760	671	89.3333	49	24	27.6667	49.6667	43.3333	100.667	154.667	28	25.6667	16.3333	30	0	Bonemarrow_CE
Arl6		548.5	574.667	422.667	481.333	35	47.8333	538.2	498.6	75.6667	59.3333	56.6667	40.3333	35	49	200	342	156	174.667	169	152.667	106.333	129.667	0	Brain_CE
Arl6ip1		4857	5755.33	4423.67	4932.33	7535.33	8979.67	8602.4	8255.6	3754.67	4035.33	5844.33	5256.67	3215	3133	1750.67	2356.33	2007.67	1904	2725.33	2173	438	744.333	0	Bonemarrow_CE
Arl6ip4		662.5	676	451.667	537	780.833	911.5	1102.6	1229	499.667	525	436.333	447	317	408.333	274.333	438.667	350	350.667	384.667	493	1339.33	1451.67	0	muscle_CE
Arl6ip5		2065.5	2338.33	1046.67	1259	1453	1581.83	2866.8	2736.2	1144	1082.67	816.333	635.667	362.333	432.333	559.667	665	671	489.333	658.333	498	5372	5970	0	muscle_CE
Arl6ip6		136	176.333	172	162	897.667	1007.67	166	167.4	374.667	448.333	288.667	277	134.333	131.333	197.333	297.333	185.333	226.667	264.667	206.667	230.667	342.333	0	Bonemarrow_CE
Arl8a		1149.5	1335.33	821.333	988.333	1012.33	1064	4633.6	4348	428.333	428.333	490	403	100.667	109	329.333	312.333	314	253.333	252	181.333	780.333	864.333	0	Spinalcord_RT
Arl8b		3860	4589.67	2818.67	3335.67	1644.5	1907.33	5968	5467.8	1569	1431.67	2114.67	1673.33	1336	1296	1400.33	1891	1433.67	1568.33	2552.33	2246	5147.67	5443.33	0	Spinalcord_RT
Armc1		1402.5	1691	966	1120.67	1137	1455.67	2104.4	2051.2	752.667	794.333	773	707.667	623.667	691.667	473	682	470	760.667	1124.67	1426	1125.67	1534.33	0	Spinalcord_RT
Armc10		253.5	313	233.333	280	390	457.667	334.2	323.8	595.667	556	548.667	428	102.333	123	265.333	441	270.333	226.667	243.333	213.667	193.333	299.667	0	Spleen_CE
Armc5		276.5	299	180	196.667	567.333	661.667	555.6	534	353.667	347.667	378.333	328.667	167.333	163.333	190.667	243.667	210.667	149.667	208.333	195	771	814.333	0	muscle_CE
Armc6		647	729.667	479.667	534	219	248.333	715.6	696.6	172	209	146.333	152	121.667	125.667	100	140.333	107.333	128	170.667	208.333	516	570	0	Brain_CE
Armc7		120	158.667	138	173.333	645.333	626.5	235	223.4	386.667	382.667	220.667	175.333	46	62.6667	75.6667	112.333	122.667	117	79	48.6667	71	90.6667	0	Bonemarrow_RT
Armc8		1658	1871	1535.33	1830.67	1284.67	1456	1831.8	1653.2	1287.33	1191.33	1661.67	1550.67	399.333	496.667	765	943.667	780.333	789.333	867	788.333	2414	2717.33	0	muscle_CE
Armc9		642.5	764	1145	1395	252.333	368.167	780.4	797.8	512	484	204.333	139.667	154	145.667	233.667	310.667	212.667	203	147.333	102.667	94.6667	126.667	0	Hypothalamus_RT
Armcx1		1442.5	1723.33	1318.33	1532	80.1667	102.667	2574	2499.2	135	122	106.333	82.6667	35.6667	40	205.333	664.333	217.667	174.667	178.333	130	75	107.333	0	Spinalcord_RT
Armcx2		2351.5	2737	1961.67	2319.33	196.5	252.833	3854.8	3449.6	516.333	480.333	147.333	92	45	59.6667	180	957.667	207	130.667	139	114	203	294.333	0	Spinalcord_RT
Armcx3		203.5	275	171	191.667	41.8333	44.1667	306.6	274.4	71.6667	69	65	52.3333	17.3333	25.6667	63.6667	162	56.6667	67.6667	50.3333	35.3333	666	752.333	0	muscle_CE
Armcx4		1500	1839	2442	2552.33	114.833	147.667	2867.8	2854.8	133	121.333	95.3333	55.3333	66	50.6667	141	328.333	203.333	130.667	106.667	90.3333	1703.67	2318	0	Spinalcord_RT
Armcx5		454.5	558	500.667	656	124.167	141.667	506	442.6	277	242.333	192.667	137.333	62.6667	80.3333	208	289.667	204.333	188	187.333	126.667	171	221	0	Hypothalamus_RT
Arnt		340.5	437	796.667	886.333	1492.67	1816.83	1472.2	1399.8	1183.67	1083.67	1436	1047.33	902.667	843.333	1104.67	1124	1257.33	1003.33	1136	854.667	2915.67	3443	0	muscle_CE
Arntl	marker_Ther	860.5	1059.67	756.333	733.667	469.833	655.833	541.6	604	756	580.333	1763	1854	892.333	716.333	350.667	753.333	321.667	701	297	689.667	1389.33	2302.67	0	muscle_CE
Arpc1a		2376	2702.67	1451	1648.33	1805.33	2102	4213.4	4135.4	782.333	854	1831.67	1781.33	574.667	690.333	1193.33	1505.33	1342.67	1073.67	1322.67	1301.67	1246.33	1561.33	0	Spinalcord_RT
Arpc1b		232.5	266	211.667	257.333	7676.67	7174	592.2	547.4	4847.67	4750	5974.33	5896.33	407	554	2125.33	2721.67	3030.67	2713	1299	1002	1091.33	1741	0	Bonemarrow_RT
Arpc2		1768.5	1991	1073.33	1280.33	10026.3	10215.8	3046.4	2967	4276.67	3958.33	5833.67	5552.67	1272.67	1549.67	1453.67	2167.33	1446	1344.67	1384	1265	2862.67	3224.67	0	Bonemarrow_CE
Arpc3		2238.5	2569.67	940	1118.67	6242.33	6690.33	2072.2	1946.8	3117.67	3027	3349.67	3163.33	825	1009	1032	1774.33	1259.67	1166.67	1428	1370	1605	1957.67	0	Bonemarrow_CE
Arpc4		1813	2153.67	908.667	1052.33	3701.5	3781.17	1842.2	1802.8	2100	2000.33	2283.67	2239.33	526	672.667	794.667	1007	954.333	843.333	939.667	926.667	1218.67	1328.33	0	Bonemarrow_CE
Arpc5		1153.5	1429.33	808	959.667	6913.33	6994.67	1205.8	1203.6	3812	3813.33	5105.67	4972.67	862.333	1024	1286.33	1778	1455.33	1487.67	1162	1030.33	657.333	974.667	0	Bonemarrow_CE
Arpc5l		1256.5	1489.67	1182	1328.33	1162.83	1487.83	1782	1918.4	2466.33	2056.67	953.333	839.333	592.667	698.333	639.667	1382.33	764.667	1227.67	1296.33	1674.33	4568.33	5263.33	0	muscle_CE
Arpp19		4006.5	5083	1224.67	1349	1029	1202.33	2181.2	2033.6	962.333	903	1350	1127.33	878	850	820.333	1080.67	738	937	945	1270	2342.67	2579.33	0	Brain_CE
Arrb1		6475.5	7521.67	7345	8131.33	12463.7	16492.5	11712.6	11120.4	5672	6680	5566.67	5648.33	413	521.667	2153	1865.33	2699.33	1818.67	2187.67	1397	1678	2375	0	Bonemarrow_CE
Arrb2		563.5	582.667	837.333	1059.67	6378.33	5794.67	1441	1369.2	1565	1539	396.333	279.333	216.667	299	439.333	603	616	548.667	185	161.333	405	486.667	0	Bonemarrow_RT
Arrdc1		95.5	109	244.667	280	1201.33	1289.83	253.4	225.8	935	876	1083	952.667	37	44.6667	222.333	518.333	286.333	301.333	113.333	88	180.333	207.333	0	Bonemarrow_CE
Arrdc2		182.5	178.667	159.667	219.333	511	700	616	579.6	430	490.333	277.667	275.333	124.333	161.667	231.667	957.333	217.667	202.667	148	156.333	1155.67	809	0	muscle_RT
Arrdc3	marker_Ther	1272.5	1552.67	1310	1638	1578.83	2250.17	3418.6	2956	1752	1412.67	1263.33	1068.33	2671.67	5078.67	1728.67	2246.33	1255.67	1433.67	1271.67	1022.33	1120.33	1807.67	0	Liver_CE
Arrdc4		154.5	177.667	167.667	180.333	751.333	848.833	261.4	261.8	467.333	462.333	1016.33	1414.33	199.333	221	456.667	638.667	545.667	462.333	250.667	378.667	414.667	781.333	0	Ileum_CE
Arsa		652.5	647	679	812.667	465	493.333	1283.4	1237.6	504.333	519.667	370.333	307	551.667	850	384	424.333	620	428.667	990.667	1019.67	416.333	594.333	0	Spinalcord_RT
Arsb		949	1047	463	545.667	2532.83	2530.5	2774.6	2568.8	307.667	286.333	258	186	449.667	318.667	393	365.667	538	296.333	319	209.333	367.667	591.333	0	Spinalcord_RT
Arsg		841.5	903	573	733.333	450.5	477.667	3699.4	3217	191.667	237	164	106.667	510	584.667	134	167	149.667	105	120	63.3333	49	73	0	Spinalcord_RT
Arsk		150	178.333	181	242.667	171.333	201.833	316.8	285	354.333	314.333	207	149.667	149.667	178.333	250.667	422	266	233.333	214	198.333	221	321.333	0	VAT_CE
Art3		56.5	64.6667	44	49.6667	8.66667	9.5	480.8	506.6	69.3333	51	118	119	41.6667	42	3148	2717	3001.33	1906	2263.67	819	7230.33	8547.33	0	muscle_CE
Arv1		64	67	125	143	65.1667	89.1667	124.2	129.6	146.333	132.667	98.3333	82.6667	42.6667	34	75.6667	102	75.6667	95.6667	70.6667	71.6667	100.667	95	0	Spleen_CE
Arvcf		622.5	687.667	1138	1246.67	294.5	395	1122.8	1172.8	1137.33	998.667	280.667	247	337	393.333	317	889	282	209	143.667	159.667	846.333	893.667	0	Hypothalamus_RT
As3mt		377	354.333	602.667	675.333	258.5	312.167	618	567	402.333	374.333	878.333	755.333	743.667	834	106.333	215.333	146	152	226.333	410.667	1965.67	2225	0	muscle_CE
Asah1		1148.5	1327.67	1344.67	1477.33	1957.83	1998.5	2192.4	2050.2	2244.67	2126	3080.33	2741.33	617.667	734.333	1535.33	2264.33	1531	1477.67	1117.33	879.667	791	1217.33	0	Ileum_RT
Asah2	lipid_GO	585	653.667	626.333	794.333	159	183.333	2685.6	2631.4	302.667	324	2052.67	1875	425	429.667	611.333	724	748.667	589.333	653.667	542.333	378.333	511.667	0	Spinalcord_RT
Asap1		1402.5	1810.67	966.667	1114	5399	6685	3927	3772.6	1670.67	1743.33	889	569.667	373.667	366.333	717.333	574	1078.67	688.333	547	419	773	930.667	0	Bonemarrow_CE
Asap2		724	880.333	773.333	894	397.833	522.5	2068.2	1870	351	328.667	1524.67	1380	646.333	434.667	428.667	620	492.333	444.667	348	290.667	366.333	563	0	Spinalcord_RT
Asap3		126.5	141.667	289	363	11.5	12	979	914.2	75.3333	76	183.333	148	244.667	271.667	201	219.667	382.333	322	130	146.333	273	465	0	Spinalcord_RT
Asb1		1133	1337.33	1262.33	1370.67	4537.33	6054.5	1691.8	1650.2	1571.67	1983.67	268.333	184.667	196	179.667	448.667	501	479.333	413	477.667	394.333	1003.33	1121.67	0	Bonemarrow_CE
Asb13		795.5	909.667	554	688.667	172.167	212.167	2624.8	2728.4	548.667	450	401.333	366	792.333	799	263	348	365.333	417.333	440	372.333	953.667	1162.33	0	Spinalcord_CE
Asb2		73.5	113.333	71.6667	84.3333	110.333	156.167	83.2	66.8	2512	2493.67	797.667	592.667	79.6667	61.6667	57	92	168	89	456.333	219.333	41393.3	44653.7	0	muscle_CE
Asb3		1087.5	1063	488.667	570.333	327.167	386.5	393.2	380.2	491	425.667	322.667	281	154.667	204.333	268.667	393	276	322.667	263.333	218.667	317.667	350.333	0	Brain_RT
Asb6		544	629	410.667	472	926.333	1169.83	903.6	869.8	600.667	681.333	389	362	177	177	257	379	278.333	292.667	231.667	223.667	447	561	0	Bonemarrow_CE
Asb7		354	441.333	544.667	596.667	815.333	843.5	533.6	491.8	369.667	377	694	500.667	300.333	301.667	376.667	544	352.333	311	430	431	479.333	569.333	0	Bonemarrow_CE
Asb8		766	877	606.667	696.333	539.667	629.833	1695.2	1601.4	363.667	362.667	572	457	390.333	361.667	253.333	325.667	313.667	297.333	735.333	628.667	5238.67	5081.67	0	muscle_RT
Ascc1		353	395.333	345	406.333	384.167	425.5	488.2	488.6	327.667	302.333	315	278	168.667	227.333	240.333	362	224.333	192.667	346.667	322.667	786.333	717.333	0	muscle_RT
Ascc2		373	385.667	607.667	695.667	679.833	822.5	671.4	721.8	729.667	667.333	1436.33	1171.67	655.333	580.333	549	618.333	603.667	460.333	418.333	405	963.667	1062.67	0	Ileum_RT
Ascc3		1433	1596.67	1548.33	1786.67	1195	1468.67	724.6	672.2	3225	3011.67	3924.67	3428	1628.33	1822.33	1234	2076	1340.67	1495.67	1196.67	1182.67	1032.67	1169.33	0	Ileum_RT
Asf1a		180	209.667	182.667	197.333	718.833	930.5	386.4	344	546.333	576.667	384	336.333	139	160.333	266.667	463	233.667	338	274.667	277	503.333	576	0	Bonemarrow_CE
Asf1b		15	16	11	16.6667	2766.17	3572.17	34.6	31.2	496.667	671.667	274.333	276.333	19	12.3333	25.6667	28.6667	26.3333	44.6667	77.3333	51.6667	12	24.6667	0	Bonemarrow_CE
Ash1l		4217	5190	5394.33	6199.67	1926.83	2242.67	3906.8	3765.8	5756.67	4951	5320.67	4167	1978	1778	3014	3750.67	3193.67	3081.67	3318.33	2576	3381	4608.33	0	Hypothalamus_RT
Ash2l		744.5	857.333	1309	1571	960.167	1278.5	1338.8	1287.6	1147.33	1176.67	1614.33	1274.67	431.667	501.667	626.667	884	658	609.667	674.333	623.667	1175.33	1358.67	0	Ileum_RT
Asl		344	388.333	406	477.667	352.833	370.667	671.8	648.6	316.667	303	490	438.667	10368.7	10137	398.667	834.667	344.333	248.333	269	291	368	363.667	0	Liver_RT
Asna1		1919.5	1993.33	915.333	1142.33	955	1138.33	2529.4	2405.2	688.333	709	751.333	774.667	467.333	572.333	562	822	590.333	785	1342.33	1683.33	2384	2483.67	0	Spinalcord_RT
Asns		3102.5	3442	1555.67	1795.67	1614	2045.67	2843.2	2703.6	518	873	901	839.667	123	68.6667	1035.67	1844.33	1066.33	1296	1722	1469.33	63.3333	245	0	Brain_CE
Asnsd1		434	468.333	372	420	2053.33	2270.17	671.6	622.8	1432.33	1463.33	957.333	851.667	620.333	790.333	689.667	1128.33	788	1033.67	1294	1414.67	6085.67	6645	0	muscle_CE
Aspa		602.5	632.667	517.667	631.333	11.1667	11.3333	2071.8	1939	57.6667	63.6667	6596.67	4829	284.333	294	731.667	979.333	761.667	2380	2023	2446	249.667	423.333	0	Ileum_RT
Asph		4389.5	4741	1990	2250.67	902.667	1148	2803	2645.4	1085.33	1139.33	2400.67	2007.33	1220.33	1488	5325.33	5864.33	4347.33	2807.33	1930.67	1829.33	12339.7	13263.3	0	muscle_CE
Aspm		21.5	24.3333	28.6667	33.6667	3740.5	4807.33	32.4	24.6	1676.67	2202.33	1410	1373.67	45	37	54.6667	69	63.3333	86	34.3333	33.6667	6	13.6667	0	Bonemarrow_CE
Aspscr1		657	692.333	555.667	679.667	985.5	1155.5	1273.6	1257.8	640.667	653.333	945.333	859	1176.33	1242.67	560	759.667	588	555	416.667	477	1250.67	1275.33	0	muscle_CE
Asrgl1		4199	4255	3574.33	4592.67	510.833	644.833	5181.6	5151	804.333	860.667	150.667	95.3333	216.667	239	459.333	533.667	441.667	306	496.333	496.333	2953.33	3215.33	0	Spinalcord_RT
Aste1		99	127.667	179	223	115.167	149.667	141.6	134.6	311.667	284	315.333	315.333	98.3333	103.667	159.333	254.667	152	256.333	388.333	363	44.3333	76	0	BAT_RT
Asxl1		734	979.333	1212.33	1384	3194.17	3584	1705.4	1662.2	1841	1955	1579	1214.67	637.667	646.667	760.333	897.667	929.333	627	646	418.667	1095	1161	0	Bonemarrow_CE
Asxl2		811.5	973.333	1557.67	1857.33	1786.67	2058	1354.4	1174.6	3067.67	2842.67	3006	2399.33	1154.33	1104	1113	1738.67	1228.67	1433.33	1384	1062	1040.67	1299.33	0	Spleen_CE
Atad1		2446	2526.33	1860.33	2234	1222.67	1442.67	3238.6	2989.8	1343.67	1187.33	2436	2363.67	1034	1241.33	1142.33	1612.33	1005.67	1132.33	1766.33	1318	3116	3828.67	0	muscle_CE
Atad2		219.5	281.667	169.667	191.333	4315.67	5491.83	275.4	322	2340.67	2628.67	1538.33	1385.67	153.333	138	224.667	367.667	279.333	317	155.667	179.333	69.3333	117.667	0	Bonemarrow_CE
Atad2b		1282	1372.67	1279.33	1405.67	2359.83	2873.5	939.2	905.6	2679.67	2435.67	2535.67	2231	871.333	840.667	994	1442.33	1033.67	1211.33	1130.67	858.333	701.667	986.333	0	Bonemarrow_CE
Atad3a		407.5	461.333	751.333	854.667	541.167	687.667	882.6	871.6	666.667	767.333	988	810.667	1011	1145.67	596	871	744.667	1205.33	2820.33	2093	1560	1970.67	0	BAT_RT
Atad5		154.5	154.667	270.333	323.333	2299	2984.5	222.2	179.6	908	1279.67	642	501.333	105	105	165	194.333	154	143.333	94.6667	79.6667	68.3333	84	0	Bonemarrow_CE
Atat1		310.5	348.667	391.667	438	167.333	168	1721.2	1511.6	204.667	190.333	419.333	322.667	301	245.667	215.333	355.667	228.333	347.667	473.333	475	169	194.333	0	Spinalcord_RT
Ate1		2700.5	3088.67	3263	3874.67	1241.33	1365.67	2785.4	2505.4	1535.67	1509.67	1457.33	1258.33	792	898	1068	1515.67	1179.33	1117.67	1356	1289	2349	2702.33	0	Hypothalamus_RT
Atf1		75.5	97	92.6667	126.333	1159.67	1364.33	150.6	167.4	354	364	335.667	263.333	221	206	198	233.667	203	222.333	249.333	222	1566	2060.67	0	muscle_CE
Atf2		1973.5	2474	2188.33	2623.33	1327.67	1583.33	2407.8	2293	1140.33	1074.33	1468	1219	629.667	629.667	1052	1270.67	984.667	1192.33	2517.33	1790.67	774.667	1098	0	Hypothalamus_RT
Atf3		13.5	27	15.6667	16	74.3333	74.1667	38.6	41.6	65.3333	87.6667	847	1152.33	19.6667	30.3333	120.333	108	103.667	63	143.333	95	186.333	444	0	Ileum_CE
Atf4	marker_Ther	2845	3407	1577.67	1764.33	4832.33	6583.33	3290.8	3361	2784.33	2907.33	3544.67	3917	1740.33	2416	1233	2441.67	1319.33	1629.67	2531	2050.67	8921.67	10911.3	0	muscle_CE
Atf5		255	269.333	131.667	149	227	321	815.6	774.8	164.333	143.667	124.667	124.333	1992	1892.67	675.667	567.667	868.667	1053.33	1064.33	2798.33	3073	4178.67	0	muscle_CE
Atf6		2187	2679.33	1014.33	1177.67	1722	1926.67	1831.6	1692.8	2323.67	2136	3126.67	2544.33	2095	2318.33	1136.67	1876.33	1252	1068.67	1820.33	1642.67	2056.33	2521.33	0	Ileum_RT
Atf6b		736.5	821.333	411.667	493	1526.5	1634.83	1392	1362	817	756	662.333	583	345.667	379	357.667	579.667	378.667	331.333	329.667	265.667	526	681.667	0	Bonemarrow_CE
Atf7		253	392.667	485	502.333	245.833	270.167	306.8	312	1021	856.333	964	613.333	507.667	325.667	1070.67	925.667	965.667	847.667	684.667	671	628.333	731.667	0	VAT_RT
Atf7ip		1443.5	1795.67	1880	2058	3265.5	3850.17	1464	1493.8	4602	4049.67	2855.33	2203.67	1037.67	938	1431	1590.67	1767	1763	1038.33	993.667	1324.33	1711	0	Spleen_CE
Atg10		154.5	172	150.333	198.333	78.8333	77.8333	296.8	278.8	108.333	113	87.6667	62.6667	55.6667	82	214	279.667	260.333	402	526.333	553.667	396	491.667	0	BAT_CE
Atg12		1118	1286.67	747.333	844.667	1033.17	1275.5	1658.4	1593.4	688.667	703.667	882.333	933.667	560.333	625.667	756.333	983.333	751	852.333	1071.67	1319.33	1216.33	1525.33	0	Spinalcord_RT
Atg13		866	1011	599.667	734.333	926	1107	2969.8	2794.8	406	379.333	734.333	605.333	634.333	622	361.667	418.333	372	309.333	445.667	396	2289	2353.67	0	Spinalcord_RT
Atg14		340.5	403	300.333	360.667	377.333	469.333	586.2	577	247.667	252	311.667	278	301	375	206.333	246.333	243.667	205	266	294.333	493.667	526	0	Spinalcord_RT
Atg16l1		1182	1483.67	1405.67	1593.33	850.833	993.5	1434.8	1471.2	1692.33	1564.33	1240.67	1142	886.333	998.667	885	1494.33	1049.67	1281.67	1453	1122	1353.33	1604	0	Spleen_CE
Atg16l2		240.5	299	826.667	867.333	594	591	424.4	458.4	1744	1425.67	470.333	465.667	356	412	224.667	287.667	365.667	505.333	304.667	205.667	243	379.667	0	Spleen_CE
Atg2a		860.5	961	1171.67	1387	1958.33	2247.17	1996.8	2010.2	1255.67	1374	1596.33	1650.33	1250	1230.67	728.667	831.333	1029	896.333	1207.33	1138.33	2363	2429.67	0	muscle_CE
Atg2b		1932	2482.33	3036.33	3552.67	1482.83	1766.67	2933.2	2934.4	1945.33	2030.33	2238.33	1685.67	1458.33	1629	1077	1734.67	1271.33	1258.67	1881	1481.33	1918	2371	0	Hypothalamus_RT
Atg3		675	767	669.333	791	1341	1349.17	1448	1402.4	961	853	920.667	835.333	997	1268.33	763	972	784.333	991.333	1142.67	979.667	1009.67	1219.67	0	Spinalcord_RT
Atg4a		38	48.6667	73.6667	81.3333	459	642	57	55.2	357	434.667	199.667	206	102	119.333	212	1140.67	145.333	176.333	175	209	631.333	737.667	0	VAT_CE
Atg4b		1388	1602.33	1206	1386.67	1690.83	2223.67	2294.2	2210.6	1100.67	1256.33	1084	1066.33	576.333	673.333	533	803.667	646.333	647	898.333	861.333	1286.33	1583	0	Spinalcord_RT
Atg4c		1165	1214.33	597.333	720.333	295.167	328.333	1339.2	1295.4	275.667	247.333	473	408.333	273	240.667	248.333	423.667	228	227.333	266.667	271	366.333	555.667	0	Spinalcord_RT
Atg4d		656.5	722	459.333	541.667	1801	2323.83	976.6	1038	948	1024	1389	1479.33	457	547.667	307	435.333	413.333	537.667	1104.33	1128.67	3492.33	3155.33	0	muscle_RT
Atg5		548.5	639	414.333	460.667	671.667	768.5	844.6	871.2	658	597.333	1024.67	1008	950	1094	412	683	436.333	610	526	605.333	621	769.667	0	Liver_CE
Atg7		639.5	722	435.333	496	1214.83	1223.17	856.8	803.2	660	660	660.333	517	1009	1163	894	991.667	1011.67	920	1081.33	933.333	556	609.667	0	Bonemarrow_CE
Atg9a		2234.5	2645.67	1763.33	1984.67	2538.33	2951.17	3929.4	3883.6	702.333	794	2519.67	2190	1420.33	1282.33	531	724	663.333	578.333	1007	815.667	12651	12157	0	muscle_RT
Atic		777	897.667	925	1063.33	1718.67	2080.33	1094.6	1089.2	1574	1631.33	1582	1345.67	570.333	676.667	560	842.667	653.333	554	674.333	579.333	1770	1685	0	Bonemarrow_CE
Atl1		2252	2679	1929.33	2408	69	103.667	2627.4	2486.2	164	148.333	110.333	78.3333	56.3333	66.3333	113.333	167.333	123.333	123	105.667	96.3333	68.3333	82	0	Brain_CE
Atl2		1646	1993.67	1219	1431.67	1650.5	2033	2032.2	2064	883.667	918.333	2653.33	2322	1736.33	1711.67	1084	1222	1290.67	1273.33	3632.33	1374.33	11224	13099.7	0	muscle_CE
Atl3		642	804.333	775.667	889.333	2681.5	3306.17	2123.2	1822.4	2104.67	2004.67	2055	1611.33	2956.33	2822.33	4972.33	4893	4160.67	4634	3784	4010.67	676	1275.33	0	VAT_RT
Atm		769	916	1108.33	1245.67	1033.33	1262.67	1246.4	1094.2	3416.67	2872	2056.33	1715	673	731	902.333	1412	1022.33	1158	809.667	691.333	757	927.667	0	Spleen_CE
Atmin		1655.5	2029	1777.67	2155.67	577	684.333	3691.8	3583	622	646.667	773	585.667	226.333	218	303	449	420.667	304.667	521.333	582	2692	2358	0	Spinalcord_RT
Atn1		493	623.667	309.333	331.333	902.5	985.833	4578.8	4491.8	163.667	133	360.667	246.667	153.333	64	389.333	234.333	324.333	156.333	152	142.667	4442.33	3769.33	0	Spinalcord_RT
Atoh8		35.5	37.6667	27	27	12.5	11	83.6	73.4	150.333	144.667	53	66.6667	354.667	281	108.333	85.3333	108.333	57	163.333	55.6667	164.667	208.667	0	Liver_RT
Atox1		686	732	350.667	423.333	856.5	1007.17	1026.2	973.4	1069.33	1072.33	727.333	797.667	1424.67	1629.33	775.667	1424.67	857	1266.67	1867.33	2577	814.667	1221.33	0	BAT_CE
Atp10a		273	292	448.333	538	453.167	414.667	594.4	444.4	276	268	157.333	147.667	13.6667	20.3333	343.667	640.333	337.667	408	142.667	167.667	224.667	320	0	VAT_CE
Atp10d		57	88.3333	148.333	173.333	553	636.667	136.6	125.4	1845	1612	265	167.333	112	95.6667	695	621.333	698.333	741	384	356.667	105.667	155	0	Spleen_CE
Atp11a		1223.5	1517.67	2728	3146.67	1679.17	1471	5801	5363.6	1148.33	1060	774	576.667	429.667	403.333	2792.67	4758.33	2183.33	1439.67	852.333	772.333	3490.33	4187.67	0	Spinalcord_RT
Atp11b		774	999.333	1273	1500.33	5078.83	5215.67	3174.8	2803.4	2287.67	2084.67	5760.33	4533.33	928.333	821.333	1188.67	1333	1048.67	1149.67	1005.67	855.333	1060	1382.67	0	Ileum_RT
Atp11c		450.5	521.333	700	792.667	1284.83	1562.5	1005.8	935.2	1635	1393.33	1474	1161.67	6711.67	7474	1192.33	1261	999.333	1308.33	1116	935	147.333	250.333	0	Liver_CE
Atp13a1		1068	1169.67	1290	1476	1686	1906.67	1453.8	1353	1842.67	1895	2564.33	2222.33	1091	1233.67	680.667	1116	896.333	849	949	835.667	1088.67	1230.33	0	Ileum_RT
Atp13a2		3930	4304	3273.33	3982.67	2231.83	2782	6504.2	6735.4	2829	3149.67	617.333	487	472.667	524.333	753.333	990	1220.67	856	524	557.333	2066.33	2136.33	0	Spinalcord_CE
Atp13a3		1273	1641.33	1629.33	1789.67	3925.17	4646.83	1947.8	1783.4	2821.67	2736.33	7484.33	5746.33	4614.33	4379.33	2964.67	2628.33	2309.67	2493.33	2653.67	2650	1940.67	2363.67	0	Ileum_RT
Atp1a1		13069	16671	6088.33	6854.33	5160.5	6356.83	14964.8	14258	4734	5049	43863.3	34959.3	6213	6888.33	2630.33	3681.33	1581	996.667	1960.33	1913	5301	6400	0	Ileum_RT
Atp1a2		26936.5	28692.3	21822.3	24289.7	12.3333	7.16667	86495	84661.4	167.333	126	256.667	278.667	201.333	61.6667	9833	10950.7	13795	11424	44301	42018.3	109989	119453	0	muscle_CE
Atp1b1		17481.5	21961	10544	13173.7	1352.83	1792.83	47500.4	46942.4	308.667	295	15149.3	11150	545.333	593	408.667	515.667	83.6667	99.3333	406	273.333	5641.67	7929.33	0	Spinalcord_RT
Atp1b3		1834	2091.33	1652.67	1953.67	2273	2736.17	5045	4800.6	2210	2127.33	828.333	758.333	441	509	1179.33	1619	1469	1449.33	2890.33	2338	1367	1908	0	Spinalcord_RT
Atp2a1		30	41	12.3333	25	133.833	106.5	293.2	112.4	83	66	24	13.6667	47.3333	9	36.3333	29.6667	2433.67	1171.33	11548.7	5931.33	2.59019e+06	2.24514e+06	0	muscle_RT
Atp2a2		15730.5	20346.3	9841	11604.7	3855.5	4901.83	24158.4	23690.4	2802.33	2775.67	9800.67	8899.67	4667	4851.67	2640.33	4343.67	2497.67	2345	9763.33	6377.33	12390.7	16280	0	Spinalcord_RT
Atp2a3		1010.5	1048	198	237.667	12191	13609	272.6	302.8	6346.33	5726	6632.33	5255.33	29.3333	30	450.667	333.667	677.667	704.333	287.333	264.333	451.333	604	0	Bonemarrow_CE
Atp2b1		14594.5	17361.3	4213.33	5152	2056.17	2163.83	4836.6	4723.4	3347.33	3104.33	13806	10452	1032.33	1130.33	1746	3010.67	1917.67	1557.67	1120	833.333	3618.67	4551.67	0	Brain_CE
Atp2b4		3796	5021.67	3684	3600.67	6202	8049.67	3347.4	3075.2	1635.33	1982	1399	1039.67	160.667	186	6077	6531	3997.33	1473	643.667	441	1053.67	1413	0	Bonemarrow_CE
Atp2c1		3691	4654.33	3374	3850.67	2813	2780	4636.8	4466.4	2126.33	1978.67	2699	2220.33	981.667	1155	1122.67	1556.67	1165.67	1189.33	1321.33	1396	1361	1665	0	Brain_CE
Atp5a1		24764.5	28448.3	14768	17019.3	13459.7	17154.8	30430	31397.2	9540.67	10687.7	27977.7	25983.7	21752	24614	10176.3	15344.7	14262	22741.3	83931.3	91321.7	129061	141867	0	muscle_CE
Atp5b		32658	35461	16307.3	19361.3	16573	21560.8	40888	41874	10907	12536.3	31913.7	31190.3	23993	27915.3	18007.7	23728.7	23433	37778.7	123582	133563	144447	166741	0	muscle_CE
Atp5c1		5275.5	5667.33	2706.67	3334	3014.83	3581	5921	5440.2	2440.33	2417.33	6766.67	6781.67	3788.67	4587.67	4241.67	5876.33	4491.33	6801	12554.7	12330.7	33639.7	36389.7	0	muscle_CE
Atp5d		2952.5	3273	1438.67	1715.33	2026.17	2436.5	4532.6	4673	1264	1411	3594	3513.67	3272.33	3399.33	1513.33	1953	1860.33	2874.33	10201	10390	16378.7	15852	0	muscle_RT
Atp5e		1644.5	1649.33	830.333	915.333	1485.67	1702.33	2235.6	2442.6	1179	1304.67	1770.67	1973.33	1911.33	2201.67	1328	1690.67	1825.67	2886.67	7420	8836	15680.3	17725.3	0	muscle_CE
Atp5f1		3334.5	3630	1858	2244.67	2179.33	2610.5	3828.2	3715	1766.67	1826.33	4177	4158.33	2947.67	3420.33	1792.67	2558.67	1985	4277.67	8638.67	9433.67	26035	30942.3	0	muscle_CE
Atp5g1		364.5	451.667	359	417	34.3333	34.6667	98.4	80.4	104.667	124.333	286.667	264.333	191.333	230	60	180.333	61.3333	62.6667	65.3333	39.6667	24829	24955.7	0	muscle_CE
Atp5g2		18	14.3333	24.6667	34.6667	7.5	7.33333	9.8	7	46.3333	44.6667	38.3333	26.6667	15.3333	13.6667	29.6667	36.6667	24	40.6667	21.3333	29.6667	4959.33	4688	0	muscle_RT
Atp5g3		3807.5	4092	1896.33	2164.33	2723.5	3383.17	7565	7562.4	1212.33	1344.33	4420.33	4453	3902	4553.67	2075.33	2729	2397.67	3021.33	3110.67	3270.33	24165	26705.3	0	muscle_CE
Atp5h		1334.5	1354.67	794	944.333	729.167	873.667	1382.2	1414.6	669.667	670.667	1095	1119.33	787.333	932	757.333	1159	863.667	1391.67	3357.33	3393.67	13386.3	15096	0	muscle_CE
Atp5j		1315.5	1296	698.667	870.333	1302.5	1441.5	3112.4	3132.6	546.667	547	1135.67	1262	1086.67	1322.33	759.667	1090.33	899.333	1228.67	2230.67	2181.67	15725	18367.7	0	muscle_CE
Atp5j2		1762	1819.67	1079.33	1221	1332.67	1581	2831.8	2886.4	937	970	2496.67	2887	1693.67	1873	1546.33	2141.67	1855.67	4313.67	9477.67	11016.7	14712.3	16621	0	muscle_CE
Atp5k		2073.5	2390.67	883.333	1063	906.833	1051.67	2473.4	2348.4	582.667	626	1655.33	1691	1511	1653.33	1231	1626.33	1455	3014.33	6949.33	7414	10473	11558.3	0	muscle_CE
Atp5l		43	53.3333	256.333	295	11.3333	13.8333	11.2	13	337.667	273	441.333	279.333	108.333	122	220	254.667	192.333	346	438.667	369	6798.33	7872.67	0	muscle_CE
Atp5o		3503	3771.33	1717	2153.67	1490.5	1882.17	3939	3964.2	1072.33	1236	4072	4078.33	2085	2345.67	1595	2216	1850.67	3317.33	9659.33	10325.7	25996	25287.7	0	muscle_RT
Atp5s		272.5	288	234.667	306.667	133.667	176.667	452	408.8	127.667	120.333	152.667	133.333	72	93.6667	124.667	183.667	120	147.333	306	181.333	516	568	0	muscle_CE
Atp5sl		882.5	932	609	757	414.333	484.5	1301.2	1197.2	890	788	635.667	507.333	451.333	560	225	338.667	333	484	1192	1145.67	1988.33	2125.33	0	muscle_CE
Atp6ap1		7377.5	8624.33	4625.33	5403.33	5015	5719.83	11049.8	10057.6	2681	2807.33	1924.67	1696.67	1135.67	1417	1529	2559.67	1835.33	1333	1802.67	1734	6392.33	7618	0	Spinalcord_RT
Atp6ap2		4871	5824.67	3202.67	3715.67	2130.67	2270.67	5279.6	5035.2	1112	1092.33	3014.33	2518	547.667	658.333	792	1141.67	686.667	596	685.667	718.333	583.667	806.667	0	Brain_CE
Atp6v0a1		7881	9526.67	6666.33	7917.67	3150.83	3989.17	13450.8	13110.2	1506	1540.33	2080.67	1628	1108	1061.67	1646.67	2232.33	1766.67	1324.67	1360.67	1106.33	5295.67	5806.33	0	Spinalcord_RT
Atp6v0a2		1482	1706	1371.33	1567	558	664.833	1387.4	1324.6	1643	1524.33	7696.33	6683.33	1010.67	988.667	882	1301.67	1088.67	1379	2399	3331.33	1124.67	1292.33	0	Ileum_RT
Atp6v0b		3878	4156.67	2654.67	3150.67	2290	2405.5	4565.6	4277.2	1553	1541.67	1477	1486.67	927.667	1104.67	1075	1753	1243	1709	1917.67	2195.33	2972.67	3434.67	0	Spinalcord_RT
Atp6v0d1		4668	5455	2286.67	2797.67	2477.67	2733.17	5839	5675.6	1156.67	1182.67	1268.67	1110.33	1107.33	1330	1213	1618	1337.67	1115.67	1157.67	1124.33	1870	1968	0	Spinalcord_RT
Atp6v0e		433.5	475.667	385.333	418.333	1620.83	1740.5	603.4	549.6	1198.67	1167.33	1151.67	1272	434	456	1328.33	2357.67	1057	1956.67	1965.33	2576.67	538.333	821.667	0	BAT_CE
Atp6v1a		12330	15386.7	7980.33	9173.33	2601.33	2593.33	14688.4	14416	1428	1441.67	2083.33	1772	1234.67	1429.33	1469.33	2199.67	1569	1844.33	2735.33	3323.33	996.667	1464.67	0	Brain_CE
Atp6v1b2		12440.5	14557.3	7311.67	8626	4636	4876	21969.6	22492.2	1540.67	1549.33	2302	1848	842	908	1221.33	1633	1584.33	1413	2313.67	2143.67	3295.67	3872	0	Spinalcord_CE
Atp6v1c1		4787	5431.67	3107.33	3700	1157.83	1273.5	6022.4	5999.6	857	872	922.667	776	532.333	670.667	729.333	1149	784	894.667	1287.67	1303.67	1429.67	1525.33	0	Spinalcord_RT
Atp6v1d		4245.5	4794	2435.67	3106	1336.83	1475.83	4662	4715	1038	1019	1084	946	503.333	625.333	733	1561.67	715	1195.67	1530.67	1712.67	2707	3135.67	0	Brain_CE
Atp6v1e1		6761	7822	3374.33	4101.67	2664.5	2953.17	8200	8334.8	1297.33	1450.33	1997	1947.33	1259.33	1577.67	1663.33	2504	1718.33	1933.67	3008.67	3024.33	4413	5093.67	0	Spinalcord_CE
Atp6v1f		987	1064	666.333	829.667	583	636.5	1457.6	1370.8	622.667	574.333	545	563.333	370	449.667	341.667	623.667	380	426	754	974	1782.33	2073.33	0	muscle_CE
Atp6v1g1		682.5	806	433	500	541.333	582.5	671.4	715.2	404.667	367.667	600.333	554.333	282.667	323	432.667	1089.33	417.333	599.667	473	684	5880	5661	0	muscle_RT
Atp6v1g2		3137	3747.33	1504.33	1871.33	116.833	116.167	8518.6	8124.2	84	80.6667	61.3333	55	20.6667	19.3333	53.6667	127	49	64.6667	50	36.3333	97	103.333	0	Spinalcord_RT
Atp6v1h		4473.5	5016.67	2842	3323	827.833	896.167	4702.6	4726.4	1198.33	1102.33	1538	1418	988.333	1245.33	1583.33	2093	1489.67	1962.33	2008.33	2174	680.667	955.667	0	Brain_CE
Atp7a		279.5	382.667	447.333	446.667	713.167	693.667	529.2	510.8	871.333	758	2355.33	1993.33	218.333	242.667	587.333	1292.67	510	441	411.333	322	422.333	604.667	0	Ileum_RT
Atp8a1		6548	8069.67	8410.67	9651.67	4152.33	5253.33	10924.4	9745.2	4905	5080.33	1829	1383	162.667	186.333	695.333	1098	1004.33	1648	1709	2859.67	5525.67	7510.33	0	Spinalcord_RT
Atp8b1		60	87.3333	85.6667	95	45.8333	62.5	156	165.8	230.667	279.667	18816	16247.7	1582.67	2113	265.333	557.667	376.667	247.333	137.333	121.667	79	155.333	0	Ileum_RT
Atp8b2		1645	1978	2379.33	2795.67	720.167	807	3405.4	3245	1741	1647	646.667	483.667	65.6667	72.3333	515.667	875	872.667	553	387.333	325	474.667	693.333	0	Spinalcord_RT
Atp8b4		6	6.66667	6.33333	6.66667	4367.5	4100.33	9	12.4	657	656	56.6667	35.6667	59	60.6667	120.333	100.333	207.667	233.667	38	26.3333	13.6667	18	0	Bonemarrow_RT
Atp8b5		10.5	9.33333	53.6667	61	16.8333	16.8333	53.2	49.2	27.3333	18.3333	62.3333	29.6667	12.3333	17.6667	62	82.3333	37.3333	56.6667	45.3333	60.3333	5	7	0	VAT_CE
Atp9a		10798	12285.7	8517.67	10048.3	33.3333	37.6667	13282.2	13125.8	310	299.333	5522.33	4940	1484.67	1692.33	2405.67	3401.33	3075	2235.67	2730.33	3117.33	1931	1759.33	0	Spinalcord_RT
Atp9b		1770.5	2093.67	1756.67	2042.33	936	1032.83	2477.8	2346.2	1776	1694.67	1577.67	1291	943.333	1011	1351	1798.67	1534.33	1431	1513	1344.33	1244.67	1443.67	0	Spinalcord_RT
Atpaf1		219	275.333	164.667	207.667	25.8333	32.1667	367	369	106	89	133.667	90	63.3333	61.3333	71.6667	109.333	96	93.6667	104	105	1483	1781	0	muscle_CE
Atpaf2		334.5	396.333	420	503.667	429	545.5	727.8	710	383.333	385.667	533	434	372	403.333	677.333	804.667	893.333	1432	3487	3828	1358.67	1606.67	0	BAT_CE
Atpif1		2763.5	2940.33	1622	1959.67	4036	5332.17	2778.2	2880.8	1625	2205.67	3778.33	4030.33	195	228	620	1323.67	384.667	368	208	178.333	651.667	738	0	Bonemarrow_CE
Atr		583.5	653.333	1043	1205.67	835.333	962.667	885	788	2370	2057.33	1581.67	1326	663	691.333	1035.33	1547	846.667	1277.67	904.667	815.333	364.667	523.333	0	Spleen_CE
Atraid		983.5	1093	979.333	1107.67	388.167	439.5	1529.6	1469	563.333	539.333	747.333	739	792	1137.33	1223.67	1822.67	1316.67	1190.33	1766.67	1441	1869	2147	0	muscle_CE
Atrip		395.5	474.667	437	501.333	222.833	299.667	529.6	528.2	411.667	403.333	278.667	213.333	177.667	194	218.667	329	257	271.667	282	209.667	524.667	575.667	0	muscle_CE
Atrn		3335.5	4421.33	4229	4877	2044.83	2134.5	6899.8	6499.4	1167.67	1125.67	2285.33	1650.67	2944.33	2723.33	1167.33	2033	1273.33	1408.67	1517.67	1405.33	1497.67	2213	0	Spinalcord_RT
Atrnl1		4660.5	5471.67	2062	2407.33	782.833	672	2256.4	2155.2	2402	2213.33	3792	3521.33	1326.67	1506	1732	1926.67	2317.67	1766	1183	1030.67	574	699.667	0	Brain_CE
Atrx		4803	5856	5310.33	6230.33	4724.5	5447.5	4242.2	3999.6	9325	7752	6252.67	5065.67	2141.33	2554.33	3672.33	6377.67	3796	4562	3935.33	3026.33	2163.33	2929.33	0	Spleen_CE
Atxn1		4973	5120.33	2601.67	2959.33	347.5	372.833	1197.6	1137.8	1278.33	1206	3028.33	2407	1805.33	1395	1132.67	1360	1040	973	1255.33	1059.33	2245.67	2942	0	Brain_CE
Atxn10		5290.5	5778	3660.33	4652.33	2668.67	2639.17	8237.8	8086.8	778.667	787	461	320	1054.67	1123.67	1475	1307.67	1446.67	833.333	760.667	623.333	1680.67	1691.33	0	Spinalcord_RT
Atxn1l		791.5	1054	992.333	1152.67	1262.5	1397.5	1512.8	1379.6	1329.67	1181.33	1238.67	986	724.333	742	956.667	1033	1065.33	875.667	1134.67	1259	1526	1943.33	0	muscle_CE
Atxn2		1013.5	1284	1996	2202.67	896	1105.83	3440.8	3207.2	1023.67	992.333	1522	1190	1684.67	1403.67	951.333	1141.67	921.333	1295.33	2663	1805	2391.67	2967.67	0	Spinalcord_RT
Atxn2l		665	809	1126	1324.67	5161.33	6011.67	4785.4	4467.6	1664	1518	1629	1297.67	669.667	517	916.333	1030.67	1052.67	902.667	832	649.667	2566.67	3122	0	Bonemarrow_CE
Atxn3		664.5	735.667	647.333	786.667	1220.33	1398.17	933.2	845	1270	1207.33	994.333	812.667	595.333	624	1021.67	1147.67	677.667	811.667	614	572.667	275.333	413.333	0	Bonemarrow_CE
Atxn7		579.5	627	697.667	838.667	1070.5	1191.67	1070.8	1033.6	1409.33	1275	1634.33	1392.67	650.667	635.667	857	959.667	831	924.333	848.333	698.667	1341.67	1947	0	muscle_CE
Atxn7l1		173	235.667	456.333	557.333	1177.67	1330.17	710.4	641.6	794.667	732.333	691	488.333	298.667	232.333	507.667	684	597.333	566.333	273.333	298.667	733.333	785	0	Bonemarrow_CE
Atxn7l2		217	227.333	265.333	315	170.167	198.167	393	378.2	188.667	188	126.667	105	31.6667	34.6667	82.3333	106.333	84.6667	92	77.6667	56.3333	483.333	522.333	0	muscle_CE
Atxn7l3		3288	3888	2083.33	2440	2318.33	2529	6066.4	6134.8	1447.33	1428.67	1374.33	1274.67	452.667	524.333	680.333	918.667	731.333	738	873.333	643.667	1129.67	1253.33	0	Spinalcord_CE
Atxn7l3b		3541	4311.33	3166	3730.67	2760.33	3187.33	5959.2	5534.8	1990.33	1970.67	3485.67	2902	2111	2322	1293	1758.67	1402.33	1204.33	1553.33	1477	796.333	1190.67	0	Spinalcord_RT
AU022252		699.5	857.333	584.667	679.333	103.167	115.667	352.2	357.6	438	429.667	376.667	298.333	1810.67	1715	511.667	555	549	520.667	604.667	603.333	714	748	0	Liver_RT
AU040320		1584.5	1766.67	1424	1699	1089	1122.67	2505.2	2484.2	973.333	917	3792	3274.67	704.333	698.333	646.333	1113	774	612.667	850.667	992.667	3119	3113.33	0	Ileum_RT
AU041133		185.5	165.333	252	281.333	34.8333	47.1667	193.6	133.8	337.333	269.333	233	181	88.6667	99.6667	209.333	285.333	189.667	224.667	42.3333	95.3333	12.6667	24.3333	0	Spleen_CE
Auh	lipid_GO	1393.5	1567	1023.67	1241.33	382.833	417.167	1928.8	1922.8	620	585.667	685.667	541	648.333	729	906.333	1080.67	1310	1378.33	2448.67	1936.33	1897	2225	0	BAT_RT
Aup1		734.5	795	670	778.667	2712.33	3262.33	1662.8	1642	1510	1591	1654.33	1431.33	1585.67	1790.67	720	1108.67	932.333	1035.33	1279.67	1312.67	3574.33	3299.33	0	muscle_RT
Aurka		30	36	17.3333	24.3333	2559.17	3083.83	57	53.6	522	820.333	515.333	504	88.6667	63.6667	30	48.3333	43.6667	43	26.3333	45	513.667	456	0	Bonemarrow_CE
Aurkaip1		1342.5	1436.67	750.333	932	995.833	1148.83	1575.2	1576.2	801	800.667	1049.33	1058	854	1065	819.667	1272.33	1014	1292.67	2053.67	2228	2617	2751.67	0	muscle_CE
Auts2		729.5	938	937.333	1114.67	25.8333	25.6667	1129.4	1128.8	83	64	680	518	21.3333	19.6667	588.333	970	362.333	330.667	110.667	93.3333	1534	2122	0	muscle_CE
Aven		160.5	171.333	146.333	189	202.333	255	703.4	678.8	291	305.333	293	261.333	294.333	302	148	167	212.667	218.667	295	379	708.667	747	0	muscle_CE
Avil		14.5	22.6667	42.6667	36	8.16667	11.1667	57.6	18.6	21	21.6667	238.333	170.667	8.33333	7.33333	13.6667	22.6667	28.3333	22.3333	47.3333	23.3333	693.667	1208.33	0	muscle_CE
Avl9		1917.5	2356	2453	2734.33	958.833	997	2474.8	2341.6	1919.33	1781.33	2990.33	2763	903.667	1036.67	1152.67	2097.33	1005	1000.33	950.667	870.667	195.333	318.333	0	Ileum_RT
Avpi1		429.5	531.667	160.333	210	27.3333	30.8333	329	325.4	176.667	190.333	78.6667	73	458.667	529.667	99.6667	280.333	117.667	165	218	320.667	498	586.667	0	muscle_CE
AW011738		58	65.3333	89.3333	93.3333	376.333	460.5	186	172.6	388.333	403.667	70.6667	62.3333	47.6667	70.6667	38.6667	76.6667	47.3333	59.3333	117.333	91.3333	148	191.667	0	Bonemarrow_CE
AW146154		89.5	96.6667	154	174.667	81.1667	94	118.8	94.6	299	235.333	352.667	277	146	138	219	362.667	191.333	216.333	100.667	123.333	141	227.333	0	VAT_CE
AW209491		367	416	432	542	225.833	239.667	516.2	490	172.333	155.667	207	189.667	234	233.667	134	239	153.333	174	376	325.333	779.333	942.667	0	muscle_CE
AW549877		951.5	1284	1134.67	1220.67	944.333	1107.83	2409.2	2123.4	1463.67	1171	1505.33	1084	679.333	581	1820	2157	1364.67	1824.67	1923	1689.33	871.333	1110.67	0	Spinalcord_RT
AW554918		579	576.667	475.333	603.667	258.167	289.333	481.6	432	476	384.667	345.667	262.667	91.6667	84.6667	357.667	438	343	290.667	223.333	200.667	225.333	282.333	0	Hypothalamus_RT
Axin1		447	552	631.333	694.667	1422	1667.33	869.4	854.6	1289.67	1283	1158.33	999.333	428	486	482	651	635.333	524.333	627.667	587.667	1354.67	1569	0	Bonemarrow_CE
Axin2		821	847.667	814.667	945.667	88.8333	93.5	544.4	521.2	252.333	235.333	2626.33	2573.67	280.667	224.333	761.333	929.333	268.333	374.667	588	441	322	450.333	0	Ileum_RT
Axl		1198	1315	1030	1185	2651.5	4091.33	2737.4	2711	7329.33	7652.33	807.667	579	510	635.667	1449	1963.33	3498.67	1372.33	1027.33	877	2652.67	3976	0	Spleen_RT
Azi2		1414	1632.33	1372.67	1559.67	1374.67	1525.17	1751.6	1793.2	1589.67	1517.67	3305.33	2920.33	922.333	1018.67	1026.67	1440.67	1147.33	1387.33	2087.67	1972.33	1358	1820.67	0	Ileum_RT
Azin1		3596	4424.67	2135.33	2357	8379.67	10614.2	4595.6	4286.8	3830.33	4088.67	6201.33	5667	1725.33	2243	1902	2466.33	1203.33	1817	2323.33	2069	2174.33	2556	0	Bonemarrow_CE
B230118H07Rik		524	526	486.667	607.667	140.5	160	997.2	968.6	69.6667	67.3333	127	111.667	197	219.667	407.667	658.667	454.667	566.333	736.667	720.333	2813.33	3095	0	muscle_CE
B230219D22Rik		1421.5	1783.67	1882.33	2244	2098.33	2309	2615.8	2322	2168	1978.67	1724.67	1405.67	1004.33	1000.33	1390	1806	1226	1448.33	1390.33	1585.33	1923	2449	0	Spinalcord_RT
B2m		1281	1380.67	834.333	972.667	15375.5	15537	2528.6	2128.2	24207.3	21607.7	24918.3	22373.3	18849.3	23754.3	15023.7	16262.7	20802.3	16281.7	6591	4156.67	3247.33	4777.67	0	Ileum_RT
B3galnt1		1026	1211	910.333	1112.67	45	57.3333	1028.6	948.8	83.6667	71	122.667	73.6667	14.6667	13	335.333	305.667	455.333	308.333	133.333	95.6667	128.333	205	0	Brain_CE
B3galnt2		270	372.667	490.333	554	1042.5	1254.67	568.4	594.4	1074.67	1079.33	861	786	617.667	713.333	415.667	820.667	465.333	527.667	652.333	479.667	6809.33	8742.33	0	muscle_CE
B3galt4		92	96	82	90.6667	130.167	127.333	105	104.8	174.333	166	165.667	169	8.33333	12	47.6667	69.3333	46	42.6667	44.3333	25.6667	79.6667	85	0	Spleen_CE
B3galt6		259.5	290	347	434	123	167.667	257.6	254.2	211.333	213.333	167	159.667	49.6667	86	80.3333	197.667	97.3333	120	176.667	131.333	92.6667	103.667	0	Hypothalamus_RT
B3gat3		2720	2958	1572.33	1868.33	833.667	925.5	3098	3075.2	701	710.667	505.667	476.333	701.333	758.667	388.333	690.333	509	620.667	864.333	997	1638.67	1793	0	Spinalcord_RT
B3gnt2		672.5	785.667	457	508.333	2277.67	2648.83	677.8	606	1556	1317.33	909.667	735.667	409.333	499	227	230.333	292.667	316.667	225.333	211.667	171.333	246.333	0	Bonemarrow_CE
B3gnt3		17	15.6667	9	14	142.167	208.667	27.6	17	115.667	113.333	3387.33	3101	34.6667	51.3333	102.667	113.333	160	107.333	153	126	150.667	174	0	Ileum_RT
B3gnt8		32.5	29	61.3333	77	390.667	456.667	25.8	16.6	514.333	419.333	133	74.3333	71	76.3333	138.667	147	123.333	191	87.6667	120	31	56	0	Spleen_CE
B3gnt9		85	85	88	106	34.3333	33.8333	281.8	232	127.333	121	99.3333	85	50.3333	53.3333	108	115.333	146.667	85.3333	55.6667	39	142.667	175.667	0	Spinalcord_RT
B3gntl1		78.5	82	232.667	292.667	142.833	165.667	212.8	208.4	305	274	275.333	219	69.3333	57.6667	169.333	284	217.667	184.667	179.333	162	132.333	165.667	0	Spleen_CE
B4galnt1		923	1085.33	634	737.333	2862.33	3052.17	2107	2179.2	2387	2189.67	2335.33	1947.67	723.667	818.333	81	545.667	310.667	424.333	28.6667	24.3333	33.6667	57.3333	0	Bonemarrow_CE
B4galt1		94	120.333	106.667	119.667	3652.83	4022.33	231.8	189.2	1456.33	1587.67	3722	3234.67	1012	1110	1563.33	2022.67	1524	1250	1922	1591	2322.67	2929.67	0	Bonemarrow_CE
B4galt2		1391	1506.33	734	868	7.66667	11.6667	774	700	59	51.6667	63.3333	44	8.66667	5	146	133.667	130.667	63.6667	43.3333	29.3333	166	179.333	0	Brain_CE
B4galt3		371.5	504	420.667	482	1015.17	1083.83	741.4	714.8	519.667	507.667	534.333	473	114	139.333	179	346	172	203.333	231.667	173.333	473.667	588.333	0	Bonemarrow_CE
B4galt4		399	412.333	294.667	378.333	183.5	189.167	484.6	426.6	175.333	183.667	1272.67	1056.33	18	27	185	846.333	106.667	100.333	171.667	217.667	157	206	0	Ileum_RT
B4galt5		996	1178.33	831	997.333	933.667	896	1727.2	1706.8	955.333	924.667	1662	1249.67	323.667	413	171.333	300.333	303	225.333	146.667	144.667	753.333	924.667	0	Spinalcord_RT
B4galt6		1574.5	2098.67	2070.33	2335.67	1021.67	897	3366	3283.4	165	173.333	2086.67	1602	50	46.6667	307	235.333	318	270.667	83.3333	99.6667	91	147	0	Spinalcord_RT
B4galt7		321	380	379.333	440.667	218.167	236.333	520	486.8	339.667	324.667	337.333	288.667	160	203.667	183.333	248	223.333	231.333	254.333	207	290.333	383.667	0	Spinalcord_RT
B630019K06Rik		545	646	1722	1819.67	11.5	12	1904	1848.4	39.6667	32.3333	36	19.3333	17	17	29.6667	44.6667	41.3333	21.6667	15.3333	16	11.3333	10.6667	0	Spinalcord_RT
B9d1		206	204	304	356	10.5	15.6667	252	215.6	44.6667	37.3333	75.6667	50	11	11.6667	100	162.667	80	65.3333	67	67.6667	72.6667	116	0	Hypothalamus_RT
B9d2		175	202.333	118	150	329.5	421.333	283.8	281.8	215.333	207.333	51	34	36.6667	42.3333	60.3333	83.3333	55	61.6667	73.3333	85.6667	247.333	313.667	0	Bonemarrow_CE
Babam1		1148	1263	817	988	1164.67	1374.5	2304.6	2368.6	800	777.667	880.333	794.333	776	899	506.333	704	592.333	670.333	953.333	1235.33	3441	3140.67	0	muscle_RT
Bace1		1999.5	2503.67	2727.33	3076.67	437.667	437.167	4519.4	4244	734.333	716.667	953.333	670	1272.67	1061.33	891.667	1025.33	1045	847.333	1109	923.333	2886.67	3111.33	0	Spinalcord_RT
Bace2		113	117.667	82	103	15.6667	22.3333	518	457.4	303.333	289.333	435.667	347	114.333	140	122	153	83.6667	43.6667	46	32	112.333	163.667	0	Spinalcord_RT
Bach1		435.5	474.333	576.333	667.333	2114.83	2273.17	650.6	643.2	1320.67	1350.33	4701	4707.33	930	1210.67	749.667	824	993.333	716.333	929	749.667	1335.33	1776.33	0	Ileum_CE
Bach2		139	179.333	207	221.667	2142.67	3098.5	434.2	384.2	1819.67	1499	421.333	242.333	296	276	78	118	251	286.333	47.3333	34.6667	59.6667	84	0	Bonemarrow_CE
Bad		509.5	535	324	353.667	331.333	373.833	673.4	649.8	237.333	229	569.333	582	196.333	249	323	392.333	345.667	313	403	385.667	428.333	548.333	0	Spinalcord_RT
Bag1		1867	2054.67	1169.33	1496.33	2151.67	2607.5	3070.4	3204.8	1276.67	1464.67	2844	2820.33	1385.33	1655	2822.33	3543.67	3080.67	4018.67	5477.67	6781.33	6823	7641	0	muscle_CE
Bag2		155.5	195	223.333	249	380.333	569.333	346.8	329	141.667	233.333	105.333	96	36.3333	47.3333	116.667	231.667	67.3333	116	277.333	206.667	1016.67	1142	0	muscle_CE
Bag3		113.5	134.333	114	121.333	271	386.5	1260.6	1266.8	145	134	498.667	475.333	377.667	299.667	493	591.333	488.333	403	692	620.333	8989.67	9463.67	0	muscle_CE
Bag4		1666.5	2105.67	1603.33	1994	412.667	495.667	1199.6	1131	600.667	569	1324.33	1182.33	977.667	1027	1518.67	1729	1424.33	1120.33	1413.67	1001.33	274.333	395	0	Brain_CE
Bag5		1011	1202.67	613	710	363.667	418.5	1042.4	1109.4	421.667	453	331	310	254.667	306.667	317	466.333	377.667	319	477.333	460.333	712.333	912.333	0	Brain_CE
Bag6		3228.5	3566.33	3033.67	3570.67	3737	4530.5	5459.6	5587.4	1908.33	1998.67	2662.67	2183.67	1440.33	1428	1976.33	2019	2133.33	1580	3097.33	2355	13273.3	11531	0	muscle_RT
Bahcc1		266	306.667	456	556.667	367.833	419.667	1005	954.4	133.333	134	450.667	360	214.667	139.333	693.667	433.333	749.667	381	315.333	352	534.667	667.333	0	Spinalcord_RT
Bahd1		603	732.333	424	481.333	829	1031.83	767.4	788	870.333	840.333	819.667	683.333	244.333	257.667	359.667	538.333	421.333	308.333	308.333	246.667	425	532	0	Bonemarrow_CE
Baiap2		3088	3700.33	991	1022.33	231.833	243.667	931.8	994.4	283.333	263.667	214	190	740.667	613	874.333	1177	870	527.667	347	291.667	115	232.333	0	Brain_CE
Bak1		125.5	151.667	135	149	1687.67	1834.17	469.8	454	623.333	645.667	2562.33	2501.33	157.667	179.333	215.667	250.667	282.333	304	370	301.667	1018	1057.33	0	Ileum_RT
Bambi		117	150	104.667	96.6667	53.6667	59.3333	135.2	156.6	226.667	169.333	261.333	267.333	57.3333	92.6667	70	209	55	39	36.6667	26.6667	52	62	0	Ileum_CE
Banf1		520.5	507.333	205.667	242	1761.5	2177	725	694	567.667	638.667	634.333	621.667	262	308.667	209	312.333	252.333	272.333	618	549	3790.67	4048.33	0	muscle_CE
Bank1		25	28.3333	19.6667	21.3333	593.167	783.5	20.8	14.4	11107.3	8638	867.333	404.333	72.6667	89.6667	177.333	146	790.667	1435.33	53.6667	61.6667	22.6667	38.3333	0	Spleen_CE
Banp		519	674.333	810	737.667	565.167	663.333	544	608.4	912.333	815.667	360	538.333	198	184.667	202	369	264.667	505.667	210.333	337	328.333	610.667	0	Spleen_CE
Bap1		3084	3378.67	1695.67	2025	1669.33	2070.5	3854.6	3767.8	1176.33	1241.67	943	844.667	674.667	798.667	661.667	867	822.333	705.667	1364.67	1259	3874.67	4084	0	muscle_CE
Basp1		3894	4796.33	4897.33	6316.33	178.167	182.5	3150.6	3158.2	520.333	493.667	163.333	101.667	21.3333	26	419	1385.33	227.667	134.333	33.3333	33.6667	68	84.3333	0	Hypothalamus_RT
Bax		454	490.667	307	365	669.5	826.333	700.4	735.6	680	708.667	490.667	500.667	219	276.333	282	384	320.333	329.667	263.333	279.667	554	661.333	0	Bonemarrow_CE
Baz1a		64	78	44.3333	43.3333	4335	4682.33	52.6	67.4	4790.33	4695.67	2110.33	1955.67	339	405.667	581.667	775.333	769.333	1004.33	699.667	534.333	133	236.333	0	Spleen_CE
Baz1b		2739	3479.33	4580.67	5188.33	7103.67	8168.83	4049.6	4032	6059.67	6106	4819.67	4007.67	1902	2012.67	3251.67	3893.33	3763.33	3650.33	4186.67	3589.33	3715.33	4732.67	0	Bonemarrow_CE
Baz2a		676.5	946.667	1438.67	1513	5868.17	6562.5	2415.2	2275.4	3136.33	2988.67	4093.67	2971.33	1151	990.667	1489.33	1753.33	1624.33	1555.33	1749	1324.33	1918.67	2448.33	0	Bonemarrow_CE
Baz2b		1285	1485	2148.33	2544.67	2537.83	2720.17	1985.2	1854.8	4526.67	3991.33	3750	2953	726.333	804	2538	3243.67	2397.67	2566	2068.67	1739	838.333	1205	0	Spleen_CE
Bbc3		72	89	51.6667	67.3333	161.5	225.5	99.6	96.4	142.667	165	128.667	131.667	143.333	192.667	127.667	188.333	178	211	137.667	193	36.3333	67.3333	0	Bonemarrow_CE
Bbip1		484	504.667	457.667	540	712.167	769.833	878.4	833.2	549.333	520	586	576.333	193	180	290.667	523.667	265.667	456.333	370	414.667	1133	1505	0	muscle_CE
Bbs1		580	714	1048.67	1206.33	81.3333	128.667	954	890	85.6667	85.6667	79.6667	62.3333	35	33	171.333	195.667	140.667	90.6667	136.667	107.333	119.667	179.333	0	Hypothalamus_RT
Bbs10		131	141	169	187	47.8333	69	186	175.6	147	123	69.3333	50.6667	136.333	167	121	160.667	131.333	143	129.667	157.667	98	107	0	Hypothalamus_RT
Bbs12		103	95.3333	174	190.667	102	121.5	166.2	156.4	125	134.333	79	53.3333	8	8.66667	77.6667	158	81.3333	77	36.6667	36	39	55	0	Hypothalamus_RT
Bbs2		534	663.667	814.667	1001.33	106.167	123.833	1075.8	947.6	276.667	271.667	183.667	152	62.3333	66.6667	270	508	249	196.333	305.333	235.667	247.333	264	0	Spinalcord_RT
Bbs4		1075	1233	1202.33	1419.67	99	122.833	1625.4	1461.6	195.667	148.333	153.667	118.667	101.333	99	156.667	253.667	136.667	129.667	118	125.667	375.333	452.667	0	Spinalcord_RT
Bbs5		244	282.333	284	340.333	19.3333	27.8333	306.6	322.2	39	32.6667	73.3333	60.3333	50	64	118.667	221.667	77	107	123.667	111.667	128.667	179.333	0	Hypothalamus_RT
Bbs7		407	441.667	517.333	656.667	62.3333	88.1667	571.4	504.6	74.6667	77.3333	111.667	107.333	85.3333	87	148.333	174.333	130	112.333	124	155	451	541.333	0	Hypothalamus_RT
Bbs9		2272	2189.67	1529.67	1784.33	264.5	284.5	524	483	618.667	538.333	264	188	145.667	147	340.333	724.333	319	287.333	264.667	211.333	362.333	468.667	0	Brain_RT
Bbx		1032	1240	1493.67	1638.67	578.5	671.333	1115.8	1056.2	2202.33	1911.67	1211.33	889.667	674.333	714.667	1376	3095.67	1057	1082.33	909	911.333	454.333	696	0	VAT_CE
BC003965		529.5	629.667	361.333	459.333	369.5	459.167	802.8	823.6	403.333	421.667	439	446.667	375.333	476.333	378.333	546.333	462.333	624.333	1106.67	1170.67	1102.67	1463	0	muscle_CE
BC004004		1325.5	1507	931.667	1150	947.333	1120.33	1678	1546.2	993	896.333	1280	1114.33	1726	1938	1059	1661.33	1215.67	1622	3047.33	3039	4674.33	4971	0	muscle_CE
BC005537		2060	2639.67	2008.33	2307	6723.5	7703.67	4154	3794.6	4019.33	3813	4638	3642.67	3074.67	2445.67	2743.33	3226	2679.33	2517	2692.67	2617.33	2543	3435.67	0	Bonemarrow_CE
BC005561		331	425.667	868.333	1026.33	177.667	216.833	463.2	460.2	644.667	606.333	977.333	877.667	546.333	588.667	457.333	846.667	433.333	631.667	575.667	437	214	332.667	0	Hypothalamus_RT
BC005624		770	844.667	655.667	830	560.5	658.5	1438	1437.4	522	484.333	433.667	419.333	228.667	291.333	266.667	373.333	294	280	293.333	292.667	1372.67	1543	0	muscle_CE
BC017158		275.5	310.667	411	507	718.167	983.667	779.2	767.4	571	700.333	713	620.333	331	360.333	300	505.667	378.667	363.333	275.333	245.667	186	253.667	0	Bonemarrow_CE
BC024978		97	139	133.667	150.667	49.3333	48.8333	220.6	226	131	113.333	358.667	276.667	168.333	109.667	144	162	128	137	127.333	86	326.333	299	0	Ileum_RT
BC025920		45.5	59	50.6667	45.6667	93.8333	104.833	122.4	110.8	123.667	108.333	61.3333	39.3333	24.3333	28.3333	31.6667	49.6667	39	77.3333	96.3333	171	211.667	245.333	0	muscle_CE
BC028528		21	18.3333	32.6667	38	187.5	168.833	60	55.2	292	250.333	50.3333	43.3333	14.3333	13	96	99.6667	103.333	210	427.333	921.333	49	99.3333	0	BAT_CE
BC029722		486	501	450.333	582.333	261.333	279.833	2082.2	1971.6	162.333	155.333	66.3333	55.6667	75.3333	102.667	202	266.667	226.333	218	330	344.333	1102.67	1278.67	0	Spinalcord_RT
BC031181		1414.5	1527.33	859.667	1000.67	573.5	650.167	1872.8	1795.2	444	439	953.333	1001.67	571.667	748.667	636	906.333	613.667	856	1002.33	1080	930.333	1051.33	0	Spinalcord_RT
BC035044		10	20.3333	8.66667	14.6667	834.667	1010.67	26	22.4	1001.67	821	87.3333	54.3333	6	8	55.6667	40.3333	88.6667	100.667	18	11	5.66667	8.33333	0	Bonemarrow_CE
BC048403		102.5	118.667	54.3333	82.3333	175.333	186.333	272.6	256.2	82	64.3333	61.3333	43.6667	55.3333	50.6667	64.3333	76.3333	66.6667	38	41	24	95.6667	119.667	0	Spinalcord_RT
BC052040		96.5	122.667	94.3333	122.667	260.5	319	253.4	228	113.667	109.333	143.667	120.667	57.6667	51.6667	48	62.6667	50.6667	45	43.6667	32.3333	339.333	296.667	0	muscle_RT
BC055324		34.5	37	51.3333	68.3333	474.167	573.167	65	59	211.667	222.667	227.667	181	23.3333	16	38.3333	64.6667	33.3333	45	26	22.3333	10.6667	11.3333	0	Bonemarrow_CE
Bcam		440	481.667	600	673	20.8333	25.6667	794.2	735.8	529.667	488.333	179.667	143.667	88.3333	88.3333	565	887	530.667	246	654	569.667	1709	1765.67	0	muscle_CE
Bcap29		501	572.333	420.333	497.667	450.667	577.167	1051.4	944.6	316.667	300.333	287.667	198	144.333	128.667	319	339.333	247.333	312	269.333	300	901	1173	0	muscle_CE
Bcap31		1367.5	1458.33	1014.33	1211.67	1890	2168.33	2799.4	2591.2	1430.33	1385	2897.33	2909.33	1767.33	2144.33	2646.67	3164.33	3009	3164.67	3988.33	4734.33	2024	2365.67	0	BAT_CE
Bcar1		876	984.667	753.333	857.667	34.1667	42.3333	1838.2	1803.6	296	298.667	2288.33	2105.33	605.667	672	361	586.667	338.667	349.333	409.333	403.667	775	898	0	Ileum_RT
Bcar3		430	499.333	423.667	473	183.333	207.333	417.4	491	1729	1473	2138.33	1718	1287	1398	1561	1113	1800.33	934.333	397.667	281.667	224.667	306.333	0	Ileum_RT
Bcas2		710	849	1008.67	1143.67	1117.5	1465.17	1099.8	1099	1040.67	1108.33	837	724.667	344	477	487	780.667	526.667	549	665.667	560.667	1437	1770.67	0	muscle_CE
Bcas3		1365.5	1607.67	878.333	1038.33	663.333	862.833	1749.8	1768.2	842	880.333	711	527.333	580.667	610.667	604.667	887	693.333	576.667	851	635.667	2347.33	2130.67	0	muscle_RT
Bcat2		225	235.667	212	220.667	907.333	1085.67	331	322.4	613	606.333	450.667	394.333	799.333	903	2096	2702.33	2370	1777.33	1780.33	1374.67	3774.33	4028	0	muscle_CE
Bccip		548	621.333	346.667	446.667	811.667	1040.5	911.8	976.8	544.667	527	541.333	547.667	634.333	788.667	512	615.667	551.333	588.667	735	707.333	3164.33	3399.33	0	muscle_CE
Bcdin3d		78	79	72	83.6667	86.8333	101.167	123	111.4	113	106.667	93.6667	91	51.6667	44	55	77	53	50.6667	71.6667	92.6667	166	243	0	muscle_CE
Bckdha		350.5	370.333	183.667	221.333	737	811.5	1469	1399.8	180.333	162	145.667	118.667	1023	1260	548.333	855.333	822.333	1078.33	3346.67	3530	7746	8550.33	0	muscle_CE
Bckdhb		1377.5	1319	530.333	641.333	86.5	98	936.8	858.8	195.333	154.333	156.667	138	1161	1225.67	938.333	1262	1115.33	1358.33	2335	2363.67	1148.67	1254.67	0	BAT_CE
Bckdk		924.5	974.333	624.667	749.667	1154.83	1371.17	1161.4	1116.4	734	859	888	738	288.667	338.667	822	1284.67	1158.33	1368.67	2951.67	2643	10144	9512.33	0	muscle_RT
Bcl10		306.5	380.667	222.667	275.667	1292.83	1296.83	377.8	373.8	1093.33	1141.67	1207.33	1267	190	246	315	452	409	397.667	394	405.333	521	726.667	0	Bonemarrow_CE
Bcl2		475.5	581.667	925	1015	608	639	842.8	900.2	2666	2446.33	652	447.333	47	57	660.333	649	798	705.667	163.667	142.333	191.667	252	0	Spleen_CE
Bcl2l1		1767	1880.33	1146.67	1389	4474.67	6484.17	2972.4	2867.4	1234.33	1602.33	899.333	732.333	518.333	513.667	506	523.667	429	340.667	604.333	599	604.667	716.667	0	Bonemarrow_CE
Bcl2l11		113.5	136	113	122.333	840.667	986.833	217.2	202.8	963.667	1049	451	295	120.667	104.667	265.333	465	232.333	231.667	171.667	106	324	457.667	0	Spleen_RT
Bcl2l12		25	26.6667	34.6667	44	256.5	318.667	72.2	69.8	347	326.333	202.667	199	101.333	118.333	152.333	211	172.667	180	157	139	281.333	353.333	0	muscle_CE
Bcl2l13		966.5	1132.67	718.333	805	2660.33	3538.5	1619.2	1568.6	1164	1254	1154	873	995	901.333	1054	959.333	1231	1174	3283.67	3050.33	6507.67	6662.33	0	muscle_CE
Bcl2l2		2668	3101.67	1630.33	1907.67	358	392.167	5241.8	5079.6	460.667	423.667	1264	1266.33	419.333	490.667	1239.33	1398.67	1123.33	1077.33	1159	1203.67	2072.33	2624	0	Spinalcord_RT
Bcl3		7.5	11	16	20.3333	490.167	426.833	32.4	28.6	598	621.333	689.667	735.333	342.667	400	90.3333	69.3333	147.333	168	400.667	323	69.6667	92.3333	0	Ileum_CE
Bcl6		495.5	726.667	324	316.333	1238.33	1250.5	795.2	896.2	1107.33	832	362	256.667	1443.33	601.333	663.333	738.667	659.333	846	2516.67	1100	4327.33	6519.33	0	muscle_CE
Bcl6b		33	40.3333	33.3333	48.3333	33.6667	38.3333	62.8	58.2	197.667	192.667	59.3333	62	32.6667	52	343.333	386	233.667	353	512.333	335.333	349.667	582.667	0	muscle_CE
Bcl7a		923.5	1159.67	794	942	1651.5	2323.17	1434.4	1370.4	1023.67	940.667	464.333	345.667	272.667	218	408	596.667	333	382	546.333	348.667	815.333	913	0	Bonemarrow_CE
Bcl7b		671	771	540.667	628	549.167	675.833	1264	1220	544.333	549.333	380	349	174.333	216.333	444	560	522.667	555	771.667	982	1059.33	1091.67	0	Spinalcord_RT
Bcl7c		206	275	402.667	406.333	136	147.833	93.4	131.8	216	224	144	120.667	56.3333	63.6667	109.667	187.333	142.667	112.333	128	112.667	470.333	487.333	0	muscle_CE
Bcl9		292	373	458.333	512.333	414.167	472.5	1394.8	1305.6	319.667	281	739	490	83.3333	59.3333	238.333	193.667	239.667	165.333	112.333	91	277	322.667	0	Spinalcord_RT
Bcl9l		291	408	330.333	347.333	330.167	411.833	1203	1234	807	698.333	498.667	363	628.667	417	958.667	900	1068.67	656.667	656.667	459	1605.33	2070.67	0	muscle_CE
Bclaf1		3636.5	4136.67	4859.33	5871.33	3626.17	4335	3224.4	3056.4	6683	6123.33	5637.33	4449.67	1714.67	1980.67	3067.33	4967.67	2941.33	3496.67	3154	2296	1873.67	2620.67	0	Spleen_CE
Bco2		81	77.3333	40	52.6667	23.3333	29	84.8	87.6	95	84.6667	427.333	335.333	476	639	55	35.6667	59.3333	46.6667	15	8.66667	10	24	0	Liver_CE
Bcor		630.5	777.333	583.667	679	1754.5	2312.67	727.4	666	1741.67	1529.33	1081.67	758.333	407.333	347.333	318	432	496	456.667	498	295.333	1497.67	1877.33	0	Bonemarrow_CE
Bcorl1		251	297	303	318.667	1133.83	1370.17	650.4	693.6	216.667	219	493	374	197.333	144.667	253.667	240.667	277	233	286.667	195	692.667	779.667	0	Bonemarrow_CE
Bcr		2298.5	2692.67	2832	3276.33	1338	1553.5	2969.2	3021.6	726.667	740.333	1846	1692	1053	886	724.333	1128.33	843.667	655.333	832	853.667	316.667	502	0	Hypothalamus_RT
Bcs1l		338	356	290	344	238.833	279.167	523.2	503.2	227.667	205.667	180	147.333	222.333	267	187.333	252.333	225.667	266	647	593.333	1041.33	1152.67	0	muscle_CE
Bdh1		1052	1203.67	592.667	750.667	91.3333	128	1632.2	1561.6	141.667	162.667	1888.67	1770.67	2935.33	3900.33	46.3333	81.3333	22.3333	20.6667	30	33.3333	1859	2221.33	0	Liver_CE
Bdp1		1054.5	1322.67	1683.33	1945	1704.83	1937.83	1185.8	1193.2	2905.67	2752.33	3240	3075	838.667	911.667	1141.33	1622.33	1159.67	1333	1480	1204.67	903.333	1376.67	0	Ileum_RT
Becn1		1466.5	1645.33	1001	1207	3435.17	4161.17	2920	2945.4	1436.33	1482.67	1733.67	1585.67	713.667	881.667	907	1245.33	978.333	916.333	988.667	1040.33	3187	3486.67	0	Bonemarrow_CE
Bend3		107	120.667	148.333	225	166	246.667	231.8	186.6	197.333	225	235.667	166.333	155.333	156	130	195.667	146.333	131.333	252.333	140.333	396.333	481.333	0	muscle_CE
Bend4		245.5	337.667	698.333	741	106.333	118.667	293.6	281.6	336.667	338.667	96.3333	80.3333	35	51	134.667	320	136.333	140	27.3333	32.6667	7.66667	22.3333	0	Hypothalamus_RT
Bet1		310.5	358.667	288.667	321.333	314.833	368.167	614.2	550.2	370	329	710	661.667	978.333	1059.33	468	889	413	862.333	788.333	996.333	601.333	804.667	0	Liver_CE
Bet1l		562.5	627	342.333	401.333	476.167	530.5	662.2	640.4	527.667	511.333	523.667	549.333	364.333	436.333	411	652.333	526.333	611.667	1080	857.667	380.333	531.667	0	BAT_RT
Bfar		648.5	804.333	747.333	859.333	729.667	822.333	1250	1229.4	991	923.667	1167.33	1044	887.667	1090.67	643	941	866.333	994	1803	1521.67	2624.67	3074.33	0	muscle_CE
Bgn		188.5	210.333	111.333	109.333	1501.67	1819.83	1361.8	1021.8	2615.33	2567	978.333	674.667	883.667	828.333	918.667	992.333	1662	451	530.667	582	4521.67	6178.33	0	muscle_CE
Bhlhb9		1198.5	1308.67	1139.33	1434.67	204.5	274.167	1685.8	1565.6	222.333	196	110	71	32.6667	40.6667	263.667	399.333	361.333	256.333	406	140	121	141.667	0	Spinalcord_RT
Bhlhe40		1533	2018	668.333	854.667	420.667	451.833	2306.6	2024.6	633.333	598.667	1344	1032.67	901.667	1378.67	315	1098	503.333	939.333	884	3675.33	6859.33	5923.33	0	muscle_RT
Bhlhe41		522	583	702	838.667	47	64.5	1961.4	1946.8	175.333	155	108.667	61.3333	8.66667	15.6667	185.667	703	219	112.333	267.333	153.667	2982	2436.67	0	muscle_RT
Bicc1		152	179	214.333	261.333	39.1667	54.6667	244	204.2	339.667	296	253	161.667	119.333	128.667	947	814	827.333	380.333	245	173	331.667	458.667	0	VAT_RT
Bicd1		1305.5	1689.33	2915.33	3301	56	74.1667	992.6	1019.8	191.333	198.667	730	549	17.3333	17.6667	477	1259	132.333	124.333	51.3333	44.6667	11.6667	10.6667	0	Hypothalamus_RT
Bicd2		1324.5	1463	1699.67	1973.67	1549.67	1881.67	4381.2	4175.2	1387	1317	649.333	587.667	419	470	1089.67	1442.33	1327.67	1673	1885	2355.67	2540.67	3287	0	Spinalcord_RT
Bid		179	191	233	283.667	1251.5	1362.33	331	283.6	863.667	822.333	824.333	624.667	206.333	267.333	221.667	250.667	237	213.667	73.6667	57.3333	28.3333	53	0	Bonemarrow_CE
Bin1		4262	4728.67	3305.67	4143	754.833	982.833	10015.6	10205.8	2271.67	1988.67	446	242	216.333	254	507.667	592.667	905.333	803.333	999	666	39241	35273.7	0	muscle_RT
Bin3		148	187.667	141.667	160	1538.17	1565	314.6	281.8	770.667	770.667	533.333	493.333	176.333	217.333	206.333	300.667	290	207.667	192.333	178.333	265.667	290.667	0	Bonemarrow_CE
Birc2		897	953.667	1073.67	1225.33	1154	1464	1227.6	1193.2	2136.33	1888.33	1688	1479.67	467.333	533	963.667	1534.33	878.667	1163.67	930.667	761.333	1185.33	1555	0	Spleen_CE
Birc3		35.5	42	43.6667	43	1143.33	1171.67	77.2	72.2	2982	2518.67	1567.67	1023.33	212	253	326.667	426	544.333	633.333	226	234	317	420.667	0	Spleen_CE
Birc5		18.5	13.3333	42.6667	43.3333	4448.17	5637.5	42.2	52.6	803.667	1160	662.333	622.333	29.3333	18.6667	19.6667	27.6667	22.3333	22.6667	8	11	12	12	0	Bonemarrow_CE
Birc6		5623.5	7365.67	8604.33	10015.7	3995.67	4455	5066.4	4849	12992.3	11298	14781.3	12027.7	6496	6798	5409.67	7810.33	6338.33	6345.33	8159.33	7259	3267.67	4319	0	Ileum_RT
Bivm		488	598.333	480	539	132	169.833	874	825.4	160.333	155.333	345.333	287.667	309	338.333	286.333	408.333	240	248.333	381.667	318.333	274.667	415.333	0	Spinalcord_RT
Blcap		1671.5	1926	2542.67	2883	364	348.5	2582.4	2413.6	333.333	361.333	780	582.667	580.667	538.667	1523.67	1073.33	1848.67	955.667	1684	1024.67	1507.33	1708.67	0	Hypothalamus_RT
Blm		110.5	121.667	153.333	189.667	1917.17	2587.83	243.6	209.2	714.667	1010.67	398.667	303.667	111	117	75.3333	122.333	93.3333	97	57	70	79.6667	79.6667	0	Bonemarrow_CE
Blmh		1410	1554	1226.33	1404.33	1243.83	1510.83	1800.6	1789.8	1055.67	1044.67	2042.33	1847.33	777.333	1011.67	665.333	915.667	947	986.333	791	908.333	1709.33	1972	0	Ileum_RT
Blnk		74.5	101	22.3333	25.6667	1065.33	1669.33	61.2	57.2	2779	2372.33	726.667	522	26	32	177.667	264	247.333	343.333	43	40.3333	94.3333	142	0	Spleen_CE
Bloc1s1		31.5	38	20	30.3333	541.167	560.333	926	918	30	23.6667	22.3333	20.6667	19	19.3333	42.3333	60.6667	49.3333	45	58	59	2322	2346.67	0	muscle_CE
Bloc1s3		246	268.667	167	206	317.5	341.167	348	332.2	247	235.333	288.667	313.333	108.667	118	103.333	172.333	147	129	128.667	171.667	231	227.667	0	Spinalcord_RT
Bloc1s4		237.5	248.667	138.333	154	181.333	201.833	200.2	215	187	205.667	143.667	156.333	131	166	117.333	174	155	152.667	241.333	270	217.667	211	0	BAT_CE
Bloc1s5		368.5	428.667	356.667	439.667	309.5	412.167	742.2	717.6	281	281.667	230.333	192	395.667	494.333	364	437.333	358.667	368	640.667	638.667	548	576.667	0	Spinalcord_RT
Bloc1s6		381	443.667	419.333	487.667	612.167	679.333	796.8	732	468.333	431	725	694.333	229	247.333	315.333	404.667	331.333	387.333	515	561.333	929.333	997.333	0	muscle_CE
Blvra		479.5	486.667	232.333	281.667	628.167	764.5	779.8	768.6	613.333	688.333	488.667	439.333	183.667	240.333	371.667	389	337.667	410.667	837	547.667	523.333	641.667	0	BAT_RT
Blvrb		209	207.667	88.6667	122.667	6493.67	9035.33	281.4	287.2	3111	4340.33	338	327	1554.33	2007.33	630.667	718.667	932	902.667	827	531.667	276	444	0	Bonemarrow_CE
Blzf1		435	520.333	324.667	394.667	319	383.333	559	527	352	304	527.333	491	199.667	240.333	367.333	532	348.333	348.667	458.333	394.333	1123	1234	0	muscle_CE
Bmf		161	173	97.6667	107.333	601.667	707.333	230.6	188.4	917	855.667	341	214.667	223.333	244	232.667	496.333	328.333	230	163.667	113.667	219	207.333	0	Spleen_CE
Bmi1		584.5	809.667	555	604.333	371.5	465.167	786	776.6	902.333	795.333	631.667	451.667	331.667	371.667	788.667	1126	626.333	929	797.333	1445.33	1567.67	1726.67	0	muscle_CE
Bmp1		398.5	456.667	422	503	183.5	263.167	1390	1239.4	437	465.667	481	570.333	2541	2632.67	682.667	852.667	1406.33	686.333	452.333	372.333	1632.33	2396.67	0	Liver_CE
Bmp2		66	64.3333	73.6667	76	33.8333	60.1667	112	122.8	340.667	266.667	806	637.667	206	321	88.6667	54	126.667	71	41.3333	30.3333	50.6667	90.6667	0	Ileum_RT
Bmp2k		289.5	384	471.667	528.667	1692.83	2255.17	856.2	806.8	3310.67	3045.33	1450	1088.67	218.333	201.667	729.667	783.667	709.333	740.667	435.333	334	477	746	0	Spleen_CE
Bmp4		42	53.3333	50.3333	63.6667	43.6667	60.1667	142.2	99.4	170.667	176	333.333	249.667	37.6667	53.3333	133.667	183.667	58.6667	34.6667	23	21.6667	229.667	272.667	0	Ileum_RT
Bmp6		194.5	211.333	89.6667	104.667	122.5	152.167	290	215.4	154.667	171	43	47.3333	57.3333	81	139	170.667	157.667	90.6667	323.667	325.333	375	403	0	muscle_CE
Bmp7		214	235.333	247.333	227.333	6.5	9.16667	213.2	206	29	22.3333	241.333	178.333	66	41.3333	53.6667	296	94.3333	31	14.3333	11	24.6667	30	0	VAT_CE
Bmper		197	251	253	288.667	16.3333	19.8333	515.4	492.4	56.6667	55	26.3333	25.3333	8	5	985	436	593	293	295	129	228.333	343.333	0	VAT_RT
Bmpr1a		1482.5	1747.67	1606.67	1799.33	249	222.167	2268.4	2074	615	515.333	3449.67	2979	902.333	970.667	2706.33	3076.33	1984.67	1907.33	1829.67	1495.67	3756	4973.33	0	muscle_CE
Bmpr2		3344.5	4649	5052.67	5623.33	255.167	274.667	1824.4	1801	1201.33	1012.67	2725.33	2137	1462.33	1344	3790.33	4295.33	2529.67	2365	3057	2961.67	1429.33	1810.67	0	Hypothalamus_RT
Bms1		639.5	823	754.667	979	1533	1965	1309.2	1319	1694.33	1601.33	1225.67	1043	644.667	760	629.667	819	812.667	658	777	727.667	2425.67	2771.67	0	muscle_CE
Bmyc		390	424.667	229	302	114.333	126.167	948.8	994.6	151.333	135	47.6667	28.3333	35.6667	46	62.3333	613.333	64	76.3333	48.3333	157.333	202.667	190.667	0	Spinalcord_CE
Bnip1		226	286.667	284.667	342.667	306.5	372	407.4	378.6	468	454	451.667	361.667	302.667	380	194.667	285.333	231.333	273.667	303	361.333	1067.33	1067.33	0	muscle_RT
Bnip2		557.5	658.667	602.333	695.333	2312	2462.83	1003.6	948.6	2016	1906	931.667	810.333	729.333	896.333	1437.33	1469.67	1588.67	1512	1918	1921	3659	4298.33	0	muscle_CE
Bnip3		683.5	761.667	419.333	496.333	65.1667	76	1034	957.4	59	50.6667	88.3333	82.3333	596	702.333	2562.33	1937.33	2196.67	1595	2396	2031.33	8018.33	8966.67	0	muscle_CE
Bnip3l		1335.5	1544	877	1006.33	4534.33	6117.67	2659.8	2486.8	2380.67	2448.33	917.333	728.667	700	720.333	1286	1473.67	960.333	1211	1054.33	1365.33	2493.67	2984.67	0	Bonemarrow_CE
Boc		1189	1112.67	244.333	264.667	16.5	22	698.2	615.2	144	116	264	265.667	10.6667	8.33333	919	902.333	378.667	191	146.667	124	382.333	531.667	0	Brain_RT
Bod1		1120.5	1302.67	831	944	124	139	1720.8	1692.2	219.667	211.333	467.667	445.667	340.667	379	511.333	750.667	517.333	499.667	838.667	869.667	6350.33	6854	0	muscle_CE
Bod1l		2622	3215	3498.67	4375	2257.17	2507.83	3074.2	3038	4288	3928.33	3307.33	2816.33	1091	1236.67	1928.33	2505.33	2129.33	1777.67	1958	1678.67	1811	2412	0	Hypothalamus_RT
Bok		883.5	886	267.333	306.667	19	35.5	379.2	380.6	344	377	225.333	323	192.667	253.333	236.333	226.667	117.667	61	75.3333	51.6667	54	80.3333	0	Brain_CE
Bola1		221.5	236	129	167.667	133	174.667	234.2	243.2	121.333	141.667	123	139.333	214.667	272.667	177.667	302.667	178.667	190.667	290.333	310.667	506.333	519	0	muscle_CE
Bola2		530.5	525	355	443.333	334.333	404.333	650.4	710	812.333	758.667	372.667	351.333	261.667	316.333	256.667	434.333	317.667	388.667	272.667	363.667	396.333	476	0	Spleen_CE
Bola3		262.5	283.333	184.667	262.667	386	503.833	237.2	246.2	316.667	372.333	295	281	419	452.333	396.667	515.333	442.333	1008	1844	2620	2267.67	2581.67	0	BAT_CE
Bop1		1160.5	1314.33	600.333	703.333	905	1087.67	1176.2	1168.4	981.667	1025	864.333	848.333	604.333	673.667	393.333	644	476.333	483.333	643.667	666.333	1807.33	1706.33	0	muscle_RT
Bora		39.5	48	72.6667	88	609	836.667	81	68.8	295	304.333	551	368	42.6667	31	60.6667	110.333	61	56.6667	33.3333	34.6667	38.6667	53.3333	0	Bonemarrow_CE
Bpgm		1432	1490.67	954.333	1172	18777.2	29431.3	2994	2860.2	5968.33	6775.33	1674.33	1778.67	306	348.667	400	590	441.667	465.333	774.333	627.333	6130.67	6861.67	0	Bonemarrow_CE
Bphl		602.5	596	440.667	528	189.833	223.333	855	830.8	192.667	191.667	330.333	297.333	2236	2735.33	522	731.667	542.333	491.667	835.333	1009.67	1037.67	1105	0	Liver_CE
Bpnt1		1090.5	1328.67	1121	1274	171.5	208	1754.2	1656	359.667	328.667	2448.33	2488.33	1522.67	1684	940.333	1336	1007.67	1197.67	1738.33	1901.33	769.333	1279.67	0	Ileum_CE
Bptf		2208	3135	4911.33	5759.33	3387.83	3947	3646	3543.4	6470.67	5179.33	4253.33	3054	1520	1352.67	2297.67	2901.67	2709	2203.33	2181.33	1623	2152.67	2955.33	0	Spleen_CE
Braf		2846	3749.67	3603	4053	1613.83	1681.17	3853.8	3517	1632.67	1441.67	1648.33	1203.67	886.667	766	1485.33	2166	1242	1242.67	1252.33	1054.67	492	735.667	0	Hypothalamus_RT
Brap		1496.5	1800.33	1109.33	1352	1407.67	1703	1705.6	1747.2	1393	1387.33	1340.67	1175.33	3266	3168.67	738.333	1269.33	885	875	2542.33	2194.67	2024.67	2257.67	0	Liver_RT
Brca2		180.5	181	451	542	1640	2183.33	185.8	161.2	1056.33	1222.33	589.333	437	226.333	198	217	282	237.333	215	135.333	111.333	35.3333	47.6667	0	Bonemarrow_CE
Brcc3		591.5	682	602.667	694.667	603	703.833	998.4	957	681	627.333	862.333	642.333	354	442.667	554	769.667	421	615	521.667	561	783.333	968	0	Spinalcord_RT
Brd1		985	1241.67	1331	1543.33	1875.5	2145	1295.4	1309.6	1946	1841.33	2945.67	2567.33	633.333	672	946	1475.33	1127.67	1107	1042.33	1046	1547	2005.33	0	Ileum_RT
Brd2		2606	3092.33	2219	2616.33	5770.83	6829.33	5106.8	4822.8	4242	4268	3700	3260.67	1884.67	2067.33	2486.33	3190	2972	2400.67	3055.33	2112.33	4258.33	5010.33	0	Bonemarrow_CE
Brd3		498.5	608.667	1019.67	1189.33	2579.5	2898	1278.6	1313.6	896.667	916	1008.33	793.333	714	640	544	688.333	559.667	547.667	861	828.333	1528.33	2046.67	0	Bonemarrow_CE
Brd4		444	635.333	589.667	651.667	3897.33	4688.5	2616.6	2684.2	1011	947.333	1457.33	956.667	781	469.667	607.333	578	685	505	415.667	322.333	2276.67	2527.67	0	Bonemarrow_CE
Brd7		633.5	698.333	715.333	919	2011.67	2477.83	1482.2	1432	1300.33	1238.67	1200.33	941	526.667	583.667	600	891	667.333	776	1007.33	879.333	3924.67	4279.67	0	muscle_CE
Brd8		1201	1453	1964.33	2351	2867.83	3553.83	2142.8	2091.6	2554.67	2386	2273.67	1772.67	499	569.333	1082.33	1619.33	1124.67	1243.67	1031.33	834.333	947	1147.67	0	Bonemarrow_CE
Brd9		964.5	1123	1293.67	1539	1176	1294.67	1740.2	1655.6	1390.33	1322.67	1505.67	1581	229.667	272.333	568.333	799.333	683.667	798.667	691.667	631.667	665.667	807.333	0	Spinalcord_RT
Brdt		141	161.667	136	170.333	12.6667	24.1667	307	291.6	26	18.6667	27	16	25.3333	30	70	66.6667	65	59.6667	36.3333	42	72.3333	110.333	0	Spinalcord_RT
Bre		667	790	435	548.667	800.5	909.167	852.6	788.6	666	662.333	761	655.667	424.667	451.667	690.667	861.667	680.333	604.667	801	887	1217.33	1290.67	0	muscle_CE
Brf1		652	769	861.667	986.667	1530.5	1839.17	1247.4	1230.4	1450.33	1506.67	1118.33	840	441	451.333	750	1102.67	909.333	888	731.667	672.333	1022.33	1247.67	0	Bonemarrow_CE
Brf2		298.5	342	176	218.333	132.833	177.667	294.4	279.2	196.333	186.333	139	102.667	112	122.333	112.667	173	154.333	137	172.667	132.667	322	388.333	0	muscle_CE
Bri3		98	135	77	84.3333	133.333	121	179.4	186.6	120	111.667	208.333	187.667	114.667	136.667	162	201.333	185	140	434.667	464.333	527.667	655.667	0	muscle_CE
Bri3bp		2651	3392.67	2597	3031.33	1082.17	1160.17	3576.8	3523.8	849.667	895.667	594.667	416.667	800	827.333	210	717.333	285.333	355	979	924.667	201	308	0	Spinalcord_RT
Brix1		344.5	398	316.333	367	723	912.333	682.4	650.4	517	481	493.667	543	268	311	255.667	347	225.667	323	345	332.333	655	812.333	0	Bonemarrow_CE
Brk1		2246.5	2503	1206.33	1414	2128.83	2339.5	2483.6	2444.6	1538.67	1511.33	1244.33	1290.33	607.667	744	1217	1523.67	1239.67	1298.67	1495	1725.33	1718.67	2256.67	0	Brain_CE
Brms1		332.5	380	158	179.333	629.167	700.667	467.2	436.6	432	441.667	488.667	443.333	183.333	242.667	212.333	318.333	226	199.333	237.333	243.667	736.667	727.333	0	muscle_RT
Brms1l		1149.5	1374.33	967.333	1117	411.167	492.5	2058.4	1896.6	429.333	444.667	285.667	231	98	93	283	420.667	322.333	347.667	348	308.333	818	1047.67	0	Spinalcord_RT
Brox		668.5	834.667	759	905.333	657.667	782.5	1243	1109.2	859.333	811.667	1148.33	906.333	305.333	361	406.333	593.667	403.333	439	544.667	485.333	1114.67	1539	0	muscle_CE
Brpf1		634	800.667	579	691.333	2264.83	2581.5	925.4	913.2	1323.67	1351	1050.67	857	342	346.333	768.333	856.667	763.333	668.667	1029	765.667	771.333	1065	0	Bonemarrow_CE
Brpf3		492.5	528.333	372.667	408.333	5880.67	7770.33	787	760.6	638.333	659	1576	1185.33	434.333	282.667	624	486.333	717	486.333	349	360.667	1043.67	1194.33	0	Bonemarrow_CE
Brwd1		2983	3708	4981	5907	1084	1219.17	3568.4	3503.6	7305.33	6274	4581	3764.33	1679.67	1880	2031	4234.33	2442.67	3020.33	2857.67	2165.33	1689	2124.67	0	Spleen_CE
Brwd3		390.5	499.667	609.667	683.333	534.333	592.5	279.2	267.8	1008.67	805.667	1580	1363	556	523.333	537.667	654.333	411.667	572.667	465.333	371.333	86	151.667	0	Ileum_RT
Bscl2	marker_Ther	1620.5	1830	1591.33	1924.33	898.667	1041.67	2382.4	2441	805	809.333	546	498	741.667	846.333	3207.33	3954	3663.33	3772.33	3999	4318	1020.67	1530.33	0	BAT_CE
Bsdc1		1218.5	1372.67	1331	1604	5406	7533.33	2094.8	1975.8	2251.67	2763.67	1463.67	1314.67	1131.33	1298.33	837.667	1086.33	978	808	1319.67	1065.67	2582	2704.67	0	Bonemarrow_CE
Bsg		8228	9350	4926.33	5831.33	8630	11658.8	12095.8	11846.8	2802.67	3621	7226.33	7342	4719	5132.33	2993.67	4163.67	3284.67	4596.33	6910.33	20719	32457.7	34155.7	0	muscle_CE
Bst2		48.5	51.3333	39	38	921.333	895	128.6	119.4	667.667	672	229	192.333	1454.67	1866	205.333	243	486.667	321	220	229.667	332.333	387	0	Liver_CE
Btaf1		1369.5	1672.33	1338.67	1426.33	2669.33	3294.17	1102.2	1003	3722	3875	2886	2565	1042.67	1151.33	1132.33	1954.67	1199.67	1519.33	1887	1470	759	1173.67	0	Spleen_RT
Btbd1		1119.5	1401.67	889.333	1038.67	437.833	539.667	1330.4	1167	700.333	673	818.667	722.667	337.667	376	758	1066.67	756.333	1038.67	1892.33	2252.33	7470	8930.33	0	muscle_CE
Btbd10		1712.5	2010.33	934.667	1145	658.167	735.333	1452.8	1313.6	515.333	484.667	421	384.333	71.6667	79.6667	364.667	517.667	303.333	406.333	439.333	442.667	411.333	525.667	0	Brain_CE
Btbd11		922	1101.67	1600	1914.33	53.5	52.1667	2041	2026.2	246.667	221.333	95	54.3333	42	40.6667	36.3333	59.3333	127	107.333	36	18	42.3333	59	0	Spinalcord_RT
Btbd19		82	91.6667	92.3333	102.333	109	120.833	116.4	99.4	205.333	214	80	69	46	34	83.3333	123.333	86.6667	85	46	37.6667	69	89	0	Spleen_RT
Btbd2		1394.5	1501.67	1053.67	1199.67	393.5	496.333	2220.2	2180.8	465	463.667	522.667	439.667	318.333	406	443	673.333	564.333	391	743.333	674	2143.33	1964	0	Spinalcord_RT
Btbd3		3252	3859.33	1260.67	1518.33	52.6667	66.6667	3021.2	2956.6	257.667	223.333	437	362.333	119.333	112.667	339.667	469	353.333	291	586	525	813	1111.67	0	Brain_CE
Btbd6		784.5	886.667	812.333	889.333	117.667	160.167	886.6	890.6	427.667	363.667	513	530.667	245.333	262.667	245	391.333	298.667	284.333	505.333	398	1109.67	942.667	0	muscle_RT
Btbd7		686.5	853	1527.33	1618	652.167	767.667	614.8	561.2	2338.33	2148	3365.67	2656.33	898.333	931.333	1645.33	2027.33	1557	1492	1607.67	1379	757.333	937	0	Ileum_RT
Btbd9		1973.5	2319.33	1615.33	1887.33	598.5	651.833	1716.2	1621.4	890.667	854.333	946.333	821.667	448.667	446.333	437.333	784	477.333	396	448	350	758.333	774.333	0	Brain_CE
Btd		356	371	201.333	246.333	280.833	309.667	535.6	464.2	321	332	655.667	712	1249.67	1553	386.667	666.333	726	514.667	877.667	805	387.667	497.333	0	Liver_CE
Btf3		444.5	549.333	360	464.333	1361	1633	883	803	1018.67	981.667	1155	1117.67	378.667	490.667	436.333	750.333	509.667	502.667	605.333	535	6112	6185	0	muscle_CE
Btf3l4		162	193.667	246.333	301	60.6667	73.5	206.4	189.2	143.667	141.333	132.333	106	80.3333	75	143	211.667	120.333	183.333	213.333	302.667	621.333	764.667	0	muscle_CE
Btg1		504	673	325	408.333	2208.5	2497	277.6	322.2	6084.67	5386.67	2074.33	1884	523	657.333	1532	1517.67	1655.33	1672.33	1288.67	847.667	521.333	784.667	0	Spleen_CE
Btg2		310	563	285.667	327.667	6611.17	8695.67	266.6	270	4190.67	4363.33	2123	1999.33	270.333	322.333	894.333	777	847	802.667	1234.67	655.333	953.333	1153.67	0	Bonemarrow_CE
Btk		10.5	16.3333	9.33333	9.66667	2486.17	2868.67	45.8	39.6	1502	1269.67	186.333	93.3333	18	27.6667	75	61	182.333	150.333	24.3333	15.6667	36	62.6667	0	Bonemarrow_CE
Btla		8	8.66667	31.6667	42	814.5	1097.17	35.4	28.2	6611	4809.33	582.333	227.333	10	16	59.3333	66.6667	478	844	23	15	8.66667	7	0	Spleen_CE
Btrc		2505	3228.67	2974	3373.67	1809.33	2629	4056.4	3898	728.333	860	389	277.333	270.667	314.333	401.667	702.667	411	326.333	396.333	332.333	1430.67	1477.33	0	Spinalcord_RT
Bub1b		67.5	73	80.3333	94.3333	3998.67	4857.67	151	160.6	1145	1495.33	1193	1048.67	37.3333	32.3333	90	89	94.3333	69.6667	60.6667	50.3333	24	38.3333	0	Bonemarrow_CE
Bub3		1562.5	1762.67	1281.67	1422	2791.67	3462	2235.8	2126.4	1547.33	1757.67	1279.33	1185	441.667	551	568.667	838.667	685.667	616.333	623.667	623	1682.67	1669.33	0	Bonemarrow_CE
Bud13		156	202.667	214	255.667	339.167	384.5	261.6	258.4	298.333	273.333	245.333	192.333	100.667	102.667	112	156	135	119.667	129	85.6667	462	455	0	muscle_RT
Bud31		421.5	495.667	290.667	334	1183.5	1415.83	718.2	733.6	607.667	641	686	723.667	355	465	412.333	640.667	388	533.667	584	599.333	1244.33	1456.33	0	muscle_CE
Bysl		578	630.333	318	348.667	586.333	757.833	611.2	633	451	538	245.333	225	301.333	356	198.667	305.333	226	308.333	481.333	549	1836	1941.33	0	muscle_CE
Bzw1		3293.5	3825.67	1736	2095	3550.5	4131.5	3504.4	3349.6	3182.33	3069	5029.67	4871	2174.33	2374	2069.67	2712	2085.33	2308.33	2901	2516	2526.67	3604.33	0	Ileum_RT
Bzw2		664.5	787	463.333	591.667	809.333	1015.5	477.2	489.2	1039.67	1150.67	1289.33	1149.67	150	177.333	450.333	621.667	493.667	504.667	857	710.333	4953.67	5234.33	0	muscle_CE
C130050O18Rik		10.5	12.6667	44.3333	46	242.167	198.5	7.8	7	133.667	133.333	47.6667	39	12.6667	17.3333	29.6667	29	40.3333	34	26.6667	20	14.6667	14	0	Bonemarrow_RT
C130074G19Rik		640.5	741.333	205.667	228.333	54.3333	80	613	539.6	199.333	167	1897.33	2083	3036	3446.67	1883.67	2135	1981.67	2278	1393.33	2553.67	986	1353	0	Liver_CE
C1d		720.5	772.667	686.333	808.333	608.5	694.167	980.8	900.2	460.667	436.333	727	668.667	476.667	605	692.333	1022.33	593.667	826	615.333	707.667	1335	1484	0	muscle_CE
C1galt1		434.5	549	455.333	527.667	1291.83	1678.17	284.4	278.6	2622	2369.33	4515.67	4188.67	1386.33	1550.67	1269	1725.67	1078.67	1338	1090.33	1239	400.333	580.333	0	Ileum_RT
C1galt1c1		521.5	540	359.667	411	795	744.833	635.8	590.2	267.333	250.667	1052.33	1080.33	317.333	412.333	293.667	526	228.333	327.667	297.667	269.333	413	525.333	0	Ileum_CE
C1qa		1187.5	1180.33	516	555.667	1317.67	1861.33	1278.8	1160	4284.33	4366	782	592.667	592.667	839.333	1145.33	1416	2499	1343.67	556.667	513.667	1166.33	2032	0	Spleen_RT
C1qb		861.5	879.667	377.333	448	1361.33	1884	1390.2	1343	3040	3238	564.333	477.667	468.333	627	1032.33	1022	1951.33	1055.33	407.667	372.667	1063.33	1836	0	Spleen_RT
C1qbp		746	822	414.667	540.667	1341.67	1771	1543.4	1620.6	759	832.333	835	778.667	797.333	841.667	388.667	560.667	484	537.333	1235.67	1213	3266.67	3512.67	0	muscle_CE
C1qc		861	955.333	388	479	1304.5	1877.5	1145	1043.4	4010.33	4455.67	646.667	523.333	587.333	804.333	1065.33	1152	2079.67	1283.33	484.667	464.667	989	1744.67	0	Spleen_RT
C1qtnf1		60	55	33	36.3333	75	118.833	245	222	189.333	186.333	119.667	85.3333	138.333	159.667	423.667	299.333	978.667	322.667	196.667	172.667	1081	1654.33	0	muscle_CE
C1qtnf6		18	22.3333	15.3333	19.6667	67	88	103.6	73.4	118	106.333	62.6667	49.3333	11.3333	13.3333	92.3333	76	213.333	107.667	40.6667	46.3333	396.667	429.333	0	muscle_CE
C1ra		15	21.6667	10.3333	8.33333	135.167	167	27.4	26.8	469	458	204.333	150.667	2767	3541	513.667	672.333	1088.67	451.667	223.667	172.333	799.333	1324	0	Liver_CE
C1rl		9	11.3333	6.33333	8	409.333	390.5	20	13.6	59	71.3333	43.3333	38.3333	2267.67	2899	135.333	195.333	240.667	279.667	452.667	807.667	47.3333	122.667	0	Liver_CE
C2		61	72.6667	79.6667	90	126.833	189.833	75	63	792.667	797.333	1810	1197.67	3119	3357	3792.33	2779.33	3410.33	981.667	280.333	176.667	214.333	349	0	VAT_RT
C2cd2		338.5	413.667	395.333	482.667	393.5	481.5	1106.4	1032.4	465.667	533.333	417	343.667	3379	3773.67	471.333	524.333	650	482	1031.67	868.667	14399.3	15428.3	0	muscle_CE
C2cd2l		2354	2657.33	1328	1563.33	880.167	1062.5	1774.8	1833.8	408.667	485	1875.67	1784.33	600	594.333	462.333	802	776.333	448.667	497.667	424	1161.67	1268.33	0	Brain_CE
C2cd3		597	784.333	1132.33	1223	1908.17	2403.5	1127.4	1117.2	1802.33	1708	1015.67	791.333	406	359.333	599	741.333	727	563	674.667	496.333	649	755.667	0	Bonemarrow_CE
C2cd5		1637.5	1807	2164.33	2481	2308.17	2730.67	1748.2	1636.2	1388.67	1374.67	1830.67	1351.33	211	198	614	1019	580.333	528.667	441.333	380	583.667	784.667	0	Bonemarrow_CE
C3	lipid_GO	68	89	148.667	98.3333	19727.7	16742.3	3276.8	2721	15377.7	14542	2570.33	1827	148961	173589	12162.7	18648.7	25836.3	11185.7	23816	19520.7	7231.33	12872	0	Liver_CE
C330007P06Rik		521.5	626.333	480.333	587.667	425	503.833	768.2	658.4	514	539.667	562	440.333	345.333	410.667	977.333	1238	854.667	1193.67	1306.67	1461.67	580.333	886	0	BAT_CE
C330018D20Rik		232	224.333	190.667	229.333	267.333	339.167	333.4	301	307.333	277.667	445	455	164.667	218.333	349	410	377.333	543	737	807	573.333	635.333	0	BAT_CE
C330027C09Rik		58.5	54	41.3333	48.3333	2168.67	2623.83	81.6	77.2	533.667	703	707.667	707	55.3333	37.6667	55.3333	74	53	55	22.6667	25	63.3333	66.3333	0	Bonemarrow_CE
C3ar1		59.5	57.3333	37.3333	40.3333	66.6667	68.1667	71.6	61.8	33.3333	26.6667	212.333	156	55.3333	68.3333	308.333	265	453	276	101	111.333	90	190	0	SAT_RT
C4b		529	478.333	665.667	727.667	328.5	357.5	2170.4	1925	3010	3131	768	457.333	21125.3	24207.3	6994.33	4349	17080	4654.33	896.667	526.667	1583.67	2321	0	Liver_CE
C530008M17Rik		687	894.333	2023.67	2440.33	1250	1694.83	2866.8	2866	382.333	610.667	3959.33	2861	10	9.33333	71.3333	58.6667	29.3333	47	22.3333	12.6667	148.667	158.333	0	Ileum_RT
C5ar1		16	20.6667	7	9	2255.67	2031.5	24	26.2	29.3333	67.3333	52	45.3333	11	11	140.333	101	253	102.333	45.6667	61.3333	99.3333	158	0	Bonemarrow_RT
C5ar2		10	14	12	13.6667	461.667	469.667	29	29.4	123.667	141	25.6667	20	39.6667	58.6667	32	28.3333	65.6667	48.6667	23	27.6667	18	32.3333	0	Bonemarrow_CE
C77080		195.5	267	205.333	221.667	20	34.8333	478.2	422.2	80.3333	81.6667	4199.67	3035.67	1002.67	865	239.667	323.333	74.6667	64	131	131.667	128.333	176.667	0	Ileum_RT
C87436		583.5	711.667	491.667	611.333	402.5	465	711.4	656.6	584	598.333	325	296.667	297.667	322	261.333	409.667	332.667	307.667	350.333	379.667	423	509.333	0	Brain_CE
C8g		26.5	25.3333	45	58.3333	9.66667	12.1667	38.6	33.4	49	52.6667	36	30.3333	5002.67	6067.67	53.3333	99.3333	48	69.6667	197.667	140	93.3333	83	0	Liver_CE
Caap1		135	173	171.667	196	215.667	255.333	172.4	148.8	261	231	297.333	217	81	93.6667	158	257.333	122	154.333	121.667	104	56.6667	82.6667	0	Ileum_RT
Cab39		4433	5450.67	3703.33	4303	3225.5	3554.17	7281.4	7083	3533	3356.67	9029	8542	1447.33	1638.67	2008.33	3378.33	2054.67	2416.33	5311	4139.33	9104.33	10731	0	muscle_CE
Cab39l		718	828	656	784	910.333	1076.83	1506.2	1455.6	986	885.667	884.667	748	1160.33	1320	941	1326.67	867.667	1096.33	1316	1412.33	1312.33	1465.67	0	Spinalcord_RT
Cabin1		1477	1684.33	2263.67	2672.67	3367	4114.17	2453	2324.2	2499	2613.33	2415	1810.33	624.333	575.667	1062.33	1327.33	1233	1038.67	1391.33	924.333	962.333	1093.33	0	Bonemarrow_CE
Cables1		707	736.667	768.667	960.333	64.5	64.6667	611.4	607.4	78.6667	90.3333	763.333	883	42.6667	40.3333	434.333	517	547.333	731.667	1297.67	2325.33	81.3333	215.667	0	BAT_CE
Cables2		343	417.333	481	537.333	657.833	751.5	1537.6	1467.6	953.333	816	686.667	594.667	458	449.333	253.667	583.667	328.667	426.333	427.333	352.667	753.333	841.667	0	Spinalcord_RT
Cacfd1		495.5	591	554.667	617	296	328.833	1217.2	1147.2	373	331	467.333	419.667	404.667	379.667	257.667	571	278	254.667	314	312	1361.67	1799.67	0	muscle_CE
Cachd1		557	672	801.333	962	198.833	264.333	1164.8	1185.8	132.333	125.333	829.667	709.333	37	37.3333	2121	1414.67	1084.67	442	126.667	104.333	283.333	335.667	0	VAT_RT
Cacna1a		2841	3274.67	2596	2892	23.1667	21.5	3972.2	3806.2	86	82.6667	498.333	371	20	17.3333	222.667	230.667	203.667	127.333	235.333	274	126.667	212.667	0	Spinalcord_RT
Cacna1c		2202	2640.33	2967.33	3362.33	13.3333	17.6667	1301.6	1245.4	189.333	153.667	580.667	449	15.6667	12.6667	492.667	361.333	246.667	163.333	202	131	91.3333	135.667	0	Hypothalamus_RT
Cacna1d		600	745.667	1463	1641	100.167	80.8333	1190.2	1123	187.667	173	299	183	77	69.6667	231.667	634.667	75.3333	63	26	19.6667	10.6667	13	0	Hypothalamus_RT
Cacna2d1		3965	5147	6049.67	6578.67	49.8333	58.3333	2429.4	2159.2	186	139	544.667	378	32	33	527.333	794.333	546.333	500.667	880	535	18665	24120.3	0	muscle_CE
Cacna2d4		53.5	71.3333	85	114.667	19.3333	27.8333	91.4	83.2	89	80	16.3333	10	11.6667	15	25.3333	24.6667	40.6667	50.3333	22	17.3333	498.333	474	0	muscle_RT
Cacnb1		1146	1450	1309	1410	60.1667	70.6667	1091.2	1055.2	134.333	133.333	61	47	11.6667	12	63	135.667	110.667	100.333	316.667	187.333	10273.7	9774.33	0	muscle_RT
Cacnb2		992.5	1224.67	1636	1917.67	25.1667	20.3333	1361.8	1252.8	67.6667	58	289	197	22	14.3333	88.6667	145.333	22.3333	23.3333	21.3333	12	15.3333	14	0	Hypothalamus_RT
Cacnb3		2231.5	2660.67	1137.33	1283.67	10.8333	14.3333	1208.4	1142.8	260.333	222.667	753.333	684.333	10.3333	7	95.3333	138.667	168.333	203.667	29	38.6667	77	135.333	0	Brain_CE
Cactin		467.5	500.667	480.667	583	1357.83	1736.5	779.6	818.8	854.667	894.333	561.667	501.333	240.333	301.333	244	356.333	342	326	409.667	426	698.667	752.667	0	Bonemarrow_CE
Cacul1		1100	1388	1706.67	1924	954.333	1020.67	1687.4	1589.6	1276.67	1184.67	1789.67	1445.67	1481	1480.33	695.667	1082	738.667	869	1023	1214.33	2087.33	2343.33	0	muscle_CE
Cacybp		1314.5	1486.67	1423	1594.67	1106.83	1402	1961.8	1982.8	1157.67	1071.67	823	1027	375.667	478	570.667	1048.33	609	1331	1090.33	1424.67	2049	2589	0	muscle_CE
Cad		484.5	513.667	691.333	806.333	1925	2517.67	947.4	917.4	1587.67	1844.33	1220.33	1050	538.333	624.667	601.333	4314.67	680	545.333	1391.67	1227.67	762.667	1144.33	0	VAT_CE
Cadm1		3709	4372.67	4636.33	5362	135.5	163.833	3146.8	2888.4	1237	1340.33	199	129.667	584	769.667	241.333	327.667	108	85.6667	102	82	414.333	407.667	0	Hypothalamus_RT
Cadm3		6075.5	7743.67	5160.33	6142.67	25.3333	37.3333	10911.4	10363.2	338.333	322.333	95	60.3333	111.667	123.667	133.667	175	686.333	280	169	123.667	583.333	806.333	0	Spinalcord_RT
Cadm4		3988.5	4437.67	2716.67	3320.33	5.16667	9.66667	9765.4	9710.8	379.667	333.667	46	28.3333	160.667	185.667	53.6667	80.3333	72.3333	43	79.6667	49	134	131.667	0	Spinalcord_RT
Cadps2		3893	4670.67	2139	2656	6.5	9.5	895.4	841.6	164.667	138.333	1046.67	930.333	455	550.667	196.667	434.333	288.333	263.667	114.333	126	16.6667	33	0	Brain_CE
Cage1		79.5	82.6667	217	274	34.3333	37	111.2	97	61	50.6667	46	35.3333	17.3333	22	62.6667	148	36	45.6667	48.3333	31.3333	11	12.6667	0	Hypothalamus_RT
Calcoco1		889	1060	697	801	1096.67	1402	1857.2	1881.4	587.333	571.667	381.333	264.333	460.333	440.667	761.333	906.333	913.333	639.333	1104.33	859.333	5381.67	5620	0	muscle_CE
Calcrl		177	196.333	240.667	246.333	523.5	554.5	403.2	364.6	1585	1275.67	656.667	447.333	329	475.333	813	850.667	599	780.667	444	385	338.333	653	0	Spleen_CE
Cald1		348	451	463.667	549	831.833	1094.67	1034.4	971	1956.33	1730	1464.67	1064.33	3633.33	3591.33	2335.67	1542	1552	1344.33	680.333	734	1224	1510.33	0	Liver_RT
Calhm2		94	127	81	79.3333	347	372.833	78.8	59.2	1080	1013.67	195.333	124	43.3333	55.3333	112	151.667	255.667	231.333	86.6667	80	101.667	176	0	Spleen_CE
Calm1		72942	82552	29769.3	36267.3	8958.5	9479.83	66881.4	63972.6	11955.7	10772.3	50776.3	53026.3	4208	4617	7016	9464.33	6429.33	7699.33	6126	10026.7	31491	33368	0	Brain_CE
Calm2		14981	16707	6411	7598.33	3153	3727.17	12875.2	12129.8	1723.33	1698	5198.33	4885.33	832	1039.33	1446.67	2268	1155.33	1684.67	1217.33	1398.33	6768	8405.67	0	Brain_CE
Calm3		30455	33775.3	13853.3	16701	5584.5	6457.5	34274.6	33743.4	3947.33	4296.33	11471.7	11351.3	850.667	1021.33	2522.33	2595.67	2538	2033.67	2024.67	2299.33	19080	18449.3	0	Spinalcord_RT
Calml4		41.5	54.3333	49	57.3333	8.66667	9.66667	50.8	40.2	57	59	3957.67	3980.67	11	22.6667	227.333	202.333	56.6667	63.3333	15.3333	11.6667	53.3333	68	0	Ileum_CE
Calr		8864.5	10595.7	5425	6351	12677.2	14778.8	9533.4	9413.2	9313.33	8987.67	16295.3	14378.7	14981.3	18527.7	4473.33	13942	6089.33	3797	4824	5044.33	9185.67	10070.7	0	Liver_CE
Calr3		43	49	46.3333	57	5.5	9.66667	119.8	125.6	26.6667	14.3333	11	13	53	55.6667	76	119.333	87.3333	102.333	219.667	173.333	181.667	211.333	0	BAT_RT
Calu		2084.5	2255	1516	1863	2228	2664	3592.2	3297	2553.67	2469.33	3991.67	3737	2053.33	2549.33	3527.67	4529.33	3963.67	3418	5417.33	4606.67	6090.33	7652.33	0	muscle_CE
Camk1		1417	1613.67	1406.33	1670	626.667	624	1333.8	1399.2	494.667	504	395.333	315	212.667	301.667	1194.33	1025.33	1151.33	833.667	800.333	699.333	1771.33	1863.67	0	muscle_CE
Camk1d		1529	1919.33	1007	1133	1176.33	1269.5	5426.8	5182	1229.67	1064.67	2932	2029.67	1975.33	1926.33	193.667	149.667	428	266.667	78.3333	57.3333	185.333	291.667	0	Spinalcord_RT
Camk2b		13345	16182.3	8048.67	9352	79.3333	90.3333	11640.8	11631	113.333	110.333	256.333	222.333	129.333	120	97.6667	1208	74.3333	91.3333	362.667	760.667	11037	10444.7	0	Brain_CE
Camk2d		2510	2960	3228	3823.67	701.833	891.333	4011.4	3784.6	3524	2998.33	9061	7222.33	254.667	291	2854.67	2941.33	2452	2261.67	1798	1301.33	2392.67	2855.67	0	Ileum_RT
Camk2g		4895.5	5897.67	4065.33	4785.67	1057.83	971.833	14390.2	14124.8	556.333	530.333	447.333	339	246.333	271.667	609	812.333	628	535.333	633.667	526	11639.3	11486.3	0	Spinalcord_RT
Camk2n1		10902.5	12257	2459.33	3037.33	30.6667	38.3333	8272.2	8295.6	329.333	336.667	1363.33	1218.67	610	678.333	288.667	293.333	216	151.333	93.3333	85.3333	308.667	480.333	0	Brain_CE
Camk2n2		1045	1201.33	755.667	990.333	8.83333	9.16667	4040.2	3988.8	13	14.3333	17.6667	20	20.3333	19.6667	26.6667	18	33.6667	24	25.3333	33.6667	18.3333	23.6667	0	Spinalcord_RT
Camkk1		2476.5	2856	1447	1726.33	183.833	159.5	5074.2	5183	109	116	131.667	106	9.33333	16.6667	78.6667	156	73	47.6667	17.6667	18.3333	46.3333	124.333	0	Spinalcord_CE
Camkk2		3086.5	3841.67	1201.33	1305.33	2037	2263.83	2139.8	2225.6	1136.67	1168.67	388.333	301	385.667	352.667	753	746.333	1040.67	1009.67	864	1142	322.333	461.667	0	Brain_CE
Camkmt		105	122.333	112	126.333	51.8333	52.8333	292.6	277.4	84	79.3333	118.333	98.6667	15.3333	18.6667	58.6667	63	77	50.3333	67.6667	50.6667	18.6667	46	0	Spinalcord_RT
Caml		564	665.333	528.667	614	280.333	345.333	709.2	677.2	357.667	372.667	425	412.333	306.667	331.667	356.333	557.667	336.667	368	355.333	281.333	289.333	399.333	0	Spinalcord_RT
Camsap1		2659.5	3117.33	2271	2621.33	460.667	633.167	2157	2135.4	683.333	680.333	533	479.667	274.333	281	341.667	573.333	373.667	374.333	422	308	3078	3083.67	0	Brain_CE
Camsap2		4330.5	5375.33	4916.33	5857.67	1930.67	2581	4461.8	4292.4	1905	2248.67	607.333	504.333	755.667	718.667	1435.67	1653	1632.67	1571	3529.33	2380.33	584	993.333	0	Hypothalamus_RT
Camsap3		290.5	320.333	438.667	533	23.5	34	926.4	936	45.6667	49	1741.33	1575.33	213.667	230.333	113.333	260.333	81.3333	77.6667	276.333	149.333	26.3333	51.3333	0	Ileum_RT
Camta1		3984.5	4841.33	5396.33	6594.67	100.833	115.167	11945.2	11884.4	230.667	227.333	188.333	137.667	68.6667	58.6667	202.667	294.667	181.333	203	272.333	203.667	744	954	0	Spinalcord_RT
Camta2		1522.5	1913	915.667	1057.33	1286.83	1378.83	5837.8	5940.8	640.333	552.333	1558.67	1241.33	409	282	517	459	619.333	480	696	457.667	4939.67	4858.67	0	Spinalcord_CE
Cand1		5245.5	6595.67	5664.67	6493.33	1920.5	2442	6303.2	6109.6	2490.67	2495.33	3399.33	2823	1845.33	2149	1427.67	2068	1663.33	1422.33	2045.67	1755.67	721.667	1107	0	Brain_CE
Cand2		91.5	114.333	225.333	294.333	76.3333	95.8333	166.2	149	180.333	161	185.667	149	12	14	84.6667	142.333	110.333	57.3333	156.333	84.6667	9502.67	7915.67	0	muscle_RT
Cant1		792.5	879	847.667	1020.33	1068.17	1212.67	1723.8	1654.4	963.667	903.333	3468.67	2807	558.333	527	849	969.667	1155.67	640.667	693	480	904.667	1055.33	0	Ileum_RT
Canx		12063.5	14051.7	11232	13664.7	7781.83	9609.83	13812.4	13093	8913.33	8958.33	24469.7	22409.3	10912.3	12642.7	6419.33	11021.3	6371.67	5552.33	6774.33	8481.67	4165.67	5592	0	Ileum_RT
Cap1		4123	4878.33	1965.67	2342.67	13578.7	13644.2	4915.2	4528.6	6799.33	6388	6963.67	6349.67	1118.67	1327.33	1647	2104	2033.33	1574.33	1494	1429	1196.67	1635.33	0	Bonemarrow_CE
Capg		68.5	53	50.6667	47.3333	2866.5	2675.83	200	199.6	2122.33	1877.67	600.333	510.667	29.3333	49	449.333	1365	654.667	425.333	130.667	94	759	960.333	0	Bonemarrow_RT
Capn1		501	583.667	216.333	258.667	4775.67	5116.33	1555	1473.6	1675.33	1829.67	5958.33	6191.67	349	441	551.667	1351.33	712.333	565.667	709	537.333	6753.67	6832.67	0	muscle_CE
Capn10		589.5	668.667	617.333	705.667	300.833	368.833	751.8	786.8	283.667	303.333	688	721.333	334.333	483.667	233.667	800.667	216.667	225	253.333	236.667	266.667	336.667	0	VAT_CE
Capn2		1840	2059	1996	2357.67	1621.17	1732.33	4696.8	4629.6	1404.67	1335	1302.33	1380.67	1119.33	1402.33	3814.67	3969.67	4657.67	4072.33	4936.67	4665.33	4326.67	4785	0	BAT_RT
Capn3		119	123.667	89.3333	105.667	134.5	173.5	164.4	148.2	81	95.3333	67	50.6667	40.6667	60.6667	32.3333	222	63.3333	53	250	110.667	10825.7	10437.3	0	muscle_RT
Capn5		656	767.667	789.667	911	1264.67	1942.83	1416.4	1310	443.667	483	984.333	731.333	66.3333	84.6667	225.333	1514.67	181	100	67.3333	52	180.333	230.333	0	Bonemarrow_CE
Capn7		1164	1335.33	1421.33	1595	1435.5	1657.67	1827.4	1710	1951	1783.33	2208.67	2049.33	917.333	1044.33	1145.33	2023.67	1187.33	1436.67	1358	1269.67	3052.33	3330	0	muscle_CE
Capns1		2363	2600.33	1925.67	2316.33	4061.5	4366.5	7079.8	6351.4	1898.67	1960.33	2866.33	2529.33	1178	1377.67	2224.67	3211.67	2638.33	2624.33	4755.33	5126.33	8715	8874.33	0	muscle_CE
Caprin1		5497	6669	5140.67	5992	6798.83	8453	7123.2	6689.6	6607.33	6618.33	10237.7	9197	7313.67	7176.67	4954.33	6407.67	5278.67	5318.33	7447	6685.33	3191	4293	0	Ileum_RT
Caprin2		109	113	649.333	769.333	149.167	196.333	626.4	566.2	218.667	234.333	210	131.667	41.6667	59.6667	270.667	533.333	257	209.667	251.333	192	255.667	227.333	0	Hypothalamus_RT
Capza1		140.5	178	200	253	939	966.667	323	310.6	739	696	811.667	739.667	107	114.333	228.667	289	255.333	364.333	324.333	340	727	1034	0	muscle_CE
Capza2		3443.5	3867.33	2625	3007.33	3736.17	3910.5	4969.8	4701	4055	3680.67	5644	5285.33	1215.33	1374.33	2630.33	2952.33	2442.67	3247.33	2913.33	3294.67	12006	14751	0	muscle_CE
Capzb		2377.5	2768.67	1285.33	1580	6453.33	7002.33	5590.4	5383.2	2973	2867	4396	3877	877.667	942.333	1186.67	1565	1336.67	1181.67	1417.67	1339.33	16937.7	17521.7	0	muscle_CE
Car13		65.5	70.3333	52	55	98.1667	121.833	237.2	183.6	82.6667	118.333	1178.33	1068	11.6667	13.6667	346	354.333	388	634.333	1150.67	1135	29.6667	87.6667	0	Ileum_RT
Car15		55.5	72.6667	83	79.3333	53.8333	56.3333	75.2	61.4	74.6667	68.6667	70.3333	61	12	19.6667	16.3333	26.6667	22	31.3333	43	35	25	52	0	Hypothalamus_CE
Car2		3924.5	4292.33	2263.67	2659.33	40152.2	60361.3	12759.4	12425.2	12427	18354	90.6667	78	103.667	110	121	397	55.6667	93.3333	342.333	369	367	506.333	0	Bonemarrow_CE
Car3		18.5	34	46.3333	23.3333	35.3333	47	187.4	111	527.667	353	1052.33	2041.33	48608.7	70796	283819	247112	260991	163515	114182	22521	53933	82527.7	0	VAT_RT
Car5b		74	87.6667	76.3333	84	11.5	18	239	192.4	77.6667	56.6667	77.3333	132.333	90.6667	77	5918	8221.33	4894.67	4758	1573.67	1777	177	680.667	0	VAT_CE
Car7		317.5	363.333	41.3333	40.3333	9	11	354.8	358	33.6667	33.6667	17.6667	12.6667	26	20.3333	40.3333	184	41.6667	40.3333	71.3333	96	81	99	0	Brain_CE
Card10		94.5	86.6667	65	99	816.333	734.833	861.6	822.4	92.6667	80	390	386	142.667	151.667	525	333.333	647	329	295.667	333.667	714.333	888.667	0	muscle_CE
Card6		19	20.3333	19.3333	20.6667	669.833	766.333	95.4	78.6	402.333	332.333	206	132	199.667	134.667	90.3333	92.6667	123	111.333	49	57.6667	160	194.667	0	Bonemarrow_CE
Card9		47	56	58.6667	68.3333	1405.5	1292.33	82.6	83.2	117	150	593	773.667	14	13.6667	59	132.333	84.6667	84	40.6667	28.3333	28.6667	51.6667	0	Bonemarrow_RT
Carf		518	593.667	704.667	889	70.5	84.6667	287.8	266.4	332	263	339	222.667	145.667	168.667	362	537	334.333	384	492	317	110.333	150.667	0	Hypothalamus_RT
Carhsp1		887.5	800.667	761.333	952	5499.83	7365	3517.8	3037.6	1474.67	1914.67	1109	999	1387.67	1524.67	1954.33	1604	2436.33	2132.33	4422.67	3319.67	687.667	1290	0	Bonemarrow_CE
Carm1		508	573	588.667	693.667	1847.67	2589.17	1782	1624.4	624.333	657.667	641	510.333	284.333	269.333	421	494.333	463.667	390.333	559.333	439.667	5098	5675.67	0	muscle_CE
Carns1		180	169	201	256	532.833	549	2845	2647	542.667	580.333	97.3333	52	18.6667	24	83	88	139.667	182.333	64	70.6667	1744	2091.33	0	Spinalcord_RT
Cars		911	1000.33	878.667	1054.33	1174.67	1577	1414.2	1446.2	744.667	796.667	766	684	639	780.667	361	557.333	409.333	405.667	429.333	415.667	2484	2506.67	0	muscle_CE
Cars2		227.5	242	304.333	342.667	384.667	475.167	361.2	349.6	535.333	542.333	508.333	456.333	287.333	286.667	323	473.333	372	530.333	641.667	1257	863.667	989.667	0	BAT_CE
Casc3		529.5	669.333	899.333	1081	2056	2342.67	2059.6	2010	981.667	994.667	922.333	761.333	311	286.667	456	506.667	509.667	465.667	515.667	399.333	1291.33	1615	0	Bonemarrow_CE
Casc4		1444	1796	2325	2851	118.667	146.167	2784.2	2523.8	269	303.667	490	352	85.3333	104	193.667	569	110.333	94.3333	78.6667	64	358.333	369	0	Hypothalamus_RT
Casd1		1492	1790.67	1741	1954.67	920.333	1040.67	1660	1460.2	997.333	882.667	798.667	673.667	765.667	832	584.333	968.667	605	670	673.333	583.333	1159.67	1343.33	0	Hypothalamus_RT
Cask		2238	2748.67	2680.33	3104.67	469.5	443.333	2239.8	2069.4	419	414	2817	2463.33	563.333	646.333	943.667	963.333	889.333	678.333	909	857	588.333	756.667	0	Hypothalamus_RT
Caskin2		340.5	395.333	497	554	360.167	448.833	1303.2	1487.6	406	416	1929.33	1815.33	291.667	281.333	640	1166.67	670.667	558.667	1076.33	867.667	1437.33	1776	0	Ileum_RT
Casp1		45.5	43	14	17.6667	682.5	660.5	74.6	78.2	758.667	711	4303.33	4380	27.6667	47.6667	163.667	166.333	257.333	383.333	47	42	48.6667	86.3333	0	Ileum_CE
Casp12		37	37.3333	27.6667	29	18.8333	26.6667	131	104.8	166.333	163.333	320	239	35.3333	50	503	527	720.333	597.667	131.333	79.6667	778	981	0	muscle_CE
Casp2		215	269.667	370.667	437.667	2131.17	2697.17	372.2	359.8	1589.33	1548.67	1435.67	1074.33	151.333	138	317	590	335	416.333	223	243	226	291	0	Bonemarrow_CE
Casp3		203.5	209	188.333	229.333	1298	1544	184.2	161.2	988.667	1271.33	1183.33	1044.33	359.667	499	317	584.333	413	873.333	365	587.667	39.3333	109.667	0	Bonemarrow_CE
Casp6		39	40.3333	54.6667	61.6667	318.333	416.333	78	73.8	255.667	276.333	263.667	210	177	238.667	150	196.667	154	127.667	168	143.333	82	113	0	Bonemarrow_CE
Casp7		62.5	70	65	84.3333	708.5	741.833	107.6	100.6	388.333	419	5587.33	5043	463.667	529	251.667	339	311.333	221	215.667	111.667	204.333	263.333	0	Ileum_RT
Casp8		43.5	49.3333	47.3333	45.3333	1292.17	1372.83	98.8	83.8	1514.33	1403	4483.33	4514.67	523.667	586.667	690.333	836.333	996.333	916.333	434.333	400	194.333	322.667	0	Ileum_CE
Casp8ap2		636.5	732.333	667	724	1595.17	1919.67	528.4	519	1681	1715	1294.33	1216.67	275.333	322	561.333	758.667	594	663	554.667	488.667	293.333	447.667	0	Bonemarrow_CE
Casp9		361.5	421	282.667	331	1062.33	1188.67	849.4	800.6	626.333	623	591.333	498	433.333	470.667	373.667	527.667	385	322	307.333	348	247.667	300.667	0	Bonemarrow_CE
Cast		335	398.333	323.333	402.667	3369.17	3863.33	1128.8	1086	2420.67	2452.67	8277.33	7239.33	1142.67	1292	3248.67	3102.67	3503.33	2409.33	2337	2237.67	4391	5051	0	Ileum_RT
Casz1		163.5	170.333	211	240.333	271.667	295.667	290.6	293.4	259.333	224.667	3698.33	2845	26	21.6667	181	209	177.667	156	258	157	2729.33	2787.33	0	Ileum_RT
Cat		1145.5	1228.33	830.667	1020.33	5125.5	6983.83	3523.8	3244.8	3635.33	4066.33	2952	2658.67	61461	68185.3	9926.33	11703	12991.3	13298.7	16747.3	16682.3	5404.33	7456.33	0	Liver_CE
Catsper2		41.5	47	89	134.667	12.5	17.1667	176.2	159.2	52.6667	40.6667	52.3333	50	60.3333	58.3333	97.3333	181.667	84.3333	121.333	144.333	112	102.333	174.667	0	VAT_CE
Cav1	marker_Ther	267	353.333	271	290.667	23.1667	25.5	873	785.2	777.667	651.333	1247.67	1249.67	155.333	96.6667	45889.7	28697.7	22794.3	16675	20142	12488.7	4344.67	5683	0	VAT_RT
Cav2		526.5	645.333	334.667	375.667	63.8333	68.6667	805.4	644.2	262	215.333	187	159	58.3333	65	12938	7242.33	5599	5628.67	3294	2330	614.667	960	0	VAT_RT
Cbfa2t2		1009.5	1231	1061.33	1212	503.5	621.667	1737.2	1626.4	543	483.667	692.333	533.667	358	326.667	374.667	534.333	411	398.667	476.667	523.667	978.333	1173	0	Spinalcord_RT
Cbfa2t3		138	203.667	62.3333	65	1571.5	1557.5	210	224.8	575.667	505	323.667	251.333	54	47.6667	201	139	257	211.333	289	360.333	1447.67	1758.33	0	muscle_CE
Cbfb		471	599	551.667	664.667	1841.17	1942.17	744.4	704.4	2145.67	1855.67	1229.67	1036	320	344	519.667	998.667	605	673.333	522	404.667	4193	4608	0	muscle_CE
Cbl		996.5	1340.33	1674.33	1757.33	2428.5	2384.17	930.6	980.2	3016.67	2572.33	2645.33	1987.67	400.333	315.667	1197.33	1265.67	1433	1090.33	782.333	636.667	263.333	399.333	0	Spleen_CE
Cblb		302	396.333	420.333	501	803.667	1033.83	667.6	590.2	1644.33	1310.33	612.667	390.667	195	151	660.333	589	944	772.667	627.667	441	752.333	1039.33	0	Spleen_CE
Cbll1		192	264.667	168.667	167.333	523	650.167	467.8	461.2	233	194.667	304.667	222.667	96	69	137.333	145.333	104.667	120.667	98.3333	89	492.333	569.333	0	Bonemarrow_CE
Cbr1		851	946.333	585	761.333	305.667	410	1335.8	1396.2	254.667	278	637.667	619.333	807.333	830.667	445	629.333	535.333	499.667	1093.33	1063.67	818.667	944.667	0	Spinalcord_CE
Cbr3		187	188.333	52.6667	52.3333	17.8333	21.3333	96.2	117	76.6667	74	26.6667	19.3333	6	6.33333	93.6667	158	93.3333	66	75.6667	91.6667	70.6667	103.667	0	Brain_CE
Cbr4	lipid_GO	282	291.333	250	330.333	97.5	124.833	253.8	241.2	183.667	170.333	355	284.333	504.667	567.667	566.333	796.667	502	1024	1548.33	1668.33	1001	1251.67	0	BAT_CE
Cbwd1		247	271	203.667	227.333	201	238.333	322	308.2	189.667	186.333	240	233.667	130.667	150	221	343	206.333	324	360.667	379	841.333	1024.33	0	muscle_CE
Cbx1		561.5	626.333	531.333	622.667	797.833	972.667	517.8	534.4	1086.67	1129.33	1202.33	1070	430	490	523	754.333	532.333	614.667	659.667	602.667	788.667	873.667	0	Ileum_RT
Cbx2		58.5	61	98.3333	104.667	178.5	270.5	119.2	121.2	114	113.333	179.333	153	229.333	200	62.3333	109.667	89.3333	89	53.3333	69.3333	41.3333	70.6667	0	Bonemarrow_CE
Cbx3		198.5	211.667	273.667	315.667	317.5	394	180.6	185.4	406.667	388.333	298.667	226	93.3333	96.6667	212.333	298.667	198.667	241.667	178	147.667	571.667	730.333	0	muscle_CE
Cbx4		928.5	1035.67	723.333	891	1055.33	1118.33	1213.4	1100.6	938	941.333	300.667	197	344.333	314	393	500.333	552.667	681	1544	853.667	153	201.667	0	BAT_RT
Cbx5		6456	8083	9670.67	10693.3	7561.5	9448.67	6663.6	6234.4	4457	5228.33	5197.67	4559	1197.67	1072	3257.33	4779.67	2371.33	2287.33	2038	2114.33	2405.67	3036.67	0	Hypothalamus_RT
Cbx6		4096	4692.33	3017.67	3393	1180.33	1680.17	8076.4	8228.2	764.333	766.667	406.667	313.333	86	94.6667	660.333	935	572.333	331.667	251.333	239	1179	1533	0	Spinalcord_CE
Cbx7		837.5	985	1234.67	1438.67	671.167	839.833	1732.8	1691.8	2620.67	2369.33	875.667	631.333	153.667	148.333	702.667	847.667	1020.33	944.333	504	352.333	1366	1432.67	0	Spleen_CE
Cbx8		284.5	334.667	203	236.333	177	192.5	231.2	221.2	218.667	193.333	122.667	132.667	142.667	138.667	100.667	156.667	144.667	143.667	203.667	200.667	124	119.667	0	Brain_CE
Cby1		506	570	396.333	482.667	290.167	330.167	741.4	702.6	146.667	150.667	143.333	144	86.3333	103	112	186	125	122.667	198.667	191	614.333	730.667	0	Spinalcord_RT
Cc2d1a		645.5	811.667	1149	1314.33	521.5	594.167	1432.2	1407.4	593	500	1034.33	859.333	275.333	272.667	339.667	513.667	367.667	361	311.667	307.667	1261.33	1185.33	0	Spinalcord_RT
Cc2d1b		438	446.667	971.667	1157.67	1023.83	1175.67	1617.2	1532.4	1440.67	1307.33	1073.33	861.667	354.333	355.333	645.333	988.667	797.667	740.333	709.333	739.667	1476	1584.33	0	Spinalcord_RT
Cc2d2a		605.5	760.333	1117.67	1366.33	35.5	45.1667	1195.2	1147.6	269.333	228.667	612	450.667	115.333	137	776.667	861.667	788	579	447.333	342	673	993.333	0	Hypothalamus_RT
Ccar1		1146	1399.67	1398.33	1533.67	2649.83	3170.83	1578.4	1588.2	2320.33	2241	2848	2436	947.667	985.667	1163.33	1746.67	1073	1383.33	1209.33	1115.67	1187.67	1709.67	0	Bonemarrow_CE
Ccbe1		64.5	72.6667	27.3333	32.6667	46.3333	54.5	89.2	78	265	246.333	76.3333	67.3333	64	52	314	225	23.6667	14	13.6667	5.66667	52.6667	90.3333	0	VAT_RT
Ccdc102a		37.5	52.3333	47.3333	42	49	55.6667	65.2	72.8	267.667	254.333	98.6667	84.3333	19.3333	25.6667	136	129	177	101	105.667	81	213.333	230	0	Spleen_CE
Ccdc107		49927.5	65319.7	9299	11588	239.667	288.333	412.2	423.4	27038	24838	24148.7	31511	8362	9011	16329	24241.3	21821.7	21254.7	16669.3	17416	809.667	1000	0	Brain_CE
Ccdc115		223.5	222.667	171	220	400.5	449.667	274.4	249.2	281	303	223	190.667	98.6667	129.333	144.667	249	172.667	178	246	202.333	672.333	881.333	0	muscle_CE
Ccdc117		406.5	611.333	550.667	481	1037.33	1325.67	624.8	760	1321.33	1280.33	725.333	791.667	542.667	688.333	464.333	621	616	687.333	716	830	1338.33	2042.33	0	muscle_CE
Ccdc12		319.5	339.333	194.333	222.333	614	655.167	318.2	371.6	531.333	521.333	473.667	415.667	153.667	180.667	179	221	226	205.333	265.333	233.667	1400.67	1488.67	0	muscle_CE
Ccdc120		231.5	262	230.667	273.333	12.6667	21	247	220.4	15.3333	15.6667	415	336.333	26	17.6667	66	181	25.3333	19	9.33333	17	13.3333	16	0	Ileum_RT
Ccdc122		49.5	43.3333	23.3333	27	25	23.5	85.6	69.4	51.3333	59.3333	87.6667	61.3333	80.6667	81	199.667	205.333	151	301	102	279.667	45	65	0	SAT_CE
Ccdc124		1386.5	1522.33	533	703.333	649.667	780.167	1565.4	1703.6	425.333	456.333	484	529.667	378.333	441.333	312.333	461.333	384.667	387.333	678	735.333	2873	2493	0	muscle_RT
Ccdc125		9.5	11.3333	22	32	1253.5	1185.83	13	10.8	300	284.667	149.667	103.333	163	168.667	125.333	211.667	129	202	177.667	283	15	32	0	Bonemarrow_RT
Ccdc126		222.5	249.333	190.333	200	214.5	204.833	387.4	364.4	96.3333	90.6667	49	39.6667	23.6667	34.3333	64	140	68.3333	72	66.3333	65.6667	95.6667	121.667	0	Spinalcord_RT
Ccdc127		1132	1372	1244.33	1410.67	661.5	790.333	2254.6	2124.8	673.333	640.667	801.667	677.667	418.333	464	698	874.667	704.333	731.667	1110	1001	1950.33	2374	0	muscle_CE
Ccdc130		137.5	144	141.333	174	205	240.167	296.6	285.8	188	156.667	154.333	127.333	66.6667	71.3333	102	116.667	109	93.3333	134	102	246	316.667	0	muscle_CE
Ccdc134		118	149.667	118.333	140.333	325	402.667	274	293	451	407.667	403.333	424	66.6667	69.3333	119.333	205.333	139.667	160	104	95.6667	722.667	1146.67	0	muscle_CE
Ccdc137		344	401	435.333	526.667	332.167	395.167	634.8	605.6	444.333	427	329.667	341.333	151	168.333	203.333	284	231.333	249.333	247	182.667	319.333	482.333	0	Spinalcord_RT
Ccdc138		68.5	73	110	131	105.833	131.333	69	65.2	88	87.6667	190	151.333	83.3333	82	89	134.333	50.6667	95	110	189	10.3333	20.3333	0	Ileum_RT
Ccdc14		78	81.6667	122.333	165.667	208.833	259.667	162	136.6	154.667	167	241.667	170	29.6667	25.6667	60.3333	107.333	62	57.6667	51.6667	46	171.667	218	0	Bonemarrow_CE
Ccdc141		591.5	642	623.667	750.333	37.3333	43.3333	987.8	820	78	75.3333	186.667	177.667	494	324.333	186.667	239.333	97	114.667	93.6667	96.6667	84	111.667	0	Spinalcord_RT
Ccdc142		107	111.667	184.333	210	220.5	282.833	232	204.4	301.667	327.667	187.333	184.667	83	94.6667	110.667	216.333	177.333	200	161.667	124	98	133.333	0	Spleen_RT
Ccdc146		24.5	26.6667	87.3333	106	5.16667	6.5	71	59.8	37.6667	36.6667	28.3333	24	13.3333	11.3333	45	34.3333	8.33333	9	11	9.33333	239	301	0	muscle_CE
Ccdc149		777.5	944	713.333	844.333	18.5	29	1946.8	2007.8	23.6667	21.6667	121.667	102.667	43.3333	59	143.333	153.333	129.333	85.6667	41.3333	48.3333	69.6667	87.6667	0	Spinalcord_CE
Ccdc15		60	66.6667	155.333	202.333	165.333	197.333	127	122.2	322.333	310.667	208.333	153	94	76	107.667	145.667	118.333	125	76.3333	87	41	72.6667	0	Spleen_CE
Ccdc157		449.5	516.667	1168.33	1233	173.667	244	1377.8	1343.4	258.667	263	155	135	403.667	423.333	321.333	395	332	286.667	294.333	225	453.333	588.667	0	Spinalcord_RT
Ccdc158		16	17.3333	42.6667	42.6667	12.3333	14.3333	10	9.8	43.3333	40.3333	18.6667	14.6667	13	21.6667	43.6667	55.6667	15	17	7.66667	8	6.33333	11	0	VAT_CE
Ccdc159		116.5	110	206.333	240.667	6	8.33333	242	211.8	13.6667	10	25	23.3333	110	125.333	102.333	126	110.667	116.667	123.667	126.333	26	33.3333	0	Spinalcord_RT
Ccdc162		41	49.3333	174	210.667	16.8333	21.6667	90.2	82.6	21.6667	22.3333	29.6667	41.6667	221	250.667	135.333	122	31	47.3333	33	101.667	51	40.3333	0	Liver_CE
Ccdc163		29.5	34	48	63.6667	220	252	234.4	185.6	164	159	149	125.333	64	70	59.6667	85.6667	78.6667	77	122.667	130.333	124.333	145	0	Bonemarrow_CE
Ccdc166		154	173	158.667	209.333	60.1667	77.6667	168.8	148.6	149.333	129.667	89.6667	57.6667	51	61	34.6667	108.333	40.6667	34.6667	18.3333	19.3333	21.6667	22.6667	0	Hypothalamus_RT
Ccdc167		75.5	95.3333	233.333	284	415.167	523	543	497.2	388	341.333	219	201	86.6667	81.3333	94	168.667	135	199	135.333	115.667	513	654.667	0	muscle_CE
Ccdc17		109.5	107.667	156.667	183.667	79.8333	92.1667	80.6	63.6	174	160.667	146	116	53	78.6667	166	242.333	126.667	122.667	122	127.667	46	56	0	VAT_CE
Ccdc171		225.5	224	233.333	282	89.8333	95	168.6	164	401.667	351	197	169.667	240	252.667	154.333	288.667	160	185.333	96.6667	111.333	42	57	0	Spleen_CE
Ccdc173		68.5	74.6667	88.3333	113	18.6667	20.3333	81.6	74.6	31.6667	32.3333	33.6667	20.6667	10	9.33333	55.3333	72.6667	35.3333	40.6667	27.6667	18.3333	24.6667	38.6667	0	Hypothalamus_RT
Ccdc174		299.5	388.333	595.333	690.667	362.5	410.167	657.8	680.8	720.333	626	680.333	603.333	206.333	207.333	487	597.333	639.667	663.333	536.667	471.667	419.333	591	0	Spleen_CE
Ccdc22		401.5	482.667	320.333	356	739	919.5	814.4	850.4	302.333	298.667	201.333	178.667	183	202	132.333	171.333	193	161.667	196.333	184	907.333	1087.33	0	muscle_CE
Ccdc25		655	754	646.333	774	820.667	1025.33	1488.6	1487.8	485.333	537.667	1471	1524.33	865.333	1020	442.667	842.333	485.333	731.667	646.333	738.667	1286.33	1656.67	0	muscle_CE
Ccdc28a		317.5	372	412	501.333	106.333	103.667	777.8	802.4	145.667	155	390.333	334	240.667	216.667	124	205	117.667	112.667	94.6667	109.667	258.333	278	0	Spinalcord_CE
Ccdc28b		221	306.667	249	311	209	214.833	397.4	404.8	229.333	218.333	124	96.6667	47	61.3333	223	311	211.667	286	384.667	431.333	858.333	927.667	0	muscle_CE
Ccdc3		178.5	246.333	136.667	149.667	11.8333	10.8333	1220.6	1197.4	32	23.6667	186.333	151.333	52	47.6667	475.667	371.333	1483	1218.33	1495.67	1309	610.667	875.667	0	BAT_RT
Ccdc32		747.5	878.667	471	565.333	341.167	407.667	1048.8	1021.2	256	255.667	483.333	486	107.667	131	166.333	199.333	173	184.667	256.667	245	199.333	302	0	Spinalcord_RT
Ccdc34		183.5	187.667	234	288.333	719.167	989	253.8	255.4	253.333	346.667	467	468	23	27.3333	115.333	151	102	83.3333	49	43.6667	113	144.333	0	Bonemarrow_CE
Ccdc43		434	476.333	363.333	456.667	294.833	356.167	484.6	497.2	364	343.333	548	467.667	231.333	253	264	331.667	291.333	326	467.333	444.667	3175	3522.33	0	muscle_CE
Ccdc47		1616	1762	1375	1729.33	1567.5	1844.33	3488.4	3430.2	1113	1051	1588.67	1599.33	1109.33	1398.33	905	1256.33	886.667	1000.33	1599.67	1314	5132	6306.67	0	muscle_CE
Ccdc50		1082.5	1408.33	1887.33	2148	1731.17	1974.67	2027	1882	4363.67	3680.33	3070	2452.33	1376.33	1500.33	4394.33	4703	3942.33	4431.33	2952	2943.67	5601.67	8389	0	muscle_CE
Ccdc51		188.5	182	96.3333	106.667	212.167	271.167	207.4	195.2	161.667	176	261.333	239	178.667	211	74	124	117	135.667	215	293	293.333	429.333	0	muscle_CE
Ccdc57		130.5	128.667	276.333	325.333	132.667	168.167	194.4	199.4	59	63.6667	103.333	77	55.6667	52.6667	111.667	251.333	97.3333	117	99	156.667	307.667	301.667	0	Hypothalamus_RT
Ccdc58		91.5	122	93	113.333	161.5	199.167	180.6	168.4	162.667	165.333	281	283.667	339.333	405.333	131.667	231.333	125.333	204	344.333	367.333	495.333	616.667	0	muscle_CE
Ccdc59		293	344.333	347.333	477.333	307.167	379.333	443.6	447	657.333	567	532.667	436.667	218.333	263.333	420.333	599	426.333	518	422.667	407	434	503.333	0	Spleen_CE
Ccdc6		720.5	935.333	1253	1366	1415.67	1937.5	2021.8	2066.2	1140.67	1134	2306.33	1974.33	669.667	555	965	1029	1029.67	744	942	835.333	4832	5653	0	muscle_CE
Ccdc61		197.5	201.667	167.333	204.333	290.167	338.333	288	320.4	254.667	236.333	285.667	266	72	87.6667	113.333	172.667	162	142	119.667	148.333	200.333	212.667	0	Bonemarrow_CE
Ccdc62		46.5	46.3333	138.333	158.667	59.8333	68.5	176.8	152.2	100.333	93	82.3333	46.3333	52.3333	39.6667	223.667	306	160.333	179.667	211.667	144.333	53	71	0	VAT_CE
Ccdc66		357	376	530.333	606.333	181.5	240	507	490.6	436.333	382	403.333	311	129.333	143	276.333	373.333	305.333	321.333	273	252	583	689.333	0	muscle_CE
Ccdc69		10.5	18	9.33333	9.66667	208.667	228.667	30.4	37.2	359.667	337	95	67.3333	10.6667	10.6667	312.667	392	460	519.333	917.333	796.333	259.667	414	0	BAT_RT
Ccdc71		576	703.333	546	658.667	609.833	711.667	934.6	891.2	645.667	652.667	676	548.667	301	321.667	334	406	405.333	311.333	451.333	432.333	846.333	989.333	0	muscle_CE
Ccdc71l		305.5	395	333	369	1551.17	1951.67	305.4	289	1285.33	1362	1591	1737.33	98.6667	112.333	652.333	676.667	566.333	517.667	424	271.667	263.333	335.333	0	Bonemarrow_CE
Ccdc77		66.5	92.6667	191.667	221	618.333	828.167	216.6	203.8	487.333	527.333	397.667	320.333	131	114.667	320	432.667	238.667	255	160	148.667	223.667	286.667	0	Bonemarrow_CE
Ccdc8		56.5	65.3333	70.3333	84	72	80.8333	76	68.4	163	134	51.3333	38	21.6667	21.6667	80	66.3333	88	41.3333	40.6667	21.3333	87	118.667	0	Spleen_CE
Ccdc80		156	159	128.333	146	54.1667	62.5	295.8	272.8	1178	1140	285.667	286.667	188	296.333	22144.7	14391	21152.7	6888.33	2344	1600.33	1649.33	1930.33	0	VAT_RT
Ccdc82		315.5	349.333	1055.33	1250.67	1184.33	1306.67	949.4	922.8	1623.67	1416	1037.67	831.667	133.333	139.333	900.333	1053.33	739.667	857.667	598.333	419.667	275.667	390	0	Spleen_CE
Ccdc84		67	86.3333	256	286.333	261.667	284.333	200.8	209.8	414.667	403.667	387.667	335	210.333	245.667	241	408.333	249.667	341	319	331.333	112	157.333	0	Spleen_CE
Ccdc85b		866.5	901.333	300.333	379	133	151.667	1705.2	2090	118	145	76	81	59.6667	72.3333	122.667	150.333	189.667	107	161	149.667	723.667	641.333	0	Spinalcord_CE
Ccdc86		110.5	140.667	129	161	309.333	367.167	239.2	234.6	271.667	290.333	228.333	209.333	141.667	190.667	102.667	140	111.333	108.667	176.333	124.333	1529.67	1393.67	0	muscle_RT
Ccdc88a		1927.5	2274.67	3061.33	3409.33	1085.67	1202.17	2658.8	2472.6	2138.67	1750.33	640.333	451.667	60.3333	87.3333	1105.67	1166.33	921.333	1165.33	1009.33	572.667	85	177	0	Hypothalamus_RT
Ccdc88b		66	71	64.3333	78.6667	3858	3469.33	152.4	149.6	1526	1390	463.333	335.667	52	55.6667	117	92.6667	279.667	292	119.667	117.667	72.3333	84	0	Bonemarrow_RT
Ccdc88c		612.5	718	806	944.333	4113.5	5003.67	1154.8	1105	4623.33	4191.33	1889	1384.67	85.6667	90.3333	869.667	660	968	1075.67	640.333	349	3188.33	3291.33	0	Bonemarrow_CE
Ccdc9		496	553.667	379.667	457	922.333	1011.17	1141.8	1187.6	744.667	708.333	927	772	249.333	278.333	431.667	474.667	470.333	367.667	337	291.667	1130	1101.33	0	Spinalcord_CE
Ccdc90b		227.5	245	225.667	262.667	160.167	202.667	522	422.4	203	179	377	352	113	138.667	336	479.333	346.333	394.333	563.667	522.667	814.667	888.333	0	muscle_CE
Ccdc91		1275	1392	890.333	1103.67	184.833	208.833	2042.8	2048	395.333	376	1074.33	1077.33	512.333	571.667	681.333	977.333	702.667	818.667	937	1766.33	6918	6831	0	muscle_RT
Ccdc93		603	752.333	994	1156.33	688	778.667	1462.4	1425	1434.67	1274.67	2042.67	2012.67	479	516.667	513	620.667	663.667	650.333	598.667	563.667	878	1294.67	0	Ileum_RT
Ccdc94		114	144.667	88	119.667	192	227.167	194.8	185.6	213.333	209.667	141.667	116	68	73.3333	87.3333	135	106.667	101	106.667	104.667	266	271.667	0	muscle_CE
Ccdc97		478.5	507.333	287	345.333	1500.67	1665.17	1570.2	1564.8	546.667	518	415.333	337	246.667	214.333	254.667	317	324.667	264.333	283.667	312.667	2592.67	2637.33	0	muscle_CE
Cchcr1		62	68.6667	65	66.6667	595	705.5	274.6	267	175	218	237	200	68.6667	61	147	146.333	155	144.667	75	81.3333	72.3333	110.667	0	Bonemarrow_CE
Ccl25		103	126	347	426.667	33.8333	39.6667	127.4	143.6	302.667	276.667	7525.33	6717.67	224.667	186.333	243.667	331	217.667	303.333	248.333	163	142.333	193	0	Ileum_RT
Ccl27a		320	374.667	233.333	271.667	12.1667	14	231.8	243	20.6667	23.3333	17.3333	18.6667	46.6667	58.3333	51	89.3333	43.6667	81.6667	112.333	152.667	219.333	222	0	Brain_CE
Ccl6		29.5	25.6667	13.6667	22.6667	5412.83	5338.67	96.2	75.8	659.333	877	5845.67	5280.33	89.6667	109.333	2009	1283.33	2313	1941	352	282	543.333	986.667	0	Ileum_RT
Ccl9		31.5	22.3333	17	27	1712	1400	66	53	220	276.667	486.333	462.333	926.333	1203	1040.67	691.667	1369.67	949	205	152.667	409	620.667	0	Bonemarrow_RT
Ccm2		899	1011.67	474	545.333	1529.33	1825	1161.8	1099.2	1981	1826.33	483.667	357.667	290.667	362.333	547.333	581	814	774.667	655.667	517.333	1165.67	1199.33	0	Spleen_CE
Ccm2l		21.5	32.6667	49.6667	66.3333	42.8333	49	140.2	131.4	110.333	97.6667	32	32.6667	51	57.3333	167.333	181.333	153.333	190.667	276	259.333	358.333	383	0	muscle_CE
Ccna2		14.5	29.3333	71	64.6667	9335	11574.8	60.8	70.8	2098	2994	1900.67	1739.67	36.6667	26.6667	44	65.6667	50	60	17.3333	25.6667	10.3333	25.3333	0	Bonemarrow_CE
Ccnb2		20.5	21.6667	37.6667	33.3333	4068.17	5236.33	20.2	26	829.333	1268	757.667	677.333	24	19.6667	23.3333	31.3333	26.6667	32.6667	12.3333	7.66667	7.66667	22.3333	0	Bonemarrow_CE
Ccnc		587	690.667	619.333	677.667	454.667	522.167	711.8	619.2	537.667	428.667	634	594.333	305.333	361.333	521.667	610.667	356	567	392	487.667	242	336.667	0	Spinalcord_RT
Ccnd1		622	721.333	485	609	495.333	533.333	1495.8	1395.6	1295.33	1096	2107	1797.67	271.333	389.333	401.667	673.333	344.667	282.667	139.333	216.667	464.667	606.333	0	Ileum_RT
Ccnd2		701	992.333	361.333	398.667	1376	1703.33	996.6	914	2414	2105.33	7466.33	5562.67	233.333	224.333	3691.33	3529.33	3527.67	2544.67	619	709.333	575	1005.33	0	Ileum_RT
Ccnd3		286.5	340.333	258.667	302	9964.83	12918.7	757.8	742.8	2420.67	2564	560.667	414.333	359.333	345.333	712.667	1003.33	922.667	1019.67	668	692.333	1007	1205.67	0	Bonemarrow_CE
Ccndbp1		963	1048.33	707.667	845.333	2607.83	3504.17	1747	1719.8	1269	1269.33	781	687.667	244.667	270.667	374.667	474	433	394	523	494	1039	1107	0	Bonemarrow_CE
Ccne1		305.5	363.333	110.667	157.667	1897.17	2572	470.2	470	625	881.667	170.667	139.667	14.6667	13	28.6667	37.3333	63.3333	67.3333	32.3333	48.6667	18.6667	20	0	Bonemarrow_CE
Ccne2		186.5	210	194.667	211.333	1774.67	2115.67	81.2	69.6	604.667	886.667	386	377	37.6667	30.3333	119.667	149.333	73.3333	114.333	95.6667	53	159	198.667	0	Bonemarrow_CE
Ccnf		66	96.6667	42.6667	42	3795	4428.17	65.2	72.6	596.333	864	471	422.667	325.667	389	25.6667	38.6667	51.3333	34	22.3333	15.3333	49.3333	40.6667	0	Bonemarrow_CE
Ccng1		1839.5	2117.33	1121.67	1260	1386.67	1613.5	1700.8	1581.2	2385	2158.67	2431.67	2377.33	791.333	931.667	3380.67	4524.67	3459.33	5491.33	7961.67	8745.33	46660.7	49394.7	0	muscle_CE
Ccng2		730.5	961.667	392.333	419.667	1700.83	1921	671.4	698.8	1293.67	1145.33	4850.33	5500	452.333	433.667	921	1313	927.333	1508	1267.33	1752.67	731.667	863.333	0	Ileum_CE
Ccnh		928.5	1005	606.667	718.333	504.5	606.5	850.4	814.6	664.333	612	418.333	365	301.333	341.333	374	674.333	361.333	525	552.667	520	702.333	825	0	Brain_CE
Ccni		1753.5	2319.67	1091.67	1213.33	2326.67	2732.5	2743.2	2700.4	1575.33	1594.67	2337.67	1765.67	1195.67	1120	2212	2735	2106.33	2393.33	3378.33	3045.33	2071.33	2713	0	BAT_RT
Ccnj		139	163.667	163	180.667	398.667	480.5	255	249.6	372	321.667	198.333	150.333	78	86.6667	167.667	194.667	157	182	203.667	131.667	182.333	279.333	0	Bonemarrow_CE
Ccnk		104	139.667	229.333	216.333	1266.5	1519.17	990.4	932.4	306.333	282	443.667	323.667	156.667	118.333	214.333	194.667	227	178.333	174	156.333	9555	8585.33	0	muscle_RT
Ccnl1		397	552.333	876.333	965.333	2103	2336.83	881.8	822.4	3484.67	3063	2958.33	2450	808	909.333	1692	2631.33	1632.67	2457.33	2756.67	1583.33	543	834	0	Spleen_CE
Ccnl2		652	789.667	1856.33	1912	3327	3802.17	1803	1884	3985.67	3934	3909	3752.67	1974.33	2328.33	3500.67	4255.33	3910.67	5006.67	3406	3959	1751.67	2601	0	SAT_CE
Ccnt1		962	1264.67	1271.33	1396	640	816.667	449.8	448.8	2396.33	2368.33	1955.67	1800	780.333	882.333	1014	1356.67	990.667	1129.67	1346.67	1098.33	282.333	374.333	0	Spleen_CE
Ccnt2		1117	1472.67	2286	2497.33	1261.83	1515.83	1577.2	1510.4	3617.67	3197.67	2970.67	2328	1001.33	967.333	1554.67	2187.67	1497.67	2184.33	1730.33	1669	1193.67	1614.33	0	Spleen_CE
Ccny		2749	3358.67	1606	1883.33	1378	1701.17	2550.6	2280	1962.67	1909.67	2086.67	1926.33	1374	1560.67	1647.67	2268	1635	1729.67	2504.67	2805	3611.67	4038	0	muscle_CE
Ccnyl1		63	91.3333	104.667	113.667	74.6667	67.1667	238	212.6	81.3333	77.3333	222.333	193.667	49.3333	60.3333	114.333	150.333	98.3333	117	125.667	147.333	792	918	0	muscle_CE
Ccp110		1206.5	1476.67	1653	2120	1465.83	2030.67	4980.8	4724	636	710.667	265.667	216	177.333	164	272	459.333	235	307	258.333	227.333	186.333	308.333	0	Spinalcord_RT
Ccpg1		1267.5	1563	1560.33	1842.67	3848	3839.67	3945.6	3916.2	1000.33	982.333	978.667	788	772	980.333	879.333	1426.33	1018.67	796.667	1331.67	1198	5449	5767	0	muscle_CE
Ccr2	marker_Ther	12.5	17.6667	25	19.3333	4921.17	4483.33	26.8	27.4	1064.67	1146.67	314	192.667	23.3333	34.6667	1353.33	1236.67	1276.33	1306.67	317.333	201.333	185.333	214	0	Bonemarrow_RT
Ccr5		53	71	42	50	199	191	164.6	140.2	293.333	235	241.667	153	85.6667	115.333	219.333	165.667	324	204.333	76.3333	78.3333	45	41.3333	0	SAT_RT
Ccrl2		22.5	21.6667	23.3333	24.3333	346.167	464.833	40	43.6	208	245	72	66.6667	23	29.6667	32.3333	54	45.3333	44	51.3333	68.3333	505.667	540.667	0	muscle_CE
Ccs		347.5	365.667	220	246.333	365.5	488.167	549.4	608.4	242	294	459.667	429	2201	2555.33	256	377.333	275.333	336.667	925.667	786.667	551	697	0	Liver_CE
Ccsap		693	831.667	190.333	243.667	234.5	276.167	183.4	176.8	121.667	144.667	122.667	103.667	7	6.66667	26	50.6667	26.6667	27.3333	11.3333	8.33333	9.66667	10	0	Brain_CE
Ccser2		2944	3696.67	3035.67	3511.33	492	567.167	4395.8	4000.8	1762	1507.67	3570.33	3438.67	1538.67	1408.33	3012.33	2624.33	2315	2125.33	3169.33	2859.67	4946.67	6069.33	0	muscle_CE
Cct2		3965.5	4675	2919.67	3466	4618.5	5718.67	4840	4939.2	4115.33	4299.67	4080.67	3592.33	2000.33	2380.67	1773.33	2995.67	2009	1833.67	2633.33	2617.33	5609.67	5669	0	Bonemarrow_CE
Cct3		2789.5	3228.67	2569	2887.67	2915	3678.5	4103.6	4071.4	2892.33	2983.33	3022	3023.33	1897.67	2233.33	1052.67	1791.33	1209.67	1433.33	2125	2541.33	4833.67	5606.33	0	muscle_CE
Cct4		2583	2851.33	2518	2843.33	3587	4513.5	3333.2	3404.6	4096.33	4122	3394.33	3586	1681	2201.67	1865.33	2948.33	2271.67	2450	3042.67	2582.33	4908.67	5323.33	0	muscle_CE
Cct5		4293	4644.33	3480	3984.33	5294.5	6678.67	5548	5491	5125.67	5372.67	4431	4561.33	2671.33	3472	2088.33	3345.33	2564.33	2514	3496	3484.67	7820	8508	0	muscle_CE
Cct6b		8.5	8.66667	14.3333	17.6667	7.5	6.33333	11.6	10.4	7.66667	5.66667	11.3333	7	13.6667	12.3333	28	42.6667	20	23	25.3333	18.6667	6	10.3333	0	VAT_CE
Cct7		4247	4795.33	3537	3998.33	4635.5	5716.33	6143	6429.4	3022	3356.33	3025.33	2916.67	1620.67	1996.67	1367.67	2017.67	1600.67	1401	2105	2049.67	6988.33	6842.33	0	muscle_RT
Cct8		3977	4308	3442.67	4164	4679	5881.83	6349.2	6260	3361.67	3532	3244.67	3473.33	2162.33	2791	1292.67	1906.33	1454	1639.67	2437.33	2277	6163	6817.67	0	muscle_CE
Ccz1		755.5	843.667	493	611	1275.83	1464.33	1090.2	1055.6	1152.33	1131.33	1833.67	1593	641.333	756.667	780	1055.67	782.333	1003.67	1176.33	1316	2002.67	2028	0	muscle_CE
Cd14		44.5	48.6667	19.3333	24.6667	132.667	130.667	99	84.6	298.333	318.333	228.667	217.333	28	38.3333	217.333	305.667	299	186.333	119.667	98.3333	101.667	169.667	0	Spleen_RT
Cd151		630	731.333	582	675.333	617.333	734.5	1482.2	1309.2	830	866	2546.67	2623.67	700	881.667	4327.67	5162.67	4102	3075.67	3628	3720.33	5416	5416	0	muscle_RT
Cd163		56	65.3333	52.3333	52	967.667	1836	54.4	50.4	1309	1256.33	94	90	303.333	412.333	838	854	2130	1357	408.667	437.667	591.333	1033.67	0	SAT_RT
Cd164		1280.5	1568	1444.33	1651.67	4250.5	4532.5	3207	2773.2	3777.67	3326.33	8836.67	7066.67	5536.67	5531.33	5618	5479.33	4500	4828.67	3740.67	4142	5943.67	6006	0	Ileum_RT
Cd180		18	19.6667	12.6667	16.6667	1011.33	1213	115.4	79.4	1211.67	888	163.333	73.3333	26.3333	30.6667	71.6667	57	158	161	24.6667	42	24	38.6667	0	Bonemarrow_CE
Cd1d1		8	14.6667	32.3333	58	285.833	339.333	102.6	91.2	872.333	756.333	90	74.6667	2701.67	3069	2519	2408	2437.67	3023.67	2732.33	2707	109.667	373.667	0	Liver_CE
Cd200		1453.5	1696	2384.67	2979	106	123.667	2441.6	2283.4	777.667	609.333	391.667	336.667	15	20.6667	351.333	508.333	319.333	288.333	433.333	525	640	830.333	0	Hypothalamus_RT
Cd248		63	46.3333	47	56.6667	13.3333	18.1667	101	94.4	68.6667	82.3333	31.3333	37	12	10.6667	357.667	523.667	1404.33	417.333	226	237	1597.33	2375	0	muscle_CE
Cd24a		232.5	279	343	390.333	37961.8	52016.8	2246.2	1944.2	12453.7	15324	4679.33	3780.67	31	39.6667	872.667	1679.67	270.333	413	283.667	193	13434.3	13005.3	0	Bonemarrow_CE
Cd274		35	36.3333	94.3333	96	223	241.667	211.4	180.6	914.333	798.333	702.333	571	50.6667	43.6667	245.667	362.333	380.667	702.333	1619.67	839.333	181.333	254.333	0	BAT_RT
Cd276		122.5	140.667	109	133	16.6667	25.6667	189	166.6	41	43.6667	105.333	92	119.333	88.6667	23	53.3333	80.3333	25.3333	25.3333	14.6667	294.333	335.667	0	muscle_CE
Cd2ap		479	519	694.333	842.667	757.833	949.833	978.6	907	2495.33	2154.67	8751.33	7061	779.667	773.333	1502	2079	1022.67	1106.33	875	787	674	1065.67	0	Ileum_RT
Cd2bp2		1676.5	1854.67	1374.67	1629.33	1718.83	2071.67	2579.2	2431.8	1469	1470.67	1232.67	1058	494.333	535.667	561	848.667	670.667	642	670.667	688.667	1661.67	1913	0	Spinalcord_RT
Cd300a		30	33.3333	17.3333	20.6667	1752.5	1631.5	35.6	32.2	1159.33	1293.67	109	71.6667	62	75	153	181	271.333	121	57	43.3333	110	142	0	Bonemarrow_RT
Cd302		217	256.333	132.333	160.333	259.167	313.833	321	297.6	564.333	561.667	475.333	496.333	3127.67	3900.67	1484.33	1431.67	1785.67	1566	957	633	361.667	588	0	Liver_CE
Cd320		290	296	298.667	356.333	65.5	88.8333	378.6	412	73	83	103	91.6667	56.3333	79.3333	563.333	789.667	277.333	343	336.333	321.667	585	578	0	VAT_CE
Cd33		66.5	97.6667	69.3333	76	3638	3245.67	183.4	153.2	524	515	191	115.667	20.3333	16.3333	195	184.333	222	234.667	70.3333	71	40	93.3333	0	Bonemarrow_RT
Cd34		941.5	1156.33	335.333	394.667	736	814.167	913.4	707.6	470.333	392.667	348	322.667	33	46.3333	1796.67	3292.33	3050	1908.33	1093.33	1018.33	3233.33	4697.33	0	muscle_CE
Cd36	marker_Ther	40.5	32	80.3333	98	3528.67	4742.5	35.4	46.4	5902	5609.33	608.667	846.667	914	751.667	61756.3	55111.7	46607	56740.3	56375.3	46743.7	9725	15083	0	VAT_RT
Cd37		43.5	34.6667	27	28.6667	3378.83	3885.33	118.2	102.4	4925.67	4300	526	238.667	20	23	168.667	110.667	526	881	40.6667	35	80.6667	145.333	0	Spleen_CE
Cd38		185.5	219.333	324.333	352.667	553.5	813.667	943.8	857.4	2668.67	2305	4230	4053.67	195.667	259	350	303.667	465	443	227.667	252.667	278.667	346.667	0	Ileum_RT
Cd3eap		285	318	267	341.667	242.833	296.5	382.6	388.4	230	259	149.333	123.333	67.3333	106	135	209.333	153.667	141.333	181.667	147.667	786.667	900.333	0	muscle_CE
Cd44		108	112	154	176	7697.17	7485.17	616.2	506	3982	4037.67	1831.67	1466	173.333	193.667	387.667	310	562.333	401	111.333	110.333	272.333	406.667	0	Bonemarrow_RT
Cd46		250.5	302.333	1136.67	1200.33	30.3333	41.6667	56.2	36.2	418.333	376	386.333	283	145.333	158.333	443.333	591.333	368.667	422.667	313.667	230.667	32.6667	32.6667	0	Hypothalamus_RT
Cd47		1707.5	2187.33	1108.67	1286.33	5844.67	7703.83	1263.4	1170.8	4069	4130.33	2385.33	1933.67	1294.67	1130.67	1735	1646	2149.33	1503	721	647	613.333	853	0	Bonemarrow_CE
Cd48		10.5	12	10	8	1170.33	1265.33	30.8	26.2	1713.67	1510.33	295	195.667	21.3333	31	170	183.667	341.333	486	52.6667	43	55.3333	121.333	0	Spleen_CE
Cd52		23	32.3333	18.3333	16	5636.67	4993.17	73.8	64.4	7367	6133	994.333	598.333	45	75.3333	3913	13493.3	725.667	1279.67	71	64	70.6667	870.667	0	VAT_CE
Cd53		114.5	111.333	82.3333	88	5237.67	5172.17	211.4	176.8	6411	5139	860	502.333	76.6667	97.3333	526.333	406.333	872.333	1471	116.333	102.667	86.3333	153	0	Spleen_CE
Cd55		97.5	104	133	148.333	946.167	1220.17	416.4	322.2	5369	4232	2023.67	1736.33	225.667	357.667	497	707	1270	1506.33	300.333	226	2079	2618.33	0	Spleen_CE
Cd59a		104.5	107	123	159	265.333	408.5	647.6	536	99	135.667	195.333	147.667	568	664	898.333	691.667	1055.33	1134.67	1428.33	2036.67	701.333	946.667	0	BAT_CE
Cd63		245	254.667	159.667	181.333	1222.83	1176.5	1076.8	1100.8	150.667	150	677.333	720.667	14.6667	12	453	663	545	353.333	127	130.333	4571	4897	0	muscle_CE
Cd68		115	138.333	61.3333	64	1213	1442.17	169	139.2	1014.33	1178.67	131	96.6667	91	131	241.667	265.333	411.333	230	117.667	103.667	207.667	438.667	0	Bonemarrow_CE
Cd72		9.5	10	5.66667	11.3333	1528	2007.83	14.6	14.2	1701	1470.33	338	181.333	23.6667	42.6667	21	33.3333	150.667	249.333	20.3333	16	7	14	0	Bonemarrow_CE
Cd74		136	136	122.333	130.333	10472.3	12884.3	334.6	408.2	64965.3	56296	33236	26620.7	746.333	922	4159	4506.33	8684	5993	2435.67	1820	3985	5121	0	Spleen_CE
Cd81		8299	9311.33	7165.33	8372.67	1515.33	1908.33	14616.8	13824.2	4690	4422.33	2019	1714.67	4216	4779.33	3609	6190.33	4358.67	3229	5174.67	3848.33	3418.67	4291.33	0	Spinalcord_RT
Cd82		478.5	481.667	313	378.333	4502.83	5787.5	1876.2	1656	3068.67	3447	5752.67	6099	1039.67	1248.67	413	933.667	385.333	293	267	186	626.667	623.667	0	Ileum_CE
Cd83		654	735.667	1287.67	1569	218.833	290.333	2545.6	2456.2	2067.33	1801.67	533.667	249.667	17.6667	33.3333	140.667	131.667	300.667	316.667	77.3333	46	48	134.667	0	Spinalcord_RT
Cd84		53	53.3333	51	46	2416.83	2507.33	112.6	80.2	2073.67	1889.67	324.667	181	87.3333	116.333	378.333	274.667	452.333	531.667	67.3333	60.3333	45	85.6667	0	Bonemarrow_CE
Cd86		39	32	24.3333	30.3333	257	301.667	68.4	52.2	1754.67	1703	146.667	90	44.6667	65.6667	130	124	213.333	278	41.3333	42.3333	33.6667	78.3333	0	Spleen_CE
Cd9		596.5	645.333	360.333	445.667	3671.5	3825	1915.6	1932.8	750.667	781	1285.67	1290	135.667	201	236.667	656	234.667	127	110.333	85.3333	782.333	1068.33	0	Bonemarrow_CE
Cd93		227	311.333	324	332.333	3058.83	3728.33	421.6	422.2	1912.67	1686.67	570.667	425.333	172.667	272	1260	1802	1834.67	1447.33	2114.67	2464.33	1949.67	2780.67	0	Bonemarrow_CE
Cd99l2		2030.5	2381	2646.67	3175	354.667	432.833	5815.6	5466	390.667	390.333	358.333	258.667	509.333	613.333	1303.33	1479.67	1474	1340.67	2131.33	1950	6360	5999.67	0	muscle_RT
Cdadc1		473	531.333	376	506.333	650	714.167	1924.2	1954.4	223.333	186.333	326	351.667	405.333	470.667	330.333	335.667	350.333	353	488.333	472.667	1555.67	2034.67	0	muscle_CE
Cdan1		255	312.333	627.333	656.667	1694.83	2026.67	1051	1031.6	716	795	408.333	360	158.667	161.333	329	448.333	361	380	255	249.667	411	476.667	0	Bonemarrow_CE
Cdc123		1085.5	1214	957.333	1139.67	1333.17	1639.17	2564.2	2513.6	801	795	1066	1036.67	564	639	742.333	1082.33	766	822	990.333	1015.33	1857	2259.67	0	Spinalcord_RT
Cdc14a		131.5	127	206	232	776.333	759.333	176.8	176.4	729.667	663.333	1021.67	853.667	31.6667	40.3333	218	252	189.667	213	244	144.333	909.667	1220.67	0	muscle_CE
Cdc14b		1201.5	1160.33	723.667	823.333	143.833	151.833	617.8	541	288.333	269	645.333	488	914	964.667	222	338	256.667	244	371.333	409	399.667	436	0	Brain_RT
Cdc16		1013	1146.33	985.333	1152.33	870.167	1110.83	1527	1391.6	1023	984.333	987.333	903.333	453.333	569.333	935.667	1298.67	988	1046.33	881.667	914	1713.67	1909	0	muscle_CE
Cdc20		33	31.6667	11.3333	18	2580	3163.67	35.8	29	537.333	821	842.667	766.333	57.3333	26	24.6667	32.3333	33.6667	24.6667	13.6667	19.3333	15	18.6667	0	Bonemarrow_CE
Cdc23		907.5	1095.33	1033.67	1201.33	1480.5	1784	1524	1399.4	1044.67	1015	712.667	604	255	306.333	561	805.333	667.333	543.667	677	585.333	1092	1319.33	0	Bonemarrow_CE
Cdc25a		160.5	173.333	261.333	300.333	1721	1790.17	329.6	292.8	641.667	808	2110	1773.33	87	103.667	166.667	208.333	161.333	178.333	406.333	190	445	488.333	0	Ileum_RT
Cdc25b		145	159	142.333	157.667	7676	11053.5	399.8	384.2	1820.33	2028.67	672	481.333	20	23.3333	149.667	112.667	301.333	196	106	67.6667	131	200	0	Bonemarrow_CE
Cdc26		179.5	211	266.667	339	245.667	287.333	224.2	225	385.667	382.333	362.667	328.667	202	224	281	386.333	290.333	327	314.667	305.667	778.333	1010.33	0	muscle_CE
Cdc27		1713	1965.33	1678	2057.33	2335.5	2899.83	1891.6	1748.4	1866.33	1842.33	1994.67	1791.33	878.333	888.333	1751.33	2259.33	1640.33	1887.33	1717	1591.67	1158	1500.33	0	Bonemarrow_CE
Cdc34		700	730.667	325.333	385	1039.83	1210	737	727.6	635.333	752.333	722	718.667	888	1003	454.333	822	646.333	1236.33	1564.33	2436.67	12712.7	12464.7	0	muscle_RT
Cdc37		2167.5	2369.33	1125	1433.33	2999	3590.5	3571.4	3684.6	1786.33	1845	1489.67	1350.67	965.667	1180.33	840.333	1062.67	1129.67	883	1395	1326	4856	5108	0	muscle_CE
Cdc37l1		1385.5	1652.33	1513.67	1805.67	641.167	727.833	3902.6	3850.4	1176.67	1070	941.333	798.333	813	886.667	923.667	2075.67	772.333	1144	1232.67	1384	2158.33	2653.33	0	Spinalcord_RT
Cdc40		421	507.667	316.667	372.667	1363.67	1565.17	688	653.2	712	689	820	668	368	366	416.333	507	453.667	367	375	323	417.667	601	0	Bonemarrow_CE
Cdc42		5111.5	5861	3704.67	4267.33	8251.67	8721.83	6891.8	6248.6	7693.67	7087.33	9394.33	8409	2011	2379	4422	5215	4485.33	4674.67	5260	4932.67	7967.67	8901	0	Ileum_RT
Cdc42bpa		5978	7210	8162.33	9610.67	722.667	1029	10170.8	9131.2	938.667	908	1908.33	1656.67	1408	1328.33	2108	3235.67	1641.33	1656.67	2526.33	2224.33	1684	2064.67	0	Spinalcord_RT
Cdc42bpb		2703.5	3344.33	3668.67	4195.67	550.167	644.167	4695.2	4630.6	1206	1137.33	5602.33	4533.33	2639.67	2315.33	1781	2322.67	1899	1482	2597	2227.67	1874.33	2368.67	0	Ileum_RT
Cdc42bpg		112	124.333	140.333	161.667	415	471.667	285	301	313	313.333	2406	2115.33	306.333	289.333	427	499	343	299.667	243.333	337.667	703.333	715	0	Ileum_RT
Cdc42ep1		621.5	664.333	391.333	470.667	71.1667	77.8333	2384.4	2288	321.667	328.333	251	236	359.333	426.333	1225	725	1100	638.667	553	446	639.667	691	0	Spinalcord_RT
Cdc42ep2		384.5	428.667	200	232.667	271	281.667	1189.2	1066.4	349	399.333	607.333	764.333	56.3333	76.3333	217.667	242.667	319	197.667	251.333	168.667	1151.33	1325	0	muscle_CE
Cdc42ep3		250.5	327	168.333	196	2077.83	2346.67	197.2	206.2	761.667	907.667	287.333	233.667	36.3333	47.3333	239.333	256	172.333	156.667	154.333	98.6667	1205.33	1593.67	0	Bonemarrow_CE
Cdc42ep4		1328	1412.33	740.333	886.333	1095.33	1323.17	1507	1670.8	590.333	719.667	1012.67	897.667	676	842	760.333	1188.33	806.667	637	510.667	507.333	379.667	520.667	0	Spinalcord_CE
Cdc42ep5		25.5	22	11	9	58.6667	80	25.4	23.8	64.6667	77	1451.33	1403.67	43.3333	43.3333	81.3333	67.3333	88.3333	62.3333	72.6667	65.6667	67.3333	75.3333	0	Ileum_RT
Cdc42se1		1144	1351	793.333	820.667	4967.5	5085.83	1718.4	1695	3484	3652.67	2260.33	1857.67	295.333	326.333	805.333	1324.33	1087	1114.67	758.667	793	929.333	1330.67	0	Bonemarrow_CE
Cdc42se2		3414.5	4083.33	1596.33	1821.67	2074.33	2325.5	2573.4	2391.2	3530.67	3373.67	4632.33	5196.67	287.667	344	595.333	1588	761.667	790	637	627.667	1827	1935	0	Ileum_CE
Cdc45		35.5	51.3333	26	42	1705.67	1956.33	80.4	79	371.333	572.333	330	299.333	32.6667	29.6667	107.333	102	94.6667	89.3333	115	134	130.667	152.667	0	Bonemarrow_CE
Cdc5l		880	1102.33	664	823.667	1368.67	1624.67	997.6	1050	1161.67	1126.33	944	838.667	287.667	362.333	295.667	551.333	412.333	323	490.333	393.333	2536.33	2712.67	0	muscle_CE
Cdc6		15.5	17.6667	12.3333	12.6667	2726.5	3672.17	14.4	20.4	812	1347	249.667	231.667	7	6.33333	29.3333	20	37.6667	37.3333	26	21.6667	11	32.3333	0	Bonemarrow_CE
Cdc7		162.5	206.667	623.333	721.667	1019.83	1283.83	626.2	634.2	595	631	334.667	343.333	7	11	63	108.333	108.333	168	83.3333	101	22.3333	33	0	Bonemarrow_CE
Cdc73		813.5	1133	1254.67	1394.67	707.5	848.167	530.4	530.8	954.667	804.667	1366.33	1087.33	445.667	371.667	1477.67	1465.33	1071.33	1113.33	856	743.667	772	924.667	0	VAT_RT
Cdca2		8	10.6667	7	8.33333	1574.17	1797.33	16	15	443.667	581	645.667	563	31	22	26.6667	58.6667	25	31.3333	16	19.3333	14.3333	17.6667	0	Bonemarrow_CE
Cdca3		14	18.3333	9	12	4313.83	5642.83	41.2	39.2	807	1242.67	1024.67	903.333	48.3333	34.6667	46	63.3333	40.6667	50	31.3333	34.3333	49	35.6667	0	Bonemarrow_CE
Cdca4		163	168	151.667	169.667	1987.83	2412.33	137.8	134.2	1064.67	1243.33	627.333	538.667	73.6667	102.333	165.667	285.333	227	249	175	186.667	124.667	185.333	0	Bonemarrow_CE
Cdca7		59.5	65.3333	23	31.3333	1928.5	2181.17	59.2	54.4	470	657.333	1026	968.667	43.6667	39.3333	25	61.3333	40	35.3333	14.3333	14.6667	17.3333	19.6667	0	Bonemarrow_CE
Cdca8		26	33.6667	36.3333	39.6667	3255.83	4066	29.8	35.4	492.333	704.667	554	523	31.6667	24.6667	32.6667	41.3333	41.6667	35	17.3333	32.6667	27.6667	23.6667	0	Bonemarrow_CE
Cdh11		1547.5	1910.67	1469	1720.67	222.167	340.833	1566.8	1562.6	855.667	614.667	549.333	418.333	6.33333	8	476	520	146.333	80.3333	32	32.3333	55.3333	81.3333	0	Brain_CE
Cdh2		1834	2238.33	2289	2865.33	68	79.1667	2225.6	2069.4	103	74.3333	53.3333	30	2219.67	2335	53	50	119	115	1099.67	554.333	23.6667	42.6667	0	Hypothalamus_RT
Cdh23		379.5	366.667	494	644.667	75.1667	66.5	276.4	253	222.333	228.667	68	55.6667	6	7	270	207.333	242.333	188	457.333	204	348	404	0	Hypothalamus_RT
Cdh24		99.5	107.667	150.667	177.333	156.333	184.333	391.8	378.6	50	52	47.6667	53.3333	8	8	14.3333	58.6667	16	14.3333	18.3333	9	7.33333	24	0	Spinalcord_RT
Cdh5		204	257.333	165	178.667	237.667	318.167	600.6	512	773.667	671.333	218.333	203.333	436.667	529	994.333	1346	1590	803.667	2200.67	2084.67	3808	4353	0	muscle_CE
Cdip1		4947	5738.67	4173.33	4753	550.833	677.667	8234	7691.8	950.667	919.333	1073.67	863.667	1161.33	1305	1090.33	1657.67	1458.33	1557.33	3927.33	2451.67	5743.33	6258.33	0	Spinalcord_RT
Cdipt		2233	2456.67	1262	1485.67	1442.17	1590.17	2453.4	2352	1029.33	1045.33	2270.67	2255.33	655	756	483.667	863.333	566	485	575	646.667	1712.67	1769	0	Brain_CE
Cdk10		550	576.333	749.333	876.333	233.5	275.667	943	912	411.667	385	347.667	316.333	259.667	308.333	284.667	463.667	327	377	342	339.333	564.333	633	0	Spinalcord_RT
Cdk11b		561.5	611.333	515.667	690.667	2735.67	3108.67	2600.4	2618.6	1039.67	976	1780.33	1755.67	394.333	406.333	521.667	618	602	561	626.667	506.333	3146.33	3487	0	muscle_CE
Cdk12		831	1065.67	1617	2016.33	2087	2467	809.6	786.4	3509.33	3410.67	3404.67	2650.67	1082	1118.33	1755.33	2259.67	1707	1911.33	1951.33	1369.67	513.333	803.333	0	Spleen_CE
Cdk13		1610	2089.67	2244	2649.33	2138.83	2441.5	1505.8	1401	5306	4894.67	3935.33	3236.33	1245.67	1298	1863	2867	2152	2506	2331	2037.33	714.333	1077	0	Spleen_CE
Cdk14		4722	5597	3302.33	4192.67	67.8333	72.1667	6757.8	6380.4	1242.67	1092.33	291.667	207	63	69.6667	1058	1065.67	1488.33	1383.67	612.667	707.667	176.333	281.667	0	Spinalcord_RT
Cdk16		3748.5	4159.67	1699.67	2042	1779.67	2204.5	7986.8	7438.8	941.667	988.667	2310	2093	448.333	469.333	1642	2065	1743	1776.33	3725	2888.33	8978	9383.33	0	muscle_CE
Cdk17		4797	5826	2139.33	2438.67	1431.17	1666.83	1922.8	1881	2233	2136.67	773	567.667	672.333	708.333	639.667	950	644.667	962.667	1753.67	1691.33	269	438.667	0	Brain_CE
Cdk18		487	506.333	920	1071	33.8333	48	2301.8	2104.2	45.6667	41.6667	1373.67	1173.67	503	436.667	85	83.6667	30.3333	31.3333	82	94.3333	327.333	366	0	Spinalcord_RT
Cdk19		1435	1769.67	747	847.667	2355.33	2610.5	2688.2	2367.6	1435.33	1304	870.333	675.667	170.667	213	464	505.333	590	476.333	394	370.667	2346.67	2252.67	0	Spinalcord_RT
Cdk2		44	43	50.3333	62.3333	2899.33	3288.17	113.8	96.8	917.333	1084	704.667	607.667	200.667	242.333	371	385	379	403	406	262	196.333	220	0	Bonemarrow_CE
Cdk20		167.5	185.333	183.667	212	99.3333	130.333	284.6	267	89	104	53.3333	45.3333	127.667	131	86	124	130.667	115.667	79.6667	105.667	158.333	263.667	0	Spinalcord_RT
Cdk2ap1		75	77.6667	111.333	123.333	105.333	128.333	178	195	103.333	120.333	94.6667	100	35	33	62.3333	128.333	80	96.3333	79	91.6667	1407	1342	0	muscle_RT
Cdk2ap2		386.5	407.667	219	234.667	2230.33	2443.5	408.2	377.6	1227.67	1257.67	1166	1219	682.333	917.667	515.333	761	684.333	673.667	782.333	996.667	564	689	0	Bonemarrow_CE
Cdk4		795.5	815.667	752	866.667	2927.67	3721.33	1075.4	1042.4	1820.67	2181	1639	1422.33	450	625	618.333	1277	773.333	620	958.333	722.667	1181.67	1283	0	Bonemarrow_CE
Cdk5		1714.5	1911.33	1301.33	1514.33	418.5	458.333	3239.6	3127.6	374	360.667	433.667	397	260	336.333	338.333	600.667	405	500.333	817.667	693.667	603	786	0	Spinalcord_RT
Cdk5r1		4592	5621.33	2338.67	2736.33	291.167	315.5	2204.2	2211	155.667	160.333	119.667	74.6667	15	15.6667	58	51.6667	42.6667	39	32.3333	15.6667	12.3333	18	0	Brain_CE
Cdk5rap1		184.5	263.667	235.333	258.333	193	231.667	208.8	216.6	230.333	268.333	341.667	295.667	200.667	215.333	215.333	296.667	201.333	231	341.667	403	569.667	631.667	0	muscle_CE
Cdk5rap2		727.5	829	1019.33	1184.33	1185.5	1419.33	1801.2	1700.8	1618	1462	1031.67	808	272	250	331.333	554.333	490.667	469	339	291.333	726.333	752.667	0	Spinalcord_RT
Cdk5rap3		436	474.667	349	461.333	728.333	836.333	938.2	880	505.333	523.667	835	811.667	923	1122.33	588.333	652.667	537	393.667	406	351	1119	1277.67	0	muscle_CE
Cdk7		1277	1552.33	1554	1794.67	633.833	789.833	1979.6	1749.6	820.333	815.333	825	724	406	441.333	728	1080.33	681.333	676.667	790.667	760	712	918.333	0	Spinalcord_RT
Cdk8		802	807	727.667	819.667	578.333	683.5	456.4	428.4	881.667	844.333	1382.67	1090	527.667	604.667	718.333	1180.33	544.667	692	719	721	579	851	0	Ileum_RT
Cdk9		651	754.333	627	728.333	1576.67	1749.83	1298.8	1328.6	693.333	733.667	563.333	480	316.667	358.333	365.667	427	420	419.333	363.667	405.667	904.333	1162.67	0	Bonemarrow_CE
Cdkal1		454.5	458.667	478	565.333	198.667	225	387	373.6	778.333	712	657	553.333	398.667	403	435.333	595.667	510.333	586.667	622.333	589.667	1131.67	1178	0	muscle_CE
Cdkl2		586.5	730.333	818	940.333	12	12.5	1040	948.4	55	46.6667	199.667	199.667	125	122.667	464	385.333	326	315.333	217	273.667	243.667	336	0	Spinalcord_RT
Cdkl3		188.5	209.333	338	408.333	48.5	55.6667	353	350	125.333	111.333	82.3333	63.3333	8	13	179	229	135.667	180	214.667	212.667	81.3333	113	0	Hypothalamus_RT
Cdkl5		4156	5270.33	1669.33	1919.67	16.1667	20.1667	495.4	461.8	132	112.333	201.667	144	214	213.667	155.667	159.667	120.667	123.333	247.667	185.667	15.3333	25.6667	0	Brain_CE
Cdkn1a		135	182	48.3333	43.3333	205	226.5	986.8	931.2	47	47.3333	1401.67	1070.67	96.3333	51	118.667	201.333	100.333	170.333	319	390.333	809.667	1131.33	0	Ileum_RT
Cdkn1b		924	1125	858.667	1015.67	2133.83	2596	783.8	816.2	2695	2528.67	1650	1348.67	356.667	418.667	807.667	1024.33	802.667	893.667	800.667	645.667	1059	1250	0	Spleen_CE
Cdkn1c		155	193	114.667	116	26.1667	37.3333	589	494.4	50.3333	49	63	70	13.6667	19	208.667	185.333	246.333	99.6667	616.667	488.667	951.333	836.667	0	muscle_RT
Cdkn2aip		334.5	468	333.667	398.667	560	718.667	381.8	382	561	525	636.667	601.333	317	381.333	306.333	443.667	272.667	325	316	287	270.333	355.333	0	Bonemarrow_CE
Cdkn2aipnl		842	994.333	558	674.667	1192	1443.67	1600.4	1518.2	879.667	867	739.333	691	192.667	217	289	514.333	337	334.667	217	218.333	1584	1584	0	Spinalcord_RT
Cdkn2c		58.5	51.3333	18.3333	18	1242	1591.67	30.6	31.2	595.333	794.333	311	317.667	103	92.6667	3670.33	2719.67	2873.67	2463	1962	918.667	313.333	520.667	0	VAT_RT
Cdkn2d		639	755	429.667	494	2964.33	3615.5	1064.4	1132.4	488.333	568.333	132.333	130.333	29.6667	30.3333	69.3333	83	94.3333	90.3333	105	129.333	476.667	539	0	Bonemarrow_CE
Cdnf		30.5	29	23	24	16.5	24	69.8	74.2	17.6667	11.6667	27	11.3333	13.3333	11	84	113	107.667	113.333	308	329.333	3244	3772.67	0	muscle_CE
Cdo1		414.5	461	411.333	497.667	18.6667	18.8333	532.8	505	105	79	567.667	838.333	17418.3	23152.7	23083.3	33897.3	18121.3	27669.3	29251.3	23869.3	708.667	3551.67	0	VAT_CE
Cdon		266	286	259	301.667	59.8333	77.1667	539.2	446.6	675.667	589	643	528.667	61	66.6667	1232.33	1847.33	1515.67	932	798.667	531	1336.33	1883.67	0	muscle_CE
Cdpf1		201	179.667	107.667	131.333	153.333	203.833	258.2	237.6	182.333	206.333	255.333	260	110.333	128.667	212.667	311.333	221.333	221	216.667	348.333	793.333	1012	0	muscle_CE
Cdr2		548.5	595.333	414	454.667	6408.67	9331.17	2529.6	2605.4	2264	2836.67	567	823	20	26.3333	788	859.333	450.333	490.667	140.667	159.667	182	297.333	0	Bonemarrow_CE
Cdr2l		828	944.667	553.333	643.667	33.5	50.5	1951.2	2020.6	221.667	225.333	81	72.3333	67.3333	76.3333	131.667	169.333	230.667	145	114.667	113.333	116.667	165.667	0	Spinalcord_CE
Cds1		2034.5	2357.33	771.333	1008	157	151	4226.6	4222	75.6667	93.6667	6503.33	5635.67	9.66667	9	402.333	1175.67	211	282.667	584	570.667	80.3333	166	0	Ileum_RT
Cds2		13699	16422	16556.7	19095.7	5611.5	5792.5	17422.4	16559.6	3388.67	3405.33	2746	2291.67	2418.67	2589	1940.33	2216.33	2324.67	1580.33	2208.67	2080.33	2412.33	3175.67	0	Hypothalamus_RT
Cdt1		44	52.3333	28.3333	38	2338	3224.17	93.6	93.6	886.333	1242.33	433.333	321.667	67.6667	54	30.3333	37.6667	83	70	18.6667	21	21.3333	17	0	Bonemarrow_CE
Cdv3		519.5	650.333	741.333	902	1211.17	1433.33	1135.4	1040.2	1360	1429.33	1619	1456.67	838	979.333	656.333	961.333	694.667	890.333	1400.33	1319	9515.67	10451.3	0	muscle_CE
Cdyl		3899	3282	713	833.667	780.667	1036.17	190.8	195.4	568.667	619	344.333	309.667	107	124.667	237	520.667	302	284	258.333	231.333	185.667	292.667	0	Brain_RT
Cdyl2		305.5	381.333	272.333	295	352.5	392.833	530.2	500	288.667	278	60	42.3333	27.6667	25.6667	104	113	143	110.667	74	59.3333	161.333	270.333	0	Spinalcord_RT
Ceacam1		20	42.3333	90.6667	92	2880	2728.83	157.6	127.2	365.333	357.667	20495.3	16069.3	1536.67	1300	105.333	113.667	122	186.333	161.333	181	259.667	301.333	0	Ileum_RT
Cebpa		184.5	229.667	89	78	1061.33	1084	234.2	246.8	452.333	478	979.333	1166.33	5985.33	7418.67	8358.33	7714	12372	7572	15697	8043	449	1102.33	0	BAT_RT
Cebpb	marker_Ther	45.5	53.3333	28.6667	37	452	413.5	49.8	52.6	203.667	258.333	113	127.667	575	568.667	162.667	441.333	432.333	678	3155	2013	362	488.333	0	BAT_RT
Cebpg		603.5	738	815	923.667	1841.33	2197.5	1215.4	1210.4	1431.33	1359.33	2800.67	2814.67	1112	1265.67	1913.33	1846	1926.33	2172.33	2328.67	2935.33	2288.67	4065	0	muscle_CE
Cebpz		848.5	903	699.667	815.667	1258	1461.33	1057.2	1076.6	1578.33	1495	994.333	824.667	801	940.333	563.667	775	674.333	630.333	1026.33	844.333	1445.67	1771	0	muscle_CE
Cecr2		115	163.333	264	268.333	1975.67	3374.83	233.2	242.4	782.333	679	75.3333	41.3333	728.667	684.333	378.667	428.333	479.333	575.667	1220	720	914.667	861	0	Bonemarrow_CE
Cecr5		368.5	400.333	781.667	839.333	279.667	378.333	848.2	805.6	749.667	717.333	428	357.667	468	533.667	294.333	501	388	474.333	724.333	614	1035.33	1252.67	0	muscle_CE
Cela1		43.5	38	10.6667	17.3333	349.5	515.167	255.6	222.6	3117	1515.67	79	91.3333	373	427	121.667	166.333	144.333	184	24.6667	124	3857	26.3333	0	muscle_RT
Celf1		2468	3350	2595	2834	4986.83	6127.17	2631.8	2537.6	3140.67	3022.33	4223.33	3449.33	2168	2014	1758.33	1939.33	1624	1814.33	2186	2039	4468.33	5395.67	0	Bonemarrow_CE
Celf2		3095	4080.67	2534.67	2677	3462.83	3837.67	2481.4	2243	4198.33	3432	1143	606.667	312.667	264.333	4563.33	3422	3767.33	3497.67	3207.33	2557.33	3600	3706.33	0	VAT_RT
Celsr1		170.5	215	323	350.333	253.333	319	141.8	137.2	464	459.333	1201.33	910.333	700.333	661.667	351.333	400	125.333	127	32	25.3333	10.3333	8.33333	0	Ileum_RT
Celsr2		3951.5	4893.33	3217.67	3351.67	86.6667	124.333	6701.8	6808.4	59	39.3333	144.333	113.333	21.3333	18.6667	276.333	506.667	1127	294.667	276	123	920.333	1150.67	0	Spinalcord_CE
Cenpa		23.5	29.3333	11	15.6667	2885.83	3589	22	25	1210	1533	876	771.333	116.333	106.667	87.3333	84	124.333	168.667	179.333	184.667	73	92.3333	0	Bonemarrow_CE
Cenpb		3718.5	3623.33	1187	1427.67	1724.83	2053	5054.6	4810.2	1495	1621.67	2762.33	2564.33	1221.67	1523.67	2643.33	2612.33	3879	3060.33	4911.67	5559	10946	10209.3	0	muscle_RT
Cenpc1		646	675	690.333	863.333	1078.33	1352	760.4	704.2	716.667	679.667	735.333	615	104.333	128	367.667	532	303	291.667	236.667	214	218.667	300.667	0	Bonemarrow_CE
Cenpe		29	40	20.3333	28.3333	4843.17	5795.5	58.2	61.2	1344.67	1804.33	1950	1875.67	37.3333	22	69.6667	87	67.3333	75	18	30.6667	7.66667	15.6667	0	Bonemarrow_CE
Cenpj		80.5	77	72.3333	85.3333	712.833	787.167	164	151	365.667	340.667	291	256.667	86.6667	80.3333	151.333	191.667	165.333	167.333	100	106	134.333	208	0	Bonemarrow_CE
Cenpk		18.5	14.3333	6.66667	10	553.167	742.667	21.8	20.4	163	220.667	125	106	13	14.3333	35.3333	32.6667	18	33.6667	22	25.3333	11.6667	27.6667	0	Bonemarrow_CE
Cenpl		26.5	35.3333	27.3333	32.6667	1287	1626.33	88.2	80.4	259.667	334.667	345.333	309.333	94.3333	93	54.3333	56.3333	46.3333	60.6667	30.3333	22	30.3333	33.6667	0	Bonemarrow_CE
Cenpn		24.5	20	32.6667	42.6667	748.5	945.833	56	50.4	210	278.333	123.333	108	16.3333	14	36.3333	39.6667	21.3333	28.3333	24	43.3333	27	31.6667	0	Bonemarrow_CE
Cenpo		89	87.6667	189.667	236	512.5	609.5	176	160.2	513	544	377	302.333	86.6667	95	141	277.333	203.333	208.667	378.333	174.333	85.6667	135.667	0	Bonemarrow_CE
Cenpp		15.5	18.3333	24	34	352.833	451	28.6	31.4	114.667	163.667	132	103	6.66667	8.33333	31.6667	40.3333	31.6667	37	31.3333	18	23.6667	29.3333	0	Bonemarrow_CE
Cenpq		85	99	54.6667	71.3333	720	884	194.6	185.4	408.667	401.667	200.667	183.667	57.3333	51.3333	40.3333	91.6667	57.3333	94	48.6667	55.6667	122	179.667	0	Bonemarrow_CE
Cenpt		211.5	229	268.667	302.333	595.667	736	280.2	261	266	262.333	236.667	204.333	35.6667	38.6667	109	161.667	89.3333	92	46	38.3333	81	102	0	Bonemarrow_CE
Cenpv		274.5	316.667	228.333	262.333	158.667	246	273.2	267.2	148.667	204	689.333	644.667	217.333	263.667	296.333	313.667	331.333	303.333	529.333	410.667	396.333	531.333	0	Ileum_RT
Cenpw		36.5	38.3333	16	17.3333	178	236.167	19.2	19.4	77.3333	107.333	103.333	114	17	16	29.3333	46	13.3333	26	12	11.6667	28	34	0	Bonemarrow_CE
Cep104		495	585.333	460.667	560	492	641.667	1054.8	1029	425	424	490.667	438.333	217	194	457	456.667	478.333	351.333	542.667	488.333	2555	2722.33	0	muscle_CE
Cep112		692.5	617	592.667	705.667	9.66667	9.5	76.4	65.8	32.3333	29.3333	64	48.6667	10	9.33333	152.667	176	126.333	90.3333	54.3333	42.6667	45.3333	79.6667	0	Hypothalamus_RT
Cep120		1231	1536.33	1369	1598.33	1206.83	1440.5	2463.6	2384.2	1345.33	1238.33	804	585.667	394.667	375.667	666.333	738.333	784	562	688.333	518	1296.33	1524.67	0	Spinalcord_RT
Cep128		185	210.667	134.667	166	1489.33	1754.17	175.8	202.8	756.333	894	430	367.333	67	55.6667	385.333	428.667	283.333	304.667	135.333	124	47.6667	71.3333	0	Bonemarrow_CE
Cep135		222.5	296	454.667	543.333	850.167	1052.83	495.2	473.2	948	901.667	550	438.333	209.333	210	239.667	343.667	262.333	299	202.333	223	94.3333	128.667	0	Bonemarrow_CE
Cep152		83.5	116.667	166.333	185	916.5	1143.83	219	227.4	757.333	775	567.667	450.333	110.333	113.333	163	226.333	188.333	218.333	135.333	170.333	122.667	196.333	0	Bonemarrow_CE
Cep164		435	460	828.333	965.667	1429	1886.33	839.2	804.2	843	939	858.667	639	435	390.667	431.667	814	440	334	248.333	262.667	228	305	0	Bonemarrow_CE
Cep170		2119.5	2747.33	3999.67	4682	1620.83	1848.83	3138.4	2949.4	2430	2153.33	625	429	334	373	1989.33	1766.33	2253.67	1932.33	1201.67	808	775	1113.33	0	Hypothalamus_RT
Cep170b		4765.5	5452	4589	5524	62.3333	87.1667	6704.8	6935.2	251.667	235.667	2917.33	2534.33	984.333	915.667	438.333	839.333	252	169.333	225	211.667	927.333	1165	0	Spinalcord_CE
Cep19		1156	1389.67	655.667	813.333	654.833	583.167	1125.8	1145.8	123	131.333	442	412.667	83.3333	106.333	123.667	218	140.667	115	196.333	186.333	614	735.333	0	Brain_CE
Cep192		210	273	505.667	554	2584.5	3121.17	537.2	509.6	2340.33	2336.67	1680	1326.33	174.333	181.667	577	902.333	715.667	681	528	524.333	128	202.667	0	Bonemarrow_CE
Cep250		525	612	1499.33	1773	2099.5	2332	2160.8	2260.2	1614.67	1528.33	1089.33	790	327.667	325	687.667	1040.33	963	846	520.333	430.667	596.667	799.667	0	Bonemarrow_CE
Cep290		754	812.333	1162.67	1440	443.167	607.5	860.2	873.8	537.333	602.333	644	612.333	188.333	184.333	423.667	651	298	318.333	304.667	305.667	187.667	233.333	0	Hypothalamus_RT
Cep350		1790.5	2254.67	4005	4675.33	3890.17	4300.83	2733.8	2808	4740	4249.67	7096.67	6030	2112.67	1947.33	2222.33	2860.67	2503.67	2443.67	2669.67	2283	3140.67	4342.33	0	Ileum_RT
Cep44		174	192.333	264.667	292.667	321.5	386	221	213.2	341.667	348.333	335	290.333	277.667	306.333	202	308.333	142	224.333	170.333	170.333	228.333	281.667	0	Bonemarrow_CE
Cep57		307	334.667	374.667	466.333	1094.5	1399.67	461.8	419.4	961.333	936	709.667	545	230.333	234.667	346	550.667	360.333	395.667	370.333	291.333	211.667	350.333	0	Bonemarrow_CE
Cep57l1		121.5	123	129.333	151.333	307	404.667	138.8	137	323.333	327	202	162.333	121.667	101.333	121.333	167.667	128.667	150	104.667	101.333	117	148.333	0	Bonemarrow_CE
Cep63		398.5	475.667	627	764.667	487.833	552.833	751.4	727.2	855.333	793	618.667	497	213.333	244.333	372.667	879	443.333	536.333	772.333	783.333	906.667	1057.67	0	muscle_CE
Cep68		523.5	694.333	709.667	818.667	584.833	708	872.6	809.4	1369.67	1195.33	740.667	534.667	383.333	360	635.333	791.667	718.667	788.333	1247.33	957	2273	2665.67	0	muscle_CE
Cep70		274.5	307	663.667	799	656.667	836.333	589.8	529.6	547.667	594.667	454.333	366	90	99.6667	426.667	802	420.667	523.667	279.333	250	87.3333	138.667	0	Bonemarrow_CE
Cep76		653.5	701.333	142.667	147	1801.17	2513.83	256.8	275.6	612.667	838	268.333	273.333	154.667	148.667	143.667	230.333	152.667	182.333	166.333	178	402	482	0	Bonemarrow_CE
Cep78		191.5	244	249	314.333	329.167	428.333	341.2	315.8	251.333	247.333	185	141.333	74	66	186.667	272.333	165.667	184	170	168.667	146	206.333	0	Bonemarrow_CE
Cep85		284.5	366.333	315.667	361.333	1218	1568.83	453.6	421.8	683.667	773.333	449.333	347.333	735.333	1001	212	528.667	242	269.333	517.667	347.333	3734.33	4742.33	0	muscle_CE
Cep85l		511	745	965.333	998.333	260.5	283.667	398.6	382.4	535	479.333	244	147.333	1033.33	910.667	828	883.667	699.333	886.333	1093	949	990.333	844.667	0	BAT_RT
Cep89		170.5	202	361.667	431.667	568.333	756.333	364.2	355.2	365	370.333	452.333	369	118	111.667	249.333	323	213.667	172.333	182.333	157.667	397	401.333	0	Bonemarrow_CE
Cep95		187.5	213.333	366.333	440.667	566.667	684.167	409.8	387.4	657.333	577.667	458.667	454	138.667	155.333	289	454.667	331.333	438.667	363.333	320.667	275	411	0	Bonemarrow_CE
Cep97		487.5	574	839	913.667	415.667	542.167	1263.4	1257.8	758.333	694.667	284.667	203	155.333	145.333	281.333	373	274	281	224	144.333	312	490	0	Spinalcord_RT
Cept1		1612	1580	1023	1180.67	979.5	1011	1402.6	1227.8	1616.33	1411	2488	2238	1181.33	1417.33	1081	1365.33	948.333	1124.33	888	744.333	910.333	973.333	0	Ileum_RT
Cercam		83.5	82.3333	190.333	244.333	542.167	781.167	633.4	530.2	203	316.667	67.3333	41	7.66667	7.66667	147.667	167.667	207.667	88.6667	68.6667	52.3333	174.333	226.667	0	Bonemarrow_CE
Cerk		2757	3197.33	1188.33	1325.67	2764.83	3427.83	4137.8	4294.2	3043.67	3002.67	1272.67	1081	125	141.333	549.667	549.333	782	629.333	310	406	421	611.333	0	Spinalcord_CE
Cers2		1228	1304.33	1185.33	1454.67	3047.17	3461.83	5392.4	4314.4	2140	2193	2313.67	2157.67	5601.67	6474.67	2248.33	2912.67	2197.67	2081.33	3480.33	2718	1087.33	1674.33	0	Liver_CE
Cers4		847.5	918.333	2332.67	2643	155.333	188	1588.4	1466.4	684.333	590	475	395	61	68.3333	861.667	889.333	513.667	489	288.667	279	188.667	284.667	0	Hypothalamus_RT
Cers5		858.5	960	841.667	990.667	663.833	715.333	1237.8	1090.8	810	734.667	657.333	589	52	54.6667	798	1195.33	791	694	620.667	454.333	290.667	433	0	Spinalcord_RT
Cers6		1261.5	1616	1027.33	1135.33	1235.83	1236.17	429	435.6	644	690	7903	6231	248	290.667	1140.67	1746	728.667	392	89.3333	82	26.3333	58	0	Ileum_RT
Cetn2		566.5	616	533.333	653.667	537.333	662.833	716.6	702	510	498	376	369	161.667	203.333	356.667	599.667	342.333	446.667	369.667	378.333	805.333	937	0	muscle_CE
Cetn3		722.5	704.667	536.333	652	898.167	1056.67	1015.4	948.6	682.333	632.333	609.333	550	212.667	288.667	611.667	941.667	549.333	676.333	588.667	560.667	498	754	0	Bonemarrow_CE
Cfb		33	46	111.667	116.333	131.167	148.167	41.2	25.8	2273	2002	3756.33	3473.67	23872.7	32490	2629.33	2571.33	4775.33	2220	432	311.667	451.667	910.667	0	Liver_CE
Cfdp1		1605.5	1677	1383	1681	941.667	1196.5	2125.4	2136.4	949	968.667	971	976	512	758	546.667	943.667	718.333	791	965	902	762	1017	0	Spinalcord_CE
Cfh		569	662	500.667	586	359.667	425.833	1042	868.2	560	487.333	347	327.333	15720	20612.7	2749.33	3708.67	2078	1891.67	474.333	403.667	616.333	1196.67	0	Liver_CE
Cfl1		5223	6050.67	2646.67	3259.33	10714.5	11926.2	8897	9071.8	5083.33	4961	5028.33	4935	1076	1276.67	1590	1894.67	1549.67	1259.67	1121	1131.33	1876.67	2682.67	0	Bonemarrow_CE
Cfl2		1553	1828.67	1543.67	1896	356.667	404	3556	3244.2	591.667	517.667	1098.67	846	859.333	959.667	1652.33	1811.67	1441	1967.67	3041.67	2873	12133.7	13491	0	muscle_CE
Cflar		408	503	530	563.667	2002.17	2048	661.2	670.6	3404.67	2936.33	3517.67	3171.67	2232	2259.33	2880.33	2716.67	2871.33	2897.67	2029.67	2200.67	1448.33	2133.67	0	Ileum_RT
Cfp		47	48.6667	198	187.667	2998.83	3232	279.4	324.2	4135.33	4218	232	170.333	308.333	389.333	604.667	565	1161.33	727.667	212.667	203	511.667	817.333	0	Spleen_RT
Cggbp1		1229	1638.33	1502	1699.33	3372.17	3918	1588.2	1585	3005.67	2712	3045.67	2759.33	1099.33	1234.33	1777	2431.67	1563.33	1952.33	1832.33	1897.33	776.333	1156	0	Bonemarrow_CE
Cgnl1		845.5	940.333	607.667	763.333	63.6667	86.6667	4181.8	4035.6	844.333	685.667	305.333	248.667	2333.67	2435	2163.67	2648.67	3442.33	2443.33	7042.67	5333	458.667	905.333	0	BAT_RT
Cgrrf1		448.5	485.667	415	432.333	339.5	409.333	712.6	769.2	248.333	259.333	395.667	400.333	533	602.667	353.667	555.667	381.333	725.667	863.667	1156	1950.33	2270	0	muscle_CE
Chac1		191.5	181.667	110	137.667	75.3333	72.3333	235.6	220.8	12.6667	19.6667	42.6667	48.6667	44.3333	54.6667	61.6667	66.6667	72.3333	37	66.6667	52.6667	4713	1650	0	muscle_RT
Chac2		162.5	203	142.667	151	637.667	821.5	169	168.6	252	287.333	164.333	146.333	316	382.667	107	168.333	104	165.333	202.333	178	404.667	535.667	0	Bonemarrow_CE
Chaf1a		46	65.3333	39.6667	61	2211.17	2733	177.8	159.2	361.333	506.333	334	305.667	40	35.6667	48	81	54.3333	40	32	31	107.333	119	0	Bonemarrow_CE
Chchd1		606.5	583	378.667	467	446.333	584.833	718.8	694.4	456	436.333	467.333	534	368.667	459.333	469.333	727	521	827	1227.33	1225.67	3295.67	4016	0	muscle_CE
Chchd10		2513.5	2760.33	989.333	1216	655.167	1072.5	3197.2	3374.8	278.333	278.667	713	710.667	4781	5226.67	291.333	1002	745.667	2484.33	8003	11098	26790.3	23644.3	0	muscle_RT
Chchd2		2381.5	2452.33	1429	1609	1130.67	1354.17	2283.4	2325.2	957.333	1068	2383.33	2382.67	2471.67	3012.33	2545.67	3168	2629.33	4667.33	6726	8474.67	9287.33	11459.7	0	muscle_CE
Chchd3		1213.5	1296.67	781.333	932.333	999	1263.17	1927	1842.2	1145	1224.33	2586.67	2603.67	1606.67	1850.67	1308.67	2123.67	1975.67	4361.33	8566	10135	14803.3	15145.3	0	muscle_CE
Chchd4		641	734.333	580	702.333	259.5	295.167	613.2	616.4	289	299	494	540.333	208.667	223	206	337	242	388	787.333	860.667	869	904.667	0	muscle_CE
Chchd5		169.5	167	133.667	155.667	125.5	144.333	303.8	260.6	144.667	134.667	140.333	123.667	141	178	117.667	226.333	137.333	142.333	195.333	233	374	411.333	0	muscle_CE
Chchd6		786	860.333	573.667	638	73.3333	101.167	868.6	860.2	70.3333	66.6667	63.6667	59.6667	39.3333	37.3333	401.333	428.333	441.333	449	581.667	547.333	173	242.333	0	Spinalcord_RT
Chchd7		276.5	328	370.667	416	210.667	246.167	472.4	532.8	245	263.667	887	853.667	196.667	260	199.667	684	202	290	693	662.333	780	874.333	0	Ileum_RT
Chd1		1051.5	1276.67	1342.67	1553.33	2605.33	3020	791.2	797	3590	3535	4214	3881.33	1462	1624.33	1307.33	1922.67	1488.67	1694.33	2147.33	1625	744	1050	0	Ileum_RT
Chd1l		267	289.333	221	264.667	651.333	792.167	429.4	412.4	665.667	725	613.667	476	242.667	270.333	255	434.667	297.333	282	344	333.667	1082.67	1178.33	0	muscle_CE
Chd2		1841.5	2307	3312.33	3922	2606.83	3128.17	2335.8	2137.8	6923	5973.67	4897	3769.33	1609	1759.67	2071.67	3180.67	2388.33	2629	2005	1852.67	3119	4182	0	Spleen_CE
Chd3		8367.5	9892	9423.67	11786.3	1721	2264.5	11106	10666.2	4410	3779	5052.33	4382.33	3105.67	2852.67	838	1625	1453.33	2073.67	2538.33	3459.33	562.333	1056.67	0	Hypothalamus_RT
Chd4		3730	4647	5428	6349.67	9255.83	10962.5	6798.8	6946	8431	8300.67	6027.33	4138.67	3349	3461.33	4712	6751.67	6029.67	5678.33	7925.67	6423.67	7087	8330.33	0	Bonemarrow_CE
Chd6		2759.5	3480.33	5455.67	6378	1324.5	1545.83	4967.6	4766	3423	3033.33	2325.67	1608.33	882.667	897.333	1931.67	2972	1974	1809	1621.33	1292.67	1478.33	1729.33	0	Hypothalamus_RT
Chd7		789	968.333	925.333	1032.67	1503.33	1516.5	951	883	2524.67	2226	2555.33	1927.67	723.667	708.333	915	978	1028.67	1032	962	820.667	2126.33	2691.67	0	muscle_CE
Chd8		1982	2531	3265.33	3663	3083.17	3623.83	3690.4	3515.8	4200.67	3617.67	3394	2550	1293	1190	1580	2040.33	1833.67	1503	1661.33	1235.33	2275	2662	0	Spleen_CE
Chd9		2261.5	2771.33	3889.67	4411.67	1495.33	1872.33	2586.8	2506.6	3643.33	3142	4741.33	3719	1295	1252.33	2152.67	2764	2222	2323	2482	1648.67	1242	1764	0	Ileum_RT
Chdh		125	157	192	212.333	989.5	1024.83	411.8	448.4	66.6667	59.3333	4015	3180.67	4340.67	4441.67	1239.67	1663.33	1455.33	961.667	1744	1600	55.3333	224.667	0	Liver_CE
Chek1		23.5	26.6667	64.3333	73.6667	629.667	773	65.6	57.2	201	267.333	217.667	201	27.6667	19.3333	27.3333	50	22.3333	32.3333	20	14	10.3333	17.3333	0	Bonemarrow_CE
Chek2		31	33.3333	58.3333	56	910.667	1187.83	134.8	132.2	447.333	493.667	370.333	357	49	49.3333	112.333	159.333	80	106	115.333	129	92.3333	122	0	Bonemarrow_CE
Cherp		290.5	348.667	301.667	347	2161.17	2689.67	1696.4	1572.2	506.667	482.667	441.333	360	254.333	178.333	264.333	279.333	271	260	243.333	207.667	1330.67	1423	0	Bonemarrow_CE
Chfr		443	535.667	762	860.333	1825.5	2113.33	1149.2	1082.6	1260.33	1237.33	1516.33	1360.33	420.333	454	539	787.333	547.333	597.333	598.667	489	1040.67	1197	0	Bonemarrow_CE
Chic1		795	1068	2042	2254.67	10.8333	14.6667	1790.8	1735	153	135	1571	1262.33	274.333	257	223.333	400	142	131.333	47	41.3333	13	23.3333	0	Hypothalamus_RT
Chic2		241	299.667	433.667	487.333	403.833	434.167	139.6	128.2	970.667	880.667	740.333	592.333	302.667	349	547	670.667	564	572	479.667	383	209.667	268.667	0	Spleen_CE
Chid1		1343.5	1431	1625.33	1943.67	411	492.333	1638.8	1471.4	668	666.333	1048.33	1018.67	845.333	1013.67	588.333	1411.33	638	632.333	784	1058.33	573.667	717.667	0	Hypothalamus_RT
Chka		743	945	1857.33	1956.67	412.167	430	1475.6	1545.6	1036.33	894.333	3604.67	2591	2224.67	2470.33	738.333	1470	280.667	415.667	353	259.667	90	98.3333	0	Ileum_RT
Chkb		296.5	320	430.667	538.333	34.8333	41.5	25.4	26.2	752.667	774	1479	1520.33	611.333	741.667	456.667	593.333	660.667	1141	3039.33	2366.33	11.6667	16.3333	0	BAT_RT
Chm		1565.5	1763.33	908.333	1057.33	473	503.667	1112.2	983	1029	825	1213	969.333	406.333	466.667	604.667	846.333	530.333	717	615.667	634.333	962	1164	0	Brain_CE
Chml		401	489.333	567.333	637	428.167	461.667	535	488.2	545.333	471.667	595	528.333	82	90	897.333	933	794	863.667	357.667	364	64	140	0	VAT_CE
Chmp1a		1365.5	1435.67	833	964.333	1401.67	1615.17	1778.8	1665.6	1080	1080.67	2233.67	2135.33	718	877	781.333	1230	924.667	874	945	984.667	3474	3823.67	0	muscle_CE
Chmp2a		1352	1359.67	1071.33	1250	1908	2176.17	1982.2	2151.4	1177.33	1241.67	2594.33	2591.33	1040.33	1340.67	1045	1593.33	1192.67	1061	1394.33	1478.33	2635.67	2913.33	0	muscle_CE
Chmp2b		893	1064.67	567	633	597.667	666.167	1564.8	1457	627.333	561.667	3697	3290	426.667	468.333	580	773.333	542.333	541.333	758.667	626	1104	1307.67	0	Ileum_RT
Chmp3		2401	2705.33	1656	1967.67	1877.67	2147.33	4068.6	3904.2	1533	1508	3047.67	2927	1003.33	1247.67	1358	2049	1519.67	1644.33	1900	1847.33	2161.33	2810	0	Spinalcord_RT
Chmp4b		3628.5	4148.67	2552.67	3170.33	3140.17	3335	5939	5855.2	1948	2056	4487.67	4633.33	841.667	1010	1237.67	1875.33	1474.33	1383.33	2039.33	2273.67	5081.33	5445	0	Spinalcord_RT
Chmp5		1893	1957.33	1298	1454.33	1116	1189.17	2629.8	2463.2	953.333	926	2248	2454.67	704	947	1274.33	1762.33	1240	1267.33	1355.33	1338	981.667	1171	0	Spinalcord_RT
Chmp6		634	689.667	386	440	453.667	530	740.8	740	488.333	484	1432.67	1345.33	289	375.667	302.667	540.333	411.333	390.333	520.333	601	1364	1484	0	muscle_CE
Chmp7		1894	2232.67	1618.33	1916.67	747.667	875.5	3242.4	3302	697.333	724.667	943	846	828	1048.67	703.667	939.333	842	823.333	1326.33	1400.33	2926.67	3200	0	Spinalcord_CE
Chn2		2938.5	3212	761.333	943.667	153.167	153.333	1469.2	1372.2	354.667	338	1060.33	933.333	617.333	804.333	113.333	98.3333	85.3333	78.3333	54.6667	41.3333	28.6667	41	0	Brain_CE
Chordc1		1616	2020.33	2082.67	2113	984	1230.33	1892.2	2016.4	1931.33	1494.33	1416.33	1697	811	909.667	976	1644.67	820	1713.33	1309.33	2043.33	1892	2391.33	0	muscle_CE
Chp1		2146	2605	1638	1899.33	2780.83	3002.17	4507.8	4283.4	1094	1167.33	3953	3647.67	3291.67	3874.67	4027.33	4049	4694.33	4315	5933.33	5120.67	4847.67	5853.67	0	BAT_RT
Chp2		21	27	11.6667	13	90.6667	146	44.2	51.2	51.3333	56	3571	3945.33	49	76.6667	242.667	246.667	425.667	330.667	113.333	87	155	272.667	0	Ileum_CE
Chpf		1735.5	1976.67	1434	1685	78.3333	112	2386.2	2492.4	346	371.333	234	200	40.3333	54.3333	368.667	625.667	486	247	326	252.333	294.667	324.667	0	Spinalcord_CE
Chpf2		812	842	1007.67	1227	753.333	888.5	1671.4	1555	771	777	446.667	345.667	378	445	766	1201.67	901.333	807	605.333	501.667	542.667	619.333	0	Spinalcord_RT
Chpt1		1130.5	1288.33	1584.33	1793.67	172	175	2023	1870.8	412	298	2001.67	1792	3090	3472.67	24213	22983.7	19359.7	38927.7	33931	46570	3773.67	6830	0	BAT_CE
Chrac1		199	206	163.333	197	337.5	396.833	280	253.8	443.333	425.333	369.333	340	188.333	227.667	274.667	400.333	301.667	353	447.667	467.333	2018.67	2191.67	0	muscle_CE
Chrdl1		251.5	295.667	55.6667	57.6667	260.667	379.333	147.6	179	92.3333	87.3333	129.667	86.6667	10	9.33333	3606	3218.33	2060.33	840	206.333	167	129.667	211.667	0	VAT_RT
Chrnb1		25	33	103.333	107.667	43	51	30.2	29.2	145	111.667	130	107.333	9	13.3333	120.333	145.667	88.6667	87	94.3333	76.6667	1282.67	1934.33	0	muscle_CE
Chrnb2		1732	2049.67	1947.67	2306.33	35.5	37.1667	1993.2	1897.2	168.667	167.333	145.333	100.333	73.6667	52.6667	53.6667	98.6667	65	112	174.667	162.333	9.66667	20	0	Hypothalamus_RT
Chst11		1019.5	1100.33	935	1077.33	1159.5	1378	1416.6	1292	515.667	540.333	270.667	172	9	5	186.333	210.667	438.667	324.333	933	584	149	220	0	Spinalcord_RT
Chst12		240	246.667	258.667	335.333	2137.83	2128	868.2	806.6	284.667	292.333	94.3333	68.3333	11.6667	11.6667	452	410.333	525.667	363.333	275.333	559	414.333	547.333	0	Bonemarrow_RT
Chst14		37	39.3333	40	41.6667	105.5	134.167	92.6	81.8	125.333	123.667	51	28.3333	28.6667	30.3333	96.6667	110.667	155	77	76.6667	78.3333	139	177.667	0	muscle_CE
Chst15		935.5	1094	284	305	1703.33	1926.67	883.2	800.8	2553.33	2314.33	566.667	405	331	395.667	707.333	433.667	1064.67	688.333	1265.33	780	369	456.667	0	Spleen_CE
Chst2		2211	2501.67	1128.33	1301.33	54.6667	80	2688	2731	202.333	169	100	69	53	60.6667	39.6667	52	75	72	23.3333	17.6667	49.3333	47.3333	0	Spinalcord_CE
Chst3		48.5	54.6667	108	126.333	1825.83	2550	388.6	359.6	3924.67	2789	396	153.667	5.33333	12	28	32	246	399	15.6667	12.6667	51	75	0	Spleen_CE
Chst7		30	38.3333	29.3333	34.6667	11.8333	15.3333	37.6	32	53	57.6667	12.6667	10	17.6667	26.6667	45.6667	53.6667	74.6667	53.6667	45.6667	31.3333	74.6667	85.3333	0	muscle_CE
Chsy1		442.5	549.333	451.667	521.667	1153.67	1262.83	320	317.8	1597	1491.33	345.667	226.667	110.333	124	322.667	382.333	530.333	758	266.333	456.667	136.667	203.667	0	Spleen_CE
Chtf8		1548	1701.33	833	861.667	2371.83	2877.83	1453.6	1384.2	1745	1797	1380.67	1242.67	685	745.333	722.333	1163	904.667	688.333	885.667	793	1200.33	1624	0	Bonemarrow_CE
Chtop		2089	2544.33	1685	2026	2092.5	2573.17	2937.4	2768.8	2396	2175.67	1688.67	1454.33	771.667	904	1011.33	1345	1072.67	1135	1207.67	1034.67	4301.67	4573.67	0	muscle_CE
Chuk		550.5	616.667	1149.67	1286.33	1306.5	1477.5	1316.2	1212.2	1967.33	1784	3484.67	3210.67	3273.67	3790.67	1227.67	1736	1026	1507.33	1492.33	1782.33	627.333	942.333	0	Liver_CE
Churc1		82	96.3333	141.667	166.333	244.167	320.5	442.8	428.6	263.333	238.667	232.333	183.667	107.333	116.667	175.333	234.667	174.667	216.333	305.667	282.667	1481	1827.33	0	muscle_CE
Ciao1		1327.5	1521.33	958.667	1100.67	799	987	1642.4	1600.4	801	828.333	719.667	660.333	702	892	514	728.667	627.667	553.667	1025	1036.33	1966.33	2243.67	0	muscle_CE
Ciapin1		847.5	970.667	692	763.667	744.833	956.667	1327	1357.8	583	571	570.667	490.667	507.667	476.667	206	340.667	239	569.667	1705	1682	1040	1346.33	0	BAT_RT
Cib1		242	267.333	134.333	139.667	1008.33	1153.67	493.2	482	776	766.333	2796.67	2964.67	732.333	798.333	293.333	503.667	290.333	343.667	514.333	474	221.333	299	0	Ileum_CE
Cib2		345.5	383.667	440	532	202.833	164.5	864.8	898.4	50.6667	62.6667	72.3333	62	121.333	119.667	1417.33	1253.67	1770	2405.33	6061	7374.67	6264.33	5968	0	BAT_CE
Cic		1476	1805.33	1651.67	1866.33	4469.83	5053	4175.2	4068.2	1916	1752	1569	1113.33	608	462	995	1254.67	1301.67	940.333	840.667	752.333	1994	2258	0	Bonemarrow_CE
Ciita		19.5	25	121	113.333	439.333	574.167	6.8	7.8	5546.33	4699.33	2265.67	1551	49	60.3333	239	227	764.667	820.667	151	98.6667	36.3333	64.6667	0	Spleen_CE
Cinp		696.5	787	402.333	521	458.667	545.667	495.8	426.4	497.333	541	391	389	299.667	283	369.333	583	382.667	456	502.667	477	710	836.333	0	muscle_CE
Cir1		71.5	73	60	82.6667	167.5	234.333	108.6	106.2	94.3333	109.667	84.3333	80.3333	58.3333	62.3333	92.3333	83.6667	68.6667	71.6667	53.6667	51.3333	361	430	0	muscle_CE
Cirbp		1063.5	1077	1053.67	1468	682.833	789.5	1684	1372	750.667	748	644.333	346.667	213	309	689.333	1078.33	732	446.333	313.667	287.667	1079.33	1123	0	Spinalcord_RT
Cisd1		1432	1644.33	796.667	947.333	307.833	407.333	1876.4	1909.6	194.333	222.667	671.333	758.333	1568	1884	595.333	951.333	782.667	1364	3020.67	3255.67	6052	6900.67	0	muscle_CE
Cisd2		663	759.667	1004.67	1162.67	835.667	1028.33	1313.2	1224.6	1432	1333	1285.33	1010	603.333	656	698	1132.33	632	889.333	974.333	948	1717.67	2276	0	muscle_CE
Cisd3		172	165.333	96.6667	114	30.5	37	307.2	281.8	65.6667	78.3333	811.667	859.333	262.667	261.333	132.333	145.333	191.667	306	1156	1130	1826.67	1930.33	0	muscle_CE
Cish		72.5	76	55.6667	64	191.5	203	127.8	118.6	126	137.667	238.333	195.667	315	386.667	359.667	921.333	518	863.667	352.333	1112.33	2806.67	2530.33	0	muscle_RT
Cit		2148.5	2729	2403.67	2556.33	2165.33	2490.33	3402	3728.2	778.667	1110.33	713.667	558.667	39.6667	37	58.3333	73	65	50.6667	36	41.6667	17.6667	33	0	Spinalcord_CE
Cited2		236	305	191.667	185.333	1265.67	1265.5	459.8	502.4	283.667	273.667	552	477.667	282	213.667	484	350	372	221.667	107	100.667	1508.67	1872.67	0	muscle_CE
Cited4		86	84.6667	40	52.6667	342.167	465	21.6	21.8	110	207.333	46	39.3333	6.66667	5.33333	55.3333	502	16	11.6667	21	16.6667	1326.67	916.333	0	muscle_RT
Ciz1		387	480.667	667.333	795.667	1427.83	1662.5	1234	1200.6	972.667	918	1208	938.667	314.667	284.333	527	737.333	606.667	620.667	542	489	1534	1688.33	0	muscle_CE
Ckap4		447.5	502.333	351.333	426.333	6179.33	5798.33	913.4	864.4	418.667	451.333	733.333	587.333	50.3333	63	238.333	338.667	359.667	137.333	118.667	116	575	745.667	0	Bonemarrow_RT
Ckap5		6755	7941	5670	6567.67	5756.33	6935	6921.8	6723.6	3328	3637	3808.33	3319	753.333	815	1100	1710.67	1353	1088.67	1531.67	1442.67	2724.67	2963.33	0	Brain_CE
Ckb		26339.5	27698.3	10332.3	12137.3	194.167	316.333	35495.4	36645.6	720.667	719.333	760.333	629.667	71.3333	91.3333	748	966	513	312.667	407.333	927.667	404.333	624.333	0	Spinalcord_CE
Cklf		39.5	43.6667	123	141.333	339.333	318.833	59.6	51	716.333	617.333	172.333	126.333	20.3333	22	134.667	226.667	141	195.333	41.3333	31.6667	13.3333	21	0	Spleen_CE
Cks1b		23.5	22.6667	15.3333	22	1099.5	1352.83	35	30.4	253.667	356.333	163.667	164.333	46	54.6667	201	205.667	130.333	101.333	38.6667	56.3333	62.3333	115	0	Bonemarrow_CE
Clasp1		2522.5	3289	3772	4362	1822	2360.67	5291.6	5220.2	2644.33	2306	2068	1674	776	695.667	1221.33	1607	1303.33	1191.33	1441.67	1355.67	3432	3711.67	0	Spinalcord_RT
Clasp2		7175.5	8580.33	8568.67	10114.7	1105.33	1359.5	12547.4	11908.8	2653.33	2671	1597.67	1253.67	483	556.333	1469	1772.67	1800.67	1635	2809.33	1950	3056	3739	0	Spinalcord_RT
Clasrp		387.5	405.667	1194.33	1447.33	740.333	786.667	1974	1869.8	852	816.333	1018.33	878	202	206.667	503.667	647.667	585.667	699.333	557	449.667	510	595.333	0	Spinalcord_RT
Clcc1		482.5	528	456.333	562.333	726.667	862.833	870.8	866	682	697.667	738.667	620	748	956.667	471.667	671	579.333	482	601	470	1694.67	1893.33	0	muscle_CE
Clcf1		7.5	9.66667	28	29.6667	98.3333	120.833	37.6	33.8	749.667	687.333	106	47	15.3333	18.3333	62.6667	63.6667	101	140	23.6667	15.6667	11	16.6667	0	Spleen_CE
Clcn2		757.5	843.333	784.333	950.333	475.5	603.5	2013.8	1873.4	210	365.333	2684.33	2294	797.333	968.667	171.667	222.333	176.333	101	97.6667	54	111	118.333	0	Ileum_RT
Clcn3		5302.5	6356.33	4798	5804.67	4640.17	6470.67	6914.2	6534.6	3646.67	3891	5931.33	5146.67	1591.33	1681.67	1212.67	2103.33	1060	1216	1906.33	1918.67	2629.67	3155	0	Spinalcord_RT
Clcn5		535.5	725.333	1452.33	1667.33	140.667	164.833	682.6	703	429	381.333	1707.33	1424	263.333	260.667	382.667	2129	461.667	301.333	269	227.667	43.3333	102.333	0	VAT_CE
Clcn6		1725.5	1916.67	2494	2869.33	171.167	203.833	3041.4	2979.6	397.667	336.333	183.667	141	131	115	266.333	402	303	328.667	293	359.667	303	318	0	Spinalcord_RT
Clcn7		1202	1375	1249	1457.67	1161.83	1407.5	2018.4	1846	945.667	980	813.333	637.667	813	973.333	794.667	1720.33	822.667	622.667	792.333	778.667	1484.33	1762	0	Spinalcord_RT
Cldn1		59.5	89.3333	30	34.3333	463	436.167	117.6	105	18.6667	15	17.3333	10.3333	2191	2341.33	74.3333	381.333	41	37	253	93.3333	91.3333	132.333	0	Liver_CE
Cldn12		1009.5	1326.67	838.333	946.667	85.6667	99.3333	1118.2	1124.6	128.333	111.667	1204.33	1067.33	1752	1932.67	443.333	719	377	465.333	836	776.333	852	1028.67	0	Liver_CE
Cldn5		629	773.667	539	574.333	50	89.3333	1261.8	1312.2	628	568	54.3333	45.3333	60	101.333	697.333	767.333	728	415.667	843	488	533	394.333	0	Spinalcord_CE
Clec11a		131.5	130.333	50.3333	71	40.8333	53.5	54.2	43.2	132.667	106	32	23.6667	33	43.6667	70.6667	215.667	75	56.6667	76.3333	74.3333	84.6667	123.667	0	VAT_CE
Clec14a		84.5	100.333	99.6667	110.667	42.5	74	202.2	186.4	289	226	124.667	102.333	313.333	404.667	251.333	315.333	184.667	206.333	260.333	426.333	212	300.333	0	BAT_CE
Clec16a		1679	2047.33	1249.67	1487	537.333	581.167	2644.2	2617.8	608.333	539.667	878.333	813.333	623.333	575	674	754	766.333	875.333	1392	1506	5617.33	5765.67	0	muscle_CE
Clec1a		31.5	28.3333	28.6667	40.3333	8.66667	11.3333	45	45.2	352	297	78.6667	56.3333	75.6667	81.6667	156	227	209.333	287	187.667	279.667	88	117	0	Spleen_CE
Clec2d		188	193	138	154.333	1152.17	1155.17	158.6	136.2	4468	3943	3916	4763	3659	5243	3003.67	3091.33	4068.67	5168.67	2402.67	2467	1791	2447.67	0	Liver_CE
Clec4a2		5	12.3333	6.33333	6.33333	1725.83	1611.33	20	17.4	189.667	180.333	46	37.3333	8.33333	13.3333	108	89	123.333	139.333	25.3333	25.3333	39	77.6667	0	Bonemarrow_RT
Clec4a3		8.5	18	5.33333	6.66667	465	464.333	21	14.6	397.333	419	49.3333	43.6667	27.3333	36	136	109.667	192.333	173	39.6667	44.3333	39	69.6667	0	Bonemarrow_RT
Clec7a		7	8.33333	8.33333	11.6667	1970.5	1731.33	46	34.2	558.333	643.333	277.667	202.333	52.6667	96.6667	249	226.333	234.333	263.333	57	64.6667	29.3333	55.6667	0	Bonemarrow_RT
Clic1		220.5	242.333	117	137.667	5442.83	5967.67	449.8	392.8	2584.33	2440	2318	2523.67	160.333	248.667	510	830.667	575.333	525.667	250.667	270.667	576.667	899	0	Bonemarrow_CE
Clic4		2612.5	2621.67	1842.33	2324.33	4575.5	6172.67	8089.8	7236.6	3688.67	3953	1418	1211	1504	1668.33	4213.67	3847	5038.33	2877.33	6391.33	4038.33	2510.67	3787	0	Spinalcord_RT
Clic5	marker_Ther	171	188	162	177	39.1667	44.8333	505.4	440.6	2407	2108.33	10404.7	8869	142.667	93	326.667	443	466.333	814.333	6160.33	6481	13288	15451	0	muscle_CE
Clint1		963	1186	963.333	1101	4312.33	4669.5	1910.2	1852.6	2563.33	2608.33	4764.33	4065.33	1410.33	1411	1427.33	2678.67	1231	1060.33	970.333	824	2465.33	2899.67	0	Ileum_RT
Clip1		2881	3458.67	3529.33	4133.67	1656.33	1793	2259.4	2342.2	1754	1720.33	1603.33	1389.67	1351.33	1334.33	1974.33	2121	2214	1748	2391.67	1917.67	19340.7	22565.3	0	muscle_CE
Clip2		3173.5	3519.67	2911	3404.67	444	502.167	5786.8	5839.2	562	555	2798	2348.67	78.3333	103.667	389.333	520.667	575	442.333	669	496.667	305.667	426	0	Spinalcord_CE
Clk1		946	1333.33	2885.33	3135.33	3975	4633.17	2707.6	2829.8	8126.67	7367.33	5416.33	4742.33	1485.67	1950.67	4043.33	6145	3755.67	4975.67	3543	2584.33	1577.33	2452	0	Spleen_CE
Clk2		264.5	320.667	627.333	712.333	1099.17	1238	782.4	734.8	1359.67	1261	873.667	764	292.333	301	576	867	630	771.667	599	488.333	680.333	891.333	0	Spleen_CE
Clk3		797.5	940.333	1145	1309.33	3021.33	3844	1610.2	1591.6	1771	1874.33	1351.33	1379.33	576.333	707	752.333	1174	902.667	1150.67	1071.67	981.667	2367.33	2656.33	0	Bonemarrow_CE
Clk4		508.5	666.333	1355.33	1395	1413.83	1550.5	1517	1574.6	2473	2157.33	1699.67	1409.33	726	897	1269.33	2178	1298.33	1905.33	1441	1289.33	1296.67	1803.33	0	Spleen_CE
Clmn		1137.5	1442.33	1771	2050.67	5	6	3575.2	3291	18.6667	7.33333	1664.33	1027.67	2616.33	1940	1008.67	1357.67	1474.67	683.667	432.333	376	273	443.333	0	Spinalcord_RT
Clmp		511.5	604	472.667	579	48.6667	58.8333	757.4	718	153.667	136.667	704.333	534.333	22	30.3333	587	830.333	747.667	821	151.333	189.333	240	455	0	VAT_CE
Cln3		206.5	201.667	245.333	280.333	1432.67	1303.67	525.6	451.8	582.667	601.667	275.333	246	198.333	227	187	511	306.333	296	309.333	221.333	340.667	383	0	Bonemarrow_RT
Cln5		340	374	294	328.667	1008.33	1039.67	708.2	650.6	675	655	789.667	686.667	521.333	676.667	476	772.333	528	678.667	872	929	748.333	1032	0	Bonemarrow_CE
Cln6		95	111.333	113.333	122.667	695.333	827.5	369.4	307.8	158.667	219	399.667	302.667	36.3333	37.3333	193.667	211.333	169.667	89.3333	136.667	125.333	930.333	922	0	muscle_RT
Cln8		710	858.667	495	528.667	1815.67	2300.5	1310.2	1177.8	898.333	1099.67	1121.67	1087.67	649	656	325	440.667	464.667	394.667	587.667	622.333	972.667	1227	0	Bonemarrow_CE
Clns1a		1465	1596	1040.33	1326	915.5	1045.33	1751.6	1677.2	880.667	844.667	801.333	690	473.667	575.667	390.667	643	458.333	517.667	620	572	1559.67	1654.33	0	Spinalcord_RT
Clock		2470	3088.33	3215.67	3473.67	313.167	352.167	2835.2	2607.4	1785.67	1519.33	4727.67	4609	2651	2513.33	3371	3929.67	2437.33	3493.67	3285	3438	1608.33	2531.33	0	Ileum_RT
Clp1		158	203.667	146.333	148.667	1020	1287.83	204	179	539.333	567	344.667	326.333	246	342.333	157.667	273	187.667	200.333	437.333	249.333	194.667	224	0	Bonemarrow_CE
Clpb		937.5	1092.67	1236.33	1398.67	303	397.667	1356.6	1311	504	478	474	406	844	874.333	805.333	1211	1096.33	1058.33	3197	2514	3964.67	4127	0	muscle_CE
Clpp		973	1017.67	683	847.667	325.333	410	1075.6	1070.2	361	391	416	389	710.667	853.333	559.667	839	596.333	815.667	1715.33	1955	1381.33	1428.33	0	BAT_CE
Clptm1		3190.5	3608.33	2961.33	3653	1987.67	2407.17	5509.2	5041.4	1795.67	1871.33	4002	3658	1888.33	2046	1489.33	2130.33	1762.67	1907	3033.67	3586.67	3883	3827.67	0	Spinalcord_RT
Clptm1l		1686.5	1938	1546	1808	2078.33	2362.17	2685.6	2448.8	2136	2160.33	3109	2802.33	1643.33	1984.33	1424.33	2535.33	1649.67	1591.33	2023	2044.67	1798	2215.33	0	Ileum_RT
Clpx		946.5	959.333	689.333	851	657.667	851.333	1063.2	1016.6	730.667	723.667	1343.67	1150.67	6756	6414	1206.67	1764.67	1262.67	1908	4319	4178.67	3179	4102.67	0	Liver_RT
Clstn1		21507.5	27256.3	14333.3	16969	227.833	297.667	19651.6	20477.4	992	1027.33	4709	3970	102.667	108.333	1291	1929	1273.33	546.667	905.667	991.333	1326	1619.67	0	Brain_CE
Clstn3		11085.5	13038	9997.33	11918	119.667	174.333	13509	13774.2	50.6667	60.6667	20.3333	23.3333	313.333	313.333	233.667	381.667	488	1446.33	6175.67	5173.67	62.3333	343	0	Spinalcord_CE
Clta		3686	4187	2419	2942	2840	3249.83	4945.8	5139.4	2744.33	2974	3275.67	3183.33	1168.67	1556.33	1461.67	2424.33	1894.67	1560.67	1249.67	1521.67	1482	1735	0	Spinalcord_CE
Cltb		3063	3398.67	3008.67	3563	204.833	284.833	5886.8	6136.6	437.333	460.667	2226.33	2313.33	1032.33	1092.33	789.333	893.667	869.667	651	844	901.667	4843.67	4935.33	0	Spinalcord_CE
Cltc		19303.5	24150.7	15142.7	17137.7	12982	15696	25724.2	24900.2	11508	11802.3	26982.7	23545.7	7079.67	7381.33	8057.33	10662.3	9179	7226.33	8612	7677.33	8516.67	10544	0	Ileum_RT
Clu		17223.5	18636	9134	11239.7	1358.83	1712.17	21389.6	20041.2	7107.67	6541.67	1447.33	634.333	21773.3	26913	1487.33	34995.7	983.667	490.333	367.667	224	6062	4955	0	VAT_CE
Cluap1		554.5	634.667	550.667	655.333	301.167	345.667	722.8	717.4	456.667	403.333	309.333	252.667	120	146	261.667	319.333	262.333	256.333	241.333	185.667	518.333	520.667	0	Spinalcord_RT
Cluh		1708.5	1979.67	2696.67	3173.33	1429.83	1784.17	4139.6	4166.8	1493	1618.33	5491	4492.67	8293	8062	6350.67	6805.67	7727.33	8381.33	17007.7	15924	11718.7	13545	0	BAT_RT
Clybl		308.5	312.333	130.667	187	215.333	296.667	623	575.8	100.333	128	196.333	166.667	461.667	509	654.333	614.667	715	1003	2349.33	2691	2160.67	2430	0	BAT_CE
Cmas		1765.5	2089.33	1720	2096.67	3993.5	5280.5	3188.2	3186.4	1706	2137.33	3083.67	2945.33	859.333	995.667	365	552.333	465.667	460	393.667	364.667	1117.67	1224.33	0	Bonemarrow_CE
Cmbl		206	238.667	319.667	374	54.8333	99.3333	471.6	439.6	206.333	234.333	1480.67	1676	2454.33	2987	1240	1129.33	1454.67	1337.67	1334	653.667	2828	2756.33	0	Liver_CE
Cmc1		206.5	226.667	145	198	156.833	175.167	382.8	367.6	164.667	167.667	339.667	291	163.333	191	295.667	385.667	345.333	371.667	597.333	531.333	514.667	615	0	muscle_CE
Cmc2		215	247	148.333	168.333	456.833	559.667	420.6	418.4	173	206	195.333	186	129.667	150	123.667	171	133.333	224	524.667	707.333	847	966.667	0	muscle_CE
Cmip		1780.5	2149.33	2248.33	2526.67	4204	4812.17	5950.2	5818.8	955.667	967.667	2114.33	1553.67	538.333	343.333	552.667	595.667	771.667	498	186.667	177.333	454.333	680	0	Spinalcord_RT
Cmklr1	marker_Ther	54.5	51.6667	41.6667	61	108.333	116.667	196.6	149.2	417	450.667	110.667	91.3333	63.3333	73.6667	1234.33	1451	1776	1192.67	248	310.333	586.667	1022.33	0	SAT_RT
Cmpk1		1211	1472.33	869.667	1044.33	1548	1807.67	1432.6	1384.2	1066.67	978.333	5631.67	5578.67	1129.67	1271.33	1345.67	1627	1176.67	2158	2006.67	2924	726.333	936.667	0	Ileum_RT
Cmpk2		571	686	583	673.333	2262.33	2490.5	1167.8	1141.2	781	975	1078	1060.33	170.333	218.333	115.333	179	262.333	238.333	199	263.333	120	163	0	Bonemarrow_CE
Cmss1		108.5	117.333	72	108	109.333	136.167	175.8	186.6	62.6667	60.3333	61.3333	60.3333	39.3333	45.6667	47.6667	97.3333	55.6667	47.3333	82	68.6667	1812.67	2057.33	0	muscle_CE
Cmtm3		112.5	125	140	181.333	490.833	538.5	340	264.8	699.333	629	142.667	113	68.6667	106	372.333	369.667	570	391	196.333	158	357.667	509.667	0	Spleen_CE
Cmtm4		2697	3508	3806.67	4251.33	195.5	259.5	3533.6	3421.4	799	784.667	5207	4711.33	1532.33	1513.67	1151.33	2126.67	1120.33	1442.33	5824	3891	606	1046.67	0	BAT_RT
Cmtm6		614.5	697.667	481.333	513.333	4589.83	4569.5	1248.4	1187.2	2096	2044	3474	3230.67	2994	3146.67	1846.33	2189.33	2261.67	1478.67	1241.33	1544	663.667	1088.67	0	Bonemarrow_RT
Cmtm7		52	63.6667	35	46.3333	2588.5	2814.5	73.6	73.2	1212.33	1077.67	264.667	179.333	31.3333	49	145.333	181.333	237.667	260	78.6667	63.6667	338.667	320	0	Bonemarrow_CE
Cmtm8		19	20	22	23	13.6667	17	39.6	39.4	28.6667	30.3333	8	5.33333	624.667	717.333	41.6667	97	23.3333	27	53.6667	58	65.6667	81.6667	0	Liver_CE
Cmya5		324.5	380.667	86.3333	102	33.5	33.1667	265.8	225	242.333	186.667	91.6667	58.3333	21	10.6667	108.333	140.333	1242.33	817.667	6579	3166.67	191108	184308	0	muscle_RT
Cnbd2		59	60	105.333	120.333	75.3333	77.6667	169.4	186.8	112.333	87.6667	47.3333	28.6667	8	11	66.6667	79.3333	76.3333	84	63.6667	54.6667	56	78.6667	0	Spinalcord_CE
Cnbp		4287	4569	2867	3455.67	5459.83	6829.83	5895.4	5592.2	5235.33	5104.67	4534	3976	3831	4466.67	3629.67	5313.33	3772	5204	6467.67	5357	23620.7	26330	0	muscle_CE
Cndp2		801	879	426.667	559.333	1413.83	1633.33	1658.8	1641.6	929	1036.67	12458.3	12964	667	713.667	771	1858.67	932.333	641.333	501.333	480.333	1360	1475	0	Ileum_CE
Cnep1r1		321	397.333	378	412	568.667	688.333	776.2	717	446.667	424.667	601.333	542	228.667	223	389.667	492.333	373.333	431.333	424.333	420.667	1512	1755	0	muscle_CE
Cnih4		612.5	735.333	559.667	638	462.833	512.667	1399	1297	429	397.667	972	896	197.667	206	438.333	563	413.667	487	621	607.333	1900	1924.67	0	muscle_CE
Cnksr3		885.5	835.333	100.667	120	157.333	197.5	298.8	261.6	377	372.667	575	504.667	244.667	230.333	256	315.667	281.667	181.333	153.333	98.6667	209	222.667	0	Brain_RT
Cnn2		170	182.333	109.667	114.333	8902.83	9038.33	296.8	267.8	5823.33	5539	1024.33	719.333	92.3333	121	493	558	683.667	623.333	294.333	288.667	424.333	607	0	Bonemarrow_CE
Cnn3		984.5	1144	826.667	942	469.333	702.167	3414	2990	1179	990.667	966	886.667	1302	1580	397.667	521	386	287.333	346	271.667	833.333	1130	0	Spinalcord_RT
Cnnm2		693.5	881.333	874	1025.33	393	525.5	920.8	920.8	311.333	380.667	140.333	143.667	234.667	188.333	1021.67	1077	940.333	828	1501.67	1723.33	142.333	246.667	0	BAT_CE
Cnnm3		305.5	369.333	640	746.667	637.167	744	1142.6	1080	458.667	473.667	428	328	398	350.667	475	488.667	492	374	432.333	345	749.667	851	0	Spinalcord_RT
Cnnm4		219.5	301.333	309	339.667	498.333	459.167	284.2	298.2	324.333	338	7614.67	6434.67	128.333	125.333	103	197.333	154.333	135	200.667	146.333	750.667	922.333	0	Ileum_RT
Cnot1		2906	3759.33	3197	3714	5627.67	6601.17	3231.4	3071.2	6100.33	5657.33	9458.67	7684	3601	3551.33	2703	3657.33	2735.67	2329.67	3126.67	2431.33	4657.67	5377.33	0	Ileum_RT
Cnot10		867.5	1007.33	1270.67	1575.67	904.5	1118.67	1655	1560.2	1141	1099.33	1230	960.333	455.667	502	583	977.333	669.333	654.333	749.667	575.667	1259.67	1316.33	0	Spinalcord_RT
Cnot11		397.5	532.333	387	450.667	707.167	810	647	616.4	607	602.333	569.667	487.667	326.333	349.333	256.333	434.667	302.667	290.667	371.667	413.667	1403.33	1515	0	muscle_CE
Cnot2		1692	1821.33	1364.33	1558	1710.33	2146.33	1483.8	1384.4	2532	2250.33	1810.67	1615.33	731.667	850.667	832	1255.33	979.667	1070.67	1173.33	1029.67	1342	1589	0	Spleen_CE
Cnot3	marker_Ther	222	273.333	460.667	549.667	1464.83	1760.5	849.6	845.4	857.667	857	790.667	724.333	270.333	233.333	415.333	475.333	466.333	498.667	424.333	318	943.333	1136.67	0	Bonemarrow_CE
Cnot4		793	910.333	813.667	942.333	784.667	937.5	927.6	867.8	1166	1044.67	988	802.667	311.667	282	589.667	726	520	703.333	509.333	391.667	1087.33	1310	0	muscle_CE
Cnot6		626	861	846.667	910	2195.17	2651.33	828	750	1750	1766	2658.67	2071.33	834.333	702.667	1001	1667.67	836.667	883.333	522.333	510	352	583.333	0	Ileum_RT
Cnot6l		946.5	1200	1240.67	1302.67	1030.33	1141.17	470.6	433	3187	2713.33	2154.67	1535.33	1084	879.667	1382.67	2079	1102.33	1366.67	924.333	862.333	365	504.667	0	Spleen_CE
Cnot7		1212.5	1447.33	1167.67	1290.33	1052.17	1132.5	1622.4	1435.6	994.667	846	1013.67	808	409.333	440	741.333	1251	563	755.333	893	769	1702	2081.67	0	muscle_CE
Cnot8		912	1042.67	666.667	809	1214.33	1384.5	1229.6	1172.8	924.667	921.667	673.333	612	655.333	787.333	466	687	616	578.667	789	773.667	2046	2300.33	0	muscle_CE
Cnp		10115	9940	5218	6923.33	2672.67	3762.17	34416.2	31107.4	3124.33	2943.33	777.667	628.667	249.667	329	270	334.667	504	406.667	222.333	159	596.667	598.667	0	Spinalcord_RT
Cnppd1		501	515.333	420	454.333	2773	3386.67	1005.8	964.2	1489.33	1540.33	1628.67	1458	816.667	1014.67	610.667	807	757.667	663	957.667	795.333	1222	1439.33	0	Bonemarrow_CE
Cnpy2		546	582	605.333	700.333	589.833	681.167	813.4	788.4	517.333	505	1110.33	1124.33	879	1261	712	1295.33	866	1007.33	1189.33	1132.67	1142.67	1324.67	0	muscle_CE
Cnpy3		1220	1355.67	1038.33	1256.33	1151.83	1177	1819.4	1729	1273.33	1244.67	577.667	441.667	639.333	808.667	577.333	758.333	797.667	542.333	541.667	378	526	645.667	0	Spinalcord_RT
Cnpy4		224	241	245.667	269	486.167	583.5	411.6	431.4	353.667	333.333	245.333	242.333	83.3333	97.3333	209	289	251.333	209.333	166.333	153	173.333	275	0	Bonemarrow_CE
Cnrip1		745.5	949	643	794.667	33.1667	39.1667	1001.2	930	154.667	132.333	42	36.6667	14	15.3333	89.6667	86	113.667	99.3333	44.6667	37.3333	97	133.333	0	Spinalcord_RT
Cnst		1389.5	1704.67	1069.33	1317.33	1439.67	1794	1646.4	1682.4	916.333	935.333	1502.67	1420.33	351.333	292.667	807.667	1320	1074.67	2084.33	3318	5932.33	3268.67	3828.67	0	BAT_CE
Cntd1		6	6.66667	14.6667	13.3333	104	124	26.8	26.8	32.3333	28	30.6667	34	5.33333	5.33333	17	29.3333	13.3333	16.6667	19.6667	13.6667	11	12	0	Bonemarrow_CE
Cntln		675	702.667	534	710	628.833	685.667	456.2	437.4	336.667	346	172.667	125.333	36	53.6667	562.667	565	417.333	380.333	207	196.333	112	154.667	0	Hypothalamus_RT
Cntnap1		2281.5	2778.33	2280.67	2669	43.8333	44.3333	9423.6	9146.2	78.6667	61.3333	141.667	151.667	44.6667	26.6667	170.667	248	283	521	944	779.333	107.667	262.667	0	Spinalcord_RT
Cntrob		189	190.667	417	500.333	824.333	1054.33	485.6	467.2	443	426	414.667	315.667	127.667	151	148.667	236	180.667	217	225	175	126	159.333	0	Bonemarrow_CE
Coa3		1210.5	1320	738.667	870.333	585.667	696	1523.6	1508.8	402	435.333	1106.33	1090	561	715.667	483	770.667	499.333	625	1064	1542.33	2328.33	2681	0	muscle_CE
Coa4		79	89.3333	103.667	109.333	129.5	145.5	117.4	101.2	151.333	151.667	250.333	264.667	75.3333	90.3333	72.6667	180.667	81.6667	86	116.667	121	208	271.333	0	muscle_CE
Coa5		1472	1613	1215.67	1360	2369.5	2901.5	2653.2	2425.4	1638.33	1727.67	2106	1867	1843.33	1672	2130.67	2289.33	2213.67	3856.33	7513.33	9317.33	6955.67	9168	0	BAT_CE
Coa6		248.5	261.333	159	192	147.333	174.833	317.2	302.4	139.667	146.333	175.333	196.333	232	281	165	266.667	169.333	308.333	344	385.667	471	559.667	0	muscle_CE
Coasy		570.5	653.667	472	569.333	460.333	582.833	914.8	847	428.667	409.667	547.333	516.667	2255.33	2691	736.333	1307.67	1062	1859	2874	4059.33	446.333	1059.33	0	BAT_CE
Cobl		1389.5	1742	878	1043.33	7	7.66667	1261.4	1212	53.6667	45.6667	5668.33	4346.67	650.333	504.667	152.667	205.333	58	47.6667	82.6667	35.3333	2920	2651.33	0	Ileum_RT
Cobll1		134	172.667	179	239.333	243.333	317.167	954.8	840	471	372.667	690.333	478.333	704.667	543.333	967.667	938.333	627.333	401	498	340.667	258	379.333	0	VAT_RT
Cog1		938	1018	850.667	1028.67	914.833	1077.5	1439	1371.2	813	820.667	1143.67	989	370.333	408.333	455	820.667	601.667	496.333	580.333	471.333	1179.67	1198.67	0	Spinalcord_RT
Cog2		681	788	567	664.333	705.667	833.5	856	843.8	823	805.333	1128	975.333	491.333	551	742	788	793	718	925.667	1196.67	1116.67	1180	0	BAT_CE
Cog3		829.5	940	917	1088	1086.33	1265.83	1369.2	1254	1282.67	1235	1841.33	1638.67	489	575	657	1246.33	730.667	707	752.667	645.333	734.667	978.667	0	Ileum_RT
Cog4		1381	1555	979	1118.67	1040.67	1266.5	2102.8	2064.2	1105.33	1102.33	1534.67	1473.67	1543.67	1647.67	1483	2266.67	1876.33	1715.33	3223.33	2918.33	5036.67	4875	0	muscle_RT
Cog5		1555	1609.33	1019.33	1234.67	454.833	519.333	916.4	831.6	1706.33	1468.33	1815.67	1504	519	562.667	742.667	1227.67	777	861	767	705	465.667	502	0	Ileum_RT
Cog6		1042.5	1280	828.667	994	578.333	692.833	1583.8	1450.8	610.333	561.333	1247.67	1105.67	542	663.667	573.333	901.333	697.333	627.333	1108.33	916.667	4835.33	4731.67	0	muscle_RT
Cog7		1129.5	1260	890.333	1058.67	431.333	508	1459.8	1450.6	373	381.667	567.333	472.667	404	461	468.333	571.667	541.667	396	703.667	657.667	993	1119.33	0	Spinalcord_RT
Cog8		592.5	635.333	478.667	590.333	543.667	636.333	668.8	672.8	855	880	650	592	496.667	577.667	369	637	460	510.333	503	460.333	1000	999.667	0	muscle_RT
Coil		489	563.333	359	446.667	199.167	233.667	549.2	538.4	257.667	244.667	161.667	124.667	91.6667	106	109.333	162.667	131.333	128.333	139.333	130	259.333	301	0	Brain_CE
Col11a2		395	394	775	872	312.667	410.333	2573	2514.2	263.667	262.667	71.3333	91	24	27.6667	24.6667	45	45.6667	101.333	178.667	170	341.667	312.333	0	Spinalcord_RT
Col12a1		353	448.333	491.667	515	54.5	80.1667	1061.8	919	517.667	471.667	2184.67	2017	195.667	129.667	152.667	969.333	362	109	1333.33	322.333	550	784.667	0	Ileum_RT
Col14a1		33.5	45.6667	60.3333	79.6667	258.5	416.667	136.8	149.2	3706	3858	719.667	559.667	1395.67	1677.33	607.667	1291	1866.67	653	506.333	429.667	1111.33	1826.33	0	Spleen_RT
Col15a1		82.5	99.3333	191	220	12.1667	15.5	503.4	544	83.6667	93	462.333	389	304	193.667	3861.33	2379	5761	1989.67	1478	1094.67	3287.67	4121	0	SAT_RT
Col16a1		360.5	292	1064.33	1247.67	54.6667	65.6667	2290.6	1995.6	408.333	412.333	285.333	250.333	71.6667	84	293	534.667	449.333	108	119	91.3333	487	613.667	0	Spinalcord_RT
Col17a1		38.5	36.3333	15.3333	28.3333	6.33333	8.83333	8	8	40	55	43.6667	35.3333	8	7.33333	34	105	43.6667	24.3333	13.3333	9.33333	10.6667	17	0	VAT_CE
Col18a1		373.5	441.667	391.333	453	48.6667	49.3333	439.8	442.2	769.667	720	720	597.667	22129.3	24540	2592.33	2191.33	2715.67	822	498.333	510	796.667	1017	0	Liver_CE
Col1a1		653.5	525.667	198.333	205.333	368.167	1016.17	1054.4	1225	1037	1025.33	1645.67	1327.33	204.333	202.333	2670.33	2939.67	27889.7	3271	3598.33	2541	17309.7	18133.3	0	SAT_RT
Col1a2		1082.5	1024.33	733	736.333	1247.67	2125.83	2292.4	2418	3866	3865.33	2833.33	2157	387	495	6280	6869	33792	6951.67	6172.33	3907	20356.7	22923.7	0	SAT_RT
Col20a1		41.5	49	70.3333	83.3333	80.8333	64.6667	124.4	109.4	88	107	112	94	34	40.3333	59.6667	72	79.3333	93	141	85.6667	146.667	185	0	muscle_CE
Col23a1		246.5	258.333	653	641.333	15.8333	25	1473.6	1381.4	217.333	197	235	190.667	6.33333	12.6667	280.667	179.333	125	71.6667	168.667	56.3333	104.333	124	0	Spinalcord_RT
Col27a1		71.5	70.6667	196	233	170.167	268.833	620	598.8	474.333	369	369.667	326.667	771.333	793	134.667	253.333	303	561	2049	1771	120	254.667	0	BAT_RT
Col3a1		341.5	364.333	266.667	265.667	136.167	176.333	1061	835.2	3213	3537	8840.33	6955	1104	1613	22125.7	21825.7	89094	26038.3	16539	9829	27686.7	34005.3	0	SAT_RT
Col4a1		856.5	970.667	1644	1901.33	507	653.333	1808.4	2037.4	5238.33	5816	3095.67	2820	1285	1540.67	16358.3	15466.7	29984	9998.67	15686.7	13174.7	13063	14993	0	SAT_RT
Col4a2		695.5	766.667	1951.67	2268.33	313.333	423.833	2356.4	2438.6	2546.67	2694.67	1626.33	1419	744.333	769.333	7315	6939.33	13107.3	4645	7960.67	6592.33	9733	10560	0	SAT_RT
Col4a3bp		1634	2036.33	2369.67	2744	2023.5	2129.17	3949.8	3891	1844	1635	2934.33	2500.67	900.333	1018.33	1656.67	1805.33	1387.67	1617.67	1659.33	1580	2753.67	3765	0	Spinalcord_RT
Col5a1		196	228	191.333	192.333	767.833	1110.17	577.6	504.6	846.333	951.667	1375	1142	358	367.667	3595.33	3200.67	9657.67	3082.33	1935.33	1261.33	4206	5338.33	0	SAT_RT
Col5a2		157.5	173	311	326.333	108.5	167.333	793.6	728.8	842.333	817.333	1293	1130.67	121	167.667	2729.33	2395.33	7815	3004.67	1621.67	1159	2793.67	3840.67	0	SAT_RT
Col5a3		51	49.3333	180.333	219	539.667	791.833	715.6	709.8	60.6667	44.3333	242.667	258.667	713.333	1028.33	5204	3167.67	9355	4515.33	1718.67	1782	3875.33	5500.67	0	SAT_RT
Col6a1		429	475	389.667	378.333	422.5	514	1041.4	859.2	666.333	630.333	2497.67	1952	209.333	282	3384	3310	7584	2391	2497	1531.67	7047.67	8870.33	0	muscle_CE
Col6a2		271	240.667	250.667	252	239.333	297.333	642.2	435.2	297.333	268.667	2013.67	1491.33	111.333	120.333	2421	2503	6425.67	2089	1873	1260.33	6292.33	7478.67	0	muscle_CE
Col6a3		132.5	159	289.333	304.667	89.1667	139	368.6	306	907	890.333	3943.67	3346.67	384.667	424	2182	2694	15475	4826.67	4079	2661	5139	7139.67	0	SAT_RT
Col7a1		36.5	35	156.333	200.667	74.8333	96.5	205.4	194.4	495.667	458.667	69	85	13.6667	15.6667	96.6667	306.333	39	47	180.333	120	1624.33	1791	0	muscle_CE
Col8a1		125.5	190.667	140.333	144.667	121.667	131.833	184.8	146	42.6667	37.6667	69.3333	68.6667	28.3333	35	124.667	156.333	91	63.3333	149.667	155	222.667	360.667	0	muscle_CE
Col9a3		425.5	420.333	286.667	331.333	25.1667	30.5	800.4	736.2	38.3333	35.3333	17	15.3333	6	7.66667	15	16.6667	18.3333	18	10.6667	9	11.6667	14.3333	0	Spinalcord_RT
Colec12		308.5	373.667	334.333	376	122.5	155.5	340.6	286.4	1050.33	932	269	229	1373.33	1555	838	1203	651	637	238	183	484.333	747	0	Liver_CE
Commd1		641.5	697.333	475.667	585.333	785.667	870	766.8	769.4	519	541	769	799.667	534.333	628.667	530.333	661.333	593	740.333	899	979.667	2056	2347.33	0	muscle_CE
Commd10		312	348.333	217.333	225.667	234.5	258	480.6	454	237.333	229.667	322.667	252.333	89.6667	104	250.333	341.333	237	240.333	255.333	305.333	254	270.667	0	Spinalcord_RT
Commd2		213.5	247	142	154.333	311.667	382.167	341	327.8	280.333	273.667	260.333	248	173.333	206.333	199.667	283.333	178.667	273.667	258.667	278.667	437.333	604.667	0	muscle_CE
Commd3		765.5	787.667	503.667	686.667	682.333	832.667	1267.2	1167	756.333	711.333	757	712	810.333	1003.33	802	1481.33	755.333	1460	1498.33	1909.67	2842.33	3305.33	0	muscle_CE
Commd4		511	480.667	367	497.333	536.833	629	821.4	843.2	561	561.333	510	512	245	270	317.667	547	364	441.667	518	568	742.333	819.333	0	Spinalcord_CE
Commd5		393	383	201.333	262.333	215.5	262.667	470	483.4	183.667	186	271	224.667	164.333	206.667	136	203.333	146	111.333	173.667	209.333	330.333	336.333	0	Spinalcord_CE
Commd6		248.5	276.333	244.333	251	248.833	289.667	602.6	567.4	259	253	322.667	359.333	298	357	296	441.667	352.333	519	608.333	758.333	264.333	344.333	0	BAT_CE
Commd7		385	430.333	402.667	476	610.833	678.5	717.4	694.8	611	532	569.667	558.667	348	392.333	315.333	501.667	375.333	351	382.667	377.667	524.667	555.333	0	Spinalcord_RT
Commd8		801.5	850	695.333	791.667	960.5	1027.83	1040.2	957.2	1255.33	1112	769.667	639.667	321.667	357.667	560.667	719.333	591.333	782	570	682.667	874.333	1032	0	Spleen_CE
Commd9		474.5	523.667	367.333	424	158	181.167	692	671.2	171	170.667	269.667	259.667	243	259.667	230.667	328.667	242.333	219.333	358	417	1064	1207.67	0	muscle_CE
Comt		1204	1336.33	781.667	913	1483.5	1907.67	1869.8	1765.6	913.333	1062.67	1460.67	1327.33	17466.7	18699	2492	4605.33	2876.67	5119.33	3539	10621	1998.67	3108	0	Liver_CE
Comtd1		252	251.333	249.667	325	227.333	256.5	359	366.8	158.333	189.667	367.667	404.667	76.3333	90.6667	145.333	305.667	141.333	191.667	302	442.667	165.667	172.667	0	BAT_CE
Copa		5902.5	7022.67	5772.67	6835.33	5670.17	6277.83	9439.8	9087.8	5979	5629.33	11524	9540.67	4910.67	5844	4258.33	6952.67	4954.67	3561.67	4741.67	3943.33	9191.33	9462	0	Ileum_RT
Copb1		1685	1976	1448	1746	2262.5	2579.5	2306	2197	2218.33	2141.33	4817.33	4457	2066.67	2530	1793.33	2782.33	1688.67	1754	2586.67	2119.67	1366.33	1980.67	0	Ileum_RT
Copb2		2955.5	3294	2114.33	2586.67	3074.83	3586.17	3666.6	3553.8	2733.67	2634.67	6562.67	6742.33	2447.33	3232	2159.33	3322.67	2331.33	1951.33	2511.67	2123.67	4430.67	4496.33	0	Ileum_CE
Cope		1706.5	1971	1190.33	1381.33	1381.5	1620.83	2329.4	2503.6	1177	1251.33	1907	1824	1504.67	1768.67	881.333	1626.33	962.333	982	1350	1347.33	3648.33	3682	0	muscle_CE
Copg1		5660.5	7188	6053	7220	2215.5	2584.67	12955.2	13078.4	2670.33	2670.33	4688	4144.33	1933.67	2100	2092.33	3203	2172.33	1880.33	1944.67	1857	3136.67	3410.67	0	Spinalcord_CE
Copg2		2290.5	2708	2855	3305	1087	1112.33	2367.2	2279.8	1224	1131.67	1546	1385.67	618.333	793.667	1070.33	1478.33	946	834.333	1097.67	1020.67	688	749.667	0	Hypothalamus_RT
Coprs		628.5	638.333	682.333	793.667	25	33.3333	977	1057.4	78.3333	72.6667	202.333	214	43.6667	51.3333	109.667	222	99.6667	95.6667	75.3333	85.3333	190.333	190.667	0	Spinalcord_CE
Cops2		2311	2512.67	2101	2557.67	1594.67	2008.17	3779	3499.8	1505.67	1445.33	1798.67	1475.67	944.333	1081.33	2116.33	2968.33	1846	2785.33	2192.33	2917.67	3416.33	3964.67	0	muscle_CE
Cops3		1386.5	1475.33	1155	1465	1232.17	1454.83	2042.2	1885.2	982	1102.67	1410.33	1317	746	978.333	839	1221.33	878.667	1353.67	1839	2068	3848.67	4091.67	0	muscle_CE
Cops4		1806.5	2086.33	1436.33	1781.33	928.167	1137.33	2530	2371.6	1068.33	1033	1634.33	1575.67	626	753.333	700	1110.33	835	807	1199.67	1051.33	5214.33	5175	0	muscle_RT
Cops5		1356.5	1471.67	880.667	1133.33	1156.5	1474.5	2306.2	2211.2	882.333	883	1255	1265	861	1053	751.667	1100.33	778	1030.33	1180.67	1277	5835.67	6052.67	0	muscle_CE
Cops6		1144	1223	626	802	1082.83	1272.83	3115.2	3040.4	466	463.333	825.333	844	1002.67	1014.67	678	760.333	658.667	758.333	948.667	1039	4137.67	4149.33	0	muscle_CE
Cops7a		1542	1762	937.333	1165.67	522.167	629.5	2783.8	2682	536.333	555.667	1024.33	890.667	655.667	691.333	507	791.667	604	620	1160	1103	4686.33	4900.67	0	muscle_CE
Cops7b		302.5	370.333	291.667	335	450	532.833	545.4	535.8	319.333	298	305.333	240	229.667	242.333	178.667	263	183	191.667	201.333	174	628	671.667	0	muscle_CE
Cops8		1634.5	1905	1206.33	1446.33	879.5	1042.83	2535.2	2494.2	737.333	757.667	681.667	613.667	489.667	557.333	654.333	780.667	788	689.333	1224.67	1043.33	4768.33	4888.67	0	muscle_CE
Copz1		1015	1112	743.333	881.333	3583.17	4158	2126.2	2061	1067.67	1107	2075	1961	1700.33	1933	816.667	1186	953.667	943.667	1113	1160.33	2085.33	2486.33	0	Bonemarrow_CE
Copz2		133.5	119	67.6667	66	33.3333	40	162	153.4	76	77.3333	138.667	113	200.333	232	553	570.333	601.333	505.667	674	618.333	1033.67	1023.67	0	muscle_RT
Coq10a		561.5	686.333	497	619.333	205.5	238.667	1037	969.8	299.333	251.333	240	203.333	379	348	288	493.333	385	668	3197.33	2791	17256.7	20315.3	0	muscle_CE
Coq10b		488	615.333	358	448.333	359.667	416.833	456.4	432.4	386.667	396	607.667	619	321.667	384	276	492	279.333	454.667	1171.67	775	540.333	554.667	0	BAT_RT
Coq2		929	1024.33	729	837	380.667	463.667	1323	1221	651	604	681	658.333	496.333	568.667	577.667	801.667	774	782	1024.33	1105	3107.33	3623.67	0	muscle_CE
Coq3		336	389.667	372.333	433	132.5	168	656.2	625	164	146.333	338.333	286	425	439	298	426.333	348.667	614.333	1015	1167	1453	1816.67	0	muscle_CE
Coq4		334	365.333	232.667	266.667	175	200	320.2	293.2	102.333	106	328	312.333	118.667	148	140.333	182	164.667	155.667	358	427.667	363	431.667	0	muscle_CE
Coq5		866.5	997.667	666.333	766.333	400.167	489.5	1053.6	1118.4	483	492.667	713.667	650.333	597.667	741.333	582	823	787	1107.33	2912.33	2897.67	4748	5438.67	0	muscle_CE
Coq6		413.5	441	407.667	481.333	267.167	330.333	661.6	626.8	276	309.333	474.333	413.333	273.667	317.667	351.333	484.667	429.667	745.333	2959.67	3031.67	1229	1366	0	BAT_CE
Coq7		554.5	567.333	301.667	406.667	233.167	302.833	854.8	820.6	128.333	145.667	382	354.333	322.333	322	290.667	386.333	297	602	1448.67	1644.33	1861.67	2109.67	0	muscle_CE
Coq9		1030	1152	794.333	900.667	566.167	716.333	1737.4	1765.2	485	533.333	1098.67	1096	1777	2017	1118	1892.33	1602.33	2879.67	8574.33	9829.33	18483.7	21311.7	0	muscle_CE
Coro1a		1781.5	2160.67	643.667	705.333	20789.7	20626.5	1004.4	1038.8	13936.7	13192.3	1827.67	1056	60.3333	96.6667	478	391.667	1422.67	1613	169.333	116.333	217.667	376	0	Bonemarrow_RT
Coro1b		1207.5	1282.33	645.667	806	3665.33	4077.17	2081.8	1907.6	3225	3178	5084	4729	806.333	1029.33	2091.67	2180	2297.33	1733.33	1969.33	2205.67	839.667	1222.33	0	Ileum_RT
Coro1c		1740	2009.33	1813.33	2211.33	2945	3328.33	3500.6	3316.2	1481	1595	6085.67	5604	451.667	525	912.667	918.667	975.667	768	508.333	566.667	817.333	1150.33	0	Ileum_RT
Coro2a		522.5	618.667	593.667	756.333	1084.33	1137.67	949.4	880.8	1015.67	909.333	11707.3	9414.33	25.6667	37	580	1168.67	238.333	221.333	22	15.3333	17.3333	55	0	Ileum_RT
Coro2b		1198.5	1455.67	523.333	633.667	25.5	39.3333	4044.4	3690.2	33.3333	24.6667	48	39.6667	34.6667	35.3333	282.667	398.333	477	298	238	186.333	377.333	624	0	Spinalcord_RT
Coro7		698	765.667	737.667	842.333	3193.17	3397.17	1742	1637.4	1676	1465.33	1429.67	1050	252	278.333	422.667	542	642	621.333	534	506.333	810.333	948.667	0	Bonemarrow_CE
Cotl1		1374	1487	1069.33	1234.33	10193.3	9349	2163	2095.8	4887	4558.67	1881.67	1492.33	183	249.667	1016.33	542.333	837	636.667	172	157.333	438.667	652	0	Bonemarrow_RT
Cox10		414.5	522.667	215.333	282.667	243.333	301.333	710.6	706.2	265	242.667	426	336.333	259.667	217.667	143.667	233.333	191	338.667	869.667	1133.67	2852.33	3160	0	muscle_CE
Cox11		61	82	70.6667	90.3333	315.167	416.833	551.2	575.8	65.3333	81.6667	83	80.3333	57	73.6667	26.3333	51	41.6667	59.3333	118.333	133.333	914.333	1008.33	0	muscle_CE
Cox14		740.5	785.667	328.333	400.333	375.333	436	1264	1294.8	324.667	317	584	661.333	247	306.667	430	659.667	507	680.667	1402.33	1172.33	2858.33	3279.33	0	muscle_CE
Cox15		482	535	485	590.333	703.667	892.667	789.8	781	585.333	587	1179.33	934.333	642.667	672	428	1499.33	543	690.333	1336.67	1608.33	1833	2162	0	muscle_CE
Cox16		516	552	654.333	761	217.833	257.5	324.4	322.6	560.667	485.667	885.333	759.333	549	620.667	677.667	868.667	615.667	1127.67	1011.67	1276	946.333	1136	0	BAT_CE
Cox17		697.5	709	557.333	719	814.5	1001.33	939.8	1067.6	878.333	875.667	886.667	844.667	317	390.667	588.667	861.333	696	1325.67	3360	4278.67	2120.67	2617	0	BAT_CE
Cox18		179	215.667	235.667	281.667	120.667	141	238.2	226	233.333	219	158.667	142	179.667	228.667	182.667	263.333	173.667	230.333	318.667	311.333	269.333	335.333	0	muscle_CE
Cox19		482	551.333	379	466.667	256.333	313	506	509.2	236.667	227.667	480.333	480.667	399.333	497.667	442.667	513.667	587	971.667	1040.67	1855	1075	1411.67	0	BAT_CE
Cox4i1		13075.5	13910.3	4981.33	5827	4337.5	5165.17	13843.8	14588.8	2889	3327.67	7659.67	7467.33	5690	6926.33	5668.33	9047	7247	11707	29442.7	32224.7	32993	35590.3	0	muscle_CE
[truncated: 17,925 more rows]
