# Supplementary material for: Comparative multi-tissue profiling reveals extensive tissue-specificity in transcriptome reprogramming during thermal adaptation
Source: eLife. 2022 May 17;11:e78556. doi: 10.7554/eLife.78556 (PMC9113744; doi:10.7554/eLife.78556)
Supplement: Supplementary file 11. [file elife-78556-supp11.xlsx]

## Sheet: Suplementary File 11
gene symbol	marker	Brain_RT	Brain_CE	Hypothalamus_CE	Hypothalamus_RT	Bonemarrow_RT	Bonemarrow_CE	Spinalcord_RT	Spinalcord_CE	Spleen_CE	Spleen_RT	Ileum_RT	Ileum_CE	Liver_RT	Liver_CE	VAT_RT	VAT_CE	SAT_RT	SAT_CE	BAT_RT	BAT_CE
Acnat2	fatty_acid_marker	0	0	0	0	0	0	0	0	0	0	0	0	317.333	245.667	0	0	0	0	0	0
Acsm2	fatty_acid_marker	0	0	0	0	0	0	0	0	0	0	0	0	78	83	0	0	0	0	0	0
Acsm4	fatty_acid_marker	0	0	5	0	0	0	0	0	0	0	0	0	0	0	0	5.66667	0	0	0	0
Cyp7a1	fatty_acid_marker	0	0	0	0	0	0	0	0	0	0	0	0	3058.67	2315.33	0	0	0	0	0	0
Gip	fatty_acid_marker	0	0	0	0	0	0	0	0	0	0	32	32.6667	0	0	0	0	0	0	0	0
Hao2	fatty_acid_marker	0	0	0	0	0	0	0	0	0	0	200	121.667	0	0	0	0	0	0	0	0
Lipi	fatty_acid_marker	0	0	0	0	0	0	0	0	0	0	0	0	0	0	6.33333	1030.33	0	0	0	0
Pla2g1b	fatty_acid_marker	0	0	0	0	0	0	0	0	16	17.3333	0	0	0	0	0	0	0	0	0	0
Acsbg2	fatty_acid_marker	0	0	0	0	0	0	0	0	0	0	0	0	0	0	14.6667	29	0	10.3333	0	0
Tecrl	fatty_acid_marker	0	0	0	0	0	0	10.6	8.2	0	0	0	0	0	0	0	0	0	0	11.6667	0
Fabp4	thermogenic_marker	0	0	0	0	291.5	520	47.6	35.2	338.667	227.667	820.333	2032	699	281.667	147739	148248	150268	236739	172631	187767
Them5	fatty_acid_marker	0	0	0	0	0	0	23.8	28.4	0	0	0	0	5.33333	0	0	0	0	0	0	0
Alox12e	fatty_acid_marker	0	0	0	0	85	80.5	0	0	0	0	0	6	0	0	0	9.33333	0	0	0	0
Ucp1	thermogenic_marker	0	0	0	0	0	0	11	15.2	0	0	5.66667	0	451.667	95.3333	491	91.3333	99	17636	113669	179004
Cyp1a2	fatty_acid_marker	0	0	5.66667	0	0	0	0	0	0	0	0	0	9406.67	9750	0	0	0	0	8.66667	0
Cyp4a10	fatty_acid_marker	0	0	0	0	0	0	10.8	0	0	0	0	0	5523.67	5230.67	0	0	0	0	11	0
Cyp4f40	fatty_acid_marker	0	0	0	0	0	0	0	0	0	5	2147.67	1899	0	0	0	10	0	0	0	0
Acsm1	fatty_acid_marker	0	0	5	0	0	0	8.6	0	0	0	0	0	7558	9362.33	0	0	0	0	5.33333	0
Adh4	fatty_acid_marker	0	0	0	0	0	0	0	0	0	0	6	0	3665.67	4113.67	0	0	0	0	8.33333	8.33333
Hao1	fatty_acid_marker	0	0	6	0	0	0	7.6	0	0	0	0	0	6063.67	7251.33	0	0	0	0	7.33333	0
Aco2	thermogenic_marker	8354.5	9461.67	6286.67	7668	2892.83	3679	15764.4	15247.2	2068.33	2239.67	8763.33	8058.67	3567.33	3222.33	4700.33	6675	7172.33	18053	113055	88324.3
Abcb11	fatty_acid_marker	0	0	12	0	0	0	19	0	0	0	0	0	20263.7	25526.3	5.33333	0	0	0	20.6667	0
Acot5	fatty_acid_marker	36	36	10	10	0	0	17.8	18.8	0	0	0	0	0	0	0	0	0	0	0	0
Alox12b	fatty_acid_marker	62.5	91.3333	6.33333	7	0	0	46.6	31.2	0	0	0	0	0	0	0	0	0	0	0	0
Apoa5	fatty_acid_marker	0	0	9.66667	0	0	0	10.4	7.4	0	0	0	0	15080	17999.7	0	0	0	0	15	0
Ghsr	fatty_acid_marker	11.5	14.3333	138	164	0	0	69	71.4	0	0	0	0	0	0	0	0	0	0	0	0
Acsl1	thermogenic_marker	1308.5	1551	1224	1428.67	5224.83	6550.5	2026.6	1828.2	1768.33	2109	1110.67	1099.33	31094.3	34430.7	14961.3	20047	31813	31303.3	79077.3	47234.7
Acnat1	fatty_acid_marker	0	0	0	0	0	8.16667	6	0	0	0	424.667	414	1270.33	1085	0	19.3333	0	0	0	0
Acoxl	fatty_acid_marker	0	0	0	0	0	0	0	0	16.3333	13.6667	9	10.6667	0	0	5.66667	20.3333	0	22.3333	0	6.66667
Apoa4	fatty_acid_marker	0	0	0	0	0	0	5.6	0	10	17.6667	2576.67	3492.33	1460.33	1961.67	0	0	0	9.66667	0	0
Cd36	thermogenic_marker	40.5	32	80.3333	98	3528.67	4742.5	35.4	46.4	5902	5609.33	608.667	846.667	914	751.667	61756.3	55111.7	46607	56740.3	56375.3	46743.7
Baat	fatty_acid_marker	0	0	0	7	0	0	10.6	8.4	0	0	167.667	170	5703.67	6382.33	0	0	0	0	6	0
Cidea	thermogenic_marker	75.5	78.6667	82.6667	89.6667	0	0	165	122.8	0	0	12	5	163.667	38	133.333	112	1107.67	7249	45814.3	39792.3
Fabp2	fatty_acid_marker	0	0	0	0	0	0	0	0	42	238.667	46422.3	100983	838.667	1045	0	0	35.6667	106.333	0	0
Acaa2	thermogenic_marker	589.5	654	362	382.667	932.167	1193	744.2	698.4	709.333	800.333	1669	1246.33	16046	19569.7	1560.67	2024.33	2285.33	6033	45261.3	30405.3
Slc27a5	fatty_acid_marker	0	5.33333	18	13.3333	0	0	41.2	28.8	0	0	0	0	17248	22233.7	0	0	0	0	20.3333	0
Acot3	fatty_acid_marker	40	34	40.6667	41	0	0	25.2	22	0	0	0	0	22.3333	27.3333	0	0	0	0	24.6667	0
Eci3	fatty_acid_marker	0	5.33333	0	0	0	0	7.4	0	0	0	430.667	491.667	0	0	208	274.667	258.333	341.333	185.333	99.6667
Elovl3	fatty_acid_marker	0	0	10	0	0	0	8.4	9.4	0	0	0	0	16617.3	13854.3	33.6667	14.6667	8.66667	1844	1223.67	12810
Fa2h	fatty_acid_marker	436.5	412.333	250.667	346.667	0	0	6524	5462.6	0	0	72.3333	44	0	0	5.66667	31	5.33333	0	0	0
Hnf1a	fatty_acid_marker	0	0	8.33333	12	0	0	0	0	13.6667	15.6667	910.667	921	592.667	590.667	42.6667	19	0	8.33333	0	0
Slc27a6	fatty_acid_marker	0	0	0	0	10.6667	14.1667	20	15	7	7.66667	5.66667	5.66667	0	5.33333	0	0	5.33333	6.66667	0	0
Adh7	fatty_acid_marker	0	0	17	20	0	0	9	5.2	0	0	0	0	505	477	8.66667	24.6667	78	51	15.3333	11.3333
Alox15	fatty_acid_marker	0	0	0	0	3374.83	2682.17	9.2	39.2	35.3333	59.3333	12.6667	16	0	0	119.333	98.3333	21.6667	33.6667	0	0
Aloxe3	fatty_acid_marker	66	62	117.333	142.667	5.66667	7.66667	51.4	50	16.6667	26	0	0	0	0	6.66667	11	0	0	0	0
Fabp1	fatty_acid_marker	0	5.66667	37	8.66667	0	0	44.6	29	14.6667	10.3333	102.667	72	52047.7	76065	0	0	0	0	53.3333	0
Lipc	fatty_acid_marker	7.5	0	5.33333	0	21.5	38.5	0	0	70.3333	62.6667	19.3333	21	2767.33	3613	6.66667	621.333	0	0	0	0
Ces1f	fatty_acid_marker	0	0	0	0	0	0	12.2	0	12.3333	11.6667	2385	2277.33	7283.67	11650	1740.67	4119.67	4309.67	3243	1998.67	1130
Elovl4	fatty_acid_marker	1040	1354.33	721.333	832	5.83333	0	1888.6	1819	0	0	7.66667	0	0	0	6	388.667	0	14	19	67.6667
Rgn	fatty_acid_marker	7.5	6	15.3333	12.3333	0	0	28.8	31	0	0	20.6667	21.3333	16541.7	21113	21.6667	210.667	0	0	18	0
Cs	thermogenic_marker	5790.5	6806.33	3480	4136.67	4590.33	5746.17	9314.6	8800.2	2896	3130.33	13182.3	12475.7	2798.67	2939.33	5006	6984	6826.67	11055.3	40035.7	35313
Scd3	fatty_acid_marker	61.5	67.3333	25.3333	33.6667	0	0	212.8	220.4	0	5.66667	0	0	0	0	27.3333	58	9	19	27.6667	33
Acot12	fatty_acid_marker	11.5	11.6667	19.6667	25	0	0	15.6	11.4	0	0	19.3333	28	2292.33	2732.33	6.33333	0	0	15.3333	28.6667	148.667
Adtrp	fatty_acid_marker	0	0	0	0	56.3333	52.6667	0	0	18.6667	18	1357.33	1266	2275.33	2368.33	104.333	145.667	151.333	328.333	2099.67	1424.33
Cpt1b	fatty_acid_marker	0	0	6	0	0	6.83333	0	0	12	11.6667	28.3333	25.6667	11	7.33333	6	7.33333	17	133.667	907.333	665
Fabp3	fatty_acid_marker	253.5	283.667	124.333	160.333	0	0	260.4	252.4	7.33333	0	0	0	15.3333	0	15	6.33333	18	389	2698.67	2682
Pla2g5	fatty_acid_marker	68	89.3333	31	32	0	0	86.2	89	479.333	422.333	244	298.333	0	0	25.6667	419	47.3333	35	0	0
Ptgds	fatty_acid_marker	17427.5	18205.3	11013	12409	0	0	28079.8	19987	0	0	0	0	58.3333	57.3333	234.333	3265.33	14	16.6667	113.333	183
Scd4	fatty_acid_marker	0	9	6.33333	11.3333	0	0	6	0	16	12.6667	23.3333	20.6667	0	0	12	29.3333	12.6667	26	20.3333	19.6667
Apoc2	fatty_acid_marker	0	0	0	0	96.5	93	5.4	0	30.6667	31	280	513.667	2643	2852	20.6667	24	15.6667	43	7	12.3333
Pdha1	thermogenic_marker	4502.5	5271	2457.67	2936.67	2091.67	2535.83	7162.8	7166.2	1465.67	1483	4462	3937.67	2142.67	2314.33	3600.67	6158.33	5605.33	11899	31614.3	43018.3
Hadh	thermogenic_marker	484	542.667	366.333	437	482.833	602.667	1262.8	1157.2	512.333	505.667	6647.67	6276.33	4779	5445.33	3983.33	4958.67	5178.33	8645.33	27876	22079
Adipoq	thermogenic_marker	0	0	0	0	248.5	438.667	7.8	6.2	86.6667	71	228.333	548.667	98.6667	24	48749	48812.3	50895.3	38503	27144.7	17281
Idh3a	thermogenic_marker	3853.5	4641.33	2255	2730.67	1130.5	1432.67	5999.4	5871.4	719.333	798	2400.33	2216	809	620.667	2051.67	2444.33	2765.67	7253.33	26817.3	28433
Dlst	thermogenic_marker	2530.5	2838.33	2103	2375.67	4157.83	5022.67	5046.2	4946	2662.67	2936	6213.33	5870.33	4124.33	4065.67	2450.33	3175.67	3224.33	6142.33	24870.7	26214.7
Cyp1a1	fatty_acid_marker	0	0	0	0	6.66667	7	0	5.4	8	11.3333	10.3333	17.6667	19.3333	20	20.6667	54	89	88.3333	146.667	480.333
Elovl2	fatty_acid_marker	306	353	137.667	179	0	0	827	739	12.3333	7.66667	5.66667	0	8774.67	8544	33	386.667	0	6.33333	11	0
Hnf4a	fatty_acid_marker	0	0	5.33333	0	14.5	16.5	11.6	0	8.66667	52	22694	19504	12858.7	11713	92	61.3333	16	52	11.6667	0
Adipor2	thermogenic_marker	1767	1871.33	1345	1570	3698.33	4082.83	4332	3824.4	2121	2151	5222.33	5534.33	14585	16883.7	12500.7	13021.7	15124	13074.7	23822.7	23937.3
Etfdh	thermogenic_marker	760	849.667	585.667	696.667	942	1151.5	1234	1126	726.333	756.333	2474.33	2125.33	5672.33	6729.33	1388.33	2023	1916.33	4961.33	22560.7	21917
Ndufv1	thermogenic_marker	5076.5	5534	2497	2849	1832.83	2334.33	5759	6078.2	1231.67	1453.33	2646.33	2662.67	3440.67	3886.33	1969.33	2751.67	2711	4707	20207.3	18669.3
Cav1	thermogenic_marker	267	353.333	271	290.667	23.1667	25.5	873	785.2	777.667	651.333	1247.67	1249.67	155.333	96.6667	45889.7	28697.7	22794.3	16675	20142	12488.7
Ndufb8	thermogenic_marker	4212	4281	2173	2534	1287	1551.67	5771.4	5595	1099.67	1207.67	2508	2570	2104.33	2529.67	3259.33	3536.33	3200.33	6516.67	20117.3	20243.3
Decr1	thermogenic_marker	493	508.333	398.667	467.667	324	393.167	993.6	935.2	532	523.667	2129.33	1985	4121.67	4445	2978.33	4024.67	4155	9663.67	20006.7	22829
Prkag3	fatty_acid_marker	0	0	0	7.66667	0	0	32.2	27	22.6667	19.6667	16.3333	13.6667	11.3333	16	114.333	35.6667	69	41.6667	92.6667	67.3333
Acox2	fatty_acid_marker	6.5	10	9	11.3333	0	0	15.8	10.4	0	0	246.333	261.667	4586.33	6020.33	15.6667	15.3333	9	34.3333	39.6667	110
Acsm3	fatty_acid_marker	0	0	5.66667	8.66667	0	0	11.4	8.2	18.6667	10.6667	364.667	332.333	1503	1906.33	401	1107	551	798	2937	1712.67
Acsm5	fatty_acid_marker	16.5	17.3333	10	10.6667	0	0	83.6	85	0	0	7.33333	5	3015.67	3604.67	238.667	252	252.667	145	96	59.6667
Apoa1	fatty_acid_marker	6	13.3333	63.6667	27.3333	0	0	105.4	48.2	48	190.667	54556.3	81287.3	89553	130139	0	16	51.6667	144.333	85	0
Idh3g	thermogenic_marker	2400	2764	1995	2329.67	1873.17	2304.5	3825.2	3450.6	1698.67	1766	2160.67	2070	1050.67	1214.67	2064.33	2851.67	2759	4977.33	19852.7	19764.7
Cyb5a	fatty_acid_marker	862.5	924	619	732.333	0	0	0	0	1536	1723.67	2552.33	2343	13574.7	16151.3	7482.33	7643.67	6054.33	6533.67	3295.33	3574
Erfe	fatty_acid_marker	22	21.6667	47	50.3333	0	0	0	0	105.667	123	216	206	15	15.3333	38.6667	47.6667	34.6667	46.6667	27	17.6667
Ndufs1	thermogenic_marker	4439.5	4842.33	2822	3396.33	2108.33	2629.33	5809.2	5774	1708.67	1764	3802.33	3462	2948.33	3250.67	2082.33	3073.67	2796.67	5129	18805.7	16727.3
Etfbkmt	fatty_acid_marker	47.5	59	112.333	136.667	0	0	0	0	177	179	445.667	412.667	1091.67	1443.67	481.667	389	380.667	325.667	691	598.333
Ggt1	fatty_acid_marker	38.5	59	43	53	81	47.8333	75.2	76.6	69	78.6667	6931.67	8192	0	0	135.667	1274.67	19.6667	32.3333	0	0
Gk	fatty_acid_marker	858	950.333	631	740.333	0	0	0	0	241.667	288.667	6142.33	5288	2204	2271	759.333	2720.33	178.667	1100.33	7529.67	4137
Gpat4	fatty_acid_marker	2490.5	2944	1725.67	2006.33	0	0	0	0	1118	1124.67	1579.67	1518	3489	3821.33	3037	3078.67	2958.33	2267.33	9810.67	7638.33
Hacd1	fatty_acid_marker	208	203	118.667	143.333	0	0	0	0	41	60	335	321.333	79.3333	90.6667	180.333	188.667	143.667	194.667	263	228.333
Hacd2	fatty_acid_marker	409	452	325.667	386.333	0	0	0	0	109.333	107	228.667	221	415.333	420	3028.33	2866.67	1461	2120.33	1440.33	3098.67
Hacd3	fatty_acid_marker	3414	3946.33	4698.67	5446.67	0	0	0	0	1032.33	1142.33	1708.33	1566.67	3790.67	4228	765.333	1437.67	649	710.333	904.667	762.667
Hacd4	fatty_acid_marker	142.5	153.667	304.667	351.667	0	0	0	0	508	576.667	236.333	157.333	62.6667	88.6667	620.667	613.667	520	422.667	153.667	145
Acaa1b	fatty_acid_marker	5	9.66667	14.6667	7.33333	0	0	28	25.6	5	0	16	38	9284.67	11168.7	189	379.667	141	625.667	534.333	551
Pkm	thermogenic_marker	19014	22122.7	11235.3	12826.3	10417.5	9871.17	26586	28822.6	3124.33	3097.33	4286	5038.67	257	246	2066.33	3571.67	3749.33	7641	18805.3	39591.3
Liph	fatty_acid_marker	14.5	17	13	9.66667	20.1667	40.3333	23.8	20.4	19.3333	22	1739	1564.33	0	0	30	7.66667	0	10.3333	7.33333	17.6667
Mfsd2a	fatty_acid_marker	425	467.667	381.333	458.333	0	0	1336.4	1318.8	25	21.6667	147.667	193.667	96.3333	72.6667	88.3333	938.667	0	7	30.6667	64.3333
Acat3	fatty_acid_marker	28.5	27.3333	41	45.6667	0	0	50.8	36	54	40	26	29	1765.67	2077	39.6667	118.333	45.6667	33	72.6667	20.6667
Acot4	fatty_acid_marker	28	29.6667	74	85.6667	0	0	13	10.6	8	17.3333	727.667	598.333	460.333	352.333	128.333	103	92.3333	131	373.667	129.667
Ndufa10	thermogenic_marker	4134	4719	2037.67	2452	1129	1492	4254.8	4281.2	1189	1308.67	2606.67	2219.33	2955	3243.67	2002	2926.33	2610.67	4653.67	17322.7	16665.3
Dld	thermogenic_marker	2346.5	2505.33	1381	1745.33	1652.67	1989.5	4067.4	4034.6	1065.33	1005.67	2703.67	2663.33	2013.33	2291.33	2468.33	3226	2477.67	6789.33	16159.3	18894
Etfb	thermogenic_marker	599.5	607	355.333	467.667	1454.5	1664.83	1133	1190.8	634.333	680.667	1322	1293	4251.67	4691.67	1872.67	2120.67	3047	4665.33	16099.7	13907.7
Acsbg1	fatty_acid_marker	6535	6662	3418.33	3961	15.1667	20.5	9201.4	9346.8	71.6667	72.3333	63.3333	41.6667	0	0	338	561.333	44	42.3333	31	22
Cyc1	thermogenic_marker	3198.5	3365.33	1360.67	1623	1953.83	2407	5113.2	4998.8	989.333	1111	3586.67	3512	3216.67	3336.33	1496	1989.67	2007.33	4331	15855.7	15592
Bdh2	fatty_acid_marker	46	47.6667	87	108.333	0	0	160.2	148	9	7.33333	12	8.33333	189.667	320.333	48	56.6667	56.6667	43.3333	13.6667	7.33333
C1qtnf2	fatty_acid_marker	33.5	36	37.3333	44.6667	0	0	62.8	40.8	32.3333	29.6667	60.6667	37	18	21.6667	45	70	59	30.3333	23.6667	21.3333
C1qtnf9	fatty_acid_marker	8	5	6.33333	7	0	0	11.8	8.8	9.66667	10.3333	28.6667	24	10.3333	5.33333	327.667	714.333	321.333	293.333	632.333	654.667
Slc25a20	thermogenic_marker	312.5	366	307	354.667	474.167	480.833	480.2	460.8	456.667	454.333	2303.33	2082.33	2267.67	2453.67	884	1278.67	1201.67	4113.67	13860.3	15355.3
Fh1	thermogenic_marker	1782	1934	1247.67	1398.67	1177.17	1470.17	2646.4	2582	1133	1116.67	1896.67	1813.33	3983	3825	1346	2018	1886.67	3470.67	13211.7	11090.7
Cnr1	fatty_acid_marker	4210.5	5423	2795.33	3068.67	5.83333	7.33333	1810.6	1647.4	105	104.667	109	67.3333	0	0	312	262.667	479.333	247.333	44.6667	35.6667
Lpin1	thermogenic_marker	936	1143.67	1486.67	1730.67	698.833	870.667	3409.6	3396.8	1039.67	1155	509.667	442.333	984.333	1112	6063.33	7477	6211	8215	11994.7	18976.7
Cyp2e1	fatty_acid_marker	9.5	19.3333	60	19.3333	0	0	45.4	55.6	107	77.3333	174	389.667	78219.7	97847.7	47502	53028	38862.7	14012.3	3702.33	2417.33
Cyp2s1	fatty_acid_marker	119.5	133.667	106.333	125.667	0	5.16667	313.8	295.4	90.6667	62.3333	1412.67	1127.33	9	11	74	80	14.6667	20.3333	0	6
Cyp4f18	fatty_acid_marker	0	0	21.6667	22.6667	2054.67	1982.5	10.6	10.6	922.333	866	145.667	80.3333	10	10.3333	62.6667	55.6667	116.667	148	18.3333	21.6667
Etfa	thermogenic_marker	420.5	423	254.667	305.667	1026.33	1283.67	1142.4	1111.6	426.333	451.333	1516	1379.33	3221	3309	1985	1855.33	2342.67	3541	11520	12093.3
Gpat2	fatty_acid_marker	18	27.6667	68	84	0	0	8.4	8.8	68.6667	65.3333	64.3333	50	93	105	42.6667	67.3333	29.6667	47	33.6667	31
Dync1h1	thermogenic_marker	26092	34759.3	29176	33810.3	6585.33	7188.67	30335.4	31222.4	12312.7	11671.3	19712.3	16416.7	6488	6689.67	8150.33	11400.3	11605.7	7596.67	11219	9639
Acads	thermogenic_marker	239	232.667	176.333	193.333	529.5	663.167	396.6	364.6	398	430.667	1776.67	1543	3338	3675.33	1386	1587.33	2151	2872.33	10044	9223
Hadhb	thermogenic_marker	267.5	307	319.667	401.667	165.5	200.333	438.2	416.8	428.333	405.333	789.333	583	536	616	609.333	831.667	911.333	2472.33	9817	10214.3
Nr4a3	fatty_acid_marker	250	500.667	126	106.333	6.33333	7.5	42.6	55.2	85.6667	78	52.3333	48	0	0	29.6667	21	33	21	242.333	27
Pnpla3	fatty_acid_marker	253	269.333	292.667	372	0	0	615.8	583.4	34.6667	19.6667	69.3333	218	40.6667	22.3333	9896	12303.3	6792.33	17784.3	8298.33	16186.3
Cox7a1	thermogenic_marker	51.5	55.6667	26.6667	33	8.33333	9.16667	125	108.6	11.6667	12.6667	438.333	477.333	46	22.6667	74.3333	57	132.667	2076	9631	13738.3
Hnrnpu	thermogenic_marker	7100	8545	9301.67	11186.3	14367.7	17536.3	9671.4	9581.6	15455.7	15388.3	14609.7	12376.3	5610	6347.67	7345	10176.7	7475.33	8943.33	9549.33	7107
Ndufa9	thermogenic_marker	2860.5	3040.67	1382.67	1600.33	1204.5	1457.5	3986.8	3830.6	886.333	980.667	2330.67	2363.33	1953.67	2370.33	1239.67	1803.67	1673.67	2824.67	9065.67	9851
Cpt2	thermogenic_marker	190	210	163.667	176.667	512.333	613.833	523.4	473.8	282.333	296	2063.67	1698	3026.33	3067.67	1109.33	1543.67	1904.67	2870	8110.33	10605.7
Ppara	fatty_acid_marker	75	86.3333	62.3333	76.6667	0	0	186.2	187	11.3333	8.66667	640.333	521.333	3065.33	2960.67	149.333	180.333	281.667	507.667	7623.33	2712.33
Mfn2	thermogenic_marker	3822.5	4352.33	3147.33	3888	1442.33	1647.83	7152	7125.4	905.667	850.333	2825	2536.67	2329	2227.67	2740.33	2272.67	3518	3047.67	8057	8256.33
Ptgs2	fatty_acid_marker	177	288.667	20.6667	24.6667	23	26.5	46	50.4	8	10	230.667	146.333	0	0	5939.67	88.3333	50.6667	33.3333	17.6667	13.6667
Sox9	fatty_acid_marker	230	303.667	211.667	206	0	0	862.6	915.8	10.3333	9.33333	417.333	338.333	132.333	87.3333	116.667	225.667	21.6667	14.6667	13.6667	14.3333
Tnxb	fatty_acid_marker	173.5	158.333	315	363.333	0	0	430.4	394.4	3622.67	3506.33	1461	1118	549.333	478.333	3018.33	4317.33	11897	3162.33	3693.33	3093
Idh2	thermogenic_marker	918.5	1051	1065	1164.67	1298.83	1529.5	988.4	1053	870.333	993	1950.33	1663.67	2068	2241	1450.33	1760	2161.33	1741.67	7934.67	5503.67
Twist1	fatty_acid_marker	7.5	13	8.33333	8.33333	0	0	17.6	13.2	17	22.3333	23.3333	17	5.66667	8	166.333	174	369.333	319.667	217.667	163.333
Abhd3	fatty_acid_marker	1425.5	1621.33	967	1139.33	0	5.33333	2229.4	2159.6	7.33333	9.66667	1320	1386.67	1035.33	1244.67	210	317	155	214	60.6667	97.3333
Agt	fatty_acid_marker	1984.5	1948	3678	4466	167.667	211.5	6595.4	6762.6	10	0	181.333	129.333	8247.33	9310.33	4018.67	3707.67	553.667	116.667	95.6667	90.6667
Acot11	thermogenic_marker	1245.5	1447	1067.67	1167.33	334.167	388.667	4094.8	4415	297	308.667	1132	913.667	183.333	168.333	149.333	89.6667	102	2577.67	7428.33	27815
Epas1	thermogenic_marker	1151.5	1569	1271.67	1522	570.833	712.667	5815.2	5820	1412.33	1278	1155.33	927	2757	2327	2756	2777.67	4006.67	2580.33	6816.33	7921.67
Ces1d	fatty_acid_marker	0	6.33333	90	70.3333	85.1667	66.5	14	10.2	66.3333	40.3333	315.333	555.333	11289.7	16633.7	14342.7	25664	21386.3	20672	37335	31927.3
Impdh1	thermogenic_marker	763.5	877.333	597.667	724.333	1013.17	1310.17	1803.6	1773.8	493	510.333	236.667	193.333	71	61	403	443.333	527	492.333	6577.33	2307.33
Clic5	thermogenic_marker	171	188	162	177	39.1667	44.8333	505.4	440.6	2407	2108.33	10404.7	8869	142.667	93	326.667	443	466.333	814.333	6160.33	6481
Elovl7	fatty_acid_marker	393	457	365.333	461.333	315.667	338.667	2572.8	2167.2	44.3333	60.6667	2813	2492.33	6.33333	7.66667	51	100.333	23	23.6667	12	0
Faah	fatty_acid_marker	1220.5	1378.67	605.333	685.667	111.833	123.167	1485.8	1370.6	463	445.667	1412.67	1230.67	2498	2697.67	174.333	549.333	76	134.333	13.3333	0
Lpin3	fatty_acid_marker	31	22.3333	21.3333	31.3333	0	5.66667	79.8	69	209.333	183.333	1991.33	1817	125.333	165.333	168.667	426.667	237.333	198.667	126.667	128.667
Mlxipl	fatty_acid_marker	17.5	14.3333	26.3333	43.3333	0	6.66667	132.2	108	7.66667	7.33333	1629.67	1561	4312.33	4063.67	1172	1589	1415.67	3843.67	4015.67	7415.33
Ptgis	fatty_acid_marker	107	126.333	63.3333	76.6667	0	9.66667	138.4	136.6	233	204.333	61.3333	48.6667	30.6667	34.6667	322.667	397.667	131.667	100.667	70.3333	74
Aacs	fatty_acid_marker	1017	1252.67	780.667	926	939.167	954.5	1492	1537	593.667	542.333	2202.67	2221	955	1678	3421	9247	4584.67	8542.67	6155.33	17477.7
Aasdh	fatty_acid_marker	215.5	247.667	470.333	564.667	214.833	280.667	483.6	452.2	518.333	492	356.333	279.667	303.667	313.667	353	516	373.667	406.667	410.333	364
Abcd1	fatty_acid_marker	204	244.333	289.333	330.333	1856.67	1948.5	558.8	509	1058	992	1071.67	949	402.333	423	319	338	541.333	480.333	690.333	636.667
Abcd2	fatty_acid_marker	1268	1410	670.667	797	1265.83	1245.17	2118.2	2146.4	294.333	316.333	103.667	119.333	132.667	188	13981.3	11957	12290	9900.67	3280.33	1601
Abcd3	fatty_acid_marker	2100.5	2318	1506.67	1921	645.333	773	3139.6	2864	621.667	601.667	6488.33	6001.33	16215.7	16539.7	1606	2630.33	1636.67	3292.33	10637.7	9936.33
Abcd4	fatty_acid_marker	135	168.667	272	313.333	168.833	189.167	669.6	625.2	238.333	222	626	532.333	190.333	178.333	229	268	297	420.333	704	656
Abhd2	fatty_acid_marker	3057	3651.33	1893	2217.33	966.167	970.333	1121.4	1054	2601.33	2381.33	11569.3	9693	2263.67	1990.67	2764.67	16168.7	1367	758	598.667	553.333
Actn3	thermogenic_marker	30	38	27.6667	42	33.6667	35.8333	119	66.4	12.3333	10.6667	7	0	24.6667	0	98	74	1784	964.667	5863.33	3400.67
Dio2	thermogenic_marker	1544.5	1588.67	248.667	248.667	232	238.667	543.2	549.6	0	7	9.66667	16.3333	18.6667	0	27	102.333	31.6667	314	5621.33	2366.67
Abhd5	fatty_acid_marker	429	509.333	345	396.667	1894.67	1922.5	1150.6	1032	371.667	470.333	716.667	741.667	995.333	987.333	3060	3365.33	2964.67	3233.33	3699	3705.33
Acaa1a	fatty_acid_marker	670	660	899	1012	575.667	627	1247	1268.2	799.333	780.667	2192.33	1967	2126.33	2453.33	1013.33	1536.33	1327	1526.67	2186.67	1626.67
Acaca	fatty_acid_marker	1330.5	1593.33	1760.67	2043.33	343.167	363.333	1756.6	1616.4	665.667	615	1338.67	1556	1564	1548	5594.67	15911.7	13687.3	25973.3	28078.7	61453
Acacb	fatty_acid_marker	145.5	156.333	245.333	294.333	27.1667	37	613.2	556	383.667	330.333	545.333	397.667	3470.67	2990	5130	9939.33	9343.67	19528.7	40499.3	70308.3
G0s2	thermogenic_marker	118.5	117.333	79	88.3333	418.5	408.167	243	235.2	235	243	44	73.6667	911.333	1229	3056.67	3771	2012.67	3681.67	5395.33	2855.67
Adipor1	thermogenic_marker	1758	1971	1274.67	1465.67	8510	10340.5	2888	2682.8	4359.67	5107.33	3702.67	3617	2166.33	2543.33	2714	3761.33	2650.33	2687	5246.33	5388.33
Adrb3	thermogenic_marker	38.5	32.3333	45.6667	60.6667	0	0	29.6	26.2	10	11	65	100.333	191.667	132.667	11978.7	8434.67	9664.33	8448.33	5156	7097
Lama4	thermogenic_marker	214.5	275	233	261.667	70.8333	76.3333	355.6	311.8	218.667	196	1186.67	996.333	201	271.667	6853	5960.67	8676.33	4994.33	5042.67	4203.33
Gja1	thermogenic_marker	4316.5	4766.33	2877.33	3598.33	300.833	409.667	10280.8	9594	1329.33	1268	557	420	84	87.6667	1009.67	2318	634.667	1616.33	4099	4444.33
Lnpep	thermogenic_marker	2146.5	2970	3462.67	3968.67	2347	2418	1979.2	2033.8	4946	4446.33	5154.67	4003	1034.67	1098.67	5116	4422.67	3700.67	3149.33	4031	3021
Bscl2	thermogenic_marker	1620.5	1830	1591.33	1924.33	898.667	1041.67	2382.4	2441	805	809.333	546	498	741.667	846.333	3207.33	3954	3663.33	3772.33	3999	4318
Acad11	fatty_acid_marker	637.5	782	465	522.667	608.333	627.333	1216.2	1129.4	327.667	309.333	1701.67	1641.33	7168.67	8666.33	2109.33	3299	2532	3379.33	8430.33	9466.33
Acad9	fatty_acid_marker	914.5	1074.67	818	953	506.167	615.333	1450.2	1397	710.333	651.667	973.667	928.333	766.333	894.333	776.667	1205.33	921.333	992	1645	1902.33
Acadl	fatty_acid_marker	589	583	307.333	411	2022.67	2519.5	1909.4	1756.8	701.667	738	1631.33	1274.67	2147.67	2249.33	1697	2135.33	3177.67	6634.33	31114.7	29289.3
Acadm	fatty_acid_marker	677.5	731	590.333	681	773	924.5	963.8	935.8	780	775	2337.33	2325.67	4258	5395.67	3828.33	4649.67	5020	9394.33	43877.3	37799
Acadsb	fatty_acid_marker	1418	1609.67	2045.67	2378.67	583.333	563	2119.8	2026.4	728.333	631.667	696.333	548	3498.67	3954	5023.33	5946.67	4384.67	4551.67	6028	5073
Acadvl	fatty_acid_marker	637	687.667	591	644.667	1195.83	1514.67	2235.6	2159.8	516.667	550.333	1504	1379.67	4089.67	4804	1116	1718	2021.67	5043	26223.3	27530
Acat1	fatty_acid_marker	2203	2329.67	1763.33	2159.67	1219.5	1577.33	3026.6	2838.4	1147	1134.67	2138.67	2044.33	7080	8286.33	3146.33	4634	4307.67	6435.33	18671.7	16780
Acat2	fatty_acid_marker	476	609	501.333	542.333	187.5	246.5	1212.8	1138.4	159.667	191.333	480	503.333	801.333	792.333	623	1832.67	904.667	1914.67	2588.33	3773
Acly	fatty_acid_marker	6297.5	7257	4731	5628.33	4866.67	5346.5	14973.2	13745	5111.67	4611	4614	5373	7699	8363.67	7869	47491	23522	71987.3	59446.7	186436
Ndufa8	thermogenic_marker	1564.5	1680	825	1014	811	930.333	2354.4	2556.8	425	490	908.667	918.667	1034.67	1179	563.667	808.333	731	1288	3945.67	4367.67
Acot1	fatty_acid_marker	135	152.333	86	105.333	51.6667	43.6667	185.6	183.2	47.6667	51.3333	49.6667	22.6667	292.333	317.667	40.6667	93.6667	9.66667	19	195	70.6667
Acot2	fatty_acid_marker	103	97.6667	80	108	56	91.3333	126.2	121.6	211.667	218	112.333	72.6667	74.3333	58.6667	184.667	239	242.667	313	1489	1229.67
Acot6	fatty_acid_marker	139	167	183	234.333	17.6667	25.8333	129.8	120	51.3333	52	54	40	22	20.3333	110.667	153.667	86.3333	74	142.667	87.6667
Acot7	fatty_acid_marker	5585	6307.33	3327	4192	711.833	707.667	9557	9574.8	269.667	261.333	685	781.333	291	322	210.667	294	228.667	172.333	341.333	315.667
Acot8	fatty_acid_marker	164	188	176.667	207	343.167	405	251.6	239	276	240	498	422.667	238	238	127	179.333	153	201.333	280.667	288.667
Acox1	fatty_acid_marker	4831.5	5447.67	3774	4513.67	907.167	1012.17	5792	5308	917.667	957.333	9108	8977.33	49979.7	53557	9214	11971.3	12456.3	12361	21628.7	18397
Acox3	fatty_acid_marker	744.5	849	584	706.667	1823.17	1697.67	1731	1682	1983	1823.33	1705.67	1425.67	874.667	913.333	1056.67	4668.67	1069	1043	1480	1480
Acsf2	fatty_acid_marker	95.5	97	67.6667	101.667	157.167	219.5	494.8	465.4	311.333	304	405	436.667	1515.33	1100.67	121.333	150.667	277	402.333	568	915
Acsf3	fatty_acid_marker	383	371.667	346	442.667	205.5	260.333	685.6	647.8	252.667	215	563.333	449.333	543.667	509.333	368.667	396.333	508.333	700	1747	2643.33
Adcy3	thermogenic_marker	841.5	931.333	1321	1556.67	229.833	299.5	2117.2	2110.8	540	525.667	148.333	113.667	56.3333	51	260	311	632	792	3927.33	7368.67
Acsl3	fatty_acid_marker	4441	4549.33	3980.67	4924	189.5	222.667	8776	7825.2	333	348.667	1068.67	1060.67	597.333	698	206	744.333	238.667	606.333	1045.67	1430.33
Acsl4	fatty_acid_marker	1677	2199	1330	1590.33	1230	1473	1400.6	1325.4	1066	1038.33	571.667	423.667	2171.33	1738.67	1549.67	1929.67	600	707.667	624.667	783.333
Acsl5	fatty_acid_marker	1235	1516.33	795.667	945	4110.5	4897.5	1308.2	1265	2698.67	3163	15823	17965	7193.33	9819.67	1063.33	1299.67	1302.33	3713	9406.33	35883.7
Ogt	thermogenic_marker	3836.5	5080.67	5517	5981	7909.17	9063	8862.6	8099.4	7012.33	6220	6183.33	4934	1641.33	1607.67	3735.67	5856	3612.67	3985	3584	2452.33
Pald1	thermogenic_marker	328	332.333	397.667	475	43.3333	52	708.6	653	539	530.667	145.667	113.667	387.333	405.333	375.333	477	381.333	827.667	3480.67	3094.67
Cebpb	thermogenic_marker	45.5	53.3333	28.6667	37	452	413.5	49.8	52.6	203.667	258.333	113	127.667	575	568.667	162.667	441.333	432.333	678	3155	2013
Acsl6	fatty_acid_marker	5466	6024	5485.33	6494	70.5	123.667	8725.4	9232.8	79.6667	120.667	37.3333	25	6.66667	7.33333	9	32.3333	19	10.3333	36.3333	23.6667
Ndufs3	thermogenic_marker	715	751.667	516.667	557.333	285.333	330.333	914	946	469	450.667	620.333	586.667	735.333	805	505.667	727	633.333	1067.33	3137.33	2923.67
Adh5	fatty_acid_marker	1154.5	1265.33	845.333	967	939.833	1116.17	2051	1973.6	1288	1238.67	1136.67	1239	6664.33	8439.67	1825	3127.67	1511.33	1962.67	2616.33	2609.67
Aig1	fatty_acid_marker	1098.5	1267.33	877.333	1086.67	45.8333	62.3333	766.2	713.8	320.333	318.333	1231.33	975.667	232.667	213	222.333	413.667	175.667	205	518	611.333
Akt1	fatty_acid_marker	3357.5	3650.33	2161.33	2638.67	4467	5159	5847.2	5836.6	2387.67	2482.33	2142	1870.33	1017	1120.33	1366	1742	1637	1352	1979	1823.67
Akt2	fatty_acid_marker	984	1088	460.333	491.667	1187.33	1355	892	823.2	899.667	861.333	609.667	574.333	779.333	932.333	1734.33	1676.67	2393.33	2162.33	4373.33	4095.33
Aldh3a2	fatty_acid_marker	1338.5	1500.33	957	1167.67	1453	1438.17	2266.8	2109.2	1038.33	917.667	3452.33	3436.33	7836.33	7590.33	743.667	1567.33	716.667	647.333	908	984
Flcn	thermogenic_marker	1020.5	1247.67	1027.67	1142	1000.67	1097.83	1759.4	1744.6	952.333	1021.33	624.333	456.667	491.333	675.333	642.333	823.333	906.333	1124	2674.67	2257.67
Alkbh7	fatty_acid_marker	357	387.667	220.333	302.667	95.5	113.167	355.6	373.6	141.667	128.333	208.667	186.667	200.333	245	97.6667	187.667	139	174	562.667	544
Alox12	fatty_acid_marker	16.5	19	24.3333	22.6667	2654.33	3325	25.8	27	304	422.667	25.3333	21.3333	15.3333	25	80.6667	262	33.6667	57	43	120
Angptl3	fatty_acid_marker	11	12.6667	113.333	112	5.33333	5.83333	27.6	18	46	37	150.667	116	7483.33	9438.33	117.667	134.333	68.6667	78	65	49.3333
Ankrd23	fatty_acid_marker	31	37.6667	142.667	181.667	96.1667	99.6667	229.8	219	196.667	161.333	113	80	76.3333	62	112.667	111.667	546	367.333	1801	1042.67
Gnas	thermogenic_marker	1039.5	1184.67	2706.33	3323.67	11358.8	14132.8	54236.6	55879.8	540.333	484	224.667	179.333	95.6667	104	160.333	337.667	293.667	290.667	2556.67	951.333
Ankrd26	fatty_acid_marker	503.5	628.333	889.667	1072	391.333	502.333	763.6	804	542.667	580	382.667	359.333	217.333	218	207.667	338.667	232.667	260.333	192	191.333
Atf4	thermogenic_marker	2845	3407	1577.67	1764.33	4832.33	6583.33	3290.8	3361	2784.33	2907.33	3544.67	3917	1740.33	2416	1233	2441.67	1319.33	1629.67	2531	2050.67
Apc	thermogenic_marker	8402.5	10511.7	8999.33	10188	1444.83	1784.5	10644.2	9877.2	3454.33	2998.67	5787.33	4758.33	1471	1403.33	2467	2829	2481	2196.67	2273.33	1999
Npr3	thermogenic_marker	236	350.333	172.333	200.667	8.83333	7.5	288.4	237.4	29.6667	27.6667	150.667	124	78.6667	77.6667	15500.3	5230	7839	2797.33	2266	3339.33
Mrpl34	thermogenic_marker	434.5	456	222.333	258.333	408.833	494.333	512	506	288	325.333	417.667	412.333	481	558.333	215.667	369.333	329	607	2255.67	2410.67
Dhrs7b	thermogenic_marker	393.5	458.667	287	320.667	197.667	235.833	528.4	526.6	269.333	265	963.667	1034.67	336.667	367	669.667	1035.67	998.667	1067.67	2194.33	1696
Acot13	thermogenic_marker	731.5	827.667	440.667	568	243.5	301.333	1254.2	1184	220.333	205.333	401.667	396	483.667	574	255.333	524.667	329.667	696.333	2095.33	1833.67
Ip6k1	thermogenic_marker	5476	6298	6215.67	6784.33	5088	6250.33	7621.2	7345	3517.67	3656.33	2808.33	2650.33	1309.67	1289.67	1661.67	2262	2105	1819.33	2053.67	1578.33
Ebf2	thermogenic_marker	94	86.3333	104.333	133.333	5	8.16667	787.8	650	0	0	8.33333	7.33333	7.66667	0	719	549	963.333	648.667	1998.33	1195.67
Aoah	fatty_acid_marker	5.5	6	7.33333	8.33333	848	799.167	11.6	12.2	157.667	177.667	133	89.3333	43.3333	40	109	92	197	163.333	36.6667	49.3333
Asah2	fatty_acid_marker	585	653.667	626.333	794.333	159	183.333	2685.6	2631.4	302.667	324	2052.67	1875	425	429.667	611.333	724	748.667	589.333	653.667	542.333
Auh	fatty_acid_marker	1393.5	1567	1023.67	1241.33	382.833	417.167	1928.8	1922.8	620	585.667	685.667	541	648.333	729	906.333	1080.67	1310	1378.33	2448.67	1936.33
Nrd1	thermogenic_marker	1396	1651.33	1941.67	2405	5165.67	5882	5825	5550.6	2443	2246.67	2195	1913.33	1287.33	1287	1861.67	2184.67	1897.33	1754.67	1908	1841.67
Brca1	fatty_acid_marker	74.5	68	58.3333	73	2667.17	3340.67	125.2	107.2	1122.33	1528	782	691	50	47.3333	36.3333	72	40	53.6667	21.3333	18
C3	fatty_acid_marker	68	89	148.667	98.3333	19727.7	16742.3	3276.8	2721	15377.7	14542	2570.33	1827	148961	173589	12162.7	18648.7	25836.3	11185.7	23816	19520.7
Notch1	thermogenic_marker	709.5	868	1317.33	1458.33	3151.17	2979.83	1452.6	1344.6	1763.67	1852.33	1396.67	1172.33	1005.67	812.333	1822.67	2550	2578.67	1482.33	1795	1330.67
Cbr4	fatty_acid_marker	282	291.333	250	330.333	97.5	124.833	253.8	241.2	183.667	170.333	355	284.333	504.667	567.667	566.333	796.667	502	1024	1548.33	1668.33
Hdac3	thermogenic_marker	1320.5	1442.33	1593.67	1882.67	1122.33	1366.83	2813.8	2576.4	897.333	836	1308	1144.33	557.667	730	968	1407.33	1083	1038.33	1414	1116
Cpt1a	fatty_acid_marker	1030.5	1091.33	630	758	3112.17	3544.83	2230.8	2022.6	2169.33	2416.33	5755	3451.33	6597	6967.33	1144.67	2024.33	1160	513.333	463.333	350.667
Cpt1c	fatty_acid_marker	1489	1666.33	1563.33	1795.33	38.6667	61.5	1976.4	1941.8	52.3333	51	68.6667	46.3333	7.66667	7.33333	111.333	142.667	133.333	92.6667	36.6667	41.3333
Crat	fatty_acid_marker	905	1065.67	803	964.667	2102.33	2584.67	1515.4	1419.6	887.667	1066.33	1312	1376.33	1173	1027	3824.67	4960.33	5659.67	7082	21276.3	19597.7
Crot	fatty_acid_marker	850	867.333	531.333	612	809.333	844.333	1371.8	1304.6	821.333	746	2929	3092.33	17718.7	22017.3	1770.33	1660	1062.67	1462	1809	1925.67
Sorl1	thermogenic_marker	10213	12628.3	5897.33	6718.67	10463.2	9476.67	9024.2	8910.4	7232	6670.33	3699	2426	62	72.3333	682.667	1976.67	1953.33	3520.67	1363.33	7754
Arrdc3	thermogenic_marker	1272.5	1552.67	1310	1638	1578.83	2250.17	3418.6	2956	1752	1412.67	1263.33	1068.33	2671.67	5078.67	1728.67	2246.33	1255.67	1433.67	1271.67	1022.33
Ehmt1	thermogenic_marker	1186.5	1332.67	1122.67	1328.33	1122.67	1405.67	993.6	914.4	1470	1294.67	1590.67	1356.33	846.333	799.333	920.667	1320.67	1067	1065.33	1209.67	1064.33
Cryl1	fatty_acid_marker	225	247.667	112.667	123.333	282	345.833	201.4	190	184	179	1553.67	1426.33	279.667	362.333	176	280	169	113.667	186	120.667
Gadd45g	thermogenic_marker	193.5	241.667	169.667	189.667	178	217.667	439	461.6	71.6667	68.6667	221.333	168.667	379	225	395.667	416	231.333	187.333	1190	355
Cygb	fatty_acid_marker	1116.5	1231	1220	1453	20.6667	26.8333	2962.4	2968.8	168.333	134	197.333	150.667	92.6667	116	425	575.333	943.667	559.667	437.333	318
Cyp1b1	fatty_acid_marker	132	130.333	77.3333	82	296.333	370.167	207.6	152.2	1927.33	1534	188.667	172	14.6667	18.3333	987	1184.33	605.333	378.333	259.667	235.667
Cyp4v3	fatty_acid_marker	208.5	225	174.667	201	228.833	242.5	349.4	315	549.333	501	2892.67	3020.33	9969	12813.3	832.333	753.667	1076	1003.67	1325	896.667
Dbi	fatty_acid_marker	3059.5	2897	2274.67	3097.33	854.5	917.167	6080.4	5650.8	591.333	569	5157.67	5492.67	9338.33	12266	16193	17211.7	17813.7	24101	29915.7	33133.7
Decr2	fatty_acid_marker	491	570.333	479.333	620	106.5	123.667	721	661	205.667	200	960.667	901.333	3645.33	3983	359	453.667	385.333	520.667	1524.67	1839
Degs1	fatty_acid_marker	1997	2255	1310.33	1654.33	3301	3458.67	4136	3780.8	1308	1288.33	494.333	442.667	1315	1603.33	1363.67	1615.33	1312.67	992.667	908.667	913
Id1	thermogenic_marker	189	201.667	97	136.333	231.333	221.5	364	346	158	178.333	1476	1719.67	67.6667	73.6667	470	272	456.667	263.333	1128	492.333
Dgat1	fatty_acid_marker	404.5	421.333	659	758	2590.67	2276.17	660.4	591.6	474	466.667	7864	8534.67	441.333	499	3012	3758	4155	4237.33	7720.67	5547.33
Jak2	thermogenic_marker	1011	1217.67	1267	1407.33	3364.5	4097.33	1633.2	1545.6	3954.33	3696.67	5357.67	4683.67	505	586.333	1199.67	1839	1168.67	1296.33	1071.67	1006.33
Dgat2	fatty_acid_marker	1126	1193.33	419.333	504.667	855.167	774.833	631.8	543.6	139.333	134.333	1881	1981.67	6702.33	9160.67	22178	24935	21756	24933	47360.3	28695
Ech1	fatty_acid_marker	987	957.667	632.333	747.333	1433.67	1613.5	1558.2	1409.8	1122	1111	2831	2692.67	4780.33	5895.33	5239.33	5660.67	5522	7982.33	26770.7	26333
Adam17	thermogenic_marker	406	478	520.667	605.667	1682.67	1839.17	968.6	874.8	2612.33	2358	1591.33	1391.33	582.667	652.333	779	1098.33	1043	1026.33	1056	1098
Echdc1	fatty_acid_marker	221	220.333	192	245.667	225.333	305.833	1662.2	1517.2	125	117	336.667	368.333	470.667	543.667	501.667	1445	970	2451	1829	2792.33
Echdc2	fatty_acid_marker	114	119	106.667	143.667	8.16667	8.66667	234.6	215.4	19	16.6667	345	290.333	3203.67	3781	954.333	2639.67	832.667	646	559.667	512.333
Cycs	thermogenic_marker	296.5	339.333	223.667	256.333	49.1667	45.6667	246.4	212.2	124	115.333	412.333	422.333	138.333	148.667	163	213.333	153	614	1051.67	1382.67
Kdm3a	thermogenic_marker	1134.5	1354.67	998.667	1111.33	1594.17	1878.33	1226.2	1201.6	1942.33	1901.33	1902.67	1661.67	609.667	715.333	892	1590.33	962.667	1039	1037.33	782
Nr1d1	thermogenic_marker	626.5	599	333.333	474.333	54.8333	63.6667	2480.8	1553.2	60.6667	85.6667	523.333	103.333	260	532.667	1067.67	267.333	1261.67	386.333	1003.67	557.667
Echdc3	fatty_acid_marker	29	31.3333	24.6667	29	6.16667	6.66667	61	51.4	31	31.3333	34.3333	22	1138.67	1464.67	461.667	524.667	508.333	479	1477.33	1113
Echs1	fatty_acid_marker	1017	1123.67	755.333	882.667	759.667	797	1937	1932.8	629.333	625	1880.33	1738.33	3680.33	4479.33	3158	4354.67	4179.67	5911.67	15840.7	14928
Eci1	fatty_acid_marker	316.5	325.667	261.667	310.333	236.167	294.5	637	639.6	343.667	328.333	724.333	730	1983.67	2310	1396.67	2163.33	2159.33	3743	12487	9872.67
Eci2	fatty_acid_marker	649	671	533.667	618.333	746	935.333	1073.4	985.4	610	648	999.333	813.667	2804.33	3322	1085.33	1491	1227.33	1601	3553.33	3328
Lgr4	thermogenic_marker	772.5	1067.33	714.333	784.667	58.1667	54	891.6	879.8	134	137	6277.67	5365	2056.67	2044.67	1380.33	1441.67	767.667	653.667	940	804
Ppif	thermogenic_marker	364	381	263.667	334.333	932.167	1175.67	1005	1058	324.667	377.333	634	519.667	418	411.667	128	213.667	169.333	376.333	929.667	1086.67
Dock7	thermogenic_marker	1226	1470.33	1854	2073.33	455.333	513.833	1665.8	1548	858.667	839.667	3230.33	2481.33	418	449.333	1478	2510	1299	967	923.333	653
Irf4	thermogenic_marker	9.5	12	10.6667	13	1320.67	1934.17	18.4	17.2	2081.33	1779.33	874.333	465.333	12.3333	13.3333	210	242.667	583.333	529	893.333	723.667
Kdm1a	thermogenic_marker	1395.5	1614.67	1357.33	1616	1374.83	1685.17	1584.8	1582.4	1396.33	1463.33	1665.67	1393.67	395	465	640	980	734.333	650	842.667	645.333
Appl2	thermogenic_marker	1363.5	1443.67	1904	2248.67	363.833	435.333	4594.4	4134.8	988	968.333	1938.67	1722	451.333	512.333	964.667	1419	1239	1174	826.333	729.667
Fahd1	thermogenic_marker	281.5	317.333	223.667	259.667	626.167	894	469.6	428	212	281	1339	1278.67	729.333	960	140	208	176	296.667	823.333	1074.33
Adrb1	thermogenic_marker	239.5	359.333	106.667	130	5.83333	8.83333	111.2	123.2	130	127.333	26.3333	23.3333	14.3333	15.3333	65.3333	198.667	85	121.333	790.333	494.667
Pgam5	thermogenic_marker	906.5	993	819	974	554.833	725.667	1068	1032.2	702.333	690.333	678.667	654	368.667	426.667	409.667	709.667	463	578.333	770.333	676.333
Ffar4	thermogenic_marker	0	0	0	0	0	0	0	0	34.3333	26.3333	142.667	181.667	0	5.33333	308.333	317.667	300	223	738	516.667
Adamts5	thermogenic_marker	96	108.333	84	101	92	142	419.2	479.6	509.667	445.667	92	77.3333	66.3333	53	5922	3115.33	3723.33	2010.33	710.667	558.333
Ehhadh	fatty_acid_marker	99	100.333	86	97.6667	101.167	147.667	183.6	164	141	139	1615.67	1478	7461.33	8274.33	1121.33	1604.67	1697.33	1481	4306.33	3005
Abhd6	thermogenic_marker	625.5	723	274	331.667	30.1667	39.1667	1332	1356.2	144.333	120.333	1185.67	1050.67	740	595.333	183	261.333	237	336	673	680.333
Eif2ak3	fatty_acid_marker	713.5	817	582.333	742.667	1300.33	1581.67	1194.8	1129.8	1703.33	1585.67	1952.67	1771	408	411	484.667	823	626	516	557	508.667
Eif6	fatty_acid_marker	799	915.667	531.667	611.667	1114.5	1292.67	1180.6	1207.4	885	938.333	3054.33	3276.33	686	777.667	474.667	707.667	519.667	520	620	650
Lep	thermogenic_marker	0	0	0	0	0	0	0	0	0	0	23.6667	48.6667	0	0	12549.7	6945.67	8028.33	4782.67	648	757.333
Grb10	thermogenic_marker	1644	1974.67	4619.67	5410	218.333	246.167	2933.6	2789.8	518.667	495	284.667	198.333	190	190	924.333	1193.33	1379	888.667	643.667	498
Elovl1	fatty_acid_marker	249.5	246	201.667	233	1611.5	1840.83	1627.4	1414.4	612.667	727.667	2485	2318.33	774	733	336	358.667	317	242.667	135.333	147.333
Elovl5	fatty_acid_marker	1970	2259.67	1801.33	2120.33	1344.33	1411.5	5232.6	4719.2	1800.67	1634.67	1519.67	1296.67	5971.33	7746.33	1289.33	3502.33	1983.67	3200.33	3539.67	8793.33
Elovl6	fatty_acid_marker	1054.5	1328.67	1599	1995.33	379.833	475.5	3239	3089.8	250.333	225.333	3059.67	2929.33	1926	1769.33	749.667	5018.33	3686	19892.7	18324.3	53177.3
Pm20d1	thermogenic_marker	73	82.3333	27	33.6667	0	0	375	343.4	0	7.66667	1444.67	1059	2133.33	2236.33	51.6667	62.3333	46.3333	135.667	615	579.667
Esrrg	thermogenic_marker	787	1017.67	319.667	414.333	0	0	2341.2	2053.4	30	26	126.667	114.667	67.3333	54.6667	52.6667	113	21.3333	87.6667	584	453.333
Kdm6b	thermogenic_marker	130	225	249.333	257.667	2322.33	2249.33	1196.4	1202.4	351.667	348.333	799	583.333	308.667	210	459	399.667	414.333	294.667	516.667	265
Aldh1a1	thermogenic_marker	2482	2546	1251	1635	2606.33	3600.5	6585.4	6319.4	971.333	1356.33	3251	4383	24257	24708	3955	8233.33	1535	995.333	508	328
Igf1r	thermogenic_marker	1746	2090.67	2346.67	2672	2912.67	2894.5	2207.8	2046.4	634.333	791.667	1265	898.333	109	98.6667	871	3141.33	768.667	501.667	491	395.333
Il4ra	thermogenic_marker	194	225.667	259.333	283	1590.5	1606.33	329.8	303	3985.33	3574.67	2641.67	2151.33	894	995.333	752.333	1579.33	1410.33	1277	469.667	489
Ddit3	thermogenic_marker	395.5	434.333	298	332	445.5	599	494	493.6	340.333	316.667	267	287.333	109.667	119.667	204	344	222.667	335.333	438.333	506.667
Hsf1	thermogenic_marker	477	511	554.667	608.333	582.167	730.667	1094.2	1090.4	649.667	572.333	423	414.667	231.333	258.667	293	395.667	336.333	328.333	437.333	403.667
Cnot3	thermogenic_marker	222	273.333	460.667	549.667	1464.83	1760.5	849.6	845.4	857.667	857	790.667	724.333	270.333	233.333	415.333	475.333	466.333	498.667	424.333	318
Pgk1	thermogenic_marker	219	232.667	156.667	168	134.333	137	350.6	339.6	69	73.3333	149.333	200.667	186.333	186.333	47.3333	65.3333	63.6667	143.667	373.667	525
Erlin1	fatty_acid_marker	356.5	449	350	375.667	1173.17	1123	475.6	487.8	520	501.333	1788	1549	842	1234.33	452	421.333	426.333	311	282	193.333
Erlin2	fatty_acid_marker	1050.5	1195.67	1339.67	1665.67	868.333	960.667	1855	1670.2	1217.67	1230.67	3512.33	2920.67	743.333	813	1022.33	1564.33	997.333	883	1772.33	1635
Fads1	fatty_acid_marker	4066.5	4378.33	4181	4778	1027	1522.83	9276	9003.2	691	770	611.333	534	7849.33	7134	2268	3725.67	1301.33	1371	395.333	407.667
Fads2	fatty_acid_marker	2387	2396.67	2118.67	2503	373.167	585.833	3517	3451.4	170.667	215.333	1556	1379.67	4933	4887.33	1008	1793.67	111	167	125.333	126.667
Fads3	fatty_acid_marker	428	461	577.333	699.333	349.667	466.667	767.8	720	346.667	409.667	642.667	545	455.333	556	3731.67	3027.67	3056	1638.67	456.333	477.333
Fads6	fatty_acid_marker	986	1056.33	924.333	1122.67	18	15.8333	654.2	667	77.3333	79.6667	46	35.3333	3197	3365.33	225.667	153	138.333	108	81	81.3333
Pctp	thermogenic_marker	48	48	35.3333	44.3333	321.167	383.167	182.6	172	234.333	236	304.667	262.667	1854.67	2222.33	94.3333	683.333	133	205	336.667	500.667
Fasn	fatty_acid_marker	8121.5	9014.33	10325.3	11944.3	1665.5	2045.5	13750.2	14414.8	3692.67	3088	5615.33	8918.33	14690.3	15921	56255	199649	192459	287562	390103	899338
Gcdh	fatty_acid_marker	619	700.333	589	665	553	722.5	1013.4	961.6	466	505.333	634	526	11009.3	13024	623.333	1043.33	787.667	797	2100	1495.33
Ccr2	thermogenic_marker	12.5	17.6667	25	19.3333	4921.17	4483.33	26.8	27.4	1064.67	1146.67	314	192.667	23.3333	34.6667	1353.33	1236.67	1276.33	1306.67	317.333	201.333
Ggt5	fatty_acid_marker	52.5	58.6667	57.3333	73	402.167	377.167	155.8	135.8	478.667	461.667	232.333	152	40	53.3333	384.333	391.667	686.667	422.333	141	111.667
Gnpat	fatty_acid_marker	1215	1366	997.333	1220.33	1734.17	2056.17	1996	1944.6	1492.67	1476.67	1112.33	974	973	1074	3427	3534	4170.67	4128.33	8686.67	6517.67
Gpam	fatty_acid_marker	1755	2116.33	1511.33	1791.67	545.667	832.167	2728	2713.8	494.667	461.667	526	511.333	4636	6149.33	5318.67	8317.67	4241.67	5691	13437.7	16120
Gstm4	fatty_acid_marker	121.5	95.3333	83	105.667	151.167	146.5	303.2	246.2	49.6667	51.6667	59	53	666.333	727.333	192	191.333	137.667	142	232.333	316.333
H2-Ke6	fatty_acid_marker	376.5	372.667	407	473.333	593.667	651.667	620	597.2	818	790.333	403.667	375.333	956.333	1169	649.333	873	808.333	932.667	2010	1936.33
Hacl1	fatty_acid_marker	216	205	153	214.667	204.667	222.5	404	348	181	213.667	287.333	274.333	8148.67	9771.33	427.667	655	748	1038.33	1290	1403
Per2	thermogenic_marker	347	492.333	515.333	560.333	429.667	408.5	604.8	635.6	201.667	217.667	583.333	988.667	221	230	265	244.333	224.333	146.667	299	187.333
Hadha	fatty_acid_marker	2059	2276	1454	1768.67	3200.67	3950.83	3715.4	3575.6	2538.67	2605	6349.67	4960	7108	8095	2687	4342	4614.67	10729.3	44413.3	55495.3
Hpgd	fatty_acid_marker	145.5	136	82	89.6667	457.5	631.333	334	315.6	1768.33	1523.67	2640.67	2671.67	1432	1696.67	2762	1019.33	626.333	604.333	157.333	172.333
Hpgds	fatty_acid_marker	90.5	106	235.333	301.667	199.167	295.167	195.6	138.6	884	881.667	381.333	233.333	33.6667	41.3333	233.333	220.667	319	372.667	116.667	167
Arntl	thermogenic_marker	860.5	1059.67	756.333	733.667	469.833	655.833	541.6	604	756	580.333	1763	1854	892.333	716.333	350.667	753.333	321.667	701	297	689.667
Alms1	thermogenic_marker	771.5	951	1368	1572.33	696	845	449.4	400.8	960	1132	1018.33	876	180.333	191.667	428.667	673	475.333	443.333	277	200.333
Hsd17b10	fatty_acid_marker	458	490.667	306	350.667	641.5	724.5	823.2	760.2	454	431	682.667	712	2034.33	2125	1070	1568.33	1157.67	1292	2578	1798
Hsd17b4	fatty_acid_marker	1724	1911	1182.67	1413	1106.33	1256.67	2766.4	2692.8	1302.33	1270	2370	2412	9658	11286.7	3587.33	4584.33	3773.67	4427.33	8174.67	9625.33
Ilvbl	fatty_acid_marker	585	589.667	407.667	490.333	429.333	507.333	1630.8	1410.8	472	492	2074.67	1812	425	484.333	421	535	361	314	650.333	515.333
Insig1	fatty_acid_marker	1454	1640.33	1371	1717.67	257.5	352.167	3023.4	2784.6	620	539.333	2197	2557	4539.67	7925.33	1334	8641.33	3305.67	12277.7	7339.67	11806.3
Insig2	fatty_acid_marker	915	969	610.667	743.667	329.5	388.167	1751	1641.4	369	318.667	1840	2151	6514.67	6264	749.667	677.667	624	582.667	548.333	616
Oma1	thermogenic_marker	440	448.667	214	244.333	289.667	312.833	263.8	249.4	421.333	381.667	520.667	474.333	378	443.333	256.333	394.333	233	224.333	274.333	277
Adrb2	thermogenic_marker	40	49.3333	36.3333	43	1297	1681.17	52.4	49	698	737	86.3333	54	16	25.3333	122	101.333	281.667	182.667	264.333	186
Irs1	fatty_acid_marker	485.5	618.333	664.667	689.667	69.5	95.1667	798.2	769.6	190.667	186	160	134	1044	861	1459	1400.67	2319.67	1751	1796.33	1167
Irs2	fatty_acid_marker	1523	1972	1685	1952.33	414	529.167	1446	1460	953	1089.67	1197.33	968.333	1505.33	1026	1901.67	1106.67	1422.33	583.667	3570.67	714.333
Ivd	fatty_acid_marker	1412.5	1595	1715.67	2079.67	696.167	788.167	2367.8	2288.6	1011	1005	861	661	4170.67	4634.33	3595.33	4353.33	5307	4020.33	7030.33	5352
Lipa	fatty_acid_marker	515.5	594.667	535.333	585	1805.67	2024	1113.6	1053.6	2249.67	2512.33	1090	861.667	4270.67	4758	824.667	873	1196	1214	2938	4450.67
Sctr	thermogenic_marker	8.5	6.66667	23.6667	22.6667	0	0	34.8	33.2	0	0	10.6667	10	0	0	250.333	145.667	283	216.667	258.333	111.667
Cmklr1	thermogenic_marker	54.5	51.6667	41.6667	61	108.333	116.667	196.6	149.2	417	450.667	110.667	91.3333	63.3333	73.6667	1234.33	1451	1776	1192.67	248	310.333
Plcl2	thermogenic_marker	3211	3695.33	1908.33	2305	3448.5	4254.17	998	969.2	3247.67	3359.67	2506.67	2085	381	444	319.333	435.667	640.667	605.333	209.333	141
Lipe	fatty_acid_marker	280	286.667	369	445.333	614	611	623.2	568.8	620.667	580	1154.33	1099.67	429	384	20151.7	16994.7	26023	16701	30473	27846.3
Mrps36	thermogenic_marker	25	35	22.3333	20.3333	18.3333	21	19.4	20.8	25.3333	20.6667	33.3333	38.3333	14	11.6667	19.3333	23	25	38	180	141
Pemt	thermogenic_marker	34.5	37.6667	44	45.3333	21.3333	25.3333	75.2	65.2	22	17	32.3333	37	3190	4021	108.333	760	97.6667	90	126	102.333
Map2k6	thermogenic_marker	239	328.667	175.333	173.333	152	194.167	274.8	264.4	227.667	199.667	255.333	204	73	97	69.6667	110.333	76.6667	127	125.333	93.6667
Lipg	fatty_acid_marker	60	103.667	18.6667	27.3333	100	90	6.2	7.2	6.66667	6.33333	240.333	236	257.333	221.333	83.3333	1925.33	52	57.6667	115	147.333
Il15	thermogenic_marker	24.5	33	26.6667	30.6667	229.833	193.5	37.8	33.6	175	175.333	434	439.667	25.6667	32.6667	142	146.667	189.333	191	124	113.333
Lonp2	fatty_acid_marker	2527.5	2801.67	2092.67	2546.33	1377.83	1481.83	2918.6	2749.8	1585.67	1529.33	2394	2161	9371	11279	2318.33	3414.33	3196.67	2801.33	5418.67	5044.33
Nova2	thermogenic_marker	827.5	924.667	417.667	471	6.33333	7.83333	1531.4	1439.2	41.6667	28.3333	24	21	20.3333	19	140.667	123.667	109.333	78.6667	117.667	66.6667
Acvr2b	thermogenic_marker	88	123.667	340.333	391.667	13.3333	20.6667	129	137.2	43.3333	39.6667	131.667	113.333	79.6667	87.6667	108	103.667	97	71.3333	116.667	82.6667
Nova1	thermogenic_marker	884.5	1121	2003.67	2340.67	0	0	4035.2	3825.2	28	23	50.3333	41.3333	0	0	303.667	239.333	696.333	530.667	106.667	101.667
Plcl1	thermogenic_marker	983	1133.67	1155	1592.33	41.3333	48.6667	2972.8	2628.6	192.333	168	148.667	107.333	21	25	289.667	605.667	185.667	73.6667	92.6667	74
Pdgfc	thermogenic_marker	102.5	124	112.667	127.333	63.3333	100.667	194.6	176.2	57	59	347	362.667	131.333	135.333	330.667	335.333	366.333	243.667	89.3333	83.3333
Lpgat1	fatty_acid_marker	5535	6726.67	4609.33	5464	2228.5	2207	6858	6593	2314.33	1941.33	4097.33	3477.33	5039	4563	15010	6769	7278.33	4285.67	2354.33	2756
Lpin2	fatty_acid_marker	1740	2112.67	2476.33	2793.67	3839.33	5025.83	2713.2	2640.6	2375	2740	6797.67	7052.33	4956	5661.67	413	842.667	458	490	437.333	565
Lpl	fatty_acid_marker	209.5	226	35	37.6667	1361.17	2133.5	205.4	169	576.333	510.333	538.333	738	566	522.667	86801.3	68893.7	80220.7	55734	62589.7	54509.3
Gatm	thermogenic_marker	1984.5	2220.67	1423.33	1745.33	1251.33	1407.17	9120.4	8146.8	635	803.667	147	68.6667	128.667	192.333	98	138	129.333	116.667	61	41
Ltc4s	fatty_acid_marker	56	66	21	28.3333	12.3333	18.8333	46.8	40	124	100.333	49.3333	45.3333	9.66667	9.33333	545.333	587	605	715	221.333	324
Hoxa2	thermogenic_marker	12.5	14	0	0	0	0	105.6	93.6	37.3333	25.6667	11	7	13.3333	9	43.6667	48.6667	25	30	53.3333	46.6667
Prlr	thermogenic_marker	241	319	1055.67	1199	8.5	9.66667	448.6	410.4	42.3333	47.6667	5064.67	4258	1920.33	1898.33	1566.33	1442.67	327.333	285.667	49.6667	90
Lypla1	fatty_acid_marker	440.5	547.667	401	462	753.667	782.333	763.6	729.2	954.667	789.333	4777.67	4157	2462.33	2697	1475.67	1537.33	1203.67	2156	2742.67	3247
Ghrl	thermogenic_marker	18.5	21.3333	110.667	134.333	0	0	0	0	79.6667	69.6667	91.3333	72.6667	16	12.3333	42.3333	51.3333	41.3333	51	46.6667	24.3333
Ache	thermogenic_marker	1423.5	1544.67	2780.33	3341	2114	2899.17	6269.6	6030.4	217	298	90.3333	72.3333	11	11.3333	12.6667	18.6667	23	16.3333	41	25.3333
Lypla2	fatty_acid_marker	800.5	866.667	547	674	1523.67	1658.83	2123.4	2133.8	731.333	774.667	1031.67	924	542	596	338.333	454.667	465.333	375	584.333	489.333
Mapk14	fatty_acid_marker	1374	1713.33	1210.67	1335.33	5811.17	6162.5	2004.2	2033.6	3156.67	3145.33	1897	1714.67	1556.67	1710	1124.33	1649.33	1519.67	1593.33	1560	2333.33
Cxcr4	thermogenic_marker	44	49	39	32	6282.5	7446.83	95	104.2	1794.33	1742.67	218.667	170.667	7.66667	10.3333	41.3333	78.6667	99	174	26.6667	46.3333
Lepr	thermogenic_marker	127.5	170.667	253	256.333	716.167	957.167	201	182.4	1005.67	806	760	519.333	57.3333	82.6667	104.333	199.333	106.667	142.333	22.6667	13.3333
Oxtr	thermogenic_marker	122	159.667	160.333	194	0	0	235.6	215.2	7.66667	8	12	15	0	0	842.667	933	217.667	240.333	19.6667	75
Mcat	fatty_acid_marker	275.5	314.667	273.667	345.667	229.833	308.333	398.8	358.6	286	295.333	250.667	217	443.333	541	341.333	505.333	415.667	495.333	970.333	1040.33
Mecr	fatty_acid_marker	284	324.333	279.667	348.667	247	330.5	537.4	534.2	283.333	309	559.333	501.667	549	583.333	664.333	771.333	814.667	1381	3953	3815.33
Plac8	thermogenic_marker	0	6	0	0	6799	6223.67	16.4	20.2	3142.33	3253	12645.3	14481.7	80.3333	108	994	1914	415.667	474.333	19.3333	20
Il18	thermogenic_marker	270	251.667	223.333	278	137.833	180.333	563.8	529.6	554.333	547	262	230.333	144.333	185	102.667	87	118.333	119.667	18.6667	10.6667
Mgll	fatty_acid_marker	3226.5	3639.33	750.333	895.333	2374.83	3202.5	2148.6	1850.8	1160.33	1369.33	571.667	536.333	4018	3378.33	15440.3	14363	14583.3	15379.3	18223.7	26726.3
Mid1ip1	fatty_acid_marker	2150.5	2207.67	2021.33	2360.33	1756.5	1988.17	5621.6	5562	531.667	590.667	793.667	776.667	721	1224.67	783.333	3220.67	539.333	1468	719.667	2182.33
Mlycd	fatty_acid_marker	562.5	558.667	393.333	507.667	227.333	261.167	702.4	661	314.667	307	530.333	424.333	1665.67	1850.67	471.333	767.667	751	1025.33	2583	3475
Mtor	fatty_acid_marker	3790	4612.67	3768	4386.33	1388.33	1675.83	4151	4124.2	1941	1793.67	2143.33	1722	1670.33	1733.33	1686.33	2518	2086.33	2412.67	6538	10397.7
Mfap2	thermogenic_marker	25	23.6667	73.6667	96.6667	7.33333	11.1667	66.8	59	12.3333	15.6667	18.3333	11.3333	0	0	27	35.6667	71	37.6667	18.3333	12
Il18r1	thermogenic_marker	0	0	0	0	488.833	433.167	0	0	531	549.667	187	124	9.66667	10.6667	75	79.3333	181.667	163	16	13.6667
Myo5a	fatty_acid_marker	11255.5	14499.7	11191.7	13207.7	3154.33	2966.33	12912.8	12558.8	2966.33	2541.67	1032.33	588.667	46.3333	37.3333	1791.33	1611	2688.33	2987.67	3055.67	5856.33
Lcn2	thermogenic_marker	16	26	5.33333	0	51815.5	43500.8	105.6	134.8	56.6667	331.333	22.3333	22	90.6667	51.6667	365.667	11636.3	28.6667	8.66667	11	12.3333
Naaa	fatty_acid_marker	606.5	640.333	437	512.667	1097	986.333	797.2	686.2	1525.33	1449.67	503.333	432.333	63.3333	66	854	774	1210.33	630.667	572.333	271.333
Ncor1	fatty_acid_marker	3993.5	5008	4694.33	5427	6811.33	7857.67	4257.6	4047.2	6967.33	6375.33	10074.3	8711	3406.33	3205	5088.33	5683.67	5891.67	4442.33	5400.67	4157
Ndufab1	fatty_acid_marker	127.5	164	341	381.667	42.5	55.5	73.2	67.2	405	372	644	553	279	258.333	398.667	519.667	448	942.333	1709.67	2500
Ndufs6	fatty_acid_marker	585.5	646	359	439	430	518.5	964.6	1053.6	271	308.333	649.333	737.333	794.333	894	400.667	562.667	464.667	928.333	2585	2867
Bmp8b	thermogenic_marker	6	0	21.6667	22.3333	16.5	12.1667	7.6	6.4	30.3333	30.3333	123.667	192.667	0	7	10	9	11	16.3333	8.33333	218.333
Il4	thermogenic_marker	99.5	112	138.333	160.333	27.6667	18.3333	0	0	11.6667	14	9.66667	7.33333	0	0	17	14.3333	13.3333	19	6.66667	7.33333
Foxc2	thermogenic_marker	42	33.3333	34.6667	32.3333	0	0	68.4	43.6	0	0	0	0	0	0	33.6667	35	7.66667	5	6	0
Nfe2l1	fatty_acid_marker	5988	6895.67	4704.33	5565.33	2101.5	2475	14366.2	13922.8	2479.67	2355.33	2962	2457.33	2298	2190.33	6185.67	5378	5975	5292	11197.7	10419.3
Nr1h2	fatty_acid_marker	868.5	861.333	510	650.333	1632.33	1810.67	1743.2	1667.4	1149.33	1215.67	1350	1273.33	507.333	555.667	674.333	898	772.333	717.333	1084.67	1024.67
Gyk	thermogenic_marker	0	0	0	0	584	578.833	985.6	964	0	0	0	0	0	0	0	0	0	0	0	0
Nr1h3	fatty_acid_marker	85.5	99.6667	66.6667	77	155.833	200	170.8	174.6	1250	1116.33	734.333	702	1858.33	2188	1196.67	1229	1419	1457.33	1597.67	1879
Nucb2	fatty_acid_marker	260	286.667	405.333	508.333	977.333	936.833	358	332.6	484.667	388.333	511.333	456.333	55.6667	135.667	489.333	2158.33	323	217	104	93
Oxsm	fatty_acid_marker	141	146	167	184.667	351.833	425.167	423.6	377.6	237.667	220.333	475	406.333	711.667	637.333	294.667	326	335	387.667	684.667	773.333
Pam	fatty_acid_marker	5267	6625	9293.67	10279.7	566.167	574.833	5799.2	5698.2	1676.33	1473.67	1764.33	1640.33	638.333	890.333	1803	2178.67	1926.33	1112.67	985	761
Pank2	fatty_acid_marker	1030	1172.67	813.667	888.333	1284	1554.5	1505.2	1543.4	1243	1134.33	1352.33	1213.67	485	514.333	745	955	875.333	937.333	893	857
Fgf21	thermogenic_marker	0	0	0	0	0	0	0	0	6	0	0	0	8	14.3333	0	12.6667	0	6.66667	0	23.3333
Pdk4	fatty_acid_marker	182.5	220.667	126.333	111.667	19.3333	30.3333	508	503.2	186	149.667	98.6667	76.6667	622.333	234	574.667	554	1377	4745.33	39241.7	31164.7
Pecr	fatty_acid_marker	51	60.3333	69	73.3333	69.1667	87.6667	142	122.8	83.3333	83.3333	211.333	179	2606	3209.33	138.333	336.333	170	243.333	415	339.333
Pex13	fatty_acid_marker	839.5	898.667	805.667	958	353.333	392.167	1180.2	1071	477.667	438.333	921	784	1120.33	1252.67	1713.33	2038	1865.67	2610	3478.67	3779
Pex2	fatty_acid_marker	523.5	532.667	403.667	489.667	504.833	602	1039.6	932.2	519	492.333	1167	1136	781.333	980	582.333	1070	703.667	990.667	1454.67	1592
Pex5	fatty_acid_marker	1148	1312.33	1102	1148.33	1024.83	1190.33	1421.4	1452.2	627	737.333	1003.67	844	2963	3349.67	1207	1588.33	1646	1606	3468.67	2636.67
Pex7	fatty_acid_marker	619.5	699.667	593.667	664.667	393	444.667	851.2	800	489.667	500	838.667	767	1084.67	1432.67	527.333	893	534	723	1157.67	1340.33
Phyh	fatty_acid_marker	1905.5	2205	1507.33	1791.33	703.167	706.833	3299	3140	583.333	558.333	2933.33	2807.33	34437	37838	2275.33	2332.67	2572	3127.67	12515.7	10033.3
Pla2g15	fatty_acid_marker	510.5	624.667	383	414	829.333	988	480.4	485.2	1222.67	1291.67	122.667	88	278.333	319	660.667	814.667	819.667	498.333	848.667	411.333
Gpr3	thermogenic_marker	89.5	133	58.6667	41.6667	0	0	150	173.6	0	0	0	0	0	0	0	0	0	0	0	0
Pla2g4a	fatty_acid_marker	123	122.667	92	104.667	794.167	823	626.4	542.4	590.667	586.333	804	730.667	33.6667	53.3333	413.667	390	194.667	152.667	31.3333	43
Plin5	fatty_acid_marker	18.5	21.6667	64	80.6667	15.1667	11.1667	26.6	26.4	22.6667	16.3333	16	12	1044	933.333	153.333	278.333	231	778.333	5058	4050.33
Plp1	fatty_acid_marker	27342	27977	23433.7	30785.3	41.8333	57	244631	211225	90.3333	79	63.3333	32.6667	29.6667	18.3333	68	84.3333	127.667	81.6667	110	93.3333
Pnpla8	fatty_acid_marker	3035	3524.67	2831	3286.33	1384.5	1570.33	2860.4	2636.6	1634.67	1533	1862	1666.33	3109.33	3398.67	3758.67	4715	3992.67	5834.67	7517.33	8989
Por	fatty_acid_marker	1325	1381	1455.67	1791.33	1738.83	1932.33	2003.2	2006.4	796.667	908.333	1309.67	1074.67	3016	3118.33	4138	3431	5731.33	2792.67	6011.67	4034.33
Ppard	fatty_acid_marker	157	189.333	102.333	140.333	436.5	463.667	854.2	870.4	171	147.333	1339.67	1094.33	286.333	106.333	191.667	238	220	181.667	159	204.333
Prkaa1	fatty_acid_marker	923	1079	1083.33	1289.33	1506.67	1731.67	1902.4	1791.8	1108	1127.33	1934.67	1650.33	345.333	326.333	1553.33	1476.33	1302.67	1088.33	1566.67	1688
Prkaa2	fatty_acid_marker	938	1212	880	1009.33	48.3333	69.5	791.6	695.2	28.6667	25.6667	2895.67	2235.67	2542	2201	431.667	489	479	770.333	1412.67	1777.33
Prkab1	fatty_acid_marker	275.5	259.667	204.667	227	2231.17	2806	509	430	883.333	1055.67	1496.67	1317.67	334.333	372.667	272	530.667	313.333	442.333	612.667	1408.67
Prkab2	fatty_acid_marker	618	671.667	512.667	542.667	409.667	449	1467.8	1374.4	494.667	447.333	253.667	200.667	60.6667	66.6667	381	411	470.667	422	452	346.333
Prkag1	fatty_acid_marker	1088.5	1218.67	803.667	936	2379.5	2729.17	1704	1655	1064	1246.33	1209.33	1102.67	510.667	641	630.333	1078	744	837.667	1460.33	1477
Prkag2	fatty_acid_marker	947	1050	1033.33	1245.33	479.333	500.5	2013.6	1728.8	421.333	387.667	836	673.667	587.333	549.333	991	1081.33	1060	1017.67	2824.67	1265.33
Prkar2b	fatty_acid_marker	1216.5	1507	1037	1164	3990	5111.67	1080	1102	1108	1530.67	239	185.333	137.333	39.6667	8701.33	5483	9309	10100.7	33044.3	24388
Ptges	fatty_acid_marker	66.5	79	75.6667	87.3333	102.167	87.1667	127.6	108.4	279.667	268	169	154	11	7	1460.67	1719.67	1117.67	1849.67	218	527.667
Ptges2	fatty_acid_marker	919	996.667	425.333	528.333	311.667	327.167	880.4	831.6	207.333	256.667	578.333	502.667	368	401.667	362.667	630.667	505	733	2028.33	1933
Ptges3	fatty_acid_marker	540	712	573.667	659	474.833	548.667	642	599.6	527.333	440.333	698	579.333	416	460.667	408.667	540.667	319	465	440.333	448.333
Hoxc10	thermogenic_marker	0	0	0	0	0	0	1635.8	2039.6	0	0	0	0	0	0	8.33333	5.33333	177	185.667	0	0
Ptgr1	fatty_acid_marker	34	30.3333	30.3333	34.3333	879.167	1026.67	81.8	70.2	87.6667	124.333	572.333	617.333	53.3333	74.3333	345	83.6667	93	74.6667	48.6667	60
Ptgs1	fatty_acid_marker	384.5	411.667	184	215.333	1654.83	1712	469.2	377.6	1286.33	1403	708	529.667	247.667	348.333	754.333	917	307.333	170.667	111.667	96.6667
Qk	fatty_acid_marker	6279.5	8117.67	9310	10638.7	3002.83	3620	15974	14476	3359	2959.67	827.667	529.333	1433.67	1314.67	5437.67	5417.67	4579.33	6653.33	9068.33	8250.67
Scap	fatty_acid_marker	1694	1897	2045.33	2375.33	1178.83	1368.5	3092.6	2963.2	1431.67	1452	1298.33	1119	3179	3467.67	869.333	1447.67	921.667	789.667	1429.33	1175.33
Gpr39	thermogenic_marker	0	0	0	0	0	0	0	0	0	5	107	117.667	76	91.6667	26.3333	73.3333	0	0	0	0
Scd1	fatty_acid_marker	4906	5643.67	5871.67	6709	1539.33	2212.17	22941.4	20877.6	9316	6930.67	3788	14230	67220.7	98345.7	418988	666668	417232	849910	776869	815748
Scd2	fatty_acid_marker	32796.5	35847	31596.7	38909.7	2455	2548	117582	105812	2044.33	1982	9699	11019	189	169	5035	13335.3	5123.33	11705.7	5529	16717.7
Scp2	fatty_acid_marker	681	710.333	440.667	538.333	1088.67	1014.67	1181.4	1156.8	534.333	535	1921.33	1933	47045	54386	3949.67	4518.67	3835	4280.33	5769.33	6832.33
Sesn2	fatty_acid_marker	231.5	262	278	308.333	524.667	581	477.8	484	375	435	255	247.667	171	162.667	527.333	516	373.333	319.667	674.333	284.333
Sgpl1	fatty_acid_marker	785.5	921	719.667	807	2618.83	2905.83	1501.4	1372.6	2799.67	2746.67	4855	4546.33	2170.67	2391.33	2465	2656.67	2469	2150.33	4455	4031
Sirt4	fatty_acid_marker	171	179.667	297	311.667	98.5	136.833	471.4	457	146.667	127.333	126	117.667	165.667	171	141.333	233.667	168	175.667	216.333	196.667
Slc25a17	fatty_acid_marker	541.5	619	491	569.667	699	845.833	1207.8	1147	481	468.333	624.667	579.667	1144.33	1267.67	623	912.333	615	1124.67	1859	2228.33
Slc27a1	fatty_acid_marker	1968	1944	2027	2313	189.167	213.333	3023.2	3042.4	344	289.333	412.667	483.333	181	167.667	6570.67	9626.33	10134.7	11315	5160.67	5930.33
Bmp8a	thermogenic_marker	5	0	0	0	0	0	5.6	5.2	8.33333	8.66667	137.333	212	0	0	0	33.6667	10.3333	7.33333	0	0
Slc27a2	fatty_acid_marker	174.5	222.333	373.667	441.667	14	9.5	492.8	500.6	7	8	853.333	621.333	27256.7	31679.7	129.333	168	33.6667	312.667	7204.67	3988.67
Slc27a3	fatty_acid_marker	94.5	89	201	244.667	62.3333	60.3333	174.6	177.8	142.667	134.333	53.6667	61	15.6667	18	50.3333	84.3333	103.333	67.6667	51	39
Slc27a4	fatty_acid_marker	1950	2195	1621.33	1853.67	2139.67	1893.83	3805.6	3643.2	398.333	432.333	11632.7	15017.7	790.333	827	592	1156.33	559	561	741.667	724
Slc45a3	fatty_acid_marker	54.5	51.6667	19.3333	26	112.167	160	418	354.2	776.667	790.667	55	58.3333	1202.67	1081.67	75.6667	805	48.3333	57.6667	21	17
Snca	fatty_acid_marker	2867.5	3394	1074.67	1252.33	7580.67	10838	1475.8	1508	2701.67	3470.33	16.3333	25.6667	19.3333	23.6667	124.667	123	75.3333	112	74	94.6667
Srebf1	fatty_acid_marker	1661.5	1677.33	2074	2453.33	1365.5	1670.5	3144	3166.2	1470.33	1572.67	1554.67	1546.33	3847.33	5869.67	4741.67	9769.67	7912.33	8368.33	6611.33	9872.33
Tbxas1	fatty_acid_marker	57.5	63.3333	67.6667	92.6667	1117.83	1361.17	87.8	70.8	758.667	817	282.333	209.667	75.3333	105.667	416.333	321.333	482.333	306	100.667	89.3333
Tecr	fatty_acid_marker	6185.5	6949	4521.33	5388.67	2757.17	3267.83	12398.8	11469.2	978.667	1048.33	1315	1237.33	1877	2131.33	992	2864.33	1535.67	2197.33	2719.67	3694.67
Them4	fatty_acid_marker	436.5	503.333	317	359	36.3333	38.6667	972.6	900.2	65.6667	62.6667	290	251	366.333	375.667	118	296.333	113	171.667	216.333	323
Tmem189	fatty_acid_marker	506	571	415.333	498.667	809.333	852.167	2289.2	2207.4	652.333	658.333	171	115.667	185.333	172	579.333	1050.67	632.667	452.333	431.667	428.333
Trex1	fatty_acid_marker	171.5	199	219.333	242.667	542.167	523.333	325	309.2	789	776.667	270.333	215.667	129	160	162.667	222.333	273	271.333	216.333	212.333
Trib3	fatty_acid_marker	13	13.6667	10.3333	12.3333	34.5	50.5	22.4	17.4	12.3333	15	56	59.6667	60.3333	80	67.6667	50.6667	77	64	118	111.333
Tysnd1	fatty_acid_marker	282.5	325.667	225	258.333	426.5	511.833	447.8	476	424	485	564.667	534	915	1027	456	817.667	658	896	2365.33	2682.33
Ksr2	thermogenic_marker	1554	1661.67	1727	1842.67	0	0	567.6	540.2	92.3333	98.3333	15	8	24.6667	20.3333	114.667	44.6667	19.3333	15	0	0
Wdtc1	fatty_acid_marker	1269	1427.33	956.667	1100.33	1808.33	2203.17	2742.8	2757.2	576	614	1209.67	940	1750.33	1811.67	496.667	702.667	637	530.333	1118.33	1244
