# Supplementary material for: Comparative multi-tissue profiling reveals extensive tissue-specificity in transcriptome reprogramming during thermal adaptation
Source: eLife. 2022 May 17;11:e78556. doi: 10.7554/eLife.78556 (PMC9113744; doi:10.7554/eLife.78556)
Supplement: Supplementary file 12. [file elife-78556-supp12.xlsx]

## Sheet: Suplementary File 12
Gene Symbol	number of members
Olfr	1084
Gm	1004
Zfp	357
Slca	334
Vmnr	322
Tmem	165
Ccdc	123
Fama	116
Ighv-	101
Igkv-	95
Famb	81
Rnf	76
Gpr	69
Wdr	60
Cd	57
Trim	57
Krt	50
Traj	50
Lrrc	49
Mrpl	49
Usp	47
Krtap-	46
Cola	44
Mapk	43
Defb	42
ERik	42
CRik	41
Prss	39
Ankrd	38
BC	38
Tasr	38
Fbxo	37
GRik	37
IRik	37
Klhl	36
LRik	36
Rpl	35
Zbtb	35
Arhgap	33
FRik	33
ORik	33
Tmemb	33
ARik	32
BRik	32
Cep	32
Ddx	32
Rbm	32
Rab	30
Snx	30
Cypa	29
HRik	29
KRik	29
Tmema	29
Ttc	29
DRik	28
Med	28
Adam	27
PRik	27
Dnajc	26
Mrps	26
NRik	26
Rps	26
Tex	26
Cfap	25
JRik	25
Trav-	25
Arhgef	24
Dusp	24
Olfr-ps	24
Travd-	24
Travn-	24
Zdhhc	24
Cdh	23
Cldn	23
Il	23
Pppr	23
Spata	23
Tbcd	23
Defa	22
Fbxw	22
Fgf	22
MRik	22
Pcdhb	22
Atpa	21
Btbdf	21
Mmp	21
Mup	21
Nudt	21
Hsdb	20
Kctd	20
Mettl	20
Rgs	20
Smim	20
Tspan	20
Adamts	19
Atpb	19
Ccl	19
Cdk	19
Nup	19
Asb	18
Famc	18
Fbxl	18
Prr	18
Sox	18
Car	17
Cdc	17
Ighd-	17
Ilra	17
Klf	17
Ptpn	17
Scgbb	17
Syt	17
Trbv	17
Vps	17
Zcchc	17
Cypc	16
Dhx	16
Galnt	16
Stk	16
Ceacam	15
Cleca	15
Kcnj	15
Abca	14
Akap	14
Aldha	14
Chst	14
Cxcl	14
Esp	14
Ifi	14
Ift	14
Ints	14
Kcnk	14
Klkb	14
Nkx-	14
Phf	14
Pouf	14
Prdm	14
Psmd	14
Rabb	14
Taf	14
Wfdc	14
Acot	13
Capn	13
Cypb	13
Dnajb	13
Ifna	13
Kif	13
Klk	13
Myh	13
Ndufa	13
Pex	13
Psg	13
Sa	13
Sulta	13
Tbx	13
Tmsf	13
Trbj-	13
Ttll	13
Abhd	12
Anxa	12
Bgalt	12
Btbd	12
Dnah	12
Efcab	12
Fkbp	12
Gbp	12
Naa	12
Parp	12
Pppra	12
Ppprb	12
Prla	12
Rdh	12
Sp	12
Spink	12
Tlr	12
Tnfrsf	12
Zfpb	12
Alg	11
Aqp	11
Armc	11
Casp	11
Dcaf	11
Dock	11
Hdac	11
Hoxa	11
Itga	11
Lsm	11
Mtmr	11
Nek	11
Pcdh	11
Pdea	11
Psmb	11
Raba	11
Samd	11
Skint	11
Srsf	11
Stx	11
Tcf	11
Tmed	11
Tmemc	11
Trappc	11
Ugta	11
Zkscan	11
Zscan	11
Abcc	10
Adcy	10
AI	10
Anapc	10
Ano	10
Arl	10
C	10
Ccr	10
Cnot	10
Commd	10
Cypf	10
DErtde	10
Fzd	10
Gng	10
Hoxb	10
Igfbp	10
Igsf	10
Kifa	10
Kifb	10
Klra	10
Lcn	10
Lrp	10
Ndufb	10
Scna	10
Tmprss	10
Tnfsf	10
Zch	10
Zfpa	10
Bcll	9
Bmp	9
Chd	9
Chrna	9
Cox	9
Cpne	9
Cst	9
Ef	9
Eifb	9
Emc	9
Epha	9
Exosc	9
F	9
Fabp	9
Gdf	9
Gpc	9
Hoxc	9
Hoxd	9
Hspb	9
Hsst	9
Irf	9
Kbtbd	9
Mcm	9
Mfsd	9
Mfsdb	9
Msa	9
Muc	9
Nme	9
Nol	9
Osbpl	9
Pax	9
Rassf	9
Rhox	9
Rpla	9
Serpinb	9
Slcb	9
Spag	9
Stard	9
Timm	9
Txndc	9
Abcb	8
Ak	8
Akrc	8
Alkbh	8
Aps	8
Atg	8
Bbs	8
Bgnt	8
Cacng	8
Cbx	8
Cdca	8
Chchd	8
Cog	8
Cqtnf	8
Cypd	8
Cypt	8
Dhrs	8
Eifa	8
Entpd	8
Exoc	8
Fndc	8
Fut	8
Gimap	8
Gpx	8
Grm	8
Haus	8
Htra	8
Ilf	8
Itgb	8
Kcna	8
Kcnh	8
Lgals	8
Lhx	8
Lrrcb	8
Lypd	8
Magea	8
Map	8
Mbd	8
Myl	8
Nat	8
Ndufaf	8
Ndufs	8
Pdcd	8
Plag	8
Plekha	8
Prmt	8
Prpf	8
Prx	8
Pry	8
Psma	8
Rfx	8
Rnase	8
Seca	8
-Sep	8
Serpina	8
Shisa	8
Slcoa	8
Slfn	8
Smad	8
Stgal	8
Thap	8
Tmc	8
Trav	8
Trmt	8
Trpm	8
Utp	8
Zfyve	8
Zswim	8
Adgrg	7
Angptl	7
Apm	7
Atf	7
AU	7
AW	7
Brd	7
Ccdcb	7
Cda	7
Clcn	7
Cmtm	7
Cops	7
Coq	7
Cxcr	7
Cypj	7
Dok	7
Dpp	7
Elovl	7
Enpp	7
Ercc	7
Fmo	7
Fxyd	7
Gja	7
Gstm	7
Gtpbp	7
H-Q	7
Hspa	7
Ifitm	7
Ilr	7
Ipo	7
Kdma	7
Kifc	7
Mageb	7
-Mar	7
Mpp	7
Myob	7
Natf	7
Ncoa	7
Nlrp	7
Nop	7
Paqr	7
Pcsk	7
Pdzd	7
Plpp	7
Pnpla	7
Ppprc	7
Rad	7
Ranbp	7
Senp	7
Sirt	7
Snrnp	7
Socs	7
Spaca	7
Ssxb	7
Taar	7
Tceal	7
Tdrd	7
Tgm	7
Tomm	7
Traf	7
Trpc	7
Uba	7
Ubxn	7
Ugtb	7
Wnt	7
Yipf	7
Abcg	6
Actr	6
Apb	6
Arf	6
Armcx	6
Bag	6
Bgalnt	6
Blocs	6
Bpifb	6
Btnl	6
Card	6
Ccdca	6
Cct	6
Cdr	6
Celf	6
Cers	6
Cntn	6
Coxa	6
Coxb	6
Cpa	6
Cpsf	6
Cul	6
Dctn	6
Dlx	6
Dph	6
Eml	6
Erich	6
Etv	6
Fgd	6
Gabra	6
Gata	6
Gemin	6
Gjb	6
Golga	6
Gpatch	6
Grk	6
Gtfc	6
Hes	6
H-M	6
H-M.	6
Hyal	6
Ighv--	6
Ilrb	6
Irx	6
Kdmb	6
Klhdc	6
Kpna	6
Lpar	6
Mrgprb	6
Mroh	6
Myoa	6
Nra	6
Nsun	6
Obox	6
Orc	6
Pak	6
Pcdha	6
Pdeb	6
Pdlim	6
Pikr	6
Pld	6
Plekhg	6
Pramel	6
Prdx	6
Prlc	6
Psmc	6
Rapgef	6
Rbbp	6
Reep	6
Rhoxa	6
Rpl-ps	6
Rpp	6
Rpska	6
Rrp	6
Secb	6
Setd	6
Sfb	6
Shd	6
Six	6
Slcf	6
Slitrk	6
Smg	6
Spr	6
Stgalnac	6
Stsia	6
Stxbp	6
Susd	6
Tcrg-V	6
Thoc	6
Tmco	6
Trip	6
Trpv	6
Tssk	6
Ubr	6
Vamp	6
Wnta	6
Wntb	6
Xkr	6
Xrcc	6
Zmym	6
Zmynd	6
AARik	5
Acad	5
Acbd	5
Acp	5
Acsl	5
Acsm	5
Adamtsl	5
Adgrf	5
ADRik	5
Agbl	5
Agpat	5
Ang	5
Arrdc	5
Asic	5
Atxn	5
Atxnl	5
Bcl	5
Bend	5
Bex	5
Birc	5
Bpifa	5
Cabp	5
Cacnad	5
Cdb	5
Cdcep	5
Cdhr	5
Cdkl	5
Cdld	5
Cesa	5
Chil	5
Chrm	5
Clecb	5
Clic	5
Coa	5
Crebl	5
Dcund	5
Dennda	5
Dlg	5
Dlgap	5
Drd	5
Ear	5
Efna	5
Elf	5
Elp	5
Ephb	5
Fame	5
Fhl	5
Frmd	5
Gas	5
Gcnt	5
Gdpd	5
Gltd	5
Gna	5
Gnb	5
Gtfh	5
Herc	5
Histhc	5
Hmgb	5
Hps	5
Hsf	5
H-T	5
Igkj	5
Ikzf	5
Ing	5
Iqcf	5
Itih	5
Kcnq	5
Lama	5
Lamtor	5
Lmo	5
Lrfn	5
Lyrm	5
Mcpt	5
Mcr	5
Megf	5
Mfsda	5
Mllt	5
Morn	5
Mrgpra	5
Msh	5
Myo	5
Napl	5
Npyr	5
Olfm	5
Pabpc	5
Padi	5
Pcdhga	5
Pcgf	5
Pdia	5
Pfdn	5
Pkdl	5
Plin	5
Plk	5
Plppr	5
Plscr	5
Ppil	5
Ppprd	5
Pramef	5
Rabfip	5
Rbp	5
Rfc	5
Rpll	5
Saa	5
Scamp	5
Scd	5
Secl	5
Semaa	5
Serinc	5
Sfxn	5
Slamf	5
Smc	5
Smpd	5
Smyd	5
Snap	5
Snapc	5
Spint	5
Srp	5
Sstr	5
St	5
Stat	5
Supt	5
Svs	5
Sytl	5
Tbcdb	5
Tclb	5
Tdpoz	5
Tekt	5
Tle	5
Tnfaip	5
Trbv-	5
Tspyl	5
Ttcb	5
Tubgcp	5
Uncb	5
Vpsa	5
Vpsb	5
Vsig	5
Washc	5
Xpo	5
Ypel	5
Zfand	5
Zic	5
Zmat	5
Sun	4
Abcd	4
Abhdb	4
Ackr	4
Actn	4
Adgrl	4
Adh	4
Aff	4
Ago	4
AHRik	4
Akrb	4
Aldhb	4
Alox	4
ALRik	4
Amya	4
Ank	4
Aox	4
Apoa	4
Apobec	4
Apoc	4
Apola	4
Apolb	4
Arida	4
Aridb	4
Arla	4
Arlip	4
Arpc	4
Art	4
Ascl	4
Atpc	4
Atpva	4
Atpve	4
AY	4
Bgat	4
Bhlhe	4
Borcs	4
Btg	4
Cacnb	4
Cadm	4
Calm	4
Catsper	4
Cbln	4
Cbr	4
Cdcb	4
Cdd	4
Cdl	4
Cetn	4
Chmp	4
Chrnb	4
Cib	4
Cldnb	4
Clip	4
Clk	4
Cln	4
Cnga	4
Cnih	4
Cnnm	4
Cnpy	4
Cntnap	4
Cpeb	4
Cplx	4
Cql	4
Crisp	4
Cts	4
Cwc	4
Cxxc	4
Cybd	4
Cybr	4
Cypab	4
Cyth	4
Denndb	4
Dgcr	4
Dkk	4
Dnaaf	4
Dnaja	4
Dppa	4
Dpyl	4
Dpysl	4
Dtx	4
DWsue	4
Ebf	4
Egr	4
Ehd	4
Eife	4
Eifg	4
Elavl	4
Eno	4
Epbl	4
Ephx	4
Epsl	4
Eya	4
Fads	4
Famd	4
Famf	4
Fastkd	4
Fat	4
Fbln	4
Ffar	4
Fgfr	4
Foxd	4
Foxn	4
Foxo	4
Foxp	4
Fpr-rs	4
Fstl	4
Galst	4
Gfra	4
Ggt	4
Gins	4
Glra	4
Glrx	4
Gp	4
Grb	4
Gria	4
Gsdmc	4
Gsta	4
Gstt	4
Hacd	4
Hapln	4
Hcn	4
Heatr	4
Hipk	4
Histha	4
Histhb	4
Hmgn	4
Hrh	4
Htrb	4
Icam	4
Id	4
Ighj	4
Ila	4
Irak	4
Irs	4
Izumo	4
Jmjd	4
Jph	4
Kank	4
Kcnc	4
Kcne	4
Kcng	4
Kcnip	4
Kcnmb	4
Kcnn	4
Klc	4
Lamp	4
Larp	4
Lcea	4
Ldlrad	4
Lgi	4
Lhfpl	4
Lin	4
Lingo	4
Lmbtl	4
Loxl	4
Lpcat	4
Lrch	4
Lrrcc	4
Lrrn	4
Lrrtm	4
Ltbp	4
Ly	4
Lyg	4
Lysmd	4
Mana	4
Mapd	4
Mapkip	4
Mark	4
Mast	4
Matn	4
Mboat	4
Mettla	4
Mfap	4
Mgat	4
Mphosph	4
Msantd	4
Mt	4
Mylk	4
Naip	4
Ndrg	4
Ndst	4
Nectin	4
Nedd	4
Neu	4
Neurod	4
Nfatc	4
Nhlrc	4
Nipal	4
Nkain	4
Notch	4
Npas	4
Nrc	4
Nrf	4
Nrg	4
Nrh	4
Nxf	4
Nxpe	4
Nxph	4
Odf	4
Oog	4
Otud	4
Pank	4
Pate	4
Pbx	4
Pcbp	4
Pcnx	4
Pdk	4
Pfkfb	4
Pfn	4
Pglyrp	4
Pgm	4
Ph	4
Phactr	4
Pias	4
Pkp	4
Plcb	4
Plxna	4
Pnma	4
Pold	4
Pole	4
Pop	4
Ppfia	4
Prickle	4
Prrg	4
Prrt	4
Psd	4
Psme	4
Psmg	4
Ptchd	4
Ptger	4
Ptpa	4
Pus	4
Radb	4
Rasa	4
Rasgrp	4
Rbmb	4
Rims	4
Ripk	4
Robo	4
Rpla-ps	4
Rpsa	4
Rpusd	4
Rspo	4
Rtn	4
Rtp	4
Rufy	4
Rxfp	4
Sall	4
Samt	4
Sap	4
Scaf	4
Scgba	4
Scnb	4
Sdc	4
Sdhaf	4
Sec	4
Sell	4
Semab	4
Serpinbb	4
Serpinbc	4
Sertad	4
Sfrp	4
Shb	4
Shbp	4
Shc	4
Shroom	4
Slce	4
Smarca	4
Smco	4
Spg	4
Sprra	4
Spsb	4
Srrm	4
Ssbp	4
Ssr	4
Steap	4
Stmn	4
Stpg	4
Sultb	4
Surf	4
Syne	4
Syngr	4
Tcrg-C	4
Tead	4
Tenm	4
Thbs	4
Them	4
Timp	4
Tmbim	4
Tmod	4
Tmtc	4
Tmx	4
Tnfrsfb	4
Tns	4
Tora	4
Tox	4
Tpm	4
Trgj	4
Trima	4
Tscd	4
Tsen	4
Ttca	4
Tubb	4
Tulp	4
Tusc	4
Ubqln	4
Uchl	4
Ulk	4
Unc	4
Unca	4
Vgll	4
Vwa	4
Wbp	4
Wbscr	4
Wdfy	4
Wnk	4
Zbed	4
Zfpl	4
Znhit	4
Znrf	4
AA	3
Abcf	3
Abhda	3
Abi	3
Ablim	3
Acap	3
Acat	3
Ace	3
Acer	3
Acox	3
Acss	3
Actrt	3
Adama	3
Adamb	3
Adat	3
Adck	3
Add	3
Adgra	3
Adgrb	3
Adgre	3
Adrb	3
AF	3
Agap	3
Aifm	3
AIRik	3
AJRik	3
AKRik	3
Akt	3
Alpk	3
Alx	3
Amer	3
Amigo	3
Ampd	3
Angpt	3
Ankrdb	3
Anks	3
Aoc	3
Apba	3
Arap	3
Arfgap	3
Arfgef	3
Arlb	3
Asap	3
Ascc	3
Asxl	3
Atad	3
Atga	3
Atgb	3
Atl	3
Atoh	3
Atpg	3
Atpvb	3
Atpvc	3
Atpvd	3
Atpvg	3
Batf	3
Bcas	3
Bclb	3
BCRik	3
Best	3
Bglap	3
Bnip	3
Bola	3
Brinp	3
Calhm	3
Calr	3
Camsap	3
Capza	3
Casc	3
Cav	3
Ccd	3
Ccda	3
Ccnb	3
Ccnd	3
Cde	3
Cdkrap	3
Cdx	3
Cecr	3
Celsr	3
Cesb	3
CFRik	3
Cisd	3
Cited	3
Ckap	3
Clcaa	3
Cldnc	3
Cldnd	3
Clrn	3
Clstn	3
Cmc	3
CMRik	3
Cnksr	3
Cnn	3
Colec	3
Coxc	3
Cphx	3
Crb	3
Creb	3
Crip	3
Crlf	3
Crtc	3
Cryba	3
Crybb	3
Cs	3
Csf	3
Csmd	3
Csnka	3
Csnkg	3
Csrnp	3
Csrp	3
Cstf	3
Ctnna	3
Ctxn	3
Cyba	3
Dact	3
Dapk	3
Dclk	3
Dcpp	3
Denndc	3
Derl	3
DHRik	3
Diaph	3
Dio	3
Dll	3
Dmrt	3
Dnasel	3
Dnm	3
Dpep	3
Dpf	3
Dpm	3
Drc	3
Dsc	3
Dsg	3
Dusl	3
Duxbl	3
Dvl	3
Dyncli	3
Dyrk	3
Echdc	3
Eci	3
Edem	3
Edn	3
Efnb	3
Egfl	3
Egln	3
Eif	3
Eifak	3
Eifebp	3
Elk	3
Ell	3
Elmo	3
Elmod	3
Emilin	3
Emp	3
Epn	3
Erbb	3
Ergic	3
Eri	3
Erp	3
Esyt	3
Exocl	3
Extl	3
Faap	3
Fcgr	3
Fcrl	3
Fermt	3
Flrt	3
Flt	3
Fmnl	3
Foxa	3
Foxi	3
Foxj	3
Fpr	3
Frem	3
Frl	3
Frmpd	3
Fscn	3
Gab	3
Gabrb	3
Gabrg	3
Gabrr	3
Gasl	3
Gga	3
Gipc	3
Gjc	3
Gjd	3
Gk	3
Gkn	3
Glbl	3
Gli	3
Glis	3
Gnai	3
Gnat	3
Gnl	3
Gpat	3
Gpd	3
Gpn	3
Gprin	3
Gpsm	3
Gramd	3
Grhl	3
Grina	3
Gsdma	3
Gstp	3
Gtfa	3
Has	3
Hectd	3
Hint	3
Histhaa	3
Histhd	3
Hivep	3
Hk	3
Hmga	3
Hmx	3
Hnrnpa	3
Hnrnph	3
Homer	3
Hook	3
Hspaa	3
Hspab	3
Htr	3
Ier	3
Ifit	3
Iglv	3
Ilb	3
Insl	3
Ipk	3
Iqgap	3
Iqsec	3
Itgbbp	3
Itpr	3
Jade	3
Jak	3
Jakmip	3
Kansl	3
Kat	3
Kcnab	3
Kcnd	3
Kcns	3
Kdelr	3
Khdrbs	3
Kirrel	3
Klrc	3
Krtap	3
Lamb	3
Lamc	3
Lancl	3
Ldb	3
Lemd	3
Leng	3
Lgr	3
Lig	3
Lipo	3
Lmod	3
Lonrf	3
Lpin	3
Lrig	3
Lrit	3
Lrrca	3
Lrriq	3
Ltbr	3
Lucl	3
Luzp	3
Lyzl	3
Lzts	3
Mabl	3
Madl	3
Magi	3
Maml	3
Manb	3
Mapkapk	3
Mapre	3
Marveld	3
Mbnl	3
Mcoln	3
Mdm	3
Me	3
Meis	3
Mettlb	3
Mgst	3
Mical	3
Micu	3
Mier	3
Mkrn	3
Mocs	3
Morc	3
Mospd	3
Mpzl	3
Mrm	3
Msl	3
Msrb	3
Msx	3
Mta	3
Mterf	3
Mtx	3
Mxd	3
Mybpc	3
Myoc	3
Myom	3
Myoz	3
Nanos	3
Nav	3
Nbp	3
Ncbp	3
Ncf	3
Ndufv	3
Necab	3
Neil	3
Neurl	3
Neurog	3
Nfel	3
Nlgn	3
Nlrc	3
Nlrpa	3
Nlrpb	3
Nmnat	3
Nocl	3
Nos	3
Nox	3
Nphp	3
Npm	3
Npr	3
Nrd	3
Nrip	3
Nrxn	3
Nsd	3
Nsmce	3
Ntc	3
Ntdc	3
Ntn	3
Ntrk	3
Nudcd	3
Nupl	3
Oaz	3
Odfl	3
Ogfod	3
Olig	3
Onecut	3
Oosp	3
Opn	3
Orai	3
Orm	3
Ormdl	3
Otop	3
Pacsin	3
Pafahb	3
Palm	3
Panx	3
Papd	3
Pcdhgc	3
Pdcl	3
Pdec	3
Peg	3
Peli	3
Per	3
Pgam	3
Pgap	3
Pha	3
Phb	3
Phc	3
Phfa	3
Phlda	3
Phldb	3
Pihd	3
Pim	3
Pitpnm	3
Pitx	3
Piwil	3
Pkn	3
Plaga	3
Plagb	3
Plcd	3
Plcxd	3
Plekhh	3
Plekhm	3
Plod	3
Plxnb	3
Polra	3
Polrb	3
Polrc	3
Polrd	3
Polre	3
Pon	3
Pppc	3
Pppca	3
Pppcb	3
Pqlc	3
Prg	3
Prkag	3
Prkd	3
Prlb	3
Prld	3
Prm	3
Proser	3
Prpfb	3
Prra	3
Prrl	3
Ptbp	3
Ptcd	3
Ptges	3
Ptk	3
Pum	3
Rabc	3
Rabgap	3
Rabl	3
Rac	3
Radl	3
Rai	3
Ramp	3
Rasal	3
Rbfox	3
Rbms	3
Rcan	3
Rcn	3
Rcor	3
Recql	3
Reg	3
Rexo	3
Rgl	3
Rhbdd	3
Rhbdl	3
Rhdm	3
Rhobtb	3
Rhoxc	3
Rhoxe	3
Rhoxf	3
Rin	3
Ripply	3
Rmdn	3
Rnd	3
Rnfa	3
Rp	3
Rpa	3
Rpap	3
Rplp	3
Rsph	3
Rspha	3
Runx	3
Ryr	3
Sbk	3
Scg	3
Scrn	3
Scube	3
Scyl	3
Sdrc	3
Secc	3
Semac	3
Semad	3
Serpinba	3
Serpinbd	3
Serpine	3
Sesn	3
Setdb	3
Sfa	3
Sftd	3
Sgk	3
Sgsm	3
Shank	3
Shbgrl	3
Shda	3
Shdb	3
Shgl	3
Shrf	3
Sik	3
Sipal	3
Ska	3
Slcab	3
Slcc	3
Slcd	3
Slcg	3
Slcoc	3
Slit	3
Smarcd	3
Snai	3
Snrpd	3
Sod	3
Sorbs	3
Sorcs	3
Spcs	3
Speer	3
Spns	3
Spock	3
Spred	3
Spry	3
Spryd	3
Sptbn	3
Sptlc	3
Srda	3
Srgap	3
Srpk	3
Ssh	3
Stac	3
Stag	3
Stfa	3
Stoml	3
Strn	3
Stxa	3
Sumo	3
Sval	3
Syce	3
Sycp	3
Syn	3
Tab	3
Tac	3
Tacc	3
Tacr	3
Tafb	3
Tafl	3
Tagln	3
Taok	3
Tatdn	3
Tcaf	3
Tcea	3
Tcfl	3
Tcte	3
Tctexd	3
Tet	3
Tff	3
Tgfb	3
Tgfbr	3
Themis	3
Thumpd	3
Tigd	3
Timma	3
Timmb	3
Tjp	3
Tlx	3
Tmcc	3
Tmd	3
Tnfaipl	3
Tnfrsfa	3
Tnip	3
Tnni	3
Tnnt	3
Tnpo	3
Tppp	3
Trafip	3
Trav--dv	3
Trdv	3
Trem	3
Treml	3
Trib	3
Trimb	3
Trmta	3
Trp	3
Try	3
Tsga	3
Tshz	3
Tsr	3
Tstd	3
Ttyh	3
Tubaa	3
Txnrd	3
Tyw	3
Ubea	3
Ubeb	3
Ubed	3
Ubee	3
Ubl	3
Ucn	3
Ucp	3
Uqcc	3
Usf	3
Vav	3
Vdac	3
Vpreb	3
Vpsd	3
Vrk	3
Vwab	3
Wasf	3
Wipf	3
Wisp	3
Xlra	3
Xlrb	3
Xlrc	3
Xpnpep	3
Ybx	3
Ythdf	3
Zcha	3
Zfhx	3
Zfpc	3
Zhx	3
Zp	3
Zranb	3
Sat	2
Aadacl	2
Aars	2
Abl	2
Abtb	2
Acnat	2
Aco	2
ACRik	2
Acsbg	2
Acsf	2
Acta	2
Actg	2
Actl	2
Actla	2
Actlb	2
Actrb	2
Acvrb	2
Acy	2
Acyp	2
Adad	2
Adap	2
Adarb	2
Adipor	2
Adm	2
Adnp	2
Adora	2
Adprhl	2
Adraa	2
Adrab	2
Aebp	2
Afapl	2
Afgl	2
Agalt	2
Agfg	2
Agr	2
AGRik	2
Agxt	2
Ahcyl	2
Ahnak	2
Ahsa	2
Aim	2
Aimp	2
Akirin	2
Akra	2
Alas	2
Aldhl	2
Aldoart	2
Aloxe	2
Alscr	2
Alyref	2
Amd	2
Amdhd	2
Amn	2
Amotl	2
Amz	2
Angel	2
Ankle	2
Ankmy	2
Ankrda	2
Ankrdc	2
Anksb	2
Antxr	2
Apa	2
Apbb	2
Apc	2
Apex	2
Apg	2
Aplp	2
Apol	2
Appl	2
APRik	2
Arfip	2
Arg	2
Arih	2
Arlc	2
Arnt	2
Arntl	2
Arpp	2
Arrb	2
Arxes	2
Asah	2
Asgr	2
Ashl	2
Asmt	2
Asphd	2
Astn	2
Atfip	2
Atgl	2
Atpaf	2
Atpap	2
Atpd	2
Atpj	2
Awat	2
Axin	2
Azin	2
Bace	2
Bach	2
Baiap	2
Baiapl	2
Banf	2
Barhl	2
Barx	2
Baza	2
Bazb	2
BB	2
Bcap	2
Bcar	2
Bcat	2
Bcla	2
Bco	2
Bd	2
Bdh	2
Bdkrb	2
BFRik	2
Bfsp	2
Bhlha	2
Bhmt	2
Bicd	2
Bicdl	2
Bin	2
BJRik	2
Bnc	2
Bnipl	2
Brca	2
Brf	2
Brpf	2
Brsk	2
Brwd	2
Bsph	2
Bst	2
Btg-ps	2
Btna	2
Bub	2
Bud	2
Bzw	2
Cables	2
Cadps	2
Calb	2
Calcoco	2
Calml	2
Camk	2
Camkd	2
Camkg	2
Camkk	2
Camkn	2
Camta	2
Cand	2
Cap	2
Capns	2
Caprin	2
Cars	2
Caskin	2
Casq	2
Catsperg	2
Cb	2
Cbfat	2
Cby	2
Ccar	2
Ccdb	2
Ccdcc	2
Ccer	2
Ccla	2
Cclb	2
Ccna	2
Ccne	2
Ccng	2
Ccnl	2
Ccnt	2
Ccrl	2
Ccser	2
Cdcl	2
Cdcp	2
Cdcse	2
Cdg	2
Cdkap	2
Cdkna	2
Cdknb	2
Cdknc	2
Cdkr	2
Cdlg	2
Cds	2
Cdyl	2
Celaa	2
Cepl	2
Cesc	2
Cese	2
Cesf	2
Cesg	2
Cfhr	2
Cfl	2
CGRik	2
Chac	2
Chek	2
Chic	2
Chmpa	2
Chmpb	2
Chn	2
Chp	2
Chpf	2
Chrdl	2
Chsy	2
Chtf	2
Cilp	2
Ckmt	2
CKRik	2
Clasp	2
Clca	2
Clcab	2
Clecd	2
Clece	2
Clecg	2
Clvs	2
Cma	2
Cmpk	2
Cmtr	2
Cndp	2
Cngb	2
Cnr	2
Colgalt	2
Copb	2
Copg	2
Copz	2
Coqa	2
Coqb	2
Coro	2
Coroa	2
Corob	2
Coxi	2
Cpb	2
Cpn	2
Cpxm	2
Crabp	2
Creg	2
Creld	2
Crhr	2
Crispld	2
Crl	2
Cry	2
Cryzl	2
Csfr	2
Csfrb	2
Csgalnact	2
Csn	2
Cspg	2
Cstdc	2
Ctbp	2
Ctdsp	2
Ctdspl	2
Ctf	2
Ctnnd	2
Ctps	2
Ctu	2
Cuedc	2
Cux	2
Cwfl	2
Cybb	2
Cyfip	2
Cylc	2
Cypaa	2
Cysltr	2
Daam	2
Dab	2
Dach	2
Dap	2
DARik	2
Dars	2
Dazap	2
Dbndd	2
DBRik	2
Dbx	2
Dcafl	2
Dcbld	2
Ddah	2
Ddb	2
Ddhd	2
Ddi	2
Ddit	2
Ddr	2
DDRik	2
Ddxb	2
Decr	2
Dedd	2
Def	2
Degs	2
Depdc	2
Desi	2
Dgat	2
Dhcr	2
Diras	2
Disl	2
Disp	2
DJRik	2
DKRik	2
Dlk	2
DLRik	2
Dmrta	2
Dmrtcc	2
Dmxl	2
Dnaic	2
Dnal	2
Dnttip	2
Dopey	2
Dram	2
Drg	2
Dtd	2
Dtwd	2
Duox	2
Duoxa	2
Dydc	2
Dynch	2
Dynci	2
Dynll	2
Dynlrb	2
Dzip	2
Eaf	2
EARik	2
Ece	2
Ecm	2
Edar	2
Edc	2
EDRik	2
Eefa	2
Efemp	2
Efhc	2
Efhd	2
Ehmt	2
Eid	2
Eifd	2
Eifh	2
Eifj	2
Eifs	2
EJRik	2
Elac	2
Elfn	2
Eme	2
Emx	2
En	2
Enox	2
Ep	2
Epb	2
Epc	2
Eps	2
Erc	2
Erccl	2
Erlin	2
Ern	2
Esco	2
Esr	2
Esrp	2
Etnk	2
Ets	2
Evc	2
Evx	2
Exd	2
Exo	2
Ext	2
Ezh	2
Fa	2
Faf	2
Fah	2
Faim	2
Far	2
Farp	2
Fbn	2
Fbp	2
Fcera	2
Fcho	2
Fchsd	2
Fez	2
Fezf	2
Fgfbp	2
Fgfrop	2
Fgl	2
Fhod	2
Fignl	2
Fitm	2
Flg	2
Flot	2
Flywch	2
Fmn	2
Fnbp	2
Fnip	2
Folr	2
Fosl	2
Foxb	2
Foxc	2
Foxe	2
Foxf	2
Foxk	2
Foxr	2
Foxred	2
Fr	2
Frs	2
Fsd	2
Fsip	2
Ftsj	2
Fubp	2
Fuca	2
Fundc	2
Fxr	2
Gabarapl	2
Gabbr	2
Gabpb	2
Gad	2
Galk	2
Galntl	2
Galr	2
Garem	2
Gatsl	2
Gba	2
Gbx	2
Gcc	2
Gcm	2
Gdap	2
Gdi	2
Gfm	2
Gfod	2
Gfpt	2
Ggnbp	2
Gid	2
Gigyf	2
Git	2
Glipr	2
Gliprl	2
Glod	2
Glpr	2
Gls	2
Gltscr	2
Gmeb	2
Gml	2
Gmpr	2
Gngt	2
Gnpda	2
Gorasp	2
Gosr	2
Got	2
Gprasp	2
Gprb	2
Gprca	2
Gps	2
Gpt	2
Grap	2
Grem	2
Grid	2
Grinb	2
Grip	2
[truncated: 5,919 more rows]
