# Supplementary material for: Comparative multi-tissue profiling reveals extensive tissue-specificity in transcriptome reprogramming during thermal adaptation
Source: eLife. 2022 May 17;11:e78556. doi: 10.7554/eLife.78556 (PMC9113744; doi:10.7554/eLife.78556)
Supplement: Supplementary file 13. [file elife-78556-supp13.xlsx]

## Sheet: Suplementary File 13
Study design
Tissue	Groups	Mice per group	Number of samples per group
iBAT	CE vs RT	6	3 (pool of 2 mice each)
Bone marrow	CE vs RT	6	6 individual mice
Brain	CE vs RT	6	3 (pool of 2 mice each)
Hypothalamus	CE vs RT	6	3 (pool of 2 mice each)
Ileum	CE vs RT	6	3 (pool of 2 mice each)
Liver	CE vs RT	6	3 (pool of 2 mice each)
ingSAT	CE vs RT	6	3 (pool of 2 mice each)
Spinal cord	CE vs RT	5	5 individual mice
Spleen	CE vs RT	6	3 (pool of 2 mice each)
pgVAT	CE vs RT	6	3 (pool of 2 mice each)
Quadriceps	Warm vs RT	6	3 (pool of 2 mice each)
iBAT	Warm vs RT	3 (RT) to 4 (warm)	3 individual mice (RT) or 2 individual mice and a pool of 2 mice (warm)
Brain	Warm vs RT	6	3 (pool of 2 mice each)
Ileum	Warm vs RT	6	3 (pool of 2 mice each)
Liver	Warm vs RT	6	3 (pool of 2 mice each)
ingSAT	Warm vs RT	6	3 (pool of 2 mice each)
pgVAT	Warm vs RT	6	3 (pool of 2 mice each)
Quadriceps	Warm vs RT	6	3 (pool of 2 mice each)
